# Supplementary material for: Regulation of chromatin accessibility by hypoxia and HIF
Source: Biochem J. 2022 Mar 28;479(6):767–86. doi: 10.1042/BCJ20220008 (PMC9022986; doi:10.1042/BCJ20220008)
Supplement: Supplementary Material 2 [file BCJ-479-767-s2.pdf]

## Sheet: QC
Name	Full name	Total reads	Total reads final	mitochondrial and non standard chromosome reads removed (%)	Poor quality alignment/poorly paired reads removed (%)	PCR and optical duplicates removed (%)	Peaks FDR <0.05	Peaks FDR <1X10-15
S33	HeLa 0h Hpx n1	278323104	165185888	6.85326	16.5174	17.279
S40	HeLa 0h Hpx n2	236927897	148712846	5.68903	16.396	15.1478
S28	HeLa 1h Hpx n1	212765604	132860786	6.67562	16.9057	13.974
S35	HeLa 1h Hpx n2	214023614	132720204	5.77827	17.1573	15.0525
S30	HeLa 24h Hpx n1	193269571	125594212	4.79715	17.0084	13.2105
S44	HeLa 24h Hpx n2	169171924	112380438	2.90222	17.1062	13.5619
S32	HeLa Reox Hpx n1	184163900	116080526	7.87841	17.5911	11.4994
S39	HeLa Reox Hpx n2	200366816	123624414	7.07541	16.8779	14.3477
S27	HeLa 0h Hpx siHIF-1β n1	184031407	118756764	5.58716	16.9052	12.977
S41	HeLa 0h Hpx siHIF-1β n2	170289968	110364744	5.06217	16.6947	13.4332
S36	HeLa 1h Hpx siHIF-1β n1	226375275	143577682	4.39956	16.8109	15.3649
S43	HeLa 1h Hpx siHIF-1β n2	200840495	130051700	4.97729	16.702	13.5669
S31	HeLa 24h Hpx siHIF-1β n1	146526219	99031384	3.74186	18.1392	10.5328
S38	HeLa 24h Hpx siHIF-1β n2	157698409	103854954	4.11357	17.7771	12.2527
S1	HeLa 0h VH298 n1	242590963	163601712	4.09962	15.8658	12.5953
S11	HeLa 0h VH298 n2	252730583	175759194	2.76214	16.3963	11.2975
S3	HeLa 24h VH298 n1	182557591	114325038	8.7733	15.6417	12.9609
S13	HeLa 24h VH298 n2	230776031	149565916	5.34839	15.8275	14.0141

## Sheet: 0h Hpx 
seqnames	start	end	width	strand
1	605452	605718	267	*
1	778286	779471	1186	*
1	826637	827894	1258	*
1	858670	859018	349	*
1	869559	870266	708	*
1	875154	875832	679	*
1	904262	904966	705	*
1	906752	907298	547	*
1	910602	911561	960	*
1	925512	925942	431	*
1	938182	938897	716	*
1	941623	942309	687	*
1	943109	943478	370	*
1	958946	959877	932	*
1	960354	961390	1037	*
1	966004	967409	1406	*
1	975875	976706	832	*
1	999791	1000976	1186	*
1	1001462	1002137	676	*
1	1005205	1005576	372	*
1	1013150	1014659	1510	*
1	1019271	1019994	724	*
1	1021090	1021775	686	*
1	1024630	1025517	888	*
1	1058439	1059944	1506	*
1	1063803	1064567	765	*
1	1068840	1069491	652	*
1	1073886	1074809	924	*
1	1079389	1080611	1223	*
1	1115764	1116886	1123	*
1	1121741	1122524	784	*
1	1157376	1158620	1245	*
1	1208042	1208698	657	*
1	1231086	1232394	1309	*
1	1244061	1244676	616	*
1	1258513	1259023	511	*
1	1264758	1265606	849	*
1	1273256	1274790	1535	*
1	1281499	1282498	1000	*
1	1290943	1292189	1247	*
1	1304716	1305968	1253	*
1	1307914	1308794	881	*
1	1318265	1318674	410	*
1	1324279	1325783	1505	*
1	1330585	1331677	1093	*
1	1344667	1346398	1732	*
1	1347674	1348423	750	*
1	1352970	1354124	1155	*
1	1359717	1360948	1232	*
1	1374558	1375733	1176	*
1	1398956	1400575	1620	*
1	1406565	1407997	1433	*
1	1440753	1441905	1153	*
1	1471329	1472127	799	*
1	1504743	1505817	1075	*
1	1511364	1512474	1111	*
1	1554547	1555221	675	*
1	1573990	1575533	1544	*
1	1597318	1597963	646	*
1	1599556	1599910	355	*
1	1615010	1616831	1822	*
1	1627140	1629015	1876	*
1	1658657	1659544	888	*
1	1686180	1687037	858	*
1	1692253	1693502	1250	*
1	1723976	1724864	889	*
1	1740959	1741507	549	*
1	1746185	1746773	589	*
1	1758613	1760062	1450	*
1	1777586	1779265	1680	*
1	1782581	1783300	720	*
1	1858687	1859757	1071	*
1	1889904	1892008	2105	*
1	1894472	1894908	437	*
1	1906248	1907858	1611	*
1	1908399	1909506	1108	*
1	1918836	1920034	1199	*
1	1943824	1944495	672	*
1	1959655	1960580	926	*
1	1968914	1969748	835	*
1	2003483	2004195	713	*
1	2015069	2015564	496	*
1	2044720	2045176	457	*
1	2049513	2050954	1442	*
1	2104320	2105550	1231	*
1	2132916	2133964	1049	*
1	2139791	2140491	701	*
1	2174096	2174790	695	*
1	2189317	2190654	1338	*
1	2194567	2195725	1159	*
1	2199109	2199799	691	*
1	2205170	2205518	349	*
1	2207143	2208913	1771	*
1	2212455	2213411	957	*
1	2227491	2228114	624	*
1	2231616	2232169	554	*
1	2234238	2235037	800	*
1	2311391	2312037	647	*
1	2314335	2315036	702	*
1	2322228	2323058	831	*
1	2330737	2331470	734	*
1	2360588	2361451	864	*
1	2381503	2382940	1438	*
1	2391024	2392370	1347	*
1	2411912	2413643	1732	*
1	2447907	2448487	581	*
1	2801471	2802037	567	*
1	2821814	2822479	666	*
1	2875774	2876241	468	*
1	2922060	2922432	373	*
1	3066210	3066537	328	*
1	3244949	3245282	334	*
1	3312922	3313728	807	*
1	3319841	3320465	625	*
1	3410181	3410674	494	*
1	3419429	3420060	632	*
1	3424595	3425059	465	*
1	3453117	3453684	568	*
1	3453776	3455166	1391	*
1	3471147	3472111	965	*
1	3473490	3473986	497	*
1	3481823	3482856	1034	*
1	3491219	3492049	831	*
1	3503817	3505179	1363	*
1	3509833	3510969	1137	*
1	3515825	3516886	1062	*
1	3529975	3532068	2094	*
1	3542726	3543908	1183	*
1	3547222	3548803	1582	*
1	3553425	3553733	309	*
1	3554799	3555767	969	*
1	3610562	3612008	1447	*
1	3618794	3619418	625	*
1	3624118	3625872	1755	*
1	3649718	3650314	597	*
1	3651792	3653151	1360	*
1	3668649	3669404	756	*
1	3671807	3672163	357	*
1	3695624	3695994	371	*
1	3703121	3703710	590	*
1	3727282	3727635	354	*
1	3746657	3747642	986	*
1	3772044	3773254	1211	*
1	3775348	3776272	925	*
1	3795702	3797072	1371	*
1	3801472	3801789	318	*
1	3803950	3804479	530	*
1	3811048	3811756	709	*
1	3856582	3858082	1501	*
1	3869688	3870314	627	*
1	3899646	3901642	1997	*
1	3910613	3911389	777	*
1	4585220	4585575	356	*
1	4650475	4650819	345	*
1	4652598	4653139	542	*
1	5424782	5425255	474	*
1	5509704	5510233	530	*
1	5514566	5514893	328	*
1	5597960	5598525	566	*
1	5745695	5746336	642	*
1	5927948	5928366	419	*
1	5975195	5975681	487	*
1	5991506	5993831	2326	*
1	6001818	6002562	745	*
1	6025152	6026942	1791	*
1	6108840	6109542	703	*
1	6111615	6112036	422	*
1	6127504	6128337	834	*
1	6148147	6149119	973	*
1	6157273	6158317	1045	*
1	6198925	6200143	1219	*
1	6205004	6206953	1950	*
1	6234481	6236380	1900	*
1	6245025	6246193	1169	*
1	6246742	6247066	325	*
1	6259642	6260908	1267	*
1	6260994	6261618	625	*
1	6300101	6301013	913	*
1	6331339	6332080	742	*
1	6342001	6342479	479	*
1	6343306	6344132	827	*
1	6353827	6354588	762	*
1	6363060	6363582	523	*
1	6392584	6394242	1659	*
1	6404677	6404993	317	*
1	6414289	6414740	452	*
1	6419581	6420384	804	*
1	6422839	6423164	326	*
1	6427374	6428301	928	*
1	6437029	6437606	578	*
1	6438033	6438422	390	*
1	6440291	6440900	610	*
1	6448212	6449484	1273	*
1	6464358	6465025	668	*
1	6475347	6476096	750	*
1	6486472	6486791	320	*
1	6488966	6489693	728	*
1	6489901	6491875	1975	*
1	6497349	6497883	535	*
1	6501890	6502707	818	*
1	6523599	6523968	370	*
1	6553637	6554829	1193	*
1	6578121	6578580	460	*
1	6579508	6581190	1683	*
1	6600870	6603761	2892	*
1	6612704	6614945	2242	*
1	6624665	6626104	1440	*
1	6634494	6635084	591	*
1	6701039	6702310	1272	*
1	6719974	6720331	358	*
1	6724508	6725185	678	*
1	6743537	6744171	635	*
1	6770594	6771236	643	*
1	6784195	6785568	1374	*
1	6785763	6786329	567	*
1	6795287	6796473	1187	*
1	6859784	6860835	1052	*
1	6869358	6869953	596	*
1	6889913	6890420	508	*
1	6935093	6935861	769	*
1	6960293	6960920	628	*
1	6962351	6963916	1566	*
1	6991229	6991865	637	*
1	6998112	6998703	592	*
1	7046288	7046657	370	*
1	7070048	7070841	794	*
1	7117382	7118440	1059	*
1	7121526	7122146	621	*
1	7127428	7128419	992	*
1	7136098	7136892	795	*
1	7223369	7224328	960	*
1	7265694	7266621	928	*
1	7298968	7300298	1331	*
1	7300858	7301859	1002	*
1	7334439	7335947	1509	*
1	7341100	7342077	978	*
1	7379337	7379902	566	*
1	7388746	7390429	1684	*
1	7401748	7402646	899	*
1	7424336	7425138	803	*
1	7469104	7470018	915	*
1	7470700	7472144	1445	*
1	7477071	7477660	590	*
1	7482808	7483191	384	*
1	7519300	7519953	654	*
1	7526370	7527098	729	*
1	7533968	7534671	704	*
1	7539516	7540252	737	*
1	7549211	7550626	1416	*
1	7561301	7561764	464	*
1	7574139	7574976	838	*
1	7645328	7645932	605	*
1	7647023	7647618	596	*
1	7667506	7668109	604	*
1	7669346	7669952	607	*
1	7680062	7680794	733	*
1	7704412	7704988	577	*
1	7752250	7753169	920	*
1	7770856	7772063	1208	*
1	7783175	7784654	1480	*
1	7810402	7810757	356	*
1	7869305	7870075	771	*
1	7893637	7894910	1274	*
1	7902597	7903120	524	*
1	7940727	7941073	347	*
1	7953802	7954678	877	*
1	7961048	7962246	1199	*
1	7975048	7975684	637	*
1	7982150	7982764	615	*
1	8004306	8005684	1379	*
1	8015019	8015369	351	*
1	8017477	8017925	449	*
1	8020024	8020384	361	*
1	8025706	8026807	1102	*
1	8027974	8028614	641	*
1	8040396	8041155	760	*
1	8045988	8046776	789	*
1	8047597	8048484	888	*
1	8055804	8056405	602	*
1	8061186	8062394	1209	*
1	8077056	8077575	520	*
1	8078139	8078715	577	*
1	8091018	8092191	1174	*
1	8097235	8097899	665	*
1	8116561	8117277	717	*
1	8120990	8121889	900	*
1	8133138	8134481	1344	*
1	8137566	8138237	672	*
1	8154620	8155048	429	*
1	8155545	8155953	409	*
1	8174165	8174728	564	*
1	8174836	8175313	478	*
1	8182038	8183064	1027	*
1	8189905	8190257	353	*
1	8197542	8198391	850	*
1	8201342	8201814	473	*
1	8202141	8202884	744	*
1	8204205	8204821	617	*
1	8211663	8212552	890	*
1	8259056	8260219	1164	*
1	8293172	8293527	356	*
1	8314131	8314855	725	*
1	8317923	8318457	535	*
1	8343032	8344169	1138	*
1	8348820	8349340	521	*
1	8374810	8375159	350	*
1	8396883	8397318	436	*
1	8412147	8412773	627	*
1	8423212	8424920	1709	*
1	8438979	8439847	869	*
1	8525276	8526304	1029	*
1	8625950	8627112	1163	*
1	8661290	8662309	1020	*
1	8700987	8701806	820	*
1	8702941	8703830	890	*
1	8706972	8707347	376	*
1	8712145	8713272	1128	*
1	8726388	8727057	670	*
1	8733357	8734029	673	*
1	8816865	8818268	1404	*
1	8822608	8823182	575	*
1	8848660	8849580	921	*
1	8858056	8858458	403	*
1	8873540	8873986	447	*
1	8877912	8879538	1627	*
1	8880111	8880544	434	*
1	8889209	8891018	1810	*
1	8903566	8904590	1025	*
1	8917918	8918467	550	*
1	8939463	8939982	520	*
1	8962735	8963461	727	*
1	8973967	8974493	527	*
1	8986009	8986717	709	*
1	9004892	9005539	648	*
1	9067187	9067601	415	*
1	9078645	9079361	717	*
1	9080483	9081308	826	*
1	9084761	9085568	808	*
1	9086062	9086462	401	*
1	9101551	9101916	366	*
1	9110525	9111419	895	*
1	9127693	9129973	2281	*
1	9144992	9145618	627	*
1	9162886	9164605	1720	*
1	9181097	9181851	755	*
1	9181911	9183128	1218	*
1	9201504	9202203	700	*
1	9234154	9235455	1302	*
1	9266921	9267646	726	*
1	9270393	9270999	607	*
1	9275324	9276059	736	*
1	9280374	9280980	607	*
1	9290053	9290832	780	*
1	9291941	9294035	2095	*
1	9299954	9300693	740	*
1	9302746	9303581	836	*
1	9315469	9316491	1023	*
1	9317630	9318235	606	*
1	9321238	9321949	712	*
1	9350170	9351008	839	*
1	9376509	9377456	948	*
1	9384537	9385333	797	*
1	9388435	9389306	872	*
1	9398011	9398439	429	*
1	9400363	9401035	673	*
1	9401747	9402303	557	*
1	9412858	9414124	1267	*
1	9428594	9429626	1033	*
1	9438569	9439193	625	*
1	9455794	9456290	497	*
1	9472834	9473619	786	*
1	9490872	9491428	557	*
1	9494988	9495752	765	*
1	9539094	9540467	1374	*
1	9561300	9561874	575	*
1	9588277	9590155	1879	*
1	9615422	9615946	525	*
1	9626771	9627585	815	*
1	9644712	9645073	362	*
1	9687289	9688108	820	*
1	9688975	9690162	1188	*
1	9700270	9700746	477	*
1	9702268	9702570	303	*
1	9718871	9719787	917	*
1	9724835	9725362	528	*
1	9792225	9792895	671	*
1	9798191	9798845	655	*
1	9822904	9824858	1955	*
1	9825081	9825998	918	*
1	9842549	9843810	1262	*
1	9867160	9868048	889	*
1	9874889	9875482	594	*
1	9877922	9878410	489	*
1	9881786	9882255	470	*
1	9890211	9890919	709	*
1	9893129	9893606	478	*
1	9909344	9911273	1930	*
1	9942430	9943888	1459	*
1	9950272	9950835	564	*
1	9960899	9961609	711	*
1	9996921	9998151	1231	*
1	10032435	10033829	1395	*
1	10055710	10056144	435	*
1	10074087	10074773	687	*
1	10107950	10108753	804	*
1	10122844	10123458	615	*
1	10195571	10195995	425	*
1	10209772	10212069	2298	*
1	10377334	10377958	625	*
1	10387377	10388663	1287	*
1	10398370	10399964	1595	*
1	10415185	10415740	556	*
1	10430065	10431319	1255	*
1	10459086	10459613	528	*
1	10471805	10472828	1024	*
1	10474716	10475700	985	*
1	10494489	10495313	825	*
1	10507318	10507873	556	*
1	10510463	10511233	771	*
1	10528045	10529450	1406	*
1	10537223	10537786	564	*
1	10575595	10576004	410	*
1	10599101	10599957	857	*
1	10634699	10635977	1279	*
1	10646398	10646659	262	*
1	10693679	10695304	1626	*
1	10724067	10724676	610	*
1	10727684	10728320	637	*
1	10731037	10731421	385	*
1	10755763	10756409	647	*
1	10779032	10779627	596	*
1	10788542	10789083	542	*
1	10795907	10796916	1010	*
1	10804052	10804874	823	*
1	10824788	10825295	508	*
1	10830984	10831538	555	*
1	10835887	10836292	406	*
1	10837177	10837762	586	*
1	10866682	10867660	979	*
1	10898001	10898660	660	*
1	10900230	10901912	1683	*
1	10909936	10910454	519	*
1	10944005	10944681	677	*
1	10960863	10961552	690	*
1	10965585	10966236	652	*
1	10975598	10976309	712	*
1	10980019	10980508	490	*
1	10990099	10990653	555	*
1	11011818	11013426	1609	*
1	11037603	11038146	544	*
1	11046202	11046550	349	*
1	11059003	11060613	1611	*
1	11099114	11100205	1092	*
1	11133999	11135232	1234	*
1	11158355	11159202	848	*
1	11178012	11178954	943	*
1	11180138	11180922	785	*
1	11241686	11242288	603	*
1	11261996	11263034	1039	*
1	11272604	11274133	1530	*
1	11281404	11282618	1215	*
1	11292515	11293265	751	*
1	11293849	11294228	380	*
1	11337489	11337845	357	*
1	11478467	11479665	1199	*
1	11550689	11551029	341	*
1	11635868	11636326	459	*
1	11642255	11642749	495	*
1	11645734	11646234	501	*
1	11653077	11653753	677	*
1	11654293	11655203	911	*
1	11663847	11664713	867	*
1	11680376	11681892	1517	*
1	11692782	11693728	947	*
1	11719430	11720165	736	*
1	11733354	11733737	384	*
1	11735696	11737540	1845	*
1	11748869	11749526	658	*
1	11784939	11785641	703	*
1	11787374	11788137	764	*
1	11790688	11791519	832	*
1	11803045	11803893	849	*
1	11804822	11806572	1751	*
1	11821343	11822102	760	*
1	11838202	11839009	808	*
1	11859097	11859624	528	*
1	11882937	11883250	314	*
1	11893808	11894284	477	*
1	11901426	11901896	471	*
1	11908081	11909965	1885	*
1	11918644	11919472	829	*
1	11926235	11926787	553	*
1	11929886	11930159	274	*
1	11934206	11935247	1042	*
1	11938987	11939647	661	*
1	11940583	11940946	364	*
1	11961254	11961644	391	*
1	11966811	11967548	738	*
1	11979556	11980924	1369	*
1	12001860	12002570	711	*
1	12018986	12020507	1522	*
1	12030897	12031641	745	*
1	12040384	12041137	754	*
1	12044171	12044631	461	*
1	12051789	12052599	811	*
1	12075586	12076086	501	*
1	12132037	12132732	696	*
1	12132864	12133569	706	*
1	12135539	12135995	457	*
1	12143355	12144393	1039	*
1	12153081	12153839	759	*
1	12161571	12162483	913	*
1	12166823	12167362	540	*
1	12208539	12209438	900	*
1	12229633	12231437	1805	*
1	12272067	12272409	343	*
1	12454018	12455486	1469	*
1	12477881	12478938	1058	*
1	12480745	12481260	516	*
1	12518764	12519760	997	*
1	12525386	12525750	365	*
1	12528201	12528899	699	*
1	12539800	12540884	1085	*
1	12541417	12541954	538	*
1	12548679	12550360	1682	*
1	12556357	12556894	538	*
1	12572581	12574597	2017	*
1	12579980	12580714	735	*
1	12588110	12588789	680	*
1	12595155	12596861	1707	*
1	12601803	12602546	744	*
1	12603798	12604786	989	*
1	12615930	12616878	949	*
1	12617936	12619676	1741	*
1	12636219	12637237	1019	*
1	12658957	12659518	562	*
1	12760433	12760925	493	*
1	12810641	12811209	569	*
1	12851725	12852266	542	*
1	13661516	13661847	332	*
1	13665695	13666042	348	*
1	13699650	13700730	1081	*
1	13748790	13750169	1380	*
1	13766680	13767480	801	*
1	13828694	13829367	674	*
1	13960407	13960891	485	*
1	13965624	13966322	699	*
1	13996309	13996754	446	*
1	14055366	14056187	822	*
1	14095038	14095480	443	*
1	14108756	14109526	771	*
1	14113160	14113789	630	*
1	14140705	14141470	766	*
1	14142434	14142735	302	*
1	14149439	14149764	326	*
1	14190462	14190996	535	*
1	14254176	14254733	558	*
1	14282598	14283297	700	*
1	14291057	14291748	692	*
1	14296750	14297124	375	*
1	14320469	14320967	499	*
1	14332148	14332816	669	*
1	14339875	14340863	989	*
1	14345987	14346789	803	*
1	14360928	14361432	505	*
1	14366247	14366856	610	*
1	14390541	14391223	683	*
1	14413760	14414319	560	*
1	14443253	14443842	590	*
1	14486276	14487297	1022	*
1	14517060	14517994	935	*
1	14522408	14523405	998	*
1	14542829	14543752	924	*
1	14553650	14554344	695	*
1	14598003	14598547	545	*
1	14625734	14626272	539	*
1	14653358	14654166	809	*
1	14742071	14742948	878	*
1	14765538	14766474	937	*
1	14789649	14790155	507	*
1	14810649	14811464	816	*
1	14814996	14815892	897	*
1	14822389	14822973	585	*
1	14826105	14826573	469	*
1	14894779	14895402	624	*
1	14910964	14911794	831	*
1	14923711	14925286	1576	*
1	14929342	14930261	920	*
1	14945191	14946017	827	*
1	14946751	14947611	861	*
1	14954054	14954625	572	*
1	14968238	14969074	837	*
1	14970193	14970549	357	*
1	14977245	14977794	550	*
1	14987903	14988684	782	*
1	14995989	14997071	1083	*
1	15003129	15003821	693	*
1	15014312	15014962	651	*
1	15027554	15028536	983	*
1	15046396	15047031	636	*
1	15056747	15057247	501	*
1	15089274	15089880	607	*
1	15090294	15090767	474	*
1	15100231	15100894	664	*
1	15128517	15128911	395	*
1	15152347	15154362	2016	*
1	15178730	15179541	812	*
1	15200356	15201118	763	*
1	15246985	15247793	809	*
1	15261225	15261809	585	*
1	15272356	15272906	551	*
1	15304688	15305236	549	*
1	15323154	15324265	1112	*
1	15337402	15338431	1030	*
1	15352327	15352812	486	*
1	15356055	15357277	1223	*
1	15409359	15410718	1360	*
1	15415979	15416663	685	*
1	15417550	15417826	277	*
1	15426793	15427166	374	*
1	15431168	15431544	377	*
1	15459682	15460332	651	*
1	15501440	15501930	491	*
1	15523899	15525536	1638	*
1	15526407	15527308	902	*
1	15584335	15585384	1050	*
1	15603034	15604011	978	*
1	15616756	15618254	1499	*
1	15678585	15678943	359	*
1	15680712	15681573	862	*
1	15684095	15684439	345	*
1	15741188	15741890	703	*
1	15758541	15759629	1089	*
1	15786569	15787243	675	*
1	15788093	15788591	499	*
1	15795102	15795520	419	*
1	15796616	15797217	602	*
1	15799039	15801454	2416	*
1	15815402	15816046	645	*
1	15825386	15826209	824	*
1	15833141	15833625	485	*
1	15834308	15836424	2117	*
1	15847145	15848883	1739	*
1	15849259	15850284	1026	*
1	15865828	15866256	429	*
1	15885752	15886842	1091	*
1	15916465	15916760	296	*
1	15919339	15919711	373	*
1	15923324	15923622	299	*
1	15924554	15925252	699	*
1	15949066	15950307	1242	*
1	15952417	15953072	656	*
1	15975271	15976339	1069	*
1	15994380	15994907	528	*
1	16006895	16007453	559	*
1	16012642	16013754	1113	*
1	16015993	16016621	629	*
1	16032475	16033331	857	*
1	16038414	16038869	456	*
1	16048545	16049124	580	*
1	16055584	16056491	908	*
1	16068380	16068781	402	*
1	16075981	16077284	1304	*
1	16078947	16079442	496	*
1	16082366	16082835	470	*
1	16112804	16113512	709	*
1	16122508	16123294	787	*
1	16139338	16140168	831	*
1	16143563	16144335	773	*
1	16144950	16147242	2293	*
1	16154708	16155368	661	*
1	16155518	16156445	928	*
1	16164172	16164743	572	*
1	16167353	16168151	799	*
1	16172985	16173972	988	*
1	16174194	16174696	503	*
1	16175546	16176594	1049	*
1	16181606	16182602	997	*
1	16187628	16188208	581	*
1	16188957	16189380	424	*
1	16206180	16207334	1155	*
1	16217014	16217985	972	*
1	16236090	16237695	1606	*
1	16244395	16244735	341	*
1	16248651	16249130	480	*
1	16249888	16250252	365	*
1	16254042	16255003	962	*
1	16324379	16324833	455	*
1	16351585	16353149	1565	*
1	16366901	16368115	1215	*
1	16375290	16376291	1002	*
1	16383781	16384263	483	*
1	16386122	16387265	1144	*
1	16440158	16441581	1424	*
1	16498661	16500220	1560	*
1	16513423	16514590	1168	*
1	16534671	16535781	1111	*
1	16612528	16614045	1518	*
1	16620870	16621395	526	*
1	16623894	16624553	660	*
1	16643654	16645204	1551	*
1	16677855	16678449	595	*
1	16707241	16708098	858	*
1	16709754	16710115	362	*
1	16727190	16728074	885	*
1	16770284	16770664	381	*
1	16861772	16862130	359	*
1	16872531	16873331	801	*
1	16888772	16889960	1189	*
1	16895353	16897053	1701	*
1	16903787	16905787	2001	*
1	16913549	16914707	1159	*
1	16948127	16949364	1238	*
1	16951667	16952029	363	*
1	16960565	16961370	806	*
1	16966833	16967969	1137	*
1	16971778	16972331	554	*
1	16979844	16981184	1341	*
1	17003628	17004576	949	*
1	17010671	17012340	1670	*
1	17015944	17016566	623	*
1	17027403	17028156	754	*
1	17053685	17054735	1051	*
1	17059490	17060179	690	*
1	17075450	17075965	516	*
1	17113646	17114429	784	*
1	17119248	17119692	445	*
1	17121140	17121729	590	*
1	17122489	17122732	244	*
1	17125736	17126272	537	*
1	17128283	17129045	763	*
1	17162758	17163369	612	*
1	17167961	17168879	919	*
1	17169393	17169752	360	*
1	17186293	17186646	354	*
1	17189752	17190725	974	*
1	17191230	17191730	501	*
1	17207687	17208441	755	*
1	17211945	17213188	1244	*
1	17226305	17226845	541	*
1	17232922	17234195	1274	*
1	17236858	17237637	780	*
1	17250396	17251182	787	*
1	17251422	17252250	829	*
1	17259155	17259716	562	*
1	17276452	17277158	707	*
1	17287253	17287880	628	*
1	17289618	17290321	704	*
1	17304158	17304846	689	*
1	17335876	17336587	712	*
1	17340372	17340763	392	*
1	17348044	17348728	685	*
1	17405901	17406655	755	*
1	17437685	17439030	1346	*
1	17439644	17440143	500	*
1	17460073	17460993	921	*
1	17475708	17476337	630	*
1	17487854	17488141	288	*
1	17494101	17494789	689	*
1	17502172	17502834	663	*
1	17527381	17527895	515	*
1	17531515	17532579	1065	*
1	17539575	17540944	1370	*
1	17551002	17551594	593	*
1	17551668	17552378	711	*
1	17561231	17562079	849	*
1	17563953	17564281	329	*
1	17564397	17564991	595	*
1	17569121	17570306	1186	*
1	17587594	17588841	1248	*
1	17606731	17607283	553	*
1	17624147	17625437	1291	*
1	17653706	17654265	560	*
1	17661580	17662014	435	*
1	17696414	17696854	441	*
1	17765526	17766410	885	*
1	17768419	17769351	933	*
1	17825827	17826564	738	*
1	17866162	17866930	769	*
1	17874024	17874908	885	*
1	18021991	18022649	659	*
1	18091836	18092422	587	*
1	18480330	18481159	830	*
1	18597241	18597921	681	*
1	18618485	18619193	709	*
1	18668794	18669252	459	*
1	18681377	18681709	333	*
1	18820570	18821164	595	*
1	18875053	18875641	589	*
1	18884154	18884483	330	*
1	18901985	18903318	1334	*
1	18912974	18913508	535	*
1	18922213	18922971	759	*
1	18926311	18927007	697	*
1	18941049	18942077	1029	*
1	18949383	18950343	961	*
1	18955519	18957285	1767	*
1	18965684	18966134	451	*
1	19009769	19011564	1796	*
1	19033860	19034545	686	*
1	19045277	19045826	550	*
1	19054271	19054642	372	*
1	19066833	19067841	1009	*
1	19096268	19096565	298	*
1	19203369	19203877	509	*
1	19209496	19211131	1636	*
1	19241292	19241774	483	*
1	19251113	19252528	1416	*
1	19288338	19289317	980	*
1	19311125	19313087	1963	*
1	19344378	19344748	371	*
1	19430164	19430630	467	*
1	19440463	19440914	452	*
1	19450593	19451485	893	*
1	19469430	19469913	484	*
1	19484393	19486315	1923	*
1	19582274	19582610	337	*
1	19596366	19597811	1446	*
1	19622169	19622556	388	*
1	19635700	19636158	459	*
1	19640102	19641162	1061	*
1	19643151	19644415	1265	*
1	19650938	19651539	602	*
1	19653516	19654160	645	*
1	19659609	19660157	549	*
1	19676531	19676914	384	*
1	19704391	19705065	675	*
1	19715381	19716143	763	*
1	19754445	19754909	465	*
1	19757972	19758898	927	*
1	19765421	19766042	622	*
1	19799177	19800599	1423	*
1	19860988	19861614	627	*
1	19863724	19864334	611	*
1	19866602	19867310	709	*
1	19881983	19883167	1185	*
1	19918022	19918331	310	*
1	19949039	19949341	303	*
1	20100802	20101293	492	*
1	20124444	20125020	577	*
1	20152012	20152731	720	*
1	20195186	20195511	326	*
1	20212963	20213393	431	*
1	20279479	20279934	456	*
1	20358691	20359272	582	*
1	20367060	20367447	388	*
1	20376896	20377254	359	*
1	20411119	20411771	653	*
1	20440795	20441137	343	*
1	20476213	20476863	651	*
1	20485453	20487036	1584	*
1	20493770	20494662	893	*
1	20494731	20495337	607	*
1	20507376	20508464	1089	*
1	20522324	20522874	551	*
1	20530898	20531561	664	*
1	20552330	20552655	326	*
1	20575131	20576948	1818	*
1	20588580	20590230	1651	*
1	20601153	20602180	1028	*
1	20604138	20604825	688	*
1	20612049	20612797	749	*
1	20613428	20614293	866	*
1	20633263	20635029	1767	*
1	20640003	20640553	551	*
1	20661063	20662127	1065	*
1	20696264	20697424	1161	*
1	20702487	20702904	418	*
1	20717490	20718417	928	*
1	20732017	20733739	1723	*
1	20786069	20788274	2206	*
1	20847317	20848873	1557	*
1	20896657	20897362	706	*
1	21022132	21022918	787	*
1	21043273	21043865	593	*
1	21063855	21064574	720	*
1	21083094	21083670	577	*
1	21091095	21091454	360	*
1	21149444	21150483	1040	*
1	21175691	21177404	1714	*
1	21194937	21195744	808	*
1	21231988	21232542	555	*
1	21255105	21255753	649	*
1	21261593	21263142	1550	*
1	21268197	21268942	746	*
1	21289488	21290829	1342	*
1	21294334	21295286	953	*
1	21302543	21303515	973	*
1	21308435	21309661	1227	*
1	21311139	21311423	285	*
1	21316963	21317913	951	*
1	21318619	21319087	469	*
1	21324145	21325165	1021	*
1	21331859	21332642	784	*
1	21335763	21336226	464	*
1	21337861	21339571	1711	*
1	21344591	21346069	1479	*
1	21355919	21356447	529	*
1	21368230	21369191	962	*
1	21370579	21370917	339	*
1	21439715	21440506	792	*
1	21490731	21491185	455	*
1	21508868	21509520	653	*
1	21537884	21538686	803	*
1	21539913	21540364	452	*
1	21573965	21575164	1200	*
1	21586647	21587549	903	*
1	21607520	21608375	856	*
1	21626784	21627415	632	*
1	21631885	21632619	735	*
1	21638395	21639974	1580	*
1	21651160	21652064	905	*
1	21659091	21659754	664	*
1	21703184	21703979	796	*
1	21764392	21765607	1216	*
1	21781988	21784062	2075	*
1	21801081	21801468	388	*
1	21818724	21819051	328	*
1	21861954	21862572	619	*
1	21869555	21870483	929	*
1	21909269	21910430	1162	*
1	21920128	21921360	1233	*
1	21927500	21927918	419	*
1	21930943	21931978	1036	*
1	21935843	21937784	1942	*
1	21942886	21943492	607	*
1	21956366	21957455	1090	*
1	21963838	21964347	510	*
1	22005093	22005959	867	*
1	22019009	22019547	539	*
1	22025005	22026349	1345	*
1	22039622	22040472	851	*
1	22052305	22053835	1531	*
1	22131770	22133024	1255	*
1	22142265	22142954	690	*
1	22143006	22143931	926	*
1	22275696	22276427	732	*
1	22317279	22317736	458	*
1	22332803	22333516	714	*
1	22341959	22342601	643	*
1	22388655	22389944	1290	*
1	22414171	22414857	687	*
1	22416554	22416917	364	*
1	22420316	22420838	523	*
1	22428575	22429452	878	*
1	22447618	22447911	294	*
1	22451592	22452899	1308	*
1	22600410	22601162	753	*
1	22641856	22642547	692	*
1	22673998	22674472	475	*
1	22689454	22689950	497	*
1	22704298	22704880	583	*
1	22739505	22740298	794	*
1	22745967	22746581	615	*
1	22750120	22750996	877	*
1	22780731	22781085	355	*
1	22831765	22832673	909	*
1	22870272	22870991	720	*
1	22930173	22930721	549	*
1	22964186	22964545	360	*
1	22969268	22969845	578	*
1	22976372	22977024	653	*
1	23010444	23011309	866	*
1	23018995	23020423	1429	*
1	23100075	23100554	480	*
1	23167316	23169077	1762	*
1	23177389	23178198	810	*
1	23188324	23189414	1091	*
1	23194397	23195307	911	*
1	23196688	23197436	749	*
1	23198229	23198781	553	*
1	23210279	23210796	518	*
1	23216711	23217890	1180	*
1	23224669	23225569	901	*
1	23273282	23273975	694	*
1	23282785	23283392	608	*
1	23283806	23284269	464	*
1	23343289	23345144	1856	*
1	23367562	23369986	2425	*
1	23377196	23377796	601	*
1	23402888	23403317	430	*
1	23403581	23404401	821	*
1	23411573	23412174	602	*
1	23423547	23425138	1592	*
1	23451571	23452623	1053	*
1	23475319	23475668	350	*
1	23478782	23479388	607	*
1	23483314	23484951	1638	*
1	23496882	23497708	827	*
1	23528089	23528919	831	*
1	23530513	23531773	1261	*
1	23539577	23540333	757	*
1	23544674	23545268	595	*
1	23554496	23555317	822	*
1	23555888	23557251	1364	*
1	23559096	23559811	716	*
1	23562108	23562649	542	*
1	23567765	23568644	880	*
1	23568749	23569348	600	*
1	23576587	23577933	1347	*
1	23585314	23586227	914	*
1	23586573	23587078	506	*
1	23591440	23592133	694	*
1	23593321	23594146	826	*
1	23619330	23620083	754	*
1	23634642	23635861	1220	*
1	23637369	23637793	425	*
1	23651015	23651730	716	*
1	23657639	23658018	380	*
1	23691444	23692416	973	*
1	23718505	23718844	340	*
1	23742927	23744267	1341	*
1	23751141	23751629	489	*
1	23771832	23772624	793	*
1	23777809	23778846	1038	*
1	23779783	23780386	604	*
1	23790109	23790660	552	*
1	23790729	23791484	756	*
1	23791561	23792077	517	*
1	23799323	23801289	1967	*
1	23809675	23810193	519	*
1	23824846	23825819	974	*
1	23838126	23838883	758	*
1	23867642	23868836	1195	*
1	23907640	23908347	708	*
1	23916757	23917301	545	*
1	23919830	23920526	697	*
1	23951473	23952254	782	*
1	23958938	23960256	1319	*
1	23979774	23981091	1318	*
1	24003289	24003937	649	*
1	24008399	24008934	536	*
1	24009075	24010062	988	*
1	24018555	24019401	847	*
1	24022451	24023208	758	*
1	24027938	24028454	517	*
1	24045843	24047487	1645	*
1	24048431	24049002	572	*
1	24070803	24071402	600	*
1	24102948	24103378	431	*
1	24107828	24108541	714	*
1	24108598	24109287	690	*
1	24112379	24112898	520	*
1	24117629	24118160	532	*
1	24119773	24120814	1042	*
1	24142411	24143447	1037	*
1	24149677	24150973	1297	*
1	24186982	24187890	909	*
1	24191929	24192356	428	*
1	24201886	24202610	725	*
1	24236212	24237196	985	*
1	24266208	24267299	1092	*
1	24283462	24284433	972	*
1	24289721	24290519	799	*
1	24294268	24295469	1202	*
1	24321532	24322684	1153	*
1	24352004	24352750	747	*
1	24362916	24363388	473	*
1	24364533	24365836	1304	*
1	24391310	24391611	302	*
1	24392164	24392648	485	*
1	24413294	24413973	680	*
1	24415239	24416340	1102	*
1	24502117	24503441	1325	*
1	24515407	24516206	800	*
1	24541044	24541321	278	*
1	24559045	24559721	677	*
1	24587214	24587556	343	*
1	24635197	24635587	391	*
1	24642176	24644302	2127	*
1	24683500	24684255	756	*
1	24688580	24689169	590	*
1	24705110	24705976	867	*
1	24713016	24713833	818	*
1	24744803	24746110	1308	*
1	24769912	24770600	689	*
1	24793651	24794312	662	*
1	24830538	24831036	499	*
1	24847756	24848852	1097	*
1	24862064	24862989	926	*
1	24897957	24898449	493	*
1	24929097	24930760	1664	*
1	24932203	24932617	415	*
1	24949185	24949926	742	*
1	25017350	25018000	651	*
1	25022103	25023301	1199	*
1	25031725	25032740	1016	*
1	25101438	25101880	443	*
1	25182580	25183033	454	*
1	25231996	25232976	981	*
1	25233030	25233522	493	*
1	25239544	25240510	967	*
1	25246513	25248142	1630	*
1	25267691	25268373	683	*
1	25338027	25339041	1015	*
1	25352148	25352638	491	*
1	25371422	25372271	850	*
1	25429883	25431617	1735	*
1	25503837	25504128	292	*
1	25506692	25507288	597	*
1	25523555	25523892	338	*
1	25543266	25544254	989	*
1	25544453	25545118	666	*
1	25549265	25550360	1096	*
1	25556416	25557309	894	*
1	25568329	25569294	966	*
1	25573345	25573923	579	*
1	25608456	25608919	464	*
1	25615917	25617245	1329	*
1	25629730	25630364	635	*
1	25688382	25689251	870	*
1	25694914	25695483	570	*
1	25695942	25696309	368	*
1	25727570	25728025	456	*
1	25743402	25744624	1223	*
1	25796943	25797167	225	*
1	25799744	25800866	1123	*
1	25810427	25811382	956	*
1	25819420	25821130	1711	*
1	25858610	25859891	1282	*
1	25874783	25876247	1465	*
1	25890330	25890886	557	*
1	25892220	25892928	709	*
1	25895376	25895803	428	*
1	25905379	25907173	1795	*
1	25922667	25923481	815	*
1	25997207	25998724	1518	*
1	26034933	26036733	1801	*
1	26094706	26095232	527	*
1	26097553	26098086	534	*
1	26110671	26112691	2021	*
1	26123210	26123795	586	*
1	26145047	26145665	619	*
1	26161576	26162364	789	*
1	26169537	26170701	1165	*
1	26177102	26177721	620	*
1	26190268	26190728	461	*
1	26218928	26219668	741	*
1	26233631	26235053	1423	*
1	26275972	26276561	590	*
1	26279611	26280704	1094	*
1	26284732	26285332	601	*
1	26306214	26307170	957	*
1	26321123	26322084	962	*
1	26336011	26337147	1137	*
1	26357130	26357609	480	*
1	26358761	26359166	406	*
1	26363839	26364133	295	*
1	26377924	26378877	954	*
1	26387131	26387759	629	*
1	26391486	26391913	428	*
1	26404971	26405813	843	*
1	26416935	26417421	487	*
1	26431829	26432907	1079	*
1	26471429	26473352	1924	*
1	26500028	26501756	1729	*
1	26529440	26531823	2384	*
1	26620085	26621733	1649	*
1	26636479	26637199	721	*
1	26677310	26678066	757	*
1	26692234	26693384	1151	*
1	26695312	26696472	1161	*
1	26696863	26698494	1632	*
1	26705402	26706348	947	*
1	26723200	26724043	844	*
1	26771325	26772303	979	*
1	26787303	26788787	1485	*
1	26788898	26789470	573	*
1	26799523	26800400	878	*
1	26810047	26810425	379	*
1	26826124	26827595	1472	*
1	26848828	26849877	1050	*
1	26853106	26853469	364	*
1	26862838	26863671	834	*
1	26863853	26865680	1828	*
1	26877815	26878312	498	*
1	26889575	26890701	1127	*
1	26899782	26900781	1000	*
1	26907205	26908086	882	*
1	26921248	26922438	1191	*
1	26966865	26967434	570	*
1	26993238	26994472	1235	*
1	26997686	26998141	456	*
1	26998903	27000045	1143	*
1	27009403	27010256	854	*
1	27010810	27011402	593	*
1	27012671	27013442	772	*
1	27031267	27032020	754	*
1	27044510	27045096	587	*
1	27045913	27046174	262	*
1	27074139	27074696	558	*
1	27097419	27097731	313	*
1	27098977	27100209	1233	*
1	27111798	27112607	810	*
1	27122447	27123128	682	*
1	27141611	27142069	459	*
1	27154567	27155719	1153	*
1	27192039	27193104	1066	*
1	27197866	27198442	577	*
1	27233968	27235757	1790	*
1	27284533	27285053	521	*
1	27296719	27297053	335	*
1	27300608	27301331	724	*
1	27306663	27307419	757	*
1	27321828	27322924	1097	*
1	27332621	27333251	631	*
1	27349191	27350323	1133	*
1	27365345	27367369	2025	*
1	27380673	27381518	846	*
1	27392130	27393050	921	*
1	27395497	27395787	291	*
1	27416554	27416988	435	*
1	27436544	27436916	373	*
1	27489595	27490932	1338	*
1	27504204	27505431	1228	*
1	27525536	27526222	687	*
1	27528063	27529449	1387	*
1	27538805	27539077	273	*
1	27540033	27540923	891	*
1	27542200	27543280	1081	*
1	27556779	27558347	1569	*
1	27568144	27569284	1141	*
1	27575182	27576253	1072	*
1	27589740	27590605	866	*
1	27590971	27591604	634	*
1	27601724	27602448	725	*
1	27603426	27604408	983	*
1	27643766	27644236	471	*
1	27650553	27651224	672	*
1	27658852	27660406	1555	*
1	27663141	27663507	367	*
1	27671884	27672827	944	*
1	27686358	27687116	759	*
1	27725384	27726659	1276	*
1	27772784	27773959	1176	*
1	27817146	27817688	543	*
1	27830307	27831513	1207	*
1	27857900	27858738	839	*
1	27872254	27873044	791	*
1	27875134	27875673	540	*
1	27914047	27915061	1015	*
1	27934764	27935430	667	*
1	27959365	27960487	1123	*
1	27968694	27969065	372	*
1	27979653	27980113	461	*
1	28087682	28089164	1483	*
1	28104973	28105553	581	*
1	28153129	28153521	393	*
1	28208905	28209224	320	*
1	28232413	28233163	751	*
1	28235598	28237063	1466	*
1	28247090	28247607	518	*
1	28248240	28249309	1070	*
1	28249424	28249810	387	*
1	28259088	28260790	1703	*
1	28296691	28297233	543	*
1	28313764	28314460	697	*
1	28328654	28329769	1116	*
1	28346013	28346795	783	*
1	28351553	28352490	938	*
1	28359653	28359992	340	*
1	28369360	28370640	1281	*
1	28391791	28392578	788	*
1	28395101	28395689	589	*
1	28409609	28410344	736	*
1	28416454	28416837	384	*
1	28417365	28418031	667	*
1	28437251	28438519	1269	*
1	28449915	28450495	581	*
1	28471495	28471990	496	*
1	28505546	28506724	1179	*
1	28517833	28519322	1490	*
1	28552534	28554032	1499	*
1	28580994	28582483	1490	*
1	28591857	28593180	1324	*
1	28594625	28595313	689	*
1	28601552	28602297	746	*
1	28602825	28603166	342	*
1	28642313	28643702	1390	*
1	28648003	28648454	452	*
1	28648521	28649504	984	*
1	28653905	28654195	291	*
1	28668212	28670040	1829	*
1	28721855	28722280	426	*
1	28736300	28738076	1777	*
1	28784927	28785853	927	*
1	28846067	28846648	582	*
1	28859835	28861123	1289	*
1	28865809	28866508	700	*
1	28877077	28877551	475	*
1	28882057	28882504	448	*
1	28884716	28885358	643	*
1	28886768	28888484	1717	*
1	28914028	28915553	1526	*
1	28972016	28972903	888	*
1	29122018	29123360	1343	*
1	29124203	29125099	897	*
1	29133627	29134535	909	*
1	29181062	29182375	1314	*
1	29197362	29197878	517	*
1	29202626	29203426	801	*
1	29230507	29231376	870	*
1	29236158	29236874	717	*
1	29239124	29239608	485	*
1	29245628	29246346	719	*
1	29257012	29258268	1257	*
1	29271469	29272432	964	*
1	29282957	29283756	800	*
1	29356754	29357019	266	*
1	29453433	29453883	451	*
1	29513329	29513764	436	*
1	29569861	29570755	895	*
1	29584724	29585383	660	*
1	29640083	29640665	583	*
1	29649422	29650286	865	*
1	29697955	29698538	584	*
1	29703598	29703914	317	*
1	29707004	29707307	304	*
1	29708909	29710158	1250	*
1	29793026	29793526	501	*
1	29974313	29974881	569	*
1	30083664	30084486	823	*
1	30111488	30111866	379	*
1	30191066	30191805	740	*
1	30525829	30526586	758	*
1	30618339	30618863	525	*
1	30657590	30658243	654	*
1	30670302	30671032	731	*
1	30700830	30701452	623	*
1	30707964	30708445	482	*
1	30717902	30719623	1722	*
1	30778420	30778716	297	*
1	30779615	30779938	324	*
1	30782352	30782821	470	*
1	30801528	30802248	721	*
1	30807180	30807868	689	*
1	30816306	30817002	697	*
1	30823692	30824968	1277	*
1	30840944	30841413	470	*
1	30854151	30854469	319	*
1	30909910	30910389	480	*
1	30911223	30911817	595	*
1	30929240	30930221	982	*
1	30966694	30967344	651	*
1	31064885	31066217	1333	*
1	31101051	31101518	468	*
1	31111085	31111826	742	*
1	31135740	31136584	845	*
1	31154593	31155887	1295	*
1	31162533	31163050	518	*
1	31170581	31171496	916	*
1	31181464	31182766	1303	*
1	31185720	31185988	269	*
1	31238948	31240181	1234	*
1	31296352	31298036	1685	*
1	31372963	31374080	1118	*
1	31394481	31395254	774	*
1	31412974	31414161	1188	*
1	31422434	31423073	640	*
1	31482766	31483993	1228	*
1	31497515	31498001	487	*
1	31520707	31521369	663	*
1	31523765	31524117	353	*
1	31530844	31531848	1005	*
1	31548632	31550198	1567	*
1	31551107	31551682	576	*
1	31573774	31574642	869	*
1	31575461	31576829	1369	*
1	31577647	31578164	518	*
1	31583891	31584574	684	*
1	31587797	31589280	1484	*
1	31591587	31592188	602	*
1	31593871	31594479	609	*
1	31617950	31618476	527	*
1	31644276	31645468	1193	*
1	31666175	31667035	861	*
1	31669600	31670625	1026	*
1	31689627	31690253	627	*
1	31700630	31702050	1421	*
1	31712440	31713123	684	*
1	31714924	31715884	961	*
1	31736579	31737128	550	*
1	31745250	31747036	1787	*
1	31753710	31754415	706	*
1	31762464	31763410	947	*
1	31769408	31770465	1058	*
1	31775460	31776004	545	*
1	31788125	31789722	1598	*
1	31798075	31799423	1349	*
1	31815734	31816285	552	*
1	31897207	31898264	1058	*
1	31935171	31935450	280	*
1	31937381	31938103	723	*
1	31938175	31938896	722	*
1	31939576	31940287	712	*
1	31944203	31945135	933	*
1	31954412	31955565	1154	*
1	31955982	31956542	561	*
1	31963944	31964680	737	*
1	31977702	31978175	474	*
1	32003439	32003892	454	*
1	32013206	32014974	1769	*
1	32062255	32063180	926	*
1	32066346	32066863	518	*
1	32072350	32073655	1306	*
1	32100964	32101800	837	*
1	32107600	32108948	1349	*
1	32133177	32133942	766	*
1	32142751	32143122	372	*
1	32179243	32180893	1651	*
1	32200222	32201271	1050	*
1	32205163	32206398	1236	*
1	32215430	32216146	717	*
1	32221816	32222910	1095	*
1	32235848	32236586	739	*
1	32240194	32241809	1616	*
1	32246770	32247504	735	*
1	32248002	32248781	780	*
1	32291617	32292978	1362	*
1	32335124	32336596	1473	*
1	32351043	32352429	1387	*
1	32393890	32395298	1409	*
1	32400829	32401502	674	*
1	32413749	32414450	702	*
1	32448334	32449038	705	*
1	32449129	32449638	510	*
1	32454778	32455132	355	*
1	32485488	32486082	595	*
1	32499912	32501273	1362	*
1	32520449	32521124	676	*
1	32539027	32540388	1362	*
1	32611928	32612768	841	*
1	32650221	32651832	1612	*
1	32701473	32704278	2806	*
1	32712168	32712693	526	*
1	32716383	32717364	982	*
1	32724518	32725892	1375	*
1	32741136	32741904	769	*
1	32742048	32742846	799	*
1	32742915	32743664	750	*
1	32759269	32760666	1398	*
1	32760859	32761924	1066	*
1	32769500	32770046	547	*
1	32772922	32773524	603	*
1	32775216	32775945	730	*
1	32789276	32789893	618	*
1	32795430	32796215	786	*
1	32816683	32818626	1944	*
1	32876598	32877007	410	*
1	32878205	32878936	732	*
1	32892824	32893792	969	*
1	32901056	32901851	796	*
1	32933433	32934472	1040	*
1	32948859	32949245	387	*
1	32949572	32950109	538	*
1	32963607	32965152	1546	*
1	32981031	32981821	791	*
1	32988780	32989611	832	*
1	32992293	32993077	785	*
1	33007178	33007936	759	*
1	33036014	33037254	1241	*
1	33050126	33050929	804	*
1	33055160	33055901	742	*
1	33060422	33061346	925	*
1	33067868	33068639	772	*
1	33072547	33073108	562	*
1	33080809	33081491	683	*
1	33086228	33086881	654	*
1	33099037	33099986	950	*
1	33119896	33120239	344	*
1	33126911	33127679	769	*
1	33152795	33153657	863	*
1	33163459	33164081	623	*
1	33180555	33182321	1767	*
1	33218721	33219024	304	*
1	33219684	33220201	518	*
1	33220849	33221523	675	*
1	33244117	33244843	727	*
1	33255392	33256254	863	*
1	33256412	33257379	968	*
1	33295228	33295837	610	*
1	33298496	33299158	663	*
1	33306466	33307585	1120	*
1	33327663	33328312	650	*
1	33346963	33347280	318	*
1	33349105	33350674	1570	*
1	33367565	33368290	726	*
1	33430322	33431472	1151	*
1	33433591	33434093	503	*
1	33442974	33444166	1193	*
1	33455681	33456188	508	*
1	33458580	33458982	403	*
1	33470513	33470932	420	*
1	33472129	33473015	887	*
1	33612729	33613290	562	*
1	33633122	33633691	570	*
1	33634823	33635202	380	*
1	33985606	33986124	519	*
1	34597731	34598254	524	*
1	34626212	34626962	751	*
1	34681471	34681827	357	*
1	34742623	34743123	501	*
1	34755055	34755636	582	*
1	34762587	34764049	1463	*
1	34781000	34782197	1198	*
1	34783503	34783955	453	*
1	34786463	34786819	357	*
1	34814714	34815108	395	*
1	34852595	34853368	774	*
1	34858817	34860227	1411	*
1	34865660	34866894	1235	*
1	34885478	34885947	470	*
1	34984075	34985753	1679	*
1	35031033	35032294	1262	*
1	35047167	35047909	743	*
1	35062872	35063360	489	*
1	35079033	35079957	925	*
1	35122391	35122729	339	*
1	35191866	35193757	1892	*
1	35202118	35202590	473	*
1	35268313	35269694	1382	*
1	35287788	35288351	564	*
1	35450927	35451433	507	*
1	35505782	35506604	823	*
1	35538323	35538845	523	*
1	35556788	35558017	1230	*
1	35564505	35564992	488	*
1	35568892	35569262	371	*
1	35573037	35573837	801	*
1	35641150	35642253	1104	*
1	35707274	35708632	1359	*
1	35717803	35719351	1549	*
1	35726707	35727418	712	*
1	35769165	35770399	1235	*
1	35807421	35809208	1788	*
1	35882771	35884223	1453	*
1	35930209	35931994	1786	*
1	36088432	36089851	1420	*
1	36096764	36097386	623	*
1	36099427	36100346	920	*
1	36133369	36134215	847	*
1	36148949	36150103	1155	*
1	36150437	36151263	827	*
1	36155473	36157381	1909	*
1	36160797	36161472	676	*
1	36187748	36188651	904	*
1	36203394	36204507	1114	*
1	36217675	36218090	416	*
1	36223430	36225297	1868	*
1	36248298	36249116	819	*
1	36266172	36266749	578	*
1	36285455	36285918	464	*
1	36299695	36300403	709	*
1	36305997	36307506	1510	*
1	36322909	36324021	1113	*
1	36342537	36343329	793	*
1	36350705	36352013	1309	*
1	36368989	36369502	514	*
1	36373534	36375180	1647	*
1	36384974	36387176	2203	*
1	36397125	36398201	1077	*
1	36408401	36409131	731	*
1	36420760	36421453	694	*
1	36450013	36451032	1020	*
1	36463509	36464942	1434	*
1	36479727	36480204	478	*
1	36542887	36543371	485	*
1	36553736	36554314	579	*
1	36576076	36576551	476	*
1	36609270	36609599	330	*
1	36650305	36650824	520	*
1	36703715	36704226	512	*
1	37177295	37177629	335	*
1	37434164	37434857	694	*
1	37454675	37455732	1058	*
1	37471368	37472240	873	*
1	37474287	37474809	523	*
1	37476430	37477177	748	*
1	37479624	37480195	572	*
1	37486924	37487699	776	*
1	37498966	37499671	706	*
1	37513893	37515357	1465	*
1	37534276	37534898	623	*
1	37553754	37554632	879	*
1	37595239	37596438	1200	*
1	37603023	37603502	480	*
1	37634493	37634903	411	*
1	37682300	37682911	612	*
1	37689993	37691054	1062	*
1	37691481	37692890	1410	*
1	37752555	37753551	997	*
1	37793586	37794586	1001	*
1	37807514	37809328	1815	*
1	37859009	37860502	1494	*
1	37865421	37865840	420	*
1	37931143	37932261	1119	*
1	37946080	37947326	1247	*
1	37989264	37990594	1331	*
1	37995737	37996853	1117	*
1	37999645	38001017	1373	*
1	38005214	38005945	732	*
1	38012165	38013341	1177	*
1	38029819	38030529	711	*
1	38046672	38047777	1106	*
1	38064098	38064840	743	*
1	38088321	38088793	473	*
1	38114117	38114640	524	*
1	38138341	38139334	994	*
1	38221010	38221628	619	*
1	38489828	38490222	395	*
1	38589009	38589450	442	*
1	38786319	38786950	632	*
1	38818030	38818516	487	*
1	38835096	38835602	507	*
1	38858833	38860486	1654	*
1	38872670	38873976	1307	*
1	38941263	38942257	995	*
1	38973101	38973424	324	*
1	38990682	38992463	1782	*
1	39025872	39027216	1345	*
1	39080977	39082045	1069	*
1	39092322	39092686	365	*
1	39098380	39099144	765	*
1	39104980	39106669	1690	*
1	39130259	39130710	452	*
1	39159118	39159611	494	*
1	39178223	39179406	1184	*
1	39183566	39184382	817	*
1	39191611	39192774	1164	*
1	39204474	39205454	981	*
1	39258474	39259183	710	*
1	39266294	39266588	295	*
1	39378319	39378650	332	*
1	39387348	39387814	467	*
1	39391897	39392391	495	*
1	39395454	39395874	421	*
1	39398301	39399213	913	*
1	39408289	39409781	1493	*
1	39490911	39491980	1070	*
1	39514620	39515135	516	*
1	39538960	39539583	624	*
1	39559122	39560000	879	*
1	39574364	39575224	861	*
1	39575310	39576235	926	*
1	39576373	39577183	811	*
1	39605921	39606754	834	*
1	39609577	39610130	554	*
1	39632674	39633457	784	*
1	39639391	39640171	781	*
1	39653551	39653945	395	*
1	39658079	39658365	287	*
1	39671643	39672279	637	*
1	39690956	39691850	895	*
1	39701536	39702327	792	*
1	39738598	39739719	1122	*
1	39788451	39789715	1265	*
1	39799041	39800272	1232	*
1	39816435	39817190	756	*
1	39845580	39846292	713	*
1	39852084	39852944	861	*
1	39882698	39883873	1176	*
1	39892439	39893626	1188	*
1	39900776	39902580	1805	*
1	39919323	39919933	611	*
1	39934272	39934941	670	*
1	39954838	39956365	1528	*
1	39960393	39960874	482	*
1	39973480	39973849	370	*
1	40015161	40015549	389	*
1	40032327	40032620	294	*
1	40039423	40041281	1859	*
1	40078464	40079012	549	*
1	40084746	40085398	653	*
1	40096735	40097844	1110	*
1	40143857	40144499	643	*
1	40161016	40162108	1093	*
1	40257382	40258734	1353	*
1	40267701	40268282	582	*
1	40315231	40317050	1820	*
1	40338514	40339107	594	*
1	40373361	40374992	1632	*
1	40438378	40438826	449	*
1	40449717	40451259	1543	*
1	40476887	40478055	1169	*
1	40508309	40509472	1164	*
1	40531151	40532241	1091	*
1	40583297	40583802	506	*
1	40612283	40612896	614	*
1	40625101	40625497	397	*
1	40665245	40666133	889	*
1	40668789	40669134	346	*
1	40691340	40692822	1483	*
1	40703253	40703914	662	*
1	40711336	40712046	711	*
1	40774022	40774680	659	*
1	40783312	40783942	631	*
1	40797022	40797472	451	*
1	40802174	40802886	713	*
1	40848509	40849069	561	*
1	40849837	40850415	579	*
1	40861148	40862905	1758	*
1	40875657	40876138	482	*
1	40877627	40878268	642	*
1	40897444	40897920	477	*
1	40898349	40899053	705	*
1	40901838	40902481	644	*
1	40944297	40944760	464	*
1	40952283	40953005	723	*
1	40967409	40968583	1175	*
1	40979217	40981078	1862	*
1	41003315	41004218	904	*
1	41023353	41023938	586	*
1	41101996	41102947	952	*
1	41109228	41110363	1136	*
1	41123017	41123623	607	*
1	41152308	41153289	982	*
1	41241218	41242772	1555	*
1	41268099	41268736	638	*
1	41282539	41283241	703	*
1	41317378	41317787	410	*
1	41322894	41323260	367	*
1	41325798	41326196	399	*
1	41341875	41342506	632	*
1	41360860	41362257	1398	*
1	41371782	41372621	840	*
1	41381090	41383098	2009	*
1	41387685	41388042	358	*
1	41414881	41415316	436	*
1	41418814	41419465	652	*
1	41423443	41424364	922	*
1	41432215	41433599	1385	*
1	41442485	41443329	845	*
1	41448240	41448926	687	*
1	41455604	41456343	740	*
1	41474453	41475392	940	*
1	41476668	41477439	772	*
1	41482197	41483600	1404	*
1	41484220	41485220	1001	*
1	41485631	41485968	338	*
1	41493019	41493714	696	*
1	41496131	41496753	623	*
1	41498539	41499261	723	*
1	41501506	41502166	661	*
1	41514370	41515746	1377	*
1	41515852	41516668	817	*
1	41537783	41538340	558	*
1	41573865	41574655	791	*
1	41618016	41618490	475	*
1	41626056	41627375	1320	*
1	41629622	41630012	391	*
1	41649953	41650480	528	*
1	41661507	41663241	1735	*
1	41670558	41670823	266	*
1	41672077	41672840	764	*
1	41712611	41713240	630	*
1	41713645	41714336	692	*
1	41782900	41783720	821	*
1	41802849	41803199	351	*
1	41812029	41812972	944	*
1	41823329	41823896	568	*
1	41840646	41841190	545	*
1	41862174	41863456	1283	*
1	41870025	41870607	583	*
1	41900477	41901237	761	*
1	41901731	41902672	942	*
1	41917879	41918421	543	*
1	41920655	41921038	384	*
1	41954428	41955043	616	*
1	41955343	41956198	856	*
1	42003407	42003850	444	*
1	42035139	42036445	1307	*
1	42146828	42147265	438	*
1	42165342	42166361	1020	*
1	42172985	42173709	725	*
1	42176991	42177265	275	*
1	42214383	42215128	746	*
1	42334235	42336068	1834	*
1	42344328	42344630	303	*
1	42380253	42381200	948	*
1	42420684	42421465	782	*
1	42439868	42440432	565	*
1	42455849	42457246	1398	*
1	42462772	42463746	975	*
1	42511633	42511934	302	*
1	42657929	42659227	1299	*
1	42681715	42683555	1841	*
1	42735955	42736537	583	*
1	42756832	42757326	495	*
1	42765835	42767800	1966	*
1	42777877	42778243	367	*
1	42816329	42817743	1415	*
1	42845906	42847515	1610	*
1	42913377	42913728	352	*
1	42922990	42923374	385	*
1	42923865	42925221	1357	*
1	42936113	42937582	1470	*
1	42940957	42941475	519	*
1	42941710	42942248	539	*
1	42943117	42943772	656	*
1	42957729	42959464	1736	*
1	42962602	42963024	423	*
1	42967022	42967654	633	*
1	43008149	43009074	926	*
1	43021569	43022201	633	*
1	43048705	43049375	671	*
1	43073470	43074033	564	*
1	43119890	43120609	720	*
1	43147491	43148088	598	*
1	43171745	43172976	1232	*
1	43206530	43207836	1307	*
1	43227097	43227771	675	*
1	43238136	43238443	308	*
1	43256639	43257227	589	*
1	43293327	43295020	1694	*
1	43330079	43330621	543	*
1	43348464	43350357	1894	*
1	43358097	43359607	1511	*
1	43366763	43368639	1877	*
1	43373018	43373924	907	*
1	43389341	43390269	929	*
1	43414432	43415158	727	*
1	43452779	43454197	1419	*
1	43454418	43454908	491	*
1	43472455	43473185	731	*
1	43476038	43476523	486	*
1	43523118	43523517	400	*
1	43529240	43529547	308	*
1	43530642	43532142	1501	*
1	43554472	43554763	292	*
1	43557738	43558189	452	*
1	43582036	43582785	750	*
1	43634750	43635100	351	*
1	43649492	43651071	1580	*
1	43706589	43708179	1591	*
1	43763307	43764045	739	*
1	43774403	43774761	359	*
1	43776454	43777052	599	*
1	43783160	43784258	1099	*
1	43821823	43822717	895	*
1	43834896	43835933	1038	*
1	43836360	43837013	654	*
1	43853092	43853972	881	*
1	43858105	43859007	903	*
1	43872252	43872703	452	*
1	43879192	43880101	910	*
1	43884961	43885956	996	*
1	43912473	43913192	720	*
1	43933148	43935153	2006	*
1	43945957	43948016	2060	*
1	43969517	43970351	835	*
1	43974242	43975683	1442	*
1	43979490	43980426	937	*
1	43990921	43992260	1340	*
1	44005495	44006264	770	*
1	44029703	44031825	2123	*
1	44035931	44037289	1359	*
1	44047719	44048566	848	*
1	44048815	44050497	1683	*
1	44089511	44090179	669	*
1	44101111	44102051	941	*
1	44154641	44155551	911	*
1	44213177	44214031	855	*
1	44217753	44218289	537	*
1	44293699	44294438	740	*
1	44325905	44326739	835	*
1	44327585	44328600	1016	*
1	44354730	44355750	1021	*
1	44377980	44378593	614	*
1	44389871	44390869	999	*
1	44404997	44406982	1986	*
1	44423357	44424330	974	*
1	44485098	44486382	1285	*
1	44531837	44532744	908	*
1	44553723	44554294	572	*
1	44568144	44568568	425	*
1	44584110	44584664	555	*
1	44594960	44595679	720	*
1	44617425	44617733	309	*
1	44631407	44632897	1491	*
1	44652629	44653250	622	*
1	44655392	44655892	501	*
1	44673721	44675046	1326	*
1	44707007	44707572	566	*
1	44714962	44715361	400	*
1	44720905	44722361	1457	*
1	44730453	44731523	1071	*
1	44738054	44738968	915	*
1	44739328	44740526	1199	*
1	44775076	44776908	1833	*
1	44786113	44786937	825	*
1	44793472	44794114	643	*
1	44799681	44801103	1423	*
1	44806989	44808778	1790	*
1	44819098	44820763	1666	*
1	44835819	44836350	532	*
1	44842752	44843702	951	*
1	44924749	44925416	668	*
1	44947038	44947877	840	*
1	44968048	44968744	697	*
1	44970269	44970742	474	*
1	44985729	44986931	1203	*
1	45010518	45011725	1208	*
1	45011749	45013069	1321	*
1	45018667	45019132	466	*
1	45172005	45172374	370	*
1	45179663	45180587	925	*
1	45205073	45207058	1986	*
1	45246612	45247203	592	*
1	45265983	45267206	1224	*
1	45303291	45304492	1202	*
1	45326564	45328357	1794	*
1	45329409	45329884	476	*
1	45339490	45341222	1733	*
1	45356257	45356610	354	*
1	45393605	45394470	866	*
1	45410781	45411874	1094	*
1	45441913	45442530	618	*
1	45490543	45491728	1186	*
1	45499555	45500752	1198	*
1	45507922	45509222	1301	*
1	45521187	45523082	1896	*
1	45550395	45551632	1238	*
1	45569688	45570581	894	*
1	45583229	45585181	1953	*
1	45590113	45590715	603	*
1	45686075	45687664	1590	*
1	45688069	45688505	437	*
1	45750079	45751151	1073	*
1	45802641	45804551	1911	*
1	45881584	45882116	533	*
1	45891966	45892877	912	*
1	45954010	45954890	881	*
1	46036896	46037591	696	*
1	46103039	46103540	502	*
1	46132129	46133702	1574	*
1	46134812	46135366	555	*
1	46171136	46172161	1026	*
1	46174408	46175227	820	*
1	46179525	46179842	318	*
1	46183029	46183873	845	*
1	46197833	46199084	1252	*
1	46223315	46224029	715	*
1	46246848	46248660	1813	*
1	46301453	46303442	1990	*
1	46303520	46303962	443	*
1	46333443	46333875	433	*
1	46339312	46341438	2127	*
1	46347857	46348595	739	*
1	46401739	46402601	863	*
1	46406054	46406939	886	*
1	46442272	46443206	935	*
1	46446789	46447171	383	*
1	46477426	46477785	360	*
1	46488994	46490283	1290	*
1	46516661	46517566	906	*
1	46520087	46521036	950	*
1	46522152	46522927	776	*
1	46527871	46528399	529	*
1	46532923	46533709	787	*
1	46535151	46535408	258	*
1	46547835	46548434	600	*
1	46603565	46604620	1056	*
1	46611718	46612186	469	*
1	46616021	46617321	1301	*
1	46622300	46622817	518	*
1	46643177	46643902	726	*
1	46667509	46668791	1283	*
1	46718527	46719826	1300	*
1	46725019	46725599	581	*
1	46747726	46748057	332	*
1	47012992	47013956	965	*
1	47030494	47031873	1380	*
1	47069031	47069752	722	*
1	47175332	47175605	274	*
1	47179042	47179823	782	*
1	47189868	47190743	876	*
1	47253852	47254402	551	*
1	47313370	47314615	1246	*
1	47333295	47334939	1645	*
1	47388573	47389280	708	*
1	47424268	47425004	737	*
1	47436470	47438416	1947	*
1	47449925	47450505	581	*
1	47477947	47478570	624	*
1	47487813	47488381	569	*
1	47507865	47508646	782	*
1	47521102	47521996	895	*
1	47527651	47528011	361	*
1	47534017	47534849	833	*
1	47536646	47537238	593	*
1	47569669	47570243	575	*
1	47650154	47650798	645	*
1	47684666	47685570	905	*
1	47709389	47711055	1667	*
1	47726021	47726610	590	*
1	47738566	47739191	626	*
1	47758197	47759519	1323	*
1	47763485	47764218	734	*
1	47797536	47798234	699	*
[truncated: 66,660 more rows]

## Sheet: 1h Hpx
seqnames	start	end	width	strand
1	778299	779340	1042	*
1	826703	827880	1178	*
1	869588	870252	665	*
1	904249	905175	927	*
1	906762	907273	512	*
1	910698	911543	846	*
1	925520	925864	345	*
1	938179	938889	711	*
1	941597	942367	771	*
1	943105	943487	383	*
1	959108	959724	617	*
1	960366	961406	1041	*
1	965996	967397	1402	*
1	975872	976707	836	*
1	998955	1000957	2003	*
1	1001508	1002135	628	*
1	1013177	1014654	1478	*
1	1019248	1020420	1173	*
1	1021089	1021771	683	*
1	1024650	1025493	844	*
1	1040683	1041030	348	*
1	1058415	1059925	1511	*
1	1063835	1064538	704	*
1	1073801	1074582	782	*
1	1079374	1080599	1226	*
1	1115745	1116895	1151	*
1	1121826	1122594	769	*
1	1133386	1133729	344	*
1	1157362	1158590	1229	*
1	1207995	1208752	758	*
1	1231156	1232561	1406	*
1	1244045	1244685	641	*
1	1258543	1259013	471	*
1	1264772	1265576	805	*
1	1273294	1274732	1439	*
1	1281471	1282445	975	*
1	1290964	1292176	1213	*
1	1305291	1305955	665	*
1	1307822	1308785	964	*
1	1318230	1318645	416	*
1	1324270	1325448	1179	*
1	1330655	1331634	980	*
1	1344662	1346374	1713	*
1	1347687	1348416	730	*
1	1360166	1360964	799	*
1	1374633	1375726	1094	*
1	1398981	1400574	1594	*
1	1406797	1408006	1210	*
1	1431789	1432249	461	*
1	1440742	1441483	742	*
1	1470685	1472127	1443	*
1	1504744	1505812	1069	*
1	1511396	1512466	1071	*
1	1554560	1555253	694	*
1	1574145	1575489	1345	*
1	1586209	1586643	435	*
1	1615088	1616793	1706	*
1	1627273	1629028	1756	*
1	1658672	1659548	877	*
1	1686173	1687036	864	*
1	1692274	1693500	1227	*
1	1723977	1724848	872	*
1	1740946	1741464	519	*
1	1746191	1746620	430	*
1	1758613	1759887	1275	*
1	1777896	1779196	1301	*
1	1782604	1783297	694	*
1	1859064	1859688	625	*
1	1889889	1892001	2113	*
1	1894528	1894917	390	*
1	1906257	1906598	342	*
1	1906699	1907846	1148	*
1	1908479	1909495	1017	*
1	1918873	1920000	1128	*
1	1943839	1944499	661	*
1	1959772	1960536	765	*
1	1968948	1969892	945	*
1	2003457	2004165	709	*
1	2015067	2015600	534	*
1	2044812	2045187	376	*
1	2049523	2050891	1369	*
1	2104344	2105559	1216	*
1	2132855	2133875	1021	*
1	2139855	2140493	639	*
1	2174211	2174790	580	*
1	2189328	2190621	1294	*
1	2194582	2195695	1114	*
1	2199165	2199766	602	*
1	2205091	2205515	425	*
1	2207176	2208878	1703	*
1	2212442	2213423	982	*
1	2227207	2228067	861	*
1	2234280	2235052	773	*
1	2314335	2315058	724	*
1	2322195	2323047	853	*
1	2330768	2331369	602	*
1	2360603	2361470	868	*
1	2372811	2373178	368	*
1	2381518	2382407	890	*
1	2391009	2392348	1340	*
1	2411973	2413644	1672	*
1	2801493	2801963	471	*
1	2821675	2822437	763	*
1	2922058	2922363	306	*
1	3312917	3313602	686	*
1	3319820	3320486	667	*
1	3410167	3410687	521	*
1	3419401	3419809	409	*
1	3453139	3453661	523	*
1	3453920	3455151	1232	*
1	3471205	3472103	899	*
1	3473344	3473985	642	*
1	3481762	3482840	1079	*
1	3491215	3492021	807	*
1	3502976	3503375	400	*
1	3503846	3505120	1275	*
1	3509848	3510990	1143	*
1	3515867	3516779	913	*
1	3530031	3531829	1799	*
1	3542769	3543971	1203	*
1	3547218	3547915	698	*
1	3548024	3548781	758	*
1	3553442	3553715	274	*
1	3554866	3555680	815	*
1	3573344	3573820	477	*
1	3611043	3611944	902	*
1	3618830	3619412	583	*
1	3624187	3625864	1678	*
1	3649729	3650309	581	*
1	3651983	3653046	1064	*
1	3668661	3669377	717	*
1	3671853	3672168	316	*
1	3703122	3703902	781	*
1	3746827	3747644	818	*
1	3772092	3773342	1251	*
1	3775937	3776288	352	*
1	3795727	3797009	1283	*
1	3810887	3811708	822	*
1	3856566	3858039	1474	*
1	3869780	3870254	475	*
1	3899645	3901615	1971	*
1	3910649	3911382	734	*
1	4585253	4585580	328	*
1	4652589	4653123	535	*
1	5424810	5425347	538	*
1	5509744	5510238	495	*
1	5514583	5514892	310	*
1	5745716	5746329	614	*
1	5927956	5928333	378	*
1	5991441	5993615	2175	*
1	6025158	6026698	1541	*
1	6108867	6109528	662	*
1	6111636	6112068	433	*
1	6127517	6128294	778	*
1	6148403	6149054	652	*
1	6157310	6158285	976	*
1	6198906	6200129	1224	*
1	6204995	6206819	1825	*
1	6234504	6236339	1836	*
1	6245050	6246188	1139	*
1	6259766	6261587	1822	*
1	6300138	6300902	765	*
1	6331449	6332042	594	*
1	6343333	6344109	777	*
1	6353813	6354514	702	*
1	6363067	6363522	456	*
1	6392779	6394247	1469	*
1	6404672	6404993	322	*
1	6414232	6414781	550	*
1	6419623	6420337	715	*
1	6422851	6423154	304	*
1	6423265	6423799	535	*
1	6427435	6428292	858	*
1	6437055	6437553	499	*
1	6440296	6440876	581	*
1	6448480	6449178	699	*
1	6464452	6464997	546	*
1	6475345	6476049	705	*
1	6486480	6486804	325	*
1	6489016	6489610	595	*
1	6489915	6491875	1961	*
1	6497291	6497905	615	*
1	6501906	6502630	725	*
1	6523599	6523939	341	*
1	6553675	6554828	1154	*
1	6578118	6578529	412	*
1	6579518	6581157	1640	*
1	6600894	6603710	2817	*
1	6612737	6614950	2214	*
1	6624650	6625980	1331	*
1	6634552	6635093	542	*
1	6701113	6702289	1177	*
1	6724510	6725177	668	*
1	6743471	6744178	708	*
1	6770695	6771172	478	*
1	6784228	6785621	1394	*
1	6785690	6786240	551	*
1	6795307	6796486	1180	*
1	6859774	6860842	1069	*
1	6869414	6869946	533	*
1	6889917	6890332	416	*
1	6935089	6935659	571	*
1	6960303	6960872	570	*
1	6962337	6963777	1441	*
1	6991274	6991851	578	*
1	6998251	6998681	431	*
1	7070185	7070939	755	*
1	7117398	7118433	1036	*
1	7121576	7122185	610	*
1	7127505	7128390	886	*
1	7136024	7136813	790	*
1	7223303	7224267	965	*
1	7265686	7266459	774	*
1	7299226	7300353	1128	*
1	7300861	7301729	869	*
1	7334431	7335938	1508	*
1	7341078	7342096	1019	*
1	7379331	7379907	577	*
1	7380656	7381050	395	*
1	7388803	7390420	1618	*
1	7401748	7402523	776	*
1	7424351	7425178	828	*
1	7469147	7470004	858	*
1	7470709	7472115	1407	*
1	7477131	7477659	529	*
1	7478935	7479278	344	*
1	7482818	7483193	376	*
1	7526389	7526909	521	*
1	7533962	7534669	708	*
1	7539553	7540183	631	*
1	7549192	7550618	1427	*
1	7574157	7574830	674	*
1	7645353	7645910	558	*
1	7647107	7647586	480	*
1	7667488	7668093	606	*
1	7680062	7680766	705	*
1	7704406	7704999	594	*
1	7752502	7753157	656	*
1	7770896	7772080	1185	*
1	7783182	7784620	1439	*
1	7810354	7810763	410	*
1	7869450	7869997	548	*
1	7893663	7894857	1195	*
1	7902702	7903125	424	*
1	7940718	7941094	377	*
1	7953808	7954669	862	*
1	7961049	7962253	1205	*
1	7975105	7975645	541	*
1	7982276	7982744	469	*
1	8004383	8005671	1289	*
1	8015029	8015360	332	*
1	8017509	8018118	610	*
1	8020058	8020345	288	*
1	8025776	8026786	1011	*
1	8027978	8028622	645	*
1	8040424	8041057	634	*
1	8045988	8046420	433	*
1	8047654	8048484	831	*
1	8055886	8056407	522	*
1	8061206	8062374	1169	*
1	8077132	8077576	445	*
1	8078136	8078729	594	*
1	8091551	8092159	609	*
1	8094495	8094848	354	*
1	8097264	8097898	635	*
1	8116563	8117286	724	*
1	8121007	8121771	765	*
1	8133157	8134416	1260	*
1	8137609	8138223	615	*
1	8154667	8155072	406	*
1	8174196	8174725	530	*
1	8174828	8175223	396	*
1	8182053	8182885	833	*
1	8189891	8190269	379	*
1	8197567	8198330	764	*
1	8201325	8201802	478	*
1	8202132	8202887	756	*
1	8204253	8204800	548	*
1	8211685	8212527	843	*
1	8259010	8260129	1120	*
1	8314318	8314828	511	*
1	8317925	8318450	526	*
1	8343111	8344159	1049	*
1	8348859	8349308	450	*
1	8374821	8375145	325	*
1	8396902	8397319	418	*
1	8412184	8412790	607	*
1	8423297	8424773	1477	*
1	8438973	8439802	830	*
1	8525370	8526316	947	*
1	8625932	8627096	1165	*
1	8661496	8662142	647	*
1	8675033	8675367	335	*
1	8701004	8701802	799	*
1	8702932	8703819	888	*
1	8706971	8707353	383	*
1	8712222	8713252	1031	*
1	8733423	8734029	607	*
1	8797230	8797573	344	*
1	8816884	8818233	1350	*
1	8822640	8823139	500	*
1	8848695	8849550	856	*
1	8873542	8873976	435	*
1	8877923	8879551	1629	*
1	8880129	8880498	370	*
1	8889396	8890948	1553	*
1	8903574	8904560	987	*
1	8917884	8918619	736	*
1	8962823	8963399	577	*
1	8973980	8974521	542	*
1	8986019	8986708	690	*
1	9004941	9005459	519	*
1	9067210	9067581	372	*
1	9078666	9079380	715	*
1	9080520	9081293	774	*
1	9084880	9085501	622	*
1	9086064	9086536	473	*
1	9101406	9101916	511	*
1	9110405	9111285	881	*
1	9128003	9129934	1932	*
1	9145243	9145603	361	*
1	9162903	9164513	1611	*
1	9181101	9181832	732	*
1	9181921	9183151	1231	*
1	9201457	9202211	755	*
1	9234218	9235505	1288	*
1	9266933	9267583	651	*
1	9270462	9271021	560	*
1	9275552	9276069	518	*
1	9280373	9280958	586	*
1	9290065	9290493	429	*
1	9291967	9293307	1341	*
1	9299972	9300679	708	*
1	9302760	9303556	797	*
1	9315486	9316500	1015	*
1	9317619	9318279	661	*
1	9321249	9321922	674	*
1	9350218	9350978	761	*
1	9376449	9377351	903	*
1	9384578	9385310	733	*
1	9388484	9389229	746	*
1	9400382	9401011	630	*
1	9401730	9402296	567	*
1	9412964	9414072	1109	*
1	9428600	9429453	854	*
1	9438554	9439138	585	*
1	9455803	9456279	477	*
1	9472816	9473589	774	*
1	9491042	9491426	385	*
1	9495034	9495779	746	*
1	9539087	9540467	1381	*
1	9561468	9561853	386	*
1	9588375	9589797	1423	*
1	9615416	9615911	496	*
1	9626917	9627569	653	*
1	9644695	9645078	384	*
1	9687263	9688102	840	*
1	9688981	9690176	1196	*
1	9700377	9700747	371	*
1	9702290	9702659	370	*
1	9718997	9719726	730	*
1	9724864	9725392	529	*
1	9792270	9792921	652	*
1	9798132	9798816	685	*
1	9822934	9824700	1767	*
1	9825136	9826010	875	*
1	9842817	9843494	678	*
1	9867333	9867913	581	*
1	9872723	9873188	466	*
1	9874911	9875323	413	*
1	9881772	9882220	449	*
1	9890237	9890919	683	*
1	9893138	9893565	428	*
1	9899005	9899242	238	*
1	9909632	9911266	1635	*
1	9942491	9943826	1336	*
1	9950268	9950814	547	*
1	9960911	9961681	771	*
1	10032452	10033854	1403	*
1	10055701	10056128	428	*
1	10074400	10074733	334	*
1	10108027	10108772	746	*
1	10122911	10123459	549	*
1	10195572	10196054	483	*
1	10209791	10211969	2179	*
1	10339839	10340139	301	*
1	10377289	10377901	613	*
1	10387373	10388320	948	*
1	10398379	10399897	1519	*
1	10415193	10415740	548	*
1	10430153	10431328	1176	*
1	10459050	10459601	552	*
1	10471822	10472852	1031	*
1	10474734	10475624	891	*
1	10494456	10495291	836	*
1	10507428	10507826	399	*
1	10510479	10511479	1001	*
1	10528036	10529085	1050	*
1	10537213	10537781	569	*
1	10575676	10575998	323	*
1	10599108	10599937	830	*
1	10634686	10635945	1260	*
1	10644546	10644867	322	*
1	10646382	10646673	292	*
1	10694326	10695282	957	*
1	10724042	10724587	546	*
1	10730976	10731428	453	*
1	10755872	10756427	556	*
1	10779148	10779616	469	*
1	10788576	10789134	559	*
1	10796160	10796903	744	*
1	10804097	10804840	744	*
1	10824772	10825256	485	*
1	10831004	10831420	417	*
1	10835882	10836282	401	*
1	10837209	10837726	518	*
1	10866854	10867635	782	*
1	10900201	10901796	1596	*
1	10909936	10910260	325	*
1	10944144	10944710	567	*
1	10960983	10961514	532	*
1	10965606	10966176	571	*
1	10975650	10976291	642	*
1	10980034	10980522	489	*
1	10990100	10990705	606	*
1	11011842	11013426	1585	*
1	11037631	11038021	391	*
1	11059054	11060600	1547	*
1	11099049	11100224	1176	*
1	11134043	11135236	1194	*
1	11158662	11159154	493	*
1	11178028	11178995	968	*
1	11180257	11180903	647	*
1	11262186	11263039	854	*
1	11272691	11274095	1405	*
1	11281421	11282604	1184	*
1	11292644	11293206	563	*
1	11293851	11294261	411	*
1	11337519	11337824	306	*
1	11478507	11479447	941	*
1	11645733	11646226	494	*
1	11653052	11653700	649	*
1	11654294	11655182	889	*
1	11663960	11664603	644	*
1	11680477	11681873	1397	*
1	11692957	11693709	753	*
1	11735704	11736726	1023	*
1	11749118	11749626	509	*
1	11784993	11785668	676	*
1	11787367	11787960	594	*
1	11790784	11791458	675	*
1	11803432	11803936	505	*
1	11804918	11806554	1637	*
1	11821408	11822075	668	*
1	11838475	11839005	531	*
1	11893818	11894275	458	*
1	11901430	11901906	477	*
1	11908087	11909973	1887	*
1	11918732	11919437	706	*
1	11926221	11926703	483	*
1	11929848	11930160	313	*
1	11934216	11935164	949	*
1	11939014	11939591	578	*
1	11940584	11940956	373	*
1	11966927	11967543	617	*
1	11979568	11980838	1271	*
1	12001963	12002693	731	*
1	12018994	12020323	1330	*
1	12031038	12031615	578	*
1	12040374	12041071	698	*
1	12044172	12044629	458	*
1	12051924	12052572	649	*
1	12075623	12076099	477	*
1	12132053	12132700	648	*
1	12132882	12133571	690	*
1	12135640	12136020	381	*
1	12143383	12144206	824	*
1	12153060	12153833	774	*
1	12161616	12162443	828	*
1	12166800	12167331	532	*
1	12208672	12209258	587	*
1	12229753	12231393	1641	*
1	12271895	12272404	510	*
1	12454467	12455496	1030	*
1	12477991	12478908	918	*
1	12480745	12481248	504	*
1	12518904	12519488	585	*
1	12525398	12525822	425	*
1	12539801	12540845	1045	*
1	12541534	12541892	359	*
1	12548934	12550364	1431	*
1	12556307	12556918	612	*
1	12573511	12574557	1047	*
1	12579980	12580693	714	*
1	12588072	12588730	659	*
1	12593588	12593974	387	*
1	12595180	12596870	1691	*
1	12601816	12602473	658	*
1	12604157	12604779	623	*
1	12615965	12616884	920	*
1	12617939	12619668	1730	*
1	12636213	12637217	1005	*
1	12658957	12659349	393	*
1	12851677	12852274	598	*
1	13661513	13661862	350	*
1	13748803	13750259	1457	*
1	13766837	13767488	652	*
1	13965756	13966258	503	*
1	13996259	13996796	538	*
1	14055417	14056172	756	*
1	14108766	14109527	762	*
1	14140721	14141416	696	*
1	14190461	14190944	484	*
1	14282605	14283264	660	*
1	14291133	14291706	574	*
1	14320451	14320971	521	*
1	14332162	14332910	749	*
1	14340021	14340941	921	*
1	14346002	14346726	725	*
1	14360892	14361423	532	*
1	14366209	14366734	526	*
1	14390664	14391409	746	*
1	14413777	14414260	484	*
1	14443258	14443811	554	*
1	14486304	14487273	970	*
1	14517127	14518009	883	*
1	14522388	14523292	905	*
1	14625717	14626291	575	*
1	14653461	14654116	656	*
1	14742123	14742886	764	*
1	14765592	14766254	663	*
1	14810652	14811474	823	*
1	14814935	14815863	929	*
1	14822423	14822933	511	*
1	14894751	14895391	641	*
1	14910984	14911743	760	*
1	14923720	14925289	1570	*
1	14929428	14930236	809	*
1	14945188	14946047	860	*
1	14946895	14947593	699	*
1	14954076	14954612	537	*
1	14968258	14969013	756	*
1	14970210	14970509	300	*
1	14988031	14988606	576	*
1	14996045	14997078	1034	*
1	15003117	15003856	740	*
1	15014327	15014943	617	*
1	15027554	15028517	964	*
1	15046417	15047008	592	*
1	15056865	15057250	386	*
1	15090304	15090790	487	*
1	15128516	15128880	365	*
1	15152347	15154355	2009	*
1	15178726	15179531	806	*
1	15200348	15201124	777	*
1	15246997	15247624	628	*
1	15261200	15261784	585	*
1	15272367	15272905	539	*
1	15304695	15305134	440	*
1	15323515	15324292	778	*
1	15337433	15338499	1067	*
1	15352352	15352805	454	*
1	15356119	15357277	1159	*
1	15409402	15410507	1106	*
1	15415971	15416663	693	*
1	15426759	15427133	375	*
1	15459756	15460321	566	*
1	15523897	15525496	1600	*
1	15526400	15527307	908	*
1	15584328	15585371	1044	*
1	15602961	15603950	990	*
1	15616787	15618243	1457	*
1	15678592	15678964	373	*
1	15680713	15681569	857	*
1	15684143	15684477	335	*
1	15741178	15741928	751	*
1	15758570	15759606	1037	*
1	15786625	15787114	490	*
1	15788091	15788633	543	*
1	15795089	15795535	447	*
1	15796623	15797228	606	*
1	15799039	15799804	766	*
1	15799930	15801466	1537	*
1	15815460	15815855	396	*
1	15825421	15826171	751	*
1	15833143	15833631	489	*
1	15834313	15836402	2090	*
1	15847169	15848676	1508	*
1	15849261	15850288	1028	*
1	15885750	15886817	1068	*
1	15916374	15916758	385	*
1	15919339	15919701	363	*
1	15923282	15923643	362	*
1	15924587	15925252	666	*
1	15949106	15950302	1197	*
1	15952449	15953083	635	*
1	15975281	15976329	1049	*
1	15994543	15994898	356	*
1	16006891	16007462	572	*
1	16012671	16013781	1111	*
1	16016022	16016582	561	*
1	16032573	16033266	694	*
1	16048538	16049110	573	*
1	16055651	16056491	841	*
1	16068364	16068710	347	*
1	16075994	16077265	1272	*
1	16078983	16079366	384	*
1	16082356	16082824	469	*
1	16112833	16113361	529	*
1	16139350	16140067	718	*
1	16143567	16144322	756	*
1	16144957	16146759	1803	*
1	16154621	16155342	722	*
1	16155526	16156414	889	*
1	16164151	16164755	605	*
1	16167377	16168173	797	*
1	16173007	16173920	914	*
1	16175606	16176557	952	*
1	16181628	16182534	907	*
1	16187620	16188127	508	*
1	16188964	16189389	426	*
1	16206182	16207355	1174	*
1	16217020	16217942	923	*
1	16236094	16237695	1602	*
1	16244394	16244741	348	*
1	16248631	16249136	506	*
1	16249889	16250283	395	*
1	16254086	16254969	884	*
1	16324355	16324811	457	*
1	16351874	16353126	1253	*
1	16366904	16368093	1190	*
1	16375345	16376262	918	*
1	16383768	16384314	547	*
1	16386119	16387221	1103	*
1	16440194	16441583	1390	*
1	16498685	16500220	1536	*
1	16513424	16514596	1173	*
1	16534633	16535763	1131	*
1	16612586	16614054	1469	*
1	16620932	16621405	474	*
1	16623902	16624575	674	*
1	16643661	16645204	1544	*
1	16677819	16678449	631	*
1	16707457	16708098	642	*
1	16709704	16710103	400	*
1	16727178	16728038	861	*
1	16872504	16873832	1329	*
1	16888830	16889936	1107	*
1	16895441	16895834	394	*
1	16895893	16897020	1128	*
1	16903818	16905786	1969	*
1	16913565	16914675	1111	*
1	16948155	16949355	1201	*
1	16951618	16951931	314	*
1	16960562	16961280	719	*
1	16966933	16967907	975	*
1	16971853	16972327	475	*
1	16979840	16981085	1246	*
1	17003628	17004545	918	*
1	17010684	17011328	645	*
1	17011380	17012358	979	*
1	17015944	17016572	629	*
1	17027430	17028166	737	*
1	17053713	17054731	1019	*
1	17059521	17060236	716	*
1	17113764	17114315	552	*
1	17119329	17119682	354	*
1	17121164	17121736	573	*
1	17125734	17126118	385	*
1	17128271	17129089	819	*
1	17162767	17163307	541	*
1	17167947	17168876	930	*
1	17169342	17169691	350	*
1	17186295	17186665	371	*
1	17189924	17190669	746	*
1	17191254	17191734	481	*
1	17207770	17208468	699	*
1	17211971	17213171	1201	*
1	17226319	17226846	528	*
1	17232933	17234205	1273	*
1	17236847	17237640	794	*
1	17250446	17251158	713	*
1	17251523	17252113	591	*
1	17259146	17259671	526	*
1	17276442	17277132	691	*
1	17287263	17287920	658	*
1	17289670	17290314	645	*
1	17335933	17336401	469	*
1	17348064	17348700	637	*
1	17406018	17406667	650	*
1	17437658	17438819	1162	*
1	17439655	17440124	470	*
1	17460091	17461057	967	*
1	17475704	17476328	625	*
1	17494106	17494683	578	*
1	17502277	17502826	550	*
1	17527444	17527882	439	*
1	17531514	17532577	1064	*
1	17539551	17540953	1403	*
1	17545354	17545801	448	*
1	17550988	17552337	1350	*
1	17561327	17562032	706	*
1	17563948	17564291	344	*
1	17564483	17565007	525	*
1	17569120	17570307	1188	*
1	17587616	17588831	1216	*
1	17606758	17607214	457	*
1	17624147	17625424	1278	*
1	17653752	17654104	353	*
1	17696409	17696793	385	*
1	17765484	17766412	929	*
1	17768504	17769353	850	*
1	17825952	17826505	554	*
1	17866357	17866882	526	*
1	17874198	17875022	825	*
1	18022065	18022532	468	*
1	18091880	18092425	546	*
1	18597242	18597930	689	*
1	18618360	18619116	757	*
1	18668808	18669137	330	*
1	18681408	18681657	250	*
1	18820601	18821158	558	*
1	18875210	18875763	554	*
1	18902034	18903322	1289	*
1	18912946	18913455	510	*
1	18922229	18922797	569	*
1	18926416	18927004	589	*
1	18941097	18942068	972	*
1	18949452	18950330	879	*
1	18955548	18957320	1773	*
1	19009788	19010348	561	*
1	19010427	19011595	1169	*
1	19033878	19034533	656	*
1	19066309	19066727	419	*
1	19066858	19067792	935	*
1	19096266	19096559	294	*
1	19113660	19114017	358	*
1	19203354	19203900	547	*
1	19209536	19210905	1370	*
1	19241284	19241759	476	*
1	19251354	19252161	808	*
1	19288442	19289320	879	*
1	19311220	19312970	1751	*
1	19344392	19344696	305	*
1	19430174	19430623	450	*
1	19440443	19440891	449	*
1	19450599	19451394	796	*
1	19469443	19469972	530	*
1	19484422	19486315	1894	*
1	19596283	19597814	1532	*
1	19635705	19636082	378	*
1	19640421	19641151	731	*
1	19643151	19645444	2294	*
1	19650925	19651478	554	*
1	19653558	19654114	557	*
1	19659652	19660138	487	*
1	19676526	19676939	414	*
1	19704480	19704927	448	*
1	19715527	19716119	593	*
1	19754517	19754904	388	*
1	19758183	19758886	704	*
1	19765435	19766026	592	*
1	19799227	19800592	1366	*
1	19828621	19828976	356	*
1	19861006	19861586	581	*
1	19863717	19864330	614	*
1	19866763	19867273	511	*
1	19882057	19883140	1084	*
1	20100807	20101378	572	*
1	20124383	20124946	564	*
1	20152032	20152798	767	*
1	20212955	20213383	429	*
1	20358697	20359268	572	*
1	20376908	20377231	324	*
1	20411149	20411767	619	*
1	20440786	20441120	335	*
1	20476287	20476803	517	*
1	20485430	20486899	1470	*
1	20493766	20494229	464	*
1	20507405	20508464	1060	*
1	20522324	20522843	520	*
1	20530888	20531560	673	*
1	20575221	20576941	1721	*
1	20588607	20590192	1586	*
1	20601190	20602087	898	*
1	20604158	20604767	610	*
1	20612094	20612819	726	*
1	20613481	20614295	815	*
1	20633271	20634189	919	*
1	20634248	20635024	777	*
1	20639969	20640536	568	*
1	20661127	20662053	927	*
1	20696428	20697362	935	*
1	20717505	20718414	910	*
1	20731839	20733652	1814	*
1	20786121	20788267	2147	*
1	20847344	20848846	1503	*
1	20896782	20897322	541	*
1	21022152	21022919	768	*
1	21063911	21064589	679	*
1	21083096	21083679	584	*
1	21091109	21091497	389	*
1	21149459	21150450	992	*
1	21175693	21177426	1734	*
1	21194941	21195696	756	*
1	21231996	21232506	511	*
1	21252209	21252521	313	*
1	21255189	21255689	501	*
1	21261605	21263106	1502	*
1	21289636	21290641	1006	*
1	21294385	21295299	915	*
1	21302641	21303528	888	*
1	21308779	21309656	878	*
1	21311077	21311428	352	*
1	21316970	21317865	896	*
1	21318628	21319063	436	*
1	21324178	21325124	947	*
1	21331895	21332651	757	*
1	21335782	21336220	439	*
1	21337883	21339547	1665	*
1	21344577	21346064	1488	*
1	21355925	21356394	470	*
1	21368203	21369039	837	*
1	21439716	21440474	759	*
1	21490802	21491148	347	*
1	21508815	21509586	772	*
1	21574018	21575138	1121	*
1	21586691	21587521	831	*
1	21594610	21595006	397	*
1	21607530	21608299	770	*
1	21622182	21622916	735	*
1	21626800	21627413	614	*
1	21631872	21632549	678	*
1	21638546	21639367	822	*
1	21639422	21639954	533	*
1	21651427	21652129	703	*
1	21659123	21659613	491	*
1	21703361	21703889	529	*
1	21764385	21765535	1151	*
1	21782242	21784070	1829	*
1	21801094	21801536	443	*
1	21818719	21819051	333	*
1	21861977	21862564	588	*
1	21869570	21870479	910	*
1	21909286	21910434	1149	*
1	21920137	21921268	1132	*
1	21927504	21927948	445	*
1	21930960	21931908	949	*
1	21935813	21937678	1866	*
1	21942930	21943508	579	*
1	21956530	21957399	870	*
1	21963865	21964352	488	*
1	21972949	21973528	580	*
1	22005207	22005695	489	*
1	22019014	22019545	532	*
1	22025016	22026336	1321	*
1	22039634	22040334	701	*
1	22052414	22053824	1411	*
1	22131899	22132946	1048	*
1	22142253	22143889	1637	*
1	22217849	22218175	327	*
1	22275679	22276219	541	*
1	22333019	22333476	458	*
1	22341974	22342518	545	*
1	22388655	22389944	1290	*
1	22414159	22414772	614	*
1	22416555	22416962	408	*
1	22420304	22420815	512	*
1	22428636	22429420	785	*
1	22451595	22452879	1285	*
1	22600410	22601056	647	*
1	22641903	22642559	657	*
1	22689488	22689939	452	*
1	22704457	22704901	445	*
1	22710135	22710640	506	*
1	22739480	22740288	809	*
1	22746015	22746600	586	*
1	22747396	22747783	388	*
1	22750158	22750994	837	*
1	22780756	22781122	367	*
1	22831822	22832655	834	*
1	22870267	22871018	752	*
1	22930159	22930658	500	*
1	22969285	22969671	387	*
1	22976359	22976995	637	*
1	23010481	23011309	829	*
1	23019119	23020420	1302	*
1	23100061	23100585	525	*
1	23167323	23169036	1714	*
1	23177431	23178193	763	*
1	23188320	23189401	1082	*
1	23194242	23195307	1066	*
1	23196733	23197420	688	*
1	23198226	23198780	555	*
1	23216761	23217877	1117	*
1	23224683	23225585	903	*
1	23273260	23273795	536	*
1	23282753	23283409	657	*
1	23343629	23345083	1455	*
1	23367629	23370001	2373	*
1	23402920	23403296	377	*
1	23403656	23404385	730	*
1	23411604	23412183	580	*
1	23423564	23425165	1602	*
1	23451626	23452618	993	*
1	23478797	23479397	601	*
1	23483729	23484965	1237	*
1	23496930	23497609	680	*
1	23528139	23528946	808	*
1	23530560	23531741	1182	*
1	23539583	23540334	752	*
1	23544689	23545228	540	*
1	23554555	23555285	731	*
1	23555888	23557147	1260	*
1	23559100	23559817	718	*
1	23562116	23562666	551	*
1	23567922	23569155	1234	*
1	23576920	23577925	1006	*
1	23585321	23586163	843	*
1	23586576	23587035	460	*
1	23591522	23592016	495	*
1	23593338	23594149	812	*
1	23619353	23620038	686	*
1	23634614	23635794	1181	*
1	23637414	23637978	565	*
1	23651015	23651722	708	*
1	23657738	23658026	289	*
1	23691438	23692406	969	*
1	23718478	23718845	368	*
1	23742948	23744263	1316	*
1	23751154	23751626	473	*
1	23771920	23772623	704	*
1	23777865	23778806	942	*
1	23779778	23780377	600	*
1	23790082	23790463	382	*
1	23790729	23791471	743	*
1	23791575	23792063	489	*
1	23799381	23801144	1764	*
1	23809697	23810077	381	*
1	23824827	23825741	915	*
1	23838292	23839023	732	*
1	23854457	23854994	538	*
1	23867633	23868785	1153	*
1	23907612	23908357	746	*
1	23916811	23917176	366	*
1	23919870	23920469	600	*
1	23951489	23952199	711	*
1	23958953	23960259	1307	*
1	23979810	23981099	1290	*
1	24003308	24003935	628	*
1	24008530	24008916	387	*
1	24009110	24009951	842	*
1	24018570	24019326	757	*
1	24022461	24023200	740	*
1	24028071	24028436	366	*
1	24045920	24046833	914	*
1	24047144	24047516	373	*
1	24048480	24048954	475	*
1	24070821	24071313	493	*
1	24102962	24103364	403	*
1	24107768	24108250	483	*
1	24108588	24109304	717	*
1	24112517	24112883	367	*
1	24117674	24118157	484	*
1	24119781	24120779	999	*
1	24142459	24143446	988	*
1	24149701	24150906	1206	*
1	24186999	24187811	813	*
1	24191933	24192440	508	*
1	24201895	24202498	604	*
1	24236188	24237217	1030	*
1	24266236	24267052	817	*
1	24283558	24284517	960	*
1	24289753	24290522	770	*
1	24294293	24295436	1144	*
1	24321558	24322659	1102	*
1	24352004	24352709	706	*
1	24362990	24363373	384	*
1	24364581	24365759	1179	*
1	24391315	24391610	296	*
1	24392281	24392650	370	*
1	24413310	24413959	650	*
1	24415286	24416321	1036	*
1	24502142	24503447	1306	*
1	24515522	24516130	609	*
1	24541045	24541634	590	*
1	24559035	24559724	690	*
1	24587238	24587530	293	*
1	24635196	24635546	351	*
1	24642428	24644302	1875	*
1	24683524	24684242	719	*
1	24688578	24689111	534	*
1	24705154	24705998	845	*
1	24713076	24713798	723	*
1	24744802	24746077	1276	*
1	24769860	24770591	732	*
1	24830708	24831043	336	*
1	24847828	24848874	1047	*
1	24862067	24862836	770	*
1	24929328	24930717	1390	*
1	24949242	24949810	569	*
1	24970427	24970858	432	*
1	25017391	25017981	591	*
1	25022145	25023306	1162	*
1	25031821	25032727	907	*
1	25101445	25101875	431	*
1	25182512	25182955	444	*
1	25231975	25232968	994	*
1	25233087	25233467	381	*
1	25239543	25240502	960	*
1	25246801	25248117	1317	*
1	25267745	25268338	594	*
1	25338088	25339045	958	*
1	25352187	25352636	450	*
1	25371415	25372347	933	*
1	25429892	25431495	1604	*
1	25503836	25504123	288	*
1	25506663	25507290	628	*
1	25543299	25544234	936	*
1	25544486	25545122	637	*
1	25549308	25550171	864	*
1	25556505	25557291	787	*
1	25568339	25569305	967	*
1	25573407	25573923	517	*
1	25608502	25608914	413	*
1	25615950	25617256	1307	*
1	25629850	25630402	553	*
1	25688371	25689210	840	*
1	25695022	25695486	465	*
1	25743480	25744517	1038	*
1	25799794	25800870	1077	*
1	25810701	25811265	565	*
1	25819179	25821104	1926	*
1	25858627	25859912	1286	*
1	25874892	25876202	1311	*
1	25890339	25890880	542	*
1	25892191	25892942	752	*
1	25895402	25895736	335	*
1	25905375	25907163	1789	*
1	25922667	25923451	785	*
1	25997655	25998717	1063	*
1	26034962	26036488	1527	*
1	26094281	26095153	873	*
1	26097644	26098059	416	*
1	26110736	26112651	1916	*
1	26123212	26123790	579	*
1	26144964	26145497	534	*
1	26161653	26162350	698	*
1	26169603	26170465	863	*
1	26177151	26177707	557	*
1	26190267	26190696	430	*
1	26218920	26219662	743	*
1	26233621	26235273	1653	*
1	26275976	26276551	576	*
1	26279627	26280703	1077	*
1	26284675	26285332	658	*
1	26306139	26307123	985	*
1	26321177	26322091	915	*
1	26336124	26337025	902	*
1	26358763	26359175	413	*
1	26363839	26364075	237	*
1	26377926	26378848	923	*
1	26387288	26387733	446	*
1	26391522	26391892	371	*
1	26404668	26405788	1121	*
1	26417000	26417433	434	*
1	26431862	26432840	979	*
1	26471502	26473345	1844	*
1	26500042	26501745	1704	*
1	26529369	26531598	2230	*
1	26620117	26621724	1608	*
1	26636508	26637225	718	*
1	26677344	26678044	701	*
1	26692241	26693374	1134	*
1	26695330	26696389	1060	*
1	26697815	26698472	658	*
1	26705396	26706343	948	*
1	26723305	26724064	760	*
1	26771340	26772289	950	*
1	26787538	26788709	1172	*
1	26799521	26800261	741	*
1	26810047	26810413	367	*
1	26826152	26827533	1382	*
1	26848822	26849895	1074	*
1	26853115	26853439	325	*
1	26862871	26863646	776	*
1	26864547	26865706	1160	*
1	26877977	26878338	362	*
1	26889572	26890699	1128	*
1	26899816	26900691	876	*
1	26907233	26907994	762	*
1	26921255	26922429	1175	*
1	26949835	26950287	453	*
1	26966902	26967379	478	*
1	26993239	26994449	1211	*
1	26997679	26998045	367	*
1	26999347	26999992	646	*
1	27009501	27010249	749	*
1	27010837	27011392	556	*
1	27012710	27013452	743	*
1	27031272	27031917	646	*
1	27044474	27045063	590	*
1	27097433	27097715	283	*
1	27098980	27100174	1195	*
1	27111828	27112539	712	*
1	27122481	27123086	606	*
1	27154581	27155729	1149	*
1	27192034	27193098	1065	*
1	27197858	27198370	513	*
1	27233985	27235683	1699	*
1	27284518	27285156	639	*
1	27296712	27297188	477	*
1	27300607	27301314	708	*
1	27306820	27307360	541	*
1	27321846	27322768	923	*
1	27349270	27350290	1021	*
1	27365342	27367363	2022	*
1	27380701	27381190	490	*
1	27392120	27393044	925	*
1	27395495	27395752	258	*
1	27416548	27416923	376	*
1	27436314	27436940	627	*
1	27489652	27490936	1285	*
1	27528143	27529348	1206	*
1	27538817	27539097	281	*
1	27540108	27540923	816	*
1	27542263	27543291	1029	*
1	27556843	27558342	1500	*
1	27568169	27569060	892	*
1	27575240	27576258	1019	*
1	27589711	27590524	814	*
1	27590972	27591534	563	*
1	27603405	27604509	1105	*
1	27643763	27644238	476	*
1	27650573	27651213	641	*
1	27658817	27660339	1523	*
1	27671889	27672863	975	*
1	27686472	27687121	650	*
1	27725424	27726623	1200	*
1	27772799	27773968	1170	*
1	27817148	27817707	560	*
1	27830331	27831505	1175	*
1	27857896	27858809	914	*
1	27872256	27872893	638	*
1	27875147	27875657	511	*
1	27914071	27915036	966	*
1	27934772	27935340	569	*
1	27959368	27960461	1094	*
1	27968716	27969065	350	*
1	28087711	28089153	1443	*
1	28105055	28105628	574	*
1	28153124	28153545	422	*
1	28232522	28233169	648	*
1	28235614	28236703	1090	*
1	28246950	28247610	661	*
1	28249430	28249818	389	*
1	28259109	28260735	1627	*
1	28296683	28297234	552	*
1	28313739	28314517	779	*
1	28328683	28329794	1112	*
1	28346158	28346781	624	*
1	28351574	28352544	971	*
1	28353702	28354520	819	*
1	28359677	28359994	318	*
1	28369355	28370651	1297	*
1	28391715	28392569	855	*
1	28395163	28395712	550	*
1	28409746	28410210	465	*
1	28416443	28416830	388	*
1	28417363	28417994	632	*
1	28437263	28438502	1240	*
1	28449917	28450473	557	*
1	28471393	28471996	604	*
1	28505584	28506709	1126	*
1	28517839	28519160	1322	*
1	28552501	28554024	1524	*
1	28581067	28582350	1284	*
1	28591898	28593167	1270	*
1	28594616	28595194	579	*
1	28601613	28602171	559	*
1	28602822	28603144	323	*
1	28642266	28643729	1464	*
1	28648028	28648458	431	*
1	28648513	28649437	925	*
1	28668208	28669771	1564	*
1	28721916	28722350	435	*
1	28736294	28738085	1792	*
1	28784953	28785839	887	*
1	28859839	28861117	1279	*
1	28865809	28866330	522	*
1	28877088	28877555	468	*
1	28882054	28882487	434	*
1	28884717	28885369	653	*
1	28886766	28887428	663	*
1	28887486	28888508	1023	*
1	28914067	28915562	1496	*
1	28972050	28972851	802	*
1	29122027	29123307	1281	*
1	29124235	29125069	835	*
1	29133637	29134544	908	*
1	29181065	29182382	1318	*
1	29197558	29197864	307	*
1	29202662	29203408	747	*
1	29230546	29231331	786	*
1	29236158	29236840	683	*
1	29239153	29239612	460	*
1	29245795	29246359	565	*
1	29257122	29257798	677	*
1	29271654	29272312	659	*
1	29282964	29283742	779	*
1	29453522	29453897	376	*
1	29513330	29513706	377	*
1	29569819	29570705	887	*
1	29584710	29585299	590	*
1	29640009	29640474	466	*
1	29649379	29650263	885	*
1	29697981	29698465	485	*
1	29707021	29707318	298	*
1	29708922	29710133	1212	*
1	29793034	29793518	485	*
1	29974290	29974815	526	*
1	30083736	30084498	763	*
1	30191174	30191728	555	*
1	30525778	30526552	775	*
1	30657419	30658234	816	*
1	30670303	30671076	774	*
1	30707964	30708441	478	*
1	30717924	30719570	1647	*
1	30778424	30778702	279	*
1	30779610	30779937	328	*
1	30782344	30782775	432	*
1	30801573	30802231	659	*
1	30807097	30807806	710	*
1	30816321	30817004	684	*
1	30823710	30824957	1248	*
1	30854151	30854458	308	*
1	30909911	30910392	482	*
1	30911207	30911873	667	*
1	30929225	30930082	858	*
1	30966574	30967281	708	*
1	31065005	31066198	1194	*
1	31101115	31101479	365	*
1	31111209	31111789	581	*
1	31135755	31136565	811	*
1	31154600	31155842	1243	*
1	31162527	31163031	505	*
1	31170578	31171488	911	*
1	31181473	31182771	1299	*
1	31238959	31240176	1218	*
1	31296392	31297552	1161	*
1	31372982	31374118	1137	*
1	31394489	31395235	747	*
1	31412974	31414266	1293	*
1	31422487	31423071	585	*
1	31482792	31483961	1170	*
1	31497529	31498171	643	*
1	31520740	31521344	605	*
1	31523711	31524131	421	*
1	31530896	31531837	942	*
1	31548660	31550139	1480	*
1	31550941	31551692	752	*
1	31573778	31574467	690	*
1	31575511	31576687	1177	*
1	31583701	31584507	807	*
1	31587810	31588388	579	*
1	31588549	31589700	1152	*
1	31591581	31592142	562	*
1	31593868	31594505	638	*
1	31644327	31645443	1117	*
1	31666227	31666997	771	*
1	31669619	31670616	998	*
1	31689637	31690289	653	*
1	31700775	31702034	1260	*
1	31712468	31713124	657	*
1	31714916	31715885	970	*
1	31736551	31737159	609	*
1	31745372	31747100	1729	*
1	31753780	31754378	599	*
1	31762577	31763428	852	*
1	31769477	31770433	957	*
1	31775456	31776004	549	*
1	31788156	31789687	1532	*
1	31798128	31799430	1303	*
1	31815799	31816287	489	*
1	31897231	31898332	1102	*
1	31937347	31938914	1568	*
1	31939651	31940225	575	*
1	31944225	31945119	895	*
1	31954387	31955348	962	*
1	31955970	31956531	562	*
1	31963943	31964665	723	*
1	31977738	31978142	405	*
1	32003443	32003848	406	*
1	32013192	32014957	1766	*
1	32062269	32062989	721	*
1	32066336	32066889	554	*
1	32072419	32073646	1228	*
1	32100991	32101852	862	*
1	32107600	32108916	1317	*
1	32133216	32133914	699	*
1	32179234	32180845	1612	*
1	32200224	32201210	987	*
1	32205206	32206404	1199	*
1	32215623	32216113	491	*
1	32221817	32222915	1099	*
1	32235874	32236557	684	*
1	32240210	32241801	1592	*
1	32246796	32247398	603	*
1	32248056	32248730	675	*
1	32291636	32292866	1231	*
1	32335111	32336581	1471	*
1	32351071	32352371	1301	*
1	32393915	32395215	1301	*
1	32400835	32401499	665	*
1	32413751	32414292	542	*
1	32448335	32448883	549	*
1	32485491	32486174	684	*
1	32500058	32501186	1129	*
1	32520460	32521051	592	*
1	32539003	32540399	1397	*
1	32611930	32612750	821	*
1	32650210	32651811	1602	*
1	32701461	32704280	2820	*
1	32712183	32712698	516	*
1	32716457	32717224	768	*
1	32724598	32725830	1233	*
1	32729946	32730381	436	*
1	32741090	32742020	931	*
1	32742063	32742860	798	*
1	32759255	32759941	687	*
1	32760009	32760605	597	*
1	32760996	32761899	904	*
1	32769503	32770062	560	*
1	32772956	32773496	541	*
1	32775204	32775964	761	*
1	32789255	32789926	672	*
1	32795458	32796149	692	*
1	32816714	32818591	1878	*
1	32876650	32877028	379	*
1	32878264	32878633	370	*
1	32892747	32893499	753	*
1	32901056	32901831	776	*
1	32933440	32934470	1031	*
1	32948849	32949263	415	*
1	32963670	32965150	1481	*
1	32981012	32981835	824	*
1	32988750	32989605	856	*
1	32992353	32993050	698	*
1	33007199	33007790	592	*
1	33036018	33037276	1259	*
1	33050116	33050851	736	*
1	33055151	33055897	747	*
1	33060427	33061289	863	*
1	33072655	33073102	448	*
1	33080812	33081648	837	*
1	33086272	33086854	583	*
1	33099148	33099961	814	*
1	33126930	33127637	708	*
1	33152987	33153535	549	*
1	33163529	33164061	533	*
1	33180584	33182323	1740	*
1	33220893	33221617	725	*
1	33255420	33256296	877	*
1	33256306	33257334	1029	*
1	33295352	33295818	467	*
1	33298534	33299060	527	*
1	33306475	33307614	1140	*
1	33327671	33328340	670	*
1	33346943	33347273	331	*
1	33349103	33350674	1572	*
1	33367587	33368157	571	*
1	33430347	33431440	1094	*
1	33433553	33434092	540	*
1	33442928	33444204	1277	*
1	33455770	33456169	400	*
1	33458570	33458985	416	*
1	33470513	33470830	318	*
1	33472200	33473007	808	*
1	33612814	33613229	416	*
1	33633117	33633722	606	*
1	34597859	34598253	395	*
1	34681505	34681846	342	*
1	34742641	34743057	417	*
1	34755174	34755625	452	*
1	34762838	34763960	1123	*
1	34780995	34782368	1374	*
1	34783572	34783939	368	*
1	34786448	34786802	355	*
1	34852638	34853300	663	*
1	34858941	34860221	1281	*
1	34865792	34866862	1071	*
1	34983987	34985786	1800	*
1	35030904	35032285	1382	*
1	35047186	35047899	714	*
1	35062605	35063312	708	*
1	35079020	35079983	964	*
1	35191857	35193739	1883	*
1	35202107	35202626	520	*
1	35268337	35269595	1259	*
1	35287850	35288225	376	*
1	35451051	35451518	468	*
1	35505791	35506612	822	*
1	35538332	35538784	453	*
1	35545064	35545432	369	*
1	35556788	35557986	1199	*
1	35564514	35564995	482	*
1	35568945	35569259	315	*
1	35573084	35573788	705	*
1	35641183	35642242	1060	*
1	35707435	35708520	1086	*
1	35717807	35719352	1546	*
1	35726698	35727403	706	*
1	35769188	35770392	1205	*
1	35807456	35809215	1760	*
1	35882776	35884186	1411	*
1	35930214	35931932	1719	*
1	36088501	36089893	1393	*
1	36097041	36097396	356	*
1	36099439	36100327	889	*
1	36133369	36134088	720	*
1	36148961	36150074	1114	*
1	36150543	36151275	733	*
1	36155507	36157411	1905	*
1	36160859	36161470	612	*
1	36187748	36188649	902	*
1	36203404	36204388	985	*
1	36223713	36225228	1516	*
1	36248297	36249066	770	*
1	36285460	36285780	321	*
1	36299812	36300410	599	*
1	36306095	36307512	1418	*
1	36322954	36324013	1060	*
1	36342660	36343370	711	*
1	36350693	36351914	1222	*
1	36373550	36375162	1613	*
1	36385426	36387114	1689	*
1	36397188	36398198	1011	*
1	36408511	36409136	626	*
1	36420770	36421355	586	*
1	36450048	36451018	971	*
1	36463516	36464871	1356	*
1	36516382	36516722	341	*
1	36553806	36554295	490	*
1	36575953	36576528	576	*
1	36650348	36650794	447	*
1	36703728	36704207	480	*
1	37177291	37177622	332	*
1	37434273	37434856	584	*
1	37454707	37455728	1022	*
1	37471395	37472248	854	*
1	37474232	37474768	537	*
1	37476462	37477130	669	*
1	37479653	37480195	543	*
1	37486978	37487690	713	*
1	37499017	37499626	610	*
1	37513837	37515331	1495	*
1	37534408	37534891	484	*
1	37553838	37554618	781	*
1	37595298	37596434	1137	*
1	37689711	37690854	1144	*
1	37691509	37692908	1400	*
1	37752611	37753400	790	*
1	37793454	37794626	1173	*
1	37807540	37809331	1792	*
1	37859019	37860508	1490	*
1	37931154	37932257	1104	*
1	37946109	37947289	1181	*
1	37989262	37990440	1179	*
1	37995706	37996860	1155	*
1	38000446	38001025	580	*
1	38005141	38005966	826	*
1	38012210	38013353	1144	*
1	38029961	38030510	550	*
1	38046565	38047713	1149	*
1	38064147	38064791	645	*
1	38138357	38139304	948	*
1	38220997	38221636	640	*
1	38235687	38236111	425	*
1	38786327	38786974	648	*
1	38835167	38835583	417	*
1	38858857	38860465	1609	*
1	38872685	38873945	1261	*
1	38941251	38942232	982	*
1	38990719	38992449	1731	*
1	39025925	39027199	1275	*
1	39081031	39082025	995	*
1	39092383	39092694	312	*
1	39098392	39099014	623	*
1	39104974	39106610	1637	*
1	39130233	39130724	492	*
1	39159189	39159597	409	*
1	39178233	39179380	1148	*
1	39183584	39184322	739	*
1	39191709	39192762	1054	*
1	39204464	39205072	609	*
1	39258621	39259130	510	*
1	39378318	39378642	325	*
1	39387455	39387822	368	*
1	39391916	39392405	490	*
1	39395503	39395886	384	*
1	39398319	39399115	797	*
1	39408329	39409802	1474	*
1	39490998	39491990	993	*
1	39514622	39515062	441	*
1	39539046	39539574	529	*
1	39559116	39560018	903	*
1	39576362	39577138	777	*
1	39605929	39606786	858	*
1	39609591	39610072	482	*
1	39632720	39633433	714	*
1	39639418	39640168	751	*
1	39653529	39653923	395	*
1	39691077	39691766	690	*
1	39701541	39702223	683	*
1	39738591	39739547	957	*
1	39788360	39789634	1275	*
1	39799062	39800286	1225	*
1	39816576	39817174	599	*
1	39845593	39846040	448	*
1	39852144	39852898	755	*
1	39882773	39883903	1131	*
1	39892558	39893607	1050	*
1	39900803	39902566	1764	*
1	39919517	39919891	375	*
1	39954860	39956365	1506	*
1	39960377	39960878	502	*
1	39981880	39982290	411	*
1	40015162	40015548	387	*
1	40039419	40041100	1682	*
1	40084739	40085261	523	*
1	40096720	40097850	1131	*
1	40143857	40144374	518	*
1	40161030	40162105	1076	*
1	40257397	40258740	1344	*
1	40267708	40268252	545	*
1	40315266	40315794	529	*
1	40316451	40317034	584	*
1	40338690	40339092	403	*
1	40373355	40374984	1630	*
1	40379831	40380367	537	*
1	40449712	40451236	1525	*
1	40476917	40478032	1116	*
1	40508334	40509483	1150	*
1	40531210	40532231	1022	*
1	40583226	40583812	587	*
1	40612286	40612818	533	*
1	40665237	40666118	882	*
1	40668853	40669137	285	*
1	40691385	40692823	1439	*
1	40703263	40703864	602	*
1	40711342	40711956	615	*
1	40774078	40774560	483	*
1	40783339	40783999	661	*
1	40802192	40802839	648	*
1	40848492	40848919	428	*
1	40849833	40850364	532	*
1	40861356	40862930	1575	*
1	40875679	40876137	459	*
1	40877620	40878264	645	*
1	40897446	40897911	466	*
1	40898368	40898998	631	*
1	40901860	40902451	592	*
1	40944268	40944754	487	*
1	40952327	40952984	658	*
1	40967415	40968608	1194	*
1	40979278	40980646	1369	*
1	41003429	41004200	772	*
1	41101994	41102903	910	*
1	41109288	41110335	1048	*
1	41123017	41123562	546	*
1	41152361	41153238	878	*
1	41241245	41242759	1515	*
1	41268145	41268680	536	*
1	41317390	41317787	398	*
1	41322901	41323235	335	*
1	41325781	41326197	417	*
1	41341889	41342558	670	*
1	41360853	41362213	1361	*
1	41365752	41366963	1212	*
1	41371749	41372614	866	*
1	41381088	41383080	1993	*
1	41387694	41388102	409	*
1	41414882	41415278	397	*
1	41418825	41419442	618	*
1	41423460	41424372	913	*
1	41432302	41433556	1255	*
1	41435559	41436005	447	*
1	41442555	41443274	720	*
1	41455641	41456335	695	*
1	41474460	41475319	860	*
1	41476685	41477396	712	*
1	41482320	41483555	1236	*
1	41484240	41485204	965	*
1	41485650	41485964	315	*
1	41493025	41493672	648	*
1	41496138	41496665	528	*
1	41498540	41499271	732	*
1	41501514	41502149	636	*
1	41514342	41514829	488	*
1	41514896	41515732	837	*
1	41515863	41516567	705	*
1	41573918	41574645	728	*
1	41626058	41627373	1316	*
1	41629621	41629949	329	*
1	41649975	41650490	516	*
1	41661448	41663229	1782	*
1	41672088	41672796	709	*
1	41712628	41713107	480	*
1	41713656	41714293	638	*
1	41782996	41783720	725	*
1	41812101	41812967	867	*
1	41823379	41823860	482	*
1	41862239	41863420	1182	*
1	41870033	41870608	576	*
1	41900494	41901196	703	*
1	41901960	41902633	674	*
1	41917920	41918414	495	*
1	41920671	41921037	367	*
1	41935994	41936494	501	*
1	41954462	41955091	630	*
1	41955390	41956176	787	*
1	42003430	42003835	406	*
1	42035166	42036329	1164	*
1	42146682	42147199	518	*
1	42165450	42166373	924	*
1	42176975	42177264	290	*
1	42214434	42215001	568	*
1	42334277	42335985	1709	*
1	42380259	42381163	905	*
1	42420861	42421384	524	*
1	42439873	42440401	529	*
1	42455902	42457189	1288	*
1	42462791	42463714	924	*
1	42657938	42659272	1335	*
1	42681744	42683354	1611	*
1	42765911	42767792	1882	*
1	42816354	42817598	1245	*
1	42845959	42847413	1455	*
1	42922981	42923355	375	*
1	42923874	42925194	1321	*
1	42936100	42936981	882	*
1	42940948	42941426	479	*
1	42941715	42942195	481	*
1	42943146	42943685	540	*
1	42957784	42959439	1656	*
1	42962618	42963010	393	*
1	42966960	42967618	659	*
1	43008175	43009040	866	*
1	43048691	43049376	686	*
1	43073501	43074014	514	*
1	43147502	43148082	581	*
1	43171755	43172905	1151	*
1	43206579	43207832	1254	*
1	43227089	43227702	614	*
1	43238134	43238428	295	*
1	43256632	43257141	510	*
1	43293906	43295013	1108	*
1	43348468	43349851	1384	*
1	43358151	43359516	1366	*
1	43366714	43368611	1898	*
1	43373017	43373782	766	*
1	43389297	43390281	985	*
1	43414542	43415138	597	*
1	43423510	43424207	698	*
1	43452794	43454203	1410	*
1	43454453	43454857	405	*
1	43472473	43473190	718	*
1	43476042	43476342	301	*
1	43523115	43523506	392	*
1	43529241	43529491	251	*
1	43530539	43532153	1615	*
1	43537427	43537828	402	*
1	43582085	43582742	658	*
1	43649481	43650828	1348	*
1	43706868	43708160	1293	*
1	43763354	43764027	674	*
1	43774383	43774714	332	*
1	43776451	43776822	372	*
1	43783139	43784240	1102	*
1	43821793	43822681	889	*
1	43834940	43835674	735	*
1	43836380	43836912	533	*
1	43853093	43853949	857	*
1	43858135	43859009	875	*
1	43872297	43872690	394	*
1	43879246	43880111	866	*
1	43885002	43885942	941	*
1	43912682	43913125	444	*
1	43933185	43934670	1486	*
1	43946174	43947660	1487	*
1	43969652	43970340	689	*
1	43974213	43975588	1376	*
1	43979499	43980375	877	*
1	43990985	43992252	1268	*
1	44005657	44006249	593	*
1	44029668	44031794	2127	*
1	44035991	44036914	924	*
1	44047724	44048574	851	*
1	44048785	44049233	449	*
1	44049575	44050472	898	*
1	44089514	44090151	638	*
1	44101190	44101930	741	*
1	44154747	44155557	811	*
1	44213176	44213992	817	*
1	44293704	44294348	645	*
1	44325900	44326743	844	*
1	44327566	44328599	1034	*
1	44354740	44355757	1018	*
1	44378039	44378608	570	*
1	44389862	44390867	1006	*
1	44404980	44406931	1952	*
1	44423437	44424337	901	*
1	44485102	44486387	1286	*
1	44531857	44532655	799	*
1	44553754	44554152	399	*
1	44568122	44568494	373	*
1	44584122	44584599	478	*
1	44594956	44595672	717	*
1	44631411	44632873	1463	*
1	44652536	44653217	682	*
1	44673765	44675032	1268	*
1	44707038	44707574	537	*
1	44714953	44715348	396	*
1	44720984	44722359	1376	*
1	44730452	44731595	1144	*
1	44738059	44738950	892	*
1	44739334	44740474	1141	*
1	44775025	44776807	1783	*
1	44786051	44786912	862	*
1	44793497	44794046	550	*
1	44799663	44801070	1408	*
1	44807011	44808831	1821	*
1	44819197	44820599	1403	*
1	44835822	44836279	458	*
1	44842792	44843688	897	*
1	44924809	44925419	611	*
1	44947036	44947875	840	*
1	44968068	44968737	670	*
1	44970284	44970709	426	*
1	44985729	44986942	1214	*
1	45010504	45011529	1026	*
1	45011798	45013072	1275	*
1	45018658	45019125	468	*
1	45172017	45172336	320	*
1	45179685	45180568	884	*
1	45205600	45207029	1430	*
1	45246610	45247203	594	*
1	45265943	45267216	1274	*
1	45303263	45304446	1184	*
1	45326562	45328134	1573	*
1	45329382	45329877	496	*
1	45339494	45340801	1308	*
1	45356251	45356608	358	*
1	45393594	45394459	866	*
1	45410782	45411880	1099	*
1	45442100	45442589	490	*
1	45490577	45491724	1148	*
1	45499570	45500740	1171	*
1	45508155	45509219	1065	*
1	45521182	45523100	1919	*
1	45550401	45551365	965	*
1	45569693	45570608	916	*
1	45583233	45585164	1932	*
1	45590253	45590612	360	*
1	45686100	45687656	1557	*
1	45750145	45751170	1026	*
1	45802724	45804575	1852	*
1	45881575	45881946	372	*
1	45892117	45892823	707	*
1	45954278	45954896	619	*
1	46036888	46037529	642	*
1	46103055	46103487	433	*
1	46132112	46133601	1490	*
1	46134808	46135352	545	*
1	46171172	46172098	927	*
1	46174472	46175164	693	*
1	46179525	46179840	316	*
1	46183021	46183875	855	*
1	46197891	46198927	1037	*
1	46223477	46223984	508	*
1	46246921	46248601	1681	*
1	46301463	46303447	1985	*
1	46303506	46303965	460	*
1	46333535	46333874	340	*
1	46339610	46341363	1754	*
1	46347892	46348560	669	*
1	46401918	46402590	673	*
1	46406149	46406970	822	*
1	46442295	46443205	911	*
1	46446880	46447171	292	*
1	46477420	46477779	360	*
1	46489229	46490208	980	*
1	46508740	46509068	329	*
1	46516661	46517561	901	*
1	46520084	46521005	922	*
1	46522163	46522946	784	*
1	46527947	46528375	429	*
1	46532913	46533681	769	*
1	46547941	46548372	432	*
1	46603614	46604612	999	*
1	46611733	46612138	406	*
1	46616261	46617303	1043	*
1	46643209	46643904	696	*
1	46667551	46668784	1234	*
1	46718571	46719655	1085	*
1	46725050	46725599	550	*
1	46747720	46748052	333	*
1	47013033	47013969	937	*
1	47030783	47031705	923	*
1	47179060	47179780	721	*
1	47189926	47190699	774	*
1	47253895	47254364	470	*
1	47313357	47314612	1256	*
1	47333354	47334920	1567	*
1	47388600	47389164	565	*
1	47424364	47424858	495	*
1	47436481	47438422	1942	*
1	47449920	47450329	410	*
1	47478015	47478601	587	*
1	47487766	47488321	556	*
1	47507866	47508755	890	*
1	47521121	47521902	782	*
1	47534050	47534844	795	*
1	47569743	47570233	491	*
1	47650197	47650736	540	*
1	47684675	47685536	862	*
1	47709385	47710965	1581	*
1	47725884	47726597	714	*
1	47738592	47739094	503	*
1	47758246	47759491	1246	*
1	47763550	47764213	664	*
1	47809208	47809912	705	*
1	47871626	47872455	830	*
1	47894589	47895325	737	*
1	47905834	47906968	1135	*
1	47914166	47914981	816	*
1	47926410	47926953	544	*
1	47934092	47935201	1110	*
1	47940774	47941184	411	*
1	47941614	47942561	948	*
1	47991168	47991514	347	*
1	47992679	47993225	547	*
1	47996398	47997948	1551	*
1	48007016	48007644	629	*
1	48017669	48018183	515	*
1	48019613	48020357	745	*
1	48026247	48026675	429	*
1	48052150	48052999	850	*
1	48069402	48070812	1411	*
1	48077678	48078333	656	*
1	48082262	48082980	719	*
1	48093679	48094533	855	*
1	48109416	48109956	541	*
1	48114839	48115419	581	*
1	48186328	48186753	426	*
1	48201961	48202631	671	*
1	48236691	48237266	576	*
1	48369084	48369978	895	*
1	48471695	48472666	972	*
1	48494274	48494799	526	*
1	48498141	48498427	287	*
1	48530771	48531116	346	*
1	48572677	48573153	477	*
1	48677354	48677659	306	*
1	48693732	48694275	544	*
1	48741406	48741925	520	*
1	48807628	48808220	593	*
1	48817577	48817884	308	*
1	48852861	48853601	741	*
1	48859408	48859788	381	*
1	48878257	48879041	785	*
1	48916138	48916508	371	*
1	48931344	48932388	1045	*
1	49257177	49258088	912	*
1	49331465	49331911	447	*
1	50271973	50272280	308	*
1	50332915	50333806	892	*
1	50348575	50349236	662	*
1	50423300	50424032	733	*
1	50603635	50604158	524	*
1	50873394	50874116	723	*
1	50959266	50960810	1545	*
1	50968035	50970368	2334	*
1	50976458	50978584	2127	*
1	50984996	50985575	580	*
1	51063089	51063664	576	*
1	51070544	51071006	463	*
1	51072051	51072531	481	*
1	51235776	51237290	1515	*
1	51261208	51261815	608	*
1	51264383	51264926	544	*
1	51296567	51297256	690	*
1	51313908	51314811	904	*
1	51331212	51331790	579	*
1	51344659	51345302	644	*
1	51422044	51422311	268	*
1	51517965	51519654	1690	*
1	51541179	51541956	778	*
1	51558093	51559023	931	*
1	51567443	51568198	756	*
1	51569424	51570299	876	*
1	51575462	51576038	577	*
1	51616843	51617888	1046	*
1	51622435	51622906	472	*
1	51636939	51637516	578	*
1	51642447	51643237	791	*
1	51648250	51648922	673	*
1	51660680	51661648	969	*
1	51671487	51672367	881	*
1	51729131	51730290	1160	*
1	51736700	51737169	470	*
1	51877901	51879380	1480	*
1	51897330	51898044	715	*
1	51898120	51898682	563	*
1	51990323	51991085	763	*
1	52002153	52002653	501	*
1	52032386	52034010	1625	*
1	52054856	52055914	1059	*
1	52056009	52056990	982	*
1	52127289	52127967	679	*
1	52141719	52143019	1301	*
1	52159379	52159767	389	*
1	52176395	52177281	887	*
1	52296311	52296682	372	*
1	52365096	52366672	1577	*
1	52368395	52368721	327	*
1	52403631	52405127	1497	*
1	52552185	52553922	1738	*
1	52574487	52575296	810	*
1	52632877	52633611	735	*
1	52662478	52663279	802	*
1	52686270	52686607	338	*
1	52697609	52698840	1232	*
1	52702901	52703744	844	*
1	52708277	52708829	553	*
1	52726054	52727456	1403	*
1	52833404	52834077	674	*
1	52842392	52844256	1865	*
1	52921119	52922135	1017	*
1	52926921	52928313	1393	*
1	53014700	53015109	410	*
1	53047710	53048334	625	*
1	53135219	53136130	912	*
1	53145743	53146802	1060	*
1	53172709	53173220	512	*
1	53185527	53186037	511	*
1	53196296	53197633	1338	*
1	53220036	53221029	994	*
1	53238148	53239113	966	*
1	53292954	53293549	596	*
1	53325710	53327664	1955	*
1	53327960	53328495	536	*
1	53381725	53382400	676	*
1	53393328	53393769	442	*
1	53413004	53414035	1032	*
1	53444602	53445101	500	*
1	53448658	53449511	854	*
1	53470042	53470519	478	*
1	53477615	53478046	432	*
1	53485294	53486022	729	*
1	53509304	53509660	357	*
1	53512071	53512979	909	*
1	53541811	53542925	1115	*
1	53572207	53573064	858	*
1	53582111	53582700	590	*
1	53625926	53626533	608	*
1	53639096	53639860	765	*
1	53685077	53686069	993	*
1	53697854	53698718	865	*
1	53732914	53733761	848	*
1	53734992	53735289	298	*
1	53738816	53739696	881	*
1	53811323	53811988	666	*
1	53837213	53838776	1564	*
1	53860909	53861533	625	*
1	53889463	53890347	885	*
1	53945277	53946835	1559	*
1	53956937	53957723	787	*
1	53991898	53992658	761	*
1	54016327	54016910	584	*
1	54052219	54054103	1885	*
1	54069868	54070432	565	*
1	54121144	54122067	924	*
1	54153779	54154293	515	*
1	54157883	54158580	698	*
1	54181719	54182039	321	*
1	54199500	54200904	1405	*
1	54227031	54227747	717	*
1	54229183	54229987	805	*
1	54249847	54250145	299	*
1	54253436	54254130	695	*
1	54272890	54274250	1361	*
1	54287011	54287875	865	*
1	54335480	54336123	644	*
1	54406041	54407210	1170	*
1	54408284	54408605	322	*
1	54421007	54421610	604	*
1	54459505	54460171	667	*
1	54487959	54488701	743	*
[truncated: 61,310 more rows]

## Sheet: 24h Hpx
seqnames	start	end	width	strand
1	778299	779351	1053	*
1	827071	827867	797	*
1	869588	870277	690	*
1	904342	904972	631	*
1	906737	907269	533	*
1	910700	911618	919	*
1	925547	925907	361	*
1	938127	938853	727	*
1	943119	943494	376	*
1	958967	959750	784	*
1	960362	961376	1015	*
1	966000	967403	1404	*
1	975863	976675	813	*
1	999808	1000940	1133	*
1	1001493	1002070	578	*
1	1013193	1014674	1482	*
1	1019301	1020328	1028	*
1	1021094	1021761	668	*
1	1024309	1025491	1183	*
1	1058401	1059991	1591	*
1	1063850	1064556	707	*
1	1073787	1074599	813	*
1	1079376	1080609	1234	*
1	1115755	1116871	1117	*
1	1121728	1122603	876	*
1	1157379	1158591	1213	*
1	1208034	1208768	735	*
1	1231160	1232462	1303	*
1	1244049	1244702	654	*
1	1264758	1265571	814	*
1	1273072	1274784	1713	*
1	1281516	1282462	947	*
1	1290817	1292185	1369	*
1	1304744	1305959	1216	*
1	1307903	1308782	880	*
1	1318257	1318637	381	*
1	1324304	1325727	1424	*
1	1330637	1331626	990	*
1	1344665	1346397	1733	*
1	1347682	1348351	670	*
1	1352974	1354118	1145	*
1	1360013	1360973	961	*
1	1374543	1375726	1184	*
1	1398982	1400561	1580	*
1	1406756	1408002	1247	*
1	1431787	1432260	474	*
1	1440775	1441638	864	*
1	1471310	1472138	829	*
1	1504744	1505808	1065	*
1	1511377	1512515	1139	*
1	1554528	1555480	953	*
1	1574119	1575522	1404	*
1	1599566	1599898	333	*
1	1615020	1616806	1787	*
1	1627135	1629023	1889	*
1	1658638	1659551	914	*
1	1686192	1687042	851	*
1	1692232	1693497	1266	*
1	1723975	1724848	874	*
1	1740905	1741449	545	*
1	1758656	1759760	1105	*
1	1777572	1779226	1655	*
1	1782640	1783278	639	*
1	1859056	1859699	644	*
1	1889863	1892110	2248	*
1	1894472	1894907	436	*
1	1906252	1906583	332	*
1	1906701	1907846	1146	*
1	1908441	1909502	1062	*
1	1918904	1920038	1135	*
1	1943914	1944512	599	*
1	1959766	1960491	726	*
1	1968904	1969753	850	*
1	2015067	2015538	472	*
1	2044772	2045202	431	*
1	2049509	2050984	1476	*
1	2104314	2105484	1171	*
1	2132751	2133974	1224	*
1	2139814	2140513	700	*
1	2174206	2174796	591	*
1	2189310	2190640	1331	*
1	2194635	2195705	1071	*
1	2199132	2199769	638	*
1	2205198	2205561	364	*
1	2207151	2208883	1733	*
1	2212446	2213411	966	*
1	2227475	2228063	589	*
1	2231641	2232155	515	*
1	2234247	2235013	767	*
1	2311434	2311897	464	*
1	2314299	2315058	760	*
1	2322245	2323046	802	*
1	2330775	2331416	642	*
1	2360593	2361480	888	*
1	2372707	2373232	526	*
1	2381634	2382497	864	*
1	2391028	2392358	1331	*
1	2411974	2413634	1661	*
1	2447869	2448492	624	*
1	2801465	2802264	800	*
1	2821936	2822463	528	*
1	3066148	3066716	569	*
1	3312900	3313831	932	*
1	3319889	3320458	570	*
1	3348811	3349565	755	*
1	3410181	3410703	523	*
1	3419392	3419922	531	*
1	3424714	3425047	334	*
1	3453133	3455162	2030	*
1	3471193	3472103	911	*
1	3481776	3482865	1090	*
1	3491216	3492198	983	*
1	3502849	3503402	554	*
1	3503805	3505233	1429	*
1	3509852	3511082	1231	*
1	3515851	3516756	906	*
1	3530057	3532058	2002	*
1	3542769	3543906	1138	*
1	3547216	3548790	1575	*
1	3554792	3555757	966	*
1	3610788	3612021	1234	*
1	3618804	3619471	668	*
1	3624079	3625878	1800	*
1	3649696	3650325	630	*
1	3651956	3653157	1202	*
1	3668649	3669380	732	*
1	3695613	3695975	363	*
1	3703118	3703903	786	*
1	3746565	3747631	1067	*
1	3772048	3773306	1259	*
1	3775458	3776302	845	*
1	3795683	3796987	1305	*
1	3801472	3801722	251	*
1	3811303	3811734	432	*
1	3856573	3858073	1501	*
1	3869731	3870213	483	*
1	3899715	3901622	1908	*
1	3910615	3911391	777	*
1	4652593	4653114	522	*
1	5424826	5425286	461	*
1	5745773	5746322	550	*
1	5927784	5928402	619	*
1	5975204	5975678	475	*
1	5991500	5993573	2074	*
1	6025149	6026799	1651	*
1	6108874	6109516	643	*
1	6111602	6112075	474	*
1	6127488	6128345	858	*
1	6148351	6149031	681	*
1	6157297	6158286	990	*
1	6198902	6199891	990	*
1	6204976	6207032	2057	*
1	6234471	6236349	1879	*
1	6245022	6245845	824	*
1	6259631	6260878	1248	*
1	6260980	6261618	639	*
1	6300172	6300985	814	*
1	6331374	6332065	692	*
1	6342070	6342435	366	*
1	6343322	6344109	788	*
1	6353806	6354546	741	*
1	6363070	6363694	625	*
1	6392649	6394234	1586	*
1	6419599	6420446	848	*
1	6422834	6423153	320	*
1	6423279	6423787	509	*
1	6427402	6428267	866	*
1	6437026	6437592	567	*
1	6440289	6440884	596	*
1	6448189	6449191	1003	*
1	6464388	6464936	549	*
1	6475340	6476079	740	*
1	6488971	6489615	645	*
1	6489977	6491879	1903	*
1	6497309	6497899	591	*
1	6501893	6502632	740	*
1	6523628	6523996	369	*
1	6553714	6554826	1113	*
1	6578117	6578575	459	*
1	6579510	6581199	1690	*
1	6600853	6603780	2928	*
1	6612719	6614584	1866	*
1	6624646	6626071	1426	*
1	6634630	6635035	406	*
1	6701107	6702293	1187	*
1	6719981	6720322	342	*
1	6724497	6725237	741	*
1	6743570	6744171	602	*
1	6770634	6771121	488	*
1	6784200	6785559	1360	*
1	6795470	6796489	1020	*
1	6859796	6860824	1029	*
1	6889902	6890247	346	*
1	6935124	6935627	504	*
1	6960293	6960881	589	*
1	6962328	6963898	1571	*
1	6991259	6991696	438	*
1	6998246	6998688	443	*
1	7046309	7046673	365	*
1	7070169	7070775	607	*
1	7117378	7118437	1060	*
1	7121535	7122160	626	*
1	7127442	7128381	940	*
1	7136083	7137013	931	*
1	7223401	7224338	938	*
1	7265697	7266742	1046	*
1	7299235	7300023	789	*
1	7300881	7301791	911	*
1	7334432	7335945	1514	*
1	7341092	7342134	1043	*
1	7379373	7379913	541	*
1	7380593	7381050	458	*
1	7388765	7390444	1680	*
1	7401760	7402573	814	*
1	7424355	7425284	930	*
1	7469096	7470004	909	*
1	7470711	7472124	1414	*
1	7477104	7477634	531	*
1	7478923	7479252	330	*
1	7482791	7483201	411	*
1	7526348	7527385	1038	*
1	7533952	7534720	769	*
1	7539521	7540178	658	*
1	7549214	7550579	1366	*
1	7574150	7574835	686	*
1	7645275	7645917	643	*
1	7646965	7647736	772	*
1	7667495	7668131	637	*
1	7669341	7669808	468	*
1	7679907	7680791	885	*
1	7704431	7704999	569	*
1	7752430	7753168	739	*
1	7770878	7772122	1245	*
1	7783184	7784620	1437	*
1	7810352	7810763	412	*
1	7869305	7870027	723	*
1	7893663	7894857	1195	*
1	7902615	7903101	487	*
1	7940756	7941062	307	*
1	7953808	7954654	847	*
1	7961069	7962249	1181	*
1	7975117	7975655	539	*
1	8004364	8005703	1340	*
1	8015022	8015547	526	*
1	8017513	8017907	395	*
1	8020068	8020354	287	*
1	8025785	8026868	1084	*
1	8027985	8028595	611	*
1	8040413	8041025	613	*
1	8045994	8046410	417	*
1	8047657	8048477	821	*
1	8055878	8056407	530	*
1	8061195	8061867	673	*
1	8061935	8062407	473	*
1	8077116	8077582	467	*
1	8078136	8078734	599	*
1	8091420	8092118	699	*
1	8094411	8094863	453	*
1	8097226	8097867	642	*
1	8116613	8117267	655	*
1	8120994	8121894	901	*
1	8133137	8133603	467	*
1	8133663	8134415	753	*
1	8137578	8138238	661	*
1	8154657	8155050	394	*
1	8174197	8174719	523	*
1	8174846	8175224	379	*
1	8182038	8183022	985	*
1	8189854	8190264	411	*
1	8197588	8198358	771	*
1	8201304	8201925	622	*
1	8202132	8202876	745	*
1	8204236	8204813	578	*
1	8211685	8212532	848	*
1	8259092	8260192	1101	*
1	8314300	8314887	588	*
1	8317905	8318450	546	*
1	8343017	8344179	1163	*
1	8348840	8349329	490	*
1	8396850	8397345	496	*
1	8412186	8412832	647	*
1	8423270	8424713	1444	*
1	8438974	8439803	830	*
1	8525294	8526312	1019	*
1	8625952	8627129	1178	*
1	8661254	8662226	973	*
1	8675004	8675367	364	*
1	8701016	8701798	783	*
1	8702909	8703816	908	*
1	8706977	8707348	372	*
1	8712237	8713250	1014	*
1	8733423	8734068	646	*
1	8816898	8818281	1384	*
1	8822607	8823110	504	*
1	8848683	8849453	771	*
1	8858062	8858534	473	*
1	8873548	8874210	663	*
1	8877933	8879533	1601	*
1	8889230	8890899	1670	*
1	8899919	8900314	396	*
1	8903579	8904541	963	*
1	8917844	8918439	596	*
1	8939493	8940014	522	*
1	8962833	8963393	561	*
1	8973981	8974507	527	*
1	8986078	8986780	703	*
1	9004920	9005443	524	*
1	9067223	9067584	362	*
1	9078641	9079380	740	*
1	9080520	9081292	773	*
1	9084793	9085578	786	*
1	9101470	9101929	460	*
1	9110513	9111399	887	*
1	9127903	9129958	2056	*
1	9145033	9145618	586	*
1	9162872	9164496	1625	*
1	9181097	9181862	766	*
1	9181924	9183115	1192	*
1	9234195	9235472	1278	*
1	9266950	9267583	634	*
1	9270420	9271016	597	*
1	9275267	9276071	805	*
1	9280376	9280958	583	*
1	9290072	9290823	752	*
1	9291965	9293323	1359	*
1	9299959	9300685	727	*
1	9302753	9303510	758	*
1	9315465	9316488	1024	*
1	9317597	9318278	682	*
1	9321257	9321910	654	*
1	9350191	9350998	808	*
1	9376490	9377375	886	*
1	9384476	9385315	840	*
1	9388541	9389181	641	*
1	9400414	9401140	727	*
1	9401764	9402275	512	*
1	9412870	9414122	1253	*
1	9428603	9429560	958	*
1	9438518	9439129	612	*
1	9455806	9456310	505	*
1	9472816	9473614	799	*
1	9490894	9491430	537	*
1	9494986	9495784	799	*
1	9539090	9540446	1357	*
1	9561523	9561841	319	*
1	9588296	9589863	1568	*
1	9615484	9615915	432	*
1	9626916	9627594	679	*
1	9644722	9645058	337	*
1	9687273	9688127	855	*
1	9688971	9689868	898	*
1	9700335	9700731	397	*
1	9702281	9702570	290	*
1	9718918	9719697	780	*
1	9724915	9725461	547	*
1	9792219	9792931	713	*
1	9798174	9798933	760	*
1	9822945	9824831	1887	*
1	9825082	9826001	920	*
1	9842703	9843525	823	*
1	9867313	9868019	707	*
1	9874899	9875365	467	*
1	9877890	9878421	532	*
1	9881765	9882250	486	*
1	9890205	9890814	610	*
1	9893133	9893536	404	*
1	9909928	9911267	1340	*
1	9942769	9943830	1062	*
1	9950267	9950823	557	*
1	9960929	9961587	659	*
1	9996925	9998172	1248	*
1	10032441	10033843	1403	*
1	10055698	10056087	390	*
1	10074361	10074773	413	*
1	10108046	10108764	719	*
1	10122911	10123484	574	*
1	10195477	10196054	578	*
1	10209779	10212044	2266	*
1	10339847	10340141	295	*
1	10377378	10377862	485	*
1	10387423	10388310	888	*
1	10398356	10399998	1643	*
1	10415151	10415731	581	*
1	10430077	10431352	1276	*
1	10459063	10459606	544	*
1	10471813	10472800	988	*
1	10474735	10475700	966	*
1	10494496	10495377	882	*
1	10507407	10507820	414	*
1	10510433	10511175	743	*
1	10528031	10529440	1410	*
1	10537206	10537706	501	*
1	10575675	10576004	330	*
1	10599118	10599942	825	*
1	10634637	10636087	1451	*
1	10646379	10646655	277	*
1	10693929	10695343	1415	*
1	10724082	10724594	513	*
1	10727679	10728320	642	*
1	10731038	10731373	336	*
1	10755748	10756453	706	*
1	10765717	10766403	687	*
1	10779229	10779628	400	*
1	10788585	10789154	570	*
1	10796179	10796952	774	*
1	10804061	10804803	743	*
1	10824813	10825292	480	*
1	10831000	10831538	539	*
1	10835880	10836292	413	*
1	10837172	10837769	598	*
1	10866749	10867642	894	*
1	10900296	10901854	1559	*
1	10909931	10910387	457	*
1	10943934	10944683	750	*
1	10960833	10961559	727	*
1	10975681	10976291	611	*
1	10980024	10980511	488	*
1	10990109	10990651	543	*
1	11011872	11013437	1566	*
1	11037606	11038025	420	*
1	11046127	11046633	507	*
1	11059117	11060603	1487	*
1	11099133	11100228	1096	*
1	11134035	11135226	1192	*
1	11158663	11159345	683	*
1	11178034	11178938	905	*
1	11180208	11180912	705	*
1	11262063	11263030	968	*
1	11272658	11274077	1420	*
1	11281593	11282600	1008	*
1	11292649	11293254	606	*
1	11293850	11294223	374	*
1	11307820	11308237	418	*
1	11337512	11337881	370	*
1	11478494	11479588	1095	*
1	11635866	11636155	290	*
1	11642273	11642754	482	*
1	11645785	11646366	582	*
1	11653109	11653722	614	*
1	11654254	11655183	930	*
1	11663973	11664712	740	*
1	11680463	11681878	1416	*
1	11692789	11693789	1001	*
1	11733399	11733688	290	*
1	11735711	11737331	1621	*
1	11748970	11749510	541	*
1	11784938	11785657	720	*
1	11787344	11788055	712	*
1	11790722	11791460	739	*
1	11803050	11803896	847	*
1	11805071	11806570	1500	*
1	11821324	11822016	693	*
1	11838148	11839010	863	*
1	11859043	11859626	584	*
1	11893787	11894275	489	*
1	11901384	11901862	479	*
1	11908093	11909956	1864	*
1	11918683	11919494	812	*
1	11926240	11926718	479	*
1	11934214	11935129	916	*
1	11938971	11939627	657	*
1	11966737	11967533	797	*
1	11979562	11980911	1350	*
1	12001972	12002601	630	*
1	12019001	12020366	1366	*
1	12030952	12031696	745	*
1	12040431	12041053	623	*
1	12044134	12044637	504	*
1	12051926	12052579	654	*
1	12075523	12076113	591	*
1	12132043	12132725	683	*
1	12132882	12133544	663	*
1	12135637	12135990	354	*
1	12143348	12144204	857	*
1	12153069	12153846	778	*
1	12161573	12162464	892	*
1	12166790	12167349	560	*
1	12208671	12209380	710	*
1	12229681	12231431	1751	*
1	12271909	12272452	544	*
1	12454400	12455480	1081	*
1	12477980	12478921	942	*
1	12480741	12481265	525	*
1	12518758	12519654	897	*
1	12539806	12540852	1047	*
1	12541386	12541889	504	*
1	12548787	12550359	1573	*
1	12556347	12556919	573	*
1	12572607	12574576	1970	*
1	12579981	12580692	712	*
1	12588099	12588763	665	*
1	12593571	12594028	458	*
1	12595219	12596872	1654	*
1	12601898	12602515	618	*
1	12604162	12604753	592	*
1	12615967	12616882	916	*
1	12617960	12619712	1753	*
1	12636223	12637246	1024	*
1	12658957	12659366	410	*
1	12851709	12852267	559	*
1	13665648	13666029	382	*
1	13748732	13750139	1408	*
1	13766881	13767522	642	*
1	13965816	13966198	383	*
1	14055361	14056196	836	*
1	14108724	14109514	791	*
1	14113157	14113768	612	*
1	14140716	14141435	720	*
1	14149455	14149777	323	*
1	14190468	14190932	465	*
1	14254226	14254761	536	*
1	14282614	14283198	585	*
1	14291105	14291750	646	*
1	14304282	14304907	626	*
1	14320462	14320971	510	*
1	14332168	14332775	608	*
1	14340017	14340847	831	*
1	14346009	14346742	734	*
1	14360856	14361461	606	*
1	14366242	14366839	598	*
1	14390603	14391221	619	*
1	14413779	14414244	466	*
1	14486315	14487264	950	*
1	14517099	14517996	898	*
1	14522356	14523291	936	*
1	14542900	14543797	898	*
1	14597755	14599213	1459	*
1	14625713	14626295	583	*
1	14653291	14654039	749	*
1	14742125	14742997	873	*
1	14765539	14766346	808	*
1	14810644	14811447	804	*
1	14815019	14815876	858	*
1	14822328	14823168	841	*
1	14826134	14826591	458	*
1	14894786	14895384	599	*
1	14910965	14911786	822	*
1	14923715	14925299	1585	*
1	14929505	14930259	755	*
1	14945181	14946019	839	*
1	14946698	14947501	804	*
1	14954053	14954612	560	*
1	14968209	14969017	809	*
1	14977369	14977855	487	*
1	14987942	14988697	756	*
1	14996003	14997073	1071	*
1	15003169	15003818	650	*
1	15014261	15014951	691	*
1	15027616	15028537	922	*
1	15046417	15047043	627	*
1	15056824	15057234	411	*
1	15089324	15089803	480	*
1	15090248	15090843	596	*
1	15100065	15100737	673	*
1	15128509	15129006	498	*
1	15152356	15154372	2017	*
1	15178738	15179568	831	*
1	15200359	15201143	785	*
1	15247004	15247635	632	*
1	15261223	15261794	572	*
1	15272351	15273060	710	*
1	15304747	15305225	479	*
1	15323147	15324233	1087	*
1	15337465	15338483	1019	*
1	15352323	15352815	493	*
1	15356070	15357246	1177	*
1	15409387	15410475	1089	*
1	15415943	15416650	708	*
1	15426811	15427159	349	*
1	15459741	15460318	578	*
1	15501440	15501773	334	*
1	15523887	15525506	1620	*
1	15526405	15527311	907	*
1	15584353	15585402	1050	*
1	15603059	15603985	927	*
1	15616785	15618245	1461	*
1	15678588	15678958	371	*
1	15680743	15681616	874	*
1	15741179	15741908	730	*
1	15758554	15759653	1100	*
1	15786581	15787196	616	*
1	15788087	15788587	501	*
1	15795094	15795544	451	*
1	15796625	15797216	592	*
1	15799045	15799407	363	*
1	15799903	15801453	1551	*
1	15815419	15815963	545	*
1	15825420	15826173	754	*
1	15833130	15833621	492	*
1	15834326	15836455	2130	*
1	15847117	15848701	1585	*
1	15849304	15850279	976	*
1	15865828	15866221	394	*
1	15885824	15886837	1014	*
1	15919342	15919712	371	*
1	15923278	15923631	354	*
1	15924563	15925164	602	*
1	15939269	15939719	451	*
1	15949076	15950295	1220	*
1	15952391	15953079	689	*
1	15975281	15976317	1037	*
1	15994529	15994896	368	*
1	16006963	16007450	488	*
1	16012678	16013784	1107	*
1	16016008	16016549	542	*
1	16032517	16033341	825	*
1	16038491	16038872	382	*
1	16048548	16049130	583	*
1	16055604	16056429	826	*
1	16075984	16077275	1292	*
1	16078988	16079366	379	*
1	16082355	16082840	486	*
1	16112869	16113339	471	*
1	16139452	16140156	705	*
1	16143538	16144333	796	*
1	16144964	16147236	2273	*
1	16154761	16155375	615	*
1	16155506	16156450	945	*
1	16164165	16164723	559	*
1	16167357	16168143	787	*
1	16172989	16173943	955	*
1	16175575	16176575	1001	*
1	16181626	16182581	956	*
1	16187651	16188220	570	*
1	16188964	16189376	413	*
1	16206177	16207343	1167	*
1	16217050	16217962	913	*
1	16236106	16237713	1608	*
1	16248668	16249126	459	*
1	16249884	16250243	360	*
1	16254083	16254986	904	*
1	16324380	16324811	432	*
1	16351876	16353135	1260	*
1	16366904	16368087	1184	*
1	16375370	16376265	896	*
1	16383811	16384288	478	*
1	16386161	16387304	1144	*
1	16440167	16441565	1399	*
1	16498666	16500150	1485	*
1	16513507	16514594	1088	*
1	16534626	16535756	1131	*
1	16612552	16614056	1505	*
1	16620931	16621392	462	*
1	16623882	16624534	653	*
1	16643712	16645227	1516	*
1	16677899	16678451	553	*
1	16707452	16708093	642	*
1	16727178	16727999	822	*
1	16872498	16873302	805	*
1	16888816	16889941	1126	*
1	16895294	16897014	1721	*
1	16903793	16905746	1954	*
1	16913517	16914677	1161	*
1	16948145	16949360	1216	*
1	16951677	16952027	351	*
1	16960553	16961279	727	*
1	16966867	16967925	1059	*
1	16971794	16972342	549	*
1	16979906	16981096	1191	*
1	16984636	16985103	468	*
1	17003611	17004611	1001	*
1	17010670	17012326	1657	*
1	17027412	17028216	805	*
1	17053713	17054709	997	*
1	17059495	17060105	611	*
1	17113674	17114429	756	*
1	17119320	17119701	382	*
1	17121267	17121719	453	*
1	17125734	17126124	391	*
1	17128290	17128882	593	*
1	17162490	17163363	874	*
1	17167940	17168868	929	*
1	17169331	17169681	351	*
1	17186234	17186985	752	*
1	17189917	17190658	742	*
1	17191254	17191765	512	*
1	17207647	17208481	835	*
1	17211949	17213182	1234	*
1	17226295	17226839	545	*
1	17232916	17234174	1259	*
1	17236870	17237637	768	*
1	17250434	17251220	787	*
1	17251538	17252104	567	*
1	17259120	17259719	600	*
1	17276452	17277153	702	*
1	17287256	17287928	673	*
1	17289625	17290293	669	*
1	17304161	17304846	686	*
1	17335865	17336410	546	*
1	17347916	17348683	768	*
1	17369445	17369820	376	*
1	17405996	17406645	650	*
1	17437683	17438846	1164	*
1	17439728	17440161	434	*
1	17460082	17461014	933	*
1	17475689	17476358	670	*
1	17487835	17488336	502	*
1	17494106	17494794	689	*
1	17502266	17502844	579	*
1	17531556	17532591	1036	*
1	17539548	17540686	1139	*
1	17551003	17552371	1369	*
1	17561214	17562027	814	*
1	17563954	17564303	350	*
1	17564365	17565005	641	*
1	17569099	17570376	1278	*
1	17587617	17588847	1231	*
1	17606804	17607357	554	*
1	17624172	17625389	1218	*
1	17653757	17654273	517	*
1	17696377	17696828	452	*
1	17765465	17766422	958	*
1	17768404	17769344	941	*
1	17826036	17826603	568	*
1	17866322	17866929	608	*
1	17874029	17874623	595	*
1	18021987	18022660	674	*
1	18091829	18092439	611	*
1	18480366	18481218	853	*
1	18597247	18597906	660	*
1	18618494	18619217	724	*
1	18681384	18681701	318	*
1	18820617	18821280	664	*
1	18875071	18875773	703	*
1	18884141	18884538	398	*
1	18902010	18903316	1307	*
1	18912864	18913457	594	*
1	18922154	18922870	717	*
1	18926330	18927005	676	*
1	18941064	18942032	969	*
1	18949098	18950352	1255	*
1	18955534	18957344	1811	*
1	18965758	18966132	375	*
1	19009757	19011562	1806	*
1	19033865	19034559	695	*
1	19045205	19045853	649	*
1	19054297	19054688	392	*
1	19066135	19066684	550	*
1	19066849	19067791	943	*
1	19096276	19096568	293	*
1	19203352	19203846	495	*
1	19209590	19211158	1569	*
1	19251137	19252523	1387	*
1	19288437	19289408	972	*
1	19311134	19313010	1877	*
1	19344362	19344750	389	*
1	19440420	19440906	487	*
1	19450636	19451373	738	*
1	19469424	19469905	482	*
1	19484224	19486305	2082	*
1	19596355	19597832	1478	*
1	19622156	19622510	355	*
1	19635709	19636072	364	*
1	19643141	19644414	1274	*
1	19650955	19651503	549	*
1	19653565	19654138	574	*
1	19659577	19660085	509	*
1	19676529	19676950	422	*
1	19704449	19705047	599	*
1	19715481	19716121	641	*
1	19735844	19736156	313	*
1	19754400	19754919	520	*
1	19758145	19758878	734	*
1	19765414	19766060	647	*
1	19799234	19800597	1364	*
1	19860987	19861642	656	*
1	19863730	19864339	610	*
1	19866755	19867237	483	*
1	19882055	19883150	1096	*
1	19918031	19918351	321	*
1	19949006	19949346	341	*
1	20100812	20101293	482	*
1	20124411	20125000	590	*
1	20151993	20152845	853	*
1	20195206	20195523	318	*
1	20279461	20279911	451	*
1	20358691	20359269	579	*
1	20411098	20411858	761	*
1	20440786	20441117	332	*
1	20476291	20476896	606	*
1	20485465	20486994	1530	*
1	20493766	20494162	397	*
1	20507401	20508435	1035	*
1	20522313	20522832	520	*
1	20530864	20531550	687	*
1	20552351	20552849	499	*
1	20575231	20576935	1705	*
1	20588584	20590018	1435	*
1	20601244	20602013	770	*
1	20604179	20604725	547	*
1	20612071	20612798	728	*
1	20613481	20614288	808	*
1	20633243	20634141	899	*
1	20634257	20635046	790	*
1	20639885	20640595	711	*
1	20661066	20662136	1071	*
1	20696380	20697367	988	*
1	20717453	20718411	959	*
1	20732027	20733644	1618	*
1	20786098	20788270	2173	*
1	20847322	20848740	1419	*
1	20896792	20897292	501	*
1	21022162	21022918	757	*
1	21063845	21064598	754	*
1	21083118	21083679	562	*
1	21091102	21091492	391	*
1	21149444	21150410	967	*
1	21175490	21177489	2000	*
1	21194947	21195744	798	*
1	21217853	21218339	487	*
1	21232003	21232631	629	*
1	21255189	21255735	547	*
1	21261620	21263066	1447	*
1	21268256	21269101	846	*
1	21289638	21290807	1170	*
1	21294376	21295285	910	*
1	21302680	21303526	847	*
1	21308781	21309668	888	*
1	21311135	21311414	280	*
1	21316963	21317922	960	*
1	21318635	21319060	426	*
1	21324156	21325176	1021	*
1	21331900	21332544	645	*
1	21335776	21336219	444	*
1	21337891	21339567	1677	*
1	21344600	21346055	1456	*
1	21355897	21356447	551	*
1	21368254	21369076	823	*
1	21370581	21371056	476	*
1	21378995	21379547	553	*
1	21439720	21440506	787	*
1	21490758	21491169	412	*
1	21508974	21509569	596	*
1	21539908	21540339	432	*
1	21574058	21575164	1107	*
1	21586691	21587723	1033	*
1	21594584	21595098	515	*
1	21607489	21608286	798	*
1	21626812	21627423	612	*
1	21631873	21632619	747	*
1	21638461	21639942	1482	*
1	21651200	21652115	916	*
1	21659101	21659703	603	*
1	21703356	21703912	557	*
1	21764241	21765592	1352	*
1	21782237	21784002	1766	*
1	21801076	21801495	420	*
1	21818729	21819036	308	*
1	21861983	21862540	558	*
1	21869591	21870469	879	*
1	21896716	21897145	430	*
1	21909276	21910433	1158	*
1	21920152	21921400	1249	*
1	21927374	21927930	557	*
1	21930959	21931946	988	*
1	21942937	21943490	554	*
1	21956458	21957469	1012	*
1	21963828	21964473	646	*
1	22005197	22005989	793	*
1	22018988	22019542	555	*
1	22025064	22026321	1258	*
1	22039627	22040385	759	*
1	22052379	22053831	1453	*
1	22131781	22132953	1173	*
1	22142253	22142959	707	*
1	22143114	22143879	766	*
1	22275669	22276255	587	*
1	22332832	22333503	672	*
1	22341964	22342638	675	*
1	22388654	22389929	1276	*
1	22414193	22414777	585	*
1	22420312	22420878	567	*
1	22428619	22429434	816	*
1	22451589	22452932	1344	*
1	22600407	22601063	657	*
1	22641894	22642544	651	*
1	22689469	22689950	482	*
1	22704299	22704901	603	*
1	22739473	22740308	836	*
1	22746049	22746608	560	*
1	22747311	22747773	463	*
1	22750130	22751001	872	*
1	22780742	22781058	317	*
1	22831792	22832633	842	*
1	22870279	22871008	730	*
1	22930191	22930681	491	*
1	22969272	22969755	484	*
1	22976380	22977001	622	*
1	23010438	23011319	882	*
1	23019114	23020418	1305	*
1	23167335	23169076	1742	*
1	23177351	23178211	861	*
1	23188330	23189391	1062	*
1	23194371	23195267	897	*
1	23196722	23197414	693	*
1	23198244	23198767	524	*
1	23214761	23215038	278	*
1	23216744	23217850	1107	*
1	23224725	23225570	846	*
1	23273294	23273801	508	*
1	23282753	23283391	639	*
1	23343329	23345084	1756	*
1	23367593	23368639	1047	*
1	23368711	23369986	1276	*
1	23402896	23403291	396	*
1	23403664	23404459	796	*
1	23411606	23412166	561	*
1	23423525	23425062	1538	*
1	23451561	23452623	1063	*
1	23478807	23479379	573	*
1	23483320	23485033	1714	*
1	23496919	23497657	739	*
1	23528112	23528918	807	*
1	23530546	23531773	1228	*
1	23539633	23540327	695	*
1	23544678	23545244	567	*
1	23554544	23555286	743	*
1	23559122	23559814	693	*
1	23562317	23562661	345	*
1	23567780	23568659	880	*
1	23576552	23577933	1382	*
1	23585314	23586214	901	*
1	23586573	23587066	494	*
1	23591510	23592062	553	*
1	23593288	23594170	883	*
1	23619363	23620039	677	*
1	23634630	23635819	1190	*
1	23637391	23637964	574	*
1	23651020	23651708	689	*
1	23657671	23658008	338	*
1	23691474	23692409	936	*
1	23718483	23718886	404	*
1	23742967	23744272	1306	*
1	23751150	23751640	491	*
1	23771895	23772615	721	*
1	23777830	23778882	1053	*
1	23779725	23780374	650	*
1	23790103	23790471	369	*
1	23790727	23791506	780	*
1	23799370	23801137	1768	*
1	23809687	23810074	388	*
1	23824832	23825756	925	*
1	23838145	23838876	732	*
1	23854445	23854969	525	*
1	23867649	23868838	1190	*
1	23907662	23908201	540	*
1	23916762	23917192	431	*
1	23919879	23920518	640	*
1	23951496	23952206	711	*
1	23958938	23960235	1298	*
1	23979810	23981084	1275	*
1	24003302	24003919	618	*
1	24008617	24008921	305	*
1	24009251	24009943	693	*
1	24018550	24019330	781	*
1	24022511	24023200	690	*
1	24028085	24028432	348	*
1	24045939	24046826	888	*
1	24047133	24047506	374	*
1	24048419	24048926	508	*
1	24070800	24071368	569	*
1	24102923	24103397	475	*
1	24107828	24108245	418	*
1	24108296	24109312	1017	*
1	24112535	24112890	356	*
1	24117625	24118142	518	*
1	24119780	24120754	975	*
1	24142521	24143471	951	*
1	24149760	24150928	1169	*
1	24186977	24187825	849	*
1	24191942	24192278	337	*
1	24201968	24202521	554	*
1	24236205	24237213	1009	*
1	24266230	24267269	1040	*
1	24283582	24284582	1001	*
1	24289817	24290502	686	*
1	24294268	24295467	1200	*
1	24321437	24322655	1219	*
1	24352004	24352717	714	*
1	24362935	24363373	439	*
1	24364571	24365744	1174	*
1	24391315	24391622	308	*
1	24392167	24392664	498	*
1	24413288	24413938	651	*
1	24415304	24416314	1011	*
1	24502088	24503418	1331	*
1	24515445	24516124	680	*
1	24541070	24541321	252	*
1	24559048	24559766	719	*
1	24587152	24587706	555	*
1	24635174	24635561	388	*
1	24642427	24644301	1875	*
1	24683492	24684217	726	*
1	24688544	24689095	552	*
1	24705189	24705996	808	*
1	24713003	24713828	826	*
1	24744812	24746085	1274	*
1	24770179	24770566	388	*
1	24830704	24831045	342	*
1	24847864	24848828	965	*
1	24862017	24862776	760	*
1	24898113	24898497	385	*
1	24929399	24930722	1324	*
1	24932248	24932619	372	*
1	24949183	24949771	589	*
1	24970438	24970818	381	*
1	25017339	25018005	667	*
1	25022140	25023287	1148	*
1	25030730	25031114	385	*
1	25031849	25032724	876	*
1	25101447	25101968	522	*
1	25182567	25182971	405	*
1	25231990	25232945	956	*
1	25233085	25233514	430	*
1	25239530	25240489	960	*
1	25246672	25248119	1448	*
1	25267737	25268359	623	*
1	25338076	25339022	947	*
1	25352163	25352631	469	*
1	25371496	25372280	785	*
1	25429885	25431711	1827	*
1	25506598	25507321	724	*
1	25523560	25523874	315	*
1	25543274	25544343	1070	*
1	25544567	25545108	542	*
1	25549430	25550161	732	*
1	25556513	25557303	791	*
1	25568313	25569427	1115	*
1	25573397	25573901	505	*
1	25608449	25608913	465	*
1	25615906	25617256	1351	*
1	25688347	25689218	872	*
1	25695033	25695497	465	*
1	25695930	25696374	445	*
1	25743371	25744546	1176	*
1	25799792	25800920	1129	*
1	25810544	25811300	757	*
1	25819518	25821107	1590	*
1	25858549	25859886	1338	*
1	25874866	25876260	1395	*
1	25890314	25890902	589	*
1	25892241	25892942	702	*
1	25895386	25895857	472	*
1	25905061	25905316	256	*
1	25905380	25907168	1789	*
1	25922693	25923479	787	*
1	25997588	25998748	1161	*
1	26034905	26036476	1572	*
1	26094244	26095183	940	*
1	26110681	26112652	1972	*
1	26123205	26123765	561	*
1	26145047	26145643	597	*
1	26161585	26162349	765	*
1	26169536	26170467	932	*
1	26177102	26177665	564	*
1	26218923	26219672	750	*
1	26233605	26235238	1634	*
1	26279541	26280738	1198	*
1	26284725	26285323	599	*
1	26306226	26307167	942	*
1	26321113	26322053	941	*
1	26336011	26337110	1100	*
1	26357123	26357531	409	*
1	26358758	26359155	398	*
1	26377927	26378853	927	*
1	26387152	26387750	599	*
1	26391460	26391852	393	*
1	26396288	26396614	327	*
1	26404927	26405815	889	*
1	26416868	26417453	586	*
1	26431878	26432824	947	*
1	26471523	26473350	1828	*
1	26500042	26501775	1734	*
1	26529378	26531612	2235	*
1	26620096	26621726	1631	*
1	26636488	26637204	717	*
1	26677310	26678043	734	*
1	26692236	26693384	1149	*
1	26695347	26696412	1066	*
1	26697836	26698517	682	*
1	26705491	26706347	857	*
1	26723158	26724075	918	*
1	26771298	26772284	987	*
1	26787513	26788691	1179	*
1	26788922	26789410	489	*
1	26799466	26800449	984	*
1	26826123	26827498	1376	*
1	26848815	26849883	1069	*
1	26853119	26853478	360	*
1	26862846	26863763	918	*
1	26863807	26865602	1796	*
1	26877976	26878295	320	*
1	26889574	26890719	1146	*
1	26899806	26900701	896	*
1	26907153	26908010	858	*
1	26921228	26922407	1180	*
1	26949835	26950338	504	*
1	26966882	26967380	499	*
1	26993217	26994425	1209	*
1	26997685	26998111	427	*
1	26998958	27000019	1062	*
1	27009468	27010283	816	*
1	27010765	27011385	621	*
1	27012674	27013409	736	*
1	27031252	27031971	720	*
1	27044510	27045065	556	*
1	27045914	27046222	309	*
1	27097424	27097718	295	*
1	27099045	27100195	1151	*
1	27102718	27103172	455	*
1	27111879	27112614	736	*
1	27122490	27123086	597	*
1	27141601	27142152	552	*
1	27154595	27155731	1137	*
1	27192010	27193117	1108	*
1	27233956	27235731	1776	*
1	27284547	27285045	499	*
1	27296719	27297166	448	*
1	27300602	27301338	737	*
1	27306836	27307452	617	*
1	27321827	27322755	929	*
1	27349204	27350282	1079	*
1	27365369	27367374	2006	*
1	27380735	27381428	694	*
1	27392115	27393029	915	*
1	27395439	27395768	330	*
1	27416547	27416971	425	*
1	27436557	27437066	510	*
1	27489646	27490941	1296	*
1	27525501	27526180	680	*
1	27528053	27529353	1301	*
1	27540058	27540916	859	*
1	27542266	27543296	1031	*
1	27556780	27558321	1542	*
1	27568181	27569325	1145	*
1	27575228	27576279	1052	*
1	27589707	27590597	891	*
1	27590983	27591547	565	*
1	27601738	27602450	713	*
1	27603412	27604497	1086	*
1	27643902	27644223	322	*
1	27650582	27651201	620	*
1	27658778	27660358	1581	*
1	27663150	27663403	254	*
1	27671884	27672859	976	*
1	27686401	27687065	665	*
1	27725374	27726628	1255	*
1	27772727	27773948	1222	*
1	27817154	27817707	554	*
1	27830323	27831513	1191	*
1	27857866	27858815	950	*
1	27872181	27872957	777	*
1	27875140	27875654	515	*
1	27914092	27915116	1025	*
1	27934773	27935353	581	*
1	27959345	27960456	1112	*
1	27968728	27969057	330	*
1	28087701	28089154	1454	*
1	28104951	28105555	605	*
1	28153147	28153545	399	*
1	28208912	28209208	297	*
1	28232503	28233166	664	*
1	28235593	28236834	1242	*
1	28247109	28247610	502	*
1	28249420	28249811	392	*
1	28259088	28260737	1650	*
1	28296677	28297228	552	*
1	28313739	28314459	721	*
1	28328723	28329757	1035	*
1	28346114	28346703	590	*
1	28351556	28352508	953	*
1	28359674	28359999	326	*
1	28369382	28370648	1267	*
1	28391811	28392574	764	*
1	28409893	28410321	429	*
1	28416435	28416837	403	*
1	28417377	28418031	655	*
1	28437268	28438501	1234	*
1	28449913	28450480	568	*
1	28471491	28471999	509	*
1	28505507	28506693	1187	*
1	28517776	28519313	1538	*
1	28552562	28554021	1460	*
1	28581197	28582353	1157	*
1	28591900	28593139	1240	*
1	28594637	28595279	643	*
1	28601494	28602232	739	*
1	28642197	28643760	1564	*
1	28648005	28648458	454	*
1	28648518	28649398	881	*
1	28668146	28669763	1618	*
1	28721857	28722285	429	*
1	28736298	28738084	1787	*
1	28784892	28785861	970	*
1	28828439	28828796	358	*
1	28846182	28846586	405	*
1	28859825	28861205	1381	*
1	28865802	28866360	559	*
1	28877050	28877590	541	*
1	28882060	28882512	453	*
1	28884750	28885356	607	*
1	28886786	28888505	1720	*
1	28914032	28915525	1494	*
1	28971975	28972854	880	*
1	29122010	29123330	1321	*
1	29124169	29125064	896	*
1	29133629	29134559	931	*
1	29181073	29182356	1284	*
1	29197359	29197883	525	*
1	29202666	29203419	754	*
1	29230549	29231347	799	*
1	29236129	29236839	711	*
1	29239180	29239596	417	*
1	29245705	29246307	603	*
1	29257072	29257934	863	*
1	29271464	29272251	788	*
1	29282974	29283747	774	*
1	29332243	29332711	469	*
1	29453483	29453915	433	*
1	29513336	29513726	391	*
1	29569856	29570744	889	*
1	29584683	29585374	692	*
1	29640023	29640658	636	*
1	29649382	29650288	907	*
1	29697981	29698533	553	*
1	29703582	29703879	298	*
1	29706991	29707306	316	*
1	29708909	29710165	1257	*
1	29793043	29793528	486	*
1	29974236	29974772	537	*
1	30058941	30059340	400	*
1	30083677	30084498	822	*
1	30106182	30106466	285	*
1	30111505	30111973	469	*
1	30191078	30191774	697	*
1	30525801	30526577	777	*
1	30618368	30618867	500	*
1	30657543	30658202	660	*
1	30670289	30671084	796	*
1	30707949	30708439	491	*
1	30717916	30719687	1772	*
1	30778331	30778765	435	*
1	30779588	30779937	350	*
1	30782349	30782700	352	*
1	30801560	30802244	685	*
1	30807184	30807866	683	*
1	30816303	30817186	884	*
1	30823682	30824911	1230	*
1	30854173	30854469	297	*
1	30909891	30910376	486	*
1	30911216	30911856	641	*
1	30929257	30930116	860	*
1	30966699	30967278	580	*
1	30977026	30977517	492	*
1	31065039	31066234	1196	*
1	31111200	31111744	545	*
1	31135738	31136661	924	*
1	31154598	31155891	1294	*
1	31162531	31163041	511	*
1	31170590	31171410	821	*
1	31181468	31182771	1304	*
1	31238982	31240202	1221	*
1	31296342	31297996	1655	*
1	31372910	31374089	1180	*
1	31394520	31395229	710	*
1	31412999	31414167	1169	*
1	31422419	31423059	641	*
1	31482616	31483963	1348	*
1	31497531	31498000	470	*
1	31520758	31521378	621	*
1	31523748	31524116	369	*
1	31530873	31531838	966	*
1	31548656	31550138	1483	*
1	31551192	31551682	491	*
1	31573795	31574566	772	*
1	31575486	31576696	1211	*
1	31583941	31584507	567	*
1	31587823	31589243	1421	*
1	31591585	31592258	674	*
1	31593933	31594488	556	*
1	31644287	31645480	1194	*
1	31666230	31666935	706	*
1	31669614	31670611	998	*
1	31689633	31690310	678	*
1	31700763	31701985	1223	*
1	31712488	31713127	640	*
1	31714575	31715883	1309	*
1	31736554	31737140	587	*
1	31745419	31746724	1306	*
1	31753717	31754373	657	*
1	31755315	31755728	414	*
1	31762555	31763314	760	*
1	31769501	31770434	934	*
1	31788126	31789773	1648	*
1	31798066	31799409	1344	*
1	31815700	31816273	574	*
1	31897255	31898279	1025	*
1	31937366	31938925	1560	*
1	31939575	31940218	644	*
1	31944194	31945106	913	*
1	31954419	31955269	851	*
1	31955992	31956529	538	*
1	31963903	31964670	768	*
1	31977725	31978138	414	*
1	32003472	32003862	391	*
1	32013173	32014979	1807	*
1	32062276	32063218	943	*
1	32066357	32066847	491	*
1	32072360	32073656	1297	*
1	32100999	32101810	812	*
1	32107797	32108946	1150	*
1	32133148	32133915	768	*
1	32179241	32180880	1640	*
1	32200200	32201288	1089	*
1	32205295	32206408	1114	*
1	32208891	32209226	336	*
1	32215466	32216169	704	*
1	32221798	32222948	1151	*
1	32235810	32236554	745	*
1	32240219	32241789	1571	*
1	32246786	32247558	773	*
1	32248172	32248782	611	*
1	32291626	32292892	1267	*
1	32335121	32336606	1486	*
1	32351081	32352395	1315	*
1	32393890	32395235	1346	*
1	32400817	32401520	704	*
1	32413781	32414350	570	*
1	32448334	32449006	673	*
1	32485484	32486029	546	*
1	32500063	32501194	1132	*
1	32520468	32521133	666	*
1	32539006	32540455	1450	*
1	32611938	32612750	813	*
1	32650202	32651833	1632	*
1	32701511	32704282	2772	*
1	32712157	32712702	546	*
1	32716486	32717205	720	*
1	32724568	32725816	1249	*
1	32741117	32741923	807	*
1	32742079	32743733	1655	*
1	32759287	32760654	1368	*
1	32760908	32761944	1037	*
1	32769502	32770019	518	*
1	32772921	32773454	534	*
1	32775130	32775997	868	*
1	32789285	32789838	554	*
1	32791931	32792206	276	*
1	32795457	32796174	718	*
1	32816674	32818614	1941	*
1	32876659	32877005	347	*
1	32878238	32878747	510	*
1	32886364	32886880	517	*
1	32892783	32893793	1011	*
1	32901107	32901858	752	*
1	32933436	32934581	1146	*
1	32948816	32949233	418	*
1	32963611	32965151	1541	*
1	32981091	32981705	615	*
1	32988775	32989607	833	*
1	32992353	32993049	697	*
1	33007162	33007922	761	*
1	33036055	33037257	1203	*
1	33050158	33050876	719	*
1	33055146	33055959	814	*
1	33060416	33061429	1014	*
1	33072591	33073094	504	*
1	33080793	33081622	830	*
1	33086318	33086897	580	*
1	33099071	33099976	906	*
1	33119891	33120207	317	*
1	33126907	33127657	751	*
1	33152832	33153532	701	*
1	33163444	33164078	635	*
1	33180610	33182322	1713	*
1	33218721	33219013	293	*
1	33220887	33221523	637	*
1	33255403	33256248	846	*
1	33295315	33295848	534	*
1	33298466	33299183	718	*
1	33306466	33307584	1119	*
1	33327685	33328303	619	*
1	33349119	33350683	1565	*
1	33367588	33368283	696	*
1	33430316	33431482	1167	*
1	33433569	33434105	537	*
1	33442957	33444181	1225	*
1	33455685	33456195	511	*
1	33458589	33458988	400	*
1	33470516	33470860	345	*
1	33472097	33472996	900	*
1	33612813	33613231	419	*
1	33633112	33633633	522	*
1	33634845	33635202	358	*
1	33985567	33986030	464	*
1	34597795	34598240	446	*
1	34626312	34626941	630	*
1	34681511	34681832	322	*
1	34742631	34743140	510	*
1	34754940	34755643	704	*
1	34762676	34764084	1409	*
1	34781008	34782057	1050	*
1	34783562	34783954	393	*
1	34786468	34786886	419	*
1	34852637	34853311	675	*
1	34858824	34860238	1415	*
1	34865770	34866899	1130	*
1	34885523	34886075	553	*
1	34983987	34985750	1764	*
1	35031053	35032287	1235	*
1	35047191	35047913	723	*
1	35062831	35063202	372	*
1	35079015	35080034	1020	*
1	35191874	35193818	1945	*
1	35202109	35202502	394	*
1	35221016	35221340	325	*
1	35268281	35269532	1252	*
1	35450927	35451386	460	*
1	35505795	35506736	942	*
1	35556804	35557987	1184	*
1	35564502	35565004	503	*
1	35568944	35569258	315	*
1	35573053	35573867	815	*
1	35641152	35642241	1090	*
1	35707306	35708470	1165	*
1	35717759	35719355	1597	*
1	35726798	35727431	634	*
1	35769165	35770411	1247	*
1	35807424	35809244	1821	*
1	35882878	35884240	1363	*
1	35930202	35931987	1786	*
1	36088439	36089911	1473	*
1	36096828	36097391	564	*
1	36099429	36100345	917	*
1	36109051	36109411	361	*
1	36133406	36134096	691	*
1	36149015	36150054	1040	*
1	36150520	36151256	737	*
1	36155513	36157425	1913	*
1	36160836	36161475	640	*
1	36187770	36188680	911	*
1	36203384	36204545	1162	*
1	36217669	36217974	306	*
1	36223447	36225166	1720	*
1	36248295	36249072	778	*
1	36266373	36266763	391	*
1	36285452	36285785	334	*
1	36299820	36300427	608	*
1	36305983	36307513	1531	*
1	36323013	36324014	1002	*
1	36342550	36343286	737	*
1	36350690	36351972	1283	*
1	36373779	36375171	1393	*
1	36384959	36387124	2166	*
1	36397125	36398196	1072	*
1	36420770	36421449	680	*
1	36450038	36450989	952	*
1	36463464	36464905	1442	*
1	36553709	36554311	603	*
1	36575914	36576532	619	*
1	36609242	36609579	338	*
1	36650323	36650805	483	*
1	36703675	36704135	461	*
1	37177282	37177593	312	*
1	37434184	37434880	697	*
1	37454685	37455553	869	*
1	37471376	37472252	877	*
1	37474276	37474760	485	*
1	37476481	37477136	656	*
1	37479667	37480178	512	*
1	37486926	37487700	775	*
1	37499071	37499629	559	*
1	37513883	37515331	1449	*
1	37534417	37534918	502	*
1	37553790	37554627	838	*
1	37595368	37596440	1073	*
1	37603126	37603583	458	*
1	37690009	37691041	1033	*
1	37691513	37692942	1430	*
1	37752653	37753523	871	*
1	37793415	37794646	1232	*
1	37807334	37809332	1999	*
1	37859058	37860599	1542	*
1	37865370	37866006	637	*
1	37931125	37932251	1127	*
1	37946124	37947280	1157	*
1	37989159	37990508	1350	*
1	37995745	37996849	1105	*
1	38000369	38001025	657	*
1	38005145	38005947	803	*
1	38012165	38013360	1196	*
1	38029843	38030520	678	*
1	38046685	38047768	1084	*
1	38064109	38064776	668	*
1	38123360	38123773	414	*
1	38138348	38139391	1044	*
1	38221031	38221628	598	*
1	38588946	38589431	486	*
1	38786260	38786967	708	*
1	38817960	38818562	603	*
1	38835237	38835615	379	*
1	38858808	38860465	1658	*
1	38872676	38873987	1312	*
1	38941243	38942233	991	*
1	38964174	38964493	320	*
1	38973132	38973492	361	*
1	38990709	38992451	1743	*
1	39025861	39027219	1359	*
1	39081052	39082097	1046	*
1	39098354	39099122	769	*
1	39104949	39106672	1724	*
1	39130277	39130726	450	*
1	39178394	39179396	1003	*
1	39183566	39184322	757	*
1	39191621	39192788	1168	*
1	39204456	39205402	947	*
1	39258616	39259209	594	*
1	39378309	39378605	297	*
1	39387440	39387804	365	*
1	39392007	39392399	393	*
1	39395438	39395877	440	*
1	39398293	39399122	830	*
1	39408290	39409765	1476	*
1	39490955	39491969	1015	*
1	39514615	39515120	506	*
1	39539010	39539569	560	*
1	39559128	39559978	851	*
1	39575332	39576267	936	*
1	39576687	39577174	488	*
1	39605970	39606785	816	*
1	39609573	39610112	540	*
1	39632712	39633469	758	*
1	39639393	39640152	760	*
1	39653513	39653900	388	*
1	39691094	39691843	750	*
1	39701640	39702231	592	*
1	39738589	39739456	868	*
1	39788373	39789720	1348	*
1	39799019	39800252	1234	*
1	39816445	39817173	729	*
1	39845482	39846293	812	*
1	39852163	39852831	669	*
1	39882772	39883832	1061	*
1	39892518	39893609	1092	*
1	39900819	39902562	1744	*
1	39919314	39919871	558	*
1	39934312	39934928	617	*
1	39954816	39956289	1474	*
1	39960387	39960856	470	*
1	39981905	39982333	429	*
1	40015154	40015522	369	*
1	40032335	40032655	321	*
1	40039299	40041265	1967	*
1	40078461	40079017	557	*
1	40084757	40085258	502	*
1	40096720	40097850	1131	*
1	40130962	40131410	449	*
1	40143838	40144497	660	*
1	40161017	40162096	1080	*
1	40257362	40258732	1371	*
1	40267664	40268264	601	*
1	40315271	40317104	1834	*
1	40338536	40339099	564	*
1	40373385	40374989	1605	*
1	40438415	40438829	415	*
1	40449732	40451205	1474	*
1	40476916	40478047	1132	*
1	40508318	40509465	1148	*
1	40531177	40532231	1055	*
1	40583322	40583798	477	*
1	40612296	40612945	650	*
1	40665272	40666132	861	*
1	40668812	40669130	319	*
1	40691369	40692814	1446	*
1	40703307	40703729	423	*
1	40711336	40711968	633	*
1	40774096	40774527	432	*
1	40783326	40783924	599	*
1	40802144	40802819	676	*
1	40848530	40849017	488	*
1	40849839	40850364	526	*
1	40861338	40862945	1608	*
1	40875659	40876159	501	*
1	40877638	40878257	620	*
1	40897419	40897903	485	*
1	40898369	40899029	661	*
1	40901844	40902325	482	*
1	40944305	40944760	456	*
1	40952314	40953005	692	*
1	40967367	40968544	1178	*
1	40979280	40981034	1755	*
1	41003359	41004207	849	*
1	41102070	41102941	872	*
1	41109296	41110363	1068	*
1	41123051	41123626	576	*
1	41152332	41153281	950	*
1	41241238	41242799	1562	*
1	41268143	41268734	592	*
1	41282653	41283206	554	*
1	41317327	41317805	479	*
1	41322883	41323269	387	*
1	41325784	41326199	416	*
1	41341951	41342543	593	*
1	41360859	41362223	1365	*
1	41365810	41366740	931	*
1	41371728	41372625	898	*
1	41381106	41383107	2002	*
1	41387687	41388180	494	*
1	41404246	41404859	614	*
1	41414808	41415793	986	*
1	41418830	41419442	613	*
1	41423441	41424457	1017	*
1	41432323	41433575	1253	*
1	41442486	41443271	786	*
1	41448315	41448808	494	*
1	41455625	41456343	719	*
1	41474461	41475343	883	*
1	41476693	41477457	765	*
1	41482315	41483541	1227	*
1	41484222	41485176	955	*
1	41485669	41486006	338	*
1	41493028	41493686	659	*
1	41496120	41496687	568	*
1	41498557	41499244	688	*
1	41501520	41502155	636	*
1	41514345	41514760	416	*
1	41514875	41515657	783	*
1	41515863	41516618	756	*
1	41537758	41538341	584	*
1	41573867	41574609	743	*
1	41626055	41627461	1407	*
1	41649878	41650481	604	*
1	41661408	41663241	1834	*
1	41672068	41672817	750	*
1	41712613	41713144	532	*
1	41713639	41714330	692	*
1	41773032	41773506	475	*
1	41782890	41783712	823	*
1	41812031	41812975	945	*
1	41823339	41823907	569	*
1	41862211	41863451	1241	*
1	41870017	41870591	575	*
1	41900475	41901237	763	*
1	41901849	41902648	800	*
1	41917912	41918371	460	*
1	41920687	41921051	365	*
1	41954411	41955035	625	*
1	41955423	41956175	753	*
1	42003427	42003843	417	*
1	42035141	42036386	1246	*
1	42146714	42147285	572	*
1	42165343	42166393	1051	*
1	42177000	42177257	258	*
1	42214413	42215087	675	*
1	42334273	42335992	1720	*
1	42380236	42381223	988	*
1	42420859	42421432	574	*
1	42439881	42440334	454	*
1	42455802	42457238	1437	*
1	42462786	42463736	951	*
1	42657936	42659209	1274	*
1	42681700	42683325	1626	*
1	42756849	42757316	468	*
1	42765835	42767796	1962	*
1	42777908	42778237	330	*
1	42816353	42817730	1378	*
1	42846069	42847437	1369	*
1	42922983	42923366	384	*
1	42923879	42925239	1361	*
1	42936216	42937575	1360	*
1	42940991	42941450	460	*
1	42941720	42942225	506	*
1	42943152	42943699	548	*
1	42957732	42959429	1698	*
1	42962622	42963024	403	*
1	42966944	42967637	694	*
1	43008173	43009048	876	*
1	43048677	43049444	768	*
1	43073480	43074050	571	*
1	43147497	43148123	627	*
1	43171610	43172968	1359	*
1	43206579	43207834	1256	*
1	43227095	43227630	536	*
1	43238134	43238433	300	*
1	43256591	43257150	560	*
1	43293583	43294975	1393	*
1	43348462	43349951	1490	*
1	43358097	43359578	1482	*
1	43366784	43368635	1852	*
1	43373034	43373920	887	*
1	43389391	43390275	885	*
1	43414644	43415196	553	*
1	43452788	43454208	1421	*
1	43454432	43454948	517	*
1	43472442	43473179	738	*
1	43475972	43476451	480	*
1	43523065	43523528	464	*
1	43530530	43532142	1613	*
1	43582098	43582817	720	*
1	43649504	43650849	1346	*
1	43706619	43708205	1587	*
1	43763338	43764056	719	*
1	43774396	43774840	445	*
1	43776477	43776803	327	*
1	43783201	43784243	1043	*
1	43821913	43822687	775	*
1	43834888	43835670	783	*
1	43836373	43836951	579	*
1	43853107	43853995	889	*
1	43858120	43859003	884	*
1	43872308	43872665	358	*
1	43879139	43880120	982	*
1	43884983	43885956	974	*
1	43933158	43935137	1980	*
1	43945972	43948018	2047	*
1	43969622	43970358	737	*
1	43974232	43975677	1446	*
1	43979514	43980314	801	*
1	43990965	43992235	1271	*
1	44005530	44006249	720	*
1	44029649	44031792	2144	*
1	44035971	44037143	1173	*
1	44047724	44048560	837	*
1	44048814	44049238	425	*
1	44049605	44050427	823	*
1	44089498	44090154	657	*
1	44101193	44101944	752	*
1	44154651	44155549	899	*
1	44213181	44213996	816	*
1	44217752	44218259	508	*
1	44293686	44294341	656	*
1	44325900	44326716	817	*
1	44327589	44328583	995	*
1	44354745	44355840	1096	*
1	44378007	44378600	594	*
1	44389858	44390869	1012	*
1	44404976	44406975	2000	*
1	44423431	44424361	931	*
1	44485089	44486397	1309	*
1	44531827	44532591	765	*
1	44553757	44554220	464	*
1	44568155	44568500	346	*
1	44584096	44584666	571	*
1	44594960	44595644	685	*
1	44631410	44632925	1516	*
1	44652620	44653257	638	*
1	44655410	44655871	462	*
1	44673721	44675035	1315	*
1	44707086	44707582	497	*
1	44713056	44713559	504	*
1	44714940	44715362	423	*
1	44721065	44722359	1295	*
1	44730474	44731533	1060	*
1	44738073	44738925	853	*
1	44739340	44740436	1097	*
1	44775082	44776884	1803	*
1	44786110	44786941	832	*
1	44793439	44794104	666	*
1	44799676	44801061	1386	*
1	44806944	44808767	1824	*
1	44819232	44820788	1557	*
1	44835762	44836358	597	*
1	44842684	44843702	1019	*
1	44924798	44925434	637	*
1	44947041	44947892	852	*
1	44968009	44968731	723	*
1	44970307	44970731	425	*
1	44985711	44986941	1231	*
1	45010505	45013069	2565	*
1	45018526	45019213	688	*
1	45037456	45037840	385	*
1	45172005	45172357	353	*
1	45179662	45180555	894	*
1	45205394	45207057	1664	*
1	45246658	45247192	535	*
1	45265994	45266804	811	*
1	45303272	45304470	1199	*
1	45326563	45328364	1802	*
1	45329396	45329847	452	*
1	45339517	45341255	1739	*
1	45356195	45356605	411	*
1	45393615	45394456	842	*
1	45410775	45411922	1148	*
1	45490430	45491698	1269	*
1	45499533	45500724	1192	*
1	45512619	45512932	314	*
1	45521199	45522659	1461	*
1	45522707	45523100	394	*
1	45550394	45551616	1223	*
1	45569828	45570609	782	*
1	45583250	45585171	1922	*
1	45590269	45590593	325	*
1	45686080	45687644	1565	*
1	45750079	45751143	1065	*
1	45802710	45804466	1757	*
1	45881616	45882007	392	*
1	45892131	45892857	727	*
1	45954086	45954887	802	*
1	46036897	46037548	652	*
1	46103053	46103536	484	*
1	46132213	46133647	1435	*
1	46134800	46135349	550	*
1	46171141	46172142	1002	*
1	46174427	46175216	790	*
1	46179538	46179792	255	*
1	46183030	46183873	844	*
1	46197880	46198927	1048	*
1	46223320	46224055	736	*
1	46246872	46248658	1787	*
1	46301435	46303446	2012	*
1	46303506	46303971	466	*
1	46333479	46333865	387	*
1	46339605	46341388	1784	*
1	46347912	46348503	592	*
1	46401967	46402596	630	*
1	46406128	46407041	914	*
1	46442305	46443226	922	*
1	46446866	46447178	313	*
1	46466398	46467108	711	*
1	46477435	46477772	338	*
1	46489247	46490237	991	*
1	46508735	46509057	323	*
1	46516656	46517565	910	*
1	46520078	46521015	938	*
1	46522158	46522935	778	*
1	46527879	46528372	494	*
1	46532920	46533733	814	*
1	46547852	46548417	566	*
1	46603541	46604598	1058	*
1	46611680	46612194	515	*
1	46616139	46617322	1184	*
1	46622293	46622814	522	*
1	46643180	46643853	674	*
1	46667541	46668775	1235	*
1	46718594	46719662	1069	*
1	46725024	46725589	566	*
1	46747731	46748042	312	*
1	47013053	47013951	899	*
1	47030419	47031614	1196	*
1	47069022	47069780	759	*
1	47179069	47179792	724	*
1	47189899	47190705	807	*
1	47253855	47254372	518	*
1	47313421	47314615	1195	*
1	47333293	47334931	1639	*
1	47388582	47389201	620	*
1	47424381	47424967	587	*
1	47436430	47438357	1928	*
1	47449880	47450448	569	*
1	47477772	47478624	853	*
1	47487804	47488376	573	*
1	47507885	47508892	1008	*
1	47520977	47521965	989	*
1	47527562	47528010	449	*
1	47534092	47534835	744	*
1	47569713	47570240	528	*
1	47650211	47650725	515	*
1	47684670	47685556	887	*
1	47709361	47710276	916	*
1	47710347	47711013	667	*
1	47725945	47726611	667	*
1	47738583	47739093	511	*
1	47758220	47759456	1237	*
1	47763561	47764240	680	*
1	47809114	47809848	735	*
1	47871620	47872472	853	*
1	47894586	47895346	761	*
1	47905817	47906927	1111	*
1	47914151	47914914	764	*
1	47926348	47926976	629	*
1	47934074	47935210	1137	*
1	47941685	47942580	896	*
1	47991187	47991491	305	*
1	47992672	47993203	532	*
1	47996407	47997978	1572	*
1	48006999	48007614	616	*
1	48017628	48018152	525	*
1	48019634	48020364	731	*
1	48026215	48026688	474	*
1	48052194	48053002	809	*
1	48069412	48070866	1455	*
1	48077668	48078335	668	*
1	48082255	48082948	694	*
1	48093670	48094463	794	*
1	48105070	48105514	445	*
1	48109444	48109918	475	*
1	48114680	48115429	750	*
1	48186296	48186910	615	*
1	48201970	48202587	618	*
1	48369090	48370030	941	*
1	48471668	48472711	1044	*
1	48494251	48494880	630	*
1	48498136	48498420	285	*
1	48530739	48531119	381	*
1	48572665	48573164	500	*
1	48677370	48677681	312	*
1	48741382	48741905	524	*
1	48807576	48808241	666	*
1	48817568	48817887	320	*
1	48852861	48853557	697	*
1	48859330	48859793	464	*
1	48878208	48879039	832	*
1	48916122	48916784	663	*
1	48917836	48918216	381	*
1	48931330	48932304	975	*
1	49257177	49257992	816	*
1	49351772	49352236	465	*
1	49364696	49365041	346	*
1	50332847	50333878	1032	*
1	50348561	50349251	691	*
1	50368285	50368953	669	*
1	50423169	50424314	1146	*
1	50603577	50604035	459	*
1	50873375	50874035	661	*
1	50959273	50960823	1551	*
1	50968034	50970370	2337	*
1	50976457	50978586	2130	*
1	50984970	50985630	661	*
1	51063125	51063619	495	*
1	51070584	51070984	401	*
1	51071966	51072532	567	*
1	51235787	51237346	1560	*
1	51261208	51261842	635	*
1	51264444	51264872	429	*
1	51296499	51297381	883	*
1	51313909	51314698	790	*
1	51331206	51331830	625	*
1	51344542	51345332	791	*
1	51517953	51519647	1695	*
1	51541277	51541891	615	*
1	51558093	51559045	953	*
1	51567649	51568204	556	*
1	51569407	51570330	924	*
1	51575410	51576029	620	*
1	51616848	51617977	1130	*
1	51622437	51622900	464	*
1	51637008	51637501	494	*
1	51642453	51643199	747	*
1	51648226	51648852	627	*
1	51660681	51661656	976	*
1	51671562	51672380	819	*
1	51699227	51699848	622	*
1	51729138	51730316	1179	*
1	51736715	51737136	422	*
1	51877970	51879374	1405	*
1	51897291	51898020	730	*
1	51898111	51898716	606	*
1	51990279	51991117	839	*
1	52002120	52002651	532	*
1	52032385	52033986	1602	*
1	52054850	52055845	996	*
1	52056010	52056989	980	*
1	52127314	52127926	613	*
1	52141702	52143052	1351	*
1	52159285	52159761	477	*
1	52176533	52177288	756	*
1	52296309	52296640	332	*
1	52365107	52366660	1554	*
1	52368408	52368768	361	*
1	52403605	52405088	1484	*
1	52552186	52553957	1772	*
1	52574456	52575272	817	*
1	52632634	52633718	1085	*
1	52662497	52663246	750	*
1	52686250	52686753	504	*
1	52697602	52698835	1234	*
1	52702913	52703747	835	*
1	52708266	52708874	609	*
1	52726065	52727457	1393	*
1	52833414	52834075	662	*
1	52842427	52844236	1810	*
1	52921097	52922153	1057	*
1	52926926	52928299	1374	*
1	53014725	53015803	1079	*
1	53047659	53048370	712	*
1	53135199	53136169	971	*
1	53145711	53146798	1088	*
1	53172682	53173228	547	*
1	53185518	53186043	526	*
1	53196287	53197660	1374	*
1	53220062	53221068	1007	*
1	53238150	53239123	974	*
1	53292963	53293546	584	*
1	53325727	53327846	2120	*
1	53328030	53328510	481	*
1	53381748	53382384	637	*
1	53393333	53393745	413	*
1	53413012	53414112	1101	*
1	53444609	53445094	486	*
1	53448657	53449537	881	*
1	53470069	53470569	501	*
1	53477634	53478127	494	*
1	53485289	53486033	745	*
1	53509308	53509660	353	*
1	53511783	53513025	1243	*
1	53541795	53542935	1141	*
1	53572230	53573169	940	*
1	53582145	53582774	630	*
1	53625819	53626516	698	*
[truncated: 60,667 more rows]

## Sheet: Reox
seqnames	start	end	width	strand
1	778308	779336	1029	*
1	827102	827873	772	*
1	869577	870267	691	*
1	906728	907215	488	*
1	910552	911695	1144	*
1	925546	925986	441	*
1	938138	938864	727	*
1	941616	942291	676	*
1	943131	943496	366	*
1	959109	959816	708	*
1	960376	961353	978	*
1	965943	967410	1468	*
1	975879	976674	796	*
1	999805	1000945	1141	*
1	1001583	1002154	572	*
1	1005220	1005589	370	*
1	1013179	1014621	1443	*
1	1019268	1020404	1137	*
1	1021092	1021757	666	*
1	1024389	1025484	1096	*
1	1058717	1059938	1222	*
1	1063814	1064560	747	*
1	1073789	1074722	934	*
1	1079376	1080599	1224	*
1	1115764	1116880	1117	*
1	1121742	1122483	742	*
1	1133392	1133717	326	*
1	1157376	1158669	1294	*
1	1207997	1208712	716	*
1	1231135	1232420	1286	*
1	1244046	1244691	646	*
1	1258468	1259015	548	*
1	1264757	1265576	820	*
1	1273304	1274777	1474	*
1	1281459	1282475	1017	*
1	1290954	1292202	1249	*
1	1304771	1305959	1189	*
1	1307886	1308773	888	*
1	1318245	1318638	394	*
1	1324305	1325768	1464	*
1	1330662	1331641	980	*
1	1344646	1346381	1736	*
1	1347675	1348355	681	*
1	1353358	1354107	750	*
1	1360092	1360944	853	*
1	1374542	1375728	1187	*
1	1399024	1400578	1555	*
1	1406736	1408002	1267	*
1	1431782	1432225	444	*
1	1440742	1441831	1090	*
1	1471330	1472091	762	*
1	1504743	1505813	1071	*
1	1511398	1512507	1110	*
1	1554538	1555377	840	*
1	1574149	1575514	1366	*
1	1615111	1616673	1563	*
1	1627251	1629021	1771	*
1	1658674	1659564	891	*
1	1686187	1687043	857	*
1	1692291	1693367	1077	*
1	1723965	1724850	886	*
1	1740951	1741459	509	*
1	1758667	1759712	1046	*
1	1777633	1779234	1602	*
1	1782711	1783292	582	*
1	1858986	1859699	714	*
1	1889915	1892064	2150	*
1	1894493	1894924	432	*
1	1906252	1906575	324	*
1	1906670	1907861	1192	*
1	1908437	1909480	1044	*
1	1918934	1920009	1076	*
1	1942811	1943211	401	*
1	1943799	1944509	711	*
1	1959692	1960521	830	*
1	1968944	1969922	979	*
1	2003484	2004107	624	*
1	2015061	2015601	541	*
1	2042898	2043583	686	*
1	2049496	2050874	1379	*
1	2104315	2105543	1229	*
1	2132925	2133960	1036	*
1	2139861	2140438	578	*
1	2174153	2174810	658	*
1	2189324	2190645	1322	*
1	2194614	2195715	1102	*
1	2199072	2199731	660	*
1	2205178	2205503	326	*
1	2207175	2208874	1700	*
1	2212468	2213438	971	*
1	2227351	2228087	737	*
1	2231633	2232161	529	*
1	2234272	2234765	494	*
1	2314402	2314770	369	*
1	2360599	2361427	829	*
1	2372777	2373231	455	*
1	2381497	2382340	844	*
1	2382612	2382914	303	*
1	2391013	2392293	1281	*
1	2411974	2413584	1611	*
1	2801528	2802262	735	*
1	2821807	2822457	651	*
1	2922065	2922398	334	*
1	3066211	3066725	515	*
1	3312915	3313706	792	*
1	3319893	3320424	532	*
1	3410191	3410662	472	*
1	3419431	3419812	382	*
1	3424690	3425055	366	*
1	3431271	3431607	337	*
1	3452963	3453655	693	*
1	3453847	3455153	1307	*
1	3471194	3472120	927	*
1	3481795	3482855	1061	*
1	3491219	3492210	992	*
1	3502979	3503374	396	*
1	3503839	3505115	1277	*
1	3509884	3511023	1140	*
1	3515851	3516951	1101	*
1	3530070	3530696	627	*
1	3530789	3531800	1012	*
1	3542749	3543930	1182	*
1	3547212	3548010	799	*
1	3548028	3548786	759	*
1	3553441	3553739	299	*
1	3554837	3555694	858	*
1	3610929	3611925	997	*
1	3618763	3619383	621	*
1	3624168	3625867	1700	*
1	3649723	3650306	584	*
1	3652063	3653153	1091	*
1	3668648	3669353	706	*
1	3703104	3703764	661	*
1	3746790	3747631	842	*
1	3772082	3773325	1244	*
1	3775474	3776311	838	*
1	3795716	3797035	1320	*
1	3810938	3811684	747	*
1	3856591	3858094	1504	*
1	3869717	3870282	566	*
1	3899733	3901631	1899	*
1	3910640	3911385	746	*
1	4652597	4653085	489	*
1	5424815	5425275	461	*
1	5509718	5510218	501	*
1	5514586	5514895	310	*
1	5745813	5746341	529	*
1	5927903	5928405	503	*
1	5991561	5993535	1975	*
1	6001972	6002572	601	*
1	6025150	6026805	1656	*
1	6108856	6109525	670	*
1	6111637	6112050	414	*
1	6127520	6128305	786	*
1	6148368	6148979	612	*
1	6157199	6158257	1059	*
1	6198920	6199885	966	*
1	6205002	6206947	1946	*
1	6235266	6236377	1112	*
1	6245029	6246176	1148	*
1	6259639	6260822	1184	*
1	6261009	6261566	558	*
1	6300149	6301089	941	*
1	6331335	6332069	735	*
1	6343321	6344119	799	*
1	6353819	6354566	748	*
1	6363057	6363548	492	*
1	6392680	6394238	1559	*
1	6414187	6414819	633	*
1	6419560	6420396	837	*
1	6422844	6423146	303	*
1	6427352	6428293	942	*
1	6437017	6437559	543	*
1	6438035	6438546	512	*
1	6440306	6440896	591	*
1	6448203	6449473	1271	*
1	6464414	6464927	514	*
1	6475328	6476059	732	*
1	6488971	6489477	507	*
1	6489899	6491875	1977	*
1	6497313	6497875	563	*
1	6501897	6502637	741	*
1	6523587	6523974	388	*
1	6553725	6554835	1111	*
1	6578195	6578538	344	*
1	6579498	6581130	1633	*
1	6600886	6603724	2839	*
1	6612719	6614548	1830	*
1	6624652	6626062	1411	*
1	6634642	6635074	433	*
1	6701088	6702293	1206	*
1	6719976	6720349	374	*
1	6724562	6725165	604	*
1	6743587	6744182	596	*
1	6770578	6771107	530	*
1	6784214	6785568	1355	*
1	6795464	6796502	1039	*
1	6859940	6860870	931	*
1	6889911	6890406	496	*
1	6935072	6935627	556	*
1	6960297	6960929	633	*
1	6962370	6963917	1548	*
1	6991273	6991851	579	*
1	6998220	6998702	483	*
1	7070151	7070922	772	*
1	7117378	7118454	1077	*
1	7121535	7122161	627	*
1	7127427	7128381	955	*
1	7136151	7137070	920	*
1	7207921	7208275	355	*
1	7223424	7224310	887	*
1	7265696	7266859	1164	*
1	7298800	7300043	1244	*
1	7300866	7301825	960	*
1	7317919	7318334	416	*
1	7334465	7335947	1483	*
1	7341100	7342095	996	*
1	7379376	7379824	449	*
1	7380651	7381075	425	*
1	7388640	7390417	1778	*
1	7401735	7402629	895	*
1	7424328	7425299	972	*
1	7469068	7469950	883	*
1	7470703	7472151	1449	*
1	7477115	7477621	507	*
1	7478921	7479308	388	*
1	7482796	7483195	400	*
1	7485205	7485774	570	*
1	7526315	7527186	872	*
1	7533941	7534698	758	*
1	7539553	7540130	578	*
1	7549207	7550526	1320	*
1	7561242	7561773	532	*
1	7574130	7574857	728	*
1	7645324	7645924	601	*
1	7647056	7647619	564	*
1	7667413	7668111	699	*
1	7669463	7669979	517	*
1	7680093	7680720	628	*
1	7704432	7704995	564	*
1	7752492	7753151	660	*
1	7770877	7772108	1232	*
1	7783185	7784625	1441	*
1	7810343	7810789	447	*
1	7869198	7869997	800	*
1	7893654	7894905	1252	*
1	7902602	7903109	508	*
1	7953801	7954634	834	*
1	7961062	7962207	1146	*
1	7975072	7975655	584	*
1	7982150	7982710	561	*
1	8004383	8005671	1289	*
1	8015024	8015366	343	*
1	8017510	8017913	404	*
1	8025724	8026922	1199	*
1	8027983	8028620	638	*
1	8040416	8041031	616	*
1	8045933	8046743	811	*
1	8047636	8048489	854	*
1	8055882	8056394	513	*
1	8061200	8062392	1193	*
1	8077132	8077603	472	*
1	8078137	8078675	539	*
1	8091487	8092161	675	*
1	8094481	8094863	383	*
1	8097234	8097854	621	*
1	8116511	8117265	755	*
1	8121026	8121908	883	*
1	8133144	8134407	1264	*
1	8137646	8138223	578	*
1	8154668	8155048	381	*
1	8174169	8174717	549	*
1	8174833	8175216	384	*
1	8182032	8182971	940	*
1	8189777	8190259	483	*
1	8197517	8198369	853	*
1	8201309	8201814	506	*
1	8202136	8202864	729	*
1	8204242	8204808	567	*
1	8211711	8212536	826	*
1	8259015	8260183	1169	*
1	8314316	8314840	525	*
1	8317934	8318383	450	*
1	8343107	8344199	1093	*
1	8348812	8349330	519	*
1	8396901	8397368	468	*
1	8412179	8412785	607	*
1	8423219	8424717	1499	*
1	8438978	8439843	866	*
1	8525417	8526309	893	*
1	8625982	8627105	1124	*
1	8661339	8662151	813	*
1	8701017	8701800	784	*
1	8702962	8703808	847	*
1	8712212	8713263	1052	*
1	8733428	8734028	601	*
1	8797057	8797563	507	*
1	8816873	8818289	1417	*
1	8822606	8823127	522	*
1	8848702	8849434	733	*
1	8857961	8858663	703	*
1	8873555	8873971	417	*
1	8877933	8879539	1607	*
1	8880125	8880461	337	*
1	8889223	8890975	1753	*
1	8903583	8904569	987	*
1	8917921	8918469	549	*
1	8939480	8940046	567	*
1	8962897	8963454	558	*
1	8973989	8974514	526	*
1	8986018	8986718	701	*
1	9004931	9005485	555	*
1	9078631	9079453	823	*
1	9080565	9081292	728	*
1	9084681	9085577	897	*
1	9085976	9086456	481	*
1	9101546	9101924	379	*
1	9110457	9111341	885	*
1	9127892	9129924	2033	*
1	9145033	9145586	554	*
1	9162859	9164494	1636	*
1	9181059	9183124	2066	*
1	9234216	9235478	1263	*
1	9266951	9267505	555	*
1	9270376	9271005	630	*
1	9275499	9276069	571	*
1	9280373	9280962	590	*
1	9290062	9290822	761	*
1	9291941	9293339	1399	*
1	9299927	9300694	768	*
1	9302745	9303509	765	*
1	9315481	9316469	989	*
1	9317625	9318237	613	*
1	9321260	9321999	740	*
1	9350078	9351022	945	*
1	9376498	9377354	857	*
1	9384538	9385333	796	*
1	9388421	9389217	797	*
1	9400318	9401025	708	*
1	9401628	9402253	626	*
1	9412932	9414114	1183	*
1	9428599	9429608	1010	*
1	9438499	9439120	622	*
1	9455794	9456317	524	*
1	9472815	9473633	819	*
1	9490880	9491430	551	*
1	9494944	9495774	831	*
1	9539114	9540444	1331	*
1	9561521	9561843	323	*
1	9588330	9589860	1531	*
1	9615488	9615924	437	*
1	9626905	9627587	683	*
1	9644712	9645066	355	*
1	9687253	9688148	896	*
1	9688968	9690162	1195	*
1	9700336	9700754	419	*
1	9702276	9702572	297	*
1	9718911	9719793	883	*
1	9724837	9725376	540	*
1	9792225	9792929	705	*
1	9798218	9798796	579	*
1	9822920	9824714	1795	*
1	9825079	9825987	909	*
1	9842607	9843475	869	*
1	9867338	9867950	613	*
1	9874884	9875358	475	*
1	9877902	9878436	535	*
1	9881787	9882251	465	*
1	9890220	9890794	575	*
1	9893123	9893526	404	*
1	9909735	9911245	1511	*
1	9942471	9943702	1232	*
1	9950302	9950712	411	*
1	9960921	9961679	759	*
1	9997000	9997817	818	*
1	10032435	10033821	1387	*
1	10055733	10056147	415	*
1	10074405	10074771	367	*
1	10108054	10108755	702	*
1	10195617	10196004	388	*
1	10209770	10212065	2296	*
1	10338073	10338385	313	*
1	10339841	10340150	310	*
1	10377408	10377941	534	*
1	10387387	10388604	1218	*
1	10398379	10399952	1574	*
1	10415134	10415740	607	*
1	10430123	10431319	1197	*
1	10459063	10459599	537	*
1	10471804	10472805	1002	*
1	10474736	10475692	957	*
1	10494465	10495346	882	*
1	10507401	10507826	426	*
1	10510464	10511172	709	*
1	10528025	10529046	1022	*
1	10537213	10537746	534	*
1	10575663	10575979	317	*
1	10599083	10599959	877	*
1	10634710	10636081	1372	*
1	10646381	10646701	321	*
1	10694161	10695309	1149	*
1	10727686	10728324	639	*
1	10731038	10731421	384	*
1	10755877	10756484	608	*
1	10779210	10779609	400	*
1	10788558	10789095	538	*
1	10796109	10796949	841	*
1	10804065	10804842	778	*
1	10824822	10825258	437	*
1	10831007	10831567	561	*
1	10835889	10836336	448	*
1	10837215	10837737	523	*
1	10866693	10867646	954	*
1	10898037	10898590	554	*
1	10900223	10901819	1597	*
1	10909920	10910430	511	*
1	10960844	10961547	704	*
1	10973515	10973956	442	*
1	10980083	10980512	430	*
1	10990018	10990599	582	*
1	11012135	11013440	1306	*
1	11037608	11038164	557	*
1	11059228	11060600	1373	*
1	11099116	11100219	1104	*
1	11134034	11135224	1191	*
1	11178042	11178815	774	*
1	11180207	11180856	650	*
1	11241681	11242226	546	*
1	11262042	11263021	980	*
1	11272692	11274100	1409	*
1	11281550	11282608	1059	*
1	11292516	11293259	744	*
1	11293856	11294224	369	*
1	11337500	11337908	409	*
1	11478430	11479603	1174	*
1	11645728	11646239	512	*
1	11653073	11653745	673	*
1	11654244	11655059	816	*
1	11663943	11664701	759	*
1	11680548	11681911	1364	*
1	11692957	11693681	725	*
1	11733357	11733691	335	*
1	11735726	11737410	1685	*
1	11748970	11749511	542	*
1	11784963	11785653	691	*
1	11787425	11787935	511	*
1	11790717	11791481	765	*
1	11803132	11803895	764	*
1	11804921	11806554	1634	*
1	11821415	11822026	612	*
1	11838156	11839000	845	*
1	11882892	11883237	346	*
1	11893843	11894282	440	*
1	11901429	11901904	476	*
1	11908074	11909929	1856	*
1	11918674	11919439	766	*
1	11926216	11926706	491	*
1	11929881	11930155	275	*
1	11934238	11935172	935	*
1	11939017	11939664	648	*
1	11940576	11940968	393	*
1	11966844	11967539	696	*
1	11979569	11980836	1268	*
1	12001951	12002603	653	*
1	12019053	12020296	1244	*
1	12030955	12031650	696	*
1	12040374	12041103	730	*
1	12044154	12044631	478	*
1	12051896	12052605	710	*
1	12075565	12076080	516	*
1	12132042	12132741	700	*
1	12132864	12133549	686	*
1	12135638	12135982	345	*
1	12143432	12144349	918	*
1	12153065	12153832	768	*
1	12161569	12162487	919	*
1	12166802	12167349	548	*
1	12208679	12209365	687	*
1	12229636	12231428	1793	*
1	12272047	12272451	405	*
1	12454460	12455393	934	*
1	12477895	12478926	1032	*
1	12480770	12481236	467	*
1	12518809	12519365	557	*
1	12528229	12528894	666	*
1	12539810	12540838	1029	*
1	12541526	12541878	353	*
1	12548780	12550393	1614	*
1	12556299	12556898	600	*
1	12572589	12574589	2001	*
1	12579939	12580692	754	*
1	12588128	12588769	642	*
1	12595628	12596860	1233	*
1	12601809	12602508	700	*
1	12604166	12604738	573	*
1	12615945	12616876	932	*
1	12617966	12619748	1783	*
1	12636219	12637207	989	*
1	12658967	12659361	395	*
1	12760394	12760945	552	*
1	12810702	12811228	527	*
1	12851751	12852260	510	*
1	13748808	13750167	1360	*
1	13766823	13767502	680	*
1	13828714	13829240	527	*
1	13965822	13966462	641	*
1	14055417	14056214	798	*
1	14095020	14095355	336	*
1	14108694	14109493	800	*
1	14140710	14141432	723	*
1	14190451	14190931	481	*
1	14259076	14259692	617	*
1	14282614	14283199	586	*
1	14291128	14291727	600	*
1	14320445	14320971	527	*
1	14332179	14332786	608	*
1	14339891	14340803	913	*
1	14346001	14346699	699	*
1	14360953	14361476	524	*
1	14366251	14366849	599	*
1	14390617	14391270	654	*
1	14413751	14414267	517	*
1	14486313	14487252	940	*
1	14517067	14518001	935	*
1	14522416	14523257	842	*
1	14542897	14543700	804	*
1	14597994	14598959	966	*
1	14625748	14626293	546	*
1	14653346	14654124	779	*
1	14742096	14742884	789	*
1	14765486	14766354	869	*
1	14810652	14811408	757	*
1	14814979	14815891	913	*
1	14822424	14823019	596	*
1	14826104	14826566	463	*
1	14894778	14895405	628	*
1	14910965	14911786	822	*
1	14923713	14925264	1552	*
1	14929456	14930419	964	*
1	14945219	14946005	787	*
1	14946729	14947616	888	*
1	14954054	14954621	568	*
1	14968251	14969070	820	*
1	14970191	14970470	280	*
1	14977367	14977801	435	*
1	14980851	14981276	426	*
1	14988049	14988657	609	*
1	14996001	14997079	1079	*
1	15003118	15003804	687	*
1	15014318	15015005	688	*
1	15027629	15028542	914	*
1	15046437	15047043	607	*
1	15056891	15057243	353	*
1	15089211	15089903	693	*
1	15090257	15090808	552	*
1	15128368	15128891	524	*
1	15152339	15154369	2031	*
1	15178725	15179534	810	*
1	15200362	15201143	782	*
1	15247004	15247647	644	*
1	15261212	15261781	570	*
1	15272369	15272995	627	*
1	15304741	15305085	345	*
1	15323163	15324098	936	*
1	15337496	15338422	927	*
1	15352323	15352793	471	*
1	15356136	15357282	1147	*
1	15409373	15410765	1393	*
1	15415973	15416687	715	*
1	15426729	15427198	470	*
1	15459678	15460329	652	*
1	15501440	15501774	335	*
1	15523888	15525477	1590	*
1	15526399	15527297	899	*
1	15584395	15585410	1016	*
1	15603040	15604017	978	*
1	15616780	15618240	1461	*
1	15678591	15678930	340	*
1	15680828	15681581	754	*
1	15684115	15684433	319	*
1	15741196	15741916	721	*
1	15758693	15759651	959	*
1	15786643	15787136	494	*
1	15788093	15788578	486	*
1	15795119	15795538	420	*
1	15796605	15797217	613	*
1	15799046	15799805	760	*
1	15799933	15801458	1526	*
1	15815402	15815868	467	*
1	15825417	15826168	752	*
1	15833134	15833631	498	*
1	15834325	15836383	2059	*
1	15847146	15848704	1559	*
1	15849241	15850288	1048	*
1	15865826	15866239	414	*
1	15885736	15886842	1107	*
1	15916454	15916805	352	*
1	15919353	15919693	341	*
1	15923293	15923591	299	*
1	15924569	15925289	721	*
1	15949087	15950321	1235	*
1	15952412	15953069	658	*
1	15963888	15964602	715	*
1	15975285	15976332	1048	*
1	15994410	15994897	488	*
1	16007111	16007441	331	*
1	16012670	16013752	1083	*
1	16016009	16016549	541	*
1	16032564	16033298	735	*
1	16038471	16038876	406	*
1	16048548	16049120	573	*
1	16055596	16056531	936	*
1	16068370	16068723	354	*
1	16075983	16077302	1320	*
1	16078983	16079369	387	*
1	16082360	16082840	481	*
1	16112799	16113453	655	*
1	16139333	16140163	831	*
1	16143535	16144318	784	*
1	16144964	16147255	2292	*
1	16154734	16155341	608	*
1	16155575	16156465	891	*
1	16159010	16159469	460	*
1	16164161	16164735	575	*
1	16167366	16168155	790	*
1	16172977	16173918	942	*
1	16174183	16174741	559	*
1	16175571	16176242	672	*
1	16181611	16182616	1006	*
1	16187637	16188125	489	*
1	16188988	16189389	402	*
1	16206188	16207351	1164	*
1	16217001	16217924	924	*
1	16236100	16237700	1601	*
1	16248654	16249136	483	*
1	16249879	16250242	364	*
1	16254243	16254991	749	*
1	16324341	16324839	499	*
1	16351890	16353128	1239	*
1	16366903	16368107	1205	*
1	16375361	16376213	853	*
1	16383795	16384277	483	*
1	16386108	16387181	1074	*
1	16440164	16441520	1357	*
1	16498674	16500152	1479	*
1	16513464	16514609	1146	*
1	16534159	16534577	419	*
1	16534765	16535741	977	*
1	16612611	16614058	1448	*
1	16620937	16621379	443	*
1	16623899	16624539	641	*
1	16643656	16645208	1553	*
1	16677786	16678452	667	*
1	16707447	16708105	659	*
1	16709665	16710103	439	*
1	16727182	16728054	873	*
1	16872514	16873334	821	*
1	16888821	16889985	1165	*
1	16895338	16897048	1711	*
1	16903813	16905744	1932	*
1	16913510	16914686	1177	*
1	16948129	16949353	1225	*
1	16951664	16952034	371	*
1	16960556	16961389	834	*
1	16966890	16967921	1032	*
1	16971750	16972392	643	*
1	16980307	16981101	795	*
1	16984666	16985063	398	*
1	17003619	17004566	948	*
1	17010693	17012329	1637	*
1	17027407	17028061	655	*
1	17053708	17054624	917	*
1	17059510	17060247	738	*
1	17113662	17114336	675	*
1	17119290	17119699	410	*
1	17121114	17121690	577	*
1	17122474	17122748	275	*
1	17125766	17126222	457	*
1	17128283	17129099	817	*
1	17162721	17163342	622	*
1	17167960	17168866	907	*
1	17169331	17169702	372	*
1	17186284	17187002	719	*
1	17189907	17190678	772	*
1	17191231	17191724	494	*
1	17207624	17208430	807	*
1	17211952	17213174	1223	*
1	17226309	17226880	572	*
1	17232973	17234182	1210	*
1	17236857	17237631	775	*
1	17250433	17251153	721	*
1	17251514	17252246	733	*
1	17259180	17259759	580	*
1	17276458	17277144	687	*
1	17287377	17287869	493	*
1	17289638	17290300	663	*
1	17304162	17305126	965	*
1	17335789	17336411	623	*
1	17340374	17340718	345	*
1	17348010	17348687	678	*
1	17369508	17369822	315	*
1	17406018	17406665	648	*
1	17437713	17438893	1181	*
1	17439713	17440176	464	*
1	17460121	17461054	934	*
1	17475700	17476337	638	*
1	17487770	17488255	486	*
1	17494120	17494799	680	*
1	17502179	17502831	653	*
1	17519971	17520408	438	*
1	17527439	17527888	450	*
1	17531545	17532562	1018	*
1	17539572	17540904	1333	*
1	17551006	17552354	1349	*
1	17561349	17562050	702	*
1	17563932	17564298	367	*
1	17564499	17565001	503	*
1	17569103	17570307	1205	*
1	17587637	17588840	1204	*
1	17606838	17607301	464	*
1	17624125	17625426	1302	*
1	17653757	17654200	444	*
1	17696401	17696967	567	*
1	17725093	17725729	637	*
1	17765499	17766402	904	*
1	17768438	17769319	882	*
1	17825959	17826594	636	*
1	17866326	17866889	564	*
1	17874195	17874783	589	*
1	18022028	18022638	611	*
1	18091840	18092415	576	*
1	18234634	18235100	467	*
1	18581320	18581766	447	*
1	18597220	18597787	568	*
1	18618401	18619197	797	*
1	18668785	18669212	428	*
1	18820583	18821311	729	*
1	18875044	18875762	719	*
1	18902001	18903315	1315	*
1	18912943	18913459	517	*
1	18922237	18922816	580	*
1	18926369	18927060	692	*
1	18941097	18942077	981	*
1	18955506	18957329	1824	*
1	19009785	19011531	1747	*
1	19033851	19034514	664	*
1	19045305	19045836	532	*
1	19066065	19066674	610	*
1	19066831	19067858	1028	*
1	19096259	19096764	506	*
1	19113648	19114118	471	*
1	19203354	19203788	435	*
1	19209492	19210917	1426	*
1	19251064	19252466	1403	*
1	19288465	19289433	969	*
1	19311113	19312974	1862	*
1	19341502	19341865	364	*
1	19344393	19344806	414	*
1	19430180	19430641	462	*
1	19440460	19440888	429	*
1	19450646	19451375	730	*
1	19469454	19469903	450	*
1	19484405	19486298	1894	*
1	19582271	19582778	508	*
1	19596293	19597799	1507	*
1	19635681	19636081	401	*
1	19640370	19641162	793	*
1	19643156	19644980	1825	*
1	19650949	19651489	541	*
1	19653520	19654116	597	*
1	19659674	19660151	478	*
1	19704403	19705028	626	*
1	19715516	19716144	629	*
1	19754447	19754919	473	*
1	19758179	19758887	709	*
1	19765435	19766064	630	*
1	19799273	19800636	1364	*
1	19828631	19829169	539	*
1	19861012	19861651	640	*
1	19863719	19864330	612	*
1	19866758	19867313	556	*
1	19882055	19883148	1094	*
1	20100761	20101289	529	*
1	20124369	20124909	541	*
1	20152021	20152717	697	*
1	20195215	20195511	297	*
1	20358654	20359245	592	*
1	20367067	20367476	410	*
1	20411159	20411891	733	*
1	20440800	20441110	311	*
1	20476308	20476890	583	*
1	20485472	20487138	1667	*
1	20493776	20494183	408	*
1	20507398	20508422	1025	*
1	20522314	20522885	572	*
1	20530855	20531556	702	*
1	20552258	20552656	399	*
1	20575233	20576923	1691	*
1	20588590	20590062	1473	*
1	20601041	20602036	996	*
1	20604187	20604767	581	*
1	20612039	20612806	768	*
1	20613485	20614302	818	*
1	20633261	20634160	900	*
1	20634265	20635053	789	*
1	20639903	20640567	665	*
1	20661097	20662082	986	*
1	20696405	20697370	966	*
1	20717459	20718432	974	*
1	20732053	20733649	1597	*
1	20786141	20787834	1694	*
1	20847363	20848755	1393	*
1	21022164	21022917	754	*
1	21063896	21064490	595	*
1	21083087	21083702	616	*
1	21091090	21091545	456	*
1	21149450	21150527	1078	*
1	21175690	21177454	1765	*
1	21194922	21195702	781	*
1	21217740	21218456	717	*
1	21231992	21232668	677	*
1	21255215	21255754	540	*
1	21261622	21263088	1467	*
1	21268268	21268873	606	*
1	21289729	21290808	1080	*
1	21294392	21295291	900	*
1	21302706	21303490	785	*
1	21308776	21309656	881	*
1	21311156	21311433	278	*
1	21317038	21317893	856	*
1	21318626	21319058	433	*
1	21324116	21325163	1048	*
1	21331904	21332606	703	*
1	21335791	21336221	431	*
1	21337862	21339563	1702	*
1	21344602	21346062	1461	*
1	21355951	21356496	546	*
1	21368250	21369047	798	*
1	21370569	21370962	394	*
1	21378991	21379534	544	*
1	21439715	21440505	791	*
1	21490841	21491188	348	*
1	21508874	21509475	602	*
1	21539899	21540363	465	*
1	21573935	21575139	1205	*
1	21586699	21587576	878	*
1	21607505	21608352	848	*
1	21626814	21627420	607	*
1	21631902	21632628	727	*
1	21638469	21639362	894	*
1	21651416	21652170	755	*
1	21659127	21659634	508	*
1	21703329	21703662	334	*
1	21764465	21765587	1123	*
1	21782155	21784063	1909	*
1	21801096	21801556	461	*
1	21861958	21862563	606	*
1	21869597	21870485	889	*
1	21896697	21897374	678	*
1	21909289	21910426	1138	*
1	21920124	21920994	871	*
1	21927359	21927921	563	*
1	21930954	21931888	935	*
1	21935860	21937635	1776	*
1	21942889	21943490	602	*
1	21956483	21957410	928	*
1	21963860	21964498	639	*
1	22019007	22019546	540	*
1	22025051	22026306	1256	*
1	22039620	22040377	758	*
1	22052405	22053827	1423	*
1	22131776	22132927	1152	*
1	22142261	22143865	1605	*
1	22217806	22218167	362	*
1	22275786	22276342	557	*
1	22332748	22333472	725	*
1	22341966	22342549	584	*
1	22388652	22389939	1288	*
1	22414174	22414756	583	*
1	22416484	22416927	444	*
1	22420309	22420836	528	*
1	22428588	22429463	876	*
1	22451619	22452893	1275	*
1	22600409	22601084	676	*
1	22641840	22642551	712	*
1	22673988	22674455	468	*
1	22689469	22689950	482	*
1	22704298	22704909	612	*
1	22739471	22740284	814	*
1	22745967	22746595	629	*
1	22747395	22747778	384	*
1	22750139	22750969	831	*
1	22780719	22781076	358	*
1	22831737	22832647	911	*
1	22870272	22870997	726	*
1	22930191	22930717	527	*
1	22964220	22964592	373	*
1	22969278	22969808	531	*
1	22976359	22977015	657	*
1	23010458	23011374	917	*
1	23019111	23020409	1299	*
1	23100075	23100572	498	*
1	23167319	23169067	1749	*
1	23177398	23178193	796	*
1	23188319	23189399	1081	*
1	23194400	23195266	867	*
1	23196728	23197388	661	*
1	23198226	23198767	542	*
1	23214772	23215029	258	*
1	23216742	23217918	1177	*
1	23224675	23225551	877	*
1	23273287	23273933	647	*
1	23282755	23283386	632	*
1	23343595	23345099	1505	*
1	23367555	23369452	1898	*
1	23402899	23403288	390	*
1	23403607	23404446	840	*
1	23411605	23412420	816	*
1	23423648	23425190	1543	*
1	23451798	23452597	800	*
1	23475312	23475653	342	*
1	23478800	23479398	599	*
1	23483334	23484956	1623	*
1	23496895	23497690	796	*
1	23528114	23528862	749	*
1	23530560	23531704	1145	*
1	23539616	23540339	724	*
1	23544689	23545265	577	*
1	23554535	23555305	771	*
1	23555887	23557164	1278	*
1	23559147	23559806	660	*
1	23562112	23562666	555	*
1	23576605	23577927	1323	*
1	23585299	23586176	878	*
1	23586575	23587016	442	*
1	23591570	23591978	409	*
1	23592997	23594135	1139	*
1	23619367	23620029	663	*
1	23634693	23635810	1118	*
1	23637401	23638303	903	*
1	23651057	23651721	665	*
1	23657664	23658025	362	*
1	23691470	23692395	926	*
1	23718493	23718861	369	*
1	23742969	23744200	1232	*
1	23751126	23751649	524	*
1	23771884	23772593	710	*
1	23777850	23778815	966	*
1	23779730	23780363	634	*
1	23790101	23790454	354	*
1	23790737	23791480	744	*
1	23791584	23792064	481	*
1	23799387	23801127	1741	*
1	23809690	23810061	372	*
1	23824855	23825735	881	*
1	23838077	23838876	800	*
1	23867557	23868772	1216	*
1	23907682	23908342	661	*
1	23916799	23917170	372	*
1	23919885	23920507	623	*
1	23951500	23952183	684	*
1	23958944	23960227	1284	*
1	23979832	23981104	1273	*
1	24003293	24003917	625	*
1	24008396	24008875	480	*
1	24009190	24010040	851	*
1	24018554	24019390	837	*
1	24022444	24023198	755	*
1	24028077	24028437	361	*
1	24045853	24047511	1659	*
1	24048487	24048974	488	*
1	24070800	24071377	578	*
1	24102938	24103399	462	*
1	24107808	24108240	433	*
1	24108361	24109297	937	*
1	24112440	24112876	437	*
1	24117628	24118136	509	*
1	24119842	24120749	908	*
1	24142524	24143441	918	*
1	24149694	24151017	1324	*
1	24186994	24187790	797	*
1	24191919	24192434	516	*
1	24201893	24202578	686	*
1	24236211	24237251	1041	*
1	24266212	24267311	1100	*
1	24283575	24284579	1005	*
1	24289763	24290504	742	*
1	24294258	24295450	1193	*
1	24321578	24322676	1099	*
1	24352003	24352718	716	*
1	24362908	24363373	466	*
1	24364561	24365835	1275	*
1	24391315	24391591	277	*
1	24392155	24392696	542	*
1	24413317	24413981	665	*
1	24415268	24416345	1078	*
1	24502083	24503372	1290	*
1	24515450	24515993	544	*
1	24559055	24559770	716	*
1	24635230	24635556	327	*
1	24642206	24644185	1980	*
1	24683422	24684243	822	*
1	24688554	24689088	535	*
1	24705080	24705993	914	*
1	24712976	24713827	852	*
1	24744809	24746096	1288	*
1	24769960	24770597	638	*
1	24830546	24831045	500	*
1	24847756	24848835	1080	*
1	24862058	24862836	779	*
1	24898132	24898658	527	*
1	24929389	24930736	1348	*
1	24932213	24932619	407	*
1	24949157	24949852	696	*
1	24970413	24970808	396	*
1	25017328	25017955	628	*
1	25022142	25023278	1137	*
1	25030709	25031125	417	*
1	25031849	25032713	865	*
1	25101443	25101802	360	*
1	25232024	25232967	944	*
1	25233093	25233463	371	*
1	25239567	25240501	935	*
1	25246943	25248125	1183	*
1	25267737	25268302	566	*
1	25338056	25339022	967	*
1	25352202	25352593	392	*
1	25371426	25372268	843	*
1	25429893	25431505	1613	*
1	25506679	25507288	610	*
1	25523554	25523893	340	*
1	25543310	25544266	957	*
1	25544581	25545104	524	*
1	25549316	25550173	858	*
1	25556515	25557308	794	*
1	25568330	25569307	978	*
1	25573387	25573914	528	*
1	25608466	25608914	449	*
1	25615908	25617237	1330	*
1	25629900	25630380	481	*
1	25688390	25689209	820	*
1	25695017	25695479	463	*
1	25695943	25696345	403	*
1	25743469	25744456	988	*
1	25799797	25800939	1143	*
1	25810634	25811347	714	*
1	25819426	25821095	1670	*
1	25858598	25859892	1295	*
1	25874761	25876238	1478	*
1	25890330	25890930	601	*
1	25892232	25892924	693	*
1	25895397	25895735	339	*
1	25905052	25907163	2112	*
1	25922654	25923463	810	*
1	25997655	25998748	1094	*
1	26034904	26036326	1423	*
1	26110719	26112633	1915	*
1	26123194	26123800	607	*
1	26144955	26145657	703	*
1	26161609	26162297	689	*
1	26169551	26170463	913	*
1	26177107	26177738	632	*
1	26218903	26219682	780	*
1	26233610	26234985	1376	*
1	26275981	26276553	573	*
1	26279579	26280688	1110	*
1	26284757	26285327	571	*
1	26306130	26307241	1112	*
1	26321145	26321948	804	*
1	26336044	26337025	982	*
1	26357088	26357531	444	*
1	26358789	26359163	375	*
1	26377927	26378893	967	*
1	26387151	26387767	617	*
1	26391482	26391898	417	*
1	26405023	26405808	786	*
1	26416956	26417451	496	*
1	26431881	26432777	897	*
1	26471435	26473350	1916	*
1	26500032	26501754	1723	*
1	26529370	26530845	1476	*
1	26530925	26531638	714	*
1	26620122	26621718	1597	*
1	26636500	26637196	697	*
1	26677338	26678057	720	*
1	26692243	26693373	1131	*
1	26695346	26696409	1064	*
1	26697795	26698483	689	*
1	26705503	26706327	825	*
1	26723227	26724043	817	*
1	26771329	26772248	920	*
1	26787543	26788700	1158	*
1	26826118	26827557	1440	*
1	26848876	26849868	993	*
1	26853113	26853448	336	*
1	26862803	26863593	791	*
1	26863726	26865670	1945	*
1	26889593	26890689	1097	*
1	26899793	26900708	916	*
1	26907165	26908010	846	*
1	26921241	26922456	1216	*
1	26966854	26967262	409	*
1	26993239	26994470	1232	*
1	26997686	26998111	426	*
1	26999348	27000021	674	*
1	27009438	27010277	840	*
1	27010825	27011393	569	*
1	27012672	27013453	782	*
1	27031273	27031946	674	*
1	27044517	27045078	562	*
1	27097414	27097735	322	*
1	27098995	27100163	1169	*
1	27111884	27112562	679	*
1	27122428	27123108	681	*
1	27141597	27142133	537	*
1	27154585	27155661	1077	*
1	27192006	27193094	1089	*
1	27197891	27198447	557	*
1	27233999	27235664	1666	*
1	27284601	27285242	642	*
1	27296717	27297053	337	*
1	27300608	27301333	726	*
1	27306805	27307457	653	*
1	27321839	27322774	936	*
1	27349276	27350290	1015	*
1	27365368	27367383	2016	*
1	27392117	27393013	897	*
1	27416500	27416993	494	*
1	27436550	27436916	367	*
1	27489627	27490927	1301	*
1	27518147	27518754	608	*
1	27525536	27526167	632	*
1	27528091	27529448	1358	*
1	27538807	27539077	271	*
1	27540131	27540925	795	*
1	27542289	27543230	942	*
1	27556765	27558435	1671	*
1	27568159	27569281	1123	*
1	27575144	27576252	1109	*
1	27589654	27590534	881	*
1	27590954	27591633	680	*
1	27601725	27602429	705	*
1	27603446	27604543	1098	*
1	27643721	27644299	579	*
1	27650572	27651204	633	*
1	27658843	27660345	1503	*
1	27663159	27663487	329	*
1	27671901	27672718	818	*
1	27686367	27687157	791	*
1	27725369	27726630	1262	*
1	27772755	27773978	1224	*
1	27817179	27817646	468	*
1	27830346	27831460	1115	*
1	27857872	27858789	918	*
1	27872245	27872908	664	*
1	27875101	27875672	572	*
1	27914049	27915043	995	*
1	27934765	27935334	570	*
1	27959366	27960398	1033	*
1	28087690	28089167	1478	*
1	28104889	28105559	671	*
1	28153222	28153512	291	*
1	28208884	28209191	308	*
1	28232532	28233162	631	*
1	28235598	28236844	1247	*
1	28247095	28247734	640	*
1	28248938	28249283	346	*
1	28249420	28249810	391	*
1	28259100	28260672	1573	*
1	28313757	28314559	803	*
1	28328686	28329460	775	*
1	28346193	28346742	550	*
1	28351565	28352520	956	*
1	28359670	28359992	323	*
1	28369362	28370612	1251	*
1	28391840	28392557	718	*
1	28409788	28410306	519	*
1	28416428	28416830	403	*
1	28417346	28418219	874	*
1	28437251	28438515	1265	*
1	28449790	28450471	682	*
1	28471490	28471998	509	*
1	28505541	28506704	1164	*
1	28517695	28519336	1642	*
1	28552533	28554005	1473	*
1	28581066	28582333	1268	*
1	28591892	28593169	1278	*
1	28594627	28595277	651	*
1	28601645	28602191	547	*
1	28642268	28643720	1453	*
1	28648017	28649457	1441	*
1	28653904	28654196	293	*
1	28668157	28669798	1642	*
1	28721868	28722259	392	*
1	28736322	28738047	1726	*
1	28784909	28785865	957	*
1	28846073	28846572	500	*
1	28859860	28861181	1322	*
1	28865898	28866352	455	*
1	28877097	28877592	496	*
1	28882061	28882488	428	*
1	28884744	28885370	627	*
1	28886753	28888507	1755	*
1	28914047	28915532	1486	*
1	28972008	28972912	905	*
1	29122020	29123325	1306	*
1	29124129	29125068	940	*
1	29133631	29134541	911	*
1	29181081	29182375	1295	*
1	29197509	29197883	375	*
1	29202747	29203415	669	*
1	29230546	29231330	785	*
1	29236171	29236884	714	*
1	29239166	29239602	437	*
1	29245618	29246321	704	*
1	29257029	29257955	927	*
1	29271625	29272413	789	*
1	29282898	29283718	821	*
1	29453506	29453988	483	*
1	29513332	29513745	414	*
1	29569856	29570726	871	*
1	29584791	29585316	526	*
1	29640078	29640608	531	*
1	29649423	29650243	821	*
1	29697981	29698428	448	*
1	29703591	29703900	310	*
1	29707007	29707304	298	*
1	29708887	29710176	1290	*
1	29793032	29793568	537	*
1	29974316	29974754	439	*
1	30058968	30059299	332	*
1	30083641	30084449	809	*
1	30111513	30111797	285	*
1	30191138	30191763	626	*
1	30525778	30526542	765	*
1	30618344	30618828	485	*
1	30657453	30658219	767	*
1	30670271	30671132	862	*
1	30707961	30708421	461	*
1	30717905	30719588	1684	*
1	30778427	30778717	291	*
1	30779605	30779930	326	*
1	30782364	30782838	475	*
1	30801579	30802243	665	*
1	30807203	30807870	668	*
1	30816314	30817154	841	*
1	30823676	30824949	1274	*
1	30854150	30854464	315	*
1	30909902	30910397	496	*
1	30911191	30911699	509	*
1	30929243	30930118	876	*
1	30966694	30967360	667	*
1	30976958	30977497	540	*
1	31064932	31066217	1286	*
1	31111226	31111771	546	*
1	31135693	31136611	919	*
1	31154612	31155876	1265	*
1	31162587	31163053	467	*
1	31170582	31171491	910	*
1	31181490	31182770	1281	*
1	31238889	31240249	1361	*
1	31296410	31297767	1358	*
1	31372949	31374091	1143	*
1	31394486	31395236	751	*
1	31412975	31414200	1226	*
1	31422425	31423067	643	*
1	31482718	31483943	1226	*
1	31497535	31497977	443	*
1	31520765	31521328	564	*
1	31523745	31524122	378	*
1	31530980	31531829	850	*
1	31548633	31550186	1554	*
1	31573776	31574477	702	*
1	31575472	31576674	1203	*
1	31583984	31584575	592	*
1	31587809	31589280	1472	*
1	31591708	31592127	420	*
1	31593872	31594484	613	*
1	31644324	31645453	1130	*
1	31666217	31667023	807	*
1	31669601	31670576	976	*
1	31689643	31690283	641	*
1	31700747	31701947	1201	*
1	31712473	31713118	646	*
1	31714649	31715883	1235	*
1	31736583	31737139	557	*
1	31745306	31747002	1697	*
1	31753726	31754354	629	*
1	31762463	31763397	935	*
1	31769495	31770448	954	*
1	31775460	31776100	641	*
1	31788130	31789772	1643	*
1	31798176	31799367	1192	*
1	31815716	31816296	581	*
1	31897401	31898267	867	*
1	31937390	31938106	717	*
1	31938198	31938904	707	*
1	31939585	31940216	632	*
1	31944221	31945108	888	*
1	31954390	31955531	1142	*
1	31955995	31956527	533	*
1	31963903	31964665	763	*
1	31977701	31978143	443	*
1	32003518	32003897	380	*
1	32013226	32014975	1750	*
1	32062255	32063189	935	*
1	32066346	32066845	500	*
1	32072383	32073652	1270	*
1	32100910	32101798	889	*
1	32107771	32108916	1146	*
1	32133205	32133905	701	*
1	32179247	32180835	1589	*
1	32200196	32201010	815	*
1	32205350	32206417	1068	*
1	32208877	32209223	347	*
1	32215632	32216176	545	*
1	32221840	32222918	1079	*
1	32235781	32236623	843	*
1	32240227	32241788	1562	*
1	32246787	32247523	737	*
1	32247984	32248670	687	*
1	32291597	32292818	1222	*
1	32335130	32336627	1498	*
1	32351037	32352372	1336	*
1	32393926	32395236	1311	*
1	32400817	32401503	687	*
1	32413751	32414290	540	*
1	32448334	32449049	716	*
1	32449126	32449488	363	*
1	32485457	32486091	635	*
1	32500094	32501271	1178	*
1	32520460	32521127	668	*
1	32539027	32540379	1353	*
1	32611939	32612757	819	*
1	32650228	32651827	1600	*
1	32701495	32704287	2793	*
1	32712166	32712700	535	*
1	32716443	32717193	751	*
1	32724574	32725818	1245	*
1	32729933	32730379	447	*
1	32741116	32741980	865	*
1	32742225	32743700	1476	*
1	32759235	32759922	688	*
1	32760010	32760645	636	*
1	32761000	32762004	1005	*
1	32769499	32770081	583	*
1	32772929	32773409	481	*
1	32775199	32776007	809	*
1	32789255	32789923	669	*
1	32795453	32796155	703	*
1	32816658	32818590	1933	*
1	32876656	32877035	380	*
1	32878243	32878969	727	*
1	32886366	32886892	527	*
1	32892748	32893564	817	*
1	32901042	32901863	822	*
1	32933715	32934471	757	*
1	32963609	32965152	1544	*
1	32981096	32981774	679	*
1	32988765	32989606	842	*
1	32992342	32993102	761	*
1	33007192	33007684	493	*
1	33036028	33037247	1220	*
1	33050128	33050872	745	*
1	33055149	33055950	802	*
1	33060427	33061300	874	*
1	33072521	33073122	602	*
1	33080819	33081507	689	*
1	33086232	33086887	656	*
1	33099143	33099967	825	*
1	33126904	33127633	730	*
1	33152860	33153441	582	*
1	33163471	33164028	558	*
1	33180554	33182319	1766	*
1	33218721	33219040	320	*
1	33220831	33221543	713	*
1	33244176	33244592	417	*
1	33255404	33256254	851	*
1	33256381	33257311	931	*
1	33295459	33295830	372	*
1	33298491	33299158	668	*
1	33306429	33307583	1155	*
1	33327717	33328328	612	*
1	33349103	33350657	1555	*
1	33367595	33368272	678	*
1	33430309	33431424	1116	*
1	33442967	33444177	1211	*
1	33455681	33456246	566	*
1	33470513	33470932	420	*
1	33472147	33473006	860	*
1	33612762	33613217	456	*
1	33633117	33633676	560	*
1	33634851	33635181	331	*
1	34597814	34598255	442	*
1	34626373	34626888	516	*
1	34681510	34681856	347	*
1	34742559	34743152	594	*
1	34755050	34755684	635	*
1	34762582	34764046	1465	*
1	34781020	34781984	965	*
1	34783527	34783965	439	*
1	34786476	34786826	351	*
1	34852639	34853275	637	*
1	34858935	34860248	1314	*
1	34865691	34866840	1150	*
1	34983987	34985767	1781	*
1	35031062	35032371	1310	*
1	35062874	35063305	432	*
1	35079021	35079983	963	*
1	35191861	35193745	1885	*
1	35202105	35202536	432	*
1	35268343	35269455	1113	*
1	35451035	35451607	573	*
1	35505805	35506785	981	*
1	35556824	35558019	1196	*
1	35564515	35564992	478	*
1	35568944	35569261	318	*
1	35573122	35573841	720	*
1	35641181	35642246	1066	*
1	35707331	35708343	1013	*
1	35715536	35715985	450	*
1	35717790	35719352	1563	*
1	35726695	35727429	735	*
1	35769155	35770399	1245	*
1	35807451	35809252	1802	*
1	35882880	35884183	1304	*
1	35930206	35931878	1673	*
1	36088441	36089826	1386	*
1	36096890	36097389	500	*
1	36099449	36100342	894	*
1	36133392	36134101	710	*
1	36148986	36150074	1089	*
1	36150549	36151261	713	*
1	36155515	36157286	1772	*
1	36160881	36161421	541	*
1	36187746	36188589	844	*
1	36203472	36204555	1084	*
1	36217664	36217969	306	*
1	36223718	36225170	1453	*
1	36248297	36249186	890	*
1	36266392	36266774	383	*
1	36285442	36285943	502	*
1	36299825	36300419	595	*
1	36305968	36307482	1515	*
1	36322982	36324013	1032	*
1	36342675	36343298	624	*
1	36350713	36351984	1272	*
1	36373749	36375138	1390	*
1	36385039	36387140	2102	*
1	36397182	36398209	1028	*
1	36408501	36409136	636	*
1	36420755	36421362	608	*
1	36450067	36451018	952	*
1	36463500	36464886	1387	*
1	36516371	36516865	495	*
1	36553703	36554366	664	*
1	36575940	36576415	476	*
1	36609284	36609584	301	*
1	36650313	36650802	490	*
1	36703685	36704105	421	*
1	37177286	37177585	300	*
1	37434163	37434842	680	*
1	37454684	37455558	875	*
1	37471392	37472255	864	*
1	37474241	37474767	527	*
1	37476441	37477392	952	*
1	37479626	37480152	527	*
1	37486909	37487700	792	*
1	37499020	37499626	607	*
1	37513893	37515336	1444	*
1	37534424	37534868	445	*
1	37553881	37554601	721	*
1	37595383	37596423	1041	*
1	37634300	37634908	609	*
1	37690137	37690854	718	*
1	37691500	37692891	1392	*
1	37752555	37753537	983	*
1	37793463	37794640	1178	*
1	37807528	37809325	1798	*
1	37859024	37860594	1571	*
1	37865408	37865825	418	*
1	37931151	37932245	1095	*
1	37946119	37947282	1164	*
1	37989311	37990462	1152	*
1	37995717	37996852	1136	*
1	38000233	38001017	785	*
1	38005142	38005949	808	*
1	38012217	38013348	1132	*
1	38029984	38030482	499	*
1	38046685	38047704	1020	*
1	38064133	38064785	653	*
1	38088345	38088776	432	*
1	38138374	38139300	927	*
1	38221026	38221611	586	*
1	38589013	38589581	569	*
1	38786581	38786941	361	*
1	38817871	38818647	777	*
1	38835215	38835620	406	*
1	38858843	38860482	1640	*
1	38872732	38873928	1197	*
1	38941245	38942204	960	*
1	38990702	38992451	1750	*
1	39025861	39027186	1326	*
1	39080994	39081986	993	*
1	39092205	39092688	484	*
1	39098359	39099087	729	*
1	39104948	39106673	1726	*
1	39130287	39130720	434	*
1	39159194	39159603	410	*
1	39178345	39179162	818	*
1	39183571	39184336	766	*
1	39191621	39192739	1119	*
1	39204439	39205036	598	*
1	39258604	39259164	561	*
1	39387475	39387842	368	*
1	39391843	39392404	562	*
1	39395496	39395853	358	*
1	39398320	39399105	786	*
1	39408294	39409774	1481	*
1	39490910	39492007	1098	*
1	39538972	39539583	612	*
1	39559140	39559963	824	*
1	39575350	39576194	845	*
1	39576363	39577119	757	*
1	39605958	39606782	825	*
1	39609513	39610172	660	*
1	39632672	39633478	807	*
1	39639382	39640202	821	*
1	39653511	39654063	553	*
1	39691086	39691770	685	*
1	39701645	39702273	629	*
1	39738608	39739508	901	*
1	39788388	39789670	1283	*
1	39799037	39800255	1219	*
1	39816440	39817190	751	*
1	39845555	39846034	480	*
1	39852168	39852898	731	*
1	39882766	39883747	982	*
1	39892506	39893541	1036	*
1	39900812	39902606	1795	*
1	39919508	39919905	398	*
1	39954761	39956352	1592	*
1	39960392	39960885	494	*
1	39973463	39973817	355	*
1	40015131	40015553	423	*
1	40032329	40032622	294	*
1	40039518	40041104	1587	*
1	40078437	40078880	444	*
1	40084753	40085270	518	*
1	40096737	40097849	1113	*
1	40143800	40144386	587	*
1	40161086	40162104	1019	*
1	40257363	40258714	1352	*
1	40315233	40315803	571	*
1	40315936	40317061	1126	*
1	40338400	40339086	687	*
1	40373383	40374990	1608	*
1	40449723	40451214	1492	*
1	40476911	40478075	1165	*
1	40508336	40509370	1035	*
1	40531222	40532166	945	*
1	40583288	40583812	525	*
1	40612286	40612926	641	*
1	40665298	40666121	824	*
1	40668815	40669128	314	*
1	40691376	40692813	1438	*
1	40703267	40703726	460	*
1	40711343	40712060	718	*
1	40774152	40774535	384	*
1	40783311	40784005	695	*
1	40797007	40797326	320	*
1	40802133	40802839	707	*
1	40848533	40848895	363	*
1	40849841	40850379	539	*
1	40861291	40862938	1648	*
1	40875660	40876144	485	*
1	40877628	40878271	644	*
1	40897469	40897917	449	*
1	40898414	40899045	632	*
1	40901856	40902517	662	*
1	40944317	40944764	448	*
1	40952265	40953017	753	*
1	40967399	40968492	1094	*
1	40979266	40980717	1452	*
1	41003402	41004193	792	*
1	41102007	41102899	893	*
1	41109284	41110361	1078	*
1	41123074	41123764	691	*
1	41152347	41153275	929	*
1	41241223	41242809	1587	*
1	41268130	41268744	615	*
1	41322897	41323247	351	*
1	41325784	41326196	413	*
1	41341954	41342544	591	*
1	41360885	41362228	1344	*
1	41371709	41372621	913	*
1	41381122	41383071	1950	*
1	41387674	41388097	424	*
1	41414844	41415306	463	*
1	41418835	41419450	616	*
1	41423463	41424426	964	*
1	41432368	41433586	1219	*
1	41435599	41436005	407	*
1	41442476	41443264	789	*
1	41448303	41448796	494	*
1	41455535	41456321	787	*
1	41474482	41475360	879	*
1	41476672	41477388	717	*
1	41482236	41483457	1222	*
1	41484147	41485244	1098	*
1	41485654	41485990	337	*
1	41493030	41493698	669	*
1	41496137	41496649	513	*
1	41498534	41499257	724	*
1	41501518	41502142	625	*
1	41514354	41514827	474	*
1	41514879	41515639	761	*
1	41515851	41516640	790	*
1	41546481	41547093	613	*
1	41573888	41574683	796	*
1	41618053	41618432	380	*
1	41626048	41627372	1325	*
1	41649988	41650498	511	*
1	41661448	41663201	1754	*
1	41672036	41672845	810	*
1	41712606	41713234	629	*
1	41713646	41714329	684	*
1	41782913	41783712	800	*
1	41812025	41812953	929	*
1	41823398	41823860	463	*
1	41862182	41863426	1245	*
1	41870047	41870599	553	*
1	41900505	41901253	749	*
1	41901691	41902653	963	*
1	41917817	41918447	631	*
1	41920656	41921015	360	*
1	41954435	41955085	651	*
1	41955423	41956181	759	*
1	42003398	42003836	439	*
1	42035159	42036300	1142	*
1	42146859	42147224	366	*
1	42165333	42166402	1070	*
1	42176980	42177258	279	*
1	42214396	42215068	673	*
1	42334254	42335992	1739	*
1	42380234	42381191	958	*
1	42420852	42421209	358	*
1	42439877	42440374	498	*
1	42455854	42457243	1390	*
1	42462773	42463732	960	*
1	42657934	42659233	1300	*
1	42681722	42683330	1609	*
1	42756836	42757326	491	*
1	42765838	42767790	1953	*
1	42777897	42778206	310	*
1	42816364	42817641	1278	*
1	42846097	42847395	1299	*
1	42923026	42923365	340	*
1	42923886	42925206	1321	*
1	42936198	42937582	1385	*
1	42940924	42941439	516	*
1	42941711	42942244	534	*
1	42943138	42943769	632	*
1	42957822	42959498	1677	*
1	42962608	42963021	414	*
1	42966942	42967638	697	*
1	43008194	43009033	840	*
1	43021604	43022176	573	*
1	43048685	43049384	700	*
1	43073484	43074002	519	*
1	43119893	43120576	684	*
1	43147497	43148055	559	*
1	43171732	43172901	1170	*
1	43206561	43207841	1281	*
1	43227095	43227661	567	*
1	43238135	43238450	316	*
1	43256611	43257215	605	*
1	43293300	43294985	1686	*
1	43348464	43349963	1500	*
1	43358097	43359526	1430	*
1	43366844	43368625	1782	*
1	43373021	43373939	919	*
1	43389367	43390269	903	*
1	43414465	43415194	730	*
1	43452792	43454192	1401	*
1	43454350	43454809	460	*
1	43472469	43473182	714	*
1	43523122	43523512	391	*
1	43530645	43532151	1507	*
1	43582059	43582778	720	*
1	43649504	43650902	1399	*
1	43706626	43708169	1544	*
1	43763285	43764024	740	*
1	43774396	43774761	366	*
1	43776434	43776813	380	*
1	43783141	43784254	1114	*
1	43821941	43822684	744	*
1	43834902	43835824	923	*
1	43836380	43836951	572	*
1	43853094	43854007	914	*
1	43858112	43859007	896	*
1	43868507	43869057	551	*
1	43872291	43872722	432	*
1	43879203	43880191	989	*
1	43884985	43885945	961	*
1	43933177	43935151	1975	*
1	43946186	43947980	1795	*
1	43969529	43970330	802	*
1	43974238	43975463	1226	*
1	43979555	43980335	781	*
1	43991012	43992301	1290	*
1	44005634	44006250	617	*
1	44029703	44031810	2108	*
1	44035926	44037147	1222	*
1	44047713	44048585	873	*
1	44048832	44049247	416	*
1	44049423	44050504	1082	*
1	44101083	44102036	954	*
1	44154681	44155557	877	*
1	44213172	44213968	797	*
1	44217752	44218153	402	*
1	44293705	44294351	647	*
1	44325911	44326742	832	*
1	44327575	44328572	998	*
1	44354783	44355694	912	*
1	44377881	44378662	782	*
1	44389848	44390879	1032	*
1	44404989	44406975	1987	*
1	44423475	44424361	887	*
1	44485106	44486395	1290	*
1	44531842	44532744	903	*
1	44553767	44554101	335	*
1	44568158	44568484	327	*
1	44594955	44595684	730	*
1	44617446	44617784	339	*
1	44631410	44632763	1354	*
1	44652607	44653255	649	*
1	44655409	44655881	473	*
1	44673687	44675047	1361	*
1	44707050	44707559	510	*
1	44714940	44715334	395	*
1	44721076	44722379	1304	*
1	44730463	44731530	1068	*
1	44738133	44738909	777	*
1	44739336	44740321	986	*
1	44775098	44776863	1766	*
1	44786112	44786901	790	*
1	44793390	44794085	696	*
1	44799663	44801071	1409	*
1	44806968	44808771	1804	*
1	44819212	44820770	1559	*
1	44835813	44836247	435	*
1	44842761	44843704	944	*
1	44924797	44925425	629	*
1	44947049	44947901	853	*
1	44968056	44968737	682	*
1	44970269	44970721	453	*
1	44985742	44986943	1202	*
1	45010550	45011538	989	*
1	45011801	45013074	1274	*
1	45018664	45019167	504	*
1	45179675	45180574	900	*
1	45205232	45207000	1769	*
1	45246721	45247184	464	*
1	45265940	45267231	1292	*
1	45303268	45304464	1197	*
1	45326561	45328366	1806	*
1	45329440	45329905	466	*
1	45339517	45340797	1281	*
1	45356230	45356623	394	*
1	45393609	45394391	783	*
1	45410774	45411912	1139	*
1	45490579	45491724	1146	*
1	45499576	45500768	1193	*
1	45508181	45509204	1024	*
1	45521211	45522633	1423	*
1	45522692	45523096	405	*
1	45550404	45551404	1001	*
1	45569573	45570389	817	*
1	45583241	45585182	1942	*
1	45590096	45590600	505	*
1	45686089	45687627	1539	*
1	45750145	45751151	1007	*
1	45802621	45804488	1868	*
1	45881592	45882082	491	*
1	45891958	45892851	894	*
1	45954330	45954891	562	*
1	46036912	46037608	697	*
1	46103041	46103540	500	*
1	46132346	46133689	1344	*
1	46134817	46135358	542	*
1	46171165	46172206	1042	*
1	46174376	46175211	836	*
1	46179530	46179795	266	*
1	46183034	46183864	831	*
1	46197844	46199085	1242	*
1	46223482	46224030	549	*
1	46246900	46248659	1760	*
1	46301453	46303440	1988	*
1	46303524	46303995	472	*
1	46333505	46334033	529	*
1	46339603	46341389	1787	*
1	46347898	46348600	703	*
1	46401915	46402585	671	*
1	46406129	46406984	856	*
1	46442297	46443214	918	*
1	46446855	46447178	324	*
1	46477421	46477779	359	*
1	46489213	46490254	1042	*
1	46516660	46517561	902	*
1	46520070	46520994	925	*
1	46522153	46522938	786	*
1	46527885	46528376	492	*
1	46532918	46533722	805	*
1	46548020	46548395	376	*
1	46603588	46604603	1016	*
1	46611718	46612216	499	*
1	46616131	46617319	1189	*
1	46643159	46643893	735	*
1	46667544	46668784	1241	*
1	46718546	46719662	1117	*
1	46725063	46725602	540	*
1	46747690	46748053	364	*
1	47013061	47013941	881	*
1	47030362	47031639	1278	*
1	47069034	47069802	769	*
1	47179060	47179846	787	*
1	47189879	47190756	878	*
1	47253902	47254367	466	*
1	47313372	47314608	1237	*
1	47333309	47334927	1619	*
1	47388567	47389266	700	*
1	47424378	47424941	564	*
1	47436469	47438406	1938	*
1	47449929	47450454	526	*
1	47477977	47478543	567	*
1	47487753	47488377	625	*
1	47507813	47508863	1051	*
1	47521093	47521887	795	*
1	47527698	47528008	311	*
1	47534117	47534864	748	*
1	47569646	47570222	577	*
1	47602259	47602791	533	*
1	47650216	47650774	559	*
1	47684892	47685565	674	*
1	47709327	47710200	874	*
1	47710260	47710979	720	*
1	47726030	47726602	573	*
1	47728423	47728687	265	*
1	47738578	47739158	581	*
1	47758232	47759490	1259	*
1	47763561	47764264	704	*
1	47797552	47798068	517	*
1	47809237	47809904	668	*
1	47871647	47872455	809	*
1	47894508	47895298	791	*
1	47905831	47906952	1122	*
1	47914123	47915001	879	*
1	47926392	47926968	577	*
1	47933376	47933813	438	*
1	47934094	47935209	1116	*
1	47940811	47941221	411	*
1	47941631	47942597	967	*
1	47991149	47991499	351	*
1	47992667	47993211	545	*
1	47996405	47997955	1551	*
1	48007005	48007645	641	*
1	48017664	48018191	528	*
1	48019614	48020373	760	*
1	48026183	48026677	495	*
1	48039143	48039687	545	*
1	48049915	48050588	674	*
1	48052165	48053004	840	*
1	48069435	48070856	1422	*
1	48077668	48078407	740	*
1	48080685	48081088	404	*
1	48082249	48082947	699	*
1	48093681	48094480	800	*
1	48105171	48105525	355	*
1	48109270	48109744	475	*
1	48114640	48115430	791	*
1	48186327	48186853	527	*
1	48201981	48202656	676	*
1	48369099	48369966	868	*
1	48471693	48472766	1074	*
1	48494224	48494795	572	*
1	48498150	48498428	279	*
1	48530729	48531128	400	*
1	48572647	48573085	439	*
1	48619427	48619975	549	*
1	48677361	48677660	300	*
1	48693762	48694289	528	*
1	48741373	48741910	538	*
1	48817565	48817889	325	*
1	48852873	48853551	679	*
1	48859259	48859793	535	*
1	48878222	48879054	833	*
1	48916122	48916765	644	*
1	48917830	48918215	386	*
1	48931316	48932302	987	*
1	49257178	49258032	855	*
1	49331293	49331859	567	*
1	49364708	49365026	319	*
1	50272006	50272296	291	*
1	50332847	50333892	1046	*
1	50348516	50349435	920	*
1	50368339	50368935	597	*
1	50423305	50424030	726	*
1	50873385	50874130	746	*
1	50959287	50960823	1537	*
1	50968043	50969176	1134	*
1	50969226	50970380	1155	*
1	50976449	50978582	2134	*
1	50984970	50985616	647	*
1	51063123	51063634	512	*
1	51070595	51070999	405	*
1	51072036	51072428	393	*
1	51235833	51237243	1411	*
1	51261221	51261842	622	*
1	51264412	51264907	496	*
1	51296471	51297285	815	*
1	51313911	51314712	802	*
1	51331205	51331780	576	*
1	51344638	51345308	671	*
1	51517988	51519585	1598	*
1	51535025	51535388	364	*
1	51541253	51541792	540	*
1	51558089	51559044	956	*
1	51567425	51568185	761	*
1	51569410	51570336	927	*
1	51616851	51617894	1044	*
1	51622435	51622892	458	*
1	51636913	51637525	613	*
1	51642444	51643195	752	*
1	51648238	51648909	672	*
1	51660678	51661648	971	*
1	51671512	51672399	888	*
1	51699237	51699913	677	*
1	51729138	51730282	1145	*
1	51736750	51737140	391	*
1	51877897	51879379	1483	*
1	51897331	51898018	688	*
1	51990280	51991049	770	*
1	52002117	52002672	556	*
1	52032387	52034020	1634	*
1	52054852	52055855	1004	*
1	52056009	52056975	967	*
1	52127285	52127916	632	*
1	52141664	52143049	1386	*
1	52159289	52159757	469	*
1	52176446	52177283	838	*
1	52296309	52296695	387	*
1	52365134	52366679	1546	*
1	52403647	52405068	1422	*
1	52552171	52553942	1772	*
1	52574517	52575277	761	*
1	52602111	52602844	734	*
1	52632862	52633616	755	*
1	52662527	52663270	744	*
1	52686263	52686691	429	*
1	52697591	52698749	1159	*
1	52702901	52703730	830	*
1	52708279	52708836	558	*
1	52726120	52727464	1345	*
1	52833429	52834126	698	*
1	52842430	52844261	1832	*
1	52904639	52905431	793	*
1	52921165	52922148	984	*
1	52926966	52928301	1336	*
1	53014718	53015120	403	*
1	53047679	53048398	720	*
1	53135283	53136133	851	*
1	53145719	53146778	1060	*
1	53172662	53173214	553	*
1	53185540	53186044	505	*
1	53196301	53197671	1371	*
1	53220095	53221015	921	*
1	53238157	53239105	949	*
1	53292945	53293608	664	*
1	53325735	53327839	2105	*
1	53328012	53328502	491	*
1	53381617	53382386	770	*
1	53393333	53393844	512	*
1	53412989	53414066	1078	*
1	53444609	53445073	465	*
1	53448797	53449485	689	*
1	53470046	53470585	540	*
1	53477498	53478042	545	*
1	53485448	53486045	598	*
1	53509291	53509669	379	*
1	53512061	53512976	916	*
1	53541803	53542931	1129	*
1	53572226	53573080	855	*
1	53582119	53582760	642	*
1	53625858	53626536	679	*
1	53639069	53639882	814	*
1	53684845	53686136	1292	*
1	53697826	53698724	899	*
1	53732926	53733541	616	*
[truncated: 61,278 more rows]

## Sheet: 0h Hpx siHIF1b
seqnames	start	end	width	strand
1	778291	779326	1036	*
1	827108	827894	787	*
1	869553	870273	721	*
1	904594	904946	353	*
1	906752	907260	509	*
1	910621	911625	1005	*
1	938138	938832	695	*
1	943125	943503	379	*
1	959093	959767	675	*
1	960357	961137	781	*
1	965943	967402	1460	*
1	975895	976665	771	*
1	999847	1000948	1102	*
1	1001465	1002158	694	*
1	1013167	1014660	1494	*
1	1019286	1020414	1129	*
1	1021083	1021771	689	*
1	1024557	1025501	945	*
1	1058450	1059979	1530	*
1	1063838	1064537	700	*
1	1073792	1074698	907	*
1	1079374	1080604	1231	*
1	1115738	1116884	1147	*
1	1121731	1122581	851	*
1	1157369	1158542	1174	*
1	1208004	1208756	753	*
1	1231157	1232423	1267	*
1	1243950	1244678	729	*
1	1258506	1258996	491	*
1	1264772	1265565	794	*
1	1273319	1274740	1422	*
1	1281503	1282431	929	*
1	1290967	1292304	1338	*
1	1305322	1305968	647	*
1	1307936	1308788	853	*
1	1318241	1318637	397	*
1	1324280	1325388	1109	*
1	1330674	1331634	961	*
1	1344661	1346292	1632	*
1	1347676	1348352	677	*
1	1360264	1360963	700	*
1	1374678	1375738	1061	*
1	1398988	1400509	1522	*
1	1406589	1407992	1404	*
1	1440728	1441953	1226	*
1	1471340	1472138	799	*
1	1504728	1505817	1090	*
1	1511280	1512461	1182	*
1	1554537	1555396	860	*
1	1574140	1575497	1358	*
1	1615069	1616780	1712	*
1	1627177	1629051	1875	*
1	1658672	1659560	889	*
1	1686181	1687045	865	*
1	1692324	1693517	1194	*
1	1723968	1724856	889	*
1	1740953	1741454	502	*
1	1758613	1759663	1051	*
1	1764239	1764602	364	*
1	1777633	1779236	1604	*
1	1782567	1783277	711	*
1	1858664	1859767	1104	*
1	1889902	1892091	2190	*
1	1894451	1894902	452	*
1	1906243	1907908	1666	*
1	1908405	1909483	1079	*
1	1918907	1920029	1123	*
1	1943809	1944506	698	*
1	1959772	1960552	781	*
1	1968905	1969808	904	*
1	2015050	2015377	328	*
1	2046509	2046778	270	*
1	2049518	2050885	1368	*
1	2104327	2105557	1231	*
1	2132862	2133948	1087	*
1	2139800	2140421	622	*
1	2174151	2174788	638	*
1	2189329	2190644	1316	*
1	2194622	2195733	1112	*
1	2199114	2199765	652	*
1	2207188	2208873	1686	*
1	2212444	2213378	935	*
1	2227290	2228046	757	*
1	2231698	2232165	468	*
1	2234257	2235027	771	*
1	2314410	2315024	615	*
1	2322253	2323056	804	*
1	2330750	2331259	510	*
1	2360586	2361469	884	*
1	2381686	2382468	783	*
1	2391024	2392372	1349	*
1	2412013	2413587	1575	*
1	2447902	2448450	549	*
1	2801504	2802142	639	*
1	2821925	2822470	546	*
1	2922051	2922375	325	*
1	3066152	3066662	511	*
1	3312909	3313832	924	*
1	3319712	3320432	721	*
1	3410187	3410684	498	*
1	3424578	3425064	487	*
1	3453129	3453641	513	*
1	3454058	3455145	1088	*
1	3471220	3472109	890	*
1	3481847	3482835	989	*
1	3491221	3492209	989	*
1	3503790	3505120	1331	*
1	3509825	3510867	1043	*
1	3515892	3516768	877	*
1	3530033	3531810	1778	*
1	3542661	3543920	1260	*
1	3547211	3548780	1570	*
1	3554888	3555735	848	*
1	3610916	3611918	1003	*
1	3619019	3619459	441	*
1	3624197	3625911	1715	*
1	3649727	3650294	568	*
1	3651803	3653212	1410	*
1	3668667	3669392	726	*
1	3695603	3695975	373	*
1	3746802	3747632	831	*
1	3772078	3773294	1217	*
1	3775901	3776277	377	*
1	3795700	3797033	1334	*
1	3811312	3811750	439	*
1	3856567	3858028	1462	*
1	3869716	3870275	560	*
1	3899592	3901601	2010	*
1	3910759	3911341	583	*
1	4585263	4585558	296	*
1	4652579	4653095	517	*
1	5509725	5510220	496	*
1	5514543	5514889	347	*
1	5597985	5598485	501	*
1	5745777	5746327	551	*
1	5927904	5928523	620	*
1	5975190	5975660	471	*
1	5991626	5993521	1896	*
1	6025148	6026942	1795	*
1	6108855	6109533	679	*
1	6127507	6128337	831	*
1	6148325	6149035	711	*
1	6157343	6158287	945	*
1	6198918	6199882	965	*
1	6204995	6206959	1965	*
1	6235253	6236395	1143	*
1	6245025	6246194	1170	*
1	6246750	6247101	352	*
1	6259766	6260882	1117	*
1	6261014	6261540	527	*
1	6300199	6301069	871	*
1	6331372	6332088	717	*
1	6342002	6342490	489	*
1	6343317	6344099	783	*
1	6353752	6354477	726	*
1	6363064	6363627	564	*
1	6392653	6394242	1590	*
1	6404707	6404992	286	*
1	6414283	6414810	528	*
1	6419613	6420337	725	*
1	6423274	6423766	493	*
1	6427755	6428262	508	*
1	6437016	6437628	613	*
1	6440298	6440876	579	*
1	6448255	6449183	929	*
1	6464334	6465022	689	*
1	6475341	6476126	786	*
1	6489001	6489695	695	*
1	6489909	6491856	1948	*
1	6497345	6497885	541	*
1	6501892	6502646	755	*
1	6523594	6523978	385	*
1	6553639	6554814	1176	*
1	6579517	6580556	1040	*
1	6600856	6603753	2898	*
1	6612713	6614710	1998	*
1	6624637	6626029	1393	*
1	6634560	6635042	483	*
1	6701126	6702294	1169	*
1	6719876	6720338	463	*
1	6724516	6725181	666	*
1	6743595	6744206	612	*
1	6770638	6771238	601	*
1	6784202	6785585	1384	*
1	6795307	6796487	1181	*
1	6859831	6860828	998	*
1	6869210	6869956	747	*
1	6889901	6890336	436	*
1	6935124	6935676	553	*
1	6960299	6960861	563	*
1	6962340	6963933	1594	*
1	6991252	6991836	585	*
1	6998186	6998705	520	*
1	7070142	7070810	669	*
1	7117350	7118425	1076	*
1	7121571	7122154	584	*
1	7127654	7128378	725	*
1	7223417	7224342	926	*
1	7265697	7266469	773	*
1	7299235	7300031	797	*
1	7300821	7301808	988	*
1	7334434	7335948	1515	*
1	7341107	7342082	976	*
1	7379415	7379910	496	*
1	7388719	7390443	1725	*
1	7401732	7402522	791	*
1	7424349	7425113	765	*
1	7469081	7469988	908	*
1	7470563	7471727	1165	*
1	7477097	7477643	547	*
1	7478912	7479307	396	*
1	7482800	7483166	367	*
1	7519335	7519897	563	*
1	7526364	7526982	619	*
1	7538149	7538408	260	*
1	7539551	7540103	553	*
1	7549239	7550510	1272	*
1	7574170	7574957	788	*
1	7645345	7645906	562	*
1	7647058	7647605	548	*
1	7667478	7668118	641	*
1	7669463	7669848	386	*
1	7679938	7680787	850	*
1	7704399	7705001	603	*
1	7752527	7753163	637	*
1	7770833	7772055	1223	*
1	7783181	7784599	1419	*
1	7810356	7810789	434	*
1	7893658	7894872	1215	*
1	7902616	7903110	495	*
1	7953810	7954632	823	*
1	7961057	7962188	1132	*
1	7975122	7975673	552	*
1	8004397	8005699	1303	*
1	8017521	8017955	435	*
1	8020049	8020345	297	*
1	8025720	8026865	1146	*
1	8028005	8028584	580	*
1	8040426	8041251	826	*
1	8047631	8048477	847	*
1	8055939	8056414	476	*
1	8061216	8062033	818	*
1	8077143	8077588	446	*
1	8078125	8078724	600	*
1	8091540	8092102	563	*
1	8094493	8094866	374	*
1	8097271	8097866	596	*
1	8116571	8117270	700	*
1	8120976	8121940	965	*
1	8133141	8133602	462	*
1	8133653	8134473	821	*
1	8137609	8138197	589	*
1	8154652	8155066	415	*
1	8174197	8174737	541	*
1	8174828	8175216	389	*
1	8182066	8182970	905	*
1	8189943	8190237	295	*
1	8197576	8198343	768	*
1	8201304	8201776	473	*
1	8202126	8202844	719	*
1	8204240	8204821	582	*
1	8211684	8212538	855	*
1	8259084	8260226	1143	*
1	8293192	8293544	353	*
1	8314150	8314823	674	*
1	8317922	8318443	522	*
1	8343098	8344163	1066	*
1	8348832	8349329	498	*
1	8374812	8375145	334	*
1	8396865	8397336	472	*
1	8412190	8412828	639	*
1	8423263	8424843	1581	*
1	8438965	8439734	770	*
1	8525317	8526341	1025	*
1	8625934	8627122	1189	*
1	8661181	8662171	991	*
1	8701000	8701851	852	*
1	8702966	8703802	837	*
1	8712128	8713263	1136	*
1	8726809	8727163	355	*
1	8733313	8734033	721	*
1	8817095	8818256	1162	*
1	8822617	8823133	517	*
1	8848682	8849592	911	*
1	8873538	8873974	437	*
1	8877917	8879517	1601	*
1	8880126	8880496	371	*
1	8889233	8891014	1782	*
1	8903565	8904566	1002	*
1	8917937	8918653	717	*
1	8939452	8940018	567	*
1	8962763	8963432	670	*
1	8973937	8974385	449	*
1	8986121	8986706	586	*
1	9004891	9005449	559	*
1	9078582	9079274	693	*
1	9080521	9081284	764	*
1	9084765	9085436	672	*
1	9086089	9086532	444	*
1	9101423	9101924	502	*
1	9110475	9111363	889	*
1	9127908	9129988	2081	*
1	9145033	9145602	570	*
1	9162869	9164509	1641	*
1	9181095	9181823	729	*
1	9181936	9182974	1039	*
1	9201509	9202206	698	*
1	9234176	9235455	1280	*
1	9266918	9267627	710	*
1	9270391	9271006	616	*
1	9275519	9276017	499	*
1	9280375	9280962	588	*
1	9290055	9290839	785	*
1	9292468	9293390	923	*
1	9299974	9300679	706	*
1	9302762	9303540	779	*
1	9315472	9316498	1027	*
1	9317626	9318278	653	*
1	9321238	9321965	728	*
1	9350078	9351005	928	*
1	9376429	9377444	1016	*
1	9384573	9385324	752	*
1	9388477	9389229	753	*
1	9400441	9401006	566	*
1	9412930	9414070	1141	*
1	9428593	9429539	947	*
1	9438549	9439187	639	*
1	9455794	9456291	498	*
1	9472837	9473609	773	*
1	9491007	9491454	448	*
1	9494925	9495793	869	*
1	9539109	9540472	1364	*
1	9561380	9561957	578	*
1	9588336	9590113	1778	*
1	9615459	9615973	515	*
1	9626921	9627588	668	*
1	9687268	9688118	851	*
1	9688972	9689946	975	*
1	9702274	9702659	386	*
1	9718890	9719715	826	*
1	9724742	9725357	616	*
1	9792220	9792924	705	*
1	9798114	9798859	746	*
1	9822946	9824731	1786	*
1	9825069	9826007	939	*
1	9842642	9843949	1308	*
1	9867296	9868010	715	*
1	9874884	9875282	399	*
1	9890282	9890787	506	*
1	9909934	9911245	1312	*
1	9942488	9943824	1337	*
1	9950307	9950819	513	*
1	9960910	9961582	673	*
1	10032441	10033854	1414	*
1	10055699	10056107	409	*
1	10074336	10074744	409	*
1	10108062	10108807	746	*
1	10122818	10123474	657	*
1	10195610	10196025	416	*
1	10209784	10211973	2190	*
1	10338097	10338383	287	*
1	10339841	10340146	306	*
1	10377306	10377935	630	*
1	10387395	10388412	1018	*
1	10398370	10399971	1602	*
1	10415181	10415731	551	*
1	10430079	10431345	1267	*
1	10459044	10459590	547	*
1	10471820	10472818	999	*
1	10474729	10475637	909	*
1	10494496	10495376	881	*
1	10507299	10507819	521	*
1	10510467	10511172	706	*
1	10528025	10529431	1407	*
1	10575663	10576020	358	*
1	10599120	10599943	824	*
1	10634690	10635901	1212	*
1	10646385	10646699	315	*
1	10693802	10695298	1497	*
1	10727673	10728324	652	*
1	10731037	10731414	378	*
1	10755768	10756476	709	*
1	10779153	10779628	476	*
1	10788533	10789114	582	*
1	10795909	10796949	1041	*
1	10803909	10804865	957	*
1	10824795	10825271	477	*
1	10835853	10836426	574	*
1	10837197	10837760	564	*
1	10866651	10867665	1015	*
1	10900328	10901833	1506	*
1	10909935	10910466	532	*
1	10960818	10961532	715	*
1	10980067	10980522	456	*
1	10990110	10990662	553	*
1	11012109	11013430	1322	*
1	11037630	11038164	535	*
1	11059214	11060600	1387	*
1	11099111	11100231	1121	*
1	11134030	11135214	1185	*
1	11158651	11159209	559	*
1	11178047	11178996	950	*
1	11180128	11180862	735	*
1	11241719	11242209	491	*
1	11262043	11263021	979	*
1	11272686	11274081	1396	*
1	11281478	11282601	1124	*
1	11292519	11293241	723	*
1	11293844	11294222	379	*
1	11337519	11337834	316	*
1	11478552	11479548	997	*
1	11645723	11646215	493	*
1	11653124	11653731	608	*
1	11654283	11655203	921	*
1	11663814	11664687	874	*
1	11680485	11681897	1413	*
1	11692953	11693718	766	*
1	11733317	11733754	438	*
1	11735675	11737390	1716	*
1	11748934	11749690	757	*
1	11784951	11785664	714	*
1	11787352	11788086	735	*
1	11790748	11791519	772	*
1	11803091	11803899	809	*
1	11805069	11806549	1481	*
1	11821344	11822121	778	*
1	11838122	11839010	889	*
1	11893786	11894285	500	*
1	11901440	11901903	464	*
1	11908092	11909930	1839	*
1	11918677	11919528	852	*
1	11926240	11926709	470	*
1	11934201	11935236	1036	*
1	11939004	11939643	640	*
1	11940561	11940973	413	*
1	11966748	11967543	796	*
1	11979556	11980782	1227	*
1	12001880	12002583	704	*
1	12018986	12020433	1448	*
1	12030938	12031625	688	*
1	12040370	12041057	688	*
1	12044142	12044640	499	*
1	12051920	12052563	644	*
1	12075540	12076125	586	*
1	12132086	12132676	591	*
1	12132864	12133563	700	*
1	12135655	12135988	334	*
1	12143434	12144246	813	*
1	12153146	12153838	693	*
1	12161585	12162442	858	*
1	12166794	12167355	562	*
1	12208615	12209414	800	*
1	12229621	12231437	1817	*
1	12272035	12272433	399	*
1	12454476	12455477	1002	*
1	12477880	12478938	1059	*
1	12480773	12481150	378	*
1	12518731	12519678	948	*
1	12525406	12525873	468	*
1	12539802	12540838	1037	*
1	12541456	12541894	439	*
1	12548806	12550356	1551	*
1	12556346	12556919	574	*
1	12572576	12574531	1956	*
1	12579975	12580695	721	*
1	12588076	12588759	684	*
1	12595175	12596847	1673	*
1	12601905	12602490	586	*
1	12604164	12604748	585	*
1	12615940	12616884	945	*
1	12617929	12619583	1655	*
1	12636219	12637237	1019	*
1	12658924	12659403	480	*
1	12760330	12760791	462	*
1	12810702	12811211	510	*
1	13748792	13750091	1300	*
1	13766827	13767542	716	*
1	14055303	14056173	871	*
1	14095020	14095375	356	*
1	14108761	14109483	723	*
1	14113052	14113806	755	*
1	14140716	14141424	709	*
1	14142418	14142735	318	*
1	14174833	14175457	625	*
1	14190432	14190935	504	*
1	14254224	14254678	455	*
1	14259055	14259608	554	*
1	14278885	14279472	588	*
1	14282590	14283297	708	*
1	14291024	14291772	749	*
1	14304333	14304918	586	*
1	14320465	14320970	506	*
1	14332109	14332843	735	*
1	14339885	14340820	936	*
1	14345961	14346711	751	*
1	14360875	14361418	544	*
1	14366157	14366849	693	*
1	14390668	14391204	537	*
1	14413782	14414254	473	*
1	14486313	14487289	977	*
1	14517083	14518035	953	*
1	14522326	14523252	927	*
1	14553592	14554267	676	*
1	14598002	14598918	917	*
1	14625747	14626270	524	*
1	14653423	14654106	684	*
1	14731734	14732262	529	*
1	14742104	14742903	800	*
1	14765534	14766268	735	*
1	14810604	14811470	867	*
1	14814963	14815886	924	*
1	14822324	14822995	672	*
1	14826093	14826532	440	*
1	14894776	14895465	690	*
1	14910961	14911779	819	*
1	14923710	14925253	1544	*
1	14929501	14930221	721	*
1	14945156	14945991	836	*
1	14946877	14947602	726	*
1	14954051	14954610	560	*
1	14968229	14968992	764	*
1	14987897	14988606	710	*
1	14996003	14997071	1069	*
1	15003081	15003837	757	*
1	15014270	15014958	689	*
1	15027616	15028528	913	*
1	15046422	15047033	612	*
1	15089255	15089793	539	*
1	15090313	15090834	522	*
1	15128530	15128931	402	*
1	15152363	15154358	1996	*
1	15178740	15179543	804	*
1	15200363	15201081	719	*
1	15247007	15247767	761	*
1	15261247	15261799	553	*
1	15272360	15272905	546	*
1	15282856	15283213	358	*
1	15284566	15285430	865	*
1	15290294	15290843	550	*
1	15323164	15324236	1073	*
1	15337465	15338408	944	*
1	15352226	15352808	583	*
1	15356174	15357277	1104	*
1	15409331	15410735	1405	*
1	15415977	15416693	717	*
1	15426792	15427279	488	*
1	15459652	15460328	677	*
1	15501437	15501769	333	*
1	15523883	15525492	1610	*
1	15526392	15527312	921	*
1	15584363	15585411	1049	*
1	15603058	15603982	925	*
1	15616763	15618269	1507	*
1	15678590	15678959	370	*
1	15680749	15681563	815	*
1	15684122	15684431	310	*
1	15741172	15741947	776	*
1	15758562	15759653	1092	*
1	15786571	15787187	617	*
1	15788088	15788576	489	*
1	15795109	15795547	439	*
1	15796613	15797205	593	*
1	15799039	15799849	811	*
1	15799886	15801457	1572	*
1	15815400	15816038	639	*
1	15825377	15826164	788	*
1	15833142	15833626	485	*
1	15834304	15836428	2125	*
1	15847178	15848680	1503	*
1	15849289	15850297	1009	*
1	15865828	15866265	438	*
1	15885743	15886853	1111	*
1	15916455	15916958	504	*
1	15919322	15919693	372	*
1	15923307	15923631	325	*
1	15924614	15925163	550	*
1	15949105	15950349	1245	*
1	15952425	15953072	648	*
1	15975283	15976319	1037	*
1	15994532	15994913	382	*
1	16006932	16007468	537	*
1	16012653	16013753	1101	*
1	16032494	16033347	854	*
1	16038513	16038875	363	*
1	16048559	16049150	592	*
1	16055651	16056430	780	*
1	16075984	16077277	1294	*
1	16078980	16079426	447	*
1	16082356	16082852	497	*
1	16112828	16113480	653	*
1	16139305	16140160	856	*
1	16143746	16144323	578	*
1	16144961	16147244	2284	*
1	16155576	16156417	842	*
1	16164171	16164681	511	*
1	16167355	16168152	798	*
1	16173055	16173942	888	*
1	16175517	16176529	1013	*
1	16181606	16182580	975	*
1	16187637	16188218	582	*
1	16188996	16189357	362	*
1	16206186	16207327	1142	*
1	16217022	16218002	981	*
1	16236090	16237704	1615	*
1	16248651	16249092	442	*
1	16249890	16250252	363	*
1	16254334	16254934	601	*
1	16324296	16324884	589	*
1	16351875	16353096	1222	*
1	16366901	16368085	1185	*
1	16375357	16376294	938	*
1	16386106	16387320	1215	*
1	16440166	16441511	1346	*
1	16498706	16500220	1515	*
1	16513457	16514601	1145	*
1	16534280	16535743	1464	*
1	16612582	16614051	1470	*
1	16620846	16621424	579	*
1	16623903	16624508	606	*
1	16643734	16645220	1487	*
1	16677788	16678457	670	*
1	16707218	16708100	883	*
1	16727182	16728091	910	*
1	16872499	16873290	792	*
1	16888830	16889990	1161	*
1	16895398	16897012	1615	*
1	16903804	16905786	1983	*
1	16913440	16914684	1245	*
1	16948146	16949357	1212	*
1	16951659	16952027	369	*
1	16960569	16961267	699	*
1	16966847	16967907	1061	*
1	16971770	16972388	619	*
1	16980330	16981111	782	*
1	17003620	17004565	946	*
1	17010685	17012341	1657	*
1	17027417	17028244	828	*
1	17053701	17054662	962	*
1	17059496	17060180	685	*
1	17113685	17114367	683	*
1	17119276	17119685	410	*
1	17125742	17126281	540	*
1	17128274	17129043	770	*
1	17162678	17163301	624	*
1	17167993	17168866	874	*
1	17169332	17169693	362	*
1	17189930	17190669	740	*
1	17191224	17191733	510	*
1	17207684	17208461	778	*
1	17211961	17213169	1209	*
1	17226310	17226834	525	*
1	17232920	17234240	1321	*
1	17236855	17237606	752	*
1	17250435	17251282	848	*
1	17259160	17259673	514	*
1	17276480	17277158	679	*
1	17287304	17287851	548	*
1	17289646	17290308	663	*
1	17335902	17336410	509	*
1	17348059	17348745	687	*
1	17405994	17406661	668	*
1	17437746	17438786	1041	*
1	17439661	17440125	465	*
1	17460117	17460947	831	*
1	17475713	17476321	609	*
1	17477179	17477827	649	*
1	17494099	17494780	682	*
1	17502244	17502882	639	*
1	17531522	17532572	1051	*
1	17539567	17540976	1410	*
1	17551023	17551579	557	*
1	17551679	17552362	684	*
1	17561286	17562052	767	*
1	17563950	17564551	602	*
1	17564696	17564996	301	*
1	17569118	17570311	1194	*
1	17587617	17588830	1214	*
1	17606710	17607224	515	*
1	17624191	17625424	1234	*
1	17653591	17654249	659	*
1	17696408	17697001	594	*
1	17765476	17766407	932	*
1	17768492	17769330	839	*
1	17825927	17826572	646	*
1	17866441	17866888	448	*
1	17874112	17874842	731	*
1	18021998	18022696	699	*
1	18092054	18092426	373	*
1	18581435	18581742	308	*
1	18597246	18597764	519	*
1	18618387	18619062	676	*
1	18681399	18681708	310	*
1	18820617	18821167	551	*
1	18875024	18875761	738	*
1	18884133	18884503	371	*
1	18902032	18903308	1277	*
1	18912948	18913612	665	*
1	18922073	18922866	794	*
1	18926323	18926999	677	*
1	18941075	18942143	1069	*
1	18949487	18950292	806	*
1	18955522	18957329	1808	*
1	19009808	19011561	1754	*
1	19033890	19034558	669	*
1	19045297	19045801	505	*
1	19066243	19066676	434	*
1	19066880	19067821	942	*
1	19096268	19096568	301	*
1	19203279	19203800	522	*
1	19209551	19210959	1409	*
1	19251334	19252472	1139	*
1	19288452	19289466	1015	*
1	19311125	19312960	1836	*
1	19341495	19341992	498	*
1	19344392	19344719	328	*
1	19430171	19430700	530	*
1	19440432	19440908	477	*
1	19450626	19451373	748	*
1	19469439	19469914	476	*
1	19484332	19486305	1974	*
1	19596367	19597823	1457	*
1	19635687	19636148	462	*
1	19640377	19641129	753	*
1	19643151	19644603	1453	*
1	19650963	19651476	514	*
1	19653520	19654097	578	*
1	19659516	19660156	641	*
1	19676464	19676903	440	*
1	19704486	19705062	577	*
1	19715528	19716143	616	*
1	19754463	19754905	443	*
1	19758258	19758884	627	*
1	19765429	19766044	616	*
1	19799293	19800613	1321	*
1	19860988	19861619	632	*
1	19863797	19864346	550	*
1	19866763	19867256	494	*
1	19882051	19883168	1118	*
1	19918013	19918338	326	*
1	20100783	20101284	502	*
1	20124383	20124979	597	*
1	20152021	20152813	793	*
1	20195199	20195523	325	*
1	20212967	20213361	395	*
1	20216665	20216982	318	*
1	20279454	20279959	506	*
1	20358570	20359275	706	*
1	20411195	20411669	475	*
1	20440800	20441127	328	*
1	20476292	20476868	577	*
1	20485455	20486566	1112	*
1	20493765	20494221	457	*
1	20507379	20508501	1123	*
1	20522324	20522993	670	*
1	20575201	20576929	1729	*
1	20588595	20590063	1469	*
1	20601255	20602041	787	*
1	20604153	20604751	599	*
1	20612063	20612792	730	*
1	20613409	20614293	885	*
1	20633254	20635000	1747	*
1	20639870	20640567	698	*
1	20661153	20662077	925	*
1	20696288	20697428	1141	*
1	20717451	20718403	953	*
1	20732045	20733741	1697	*
1	20786086	20788269	2184	*
1	20847302	20848700	1399	*
1	20896663	20897337	675	*
1	21022135	21022921	787	*
1	21083050	21083665	616	*
1	21091082	21091469	388	*
1	21149457	21150432	976	*
1	21175693	21177434	1742	*
1	21194914	21195735	822	*
1	21231982	21232669	688	*
1	21255196	21255752	557	*
1	21261615	21263071	1457	*
1	21270247	21270565	319	*
1	21289662	21290761	1100	*
1	21294392	21294968	577	*
1	21302649	21303526	878	*
1	21308437	21309639	1203	*
1	21317016	21317880	865	*
1	21318614	21319082	469	*
1	21324104	21325127	1024	*
1	21331894	21332619	726	*
1	21335785	21336220	436	*
1	21337872	21339577	1706	*
1	21344684	21346053	1370	*
1	21355967	21356463	497	*
1	21368256	21369057	802	*
1	21370582	21370903	322	*
1	21379001	21379601	601	*
1	21439716	21440498	783	*
1	21490698	21491186	489	*
1	21508861	21509474	614	*
1	21537875	21538668	794	*
1	21574090	21575184	1095	*
1	21586664	21587590	927	*
1	21607498	21608300	803	*
1	21626821	21627407	587	*
1	21631883	21632531	649	*
1	21638458	21639349	892	*
1	21651291	21652066	776	*
1	21659130	21659698	569	*
1	21703338	21703951	614	*
1	21764384	21765583	1200	*
1	21782232	21784051	1820	*
1	21801125	21801461	337	*
1	21818709	21819048	340	*
1	21861954	21862556	603	*
1	21869545	21870478	934	*
1	21896728	21897139	412	*
1	21909260	21910420	1161	*
1	21920161	21921045	885	*
1	21927335	21927941	607	*
1	21930932	21931907	976	*
1	21935853	21936980	1128	*
1	21942886	21943468	583	*
1	21956477	21957399	923	*
1	21963787	21964350	564	*
1	22005189	22005939	751	*
1	22019000	22019527	528	*
1	22024986	22026336	1351	*
1	22039611	22040358	748	*
1	22052400	22053825	1426	*
1	22131793	22132935	1143	*
1	22142274	22142953	680	*
1	22143109	22143897	789	*
1	22275850	22276219	370	*
1	22317285	22317658	374	*
1	22332857	22333481	625	*
1	22341964	22342531	568	*
1	22388645	22389874	1230	*
1	22414079	22414846	768	*
1	22416582	22416915	334	*
1	22420331	22420939	609	*
1	22428627	22429434	808	*
1	22451601	22452927	1327	*
1	22600399	22601099	701	*
1	22641880	22642396	517	*
1	22674133	22674492	360	*
1	22689483	22689960	478	*
1	22704301	22704997	697	*
1	22739490	22740309	820	*
1	22750141	22750991	851	*
1	22780725	22781059	335	*
1	22831746	22832644	899	*
1	22870303	22871015	713	*
1	22930168	22930758	591	*
1	22969253	22969716	464	*
1	22976372	22976992	621	*
1	23010443	23011361	919	*
1	23019060	23020416	1357	*
1	23122334	23122772	439	*
1	23167329	23168343	1015	*
1	23168389	23169077	689	*
1	23177410	23178203	794	*
1	23188390	23189391	1002	*
1	23194399	23195272	874	*
1	23196675	23197429	755	*
1	23198231	23198761	531	*
1	23216721	23217918	1198	*
1	23224713	23225589	877	*
1	23273298	23273975	678	*
1	23282755	23283382	628	*
1	23343576	23345144	1569	*
1	23367569	23369988	2420	*
1	23402930	23403280	351	*
1	23403578	23404410	833	*
1	23411583	23412192	610	*
1	23423500	23425123	1624	*
1	23451626	23452628	1003	*
1	23478772	23479383	612	*
1	23483325	23484923	1599	*
1	23496926	23497744	819	*
1	23528181	23528949	769	*
1	23530553	23531792	1240	*
1	23539571	23540349	779	*
1	23544663	23545256	594	*
1	23554484	23555288	805	*
1	23555938	23557146	1209	*
1	23559105	23559814	710	*
1	23562103	23562665	563	*
1	23576602	23577927	1326	*
1	23585309	23586192	884	*
1	23586638	23587082	445	*
1	23591491	23592139	649	*
1	23593461	23594140	680	*
1	23619376	23620069	694	*
1	23634618	23635809	1192	*
1	23637393	23638013	621	*
1	23650965	23651730	766	*
1	23657694	23658027	334	*
1	23691448	23692403	956	*
1	23718500	23718875	376	*
1	23742978	23744242	1265	*
1	23751123	23751641	519	*
1	23771913	23772631	719	*
1	23777808	23778905	1098	*
1	23779730	23780352	623	*
1	23790085	23790550	466	*
1	23790738	23791481	744	*
1	23799367	23801237	1871	*
1	23809667	23810202	536	*
1	23824808	23825741	934	*
1	23838228	23839030	803	*
1	23854535	23854962	428	*
1	23867648	23868816	1169	*
1	23907630	23908344	715	*
1	23916815	23917177	363	*
1	23919841	23920550	710	*
1	23930863	23931468	606	*
1	23951486	23952257	772	*
1	23958944	23960250	1307	*
1	23979832	23981086	1255	*
1	24003300	24003941	642	*
1	24008532	24008882	351	*
1	24009248	24009810	563	*
1	24018555	24019352	798	*
1	24022482	24023198	717	*
1	24027946	24028423	478	*
1	24045838	24046833	996	*
1	24046930	24047487	558	*
1	24070800	24071369	570	*
1	24107827	24108194	368	*
1	24108655	24109302	648	*
1	24112442	24112898	457	*
1	24117633	24118137	505	*
1	24119713	24120739	1027	*
1	24142536	24143427	892	*
1	24149730	24150914	1185	*
1	24186994	24187858	865	*
1	24191960	24192257	298	*
1	24201889	24202496	608	*
1	24236230	24237224	995	*
1	24266220	24267260	1041	*
1	24283582	24284476	895	*
1	24289758	24290521	764	*
1	24294279	24295459	1181	*
1	24321577	24322698	1122	*
1	24352007	24352640	634	*
1	24362988	24363399	412	*
1	24364469	24365082	614	*
1	24365134	24365752	619	*
1	24391305	24391612	308	*
1	24391983	24392650	668	*
1	24413310	24413978	669	*
1	24415276	24416126	851	*
1	24443269	24443658	390	*
1	24502126	24503431	1306	*
1	24515460	24516171	712	*
1	24559036	24559756	721	*
1	24587207	24587546	340	*
1	24635164	24635554	391	*
1	24642428	24644209	1782	*
1	24683518	24684262	745	*
1	24688542	24689089	548	*
1	24705162	24706019	858	*
1	24713025	24713843	819	*
1	24744814	24746048	1235	*
1	24769946	24770581	636	*
1	24830681	24831043	363	*
1	24847744	24848816	1073	*
1	24862072	24862872	801	*
1	24929390	24930750	1361	*
1	24932199	24932634	436	*
1	24949285	24949726	442	*
1	25017397	25017997	601	*
1	25022107	25023281	1175	*
1	25031883	25032742	860	*
1	25101438	25101854	417	*
1	25231988	25232980	993	*
1	25233090	25233535	446	*
1	25239522	25240499	978	*
1	25246985	25248132	1148	*
1	25267731	25268341	611	*
1	25338074	25339042	969	*
1	25352204	25352587	384	*
1	25371495	25372279	785	*
1	25429905	25431498	1594	*
1	25506679	25507364	686	*
1	25543267	25544230	964	*
1	25544586	25545117	532	*
1	25549428	25550175	748	*
1	25556509	25557296	788	*
1	25568339	25569296	958	*
1	25608483	25608921	439	*
1	25615922	25617248	1327	*
1	25688388	25689230	843	*
1	25694909	25695489	581	*
1	25743319	25744526	1208	*
1	25796947	25797185	239	*
1	25799789	25800893	1105	*
1	25810529	25811299	771	*
1	25819510	25821150	1641	*
1	25858629	25859886	1258	*
1	25874844	25876246	1403	*
1	25890332	25890865	534	*
1	25892216	25892898	683	*
1	25895368	25895726	359	*
1	25905377	25907081	1705	*
1	25922644	25923463	820	*
1	25997634	25998752	1119	*
1	26034932	26036487	1556	*
1	26110719	26112651	1933	*
1	26123204	26123780	577	*
1	26145087	26145665	579	*
1	26161614	26162369	756	*
1	26169504	26170463	960	*
1	26177066	26177679	614	*
1	26218920	26219611	692	*
1	26233621	26234913	1293	*
1	26279594	26280693	1100	*
1	26284766	26285332	567	*
1	26306106	26307170	1065	*
1	26321048	26322002	955	*
1	26336112	26337016	905	*
1	26377922	26378883	962	*
1	26387307	26387748	442	*
1	26391477	26391887	411	*
1	26417036	26417456	421	*
1	26431877	26432787	911	*
1	26471414	26473330	1917	*
1	26500036	26501747	1712	*
1	26529422	26531626	2205	*
1	26620114	26621700	1587	*
1	26636501	26637280	780	*
1	26677329	26678054	726	*
1	26692223	26693375	1153	*
1	26695331	26696369	1039	*
1	26697872	26698500	629	*
1	26705528	26706351	824	*
1	26723250	26724036	787	*
1	26771330	26772309	980	*
1	26783997	26784394	398	*
1	26787531	26788720	1190	*
1	26799530	26800395	866	*
1	26826201	26827488	1288	*
1	26848707	26849869	1163	*
1	26853116	26853448	333	*
1	26862857	26863673	817	*
1	26863894	26865664	1771	*
1	26889549	26890691	1143	*
1	26899799	26900679	881	*
1	26907219	26907983	765	*
1	26921239	26922442	1204	*
1	26966825	26967434	610	*
1	26993210	26994435	1226	*
1	26997682	26998072	391	*
1	26999020	27000020	1001	*
1	27009418	27010280	863	*
1	27010845	27011392	548	*
1	27012698	27013441	744	*
1	27031289	27031941	653	*
1	27044494	27045087	594	*
1	27097417	27097731	315	*
1	27099039	27100153	1115	*
1	27102715	27103157	443	*
1	27111913	27112624	712	*
1	27122471	27123055	585	*
1	27154556	27155680	1125	*
1	27192055	27193095	1041	*
1	27197768	27198375	608	*
1	27233959	27235697	1739	*
1	27284533	27285063	531	*
1	27296724	27297201	478	*
1	27300617	27301277	661	*
1	27306850	27307455	606	*
1	27321850	27322774	925	*
1	27349193	27350301	1109	*
1	27365403	27367374	1972	*
1	27392135	27392962	828	*
1	27416548	27416998	451	*
1	27436529	27437061	533	*
1	27489623	27490944	1322	*
1	27528073	27529415	1343	*
1	27540131	27540918	788	*
1	27542293	27543242	950	*
1	27556765	27558357	1593	*
1	27568146	27569287	1142	*
1	27575175	27576288	1114	*
1	27589716	27590548	833	*
1	27590983	27591587	605	*
1	27601740	27602486	747	*
1	27603406	27604427	1022	*
1	27643905	27644229	325	*
1	27650582	27651208	627	*
1	27658816	27660350	1535	*
1	27663108	27663501	394	*
1	27671886	27672842	957	*
1	27686487	27687121	635	*
1	27725421	27726631	1211	*
1	27772713	27773977	1265	*
1	27817163	27817646	484	*
1	27830333	27831530	1198	*
1	27857916	27858783	868	*
1	27872185	27872989	805	*
1	27875143	27875683	541	*
1	27914086	27915061	976	*
1	27934771	27935358	588	*
1	27959361	27960463	1103	*
1	27968721	27969091	371	*
1	27979629	27980137	509	*
1	28087749	28089148	1400	*
1	28104889	28105527	639	*
1	28153131	28153533	403	*
1	28208893	28209250	358	*
1	28232411	28233167	757	*
1	28235587	28236698	1112	*
1	28247076	28247616	541	*
1	28248262	28249278	1017	*
1	28249420	28249816	397	*
1	28259121	28260662	1542	*
1	28296684	28297159	476	*
1	28313760	28314534	775	*
1	28328726	28329759	1034	*
1	28346032	28346697	666	*
1	28351542	28352441	900	*
1	28359665	28359984	320	*
1	28369353	28370639	1287	*
1	28391849	28392555	707	*
1	28409621	28410307	687	*
1	28416433	28416830	398	*
1	28417352	28418149	798	*
1	28437260	28438510	1251	*
1	28449919	28450500	582	*
1	28471498	28472097	600	*
1	28505578	28506713	1136	*
1	28517924	28519162	1239	*
1	28552546	28553996	1451	*
1	28581155	28582353	1199	*
1	28591814	28593169	1356	*
1	28594604	28595186	583	*
1	28601645	28602179	535	*
1	28642188	28643563	1376	*
1	28648023	28648449	427	*
1	28648519	28649457	939	*
1	28668162	28669748	1587	*
1	28736298	28738073	1776	*
1	28784918	28785841	924	*
1	28846032	28846590	559	*
1	28859867	28861143	1277	*
1	28865903	28866508	606	*
1	28877118	28877594	477	*
1	28882055	28882522	468	*
1	28884714	28885359	646	*
1	28886758	28888492	1735	*
1	28914048	28915539	1492	*
1	28972062	28972904	843	*
1	29122080	29123256	1177	*
1	29124193	29125093	901	*
1	29133636	29134572	937	*
1	29181067	29182353	1287	*
1	29197345	29197867	523	*
1	29202648	29203421	774	*
1	29230563	29231340	778	*
1	29236143	29236822	680	*
1	29239138	29239602	465	*
1	29245629	29246185	557	*
1	29257007	29257975	969	*
1	29271591	29272367	777	*
1	29282924	29283755	832	*
1	29513337	29513743	407	*
1	29569850	29570691	842	*
1	29584700	29585390	691	*
1	29640085	29640489	405	*
1	29649412	29650293	882	*
1	29697888	29698470	583	*
1	29703591	29703905	315	*
1	29706997	29707335	339	*
1	29708928	29710101	1174	*
1	29793034	29793513	480	*
1	29974331	29974793	463	*
1	30083744	30084455	712	*
1	30111501	30111813	313	*
1	30191144	30191805	662	*
1	30525859	30526510	652	*
1	30657447	30658212	766	*
1	30707951	30708467	517	*
1	30717902	30719690	1789	*
1	30778424	30778785	362	*
1	30779586	30779945	360	*
1	30782351	30782676	326	*
1	30801575	30802258	684	*
1	30807161	30807854	694	*
1	30816276	30816991	716	*
1	30823702	30824956	1255	*
1	30854150	30854483	334	*
1	30909909	30910401	493	*
1	30911204	30911733	530	*
1	30929241	30930084	844	*
1	30966694	30967295	602	*
1	31065039	31066202	1164	*
1	31111215	31111848	634	*
1	31135756	31136567	812	*
1	31154592	31155882	1291	*
1	31162527	31163149	623	*
1	31170522	31171499	978	*
1	31181462	31182761	1300	*
1	31238986	31240189	1204	*
1	31296371	31297744	1374	*
1	31372923	31374109	1187	*
1	31394474	31395286	813	*
1	31412929	31414192	1264	*
1	31422444	31423065	622	*
1	31482759	31484015	1257	*
1	31497529	31498000	472	*
1	31520712	31521358	647	*
1	31523748	31524152	405	*
1	31530861	31531857	997	*
1	31548623	31550180	1558	*
1	31573774	31574640	867	*
1	31575507	31576769	1263	*
1	31583747	31584591	845	*
1	31588541	31589233	693	*
1	31591759	31592145	387	*
1	31593873	31594497	625	*
1	31617936	31618478	543	*
1	31644297	31645482	1186	*
1	31666184	31667019	836	*
1	31669628	31670571	944	*
1	31689643	31690263	621	*
1	31700744	31702038	1295	*
1	31712480	31713117	638	*
1	31714533	31715876	1344	*
1	31736580	31737122	543	*
1	31745277	31746734	1458	*
1	31753736	31754389	654	*
1	31762557	31763263	707	*
1	31769476	31770428	953	*
1	31775460	31775988	529	*
1	31788162	31789733	1572	*
1	31798139	31799370	1232	*
1	31815839	31816278	440	*
1	31897238	31898278	1041	*
1	31937373	31938057	685	*
1	31938059	31938896	838	*
1	31939628	31940221	594	*
1	31944234	31945125	892	*
1	31954419	31955524	1106	*
1	31956009	31956449	441	*
1	31963957	31964675	719	*
1	31977682	31978164	483	*
1	32003582	32003857	276	*
1	32013225	32014989	1765	*
1	32062283	32063197	915	*
1	32066345	32066852	508	*
1	32072320	32073644	1325	*
1	32100913	32101793	881	*
1	32107611	32108903	1293	*
1	32133162	32133952	791	*
1	32179252	32180836	1585	*
1	32200201	32201220	1020	*
1	32205275	32206450	1176	*
1	32215426	32216165	740	*
1	32221856	32222927	1072	*
1	32235855	32236556	702	*
1	32240191	32241799	1609	*
1	32246799	32247341	543	*
1	32248016	32248694	679	*
1	32291639	32292882	1244	*
1	32335139	32336630	1492	*
1	32351085	32352410	1326	*
1	32393919	32395251	1333	*
1	32400817	32401500	684	*
1	32413741	32414337	597	*
1	32448334	32448875	542	*
1	32449104	32449465	362	*
1	32499933	32501276	1344	*
1	32520451	32521055	605	*
1	32539006	32540383	1378	*
1	32611938	32612772	835	*
1	32650215	32651804	1590	*
1	32701451	32704237	2787	*
1	32712169	32712706	538	*
1	32716417	32717201	785	*
1	32724553	32725833	1281	*
1	32741242	32741976	735	*
1	32742304	32743747	1444	*
1	32759273	32760646	1374	*
1	32761038	32761953	916	*
1	32769492	32770008	517	*
1	32772941	32773530	590	*
1	32775128	32776006	879	*
1	32789259	32789890	632	*
1	32795443	32796166	724	*
1	32816694	32818636	1943	*
1	32876495	32876984	490	*
1	32892712	32893788	1077	*
1	32901076	32901873	798	*
1	32933440	32934501	1062	*
1	32948787	32949260	474	*
1	32963666	32965179	1514	*
1	32981092	32981788	697	*
1	32988756	32989611	856	*
1	32992273	32993053	781	*
1	33007204	33007927	724	*
1	33036045	33037254	1210	*
1	33050159	33050867	709	*
1	33055100	33055908	809	*
1	33060406	33061343	938	*
1	33080805	33081643	839	*
1	33086220	33086902	683	*
1	33099125	33099969	845	*
1	33126909	33127689	781	*
1	33152833	33153583	751	*
1	33180563	33182321	1759	*
1	33220811	33221529	719	*
1	33244112	33244601	490	*
1	33255403	33256248	846	*
1	33256431	33257336	906	*
1	33295459	33295879	421	*
1	33298500	33299077	578	*
1	33306447	33307596	1150	*
1	33327635	33328306	672	*
1	33349104	33350677	1574	*
1	33367587	33368296	710	*
1	33430322	33431503	1182	*
1	33443443	33444163	721	*
1	33455682	33456196	515	*
1	33470483	33470848	366	*
1	33472215	33473007	793	*
1	33612868	33613238	371	*
1	33633075	33633715	641	*
1	34597761	34598237	477	*
1	34626176	34626909	734	*
1	34681509	34681844	336	*
1	34742486	34743156	671	*
1	34755264	34755628	365	*
1	34762631	34763887	1257	*
1	34781029	34782368	1340	*
1	34786449	34786833	385	*
1	34852636	34853286	651	*
1	34858822	34860250	1429	*
1	34865783	34866897	1115	*
1	34885474	34886080	607	*
1	34984009	34985745	1737	*
1	35031068	35032333	1266	*
1	35079026	35079982	957	*
1	35191870	35193734	1865	*
1	35202116	35202490	375	*
1	35268323	35269540	1218	*
1	35451016	35451396	381	*
1	35505810	35506621	812	*
1	35538332	35538849	518	*
1	35556803	35557984	1182	*
1	35564496	35565020	525	*
1	35568894	35569272	379	*
1	35573095	35573887	793	*
1	35640851	35642249	1399	*
1	35707442	35708488	1047	*
1	35717802	35719362	1561	*
1	35726699	35727398	700	*
1	35769155	35770436	1282	*
1	35807449	35809185	1737	*
1	35882815	35884188	1374	*
1	35930218	35931876	1659	*
1	36088427	36089888	1462	*
1	36097022	36097383	362	*
1	36099411	36100339	929	*
1	36133373	36134083	711	*
1	36148983	36150073	1091	*
1	36150491	36151267	777	*
1	36155514	36157387	1874	*
1	36160842	36161470	629	*
1	36187761	36188659	899	*
1	36203351	36204389	1039	*
1	36217685	36217964	280	*
1	36223704	36225304	1601	*
1	36248303	36249216	914	*
1	36266379	36266777	399	*
1	36285460	36285987	528	*
1	36299780	36300403	624	*
1	36305951	36307495	1545	*
1	36322995	36324101	1107	*
1	36342526	36343295	770	*
1	36350695	36351939	1245	*
1	36373596	36375110	1515	*
1	36385034	36387141	2108	*
1	36397180	36398194	1015	*
1	36408391	36409137	747	*
1	36420755	36421383	629	*
1	36450071	36451009	939	*
1	36463509	36464913	1405	*
1	36516371	36516861	491	*
1	36553689	36554338	650	*
1	36576046	36576469	424	*
1	36609153	36609583	431	*
1	36650407	36650821	415	*
1	36703677	36704086	410	*
1	37177281	37177622	342	*
1	37434158	37434856	699	*
1	37454675	37455602	928	*
1	37471347	37472248	902	*
1	37474281	37474757	477	*
1	37476492	37477437	946	*
1	37479624	37480163	540	*
1	37486939	37487704	766	*
1	37498969	37499672	704	*
1	37513897	37515344	1448	*
1	37534420	37534918	499	*
1	37553912	37554616	705	*
1	37595376	37596448	1073	*
1	37689997	37691040	1044	*
1	37691520	37692876	1357	*
1	37752646	37753485	840	*
1	37793573	37794630	1058	*
1	37807506	37809332	1827	*
1	37859002	37860455	1454	*
1	37931161	37932230	1070	*
1	37946108	37947263	1156	*
1	37989293	37990598	1306	*
1	37995724	37996859	1136	*
1	38000442	38001023	582	*
1	38005176	38005978	803	*
1	38012171	38013347	1177	*
1	38029957	38030526	570	*
1	38046686	38047790	1105	*
1	38064114	38064757	644	*
1	38088353	38088789	437	*
1	38114223	38114631	409	*
1	38138341	38139310	970	*
1	38221034	38221636	603	*
1	38246715	38247415	701	*
1	38589029	38589405	377	*
1	38786590	38786939	350	*
1	38835256	38835607	352	*
1	38858845	38860463	1619	*
1	38872721	38873973	1253	*
1	38941226	38942223	998	*
1	38973091	38973433	343	*
1	38990644	38992461	1818	*
1	39025859	39027220	1362	*
1	39081045	39082052	1008	*
1	39098344	39099155	812	*
1	39104919	39106625	1707	*
1	39127515	39127911	397	*
1	39130268	39130733	466	*
1	39159015	39159692	678	*
1	39167580	39168221	642	*
1	39178157	39179394	1238	*
1	39183583	39184370	788	*
1	39191685	39192730	1046	*
1	39204375	39205055	681	*
1	39258475	39259173	699	*
1	39378329	39378670	342	*
1	39387440	39387881	442	*
1	39391888	39392385	498	*
1	39395445	39395900	456	*
1	39398298	39399122	825	*
1	39408212	39409749	1538	*
1	39490918	39491975	1058	*
1	39539008	39539578	571	*
1	39559135	39559973	839	*
1	39575451	39576234	784	*
1	39576381	39577146	766	*
1	39605979	39606791	813	*
1	39609600	39610120	521	*
1	39632705	39633468	764	*
1	39639467	39640193	727	*
1	39653513	39654054	542	*
1	39691054	39691763	710	*
1	39701593	39702267	675	*
1	39738594	39739451	858	*
1	39788349	39789763	1415	*
1	39799031	39800244	1214	*
1	39816578	39817676	1099	*
1	39845508	39846299	792	*
1	39852168	39852855	688	*
1	39882773	39883898	1126	*
1	39892527	39893620	1094	*
1	39900819	39902601	1783	*
1	39919454	39919897	444	*
1	39934294	39934940	647	*
1	39954841	39956301	1461	*
1	39960377	39960852	476	*
1	39973458	39973820	363	*
1	40039431	40041114	1684	*
1	40078379	40079005	627	*
1	40084733	40085262	530	*
1	40096730	40097819	1090	*
1	40143824	40144440	617	*
1	40160989	40162077	1089	*
1	40257363	40258702	1340	*
1	40267708	40268294	587	*
1	40315235	40317074	1840	*
1	40338458	40339106	649	*
1	40373378	40374994	1617	*
1	40379810	40380394	585	*
1	40438424	40438776	353	*
1	40449716	40451201	1486	*
1	40476897	40478088	1192	*
1	40508323	40509411	1089	*
1	40531224	40532175	952	*
1	40583335	40583804	470	*
1	40592215	40592518	304	*
1	40612295	40612954	660	*
1	40630565	40630862	298	*
1	40665296	40666107	812	*
1	40668836	40669211	376	*
1	40691388	40692853	1466	*
1	40703274	40703970	697	*
1	40711344	40712100	757	*
1	40774029	40774611	583	*
1	40783178	40783959	782	*
1	40802174	40802839	666	*
1	40848510	40848881	372	*
1	40849793	40850364	572	*
1	40861337	40862929	1593	*
1	40875685	40876132	448	*
1	40877627	40878271	645	*
1	40897459	40897912	454	*
1	40898406	40899023	618	*
1	40901837	40902507	671	*
1	40944307	40944785	479	*
1	40952304	40953013	710	*
1	40967374	40968618	1245	*
1	40979274	40980638	1365	*
1	41003312	41004133	822	*
1	41102014	41102935	922	*
1	41109306	41110359	1054	*
1	41123102	41123808	707	*
1	41152320	41153265	946	*
1	41241199	41242794	1596	*
1	41268097	41268686	590	*
1	41282708	41283227	520	*
1	41322867	41323282	416	*
1	41360854	41362171	1318	*
1	41371790	41372633	844	*
1	41381107	41383752	2646	*
1	41387699	41388048	350	*
1	41414882	41415291	410	*
1	41418820	41419463	644	*
1	41423438	41424336	899	*
1	41432286	41433513	1228	*
1	41442485	41443243	759	*
1	41455654	41456324	671	*
1	41474442	41475360	919	*
1	41476695	41477389	695	*
1	41482239	41483538	1300	*
1	41484246	41485193	948	*
1	41493072	41493672	601	*
1	41496121	41496726	606	*
1	41498546	41499278	733	*
1	41501536	41502155	620	*
1	41514424	41514744	321	*
1	41515767	41516728	962	*
1	41537717	41538376	660	*
1	41573892	41574673	782	*
1	41618018	41618489	472	*
1	41626046	41626755	710	*
1	41626944	41627351	408	*
1	41629629	41630028	400	*
1	41649983	41650480	498	*
1	41661421	41663337	1917	*
1	41672117	41672813	697	*
1	41712665	41713242	578	*
1	41713651	41714349	699	*
1	41783009	41783710	702	*
1	41812033	41812984	952	*
1	41823324	41823924	601	*
1	41862238	41863429	1192	*
1	41870065	41870597	533	*
1	41900559	41901194	636	*
1	41901794	41902589	796	*
1	41917878	41918446	569	*
1	41954463	41955025	563	*
1	41955451	41956166	716	*
1	42003401	42003835	435	*
1	42035156	42036298	1143	*
1	42146862	42147290	429	*
1	42165413	42166381	969	*
1	42176986	42177270	285	*
1	42214388	42215111	724	*
1	42334228	42335975	1748	*
1	42344325	42344642	318	*
1	42380222	42381228	1007	*
1	42420835	42421473	639	*
1	42455872	42457244	1373	*
1	42462786	42463647	862	*
1	42657941	42659265	1325	*
1	42681711	42683375	1665	*
1	42756845	42757348	504	*
1	42765845	42767804	1960	*
1	42816301	42817687	1387	*
1	42846063	42847346	1284	*
1	42922989	42923340	352	*
1	42923865	42925153	1289	*
1	42936072	42937580	1509	*
1	42940894	42941481	588	*
1	42941654	42942187	534	*
1	42943117	42943748	632	*
1	42957749	42959481	1733	*
1	42962612	42963006	395	*
1	42967082	42967646	565	*
1	43008159	43009021	863	*
1	43048689	43049398	710	*
1	43073475	43074058	584	*
1	43119913	43120577	665	*
1	43147454	43148088	635	*
1	43171750	43172878	1129	*
1	43206536	43207809	1274	*
1	43227088	43227671	584	*
1	43238127	43238449	323	*
1	43256610	43257172	563	*
1	43293653	43295026	1374	*
1	43348476	43350272	1797	*
1	43358091	43359519	1429	*
1	43366762	43368628	1867	*
1	43373101	43373815	715	*
1	43389355	43390266	912	*
1	43414442	43415133	692	*
1	43452795	43454201	1407	*
1	43454425	43454808	384	*
1	43472462	43473185	724	*
1	43523120	43523491	372	*
1	43529247	43529506	260	*
1	43530540	43532142	1603	*
1	43554475	43554745	271	*
1	43582089	43582800	712	*
1	43649501	43651088	1588	*
1	43706595	43708206	1612	*
1	43763305	43764038	734	*
1	43774432	43774716	285	*
1	43776459	43776808	350	*
1	43783219	43784254	1036	*
1	43821901	43822688	788	*
1	43834930	43835831	902	*
1	43836381	43836980	600	*
1	43853109	43853956	848	*
1	43858105	43859002	898	*
1	43884968	43885915	948	*
1	43933313	43935119	1807	*
1	43946171	43947741	1571	*
1	43969602	43970335	734	*
1	43974246	43975334	1089	*
1	43979467	43980367	901	*
1	43990981	43992245	1265	*
1	44005515	44006235	721	*
1	44029677	44031873	2197	*
1	44035915	44036909	995	*
1	44047720	44048546	827	*
1	44048852	44050487	1636	*
1	44089628	44090079	452	*
1	44101052	44101954	903	*
1	44154676	44155608	933	*
1	44213171	44213904	734	*
1	44217751	44218281	531	*
1	44293691	44294351	661	*
1	44325920	44326742	823	*
1	44327564	44328640	1077	*
1	44354778	44355787	1010	*
1	44377987	44378600	614	*
1	44389862	44390906	1045	*
1	44404985	44406942	1958	*
1	44423337	44424365	1029	*
1	44485107	44486412	1306	*
1	44531847	44532768	922	*
1	44553760	44554278	519	*
1	44594915	44595690	776	*
1	44631403	44632819	1417	*
1	44652687	44653217	531	*
1	44655519	44655869	351	*
1	44673738	44675027	1290	*
1	44707156	44707512	357	*
1	44714962	44715351	390	*
1	44720899	44722324	1426	*
1	44730448	44731519	1072	*
1	44738152	44738955	804	*
1	44739343	44740325	983	*
1	44775082	44776248	1167	*
1	44786117	44786892	776	*
1	44793317	44794177	861	*
1	44799679	44801058	1380	*
1	44806987	44808821	1835	*
1	44819205	44820748	1544	*
1	44835806	44836246	441	*
1	44842753	44843626	874	*
1	44924782	44925430	649	*
1	44947041	44947875	835	*
1	44968058	44968736	679	*
1	44985742	44986941	1200	*
1	45010555	45011518	964	*
1	45011803	45013071	1269	*
1	45018649	45019228	580	*
1	45172006	45172349	344	*
1	45179681	45180583	903	*
1	45198080	45198664	585	*
1	45205571	45206988	1418	*
1	45266024	45267196	1173	*
1	45303273	45304451	1179	*
1	45326565	45328373	1809	*
1	45329425	45329879	455	*
1	45339538	45341130	1593	*
1	45393585	45394472	888	*
1	45410779	45411950	1172	*
1	45442040	45442685	646	*
1	45490546	45491703	1158	*
1	45499549	45500683	1135	*
1	45507872	45509190	1319	*
1	45521246	45522650	1405	*
1	45522708	45523083	376	*
1	45550406	45551470	1065	*
1	45569844	45570591	748	*
1	45583242	45585217	1976	*
1	45590245	45590604	360	*
1	45686092	45687639	1548	*
1	45750128	45751146	1019	*
1	45802655	45804543	1889	*
1	45881448	45882077	630	*
1	45891952	45892821	870	*
1	45954032	45954897	866	*
1	46036898	46037572	675	*
1	46103055	46103483	429	*
1	46132340	46133691	1352	*
1	46171175	46172117	943	*
1	46174339	46175191	853	*
1	46179534	46179845	312	*
1	46183034	46183867	834	*
1	46197852	46199011	1160	*
1	46223267	46224039	773	*
1	46246920	46248602	1683	*
1	46301437	46303446	2010	*
1	46303520	46303956	437	*
1	46333520	46333999	480	*
1	46339591	46341394	1804	*
1	46347889	46348511	623	*
1	46401927	46402588	662	*
1	46406143	46406988	846	*
1	46442256	46443232	977	*
1	46446852	46447178	327	*
1	46477422	46477785	364	*
1	46489245	46490218	974	*
1	46516670	46517565	896	*
1	46520069	46521024	956	*
1	46522151	46522907	757	*
1	46527861	46528394	534	*
1	46532882	46533700	819	*
1	46547905	46548381	477	*
1	46603555	46604597	1043	*
1	46616094	46617329	1236	*
1	46622290	46622810	521	*
1	46643167	46643908	742	*
1	46667552	46668801	1250	*
1	46718572	46719657	1086	*
1	46725056	46725606	551	*
1	46747696	46748052	357	*
1	47012979	47013934	956	*
1	47030408	47031698	1291	*
1	47069057	47069780	724	*
1	47175374	47175598	225	*
1	47179053	47179805	753	*
1	47189898	47190735	838	*
1	47253883	47254434	552	*
1	47313397	47314605	1209	*
1	47333289	47334937	1649	*
1	47388705	47389246	542	*
1	47424269	47424940	672	*
1	47436477	47438498	2022	*
1	47449918	47450439	522	*
1	47487825	47488287	463	*
1	47507892	47508890	999	*
1	47521101	47521886	786	*
1	47527700	47528016	317	*
1	47534057	47534848	792	*
1	47569648	47570247	600	*
1	47650225	47650692	468	*
1	47684629	47685565	937	*
1	47709380	47711014	1635	*
1	47726040	47726610	571	*
1	47738438	47739338	901	*
1	47758221	47759419	1199	*
1	47763558	47764216	659	*
1	47797559	47798078	520	*
1	47809234	47809910	677	*
1	47871627	47872455	829	*
1	47894552	47895390	839	*
1	47905869	47906975	1107	*
1	47914149	47915001	853	*
1	47926372	47927102	731	*
1	47934081	47935196	1116	*
1	47941684	47942570	887	*
1	47992674	47993204	531	*
1	47996402	47997978	1577	*
1	48006944	48007633	690	*
1	48019610	48020347	738	*
1	48026248	48026688	441	*
1	48052177	48053016	840	*
1	48069412	48070847	1436	*
1	48077678	48078382	705	*
1	48080684	48081107	424	*
1	48082242	48083030	789	*
1	48093621	48094499	879	*
1	48109406	48109944	539	*
1	48114643	48115627	985	*
1	48186335	48186803	469	*
1	48201894	48202647	754	*
1	48369069	48369974	906	*
1	48471666	48472716	1051	*
1	48494273	48494813	541	*
1	48498114	48498422	309	*
1	48530669	48531128	460	*
1	48572673	48573165	493	*
1	48677355	48677720	366	*
1	48741392	48741920	529	*
1	48817563	48817912	350	*
1	48852861	48853586	726	*
1	48859159	48859813	655	*
1	48876255	48876671	417	*
1	48878214	48879043	830	*
1	48916066	48916808	743	*
1	48931344	48932287	944	*
1	49257165	49257923	759	*
1	50332847	50333918	1072	*
1	50348548	50349218	671	*
1	50368292	50368964	673	*
1	50423325	50424092	768	*
1	50605530	50605828	299	*
1	50873377	50874085	709	*
1	50959250	50960830	1581	*
1	50968051	50970366	2316	*
1	50976411	50978568	2158	*
1	50985018	50985649	632	*
1	51063148	51063784	637	*
1	51071899	51072531	633	*
1	51235779	51237241	1463	*
1	51261221	51261822	602	*
1	51264390	51264924	535	*
1	51296451	51297390	940	*
1	51313918	51314831	914	*
1	51331184	51331780	597	*
1	51344706	51345254	549	*
1	51422043	51422324	282	*
1	51517957	51519658	1702	*
1	51558075	51558989	915	*
1	51567437	51568223	787	*
1	51569467	51570260	794	*
1	51616858	51617863	1006	*
1	51622442	51622801	360	*
1	51636958	51637520	563	*
1	51642480	51643195	716	*
1	51648236	51648852	617	*
1	51660655	51661648	994	*
1	51671529	51672397	869	*
1	51699180	51699939	760	*
1	51729145	51730300	1156	*
1	51736736	51737176	441	*
1	51877985	51879385	1401	*
1	51896898	51897194	297	*
1	51897333	51898031	699	*
1	51898083	51898627	545	*
1	51990279	51991011	733	*
1	52002147	52002664	518	*
1	52032398	52034018	1621	*
1	52054850	52055788	939	*
1	52056011	52057013	1003	*
1	52127307	52127908	602	*
1	52141681	52143107	1427	*
1	52159394	52159746	353	*
1	52176453	52177282	830	*
1	52296198	52296635	438	*
1	52365086	52366658	1573	*
1	52368395	52368695	301	*
1	52403602	52405140	1539	*
1	52552179	52553933	1755	*
1	52574491	52575316	826	*
1	52602200	52602791	592	*
1	52632872	52633558	687	*
1	52662528	52663285	758	*
1	52697584	52698842	1259	*
1	52702919	52703748	830	*
1	52708276	52708847	572	*
1	52726080	52727466	1387	*
1	52833409	52834196	788	*
1	52842394	52844271	1878	*
1	52921086	52922097	1012	*
1	52926968	52928302	1335	*
1	53014673	53015112	440	*
1	53015193	53015717	525	*
1	53135193	53136164	972	*
1	53145719	53146803	1085	*
1	53172661	53173196	536	*
1	53185540	53186048	509	*
1	53196245	53197828	1584	*
1	53220070	53221020	951	*
1	53238143	53239100	958	*
1	53292953	53293536	584	*
1	53325714	53327668	1955	*
1	53327756	53328511	756	*
1	53381765	53382379	615	*
1	53393324	53393871	548	*
1	53413012	53414068	1057	*
1	53444605	53445121	517	*
1	53448668	53449469	802	*
1	53470034	53470521	488	*
1	53477455	53478032	578	*
1	53485448	53486022	575	*
1	53509294	53509679	386	*
1	53512078	53513026	949	*
1	53541815	53542931	1117	*
1	53572238	53573064	827	*
1	53582136	53582712	577	*
1	53625824	53626510	687	*
1	53639096	53639903	808	*
1	53685077	53686063	987	*
1	53697843	53698667	825	*
1	53732904	53733747	844	*
1	53738799	53739687	889	*
1	53754702	53755046	345	*
1	53811156	53811953	798	*
1	53837652	53838786	1135	*
1	53860854	53861436	583	*
1	53889325	53890354	1030	*
1	53945262	53946788	1527	*
1	53956944	53957691	748	*
1	53991898	53992666	769	*
1	54016352	54016920	569	*
1	54052277	54054114	1838	*
1	54069870	54070444	575	*
1	54081640	54082020	381	*
1	54121099	54122070	972	*
1	54153764	54154316	553	*
1	54157899	54158547	649	*
1	54181719	54182035	317	*
1	54199542	54200889	1348	*
1	54227027	54227798	772	*
1	54229135	54229963	829	*
1	54249833	54250156	324	*
1	54253435	54254028	594	*
1	54272871	54274227	1357	*
1	54287000	54287970	971	*
1	54298953	54299454	502	*
1	54335512	54336158	647	*
1	54397096	54397573	478	*
1	54406158	54407166	1009	*
1	54421052	54421583	532	*
1	54459504	54460153	650	*
1	54487947	54488683	737	*
1	54488948	54489760	813	*
1	54498953	54500302	1350	*
1	54541817	54543092	1276	*
1	54581385	54582202	818	*
1	54672022	54672410	389	*
1	54715332	54716532	1201	*
1	54763957	54765154	1198	*
1	54801177	54801836	660	*
1	54810315	54810981	667	*
1	54850758	54851175	418	*
1	54856259	54857002	744	*
1	54860948	54861673	726	*
1	54886400	54887990	1591	*
1	54904242	54905072	831	*
1	54934759	54935339	581	*
1	54945136	54945966	831	*
1	54950146	54951038	893	*
1	54955394	54955875	482	*
1	54971140	54971852	713	*
1	54980464	54980965	502	*
1	54996250	54996744	495	*
1	55021837	55022632	796	*
1	55039090	55040863	1774	*
1	55071456	55071872	417	*
1	55140535	55140956	422	*
1	55214264	55215947	1684	*
1	55277245	55277891	647	*
1	55284743	55285313	571	*
1	55310473	55311301	829	*
1	55321799	55322479	681	*
1	55362574	55363099	526	*
1	55374886	55375893	1008	*
1	55399380	55399783	404	*
1	55428841	55429858	1018	*
1	55430761	55431096	336	*
1	55443273	55443964	692	*
1	55472585	55473218	634	*
1	55503688	55505028	1341	*
1	55506684	55507553	870	*
1	55542759	55543706	948	*
1	55559796	55560370	575	*
1	55572764	55573547	784	*
1	55580924	55581321	398	*
1	55584714	55585590	877	*
1	55631680	55632639	960	*
1	55632831	55633283	453	*
1	55670448	55671199	752	*
1	55694064	55694979	916	*
1	55700199	55701265	1067	*
1	55718602	55719583	982	*
1	55726778	55727540	763	*
1	55750218	55750998	781	*
1	55781678	55782636	959	*
1	55812278	55812879	602	*
1	55813550	55814208	659	*
1	55827258	55827716	459	*
1	55970668	55971306	639	*
1	55974690	55975717	1028	*
1	56073733	56074671	939	*
[truncated: 58,172 more rows]

## Sheet: 1h Hpx siHIF1b
seqnames	start	end	width	strand
1	778296	779334	1039	*
1	827103	827873	771	*
1	869581	870271	691	*
1	904312	904971	660	*
1	906736	907249	514	*
1	910581	911559	979	*
1	920425	921408	984	*
1	925542	925969	428	*
1	938137	938757	621	*
1	941601	942130	530	*
1	943105	943500	396	*
1	959102	959762	661	*
1	960374	961401	1028	*
1	965970	967412	1443	*
1	975882	976694	813	*
1	999812	1000949	1138	*
1	1001508	1002133	626	*
1	1013159	1014677	1519	*
1	1019279	1020448	1170	*
1	1021092	1021771	680	*
1	1024572	1025481	910	*
1	1058811	1059981	1171	*
1	1063745	1064568	824	*
1	1073774	1074671	898	*
1	1079376	1080613	1238	*
1	1115754	1116838	1085	*
1	1121710	1122593	884	*
1	1133381	1133832	452	*
1	1157365	1158577	1213	*
1	1208025	1208732	708	*
1	1230712	1231015	304	*
1	1231120	1232547	1428	*
1	1244018	1244707	690	*
1	1258623	1258985	363	*
1	1264760	1265613	854	*
1	1273314	1274813	1500	*
1	1281431	1282470	1040	*
1	1290959	1292176	1218	*
1	1304753	1305953	1201	*
1	1307913	1308785	873	*
1	1318264	1318654	391	*
1	1324264	1325763	1500	*
1	1330642	1331629	988	*
1	1344661	1346388	1728	*
1	1347671	1348353	683	*
1	1360247	1360997	751	*
1	1374644	1375728	1085	*
1	1398895	1400733	1839	*
1	1406741	1408020	1280	*
1	1431841	1432241	401	*
1	1440771	1441446	676	*
1	1470910	1472147	1238	*
1	1504724	1505966	1243	*
1	1511398	1512489	1092	*
1	1554532	1555226	695	*
1	1574007	1575502	1496	*
1	1599556	1599995	440	*
1	1615034	1616780	1747	*
1	1627212	1628994	1783	*
1	1658662	1659560	899	*
1	1686180	1687024	845	*
1	1692286	1693349	1064	*
1	1723977	1724854	878	*
1	1740951	1741523	573	*
1	1746204	1746762	559	*
1	1758599	1759748	1150	*
1	1777588	1779273	1686	*
1	1782574	1783306	733	*
1	1858994	1859704	711	*
1	1890646	1892028	1383	*
1	1894497	1894897	401	*
1	1906247	1907860	1614	*
1	1908479	1909509	1031	*
1	1918868	1920013	1146	*
1	1943820	1944492	673	*
1	1959765	1960572	808	*
1	1968890	1969747	858	*
1	2003428	2004190	763	*
1	2015073	2015518	446	*
1	2044798	2045201	404	*
1	2049537	2050954	1418	*
1	2104309	2105547	1239	*
1	2132922	2133974	1053	*
1	2139826	2140460	635	*
1	2174123	2174780	658	*
1	2189327	2190633	1307	*
1	2194626	2195710	1085	*
1	2199119	2199777	659	*
1	2205180	2205603	424	*
1	2207142	2208923	1782	*
1	2212440	2213515	1076	*
1	2227474	2228109	636	*
1	2231673	2232159	487	*
1	2234238	2235033	796	*
1	2311411	2312047	637	*
1	2322236	2322972	737	*
1	2330763	2331428	666	*
1	2360588	2361545	958	*
1	2372663	2373240	578	*
1	2381509	2382476	968	*
1	2391021	2392263	1243	*
1	2412024	2413565	1542	*
1	2801487	2802314	828	*
1	2821772	2822439	668	*
1	2922060	2922387	328	*
1	3312940	3313699	760	*
1	3319839	3320454	616	*
1	3410196	3410559	364	*
1	3424696	3425059	364	*
1	3453134	3453771	638	*
1	3453777	3455167	1391	*
1	3471185	3472115	931	*
1	3473485	3473993	509	*
1	3481831	3482847	1017	*
1	3491219	3492051	833	*
1	3503835	3505159	1325	*
1	3509925	3510943	1019	*
1	3515897	3516757	861	*
1	3530031	3530736	706	*
1	3530778	3532042	1265	*
1	3542760	3543926	1167	*
1	3547227	3548780	1554	*
1	3554806	3555650	845	*
1	3611191	3611914	724	*
1	3618837	3619386	550	*
1	3624175	3625878	1704	*
1	3649607	3650324	718	*
1	3651952	3653194	1243	*
1	3668669	3669423	755	*
1	3695630	3695980	351	*
1	3746790	3747632	843	*
1	3772077	3773279	1203	*
1	3775939	3776278	340	*
1	3795707	3796990	1284	*
1	3811303	3811745	443	*
1	3856587	3858064	1478	*
1	3869621	3870246	626	*
1	3899637	3901638	2002	*
1	3910644	3911286	643	*
1	4585245	4585556	312	*
1	4652572	4653096	525	*
1	5509897	5510238	342	*
1	5514586	5514894	309	*
1	5597995	5598784	790	*
1	5717559	5718175	617	*
1	5745685	5746322	638	*
1	5927876	5928586	711	*
1	5975092	5975649	558	*
1	5991539	5993534	1996	*
1	6001995	6002540	546	*
1	6025186	6026691	1506	*
1	6108862	6109526	665	*
1	6111637	6112058	422	*
1	6127513	6128323	811	*
1	6148399	6149053	655	*
1	6157402	6158246	845	*
1	6198880	6200141	1262	*
1	6204990	6206956	1967	*
1	6235259	6236389	1131	*
1	6245005	6246179	1175	*
1	6259639	6261567	1929	*
1	6300149	6301022	874	*
1	6331319	6332069	751	*
1	6341960	6342488	529	*
1	6343301	6344145	845	*
1	6353789	6354497	709	*
1	6363078	6363588	511	*
1	6392615	6394253	1639	*
1	6414226	6414836	611	*
1	6419609	6420347	739	*
1	6422816	6423148	333	*
1	6427525	6428269	745	*
1	6437021	6437595	575	*
1	6440196	6440853	658	*
1	6448202	6449351	1150	*
1	6464413	6464945	533	*
1	6475365	6476120	756	*
1	6489004	6489606	603	*
1	6489902	6491896	1995	*
1	6497301	6497905	605	*
1	6501909	6502631	723	*
1	6523592	6523966	375	*
1	6553808	6554815	1008	*
1	6578137	6578545	409	*
1	6579504	6581196	1693	*
1	6600889	6603752	2864	*
1	6612715	6614592	1878	*
1	6624628	6626036	1409	*
1	6634627	6635048	422	*
1	6701189	6702283	1095	*
1	6724502	6725106	605	*
1	6743578	6744193	616	*
1	6770621	6771088	468	*
1	6784205	6785570	1366	*
1	6795366	6796446	1081	*
1	6859742	6860843	1102	*
1	6869156	6869953	798	*
1	6889919	6890430	512	*
1	6935095	6935669	575	*
1	6960297	6960864	568	*
1	6962348	6963913	1566	*
1	6991270	6991664	395	*
1	6998229	6998705	477	*
1	7070118	7070854	737	*
1	7117378	7118430	1053	*
1	7121506	7122185	680	*
1	7127451	7128393	943	*
1	7136024	7137047	1024	*
1	7149450	7149912	463	*
1	7223434	7224289	856	*
1	7265678	7266718	1041	*
1	7299224	7300350	1127	*
1	7300856	7301742	887	*
1	7317919	7318328	410	*
1	7334438	7335947	1510	*
1	7341131	7342077	947	*
1	7378879	7379882	1004	*
1	7388737	7390469	1733	*
1	7401743	7402552	810	*
1	7424355	7425170	816	*
1	7469160	7469998	839	*
1	7470699	7472021	1323	*
1	7477094	7477657	564	*
1	7478885	7479321	437	*
1	7482787	7483247	461	*
1	7526375	7526970	596	*
1	7538095	7538393	299	*
1	7539510	7540117	608	*
1	7549196	7550522	1327	*
1	7574173	7574855	683	*
1	7645262	7645905	644	*
1	7647261	7647614	354	*
1	7667506	7668112	607	*
1	7680060	7680965	906	*
1	7704387	7704999	613	*
1	7752469	7753170	702	*
1	7770826	7772010	1185	*
1	7783176	7784647	1472	*
1	7810409	7810780	372	*
1	7869316	7870036	721	*
1	7893660	7894881	1222	*
1	7902611	7903122	512	*
1	7953798	7954658	861	*
1	7961055	7962260	1206	*
1	7975118	7975679	562	*
1	8004407	8005681	1275	*
1	8017512	8018076	565	*
1	8020069	8020382	314	*
1	8025604	8026920	1317	*
1	8027988	8028580	593	*
1	8040433	8041292	860	*
1	8045928	8046738	811	*
1	8047627	8048491	865	*
1	8055903	8056421	519	*
1	8061210	8061866	657	*
1	8077132	8077584	453	*
1	8078129	8078742	614	*
1	8083936	8084311	376	*
1	8091027	8092074	1048	*
1	8097252	8097867	616	*
1	8116675	8117281	607	*
1	8120976	8121937	962	*
1	8133137	8134433	1297	*
1	8137571	8138215	645	*
1	8154664	8155068	405	*
1	8174167	8174752	586	*
1	8174826	8175216	391	*
1	8182045	8182894	850	*
1	8197557	8198307	751	*
1	8201308	8201770	463	*
1	8202127	8202895	769	*
1	8204242	8204825	584	*
1	8211590	8212531	942	*
1	8259109	8260196	1088	*
1	8293168	8293544	377	*
1	8314314	8314844	531	*
1	8317927	8318482	556	*
1	8343100	8344182	1083	*
1	8348835	8349324	490	*
1	8374829	8375168	340	*
1	8396916	8397401	486	*
1	8412187	8412863	677	*
1	8423257	8424720	1464	*
1	8438959	8439841	883	*
1	8525306	8526298	993	*
1	8555017	8555543	527	*
1	8625934	8627149	1216	*
1	8661398	8662216	819	*
1	8701007	8701803	797	*
1	8702923	8703804	882	*
1	8706986	8707318	333	*
1	8712143	8713272	1130	*
1	8726412	8727118	707	*
1	8733411	8734027	617	*
1	8816852	8818297	1446	*
1	8822616	8823109	494	*
1	8848695	8849556	862	*
1	8858069	8858460	392	*
1	8873535	8873960	426	*
1	8877917	8879527	1611	*
1	8880133	8880540	408	*
1	8889291	8890945	1655	*
1	8903565	8904541	977	*
1	8917907	8918469	563	*
1	8939441	8940069	629	*
1	8962817	8963618	802	*
1	8973972	8974539	568	*
1	8986140	8986735	596	*
1	9004938	9005498	561	*
1	9067218	9067545	328	*
1	9078585	9079385	801	*
1	9080580	9081287	708	*
1	9084880	9085569	690	*
1	9086040	9086428	389	*
1	9101559	9101915	357	*
1	9110483	9111282	800	*
1	9128051	9129959	1909	*
1	9145059	9145611	553	*
1	9162860	9164576	1717	*
1	9181109	9181848	740	*
1	9181917	9183190	1274	*
1	9201488	9202207	720	*
1	9234164	9235461	1298	*
1	9266962	9267588	627	*
1	9270407	9270961	555	*
1	9275504	9276079	576	*
1	9280380	9280983	604	*
1	9290034	9290819	786	*
1	9291947	9293371	1425	*
1	9299944	9300676	733	*
1	9302765	9303564	800	*
1	9315482	9316487	1006	*
1	9317606	9318262	657	*
1	9321269	9321927	659	*
1	9350142	9350978	837	*
1	9376478	9377551	1074	*
1	9384528	9385345	818	*
1	9388440	9389286	847	*
1	9400419	9401027	609	*
1	9401773	9402245	473	*
1	9412894	9414107	1214	*
1	9428593	9429489	897	*
1	9438540	9439248	709	*
1	9472831	9473620	790	*
1	9491073	9491438	366	*
1	9495001	9495791	791	*
1	9539096	9540467	1372	*
1	9561422	9561959	538	*
1	9588276	9589863	1588	*
1	9615416	9615921	506	*
1	9626926	9627572	647	*
1	9644727	9645041	315	*
1	9687223	9688132	910	*
1	9688981	9690189	1209	*
1	9718898	9719730	833	*
1	9724970	9725375	406	*
1	9792233	9792884	652	*
1	9798029	9799034	1006	*
1	9822934	9824717	1784	*
1	9825081	9826006	926	*
1	9842606	9843851	1246	*
1	9867334	9867868	535	*
1	9874904	9875276	373	*
1	9877909	9878417	509	*
1	9890164	9890797	634	*
1	9909864	9911256	1393	*
1	9942484	9943793	1310	*
1	9950311	9950801	491	*
1	9960790	9961680	891	*
1	9996858	9998105	1248	*
1	10032407	10033857	1451	*
1	10055694	10056128	435	*
1	10074040	10074780	741	*
1	10082735	10083451	717	*
1	10107876	10108800	925	*
1	10122911	10123477	567	*
1	10195562	10196064	503	*
1	10209779	10212111	2333	*
1	10339751	10340140	390	*
1	10377395	10377903	509	*
1	10380634	10380936	303	*
1	10387371	10388677	1307	*
1	10398376	10399942	1567	*
1	10415129	10415748	620	*
1	10430089	10431323	1235	*
1	10459031	10459602	572	*
1	10471803	10472809	1007	*
1	10474725	10475631	907	*
1	10494513	10495314	802	*
1	10507413	10507821	409	*
1	10510464	10511184	721	*
1	10528014	10529439	1426	*
1	10537209	10537745	537	*
1	10575667	10576001	335	*
1	10599111	10599933	823	*
1	10602083	10602460	378	*
1	10634631	10635989	1359	*
1	10646417	10646685	269	*
1	10693797	10695349	1553	*
1	10724037	10724702	666	*
1	10727686	10728267	582	*
1	10731032	10731422	391	*
1	10755777	10756515	739	*
1	10779145	10779701	557	*
1	10788555	10789085	531	*
1	10796186	10796926	741	*
1	10804049	10804867	819	*
1	10822909	10823397	489	*
1	10824779	10825260	482	*
1	10831012	10831459	448	*
1	10835857	10836305	449	*
1	10837179	10837762	584	*
1	10866624	10867666	1043	*
1	10900246	10901828	1583	*
1	10909936	10910284	349	*
1	10943996	10944797	802	*
1	10960842	10961545	704	*
1	10965597	10966214	618	*
1	10975639	10976291	653	*
1	10980019	10980520	502	*
1	10990041	10990636	596	*
1	11011836	11013440	1605	*
1	11037611	11038151	541	*
1	11046177	11046548	372	*
1	11059102	11060596	1495	*
1	11099138	11100177	1040	*
1	11133985	11135217	1233	*
1	11158428	11159143	716	*
1	11178052	11178937	886	*
1	11180248	11180854	607	*
1	11241654	11242224	571	*
1	11262103	11263040	938	*
1	11272691	11274111	1421	*
1	11281343	11282608	1266	*
1	11292496	11293220	725	*
1	11293842	11294219	378	*
1	11337529	11337794	266	*
1	11478537	11479628	1092	*
1	11550691	11551034	344	*
1	11635868	11636156	289	*
1	11645757	11646402	646	*
1	11653093	11653726	634	*
1	11654328	11655182	855	*
1	11663960	11664713	754	*
1	11680462	11681912	1451	*
1	11692788	11693683	896	*
1	11733289	11733755	467	*
1	11735765	11737464	1700	*
1	11748987	11749596	610	*
1	11784989	11785647	659	*
1	11787338	11788052	715	*
1	11790726	11791478	753	*
1	11803129	11803892	764	*
1	11804931	11806558	1628	*
1	11821334	11822102	769	*
1	11838363	11839006	644	*
1	11893805	11894287	483	*
1	11901434	11901911	478	*
1	11908088	11909960	1873	*
1	11918667	11919478	812	*
1	11925863	11926843	981	*
1	11934214	11935167	954	*
1	11938991	11939621	631	*
1	11940552	11940989	438	*
1	11961214	11961645	432	*
1	11966811	11967533	723	*
1	11979547	11980841	1295	*
1	12001973	12002583	611	*
1	12018999	12020429	1431	*
1	12030968	12031654	687	*
1	12040390	12041040	651	*
1	12044149	12044659	511	*
1	12051910	12052580	671	*
1	12075584	12076123	540	*
1	12132056	12132648	593	*
1	12132884	12133563	680	*
1	12135646	12135988	343	*
1	12143378	12144311	934	*
1	12153131	12153821	691	*
1	12161590	12162446	857	*
1	12166784	12167403	620	*
1	12208656	12209395	740	*
1	12229709	12231452	1744	*
1	12285482	12285854	373	*
1	12309715	12310422	708	*
1	12355989	12356746	758	*
1	12454439	12455486	1048	*
1	12477954	12478924	971	*
1	12480773	12481156	384	*
1	12518737	12519737	1001	*
1	12525373	12525886	514	*
1	12539816	12540874	1059	*
1	12541480	12541901	422	*
1	12548711	12550359	1649	*
1	12556259	12556924	666	*
1	12572596	12574565	1970	*
1	12579924	12580662	739	*
1	12588043	12588742	700	*
1	12595158	12596854	1697	*
1	12601895	12602487	593	*
1	12604175	12604754	580	*
1	12615949	12616877	929	*
1	12617921	12619451	1531	*
1	12636227	12637250	1024	*
1	12658959	12659359	401	*
1	12810695	12811267	573	*
1	12851733	12852270	538	*
1	13543917	13544277	361	*
1	13699962	13700727	766	*
1	13748799	13750166	1368	*
1	13766735	13767480	746	*
1	13965808	13966202	395	*
1	14055363	14056159	797	*
1	14108774	14109504	731	*
1	14113050	14114164	1115	*
1	14140710	14141440	731	*
1	14142411	14142846	436	*
1	14174833	14175522	690	*
1	14190422	14190930	509	*
1	14254211	14254766	556	*
1	14259089	14259682	594	*
1	14278884	14279397	514	*
1	14282604	14283198	595	*
1	14291088	14291745	658	*
1	14296696	14297144	449	*
1	14304329	14304939	611	*
1	14320451	14320996	546	*
1	14332134	14332792	659	*
1	14339932	14340867	936	*
1	14346000	14346639	640	*
1	14360940	14361494	555	*
1	14366158	14366848	691	*
1	14390676	14391212	537	*
1	14413527	14414288	762	*
1	14486278	14487274	997	*
1	14517069	14518016	948	*
1	14522343	14523256	914	*
1	14553608	14554318	711	*
1	14598005	14599552	1548	*
1	14625750	14626292	543	*
1	14653378	14654131	754	*
1	14731912	14732295	384	*
1	14742103	14742891	789	*
1	14765583	14766358	776	*
1	14810646	14811481	836	*
1	14815031	14815835	805	*
1	14822425	14822994	570	*
1	14826084	14826623	540	*
1	14894776	14895438	663	*
1	14910952	14911763	812	*
1	14923717	14925261	1545	*
1	14929427	14930189	763	*
1	14945182	14945996	815	*
1	14946874	14947500	627	*
1	14954029	14954589	561	*
1	14968252	14968973	722	*
1	14970211	14970532	322	*
1	14987881	14988606	726	*
1	14996018	14997092	1075	*
1	15003098	15003855	758	*
1	15014326	15014935	610	*
1	15027620	15028560	941	*
1	15046429	15047033	605	*
1	15056905	15057288	384	*
1	15089231	15089900	670	*
1	15090258	15090853	596	*
1	15128517	15128881	365	*
1	15152352	15154356	2005	*
1	15178753	15179538	786	*
1	15200384	15201120	737	*
1	15247007	15247735	729	*
1	15261216	15261783	568	*
1	15272382	15272916	535	*
1	15282833	15283335	503	*
1	15284537	15285494	958	*
1	15290344	15290834	491	*
1	15304723	15305225	503	*
1	15323048	15324279	1232	*
1	15337486	15338463	978	*
1	15352327	15352803	477	*
1	15356074	15357276	1203	*
1	15409341	15410473	1133	*
1	15415977	15416665	689	*
1	15426769	15427174	406	*
1	15459665	15460318	654	*
1	15501442	15501760	319	*
1	15523891	15525513	1623	*
1	15526399	15527291	893	*
1	15584334	15585390	1057	*
1	15603050	15604053	1004	*
1	15616770	15618252	1483	*
1	15678590	15678948	359	*
1	15680712	15681613	902	*
1	15684148	15684491	344	*
1	15702919	15703452	534	*
1	15741213	15741933	721	*
1	15758543	15759627	1085	*
1	15786563	15787128	566	*
1	15788082	15788647	566	*
1	15795109	15795539	431	*
1	15796609	15797251	643	*
1	15799043	15799837	795	*
1	15799913	15801455	1543	*
1	15815402	15816055	654	*
1	15825461	15826205	745	*
1	15833128	15833630	503	*
1	15834322	15836437	2116	*
1	15847195	15848706	1512	*
1	15849296	15850296	1001	*
1	15865816	15866267	452	*
1	15885752	15886861	1110	*
1	15916453	15916948	496	*
1	15919340	15919703	364	*
1	15923281	15923636	356	*
1	15924559	15925268	710	*
1	15939254	15939713	460	*
1	15949078	15950347	1270	*
1	15952438	15953065	628	*
1	15963792	15964602	811	*
1	15975293	15976335	1043	*
1	15994308	15994903	596	*
1	16007077	16007453	377	*
1	16012642	16013789	1148	*
1	16016011	16016558	548	*
1	16032537	16033239	703	*
1	16048545	16049145	601	*
1	16055595	16056450	856	*
1	16075965	16077243	1279	*
1	16078968	16079452	485	*
1	16082357	16082826	470	*
1	16112827	16113496	670	*
1	16138884	16140061	1178	*
1	16143651	16144328	678	*
1	16144997	16147211	2215	*
1	16154754	16155345	592	*
1	16155577	16156391	815	*
1	16164157	16164723	567	*
1	16167378	16168160	783	*
1	16173056	16173951	896	*
1	16174257	16174697	441	*
1	16175569	16176594	1026	*
1	16181626	16182545	920	*
1	16187637	16188220	584	*
1	16188981	16189394	414	*
1	16206189	16207354	1166	*
1	16217015	16217949	935	*
1	16236094	16237715	1622	*
1	16244359	16244735	377	*
1	16248666	16249126	461	*
1	16249876	16250262	387	*
1	16254264	16254959	696	*
1	16324338	16324839	502	*
1	16351874	16353130	1257	*
1	16366901	16368110	1210	*
1	16375397	16376281	885	*
1	16383782	16384317	536	*
1	16386166	16387311	1146	*
1	16440173	16441579	1407	*
1	16498672	16500160	1489	*
1	16513463	16514615	1153	*
1	16534270	16534584	315	*
1	16534683	16535789	1107	*
1	16612593	16614049	1457	*
1	16620936	16621381	446	*
1	16623921	16624518	598	*
1	16624965	16625207	243	*
1	16643678	16645235	1558	*
1	16677785	16678457	673	*
1	16707447	16708095	649	*
1	16727176	16728054	879	*
1	16872499	16873825	1327	*
1	16888767	16889981	1215	*
1	16895441	16897032	1592	*
1	16903797	16905771	1975	*
1	16913509	16914671	1163	*
1	16948129	16949371	1243	*
1	16951619	16952024	406	*
1	16960592	16961285	694	*
1	16966868	16967971	1104	*
1	16971755	16972344	590	*
1	16979901	16981049	1149	*
1	17003622	17004568	947	*
1	17010658	17012336	1679	*
1	17015931	17016587	657	*
1	17027417	17028207	791	*
1	17053708	17054681	974	*
1	17059608	17060031	424	*
1	17113651	17114423	773	*
1	17119339	17119677	339	*
1	17121126	17121720	595	*
1	17125726	17126124	399	*
1	17128283	17129080	798	*
1	17162767	17163308	542	*
1	17167992	17168878	887	*
1	17169227	17169713	487	*
1	17189889	17190690	802	*
1	17191224	17191778	555	*
1	17207712	17208430	719	*
1	17212004	17213208	1205	*
1	17226295	17226895	601	*
1	17232921	17234211	1291	*
1	17236855	17237616	762	*
1	17250475	17251255	781	*
1	17251553	17252086	534	*
1	17259124	17259740	617	*
1	17276477	17277138	662	*
1	17287314	17287858	545	*
1	17289665	17290309	645	*
1	17297972	17298400	429	*
1	17318185	17318845	661	*
1	17335907	17336419	513	*
1	17340306	17340739	434	*
1	17348010	17348735	726	*
1	17405996	17406642	647	*
1	17437663	17438776	1114	*
1	17439641	17440176	536	*
1	17460111	17461069	959	*
1	17475720	17476338	619	*
1	17494112	17494789	678	*
1	17502170	17502826	657	*
1	17531557	17532601	1045	*
1	17539631	17540946	1316	*
1	17545283	17545903	621	*
1	17550998	17551579	582	*
1	17551672	17552339	668	*
1	17561301	17562050	750	*
1	17563949	17564286	338	*
1	17564420	17564980	561	*
1	17569118	17570307	1190	*
1	17587600	17588831	1232	*
1	17606745	17607215	471	*
1	17624120	17625363	1244	*
1	17653713	17654147	435	*
1	17696393	17696790	398	*
1	17765457	17766421	965	*
1	17768506	17769344	839	*
1	17826027	17826530	504	*
1	17857993	17858481	489	*
1	17866109	17866899	791	*
1	17874187	17875111	925	*
1	18022000	18022682	683	*
1	18092034	18092435	402	*
1	18480347	18481168	822	*
1	18597261	18597825	565	*
1	18618372	18618991	620	*
1	18668796	18669137	342	*
1	18820601	18821128	528	*
1	18875100	18875753	654	*
1	18901985	18903316	1332	*
1	18912895	18913470	576	*
1	18922148	18922856	709	*
1	18926343	18927012	670	*
1	18941104	18942103	1000	*
1	18949105	18950337	1233	*
1	18955513	18957429	1917	*
1	18962156	18962600	445	*
1	19009776	19011560	1785	*
1	19033868	19034536	669	*
1	19054297	19054630	334	*
1	19066308	19066680	373	*
1	19066885	19067823	939	*
1	19096272	19096689	418	*
1	19203364	19203828	465	*
1	19209545	19210904	1360	*
1	19241102	19241744	643	*
1	19251371	19252485	1115	*
1	19288617	19289443	827	*
1	19311194	19312964	1771	*
1	19344268	19344748	481	*
1	19430157	19430786	630	*
1	19440436	19440915	480	*
1	19450626	19451413	788	*
1	19469375	19469968	594	*
1	19484386	19486311	1926	*
1	19596386	19597821	1436	*
1	19635700	19636221	522	*
1	19640411	19641137	727	*
1	19643153	19643495	343	*
1	19643601	19644448	848	*
1	19650912	19651483	572	*
1	19653557	19654222	666	*
1	19659625	19660124	500	*
1	19704353	19704922	570	*
1	19715474	19716130	657	*
1	19754367	19754922	556	*
1	19758161	19758851	691	*
1	19765404	19766046	643	*
1	19799272	19800603	1332	*
1	19861012	19861610	599	*
1	19863717	19864346	630	*
1	19866654	19867244	591	*
1	19882056	19883145	1090	*
1	19893362	19894568	1207	*
1	19918057	19918351	295	*
1	20100746	20101288	543	*
1	20124455	20124909	455	*
1	20152021	20152726	706	*
1	20212958	20213361	404	*
1	20216662	20216974	313	*
1	20279418	20279959	542	*
1	20358662	20359267	606	*
1	20411202	20411817	616	*
1	20440790	20441099	310	*
1	20476278	20476799	522	*
1	20485491	20486518	1028	*
1	20493775	20494559	785	*
1	20507403	20508502	1100	*
1	20522329	20522905	577	*
1	20530963	20531565	603	*
1	20575219	20576943	1725	*
1	20588585	20590166	1582	*
1	20601244	20601976	733	*
1	20604170	20604764	595	*
1	20612070	20612782	713	*
1	20613399	20614297	899	*
1	20633253	20635017	1765	*
1	20639961	20640555	595	*
1	20661166	20662070	905	*
1	20696416	20697413	998	*
1	20702475	20702778	304	*
1	20717459	20718417	959	*
1	20732044	20733628	1585	*
1	20786091	20788313	2223	*
1	20847361	20848735	1375	*
1	20896651	20897375	725	*
1	21022131	21022918	788	*
1	21083091	21083710	620	*
1	21091093	21091473	381	*
1	21149426	21150546	1121	*
1	21175693	21177446	1754	*
1	21194983	21195756	774	*
1	21231977	21232525	549	*
1	21252218	21252515	298	*
1	21255059	21255699	641	*
1	21261625	21263113	1489	*
1	21289667	21290857	1191	*
1	21294378	21295265	888	*
1	21302610	21303528	919	*
1	21308721	21309668	948	*
1	21311128	21311407	280	*
1	21317039	21317832	794	*
1	21318630	21319060	431	*
1	21324187	21325118	932	*
1	21331891	21332640	750	*
1	21335786	21336204	419	*
1	21337886	21339569	1684	*
1	21344631	21346069	1439	*
1	21355951	21356360	410	*
1	21368210	21369089	880	*
1	21370582	21370911	330	*
1	21378965	21379587	623	*
1	21439716	21440483	768	*
1	21490661	21491179	519	*
1	21508936	21509605	670	*
1	21539913	21540292	380	*
1	21574055	21575174	1120	*
1	21586675	21587491	817	*
1	21607516	21608311	796	*
1	21626854	21627408	555	*
1	21631881	21632652	772	*
1	21638461	21639359	899	*
1	21651144	21652078	935	*
1	21659095	21659698	604	*
1	21673268	21673787	520	*
1	21703322	21703878	557	*
1	21764326	21765526	1201	*
1	21782197	21784016	1820	*
1	21801131	21801483	353	*
1	21818711	21819051	341	*
1	21861954	21862541	588	*
1	21869554	21870466	913	*
1	21896742	21897472	731	*
1	21909262	21910447	1186	*
1	21920125	21921059	935	*
1	21927371	21927984	614	*
1	21930963	21931918	956	*
1	21935834	21936972	1139	*
1	21942886	21943495	610	*
1	21956496	21957403	908	*
1	21963808	21964397	590	*
1	22005204	22006001	798	*
1	22019014	22019536	523	*
1	22025013	22026312	1300	*
1	22039632	22040334	703	*
1	22052400	22053816	1417	*
1	22131887	22132942	1056	*
1	22143060	22143942	883	*
1	22204937	22205578	642	*
1	22217699	22218286	588	*
1	22275645	22276219	575	*
1	22332984	22333482	499	*
1	22341947	22342573	627	*
1	22387938	22388425	488	*
1	22388655	22389941	1287	*
1	22414104	22414760	657	*
1	22416455	22416911	457	*
1	22420428	22420845	418	*
1	22428614	22429439	826	*
1	22447600	22448024	425	*
1	22451592	22452933	1342	*
1	22600415	22601058	644	*
1	22641908	22642390	483	*
1	22689483	22689973	491	*
1	22704476	22704878	403	*
1	22739473	22740290	818	*
1	22750135	22751015	881	*
1	22780730	22781081	352	*
1	22831785	22832594	810	*
1	22870279	22870985	707	*
1	22916405	22916814	410	*
1	22930191	22930744	554	*
1	22964217	22964585	369	*
1	22969250	22969850	601	*
1	22976372	22977032	661	*
1	23010493	23011421	929	*
1	23019004	23020418	1415	*
1	23100054	23100548	495	*
1	23122314	23122870	557	*
1	23167314	23169077	1764	*
1	23177389	23178208	820	*
1	23188390	23189407	1018	*
1	23194364	23195334	971	*
1	23196732	23197421	690	*
1	23198226	23198764	539	*
1	23216729	23217863	1135	*
1	23224682	23225602	921	*
1	23273263	23273815	553	*
1	23282753	23283401	649	*
1	23343567	23345125	1559	*
1	23367566	23369977	2412	*
1	23402930	23403300	371	*
1	23403573	23404417	845	*
1	23411439	23412429	991	*
1	23423537	23425159	1623	*
1	23451646	23452636	991	*
1	23475311	23475666	356	*
1	23478763	23479393	631	*
1	23483313	23484941	1629	*
1	23496919	23497710	792	*
1	23528174	23528833	660	*
1	23530532	23531781	1250	*
1	23539628	23540325	698	*
1	23544685	23545274	590	*
1	23554541	23555272	732	*
1	23555929	23557241	1313	*
1	23559147	23559817	671	*
1	23562110	23562659	550	*
1	23567762	23568656	895	*
1	23576583	23577925	1343	*
1	23585305	23586197	893	*
1	23586574	23587070	497	*
1	23591468	23592053	586	*
1	23593485	23594106	622	*
1	23619382	23620033	652	*
1	23634671	23635841	1171	*
1	23637371	23637787	417	*
1	23651013	23651737	725	*
1	23657691	23658020	330	*
1	23673513	23673854	342	*
1	23691468	23692418	951	*
1	23718481	23718839	359	*
1	23742955	23744274	1320	*
1	23751123	23751631	509	*
1	23771865	23772612	748	*
1	23777842	23779029	1188	*
1	23779764	23780366	603	*
1	23790091	23790519	429	*
1	23790732	23791450	719	*
1	23791653	23792064	412	*
1	23799384	23801144	1761	*
1	23809680	23810150	471	*
1	23824827	23825732	906	*
1	23838112	23838913	802	*
1	23854457	23854977	521	*
1	23867647	23868840	1194	*
1	23907689	23908428	740	*
1	23916807	23917171	365	*
1	23919809	23920531	723	*
1	23930798	23931475	678	*
1	23951482	23952274	793	*
1	23958929	23960242	1314	*
1	23979800	23981075	1276	*
1	24003307	24003901	595	*
1	24008383	24008912	530	*
1	24009280	24009843	564	*
1	24018547	24019335	789	*
1	24022540	24023220	681	*
1	24045795	24046831	1037	*
1	24046979	24047490	512	*
1	24070804	24071374	571	*
1	24102871	24103404	534	*
1	24107807	24108270	464	*
1	24108339	24109302	964	*
1	24112372	24112880	509	*
1	24117618	24118159	542	*
1	24119782	24120868	1087	*
1	24142527	24143439	913	*
1	24149755	24151017	1263	*
1	24186961	24187840	880	*
1	24191944	24192302	359	*
1	24201929	24202521	593	*
1	24236187	24237198	1012	*
1	24266244	24267056	813	*
1	24283508	24284567	1060	*
1	24289735	24290522	788	*
1	24294280	24295432	1153	*
1	24321568	24322672	1105	*
1	24352057	24352664	608	*
1	24362988	24363395	408	*
1	24364529	24365750	1222	*
1	24391318	24391618	301	*
1	24392017	24392646	630	*
1	24413302	24413972	671	*
1	24415286	24416202	917	*
1	24443279	24443744	466	*
1	24502140	24503413	1274	*
1	24515504	24516161	658	*
1	24559043	24559744	702	*
1	24587244	24587543	300	*
1	24635194	24635563	370	*
1	24642147	24644292	2146	*
1	24678346	24678839	494	*
1	24683538	24684232	695	*
1	24688527	24689097	571	*
1	24705092	24706014	923	*
1	24713071	24713823	753	*
1	24744825	24746084	1260	*
1	24769880	24770620	741	*
1	24793643	24794348	706	*
1	24830536	24831026	491	*
1	24847768	24848835	1068	*
1	24861957	24862806	850	*
1	24898122	24898449	328	*
1	24929422	24930752	1331	*
1	24932261	24932625	365	*
1	24949222	24949851	630	*
1	25017317	25018022	706	*
1	25022153	25023271	1119	*
1	25031846	25032748	903	*
1	25101435	25101973	539	*
1	25167262	25167844	583	*
1	25182597	25183021	425	*
1	25231988	25232969	982	*
1	25233078	25233530	453	*
1	25239532	25240488	957	*
1	25246787	25248139	1353	*
1	25267678	25268358	681	*
1	25338087	25339032	946	*
1	25352176	25352640	465	*
1	25371478	25372347	870	*
1	25429915	25431485	1571	*
1	25506635	25507326	692	*
1	25523489	25523892	404	*
1	25543324	25544302	979	*
1	25544582	25545115	534	*
1	25549395	25550180	786	*
1	25556483	25557345	863	*
1	25568376	25569295	920	*
1	25573431	25573930	500	*
1	25608491	25608926	436	*
1	25615971	25617179	1209	*
1	25688347	25689248	902	*
1	25694241	25694751	511	*
1	25694952	25695530	579	*
1	25743313	25744484	1172	*
1	25799750	25800838	1089	*
1	25810642	25811351	710	*
1	25819517	25821092	1576	*
1	25858584	25859898	1315	*
1	25874756	25876232	1477	*
1	25890316	25890867	552	*
1	25892200	25892912	713	*
1	25895379	25895736	358	*
1	25905057	25905319	263	*
1	25905371	25907167	1797	*
1	25922635	25923490	856	*
1	25997605	25998708	1104	*
1	26034927	26036476	1550	*
1	26094228	26095211	984	*
1	26110717	26112651	1935	*
1	26144989	26145670	682	*
1	26161577	26162342	766	*
1	26169532	26170618	1087	*
1	26177116	26177738	623	*
1	26218913	26219677	765	*
1	26233636	26235002	1367	*
1	26279586	26280853	1268	*
1	26284788	26285327	540	*
1	26306247	26307148	902	*
1	26321155	26321928	774	*
1	26336030	26336998	969	*
1	26358730	26359236	507	*
1	26377921	26378830	910	*
1	26387152	26387745	594	*
1	26391467	26391962	496	*
1	26396249	26396595	347	*
1	26417020	26417440	421	*
1	26431862	26432872	1011	*
1	26471430	26473354	1925	*
1	26500043	26501786	1744	*
1	26529419	26531832	2414	*
1	26620082	26621724	1643	*
1	26636413	26637225	813	*
1	26677337	26678058	722	*
1	26692233	26693376	1144	*
1	26695327	26696440	1114	*
1	26697796	26698529	734	*
1	26705504	26706375	872	*
1	26723262	26724052	791	*
1	26771327	26772275	949	*
1	26783968	26784372	405	*
1	26787543	26788691	1149	*
1	26788908	26789414	507	*
1	26799517	26800352	836	*
1	26826131	26827505	1375	*
1	26848770	26849854	1085	*
1	26853124	26853441	318	*
1	26862849	26863610	762	*
1	26863910	26865662	1753	*
1	26877943	26878359	417	*
1	26889585	26890691	1107	*
1	26899795	26900698	904	*
1	26907200	26908005	806	*
1	26921235	26922420	1186	*
1	26966859	26967427	569	*
1	26980748	26981163	416	*
1	26993245	26994436	1192	*
1	26997687	26998081	395	*
1	26999005	27000056	1052	*
1	27009484	27010292	809	*
1	27010786	27011391	606	*
1	27012710	27013459	750	*
1	27031276	27031975	700	*
1	27044508	27045087	580	*
1	27097442	27097734	293	*
1	27099024	27100172	1149	*
1	27111868	27112583	716	*
1	27122487	27123124	638	*
1	27154619	27155677	1059	*
1	27192031	27193128	1098	*
1	27197823	27198406	584	*
1	27233985	27235674	1690	*
1	27284541	27285043	503	*
1	27296715	27297053	339	*
1	27300628	27301328	701	*
1	27306839	27307416	578	*
1	27321857	27322719	863	*
1	27349213	27350280	1068	*
1	27365405	27367365	1961	*
1	27380772	27381174	403	*
1	27392199	27392992	794	*
1	27395496	27395773	278	*
1	27416567	27416898	332	*
1	27436557	27436954	398	*
1	27489636	27490929	1294	*
1	27525435	27526219	785	*
1	27528143	27529371	1229	*
1	27536796	27537113	318	*
1	27540079	27540930	852	*
1	27542268	27543180	913	*
1	27556845	27558399	1555	*
1	27568181	27569206	1026	*
1	27575191	27576263	1073	*
1	27589715	27590583	869	*
1	27590986	27591567	582	*
1	27601724	27602457	734	*
1	27603571	27604509	939	*
1	27643800	27644238	439	*
1	27650578	27651205	628	*
1	27658866	27660350	1485	*
1	27663062	27663489	428	*
1	27671880	27672928	1049	*
1	27686415	27687091	677	*
1	27725348	27726622	1275	*
1	27772739	27773971	1233	*
1	27817159	27817687	529	*
1	27830351	27831494	1144	*
1	27857905	27858839	935	*
1	27872178	27872919	742	*
1	27875144	27875654	511	*
1	27914071	27915043	973	*
1	27934747	27935363	617	*
1	27959342	27960398	1057	*
1	27968725	27969075	351	*
1	27979605	27980019	415	*
1	28087679	28089169	1491	*
1	28105071	28105559	489	*
1	28123426	28124085	660	*
1	28153177	28153540	364	*
1	28208896	28209193	298	*
1	28232411	28233169	759	*
1	28235610	28236687	1078	*
1	28246976	28247613	638	*
1	28249421	28249824	404	*
1	28259104	28260784	1681	*
1	28296674	28297322	649	*
1	28313765	28314460	696	*
1	28328723	28329788	1066	*
1	28346099	28346738	640	*
1	28351553	28352483	931	*
1	28353666	28354615	950	*
1	28359677	28359984	308	*
1	28369367	28370630	1264	*
1	28391783	28392599	817	*
1	28409773	28410262	490	*
1	28417368	28417965	598	*
1	28437234	28438500	1267	*
1	28449893	28450476	584	*
1	28471490	28472023	534	*
1	28505545	28506697	1153	*
1	28517841	28519323	1483	*
1	28552512	28554013	1502	*
1	28581078	28582365	1288	*
1	28591867	28593149	1283	*
1	28594604	28595256	653	*
1	28601628	28602387	760	*
1	28642183	28643594	1412	*
1	28648025	28648462	438	*
1	28648513	28649412	900	*
1	28668170	28669770	1601	*
1	28721907	28722276	370	*
1	28736291	28738086	1796	*
1	28785033	28785858	826	*
1	28846265	28846567	303	*
1	28859877	28861124	1248	*
1	28865862	28866331	470	*
1	28877147	28877567	421	*
1	28882069	28882530	462	*
1	28884701	28885362	662	*
1	28886754	28887407	654	*
1	28887469	28888493	1025	*
1	28914065	28915517	1453	*
1	28927645	28928228	584	*
1	28972022	28972903	882	*
1	29122038	29123288	1251	*
1	29124210	29125099	890	*
1	29133640	29134555	916	*
1	29181069	29182369	1301	*
1	29197483	29197883	401	*
1	29202672	29203407	736	*
1	29230549	29231392	844	*
1	29236198	29236854	657	*
1	29239130	29239611	482	*
1	29245497	29246315	819	*
1	29257039	29258129	1091	*
1	29271451	29272402	952	*
1	29282929	29283760	832	*
1	29513330	29513720	391	*
1	29569887	29570745	859	*
1	29584715	29585390	676	*
1	29640078	29640612	535	*
1	29649405	29650231	827	*
1	29697982	29698497	516	*
1	29706970	29707314	345	*
1	29708908	29710124	1217	*
1	29793041	29793517	477	*
1	29974219	29974801	583	*
1	30083715	30084489	775	*
1	30109781	30110264	484	*
1	30191135	30191759	625	*
1	30525787	30526526	740	*
1	30657592	30658207	616	*
1	30670297	30671038	742	*
1	30707981	30708428	448	*
1	30717894	30719673	1780	*
1	30779617	30779961	345	*
1	30782364	30782673	310	*
1	30801616	30802251	636	*
1	30807200	30807841	642	*
1	30816306	30817031	726	*
1	30823691	30824917	1227	*
1	30854156	30854477	322	*
1	30909979	30910383	405	*
1	30911194	30911826	633	*
1	30929211	30929958	748	*
1	30966675	30967307	633	*
1	31064926	31066202	1277	*
1	31101130	31101516	387	*
1	31111202	31111834	633	*
1	31135711	31136595	885	*
1	31154599	31155861	1263	*
1	31162578	31163057	480	*
1	31170564	31171440	877	*
1	31181451	31182760	1310	*
1	31238984	31240187	1204	*
1	31296392	31297759	1368	*
1	31372919	31374083	1165	*
1	31394502	31395254	753	*
1	31413009	31414198	1190	*
1	31422498	31423059	562	*
1	31482766	31484015	1250	*
1	31497536	31498150	615	*
1	31520712	31521352	641	*
1	31523735	31524183	449	*
1	31530850	31531841	992	*
1	31548656	31550196	1541	*
1	31551076	31551684	609	*
1	31573768	31574562	795	*
1	31575501	31576719	1219	*
1	31583907	31584551	645	*
1	31588525	31589266	742	*
1	31591732	31592234	503	*
1	31593891	31594344	454	*
1	31644277	31645450	1174	*
1	31666198	31667029	832	*
1	31669610	31670581	972	*
1	31689638	31690299	662	*
1	31700785	31701956	1172	*
1	31712449	31713130	682	*
1	31714659	31715876	1218	*
1	31736542	31737235	694	*
1	31745317	31747043	1727	*
1	31753738	31754373	636	*
1	31762557	31763393	837	*
1	31769457	31770430	974	*
1	31775291	31776165	875	*
1	31788125	31789713	1589	*
1	31798157	31799405	1249	*
1	31815826	31816281	456	*
1	31897253	31898351	1099	*
1	31937386	31938886	1501	*
1	31939636	31940236	601	*
1	31944212	31945125	914	*
1	31954225	31955532	1308	*
1	31955994	31956528	535	*
1	31963895	31964673	779	*
1	31977699	31978147	449	*
1	32003559	32003858	300	*
1	32013208	32015021	1814	*
1	32062291	32063188	898	*
1	32066334	32066863	530	*
1	32072339	32073658	1320	*
1	32100897	32101802	906	*
1	32107596	32108915	1320	*
1	32133147	32133963	817	*
1	32142761	32143126	366	*
1	32179230	32180828	1599	*
1	32200191	32201183	993	*
1	32205315	32206404	1090	*
1	32208831	32209219	389	*
1	32215466	32216143	678	*
1	32221860	32222918	1059	*
1	32235895	32236569	675	*
1	32240191	32241787	1597	*
1	32246799	32247515	717	*
1	32248056	32248691	636	*
1	32291640	32292953	1314	*
1	32335016	32336586	1571	*
1	32351041	32352434	1394	*
1	32393882	32395188	1307	*
1	32400829	32401502	674	*
1	32413677	32414297	621	*
1	32448331	32449601	1271	*
1	32499933	32501197	1265	*
1	32520457	32521104	648	*
1	32539022	32540374	1353	*
1	32611928	32612729	802	*
1	32650206	32651823	1618	*
1	32701458	32704287	2830	*
1	32712163	32712691	529	*
1	32716431	32717195	765	*
1	32724553	32725772	1220	*
1	32741224	32741897	674	*
1	32759266	32760665	1400	*
1	32761013	32761895	883	*
1	32769469	32770044	576	*
1	32772949	32773488	540	*
1	32775128	32775996	869	*
1	32789266	32789834	569	*
1	32795433	32796180	748	*
1	32816685	32818636	1952	*
1	32877752	32878624	873	*
1	32892834	32893789	956	*
1	32901077	32901865	789	*
1	32933417	32934455	1039	*
1	32948237	32948702	466	*
1	32948783	32949298	516	*
1	32963598	32965145	1548	*
1	32981087	32981831	745	*
1	32988750	32989616	867	*
1	32992284	32992988	705	*
1	33007193	33007927	735	*
1	33036012	33037256	1245	*
1	33047887	33048394	508	*
1	33050170	33050860	691	*
1	33055156	33055877	722	*
1	33060422	33061282	861	*
1	33068059	33068547	489	*
1	33080790	33081631	842	*
1	33086332	33086864	533	*
1	33099116	33099981	866	*
1	33112047	33112349	303	*
1	33126915	33127662	748	*
1	33152796	33153525	730	*
1	33163439	33164113	675	*
1	33180604	33182317	1714	*
1	33218741	33219035	295	*
1	33220849	33221523	675	*
1	33244116	33244748	633	*
1	33255395	33256221	827	*
1	33256400	33257324	925	*
1	33295444	33295844	401	*
1	33298498	33299128	631	*
1	33306503	33307572	1070	*
1	33327647	33328331	685	*
1	33349112	33350667	1556	*
1	33367588	33368300	713	*
1	33430296	33431508	1213	*
1	33443486	33444176	691	*
1	33455832	33456195	364	*
1	33470514	33470896	383	*
1	33472096	33472999	904	*
1	33612721	33613222	502	*
1	34163000	34163482	483	*
1	34597813	34598246	434	*
1	34681511	34681825	315	*
1	34742637	34743177	541	*
1	34754974	34755638	665	*
1	34762638	34763975	1338	*
1	34781009	34782359	1351	*
1	34783558	34783950	393	*
1	34786444	34786822	379	*
1	34852640	34853293	654	*
1	34858817	34860250	1434	*
1	34865677	34866838	1162	*
1	34983972	34985736	1765	*
1	35030922	35032285	1364	*
1	35047340	35047827	488	*
1	35062717	35063296	580	*
1	35079057	35079957	901	*
1	35122421	35122753	333	*
1	35191905	35193740	1836	*
1	35202094	35202468	375	*
1	35268388	35269540	1153	*
1	35450953	35451424	472	*
1	35505812	35506794	983	*
1	35538344	35538890	547	*
1	35556806	35557997	1192	*
1	35564487	35564964	478	*
1	35568899	35569262	364	*
1	35573059	35573855	797	*
1	35640845	35642258	1414	*
1	35707423	35708366	944	*
1	35717802	35719348	1547	*
1	35726700	35727403	704	*
1	35769138	35770417	1280	*
1	35807429	35809293	1865	*
1	35882790	35884217	1428	*
1	35930208	35931938	1731	*
1	36088428	36089915	1488	*
1	36097050	36097407	358	*
1	36099381	36100338	958	*
1	36133323	36134111	789	*
1	36149022	36150074	1053	*
1	36150445	36151274	830	*
1	36155516	36157372	1857	*
1	36160839	36161495	657	*
1	36187750	36188657	908	*
1	36203403	36204632	1230	*
1	36217666	36217965	300	*
1	36223718	36225267	1550	*
1	36248293	36249116	824	*
1	36266162	36266783	622	*
1	36285457	36285962	506	*
1	36299813	36300400	588	*
1	36306003	36307570	1568	*
1	36323009	36324005	997	*
1	36342599	36343432	834	*
1	36350703	36352018	1316	*
1	36373749	36375164	1416	*
1	36385032	36387145	2114	*
1	36397162	36398198	1037	*
1	36408434	36409191	758	*
1	36420760	36421357	598	*
1	36450067	36450998	932	*
1	36463469	36464924	1456	*
1	36553684	36554196	513	*
1	36576048	36576446	399	*
1	36609270	36609599	330	*
1	36703721	36704144	424	*
1	37177247	37177602	356	*
1	37434229	37434874	646	*
1	37454679	37455630	952	*
1	37471360	37472249	890	*
1	37474281	37474804	524	*
1	37476490	37477463	974	*
1	37479621	37480187	567	*
1	37486935	37487706	772	*
1	37498952	37499653	702	*
1	37513909	37515336	1428	*
1	37534213	37534938	726	*
1	37553891	37554616	726	*
1	37595304	37596453	1150	*
1	37634533	37634904	372	*
1	37690034	37690878	845	*
1	37691488	37692887	1400	*
1	37752646	37753572	927	*
1	37793494	37794575	1082	*
1	37807552	37809328	1777	*
1	37859007	37860472	1466	*
1	37931149	37932261	1113	*
1	37946108	37947278	1171	*
1	37989300	37990590	1291	*
1	37995734	37996880	1147	*
1	38000369	38001029	661	*
1	38005120	38005976	857	*
1	38012174	38013348	1175	*
1	38029576	38030500	925	*
1	38046677	38047732	1056	*
1	38064104	38064678	575	*
1	38088320	38088793	474	*
1	38114143	38114686	544	*
1	38138326	38139259	934	*
1	38221001	38221636	636	*
1	38235732	38236113	382	*
1	38246776	38247343	568	*
1	38588934	38589424	491	*
1	38786368	38786975	608	*
1	38835263	38835594	332	*
1	38858831	38860458	1628	*
1	38872709	38873980	1272	*
1	38941243	38942212	970	*
1	38973080	38973584	505	*
1	38990596	38992446	1851	*
1	39025900	39027211	1312	*
1	39081044	39082035	992	*
1	39092260	39092686	427	*
1	39098459	39099129	671	*
1	39104950	39106646	1697	*
1	39127508	39127914	407	*
1	39130246	39130726	481	*
1	39159191	39159629	439	*
1	39167577	39168201	625	*
1	39178042	39179389	1348	*
1	39183585	39184341	757	*
1	39191620	39192746	1127	*
1	39204386	39205080	695	*
1	39258643	39259114	472	*
1	39266292	39266608	317	*
1	39387387	39387794	408	*
1	39391899	39392387	489	*
1	39395444	39395907	464	*
1	39398289	39399163	875	*
1	39408299	39409768	1470	*
1	39490904	39491992	1089	*
1	39514622	39515045	424	*
1	39539017	39539569	553	*
1	39559116	39559979	864	*
1	39574318	39574975	658	*
1	39576369	39577171	803	*
1	39605936	39606781	846	*
1	39609563	39609977	415	*
1	39632694	39633453	760	*
1	39639365	39640192	828	*
1	39653520	39654012	493	*
1	39691022	39691830	809	*
1	39701533	39702257	725	*
1	39738586	39739437	852	*
1	39788410	39789643	1234	*
1	39799072	39800216	1145	*
1	39816617	39817174	558	*
1	39845516	39846303	788	*
1	39852156	39852799	644	*
1	39882744	39883864	1121	*
1	39892510	39893622	1113	*
1	39900810	39902561	1752	*
1	39919508	39919899	392	*
1	39934211	39934931	721	*
1	39954828	39956273	1446	*
1	39960382	39960893	512	*
1	39973489	39973768	280	*
1	40039377	40041105	1729	*
1	40078511	40078876	366	*
1	40084739	40085212	474	*
1	40096730	40097859	1130	*
1	40143824	40144422	599	*
1	40160999	40162091	1093	*
1	40257375	40258723	1349	*
1	40267693	40268303	611	*
1	40315215	40315791	577	*
1	40315890	40317097	1208	*
1	40338432	40339096	665	*
1	40373353	40375005	1653	*
1	40379816	40380392	577	*
1	40438408	40438793	386	*
1	40449697	40451215	1519	*
1	40476904	40478017	1114	*
1	40508308	40509455	1148	*
1	40531177	40532200	1024	*
1	40583292	40583834	543	*
1	40612296	40612966	671	*
1	40665189	40666144	956	*
1	40668796	40669134	339	*
1	40691372	40692837	1466	*
1	40703270	40703938	669	*
1	40711339	40712041	703	*
1	40774211	40774519	309	*
1	40783200	40783953	754	*
1	40802174	40802839	666	*
1	40848499	40848961	463	*
1	40849800	40850351	552	*
1	40861920	40862946	1027	*
1	40868287	40868670	384	*
1	40875687	40876080	394	*
1	40877567	40878284	718	*
1	40897450	40897908	459	*
1	40898417	40899021	605	*
1	40901832	40902510	679	*
1	40944261	40944803	543	*
1	40952322	40953007	686	*
1	40967410	40968603	1194	*
1	40979277	40980625	1349	*
1	41003358	41004216	859	*
1	41101993	41102933	941	*
1	41109287	41110363	1077	*
1	41123084	41123776	693	*
1	41152311	41153280	970	*
1	41241226	41242794	1569	*
1	41268143	41268670	528	*
1	41282706	41283209	504	*
1	41322896	41323246	351	*
1	41360860	41362185	1326	*
1	41371736	41372621	886	*
1	41381095	41383062	1968	*
1	41387692	41388059	368	*
1	41418834	41419448	615	*
1	41423463	41424401	939	*
1	41432250	41433535	1286	*
1	41442539	41443261	723	*
1	41455651	41456291	641	*
1	41474468	41475353	886	*
1	41476707	41477379	673	*
1	41482288	41483515	1228	*
1	41484270	41485214	945	*
1	41493022	41493674	653	*
1	41496115	41496651	537	*
1	41498656	41499284	629	*
1	41501532	41502171	640	*
1	41514370	41514766	397	*
1	41515058	41515594	537	*
1	41515732	41516732	1001	*
1	41537647	41538325	679	*
1	41573874	41574659	786	*
1	41618101	41618446	346	*
1	41626048	41626635	588	*
1	41626719	41627354	636	*
1	41629594	41630033	440	*
1	41649967	41650496	530	*
1	41661463	41663186	1724	*
1	41665295	41665592	298	*
1	41672067	41672833	767	*
1	41712657	41713238	582	*
1	41713643	41714307	665	*
1	41773031	41773605	575	*
1	41782940	41783718	779	*
1	41812085	41812967	883	*
1	41823305	41823938	634	*
1	41862225	41863455	1231	*
1	41870033	41870587	555	*
1	41900478	41901240	763	*
1	41902015	41902584	570	*
1	41917891	41918446	556	*
1	41954463	41955027	565	*
1	41955444	41956174	731	*
1	42003374	42003836	463	*
1	42035139	42036334	1196	*
1	42146862	42147208	347	*
1	42165366	42166393	1028	*
1	42176995	42177268	274	*
1	42214411	42215121	711	*
1	42334234	42336000	1767	*
1	42349892	42350439	548	*
1	42380254	42381218	965	*
1	42420771	42421437	667	*
1	42439882	42440548	667	*
1	42455811	42457260	1450	*
1	42462790	42463731	942	*
1	42657928	42659240	1313	*
1	42681725	42683360	1636	*
1	42756840	42757330	491	*
1	42765912	42767801	1890	*
1	42816475	42817644	1170	*
1	42846029	42847340	1312	*
1	42922968	42923358	391	*
1	42923869	42925144	1276	*
1	42936103	42937573	1471	*
1	42940929	42941457	529	*
1	42941698	42942183	486	*
1	42943138	42943740	603	*
1	42957774	42959457	1684	*
1	42962663	42963010	348	*
1	42966960	42967629	670	*
1	43008225	43009059	835	*
1	43048682	43049421	740	*
1	43073491	43074095	605	*
1	43147455	43148057	603	*
1	43171617	43172901	1285	*
1	43206527	43207831	1305	*
1	43227103	43227634	532	*
1	43238137	43238424	288	*
1	43256563	43257359	797	*
1	43293676	43295020	1345	*
1	43348470	43350280	1811	*
1	43358082	43359548	1467	*
1	43366700	43368625	1926	*
1	43373101	43373755	655	*
1	43389299	43390292	994	*
1	43414460	43415196	737	*
1	43423435	43424249	815	*
1	43452791	43454204	1414	*
1	43454439	43454896	458	*
1	43472456	43473180	725	*
1	43475696	43476447	752	*
1	43523093	43523511	419	*
1	43529251	43529501	251	*
1	43530569	43532140	1572	*
1	43582033	43582712	680	*
1	43634723	43635102	380	*
1	43649494	43650856	1363	*
1	43706619	43708197	1579	*
1	43763347	43764076	730	*
1	43774367	43774714	348	*
1	43776459	43776844	386	*
1	43783171	43784254	1084	*
1	43821828	43822694	867	*
1	43834939	43835880	942	*
1	43836390	43837018	629	*
1	43853094	43853935	842	*
1	43858093	43858973	881	*
1	43868399	43869063	665	*
1	43879405	43879998	594	*
1	43884951	43885903	953	*
1	43912597	43913267	671	*
1	43933149	43935113	1965	*
1	43946180	43948012	1833	*
1	43969522	43970344	823	*
1	43974254	43975682	1429	*
1	43979548	43980338	791	*
1	43990987	43992242	1256	*
1	44005633	44006244	612	*
1	44029703	44031793	2091	*
1	44035984	44036908	925	*
1	44047713	44048543	831	*
1	44048821	44049312	492	*
1	44049446	44050486	1041	*
1	44089668	44090119	452	*
1	44101091	44101949	859	*
1	44154689	44155606	918	*
1	44213180	44213951	772	*
1	44217749	44218301	553	*
1	44240787	44241136	350	*
1	44293706	44294355	650	*
1	44325885	44326750	866	*
1	44327589	44328648	1060	*
1	44354739	44355781	1043	*
1	44378020	44378565	546	*
1	44389871	44390869	999	*
1	44404988	44406923	1936	*
1	44423291	44424358	1068	*
1	44485115	44486412	1298	*
1	44531862	44532792	931	*
1	44553776	44554276	501	*
1	44584110	44584547	438	*
1	44594958	44595647	690	*
1	44631441	44632875	1435	*
1	44652614	44653215	602	*
1	44655520	44655883	364	*
1	44673721	44675046	1326	*
1	44706970	44707510	541	*
1	44714945	44715344	400	*
1	44720992	44722375	1384	*
1	44730448	44731510	1063	*
1	44738148	44738928	781	*
1	44739341	44740308	968	*
1	44775089	44776470	1382	*
1	44786066	44786841	776	*
1	44793506	44794055	550	*
1	44799680	44801075	1396	*
1	44806999	44808793	1795	*
1	44819224	44820681	1458	*
1	44835820	44836237	418	*
1	44842890	44843702	813	*
1	44924567	44925398	832	*
1	44947047	44947895	849	*
1	44968057	44968737	681	*
1	44985700	44986969	1270	*
1	45010531	45013077	2547	*
1	45018649	45019196	548	*
1	45170221	45170653	433	*
1	45179695	45180574	880	*
1	45198107	45198681	575	*
1	45205423	45207058	1636	*
1	45246704	45247200	497	*
1	45266018	45266839	822	*
1	45303254	45304458	1205	*
1	45326565	45328350	1786	*
1	45329415	45329879	465	*
1	45339506	45341199	1694	*
1	45393605	45394454	850	*
1	45410782	45411887	1106	*
1	45442068	45442646	579	*
1	45490520	45491707	1188	*
1	45499523	45500670	1148	*
1	45521345	45523090	1746	*
1	45550403	45551463	1061	*
1	45569876	45570590	715	*
1	45583235	45585181	1947	*
1	45590105	45590622	518	*
1	45686049	45687632	1584	*
1	45750066	45751139	1074	*
1	45802611	45804461	1851	*
1	45840675	45841147	473	*
1	45881570	45882083	514	*
1	45891951	45892854	904	*
1	45954049	45954980	932	*
1	46036902	46037597	696	*
1	46103055	46103567	513	*
1	46132380	46133637	1258	*
1	46134806	46135358	553	*
1	46171132	46172152	1021	*
1	46174323	46175194	872	*
1	46179535	46179792	258	*
1	46182995	46183882	888	*
1	46197856	46199103	1248	*
1	46223475	46223992	518	*
1	46246848	46248661	1814	*
1	46301399	46303447	2049	*
1	46303498	46303967	470	*
1	46333503	46334031	529	*
1	46339249	46341449	2201	*
1	46347884	46348503	620	*
1	46401927	46402601	675	*
1	46406158	46406994	837	*
1	46442225	46443224	1000	*
1	46446873	46447183	311	*
1	46477262	46477791	530	*
1	46489221	46490228	1008	*
1	46516667	46517566	900	*
1	46520066	46521012	947	*
1	46522157	46522935	779	*
1	46527858	46528366	509	*
1	46532919	46533699	781	*
1	46547997	46548386	390	*
1	46603524	46604619	1096	*
1	46616129	46617331	1203	*
1	46643149	46643911	763	*
1	46667599	46668804	1206	*
1	46718537	46719924	1388	*
1	46725052	46725611	560	*
1	46747707	46748047	341	*
1	47013046	47013950	905	*
1	47030379	47031610	1232	*
1	47069066	47069769	704	*
1	47179047	47179828	782	*
1	47189900	47190705	806	*
1	47253872	47254431	560	*
1	47313312	47314616	1305	*
1	47333291	47334916	1626	*
1	47388554	47389277	724	*
1	47424180	47424910	731	*
1	47436472	47438391	1920	*
1	47449931	47450428	498	*
1	47477946	47478629	684	*
1	47487827	47488357	531	*
1	47507885	47508937	1053	*
1	47521048	47521972	925	*
1	47534139	47534906	768	*
1	47569678	47570247	570	*
1	47602255	47602794	540	*
1	47650236	47650738	503	*
1	47684639	47685571	933	*
1	47709380	47710985	1606	*
1	47725986	47726611	626	*
1	47738585	47739198	614	*
1	47758247	47760055	1809	*
1	47763499	47764217	719	*
1	47797541	47798090	550	*
1	47809063	47809904	842	*
1	47871618	47872455	838	*
1	47894547	47895298	752	*
1	47905852	47906942	1091	*
1	47914160	47914907	748	*
1	47926376	47927005	630	*
1	47933298	47933847	550	*
1	47934079	47935173	1095	*
1	47940812	47941237	426	*
1	47941599	47942548	950	*
1	47991146	47991513	368	*
1	47992672	47993203	532	*
1	47996365	47997959	1595	*
1	48007002	48007597	596	*
1	48019612	48020415	804	*
1	48026236	48026767	532	*
1	48047104	48047579	476	*
1	48052148	48053014	867	*
1	48069444	48070847	1404	*
1	48077664	48078342	679	*
1	48080667	48081100	434	*
1	48082237	48082941	705	*
1	48093677	48094489	813	*
1	48105098	48105514	417	*
1	48109366	48109920	555	*
1	48114689	48115459	771	*
1	48186304	48186918	615	*
1	48201953	48202549	597	*
1	48369058	48369996	939	*
1	48471664	48472704	1041	*
1	48494159	48494894	736	*
1	48498142	48498426	285	*
1	48530741	48531121	381	*
1	48572658	48573175	518	*
1	48677330	48677681	352	*
1	48741389	48741920	532	*
1	48807639	48808180	542	*
1	48823171	48823520	350	*
1	48852870	48853587	718	*
1	48859329	48859842	514	*
1	48878182	48879044	863	*
1	48916136	48916532	397	*
1	48931336	48932284	949	*
1	49257100	49257918	819	*
1	50332840	50333535	696	*
1	50348545	50349238	694	*
1	50368295	50368921	627	*
1	50423286	50424057	772	*
1	50873390	50874121	732	*
1	50959273	50960829	1557	*
1	50968039	50969498	1460	*
1	50969582	50970363	782	*
1	50976449	50978587	2139	*
1	50984987	50985607	621	*
1	51063027	51063797	771	*
1	51071925	51072456	532	*
1	51235812	51237380	1569	*
1	51261213	51261842	630	*
1	51264378	51264931	554	*
1	51296513	51297390	878	*
1	51313904	51314733	830	*
1	51331184	51331775	592	*
1	51344654	51345491	838	*
1	51517984	51519642	1659	*
1	51535037	51535432	396	*
1	51558098	51558982	885	*
1	51567438	51568205	768	*
1	51569409	51570304	896	*
1	51616854	51617889	1036	*
1	51622431	51622946	516	*
1	51637009	51637520	512	*
1	51642451	51643250	800	*
1	51648239	51648850	612	*
1	51660665	51661642	978	*
1	51671544	51672380	837	*
1	51699159	51699938	780	*
1	51729136	51730294	1159	*
1	51736706	51737178	473	*
1	51877968	51879388	1421	*
1	51897320	51898726	1407	*
1	51990286	51991093	808	*
1	52002144	52002645	502	*
1	52032381	52034014	1634	*
1	52054852	52055785	934	*
1	52056018	52056983	966	*
1	52127373	52127899	527	*
1	52141671	52143053	1383	*
1	52159394	52159746	353	*
1	52176430	52177295	866	*
1	52296191	52296649	459	*
1	52348677	52349197	521	*
1	52365119	52366672	1554	*
1	52368386	52368752	367	*
1	52403618	52405073	1456	*
1	52552196	52553937	1742	*
1	52574486	52575308	823	*
1	52632873	52633611	739	*
1	52662557	52663277	721	*
1	52697564	52698842	1279	*
1	52702917	52703753	837	*
1	52708250	52708856	607	*
1	52726034	52727459	1426	*
1	52833408	52834059	652	*
1	52842392	52844242	1851	*
1	52921069	52922160	1092	*
1	52926936	52928291	1356	*
1	53014691	53015739	1049	*
1	53112456	53112842	387	*
1	53135349	53136179	831	*
1	53145714	53146808	1095	*
1	53172679	53173178	500	*
1	53185549	53186042	494	*
1	53196249	53197685	1437	*
1	53220062	53221030	969	*
1	53238138	53239143	1006	*
1	53292891	53293553	663	*
1	53325672	53327828	2157	*
1	53327966	53328493	528	*
1	53381725	53382379	655	*
1	53393340	53393859	520	*
1	53412976	53414067	1092	*
1	53444600	53445096	497	*
[truncated: 63,597 more rows]

## Sheet: 24h Hpx siHIF1b
seqnames	start	end	width	strand
1	778300	779308	1009	*
1	827073	827861	789	*
1	869594	870285	692	*
1	906758	907160	403	*
1	910680	911554	875	*
1	925533	925918	386	*
1	938147	938879	733	*
1	943118	943524	407	*
1	959117	959703	587	*
1	960370	961089	720	*
1	966032	967383	1352	*
1	975905	976688	784	*
1	999832	1000934	1103	*
1	1001562	1002131	570	*
1	1005219	1005532	314	*
1	1013230	1014661	1432	*
1	1019384	1019977	594	*
1	1021109	1021756	648	*
1	1024602	1025503	902	*
1	1058825	1060000	1176	*
1	1063847	1064523	677	*
1	1073876	1074583	708	*
1	1079383	1080609	1227	*
1	1115773	1116825	1053	*
1	1121755	1122634	880	*
1	1133358	1133716	359	*
1	1157381	1158657	1277	*
1	1208043	1208704	662	*
1	1231192	1232498	1307	*
1	1243954	1244691	738	*
1	1264780	1265588	809	*
1	1273026	1274753	1728	*
1	1281527	1282448	922	*
1	1290973	1292162	1190	*
1	1304790	1305964	1175	*
1	1318259	1318641	383	*
1	1324292	1325447	1156	*
1	1330667	1331642	976	*
1	1344662	1345863	1202	*
1	1347681	1348273	593	*
1	1360298	1360945	648	*
1	1374661	1375733	1073	*
1	1399065	1400512	1448	*
1	1406886	1407916	1031	*
1	1431778	1432259	482	*
1	1440744	1441577	834	*
1	1471354	1472075	722	*
1	1504746	1505816	1071	*
1	1511365	1512479	1115	*
1	1554588	1555471	884	*
1	1574291	1575483	1193	*
1	1615073	1616782	1710	*
1	1627227	1629046	1820	*
1	1658721	1659553	833	*
1	1686188	1686949	762	*
1	1692292	1693363	1072	*
1	1723988	1724847	860	*
1	1740969	1741464	496	*
1	1758681	1759661	981	*
1	1777901	1779270	1370	*
1	1782689	1783283	595	*
1	1859069	1859673	605	*
1	1890773	1892104	1332	*
1	1906249	1906582	334	*
1	1907110	1907857	748	*
1	1908441	1909474	1034	*
1	1918909	1919995	1087	*
1	1943868	1944500	633	*
1	1959801	1960505	705	*
1	1968938	1969677	740	*
1	2003560	2004100	541	*
1	2014849	2015553	705	*
1	2044817	2045182	366	*
1	2046532	2046773	242	*
1	2049513	2050927	1415	*
1	2104351	2105446	1096	*
1	2132925	2133931	1007	*
1	2139807	2140470	664	*
1	2174258	2174797	540	*
1	2189327	2190604	1278	*
1	2194651	2195719	1069	*
1	2199119	2199764	646	*
1	2207152	2208869	1718	*
1	2212450	2213422	973	*
1	2227476	2228057	582	*
1	2231626	2232159	534	*
1	2234286	2234749	464	*
1	2311383	2311989	607	*
1	2314339	2314801	463	*
1	2322251	2323052	802	*
1	2330812	2331423	612	*
1	2360593	2361514	922	*
1	2372762	2373234	473	*
1	2381514	2382433	920	*
1	2391018	2392284	1267	*
1	2411959	2413532	1574	*
1	2801463	2802142	680	*
1	2821765	2822459	695	*
1	2922051	2922374	324	*
1	3312919	3313692	774	*
1	3319860	3320315	456	*
1	3410184	3410741	558	*
1	3424700	3425134	435	*
1	3453137	3453742	606	*
1	3454067	3455166	1100	*
1	3471223	3472107	885	*
1	3481840	3482848	1009	*
1	3491219	3492123	905	*
1	3503846	3505123	1278	*
1	3509892	3510788	897	*
1	3515935	3516752	818	*
1	3530061	3530745	685	*
1	3530800	3531820	1021	*
1	3542765	3543916	1152	*
1	3547208	3547915	708	*
1	3548021	3548758	738	*
1	3554885	3555571	687	*
1	3610938	3612087	1150	*
1	3618864	3619410	547	*
1	3624259	3625871	1613	*
1	3649766	3650291	526	*
1	3651992	3653156	1165	*
1	3668668	3669394	727	*
1	3746815	3747635	821	*
1	3772061	3773287	1227	*
1	3775947	3776292	346	*
1	3795727	3797013	1287	*
1	3801476	3801787	312	*
1	3811304	3811762	459	*
1	3856589	3858048	1460	*
1	3869644	3870256	613	*
1	3899610	3901642	2033	*
1	3910629	3911302	674	*
1	4585185	4585580	396	*
1	4652583	4653078	496	*
1	5509715	5510237	523	*
1	5745801	5746334	534	*
1	5927960	5928356	397	*
1	5975197	5975648	452	*
1	5991567	5993681	2115	*
1	6001984	6002556	573	*
1	6016217	6016551	335	*
1	6025159	6026695	1537	*
1	6108875	6109555	681	*
1	6111648	6112050	403	*
1	6127525	6128310	786	*
1	6148342	6149029	688	*
1	6157279	6158270	992	*
1	6198924	6199881	958	*
1	6205044	6206801	1758	*
1	6234525	6236354	1830	*
1	6245060	6246218	1159	*
1	6259746	6260683	938	*
1	6261018	6261573	556	*
1	6300246	6301019	774	*
1	6331348	6332054	707	*
1	6342036	6342485	450	*
1	6343313	6344145	833	*
1	6353812	6354537	726	*
1	6363082	6363522	441	*
1	6392653	6394244	1592	*
1	6419602	6420371	770	*
1	6422846	6423133	288	*
1	6440287	6440854	568	*
1	6464440	6464935	496	*
1	6475337	6476073	737	*
1	6488976	6489459	484	*
1	6489894	6491865	1972	*
1	6497153	6497887	735	*
1	6501909	6502634	726	*
1	6523573	6523973	401	*
1	6553817	6554854	1038	*
1	6578166	6578614	449	*
1	6579518	6580556	1039	*
1	6600905	6603741	2837	*
1	6612708	6614551	1844	*
1	6624662	6625989	1328	*
1	6634554	6635052	499	*
1	6701203	6702279	1077	*
1	6720017	6720316	300	*
1	6724555	6725239	685	*
1	6743609	6744155	547	*
1	6770695	6771114	420	*
1	6784231	6785565	1335	*
1	6795376	6796486	1111	*
1	6860032	6860830	799	*
1	6889919	6890237	319	*
1	6935141	6935624	484	*
1	6960307	6960840	534	*
1	6962370	6963941	1572	*
1	6991261	6991687	427	*
1	6998248	6998679	432	*
1	7046309	7046631	323	*
1	7070217	7070810	594	*
1	7117417	7118436	1020	*
1	7121565	7122152	588	*
1	7136181	7136812	632	*
1	7265689	7266484	796	*
1	7299258	7300000	743	*
1	7300866	7301781	916	*
1	7334488	7335931	1444	*
1	7341165	7342059	895	*
1	7379453	7379872	420	*
1	7388747	7390434	1688	*
1	7401751	7402578	828	*
1	7424389	7425062	674	*
1	7469108	7469959	852	*
1	7470714	7471727	1014	*
1	7478915	7479415	501	*
1	7482804	7483177	374	*
1	7526343	7526972	630	*
1	7539598	7540120	523	*
1	7549163	7550565	1403	*
1	7574154	7574960	807	*
1	7645361	7645898	538	*
1	7647258	7647613	356	*
1	7667414	7668107	694	*
1	7680062	7680819	758	*
1	7704412	7705001	590	*
1	7752557	7753162	606	*
1	7770835	7772053	1219	*
1	7783176	7784677	1502	*
1	7810388	7810758	371	*
1	7869460	7869952	493	*
1	7893665	7894752	1088	*
1	7902656	7903107	452	*
1	7940751	7941033	283	*
1	7953780	7954667	888	*
1	7961080	7962143	1064	*
1	7975120	7975655	536	*
1	7982315	7982660	346	*
1	8004397	8005694	1298	*
1	8017534	8017913	380	*
1	8025748	8026871	1124	*
1	8040458	8041014	557	*
1	8047657	8048491	835	*
1	8061211	8062403	1193	*
1	8077126	8077611	486	*
1	8078141	8078698	558	*
1	8091473	8092059	587	*
1	8094435	8094895	461	*
1	8097262	8097826	565	*
1	8116963	8117271	309	*
1	8121047	8121817	771	*
1	8133137	8133590	454	*
1	8133659	8134462	804	*
1	8137643	8138232	590	*
1	8154636	8155048	413	*
1	8174188	8174719	532	*
1	8174849	8175225	377	*
1	8182095	8182844	750	*
1	8197596	8198340	745	*
1	8201305	8201807	503	*
1	8202147	8202896	750	*
1	8204218	8204790	573	*
1	8211734	8212513	780	*
1	8259128	8260183	1056	*
1	8293196	8293537	342	*
1	8314319	8314834	516	*
1	8317917	8318450	534	*
1	8343116	8344168	1053	*
1	8348851	8349318	468	*
1	8374818	8375146	329	*
1	8396895	8397351	457	*
1	8412143	8412704	562	*
1	8423290	8424813	1524	*
1	8438969	8439819	851	*
1	8525390	8526319	930	*
1	8625949	8627112	1164	*
1	8661459	8662236	778	*
1	8701039	8701793	755	*
1	8702944	8703818	875	*
1	8712173	8713238	1066	*
1	8726453	8727081	629	*
1	8733390	8734034	645	*
1	8816921	8818284	1364	*
1	8822652	8823097	446	*
1	8848698	8849593	896	*
1	8858081	8858574	494	*
1	8873548	8873968	421	*
1	8877939	8879537	1599	*
1	8880132	8880444	313	*
1	8889298	8890967	1670	*
1	8903582	8904543	962	*
1	8918018	8918462	445	*
1	8939443	8940018	576	*
1	8962926	8963393	468	*
1	8986028	8986661	634	*
1	9004859	9005454	596	*
1	9067185	9067534	350	*
1	9078302	9079372	1071	*
1	9080528	9081287	760	*
1	9084861	9085462	602	*
1	9101549	9101934	386	*
1	9110528	9111332	805	*
1	9128086	9129959	1874	*
1	9145072	9145613	542	*
1	9162858	9164528	1671	*
1	9181106	9181817	712	*
1	9181945	9183172	1228	*
1	9201480	9202193	714	*
1	9234209	9235455	1247	*
1	9266975	9267582	608	*
1	9270500	9270973	474	*
1	9275549	9276045	497	*
1	9280375	9280962	588	*
1	9290116	9290794	679	*
1	9291940	9293318	1379	*
1	9300065	9300616	552	*
1	9302765	9303535	771	*
1	9315470	9316476	1007	*
1	9317637	9318235	599	*
1	9321238	9321908	671	*
1	9350068	9350987	920	*
1	9376530	9377369	840	*
1	9384555	9385321	767	*
1	9388513	9389179	667	*
1	9397988	9398429	442	*
1	9400438	9400991	554	*
1	9401780	9402346	567	*
1	9412935	9414122	1188	*
1	9428670	9429509	840	*
1	9438532	9439096	565	*
1	9455796	9456303	508	*
1	9472833	9473594	762	*
1	9491069	9491402	334	*
1	9494950	9495753	804	*
1	9539100	9540428	1329	*
1	9561521	9561879	359	*
1	9588294	9589204	911	*
1	9615364	9615903	540	*
1	9626921	9627540	620	*
1	9687267	9688113	847	*
1	9688973	9689856	884	*
1	9718972	9719783	812	*
1	9724847	9725385	539	*
1	9792233	9792884	652	*
1	9798117	9798810	694	*
1	9822991	9823515	525	*
1	9823588	9824735	1148	*
1	9825082	9826009	928	*
1	9842665	9843438	774	*
1	9867296	9867950	655	*
1	9890214	9890830	617	*
1	9909670	9911277	1608	*
1	9942479	9943672	1194	*
1	9950316	9950814	499	*
1	9960791	9961582	792	*
1	9996933	9997872	940	*
1	10032465	10033843	1379	*
1	10055708	10056126	419	*
1	10074102	10074775	674	*
1	10108050	10108775	726	*
1	10122912	10123414	503	*
1	10195562	10196009	448	*
1	10209782	10212079	2298	*
1	10338087	10338413	327	*
1	10339841	10340124	284	*
1	10377406	10377854	449	*
1	10387447	10388325	879	*
1	10398368	10399956	1589	*
1	10415203	10415748	546	*
1	10430211	10431338	1128	*
1	10459101	10459580	480	*
1	10471848	10472803	956	*
1	10474734	10475520	787	*
1	10494474	10495032	559	*
1	10507398	10507817	420	*
1	10510453	10511200	748	*
1	10528056	10529444	1389	*
1	10575697	10575998	302	*
1	10599126	10599919	794	*
1	10634700	10635893	1194	*
1	10694344	10695294	951	*
1	10730967	10731431	465	*
1	10755816	10756632	817	*
1	10779209	10779601	393	*
1	10788605	10789085	481	*
1	10796169	10796914	746	*
1	10824797	10825286	490	*
1	10835875	10836344	470	*
1	10837206	10837778	573	*
1	10866814	10867666	853	*
1	10900637	10901771	1135	*
1	10909936	10910440	505	*
1	10960824	10961555	732	*
1	10973516	10973966	451	*
1	10975710	10976071	362	*
1	10980030	10980506	477	*
1	10990109	10990576	468	*
1	11012140	11013428	1289	*
1	11037606	11038062	457	*
1	11059115	11060598	1484	*
1	11099196	11100224	1029	*
1	11134085	11135229	1145	*
1	11178056	11178769	714	*
1	11180229	11180787	559	*
1	11241702	11242233	532	*
1	11262144	11263029	886	*
1	11272715	11274068	1354	*
1	11281574	11282613	1040	*
1	11292515	11293204	690	*
1	11293858	11294224	367	*
1	11337516	11337842	327	*
1	11478600	11479534	935	*
1	11645784	11646225	442	*
1	11653092	11653681	590	*
1	11654214	11655182	969	*
1	11663921	11664602	682	*
1	11680481	11681906	1426	*
1	11692847	11693672	826	*
1	11733316	11733753	438	*
1	11735714	11736759	1046	*
1	11748991	11749517	527	*
1	11785048	11785631	584	*
1	11787354	11787984	631	*
1	11790739	11791450	712	*
1	11803370	11803890	521	*
1	11805172	11806532	1361	*
1	11821319	11822018	700	*
1	11838448	11839004	557	*
1	11859207	11859559	353	*
1	11882900	11883234	335	*
1	11893780	11894289	510	*
1	11901381	11901865	485	*
1	11908097	11909240	1144	*
1	11909302	11909954	653	*
1	11918648	11919490	843	*
1	11926276	11926791	516	*
1	11929889	11930175	287	*
1	11934238	11935148	911	*
1	11939001	11939621	621	*
1	11940580	11940968	389	*
1	11966757	11967533	777	*
1	11979542	11980785	1244	*
1	12001943	12002601	659	*
1	12019061	12020391	1331	*
1	12030944	12031594	651	*
1	12040393	12041049	657	*
1	12044141	12044630	490	*
1	12051905	12052560	656	*
1	12075607	12076073	467	*
1	12132048	12132595	548	*
1	12132890	12133522	633	*
1	12135674	12135988	315	*
1	12143376	12144184	809	*
1	12153090	12153826	737	*
1	12161569	12162475	907	*
1	12166791	12167321	531	*
1	12208680	12209381	702	*
1	12229747	12231397	1651	*
1	12271858	12272465	608	*
1	12454502	12455475	974	*
1	12477993	12478893	901	*
1	12480785	12481129	345	*
1	12518878	12519359	482	*
1	12539813	12540843	1031	*
1	12548907	12550340	1434	*
1	12556297	12556895	599	*
1	12572607	12574416	1810	*
1	12580039	12580657	619	*
1	12588146	12588773	628	*
1	12595185	12596861	1677	*
1	12601848	12602442	595	*
1	12604195	12604749	555	*
1	12615964	12616879	916	*
1	12617969	12619578	1610	*
1	12636244	12637219	976	*
1	12658960	12659361	402	*
1	12760433	12760741	309	*
1	12851651	12852253	603	*
1	13748780	13750097	1318	*
1	13766836	13767445	610	*
1	13960386	13960794	409	*
1	13965732	13966332	601	*
1	14055301	14056153	853	*
1	14108713	14109454	742	*
1	14113137	14113866	730	*
1	14140717	14141400	684	*
1	14190451	14190951	501	*
1	14282628	14283191	564	*
1	14291106	14291748	643	*
1	14320570	14320962	393	*
1	14332179	14332722	544	*
1	14339876	14340810	935	*
1	14345987	14346648	662	*
1	14360935	14361408	474	*
1	14366255	14366865	611	*
1	14413790	14414249	460	*
1	14486323	14487275	953	*
1	14517051	14518005	955	*
1	14522327	14523259	933	*
1	14597994	14599154	1161	*
1	14625742	14626272	531	*
1	14653532	14654142	611	*
1	14742134	14742934	801	*
1	14765596	14766373	778	*
1	14810685	14811461	777	*
1	14814950	14815833	884	*
1	14822425	14822981	557	*
1	14894776	14895384	609	*
1	14910983	14911781	799	*
1	14923719	14925036	1318	*
1	14929481	14930135	655	*
1	14945232	14945924	693	*
1	14946886	14947443	558	*
1	14954067	14954619	553	*
1	14968258	14969065	808	*
1	14980833	14981166	334	*
1	14988016	14988585	570	*
1	14996015	14997069	1055	*
1	15003109	15003802	694	*
1	15014421	15014958	538	*
1	15027617	15028524	908	*
1	15046439	15047038	600	*
1	15056850	15057265	416	*
1	15089229	15089803	575	*
1	15090337	15090797	461	*
1	15100066	15100760	695	*
1	15128519	15128884	366	*
1	15152351	15154361	2011	*
1	15178723	15179532	810	*
1	15200415	15201073	659	*
1	15247004	15247719	716	*
1	15261226	15261774	549	*
1	15272367	15272920	554	*
1	15304668	15305093	426	*
1	15323155	15324069	915	*
1	15337475	15338431	957	*
1	15345896	15346281	386	*
1	15352310	15352829	520	*
1	15356121	15357267	1147	*
1	15409352	15410476	1125	*
1	15415991	15416674	684	*
1	15426615	15427169	555	*
1	15459744	15460325	582	*
1	15501439	15501765	327	*
1	15523870	15525478	1609	*
1	15526399	15527307	909	*
1	15584351	15585392	1042	*
1	15603059	15604001	943	*
1	15616785	15618235	1451	*
1	15678572	15678951	380	*
1	15680761	15681600	840	*
1	15684113	15684426	314	*
1	15741221	15741898	678	*
1	15758607	15759631	1025	*
1	15786624	15787040	417	*
1	15788105	15788577	473	*
1	15795104	15795517	414	*
1	15796599	15797213	615	*
1	15799032	15799803	772	*
1	15799934	15801453	1520	*
1	15815437	15815886	450	*
1	15825433	15826203	771	*
1	15833138	15833624	487	*
1	15834319	15836436	2118	*
1	15847176	15848397	1222	*
1	15849252	15850287	1036	*
1	15886111	15886844	734	*
1	15916468	15916847	380	*
1	15919350	15919693	344	*
1	15923263	15923599	337	*
1	15924584	15925220	637	*
1	15949078	15950251	1174	*
1	15952420	15953097	678	*
1	15975307	15976322	1016	*
1	15994374	15994895	522	*
1	16006899	16007460	562	*
1	16012645	16013775	1131	*
1	16015985	16016573	589	*
1	16032563	16033271	709	*
1	16038484	16038876	393	*
1	16048545	16049132	588	*
1	16055595	16056419	825	*
1	16068401	16068714	314	*
1	16073494	16074017	524	*
1	16075998	16076606	609	*
1	16076643	16077252	610	*
1	16078981	16079367	387	*
1	16082193	16082830	638	*
1	16112850	16113455	606	*
1	16139019	16140147	1129	*
1	16143789	16144324	536	*
1	16144988	16147164	2177	*
1	16154765	16155325	561	*
1	16155582	16156449	868	*
1	16164167	16164725	559	*
1	16167319	16168151	833	*
1	16173018	16173939	922	*
1	16175572	16176242	671	*
1	16181611	16182641	1031	*
1	16187624	16188208	585	*
1	16188956	16189381	426	*
1	16206197	16207334	1138	*
1	16217008	16217917	910	*
1	16236110	16237757	1648	*
1	16248684	16249142	459	*
1	16249872	16250253	382	*
1	16254401	16254956	556	*
1	16324379	16324811	433	*
1	16351874	16353095	1222	*
1	16366912	16368069	1158	*
1	16375366	16376234	869	*
1	16386170	16387148	979	*
1	16440157	16441546	1390	*
1	16498673	16500216	1544	*
1	16513462	16514603	1142	*
1	16534670	16535763	1094	*
1	16612626	16614056	1431	*
1	16621026	16621379	354	*
1	16623907	16624499	593	*
1	16624975	16625230	256	*
1	16643698	16645208	1511	*
1	16677788	16678452	665	*
1	16707294	16708096	803	*
1	16727185	16728024	840	*
1	16872521	16873302	782	*
1	16888830	16889957	1128	*
1	16895356	16897010	1655	*
1	16903852	16904374	523	*
1	16904522	16905719	1198	*
1	16913554	16914671	1118	*
1	16948187	16949368	1182	*
1	16960555	16961284	730	*
1	16967007	16967892	886	*
1	16971788	16972348	561	*
1	16979898	16981140	1243	*
1	17003647	17004584	938	*
1	17010676	17012322	1647	*
1	17027406	17027954	549	*
1	17053713	17054611	899	*
1	17059605	17060025	421	*
1	17113643	17114367	725	*
1	17119243	17119666	424	*
1	17121311	17121728	418	*
1	17125724	17126119	396	*
1	17128288	17129065	778	*
1	17162770	17163317	548	*
1	17167993	17168865	873	*
1	17169341	17169749	409	*
1	17186242	17186938	697	*
1	17189917	17190558	642	*
1	17191254	17191732	479	*
1	17207751	17208446	696	*
1	17211950	17213166	1217	*
1	17226331	17226826	496	*
1	17232933	17234179	1247	*
1	17236870	17237602	733	*
1	17250433	17251158	726	*
1	17251562	17252112	551	*
1	17276480	17277119	640	*
1	17287356	17287879	524	*
1	17289659	17290224	566	*
1	17335924	17336423	500	*
1	17405997	17406528	532	*
1	17437663	17438784	1122	*
1	17439658	17440134	477	*
1	17460096	17460993	898	*
1	17475715	17476285	571	*
1	17487829	17488176	348	*
1	17494131	17494806	676	*
1	17502211	17502834	624	*
1	17531512	17532555	1044	*
1	17539529	17540969	1441	*
1	17551033	17552342	1310	*
1	17561291	17562055	765	*
1	17563948	17564263	316	*
1	17569111	17570281	1171	*
1	17587635	17588833	1199	*
1	17606809	17607184	376	*
1	17624248	17625409	1162	*
1	17653680	17654145	466	*
1	17696404	17696796	393	*
1	17765480	17766416	937	*
1	17768493	17769325	833	*
1	17826019	17826573	555	*
1	17858062	17858446	385	*
1	17866365	17866887	523	*
1	17874198	17874860	663	*
1	18022018	18022657	640	*
1	18092026	18092410	385	*
1	18234776	18235135	360	*
1	18597236	18597757	522	*
1	18618512	18619022	511	*
1	18668821	18669140	320	*
1	18820733	18821155	423	*
1	18875101	18875792	692	*
1	18884139	18884503	365	*
1	18901986	18903327	1342	*
1	18912956	18913541	586	*
1	18922187	18922853	667	*
1	18926383	18927002	620	*
1	18941079	18942099	1021	*
1	18949544	18950360	817	*
1	18955523	18957380	1858	*
1	19009759	19010347	589	*
1	19010431	19011511	1081	*
1	19033840	19034473	634	*
1	19045286	19045839	554	*
1	19054318	19054646	329	*
1	19066168	19066675	508	*
1	19066932	19067860	929	*
1	19096259	19096764	506	*
1	19113646	19114041	396	*
1	19203355	19203810	456	*
1	19209548	19211145	1598	*
1	19241284	19241732	449	*
1	19251367	19252214	848	*
1	19288376	19289441	1066	*
1	19311124	19313054	1931	*
1	19344393	19344982	590	*
1	19430165	19430642	478	*
1	19440443	19440896	454	*
1	19450645	19451469	825	*
1	19469458	19469851	394	*
1	19484425	19486302	1878	*
1	19582284	19582604	321	*
1	19596349	19597814	1466	*
1	19635714	19636072	359	*
1	19643160	19645314	2155	*
1	19650916	19651483	568	*
1	19653557	19654121	565	*
1	19659673	19660083	411	*
1	19704369	19705043	675	*
1	19715516	19716102	587	*
1	19754439	19754893	455	*
1	19758203	19758880	678	*
1	19765430	19766057	628	*
1	19799260	19800595	1336	*
1	19861012	19861603	592	*
1	19863789	19864232	444	*
1	19866756	19867171	416	*
1	19882060	19883137	1078	*
1	20100759	20101309	551	*
1	20124442	20124917	476	*
1	20152014	20152729	716	*
1	20195212	20195530	319	*
1	20212969	20213386	418	*
1	20279493	20279926	434	*
1	20358657	20359211	555	*
1	20411171	20411683	513	*
1	20430396	20430799	404	*
1	20440797	20441109	313	*
1	20476292	20476801	510	*
1	20485455	20487012	1558	*
1	20493777	20494418	642	*
1	20507397	20508411	1015	*
1	20522325	20522879	555	*
1	20530925	20531415	491	*
1	20552323	20552852	530	*
1	20575219	20576052	834	*
1	20576121	20576920	800	*
1	20588595	20590043	1449	*
1	20601255	20602041	787	*
1	20604179	20604754	576	*
1	20612095	20612780	686	*
1	20613507	20614288	782	*
1	20633256	20634448	1193	*
1	20634503	20635014	512	*
1	20639903	20640655	753	*
1	20661233	20662038	806	*
1	20696392	20697360	969	*
1	20717430	20718412	983	*
1	20731822	20733675	1854	*
1	20786093	20787841	1749	*
1	20847335	20848660	1326	*
1	20896768	20897336	569	*
1	21022162	21022917	756	*
1	21083279	21083686	408	*
1	21091104	21091490	387	*
1	21149432	21150323	892	*
1	21175702	21177437	1736	*
1	21194955	21195697	743	*
1	21255206	21255653	448	*
1	21261624	21263064	1441	*
1	21289541	21290812	1272	*
1	21302645	21303514	870	*
1	21308753	21309659	907	*
1	21317043	21317907	865	*
1	21318621	21319074	454	*
1	21324223	21325124	902	*
1	21331876	21332555	680	*
1	21335786	21336211	426	*
1	21337922	21339612	1691	*
1	21344665	21346061	1397	*
1	21355940	21356369	430	*
1	21368262	21369085	824	*
1	21370570	21371071	502	*
1	21378965	21379549	585	*
1	21439739	21440474	736	*
1	21490728	21491166	439	*
1	21508925	21509478	554	*
1	21574079	21575158	1080	*
1	21586700	21587512	813	*
1	21594563	21594991	429	*
1	21607522	21608313	792	*
1	21626819	21627415	597	*
1	21631888	21632536	649	*
1	21638618	21639337	720	*
1	21651211	21652065	855	*
1	21659120	21659722	603	*
1	21669215	21670047	833	*
1	21764393	21765599	1207	*
1	21782205	21783932	1728	*
1	21801072	21801482	411	*
1	21818710	21819029	320	*
1	21861954	21862519	566	*
1	21869609	21870469	861	*
1	21909307	21910426	1120	*
1	21920135	21921030	896	*
1	21927483	21927967	485	*
1	21930954	21931903	950	*
1	21937122	21937714	593	*
1	21942944	21943473	530	*
1	21956546	21957392	847	*
1	21963847	21964376	530	*
1	22019049	22019527	479	*
1	22025098	22026305	1208	*
1	22039643	22040312	670	*
1	22052405	22053796	1392	*
1	22131761	22132951	1191	*
1	22143108	22143890	783	*
1	22275755	22276224	470	*
1	22332849	22333509	661	*
1	22341952	22342557	606	*
1	22388675	22389873	1199	*
1	22414179	22414758	580	*
1	22416593	22416941	349	*
1	22420346	22420839	494	*
1	22428596	22429409	814	*
1	22451629	22452844	1216	*
1	22600429	22601090	662	*
1	22641859	22642383	525	*
1	22689489	22689933	445	*
1	22704456	22704915	460	*
1	22739528	22740288	761	*
1	22746029	22746628	600	*
1	22750158	22750698	541	*
1	22780723	22781073	351	*
1	22831797	22832620	824	*
1	22870282	22870962	681	*
1	22930209	22930727	519	*
1	22969254	22969790	537	*
1	22976361	22976966	606	*
1	23010469	23011293	825	*
1	23019156	23020387	1232	*
1	23167294	23169066	1773	*
1	23177365	23178175	811	*
1	23188386	23189386	1001	*
1	23194464	23195283	820	*
1	23196703	23197366	664	*
1	23198313	23198752	440	*
1	23216741	23217897	1157	*
1	23224682	23225539	858	*
1	23273312	23273776	465	*
1	23282852	23283386	535	*
1	23343566	23345092	1527	*
1	23367640	23369465	1826	*
1	23402969	23403266	298	*
1	23403589	23404418	830	*
1	23411616	23412197	582	*
1	23423681	23425245	1565	*
1	23451860	23452599	740	*
1	23478809	23479383	575	*
1	23483773	23484960	1188	*
1	23496910	23497604	695	*
1	23528176	23528923	748	*
1	23530555	23531765	1211	*
1	23539592	23540362	771	*
1	23544693	23545258	566	*
1	23554546	23555295	750	*
1	23555954	23557148	1195	*
1	23559156	23559807	652	*
1	23562158	23562659	502	*
1	23576995	23577926	932	*
1	23585305	23586147	843	*
1	23591520	23592086	567	*
1	23593509	23594154	646	*
1	23619369	23620029	661	*
1	23634682	23635798	1117	*
1	23637335	23637799	465	*
1	23651015	23651703	689	*
1	23657685	23658025	341	*
1	23691449	23692359	911	*
1	23718481	23718873	393	*
1	23742984	23744232	1249	*
1	23751153	23751649	497	*
1	23771920	23772609	690	*
1	23777884	23778816	933	*
1	23779739	23780349	611	*
1	23790146	23790431	286	*
1	23790730	23791448	719	*
1	23799369	23801121	1753	*
1	23809679	23810138	460	*
1	23824993	23825749	757	*
1	23838116	23838876	761	*
1	23854571	23854969	399	*
1	23867595	23868782	1188	*
1	23907629	23908201	573	*
1	23916809	23917292	484	*
1	23919861	23920529	669	*
1	23951458	23952245	788	*
1	23958949	23960220	1272	*
1	23979826	23981072	1247	*
1	24003314	24003879	566	*
1	24008431	24008917	487	*
1	24009254	24009811	558	*
1	24018565	24019273	709	*
1	24022460	24023189	730	*
1	24045928	24046821	894	*
1	24047026	24047492	467	*
1	24070804	24071381	578	*
1	24107847	24108200	354	*
1	24108361	24109308	948	*
1	24112526	24112893	368	*
1	24117630	24118146	517	*
1	24119798	24120816	1019	*
1	24142521	24143467	947	*
1	24149829	24150938	1110	*
1	24187010	24187831	822	*
1	24191887	24192347	461	*
1	24201952	24202532	581	*
1	24236190	24237215	1026	*
1	24266225	24267057	833	*
1	24283558	24284404	847	*
1	24289731	24290503	773	*
1	24294270	24295408	1139	*
1	24321572	24322655	1084	*
1	24352002	24352687	686	*
1	24362977	24363403	427	*
1	24364559	24364942	384	*
1	24365157	24365740	584	*
1	24391315	24391608	294	*
1	24392283	24392671	389	*
1	24413315	24413964	650	*
1	24415302	24416321	1020	*
1	24502078	24503458	1381	*
1	24515557	24516020	464	*
1	24541036	24541355	320	*
1	24559043	24559721	679	*
1	24587255	24587548	294	*
1	24635195	24635545	351	*
1	24642425	24644241	1817	*
1	24683507	24684169	663	*
1	24688553	24689100	548	*
1	24705167	24705958	792	*
1	24713043	24713842	800	*
1	24744804	24746072	1269	*
1	24770178	24770582	405	*
1	24830690	24831041	352	*
1	24847800	24848873	1074	*
1	24862060	24862935	876	*
1	24898122	24898481	360	*
1	24929405	24930713	1309	*
1	24932211	24932616	406	*
1	24949264	24949717	454	*
1	25017396	25017975	580	*
1	25022128	25023279	1152	*
1	25031849	25032670	822	*
1	25101442	25101820	379	*
1	25232006	25232938	933	*
1	25233101	25233546	446	*
1	25239568	25240499	932	*
1	25246997	25248144	1148	*
1	25267739	25268346	608	*
1	25338070	25339035	966	*
1	25352103	25352627	525	*
1	25371495	25372263	769	*
1	25429892	25431567	1676	*
1	25503831	25504123	293	*
1	25506641	25507273	633	*
1	25523426	25523883	458	*
1	25543258	25544216	959	*
1	25544474	25545117	644	*
1	25549441	25550050	610	*
1	25556518	25557318	801	*
1	25568357	25569293	937	*
1	25608454	25608924	471	*
1	25615950	25617224	1275	*
1	25688390	25689168	779	*
1	25695033	25695482	450	*
1	25727638	25727975	338	*
1	25743448	25744528	1081	*
1	25799806	25800894	1089	*
1	25810709	25811331	623	*
1	25819567	25821112	1546	*
1	25858630	25859890	1261	*
1	25874892	25876228	1337	*
1	25890343	25890895	553	*
1	25892259	25892925	667	*
1	25895371	25895736	366	*
1	25905377	25907177	1801	*
1	25922712	25923479	768	*
1	25997653	25998704	1052	*
1	26034928	26036651	1724	*
1	26110734	26112681	1948	*
1	26145037	26145760	724	*
1	26161569	26162300	732	*
1	26169580	26170456	877	*
1	26177100	26177739	640	*
1	26218932	26219677	746	*
1	26233605	26234930	1326	*
1	26279568	26280688	1121	*
1	26284741	26285313	573	*
1	26306017	26307129	1113	*
1	26321153	26321935	783	*
1	26336118	26337015	898	*
1	26358785	26359198	414	*
1	26377942	26378846	905	*
1	26387308	26387709	402	*
1	26391457	26391813	357	*
1	26416992	26417411	420	*
1	26431885	26432752	868	*
1	26471471	26473363	1893	*
1	26500064	26501732	1669	*
1	26529424	26530858	1435	*
1	26530969	26531600	632	*
1	26620073	26621703	1631	*
1	26636511	26637181	671	*
1	26677405	26678035	631	*
1	26692242	26693370	1129	*
1	26695336	26696363	1028	*
1	26697905	26698463	559	*
1	26705526	26706289	764	*
1	26723305	26724036	732	*
1	26771325	26772281	957	*
1	26787544	26788717	1174	*
1	26826129	26827620	1492	*
1	26848827	26849854	1028	*
1	26853122	26853431	310	*
1	26862849	26863545	697	*
1	26864582	26865663	1082	*
1	26889594	26890690	1097	*
1	26899806	26900664	859	*
1	26907351	26907995	645	*
1	26921234	26922410	1177	*
1	26966887	26967269	383	*
1	26993236	26994443	1208	*
1	26997687	26998111	425	*
1	26999392	26999981	590	*
1	27009489	27010242	754	*
1	27010845	27011392	548	*
1	27012714	27013406	693	*
1	27031268	27031995	728	*
1	27044513	27045087	575	*
1	27097428	27097729	302	*
1	27099120	27100212	1093	*
1	27102720	27103051	332	*
1	27111895	27112505	611	*
1	27122486	27123076	591	*
1	27154618	27155627	1010	*
1	27192041	27193104	1064	*
1	27197801	27198426	626	*
1	27233985	27235659	1675	*
1	27284702	27285051	350	*
1	27296719	27297104	386	*
1	27300597	27301336	740	*
1	27306839	27307430	592	*
1	27321831	27322774	944	*
1	27349193	27350357	1165	*
1	27365416	27367392	1977	*
1	27392189	27392983	795	*
1	27436534	27436914	381	*
1	27489636	27490925	1290	*
1	27528154	27529395	1242	*
1	27538805	27539077	273	*
1	27540215	27540908	694	*
1	27542269	27543180	912	*
1	27556849	27558352	1504	*
1	27568171	27569333	1163	*
1	27575225	27576257	1033	*
1	27589628	27590521	894	*
1	27590995	27591580	586	*
1	27603654	27604509	856	*
1	27643729	27644266	538	*
1	27650582	27651208	627	*
1	27658869	27660367	1499	*
1	27663155	27663503	349	*
1	27671887	27672940	1054	*
1	27686459	27687055	597	*
1	27725363	27726643	1281	*
1	27772800	27773968	1169	*
1	27817117	27817643	527	*
1	27830343	27831458	1116	*
1	27857856	27858768	913	*
1	27872195	27872886	692	*
1	27875135	27875665	531	*
1	27914103	27915049	947	*
1	27934779	27935327	549	*
1	27959359	27960478	1120	*
1	27979653	27980104	452	*
1	28087745	28089155	1411	*
1	28105044	28105564	521	*
1	28153106	28153502	397	*
1	28208898	28209260	363	*
1	28232414	28233160	747	*
1	28235583	28236791	1209	*
1	28247110	28247615	506	*
1	28249478	28249815	338	*
1	28259136	28260667	1532	*
1	28296701	28297217	517	*
1	28313795	28314459	665	*
1	28328644	28329438	795	*
1	28346158	28346702	545	*
1	28351585	28352276	692	*
1	28354105	28354544	440	*
1	28369390	28370631	1242	*
1	28391807	28392560	754	*
1	28409781	28410204	424	*
1	28417383	28417979	597	*
1	28437253	28438491	1239	*
1	28449905	28450442	538	*
1	28471518	28471995	478	*
1	28505643	28506697	1055	*
1	28517840	28519347	1508	*
1	28552559	28553971	1413	*
1	28581067	28582341	1275	*
1	28591848	28593142	1295	*
1	28594672	28595185	514	*
1	28601613	28602307	695	*
1	28642309	28643556	1248	*
1	28648028	28648453	426	*
1	28648526	28649373	848	*
1	28668208	28669793	1586	*
1	28736318	28738082	1765	*
1	28785117	28785782	666	*
1	28846269	28846590	322	*
1	28859866	28861125	1260	*
1	28865857	28866294	438	*
1	28877118	28877567	450	*
1	28882025	28882524	500	*
1	28884769	28885365	597	*
1	28886777	28888491	1715	*
1	28914072	28915561	1490	*
1	28972073	28972840	768	*
1	29122091	29123352	1262	*
1	29124230	29125109	880	*
1	29133625	29134557	933	*
1	29181062	29182351	1290	*
1	29197342	29197869	528	*
1	29202693	29203419	727	*
1	29230538	29231331	794	*
1	29236140	29236856	717	*
1	29245799	29246309	511	*
1	29257046	29257858	813	*
1	29271591	29272247	657	*
1	29282969	29283793	825	*
1	29415212	29415711	500	*
1	29453465	29453879	415	*
1	29513340	29513801	462	*
1	29569848	29570720	873	*
1	29584708	29585317	610	*
1	29640083	29640510	428	*
1	29649414	29650203	790	*
1	29697991	29698544	554	*
1	29703595	29703905	311	*
1	29706991	29707305	315	*
1	29708911	29710097	1187	*
1	29974209	29974824	616	*
1	30083744	30084465	722	*
1	30106158	30106488	331	*
1	30191137	30191769	633	*
1	30525811	30526497	687	*
1	30657595	30658245	651	*
1	30707975	30708430	456	*
1	30717915	30719593	1679	*
1	30779606	30779936	331	*
1	30782428	30782829	402	*
1	30801575	30802245	671	*
1	30807244	30807818	575	*
1	30816328	30816988	661	*
1	30823705	30824878	1174	*
1	30854151	30854476	326	*
1	30909928	30910382	455	*
1	30911207	30911867	661	*
1	30929242	30930125	884	*
1	30966688	30967353	666	*
1	30977015	30977599	585	*
1	31065076	31066218	1143	*
1	31111214	31111772	559	*
1	31135737	31136636	900	*
1	31154606	31155890	1285	*
1	31162531	31163041	511	*
1	31170568	31171375	808	*
1	31181469	31182781	1313	*
1	31238860	31240183	1324	*
1	31296371	31297864	1494	*
1	31372953	31374086	1134	*
1	31394522	31395254	733	*
1	31412976	31414276	1301	*
1	31422454	31423074	621	*
1	31482709	31484009	1301	*
1	31497541	31497992	452	*
1	31520723	31521314	592	*
1	31523757	31524117	361	*
1	31530871	31531838	968	*
1	31548651	31550192	1542	*
1	31573787	31574484	698	*
1	31575526	31576781	1256	*
1	31583906	31584502	597	*
1	31587800	31588408	609	*
1	31588558	31589252	695	*
1	31591710	31592149	440	*
1	31593884	31594333	450	*
1	31644315	31645459	1145	*
1	31666198	31666927	730	*
1	31669599	31670609	1011	*
1	31689525	31690302	778	*
1	31700775	31701937	1163	*
1	31712475	31713119	645	*
1	31714659	31715885	1227	*
1	31736590	31737348	759	*
1	31745395	31746717	1323	*
1	31753747	31754361	615	*
1	31762618	31763418	801	*
1	31769538	31770432	895	*
1	31775463	31775998	536	*
1	31788140	31789741	1602	*
1	31798345	31799408	1064	*
1	31815739	31816279	541	*
1	31897414	31898272	859	*
1	31937383	31937988	606	*
1	31938214	31938889	676	*
1	31939630	31940201	572	*
1	31944242	31945132	891	*
1	31954426	31955490	1065	*
1	31956007	31956518	512	*
1	31963956	31964651	696	*
1	31977675	31978136	462	*
1	32003552	32003902	351	*
1	32013226	32014983	1758	*
1	32062287	32063171	885	*
1	32066331	32066840	510	*
1	32072472	32073659	1188	*
1	32100991	32101837	847	*
1	32107783	32108894	1112	*
1	32133206	32133957	752	*
1	32142749	32143139	391	*
1	32179222	32180271	1050	*
1	32180330	32180837	508	*
1	32200201	32201317	1117	*
1	32205354	32206406	1053	*
1	32215463	32216125	663	*
1	32221839	32222935	1097	*
1	32235841	32236570	730	*
1	32240193	32241810	1618	*
1	32246783	32247551	769	*
1	32248169	32248745	577	*
1	32291637	32292823	1187	*
1	32335037	32336607	1571	*
1	32351071	32352359	1289	*
1	32393892	32395201	1310	*
1	32400831	32401491	661	*
1	32413786	32414301	516	*
1	32448340	32448893	554	*
1	32500278	32501237	960	*
1	32520452	32521116	665	*
1	32539012	32540371	1360	*
1	32611940	32612731	792	*
1	32650194	32651820	1627	*
1	32701932	32704269	2338	*
1	32712157	32712696	540	*
1	32716584	32717171	588	*
1	32724573	32725752	1180	*
1	32741146	32741929	784	*
1	32760004	32760676	673	*
1	32760980	32761938	959	*
1	32769512	32770093	582	*
1	32772957	32773526	570	*
1	32775209	32775974	766	*
1	32789291	32789883	593	*
1	32795452	32796180	729	*
1	32816715	32818579	1865	*
1	32872671	32872977	307	*
1	32876591	32877011	421	*
1	32878264	32878845	582	*
1	32892787	32893848	1062	*
1	32901046	32901860	815	*
1	32948900	32949255	356	*
1	32963724	32965158	1435	*
1	32981033	32981769	737	*
1	32988785	32989600	816	*
1	32992342	32993064	723	*
1	33007190	33007848	659	*
1	33036012	33037249	1238	*
1	33050142	33050863	722	*
1	33055151	33055895	745	*
1	33060466	33061249	784	*
1	33072483	33073116	634	*
1	33080817	33081630	814	*
1	33086295	33086902	608	*
1	33099180	33099969	790	*
1	33119887	33120264	378	*
1	33126924	33127663	740	*
1	33152877	33153473	597	*
1	33180575	33182309	1735	*
1	33218747	33219035	289	*
1	33220858	33221477	620	*
1	33255420	33256226	807	*
1	33295454	33295827	374	*
1	33298522	33299061	540	*
1	33306451	33307575	1125	*
1	33349125	33350668	1544	*
1	33367592	33368273	682	*
1	33430308	33431514	1207	*
1	33443774	33444153	380	*
1	33455788	33456180	393	*
1	33458577	33459011	435	*
1	33470518	33470845	328	*
1	33472153	33473025	873	*
1	33612728	33613230	503	*
1	33633120	33633557	438	*
1	33634781	33635176	396	*
1	34597771	34598236	466	*
1	34626378	34626849	472	*
1	34681465	34681833	369	*
1	34742637	34743077	441	*
1	34755078	34755686	609	*
1	34762608	34763882	1275	*
1	34781020	34781985	966	*
1	34783587	34783938	352	*
1	34786477	34786809	333	*
1	34852639	34853335	697	*
1	34858827	34860208	1382	*
1	34865848	34866870	1023	*
1	34885439	34886058	620	*
1	34983962	34985731	1770	*
1	35031450	35032200	751	*
1	35079027	35079948	922	*
1	35191916	35193705	1790	*
1	35202108	35202483	376	*
1	35220842	35221340	499	*
1	35268318	35269501	1184	*
1	35287850	35288136	287	*
1	35450962	35451392	431	*
1	35505826	35506611	786	*
1	35545072	35545423	352	*
1	35556834	35557970	1137	*
1	35564505	35564983	479	*
1	35568935	35569253	319	*
1	35573090	35573818	729	*
1	35641198	35642260	1063	*
1	35707305	35708479	1175	*
1	35717802	35719346	1545	*
1	35726812	35727406	595	*
1	35769163	35770399	1237	*
1	35807423	35809205	1783	*
1	35882754	35884157	1404	*
1	35930216	35931861	1646	*
1	36088487	36089811	1325	*
1	36096787	36097430	644	*
1	36099440	36100334	895	*
1	36133406	36134083	678	*
1	36148953	36149975	1023	*
1	36150543	36151253	711	*
1	36155515	36157363	1849	*
1	36160818	36161423	606	*
1	36187757	36188649	893	*
1	36203488	36204477	990	*
1	36217667	36217960	294	*
1	36223709	36225274	1566	*
1	36248298	36249089	792	*
1	36266194	36266785	592	*
1	36285460	36285785	326	*
1	36299824	36300397	574	*
1	36306135	36307540	1406	*
1	36323012	36324004	993	*
1	36342532	36343300	769	*
1	36350738	36351995	1258	*
1	36369039	36369429	391	*
1	36373685	36375105	1421	*
1	36385024	36386342	1319	*
1	36386403	36387131	729	*
1	36397186	36398195	1010	*
1	36408418	36409017	600	*
1	36420780	36421362	583	*
1	36450073	36450992	920	*
1	36463472	36464910	1439	*
1	36516375	36516713	339	*
1	36553707	36554293	587	*
1	36576005	36576455	451	*
1	36609289	36609609	321	*
1	36650450	36650796	347	*
1	36703720	36704097	378	*
1	37177286	37177648	363	*
1	37434286	37434871	586	*
1	37454690	37455589	900	*
1	37471391	37472234	844	*
1	37474276	37474768	493	*
1	37476486	37477394	909	*
1	37479678	37480152	475	*
1	37487062	37487628	567	*
1	37498965	37499644	680	*
1	37513859	37515341	1483	*
1	37534419	37534905	487	*
1	37553865	37554601	737	*
1	37595347	37596421	1075	*
1	37603173	37603484	312	*
1	37634330	37634880	551	*
1	37690027	37690854	828	*
1	37691521	37692828	1308	*
1	37752648	37753529	882	*
1	37793574	37794533	960	*
1	37807446	37809326	1881	*
1	37859026	37860474	1449	*
1	37865380	37865999	620	*
1	37931154	37932188	1035	*
1	37946108	37947282	1175	*
1	37989298	37990420	1123	*
1	37995752	37996878	1127	*
1	38005203	38005974	772	*
1	38012216	38013344	1129	*
1	38029819	38030501	683	*
1	38046622	38047722	1101	*
1	38064104	38064687	584	*
1	38088269	38088899	631	*
1	38114301	38114676	376	*
1	38138355	38139280	926	*
1	38221012	38221620	609	*
1	38246842	38247333	492	*
1	38489836	38490200	365	*
1	38786211	38786938	728	*
1	38817980	38818512	533	*
1	38835266	38835614	349	*
1	38858859	38860504	1646	*
1	38872670	38873929	1260	*
1	38941295	38942206	912	*
1	38973125	38973517	393	*
1	38990653	38992451	1799	*
1	39025900	39027206	1307	*
1	39081022	39082027	1006	*
1	39098363	39099076	714	*
1	39104957	39106675	1719	*
1	39130297	39130737	441	*
1	39159170	39159623	454	*
1	39178300	39179396	1097	*
1	39183585	39184365	781	*
1	39191644	39192757	1114	*
1	39204376	39205077	702	*
1	39258474	39259114	641	*
1	39378330	39378665	336	*
1	39387445	39387802	358	*
1	39392074	39392388	315	*
1	39395479	39395895	417	*
1	39398316	39399119	804	*
1	39408298	39409748	1451	*
1	39490953	39491981	1029	*
1	39508836	39509292	457	*
1	39539019	39539566	548	*
1	39559155	39559946	792	*
1	39575434	39576149	716	*
1	39576368	39577118	751	*
1	39605962	39606778	817	*
1	39609579	39610100	522	*
1	39632700	39633427	728	*
1	39639337	39640159	823	*
1	39653543	39654027	485	*
1	39671783	39672342	560	*
1	39691104	39691775	672	*
1	39701680	39702213	534	*
1	39738585	39739612	1028	*
1	39788379	39789644	1266	*
1	39799069	39800214	1146	*
1	39816449	39817150	702	*
1	39845501	39846124	624	*
1	39882974	39883894	921	*
1	39892600	39893609	1010	*
1	39900838	39902573	1736	*
1	39919525	39919914	390	*
1	39954850	39956312	1463	*
1	39960373	39960892	520	*
1	39973455	39973765	311	*
1	40039445	40041097	1653	*
1	40084739	40085167	429	*
1	40096725	40097833	1109	*
1	40143866	40144378	513	*
1	40161086	40162059	974	*
1	40257397	40258659	1263	*
1	40267688	40268283	596	*
1	40315265	40315791	527	*
1	40316304	40317104	801	*
1	40338526	40339111	586	*
1	40373326	40374992	1667	*
1	40438416	40438779	364	*
1	40449725	40451234	1510	*
1	40476895	40478041	1147	*
1	40508324	40509441	1118	*
1	40531328	40532166	839	*
1	40583384	40583923	540	*
1	40612292	40612911	620	*
1	40665186	40666114	929	*
1	40668779	40669137	359	*
1	40691372	40692846	1475	*
1	40703252	40703714	463	*
1	40711337	40712026	690	*
1	40774207	40774529	323	*
1	40783325	40783936	612	*
1	40802179	40802829	651	*
1	40848553	40849056	504	*
1	40849853	40850531	679	*
1	40861337	40862919	1583	*
1	40875691	40876164	474	*
1	40877639	40878248	610	*
1	40897495	40897905	411	*
1	40898412	40899034	623	*
1	40901817	40902480	664	*
1	40944315	40944795	481	*
1	40952329	40953010	682	*
1	40967405	40968544	1140	*
1	40979269	40980630	1362	*
1	41003373	41004216	844	*
1	41102041	41102998	958	*
1	41109306	41110321	1016	*
1	41123075	41123741	667	*
1	41152351	41153162	812	*
1	41241230	41242771	1542	*
1	41268167	41268651	485	*
1	41282693	41283226	534	*
1	41322897	41323237	341	*
1	41360847	41362237	1391	*
1	41365780	41366877	1098	*
1	41371794	41372609	816	*
1	41381647	41383278	1632	*
1	41418788	41419444	657	*
1	41423440	41424361	922	*
1	41432288	41433481	1194	*
1	41442544	41443252	709	*
1	41455682	41456295	614	*
1	41474474	41475345	872	*
1	41476713	41477382	670	*
1	41482340	41483301	962	*
1	41484236	41485170	935	*
1	41493027	41493668	642	*
1	41496137	41496642	506	*
1	41498555	41499268	714	*
1	41501529	41502171	643	*
1	41514384	41514739	356	*
1	41515850	41516667	818	*
1	41537766	41538334	569	*
1	41573859	41574657	799	*
1	41626037	41626766	730	*
1	41626951	41627371	421	*
1	41649986	41650489	504	*
1	41661436	41663198	1763	*
1	41672105	41672783	679	*
1	41712660	41713071	412	*
1	41713646	41714307	662	*
1	41782988	41783719	732	*
1	41812068	41812946	879	*
1	41823331	41823899	569	*
1	41862276	41863428	1153	*
1	41870023	41870587	565	*
1	41900492	41901211	720	*
1	41902005	41902622	618	*
1	41917904	41918387	484	*
1	41954468	41955018	551	*
1	41955458	41956175	718	*
1	42003442	42003837	396	*
1	42035140	42036440	1301	*
1	42146800	42147208	409	*
1	42165416	42166379	964	*
1	42176975	42177274	300	*
1	42214433	42215001	569	*
1	42334249	42335976	1728	*
1	42380247	42381194	948	*
1	42439880	42440431	552	*
1	42455832	42457249	1418	*
1	42462792	42463686	895	*
1	42657938	42659236	1299	*
1	42681715	42683338	1624	*
1	42756948	42757323	376	*
1	42765914	42767805	1892	*
1	42816569	42817613	1045	*
1	42846089	42847411	1323	*
1	42913390	42913690	301	*
1	42923026	42923354	329	*
1	42923887	42925164	1278	*
1	42936219	42936983	765	*
1	42940981	42941420	440	*
1	42941717	42942195	479	*
1	42943146	42943686	541	*
1	42957783	42959508	1726	*
1	42962655	42963001	347	*
1	42967024	42967634	611	*
1	43008168	43009004	837	*
1	43048700	43049424	725	*
1	43073480	43074003	524	*
1	43147512	43148157	646	*
1	43171761	43172906	1146	*
1	43206577	43207800	1224	*
1	43227076	43227740	665	*
1	43238143	43238431	289	*
1	43241601	43241941	341	*
1	43256581	43257195	615	*
1	43293917	43295009	1093	*
1	43348430	43349951	1522	*
1	43358134	43359519	1386	*
1	43366796	43368636	1841	*
1	43373022	43373803	782	*
1	43389365	43390291	927	*
1	43414634	43415143	510	*
1	43423564	43424244	681	*
1	43452803	43454183	1381	*
1	43454450	43454892	443	*
1	43472485	43473180	696	*
1	43476060	43476326	267	*
1	43523118	43523516	399	*
1	43529246	43529480	235	*
1	43530661	43532170	1510	*
1	43554475	43554763	289	*
1	43582080	43582718	639	*
1	43634702	43635072	371	*
1	43649486	43650844	1359	*
1	43706956	43708163	1208	*
1	43763365	43763997	633	*
1	43774409	43774722	314	*
1	43776479	43776815	337	*
1	43783248	43784235	988	*
1	43821934	43822682	749	*
1	43834942	43835685	744	*
1	43836381	43836939	559	*
1	43853090	43853954	865	*
1	43858130	43858940	811	*
1	43879401	43879868	468	*
1	43885033	43885871	839	*
1	43912584	43913200	617	*
1	43933282	43935116	1835	*
1	43946096	43947992	1897	*
1	43969611	43970329	719	*
1	43974244	43975456	1213	*
1	43979508	43980259	752	*
1	43991005	43992280	1276	*
1	44005566	44006227	662	*
1	44029704	44031806	2103	*
1	44035986	44037138	1153	*
1	44047722	44048546	825	*
1	44048838	44049254	417	*
1	44049750	44050450	701	*
1	44089461	44090077	617	*
1	44101262	44101939	678	*
1	44154678	44155557	880	*
1	44213199	44213991	793	*
1	44293727	44294327	601	*
1	44325917	44326726	810	*
1	44327563	44328600	1038	*
1	44354784	44355812	1029	*
1	44389955	44390796	842	*
1	44404994	44407033	2040	*
1	44423419	44424277	859	*
1	44485159	44486396	1238	*
1	44531908	44532601	694	*
1	44553776	44554125	350	*
1	44568130	44568460	331	*
1	44594965	44595679	715	*
1	44631419	44632819	1401	*
1	44652679	44653224	546	*
1	44655483	44655868	386	*
1	44673681	44674997	1317	*
1	44707112	44707613	502	*
1	44713212	44713557	346	*
1	44714954	44715308	355	*
1	44721159	44722343	1185	*
1	44730467	44731521	1055	*
1	44738240	44738884	645	*
1	44739347	44740435	1089	*
1	44775077	44776240	1164	*
1	44786124	44786816	693	*
1	44793510	44794087	578	*
1	44799679	44801098	1420	*
1	44807030	44808755	1726	*
1	44819255	44820766	1512	*
1	44835829	44836232	404	*
1	44842743	44843709	967	*
1	44924795	44925409	615	*
1	44947390	44947885	496	*
1	44968058	44968719	662	*
1	44970275	44970731	457	*
1	44985730	44986950	1221	*
1	45010440	45011518	1079	*
1	45011819	45012484	666	*
1	45012546	45013062	517	*
1	45018657	45019208	552	*
1	45179706	45180574	869	*
1	45198101	45198621	521	*
1	45205565	45207042	1478	*
1	45246601	45247183	583	*
1	45266035	45266802	768	*
1	45303272	45304438	1167	*
1	45326568	45328367	1800	*
1	45329452	45329873	422	*
1	45339499	45341120	1622	*
1	45356149	45356616	468	*
1	45393614	45394384	771	*
1	45410779	45411940	1162	*
1	45442082	45442635	554	*
1	45490588	45491721	1134	*
1	45499641	45500630	990	*
1	45508171	45509189	1019	*
1	45521298	45522394	1097	*
1	45522713	45523090	378	*
1	45550415	45551360	946	*
1	45569878	45570610	733	*
1	45583238	45585160	1923	*
1	45590126	45590600	475	*
1	45686084	45687601	1518	*
1	45750060	45751139	1080	*
1	45802604	45804475	1872	*
1	45840630	45841142	513	*
1	45881596	45881952	357	*
1	45891912	45892831	920	*
1	45954060	45954885	826	*
1	46036877	46037542	666	*
1	46103043	46103551	509	*
1	46132345	46133700	1356	*
1	46171147	46171786	640	*
1	46174308	46175202	895	*
1	46179528	46179784	257	*
1	46183039	46183861	823	*
1	46197834	46198918	1085	*
1	46223325	46223993	669	*
1	46246926	46248659	1734	*
1	46301430	46303439	2010	*
1	46303527	46303963	437	*
1	46333498	46334041	544	*
1	46339614	46341391	1778	*
1	46347912	46348502	591	*
1	46401913	46402581	669	*
1	46406152	46407036	885	*
1	46442305	46443226	922	*
1	46446824	46447165	342	*
1	46477445	46477776	332	*
1	46489207	46490210	1004	*
1	46516668	46517563	896	*
1	46520044	46520982	939	*
1	46522175	46522908	734	*
1	46527880	46528584	705	*
1	46532913	46533700	788	*
1	46547865	46548442	578	*
1	46603797	46604597	801	*
1	46616137	46617302	1166	*
1	46622354	46622814	461	*
1	46643171	46643911	741	*
1	46667567	46668783	1217	*
1	46718544	46719646	1103	*
1	46725055	46725601	547	*
1	46747725	46748052	328	*
1	47013052	47013936	885	*
1	47030341	47031589	1249	*
1	47069042	47069771	730	*
1	47179063	47179795	733	*
1	47189911	47190683	773	*
1	47253887	47254388	502	*
1	47313429	47314601	1173	*
1	47333340	47334931	1592	*
1	47388588	47389261	674	*
1	47424290	47424916	627	*
1	47436476	47438270	1795	*
1	47449939	47450438	500	*
1	47487806	47488377	572	*
1	47521054	47521875	822	*
1	47534106	47534812	707	*
1	47569783	47570225	443	*
1	47650207	47650748	542	*
1	47684727	47685556	830	*
1	47709423	47710241	819	*
1	47710301	47711049	749	*
1	47726005	47726629	625	*
1	47738583	47739198	616	*
1	47758260	47760118	1859	*
1	47797535	47798113	579	*
1	47809254	47809927	674	*
1	47871609	47872447	839	*
1	47894604	47895444	841	*
1	47905845	47906841	997	*
1	47914157	47914970	814	*
1	47926402	47926956	555	*
1	47934106	47935153	1048	*
1	47941924	47942568	645	*
1	47991175	47991514	340	*
1	47992683	47993199	517	*
1	47996392	47997961	1570	*
1	48006999	48007547	549	*
1	48017765	48018102	338	*
1	48019636	48020362	727	*
1	48026282	48026688	407	*
1	48047010	48047530	521	*
1	48052185	48052979	795	*
1	48069440	48070824	1385	*
1	48077769	48078310	542	*
1	48082243	48082923	681	*
1	48093695	48094444	750	*
1	48109441	48109753	313	*
1	48114643	48115562	920	*
1	48201985	48202671	687	*
1	48368998	48369998	1001	*
1	48471685	48472666	982	*
1	48494252	48494804	553	*
1	48498128	48498423	296	*
1	48530744	48531116	373	*
1	48572660	48573164	505	*
1	48677354	48677686	333	*
1	48741395	48741917	523	*
1	48817559	48817920	362	*
1	48852862	48853521	660	*
1	48878259	48879040	782	*
1	48916032	48916809	778	*
1	48931342	48932303	962	*
1	49257173	49257988	816	*
1	49331444	49331860	417	*
1	50271993	50272297	305	*
1	50332847	50333891	1045	*
1	50348568	50349554	987	*
1	50368413	50368956	544	*
1	50423313	50424049	737	*
1	50749995	50750332	338	*
1	50873394	50874141	748	*
1	50959297	50960829	1533	*
1	50968042	50970366	2325	*
1	50976905	50978561	1657	*
1	50985019	50985560	542	*
1	51063125	51063785	661	*
1	51071967	51072495	529	*
1	51235791	51237271	1481	*
1	51261268	51261835	568	*
1	51264405	51264926	522	*
1	51296496	51297263	768	*
1	51313912	51314708	797	*
1	51331218	51331842	625	*
1	51344596	51345315	720	*
1	51517942	51519581	1640	*
1	51541295	51541949	655	*
1	51558108	51558974	867	*
1	51567648	51568185	538	*
1	51569475	51570241	767	*
1	51616851	51617881	1031	*
1	51622444	51622878	435	*
1	51636918	51637515	598	*
1	51642480	51643284	805	*
1	51648286	51648826	541	*
1	51660673	51661633	961	*
1	51671559	51672372	814	*
1	51699291	51699874	584	*
1	51729146	51730295	1150	*
1	51736753	51737137	385	*
1	51877999	51879389	1391	*
1	51897306	51898021	716	*
1	51990251	51991117	867	*
1	52002132	52002664	533	*
1	52032456	52034015	1560	*
1	52054911	52055780	870	*
1	52056009	52056984	976	*
1	52127297	52127961	665	*
1	52141676	52143051	1376	*
1	52159377	52159760	384	*
1	52176530	52177369	840	*
1	52296280	52296633	354	*
1	52365129	52366679	1551	*
1	52403633	52405070	1438	*
1	52552204	52553926	1723	*
1	52574468	52575250	783	*
1	52632820	52633625	806	*
1	52662580	52663256	677	*
1	52686231	52686660	430	*
1	52697571	52698845	1275	*
1	52702912	52703706	795	*
1	52708268	52708799	532	*
1	52726144	52727454	1311	*
1	52833453	52834009	557	*
1	52842420	52844167	1748	*
1	52921153	52922149	997	*
1	52926938	52928318	1381	*
1	53014680	53015120	441	*
1	53135209	53136111	903	*
1	53145739	53146778	1040	*
1	53172679	53173199	521	*
1	53185529	53186048	520	*
1	53196303	53197677	1375	*
1	53220080	53221020	941	*
1	53238148	53239062	915	*
1	53292938	53293539	602	*
1	53325708	53327713	2006	*
1	53327991	53328494	504	*
1	53381802	53382422	621	*
1	53393333	53393836	504	*
1	53413079	53414036	958	*
1	53444609	53445117	509	*
1	53448723	53449507	785	*
1	53470047	53470672	626	*
1	53477597	53478032	436	*
1	53485447	53486013	567	*
1	53509247	53509696	450	*
1	53512102	53512987	886	*
1	53541813	53542917	1105	*
1	53572238	53573033	796	*
1	53582102	53582698	597	*
1	53625824	53626497	674	*
1	53639130	53639870	741	*
1	53685117	53686067	951	*
1	53734975	53735248	274	*
1	53738786	53739712	927	*
1	53837715	53838788	1074	*
1	53860894	53861431	538	*
1	53889395	53890308	914	*
1	53945270	53946829	1560	*
1	53956944	53957681	738	*
1	53992042	53992693	652	*
1	54016393	54016874	482	*
1	54052263	54054112	1850	*
1	54069845	54070436	592	*
1	54081668	54081986	319	*
1	54121013	54122096	1084	*
1	54153767	54154271	505	*
1	54157869	54158577	709	*
1	54181718	54182036	319	*
1	54199532	54200883	1352	*
1	54227029	54227739	711	*
1	54229201	54229967	767	*
1	54253457	54254014	558	*
1	54272889	54274222	1334	*
1	54279070	54279476	407	*
1	54287019	54287849	831	*
1	54335726	54336158	433	*
1	54405221	54405572	352	*
1	54406201	54406735	535	*
1	54421023	54421609	587	*
1	54459582	54460103	522	*
1	54487949	54488667	719	*
1	54488915	54489779	865	*
1	54490429	54490970	542	*
1	54499000	54500254	1255	*
1	54541814	54543025	1212	*
1	54564268	54564806	539	*
1	54581404	54582132	729	*
1	54671974	54672420	447	*
1	54715425	54716575	1151	*
1	54763990	54765112	1123	*
1	54801167	54801795	629	*
1	54807286	54807637	352	*
1	54810316	54810970	655	*
1	54850775	54851164	390	*
1	54856272	54857098	827	*
1	54860959	54861364	406	*
1	54886397	54888032	1636	*
1	54904218	54905089	872	*
1	54934776	54935260	485	*
1	54945204	54945445	242	*
1	54945509	54945898	390	*
1	54950091	54951028	938	*
1	54955379	54955887	509	*
1	54965815	54966266	452	*
1	54971304	54971840	537	*
1	54980445	54980958	514	*
1	54996276	54996815	540	*
1	55021830	55022624	795	*
1	55039108	55040821	1714	*
1	55071481	55071868	388	*
1	55140561	55140912	352	*
1	55214279	55215937	1659	*
1	55277201	55277891	691	*
1	55310441	55311462	1022	*
1	55321845	55322453	609	*
1	55362579	55362978	400	*
1	55374941	55375869	929	*
1	55428849	55429816	968	*
1	55443286	55443941	656	*
1	55472593	55473227	635	*
1	55503702	55505033	1332	*
1	55506746	55507543	798	*
1	55542832	55543639	808	*
1	55559799	55560409	611	*
1	55572767	55573522	756	*
1	55580919	55581323	405	*
1	55584822	55585305	484	*
1	55631672	55632588	917	*
1	55632868	55633318	451	*
1	55670428	55671168	741	*
1	55694150	55694944	795	*
1	55700289	55701247	959	*
1	55718644	55719577	934	*
1	55726741	55727462	722	*
1	55750252	55751004	753	*
1	55781686	55782615	930	*
1	55812288	55812788	501	*
1	55813566	55814118	553	*
1	55827264	55827730	467	*
1	55970704	55971294	591	*
1	55974696	55975625	930	*
1	56017388	56017775	388	*
1	56064672	56065242	571	*
1	56073749	56074666	918	*
1	56137673	56138527	855	*
1	56146367	56146860	494	*
1	56301796	56302345	550	*
1	56362938	56363644	707	*
1	56374480	56375001	522	*
1	56376665	56377090	426	*
1	56425083	56425606	524	*
1	56456546	56457169	624	*
[truncated: 56,384 more rows]

## Sheet: 0h VH298
seqnames	start	end	width	strand
1	267866	268152	287	*
1	778262	779334	1073	*
1	826596	827961	1366	*
1	869594	870267	674	*
1	904277	904940	664	*
1	906746	907261	516	*
1	910713	911556	844	*
1	925531	925873	343	*
1	938154	938876	723	*
1	943167	943488	322	*
1	958977	959754	778	*
1	960392	961397	1006	*
1	966004	967403	1400	*
1	975858	976681	824	*
1	999550	1000919	1370	*
1	1001574	1002135	562	*
1	1005232	1005614	383	*
1	1013148	1014664	1517	*
1	1019281	1020421	1141	*
1	1021106	1021770	665	*
1	1024579	1025536	958	*
1	1058403	1060009	1607	*
1	1063910	1064537	628	*
1	1073968	1074828	861	*
1	1079382	1080603	1222	*
1	1115745	1116937	1193	*
1	1121765	1122652	888	*
1	1133406	1133743	338	*
1	1157367	1158686	1320	*
1	1207992	1208737	746	*
1	1230729	1232627	1899	*
1	1244074	1244646	573	*
1	1258515	1259014	500	*
1	1264708	1265606	899	*
1	1272724	1274775	2052	*
1	1281511	1282451	941	*
1	1290805	1292217	1413	*
1	1304744	1305215	472	*
1	1305329	1305941	613	*
1	1318019	1318658	640	*
1	1324266	1325784	1519	*
1	1330579	1331651	1073	*
1	1344662	1346107	1446	*
1	1347659	1348296	638	*
1	1360149	1360981	833	*
1	1374661	1375726	1066	*
1	1398978	1400600	1623	*
1	1406715	1408036	1322	*
1	1431702	1432251	550	*
1	1440687	1441449	763	*
1	1470646	1472202	1557	*
1	1504699	1505826	1128	*
1	1511372	1512579	1208	*
1	1554528	1555269	742	*
1	1574238	1575542	1305	*
1	1586203	1586683	481	*
1	1599631	1600248	618	*
1	1615112	1616846	1735	*
1	1627161	1629051	1891	*
1	1658650	1659553	904	*
1	1686267	1687060	794	*
1	1692267	1693382	1116	*
1	1723950	1724864	915	*
1	1740953	1741459	507	*
1	1758554	1759654	1101	*
1	1764292	1764617	326	*
1	1777581	1779145	1565	*
1	1782624	1783301	678	*
1	1859043	1859755	713	*
1	1889909	1892017	2109	*
1	1894451	1894922	472	*
1	1906249	1907911	1663	*
1	1908434	1909502	1069	*
1	1918928	1920039	1112	*
1	1943854	1944519	666	*
1	1959767	1960581	815	*
1	1968869	1969878	1010	*
1	2003412	2004116	705	*
1	2014868	2015589	722	*
1	2044755	2045182	428	*
1	2049502	2050991	1490	*
1	2104305	2105566	1262	*
1	2132742	2133964	1223	*
1	2139796	2140480	685	*
1	2174122	2174814	693	*
1	2189336	2190660	1325	*
1	2194569	2195700	1132	*
1	2199068	2199812	745	*
1	2205197	2205555	359	*
1	2207154	2208886	1733	*
1	2212441	2213368	928	*
1	2227183	2228092	910	*
1	2234247	2235018	772	*
1	2314327	2315063	737	*
1	2330785	2331521	737	*
1	2360523	2361479	957	*
1	2372811	2373265	455	*
1	2381517	2382439	923	*
1	2391005	2392383	1379	*
1	2411947	2413530	1584	*
1	2801549	2802225	677	*
1	2821813	2822480	668	*
1	2922059	2922372	314	*
1	3066199	3066698	500	*
1	3312880	3313696	817	*
1	3319798	3320455	658	*
1	3410163	3410709	547	*
1	3419424	3420006	583	*
1	3453039	3455178	2140	*
1	3471162	3472111	950	*
1	3481803	3482852	1050	*
1	3491205	3492045	841	*
1	3494754	3495442	689	*
1	3502972	3503357	386	*
1	3503860	3505072	1213	*
1	3509910	3510853	944	*
1	3515932	3516722	791	*
1	3530026	3531829	1804	*
1	3542741	3543947	1207	*
1	3547213	3548777	1565	*
1	3554888	3555693	806	*
1	3610881	3611901	1021	*
1	3618757	3619403	647	*
1	3624214	3625863	1650	*
1	3640245	3640909	665	*
1	3649680	3650314	635	*
1	3668668	3669394	727	*
1	3695632	3695980	349	*
1	3703146	3703883	738	*
1	3724277	3724762	486	*
1	3727250	3727611	362	*
1	3746590	3747643	1054	*
1	3772052	3773285	1234	*
1	3775944	3776311	368	*
1	3795681	3797117	1437	*
1	3801443	3801818	376	*
1	3811265	3811802	538	*
1	3856555	3858126	1572	*
1	3869682	3870246	565	*
1	3899582	3901644	2063	*
1	3910638	3911391	754	*
1	4585245	4585695	451	*
1	4652555	4653087	533	*
1	5424689	5425275	587	*
1	5509721	5510224	504	*
1	5514356	5514894	539	*
1	5597984	5598801	818	*
1	5637219	5637558	340	*
1	5717686	5718118	433	*
1	5745703	5746366	664	*
1	5893693	5894025	333	*
1	5927885	5928666	782	*
1	5975159	5975562	404	*
1	5991476	5993605	2130	*
1	6025135	6026951	1817	*
1	6108839	6109537	699	*
1	6111631	6112081	451	*
1	6127522	6128342	821	*
1	6148298	6149035	738	*
1	6157261	6158348	1088	*
1	6198873	6200192	1320	*
1	6204993	6205560	568	*
1	6205655	6206956	1302	*
1	6222604	6223072	469	*
1	6234453	6236389	1937	*
1	6245017	6246042	1026	*
1	6259633	6260684	1052	*
1	6260817	6261602	786	*
1	6300082	6301090	1009	*
1	6331374	6332125	752	*
1	6341955	6342534	580	*
1	6343273	6344178	906	*
1	6353780	6354590	811	*
1	6363049	6363600	552	*
1	6392347	6394250	1904	*
1	6404572	6404997	426	*
1	6414151	6414784	634	*
1	6419633	6420329	697	*
1	6422840	6423147	308	*
1	6423264	6423722	459	*
1	6427336	6428302	967	*
1	6437015	6437606	592	*
1	6440300	6440868	569	*
1	6448608	6449457	850	*
1	6464470	6464889	420	*
1	6475362	6476066	705	*
1	6486469	6486850	382	*
1	6489011	6489772	762	*
1	6489899	6491026	1128	*
1	6491136	6491910	775	*
1	6497277	6497889	613	*
1	6501879	6502668	790	*
1	6523587	6524017	431	*
1	6553638	6554834	1197	*
1	6577948	6578626	679	*
1	6579507	6581175	1669	*
1	6600816	6603732	2917	*
1	6612709	6614625	1917	*
1	6624646	6626072	1427	*
1	6634628	6635047	420	*
1	6701013	6702215	1203	*
1	6719989	6720330	342	*
1	6724512	6725264	753	*
1	6743595	6744205	611	*
1	6770632	6771402	771	*
1	6784190	6785613	1424	*
1	6795293	6796396	1104	*
1	6859584	6860819	1236	*
1	6869166	6869976	811	*
1	6889903	6890247	345	*
1	6934703	6935872	1170	*
1	6960288	6960921	634	*
1	6962344	6963939	1596	*
1	6991173	6991877	705	*
1	6998220	6998688	469	*
1	7046280	7046628	349	*
1	7070151	7070792	642	*
1	7075391	7075815	425	*
1	7117361	7118416	1056	*
1	7121497	7122185	689	*
1	7127473	7128517	1045	*
1	7136033	7137051	1019	*
1	7149461	7149898	438	*
1	7223441	7224309	869	*
1	7265651	7266754	1104	*
1	7299229	7300268	1040	*
1	7300843	7301799	957	*
1	7334407	7336237	1831	*
1	7341122	7342108	987	*
1	7379347	7379852	506	*
1	7380548	7381083	536	*
1	7388728	7390432	1705	*
1	7401742	7402575	834	*
1	7424349	7425268	920	*
1	7462483	7463168	686	*
1	7469072	7470028	957	*
1	7470678	7472176	1499	*
1	7477019	7477653	635	*
1	7478914	7479349	436	*
1	7482808	7483188	381	*
1	7491135	7492389	1255	*
1	7516347	7516650	304	*
1	7526344	7526987	644	*
1	7533967	7534697	731	*
1	7539538	7540139	602	*
1	7549212	7550500	1289	*
1	7574145	7575045	901	*
1	7645255	7645934	680	*
1	7647094	7647622	529	*
1	7667516	7668159	644	*
1	7669463	7669944	482	*
1	7680062	7680812	751	*
1	7704329	7704999	671	*
1	7752205	7753189	985	*
1	7770870	7772354	1485	*
1	7783172	7784694	1523	*
1	7810446	7810744	299	*
1	7869517	7869951	435	*
1	7893625	7894910	1286	*
1	7902620	7903119	500	*
1	7953716	7954668	953	*
1	7961044	7962243	1200	*
1	7974960	7975684	725	*
1	7982079	7982777	699	*
1	8004255	8005674	1420	*
1	8017491	8018162	672	*
1	8025722	8026936	1215	*
1	8027980	8028639	660	*
1	8040426	8041350	925	*
1	8046041	8046786	746	*
1	8047598	8048492	895	*
1	8055948	8056476	529	*
1	8061223	8062400	1178	*
1	8077072	8077614	543	*
1	8078141	8078740	600	*
1	8083749	8084343	595	*
1	8091500	8092045	546	*
1	8094350	8094956	607	*
1	8097207	8097854	648	*
1	8116551	8117328	778	*
1	8120976	8121847	872	*
1	8133137	8134470	1334	*
1	8137616	8138255	640	*
1	8154668	8155050	383	*
1	8174165	8175215	1051	*
1	8182040	8183013	974	*
1	8197558	8198379	822	*
1	8201308	8201741	434	*
1	8202118	8202895	778	*
1	8204243	8204870	628	*
1	8211723	8212559	837	*
1	8259063	8260219	1157	*
1	8293183	8293564	382	*
1	8314118	8314860	743	*
1	8317921	8318475	555	*
1	8343128	8344202	1075	*
1	8348830	8349333	504	*
1	8374796	8375160	365	*
1	8396916	8397367	452	*
1	8412193	8412843	651	*
1	8423138	8424764	1627	*
1	8438947	8439809	863	*
1	8483101	8483471	371	*
1	8525271	8526302	1032	*
1	8625891	8627178	1288	*
1	8661339	8662278	940	*
1	8700987	8701779	793	*
1	8702916	8703826	911	*
1	8706939	8707437	499	*
1	8712055	8713288	1234	*
1	8726388	8727060	673	*
1	8733368	8734068	701	*
1	8817449	8818298	850	*
1	8822578	8823167	590	*
1	8848683	8849608	926	*
1	8873533	8873983	451	*
1	8877958	8879533	1576	*
1	8880116	8880589	474	*
1	8889214	8890966	1753	*
1	8903546	8904565	1020	*
1	8917861	8918579	719	*
1	8962717	8963482	766	*
1	8974005	8974544	540	*
1	8985992	8986718	727	*
1	9004863	9005510	648	*
1	9078288	9079421	1134	*
1	9080505	9081257	753	*
1	9084780	9085599	820	*
1	9085920	9086422	503	*
1	9101417	9101939	523	*
1	9110387	9111343	957	*
1	9127410	9129972	2563	*
1	9145095	9145621	527	*
1	9162849	9164508	1660	*
1	9181079	9182965	1887	*
1	9196291	9196976	686	*
1	9201398	9202188	791	*
1	9234207	9235500	1294	*
1	9266920	9267600	681	*
1	9270370	9270963	594	*
1	9275507	9276069	563	*
1	9280392	9280983	592	*
1	9290066	9290802	737	*
1	9291939	9293327	1389	*
1	9300076	9300728	653	*
1	9302746	9303722	977	*
1	9315482	9316488	1007	*
1	9321206	9321988	783	*
1	9350004	9351018	1015	*
1	9371409	9371909	501	*
1	9376456	9377535	1080	*
1	9384491	9385334	844	*
1	9388452	9389230	779	*
1	9401695	9402359	665	*
1	9412610	9414107	1498	*
1	9428658	9429629	972	*
1	9438508	9439296	789	*
1	9455792	9456303	512	*
1	9472785	9473617	833	*
1	9490902	9491446	545	*
1	9495004	9495734	731	*
1	9539086	9540468	1383	*
1	9561270	9561981	712	*
1	9588302	9590230	1929	*
1	9615418	9615909	492	*
1	9626904	9627611	708	*
1	9687289	9688124	836	*
1	9688964	9689876	913	*
1	9702264	9702553	290	*
1	9718899	9719734	836	*
1	9724857	9725416	560	*
1	9792222	9792975	754	*
1	9798025	9799052	1028	*
1	9822955	9824737	1783	*
1	9825071	9826029	959	*
1	9842560	9843823	1264	*
1	9867319	9868062	744	*
1	9874884	9875347	464	*
1	9877892	9878420	529	*
1	9890193	9890821	629	*
1	9898302	9898616	315	*
1	9909714	9911275	1562	*
1	9942419	9943999	1581	*
1	9950291	9950919	629	*
1	9960726	9961788	1063	*
1	9996925	9998120	1196	*
1	10032441	10033854	1414	*
1	10055691	10056140	450	*
1	10074045	10074970	926	*
1	10108046	10108969	924	*
1	10122731	10123465	735	*
1	10209771	10212192	2422	*
1	10339830	10340115	286	*
1	10377307	10377904	598	*
1	10387442	10388406	965	*
1	10398352	10399961	1610	*
1	10415150	10415740	591	*
1	10430161	10431417	1257	*
1	10459049	10459615	567	*
1	10471771	10472848	1078	*
1	10474742	10475609	868	*
1	10494461	10495375	915	*
1	10507307	10507897	591	*
1	10510465	10511252	788	*
1	10527968	10529447	1480	*
1	10537195	10537750	556	*
1	10575441	10576002	562	*
1	10599114	10599938	825	*
1	10634631	10636086	1456	*
1	10646367	10646700	334	*
1	10693810	10695320	1511	*
1	10723930	10724689	760	*
1	10727673	10728325	653	*
1	10731047	10731466	420	*
1	10755763	10756462	700	*
1	10779217	10779711	495	*
1	10788562	10789096	535	*
1	10796142	10796926	785	*
1	10803997	10804874	878	*
1	10824780	10825286	507	*
1	10835850	10836349	500	*
1	10837170	10837770	601	*
1	10866722	10867660	939	*
1	10900225	10901793	1569	*
1	10909936	10910421	486	*
1	10944001	10944751	751	*
1	10960803	10961560	758	*
1	10973464	10973889	426	*
1	10975617	10976286	670	*
1	10980011	10980527	517	*
1	10990091	10990617	527	*
1	11011831	11013437	1607	*
1	11037609	11038210	602	*
1	11046205	11046589	385	*
1	11059204	11060668	1465	*
1	11098874	11100236	1363	*
1	11134045	11135246	1202	*
1	11158665	11159302	638	*
1	11178014	11179005	992	*
1	11180101	11180853	753	*
1	11241527	11242243	717	*
1	11261996	11263041	1046	*
1	11272596	11274151	1556	*
1	11281353	11282646	1294	*
1	11292524	11293254	731	*
1	11293850	11294249	400	*
1	11337512	11337838	327	*
1	11478441	11479647	1207	*
1	11550696	11551034	339	*
1	11617301	11617658	358	*
1	11635846	11636372	527	*
1	11642257	11642759	503	*
1	11645695	11646238	544	*
1	11653288	11653722	435	*
1	11654328	11655197	870	*
1	11663856	11664728	873	*
1	11680425	11681963	1539	*
1	11692790	11693683	894	*
1	11733252	11733672	421	*
1	11735681	11737505	1825	*
1	11748955	11749718	764	*
1	11784978	11785648	671	*
1	11787347	11788020	674	*
1	11790717	11791491	775	*
1	11803065	11803901	837	*
1	11804822	11806582	1761	*
1	11821322	11822091	770	*
1	11838169	11839030	862	*
1	11859147	11859636	490	*
1	11893778	11894284	507	*
1	11901426	11901881	456	*
1	11908089	11909960	1872	*
1	11918648	11919463	816	*
1	11926234	11926702	469	*
1	11929874	11930160	287	*
1	11934207	11935257	1051	*
1	11938985	11939634	650	*
1	11940526	11940995	470	*
1	11961197	11961686	490	*
1	11966932	11967534	603	*
1	11979556	11980932	1377	*
1	12001965	12002608	644	*
1	12019080	12020547	1468	*
1	12030994	12031627	634	*
1	12040220	12041127	908	*
1	12044155	12044614	460	*
1	12051770	12052571	802	*
1	12067630	12068414	785	*
1	12075451	12076064	614	*
1	12121454	12122002	549	*
1	12132037	12132630	594	*
1	12132803	12133514	712	*
1	12135653	12135992	340	*
1	12143325	12144426	1102	*
1	12153090	12153836	747	*
1	12161647	12162646	1000	*
1	12208634	12209391	758	*
1	12229596	12231446	1851	*
1	12271915	12272442	528	*
1	12454445	12455487	1043	*
1	12477890	12478943	1054	*
1	12480776	12481249	474	*
1	12518737	12519416	680	*
1	12525407	12525898	492	*
1	12539808	12540884	1077	*
1	12541486	12541903	418	*
1	12548818	12550354	1537	*
1	12556297	12556948	652	*
1	12572592	12574531	1940	*
1	12579940	12580715	776	*
1	12588088	12588745	658	*
1	12595208	12596837	1630	*
1	12601801	12602481	681	*
1	12603829	12604730	902	*
1	12615894	12616866	973	*
1	12617969	12619688	1720	*
1	12636192	12637237	1046	*
1	12658609	12659465	857	*
1	12760433	12760741	309	*
1	13543960	13544301	342	*
1	13665655	13666052	398	*
1	13700011	13700730	720	*
1	13748746	13750253	1508	*
1	13766551	13767454	904	*
1	13960358	13960927	570	*
1	13965679	13966384	706	*
1	14011882	14012316	435	*
1	14017450	14018074	625	*
1	14055329	14056205	877	*
1	14095027	14095534	508	*
1	14108670	14109520	851	*
1	14112610	14114162	1553	*
1	14140706	14141183	478	*
1	14142411	14142844	434	*
1	14149459	14149813	355	*
1	14174824	14175523	700	*
1	14176229	14176788	560	*
1	14190444	14191086	643	*
1	14254162	14254857	696	*
1	14259113	14259720	608	*
1	14278885	14279519	635	*
1	14282590	14283192	603	*
1	14291026	14291774	749	*
1	14301020	14301798	779	*
1	14304323	14304954	632	*
1	14320473	14320967	495	*
1	14332131	14332822	692	*
1	14339868	14341035	1168	*
1	14345939	14346846	908	*
1	14360856	14361414	559	*
1	14366157	14366851	695	*
1	14390595	14391266	672	*
1	14413774	14414396	623	*
1	14486217	14487377	1161	*
1	14517053	14518044	992	*
1	14522235	14523220	986	*
1	14542795	14543734	940	*
1	14553640	14554353	714	*
1	14625741	14626300	560	*
1	14653335	14654194	860	*
1	14731763	14732316	554	*
1	14742144	14742931	788	*
1	14765505	14766466	962	*
1	14789718	14790073	356	*
1	14810626	14811519	894	*
1	14814933	14815872	940	*
1	14822256	14823004	749	*
1	14826078	14826642	565	*
1	14894774	14895421	648	*
1	14910100	14910731	632	*
1	14910953	14911789	837	*
1	14923722	14925038	1317	*
1	14929412	14930252	841	*
1	14939940	14940275	336	*
1	14945161	14946016	856	*
1	14946879	14947609	731	*
1	14953008	14953394	387	*
1	14953992	14954656	665	*
1	14968239	14969209	971	*
1	14970174	14970551	378	*
1	14977357	14977794	438	*
1	14980784	14981243	460	*
1	14987809	14988781	973	*
1	14996050	14997079	1030	*
1	15003096	15003866	771	*
1	15014257	15015005	749	*
1	15027620	15028568	949	*
1	15046402	15047068	667	*
1	15056856	15057282	427	*
1	15089229	15089819	591	*
1	15090240	15090836	597	*
1	15128380	15129016	637	*
1	15152343	15154378	2036	*
1	15178700	15179575	876	*
1	15200377	15201092	716	*
1	15246995	15247645	651	*
1	15261223	15261746	524	*
1	15272368	15273038	671	*
1	15282790	15283431	642	*
1	15283582	15283818	237	*
1	15284543	15285440	898	*
1	15304693	15305173	481	*
1	15323094	15324253	1160	*
1	15337463	15338492	1030	*
1	15352238	15352810	573	*
1	15356169	15357284	1116	*
1	15409394	15410491	1098	*
1	15415998	15416789	792	*
1	15426759	15427305	547	*
1	15459937	15460352	416	*
1	15460403	15460680	278	*
1	15501437	15501929	493	*
1	15523846	15525477	1632	*
1	15526399	15527347	949	*
1	15584395	15585361	967	*
1	15603048	15604000	953	*
1	15616721	15618247	1527	*
1	15678590	15678957	368	*
1	15680712	15681610	899	*
1	15741176	15741922	747	*
1	15786541	15787218	678	*
1	15788145	15788644	500	*
1	15795118	15795529	412	*
1	15796553	15797217	665	*
1	15799036	15799854	819	*
1	15799929	15801456	1528	*
1	15815350	15815882	533	*
1	15833137	15833614	478	*
1	15834298	15836456	2159	*
1	15847180	15848701	1522	*
1	15849295	15850304	1010	*
1	15865818	15866270	453	*
1	15885747	15886894	1148	*
1	15916462	15917030	569	*
1	15919330	15919697	368	*
1	15923236	15923620	385	*
1	15924550	15925299	750	*
1	15939225	15939713	489	*
1	15949060	15950300	1241	*
1	15952448	15953065	618	*
1	15975276	15976367	1092	*
1	15994413	15994903	491	*
1	16007184	16007470	287	*
1	16012628	16013787	1160	*
1	16015979	16016582	604	*
1	16032511	16033246	736	*
1	16038482	16038876	395	*
1	16048552	16049127	576	*
1	16055568	16056431	864	*
1	16073194	16073971	778	*
1	16075998	16077283	1286	*
1	16078955	16079421	467	*
1	16082366	16082878	513	*
1	16112832	16113520	689	*
1	16139295	16140173	879	*
1	16143706	16144377	672	*
1	16144959	16147246	2288	*
1	16154851	16155365	515	*
1	16155566	16156467	902	*
1	16164167	16164743	577	*
1	16167410	16168177	768	*
1	16173059	16173929	871	*
1	16174249	16174697	449	*
1	16175560	16176559	1000	*
1	16181631	16182568	938	*
1	16187604	16188176	573	*
1	16188984	16189373	390	*
1	16206197	16207329	1133	*
1	16216910	16217966	1057	*
1	16236099	16237804	1706	*
1	16244401	16244740	340	*
1	16248596	16249319	724	*
1	16249885	16250257	373	*
1	16254191	16254951	761	*
1	16324305	16324800	496	*
1	16351880	16353208	1329	*
1	16366903	16368117	1215	*
1	16375332	16376363	1032	*
1	16383795	16384272	478	*
1	16386101	16387360	1260	*
1	16440133	16441589	1457	*
1	16498673	16500213	1541	*
1	16513464	16514617	1154	*
1	16534724	16535763	1040	*
1	16612537	16614048	1512	*
1	16620967	16621398	432	*
1	16623853	16624517	665	*
1	16624984	16625230	247	*
1	16643641	16645248	1608	*
1	16677829	16678505	677	*
1	16707280	16708102	823	*
1	16709650	16710126	477	*
1	16727169	16727999	831	*
1	16770336	16770711	376	*
1	16861810	16862120	311	*
1	16872507	16873320	814	*
1	16888761	16890012	1252	*
1	16895355	16897055	1701	*
1	16903680	16905785	2106	*
1	16913604	16914704	1101	*
1	16948158	16949398	1241	*
1	16951635	16951926	292	*
1	16960536	16961258	723	*
1	16967058	16967937	880	*
1	16971773	16972350	578	*
1	16979876	16981155	1280	*
1	16984673	16985113	441	*
1	17003667	17004591	925	*
1	17010676	17012327	1652	*
1	17015943	17016638	696	*
1	17027364	17028243	880	*
1	17053690	17054625	936	*
1	17059508	17060233	726	*
1	17075472	17075793	322	*
1	17090963	17091694	732	*
1	17113646	17114456	811	*
1	17119337	17119692	356	*
1	17121183	17121761	579	*
1	17122459	17122801	343	*
1	17125733	17126226	494	*
1	17128116	17129126	1011	*
1	17162841	17163484	644	*
1	17167969	17168847	879	*
1	17169279	17169739	461	*
1	17189701	17190709	1009	*
1	17191213	17191745	533	*
1	17207688	17208433	746	*
1	17211949	17213167	1219	*
1	17226285	17226889	605	*
1	17232941	17234194	1254	*
1	17236846	17237607	762	*
1	17250424	17251238	815	*
1	17251525	17252078	554	*
1	17276463	17277151	689	*
1	17287327	17287868	542	*
1	17289633	17290320	688	*
1	17297945	17298418	474	*
1	17335909	17336582	674	*
1	17347848	17348702	855	*
1	17406011	17406699	689	*
1	17437670	17438747	1078	*
1	17439722	17440161	440	*
1	17441403	17441953	551	*
1	17460076	17461034	959	*
1	17475699	17476336	638	*
1	17494118	17494814	697	*
1	17502173	17502983	811	*
1	17531513	17532562	1050	*
1	17539601	17541011	1411	*
1	17545257	17545828	572	*
1	17550969	17552394	1426	*
1	17561235	17562072	838	*
1	17563933	17565098	1166	*
1	17569109	17570419	1311	*
1	17587619	17588840	1222	*
1	17606799	17607233	435	*
1	17624113	17625422	1310	*
1	17636562	17637007	446	*
1	17653702	17654260	559	*
1	17661427	17661927	501	*
1	17696357	17696808	452	*
1	17725087	17725745	659	*
1	17765507	17766453	947	*
1	17768502	17769323	822	*
1	17826098	17826564	467	*
1	17858039	17858512	474	*
1	17866150	17866891	742	*
1	17874154	17874955	802	*
1	18021998	18022743	746	*
1	18091868	18092440	573	*
1	18234796	18235138	343	*
1	18480265	18481221	957	*
1	18581444	18581773	330	*
1	18597269	18597903	635	*
1	18618338	18619192	855	*
1	18667835	18668449	615	*
1	18668803	18669146	344	*
1	18681387	18681713	327	*
1	18820611	18821133	523	*
1	18875060	18875752	693	*
1	18884141	18884599	459	*
1	18901979	18903402	1424	*
1	18912895	18913536	642	*
1	18922076	18922856	781	*
1	18926329	18927005	677	*
1	18941073	18942103	1031	*
1	18949466	18950399	934	*
1	18955523	18957431	1909	*
1	18962099	18962710	612	*
1	19009812	19011743	1932	*
1	19033873	19034539	667	*
1	19066845	19067874	1030	*
1	19096283	19096596	314	*
1	19113649	19114018	370	*
1	19203343	19203904	562	*
1	19209385	19211152	1768	*
1	19241103	19241587	485	*
1	19251311	19252703	1393	*
1	19288617	19289471	855	*
1	19311053	19313061	2009	*
1	19341476	19341875	400	*
1	19344383	19344733	351	*
1	19430152	19430710	559	*
1	19440460	19440899	440	*
1	19450480	19451428	949	*
1	19469405	19469962	558	*
1	19484324	19486369	2046	*
1	19596175	19597812	1638	*
1	19619710	19620094	385	*
1	19622116	19622615	500	*
1	19635694	19636310	617	*
1	19640074	19641161	1088	*
1	19643160	19645431	2272	*
1	19650909	19651496	588	*
1	19653530	19654136	607	*
1	19659654	19660158	505	*
1	19676457	19676968	512	*
1	19704364	19705059	696	*
1	19715299	19716151	853	*
1	19735785	19736203	419	*
1	19754304	19754932	629	*
1	19758161	19758902	742	*
1	19765407	19766074	668	*
1	19799272	19800597	1326	*
1	19809454	19809803	350	*
1	19861000	19861660	661	*
1	19863785	19864335	551	*
1	19866592	19867322	731	*
1	19881895	19883182	1288	*
1	19918033	19918410	378	*
1	19974748	19975126	379	*
1	20100753	20101320	568	*
1	20124321	20124969	649	*
1	20151980	20152721	742	*
1	20195122	20195516	395	*
1	20212975	20213365	391	*
1	20216656	20216967	312	*
1	20279477	20279977	501	*
1	20358560	20359280	721	*
1	20367116	20367471	356	*
1	20411205	20411601	397	*
1	20440815	20441138	324	*
1	20476211	20476783	573	*
1	20485269	20486500	1232	*
1	20493762	20494299	538	*
1	20507331	20508491	1161	*
1	20522314	20522855	542	*
1	20530871	20531613	743	*
1	20552373	20552655	283	*
1	20575109	20576159	1051	*
1	20576287	20576978	692	*
1	20588559	20590266	1708	*
1	20601225	20602088	864	*
1	20604177	20604770	594	*
1	20612026	20612792	767	*
1	20613419	20614289	871	*
1	20633265	20635025	1761	*
1	20639866	20640589	724	*
1	20661054	20662126	1073	*
1	20696381	20697392	1012	*
1	20717467	20718421	955	*
1	20731781	20733763	1983	*
1	20786082	20788271	2190	*
1	20847301	20848731	1431	*
1	20896649	20897332	684	*
1	21022130	21022949	820	*
1	21063914	21064590	677	*
1	21083086	21083687	602	*
1	21091088	21091473	386	*
1	21149420	21150545	1126	*
1	21175692	21177459	1768	*
1	21194936	21195734	799	*
1	21231977	21232343	367	*
1	21252219	21252521	303	*
1	21255208	21255745	538	*
1	21261478	21263068	1591	*
1	21289720	21290619	900	*
1	21294364	21295272	909	*
1	21302610	21303594	985	*
1	21308650	21309657	1008	*
1	21311134	21311407	274	*
1	21316942	21317854	913	*
1	21318587	21318979	393	*
1	21324196	21325131	936	*
1	21331858	21332653	796	*
1	21335788	21336222	435	*
1	21337886	21339573	1688	*
1	21344623	21346008	1386	*
1	21368229	21369087	859	*
1	21370577	21370960	384	*
1	21378877	21379697	821	*
1	21439719	21440485	767	*
1	21490707	21491187	481	*
1	21508850	21509587	738	*
1	21537669	21538669	1001	*
1	21539929	21540357	429	*
1	21541614	21542298	685	*
1	21573994	21575179	1186	*
1	21586622	21587618	997	*
1	21595502	21595850	349	*
1	21607510	21608411	902	*
1	21622154	21622941	788	*
1	21626803	21627407	605	*
1	21631878	21632616	739	*
1	21638472	21639961	1490	*
1	21651180	21652097	918	*
1	21659085	21659724	640	*
1	21703161	21703962	802	*
1	21764155	21765599	1445	*
1	21781899	21784119	2221	*
1	21801084	21801536	453	*
1	21818650	21819059	410	*
1	21861891	21862555	665	*
1	21869485	21870613	1129	*
1	21896681	21897489	809	*
1	21909255	21910447	1193	*
1	21915214	21915636	423	*
1	21920095	21921406	1312	*
1	21926879	21927962	1084	*
1	21930968	21931908	941	*
1	21935839	21937057	1219	*
1	21942940	21943464	525	*
1	21956407	21957422	1016	*
1	21963827	21964324	498	*
1	22005198	22005943	746	*
1	22019019	22019528	510	*
1	22024993	22026326	1334	*
1	22039601	22040385	785	*
1	22052348	22053978	1631	*
1	22131749	22132940	1192	*
1	22142064	22143026	963	*
1	22143079	22143889	811	*
1	22204847	22205634	788	*
1	22217787	22218288	502	*
1	22275650	22276380	731	*
1	22317286	22317803	518	*
1	22332022	22333492	1471	*
1	22341939	22342587	649	*
1	22387865	22388482	618	*
1	22388618	22389922	1305	*
1	22412648	22413664	1017	*
1	22413957	22414854	898	*
1	22420298	22420874	577	*
1	22428598	22429423	826	*
1	22447595	22448106	512	*
1	22451630	22452969	1340	*
1	22600410	22601066	657	*
1	22641870	22642376	507	*
1	22674118	22674464	347	*
1	22689467	22689951	485	*
1	22704458	22705015	558	*
1	22739475	22740329	855	*
1	22750142	22751044	903	*
1	22780725	22781060	336	*
1	22831767	22832650	884	*
1	22870284	22870960	677	*
1	22930206	22930727	522	*
1	22963753	22964549	797	*
1	22969253	22969748	496	*
1	22976354	22977025	672	*
1	23010483	23011317	835	*
1	23018912	23020423	1512	*
1	23020787	23021348	562	*
1	23100046	23100584	539	*
1	23122312	23122912	601	*
1	23167233	23169068	1836	*
1	23177374	23178254	881	*
1	23188192	23189327	1136	*
1	23194128	23195311	1184	*
1	23196734	23197428	695	*
1	23198303	23198783	481	*
1	23216721	23217883	1163	*
1	23224636	23225546	911	*
1	23273251	23274121	871	*
1	23282752	23283392	641	*
1	23343290	23345093	1804	*
1	23367529	23368644	1116	*
1	23368702	23370048	1347	*
1	23402926	23403447	522	*
1	23403481	23404455	975	*
1	23411416	23412379	964	*
1	23423501	23425009	1509	*
1	23451601	23452661	1061	*
1	23475167	23475676	510	*
1	23478813	23479391	579	*
1	23483277	23484952	1676	*
1	23496889	23497794	906	*
1	23528112	23528965	854	*
1	23530551	23531141	591	*
1	23531222	23531709	488	*
1	23539565	23540320	756	*
1	23544669	23545252	584	*
1	23554544	23555318	775	*
1	23555843	23557135	1293	*
1	23559185	23559802	618	*
1	23562102	23562649	548	*
1	23576540	23577980	1441	*
1	23585323	23586195	873	*
1	23586554	23587021	468	*
1	23591419	23592025	607	*
1	23593291	23594146	856	*
1	23619368	23620038	671	*
1	23634553	23635741	1189	*
1	23637298	23638004	707	*
1	23651016	23651742	727	*
1	23657691	23658024	334	*
1	23673139	23673857	719	*
1	23691445	23692421	977	*
1	23718498	23719195	698	*
1	23742945	23744258	1314	*
1	23751141	23751743	603	*
1	23771924	23772640	717	*
1	23777811	23778948	1138	*
1	23779776	23780386	611	*
1	23790094	23790575	482	*
1	23790729	23792109	1381	*
1	23799327	23801271	1945	*
1	23809673	23810235	563	*
1	23824768	23825817	1050	*
1	23838107	23838951	845	*
1	23867533	23868838	1306	*
1	23907596	23908429	834	*
1	23916776	23917193	418	*
1	23919805	23920521	717	*
1	23951418	23952261	844	*
1	23958912	23960243	1332	*
1	23979904	23981081	1178	*
1	24003321	24003925	605	*
1	24008383	24008884	502	*
1	24008961	24010140	1180	*
1	24018538	24019332	795	*
1	24022465	24023198	734	*
1	24027934	24028523	590	*
1	24045840	24047492	1653	*
1	24070810	24071361	552	*
1	24102855	24103416	562	*
1	24107838	24108245	408	*
1	24108633	24109323	691	*
1	24112373	24112892	520	*
1	24117573	24118154	582	*
1	24119777	24120862	1086	*
1	24142398	24143462	1065	*
1	24149751	24151034	1284	*
1	24157949	24158345	397	*
1	24186999	24187851	853	*
1	24191914	24192269	356	*
1	24201883	24202514	632	*
1	24236278	24237215	938	*
1	24266207	24267307	1101	*
1	24283566	24284419	854	*
1	24289613	24290535	923	*
1	24294220	24295476	1257	*
1	24321603	24322683	1081	*
1	24362978	24363403	426	*
1	24364467	24365772	1306	*
1	24391308	24391611	304	*
1	24413311	24413966	656	*
1	24415261	24416344	1084	*
1	24438394	24438959	566	*
1	24443269	24443724	456	*
1	24502088	24503256	1169	*
1	24515425	24516211	787	*
1	24541055	24541335	281	*
1	24559033	24559716	684	*
1	24587087	24587543	457	*
1	24635189	24635594	406	*
1	24642428	24644320	1893	*
1	24683486	24684398	913	*
1	24688546	24689095	550	*
1	24705087	24706018	932	*
1	24713056	24713756	701	*
1	24718918	24719252	335	*
1	24744820	24746099	1280	*
1	24769889	24770636	748	*
1	24786082	24786761	680	*
1	24793810	24794367	558	*
1	24830663	24831050	388	*
1	24847747	24848823	1077	*
1	24862029	24862908	880	*
1	24897891	24898495	605	*
1	24929450	24930702	1253	*
1	24932186	24932630	445	*
1	24949187	24949800	614	*
1	24968969	24969299	331	*
1	25017403	25017999	597	*
1	25022119	25023281	1163	*
1	25031838	25032748	911	*
1	25101433	25102006	574	*
1	25182556	25182964	409	*
1	25231987	25233604	1618	*
1	25239481	25240507	1027	*
1	25246918	25248144	1227	*
1	25267537	25268359	823	*
1	25338050	25339235	1186	*
1	25352157	25352577	421	*
1	25371407	25372308	902	*
1	25429876	25431484	1609	*
1	25506586	25507311	726	*
1	25523550	25523891	342	*
1	25543273	25544259	987	*
1	25544610	25545131	522	*
1	25549298	25550170	873	*
1	25556478	25557267	790	*
1	25568337	25569305	969	*
1	25572756	25573263	508	*
1	25573421	25573919	499	*
1	25608461	25608920	460	*
1	25615870	25617272	1403	*
1	25688346	25689252	907	*
1	25694244	25695501	1258	*
1	25695931	25696345	415	*
1	25743311	25744537	1227	*
1	25799796	25800886	1091	*
1	25810677	25811283	607	*
1	25819520	25821102	1583	*
1	25858387	25859902	1516	*
1	25874701	25876282	1582	*
1	25890314	25890878	565	*
1	25892223	25892930	708	*
1	25895363	25895738	376	*
1	25905024	25905323	300	*
1	25905373	25907160	1788	*
1	25922638	25923491	854	*
1	25997516	25998723	1208	*
1	26034917	26036374	1458	*
1	26094181	26095232	1052	*
1	26110700	26112677	1978	*
1	26144816	26145655	840	*
1	26161605	26162375	771	*
1	26169567	26170682	1116	*
1	26177071	26177670	600	*
1	26218903	26219657	755	*
1	26233605	26235298	1694	*
1	26279536	26280709	1174	*
1	26284770	26285398	629	*
1	26306115	26307281	1167	*
1	26321157	26321958	802	*
1	26336130	26337125	996	*
1	26358757	26359302	546	*
1	26377895	26378944	1050	*
1	26391466	26391872	407	*
1	26405187	26405795	609	*
1	26416889	26417553	665	*
1	26431858	26432888	1031	*
1	26471447	26473356	1910	*
1	26500042	26501770	1729	*
1	26529356	26531638	2283	*
1	26620065	26621751	1687	*
1	26636423	26637240	818	*
1	26677305	26678068	764	*
1	26692236	26693376	1141	*
1	26695309	26696385	1077	*
1	26697855	26698506	652	*
1	26705528	26706628	1101	*
1	26723242	26724096	855	*
1	26771308	26772282	975	*
1	26783985	26784394	410	*
1	26786878	26787169	292	*
1	26787342	26788754	1413	*
1	26799508	26800364	857	*
1	26826138	26827602	1465	*
1	26848810	26849880	1071	*
1	26853111	26853441	331	*
1	26862738	26865718	2981	*
1	26877987	26878347	361	*
1	26889572	26890695	1124	*
1	26899406	26900694	1289	*
1	26907143	26907990	848	*
1	26921241	26922496	1256	*
1	26966710	26967424	715	*
1	26993235	26994461	1227	*
1	26997676	26998131	456	*
1	26998949	27000052	1104	*
1	27009301	27010302	1002	*
1	27010798	27011391	594	*
1	27012670	27013250	581	*
1	27031272	27031964	693	*
1	27044475	27045077	603	*
1	27045749	27046227	479	*
1	27097412	27097735	324	*
1	27098985	27100153	1169	*
1	27111900	27112545	646	*
1	27122432	27123086	655	*
1	27141577	27142142	566	*
1	27154586	27155747	1162	*
1	27192042	27192440	399	*
1	27192470	27193126	657	*
1	27197916	27198516	601	*
1	27233989	27235793	1805	*
1	27284710	27285183	474	*
1	27296695	27297188	494	*
1	27300625	27301314	690	*
1	27306826	27307541	716	*
1	27321844	27322776	933	*
1	27349212	27350370	1159	*
1	27365290	27367374	2085	*
1	27392107	27393008	902	*
1	27395370	27395802	433	*
1	27416541	27417000	460	*
1	27436314	27437065	752	*
1	27489567	27490935	1369	*
1	27496671	27497184	514	*
1	27504181	27505398	1218	*
1	27528097	27529382	1286	*
1	27540019	27540934	916	*
1	27542268	27543170	903	*
1	27556771	27558384	1614	*
1	27568170	27569281	1112	*
1	27575235	27576253	1019	*
1	27589609	27590597	989	*
1	27590935	27591631	697	*
1	27601717	27602486	770	*
1	27603443	27604403	961	*
1	27643740	27644238	499	*
1	27650582	27651215	634	*
1	27658787	27660335	1549	*
1	27663039	27663516	478	*
1	27671878	27672958	1081	*
1	27686252	27687143	892	*
1	27725307	27726607	1301	*
1	27772729	27773979	1251	*
1	27817033	27817728	696	*
1	27830389	27831786	1398	*
1	27858015	27858800	786	*
1	27872158	27873029	872	*
1	27875146	27875678	533	*
1	27914043	27915097	1055	*
1	27934727	27935344	618	*
1	27959370	27960446	1077	*
1	27968685	27969063	379	*
1	27979616	27980153	538	*
1	28087684	28089148	1465	*
1	28104899	28105557	659	*
1	28153081	28153517	437	*
1	28208805	28209205	401	*
1	28232513	28233172	660	*
1	28235604	28237101	1498	*
1	28247086	28247731	646	*
1	28248125	28249296	1172	*
1	28249413	28249850	438	*
1	28259049	28260784	1736	*
1	28296674	28297202	529	*
[truncated: 68,172 more rows]

## Sheet: 24h VH298
seqnames	start	end	width	strand
[truncated: 64,336 more rows]
