# Supplementary material for: Regulation of chromatin accessibility by hypoxia and HIF
Source: Biochem J. 2022 Mar 28;479(6):767–86. doi: 10.1042/BCJ20220008 (PMC9022986; doi:10.1042/BCJ20220008)
Supplement: Supplementary Material 3 [file BCJ-479-767-s3.pdf]

## Sheet: 1h Hpx 
seqnames	start	end	width	strand	Conc	Conc_1hpx	Conc_0hpx	Fold	p.value	FDR	annotation	geneChr	geneStart	geneEnd	geneLength	geneStrand	geneId	transcriptId	distanceToTSS	ENTREZID	SYMBOL
18	35435908	35436703	796	*	9.75	10.02	9.41	0.62	6.72e-11	2.76e-06	Distal Intergenic	463	35403996	35406528	2533	2	ENSG00000275512	ENST00000612496	-29380	NA	NA	NA
20	62860357	62862325	1969	*	11.25	11.48	10.98	0.5	9.22e-11	2.76e-06	Promoter (<=1kb)	465	62841005	62861822	20818	2	ENSG00000101190	ENST00000335351	0	10732	TCFL5	transcription factor like 5
5	40381689	40382515	827	*	11.07	11.28	10.83	0.44	4.56e-10	9.11e-06	Distal Intergenic	450	40415137	40431491	16355	1	ENSG00000283286	ENST00000637776	-32622	NA	NA	NA
20	35771717	35772549	833	*	11.72	11.94	11.46	0.48	3.37e-09	4.63e-05	Promoter (<=1kb)	465	35771974	35863400	91427	1	ENSG00000025293	ENST00000461122	0	51230	PHF20	PHD finger protein 20
20	63739256	63739852	597	*	10.63	10.87	10.35	0.52	3.86e-09	4.63e-05	Promoter (<=1kb)	465	63739776	63744050	4275	1	ENSG00000125520	ENST00000266077	0	56731	SLC2A4RG	SLC2A4 regulator
17	31858159	31859899	1741	*	11.09	11.29	10.86	0.43	4.9e-09	4.89e-05	Promoter (<=1kb)	462	31851871	31859074	7204	2	ENSG00000172301	ENST00000378634	0	55352	COPRS	coordinator of PRMT5 and differentiation stimulator
17	59769607	59770383	777	*	9.14	9.43	8.78	0.65	1.16e-08	9.93e-05	Intron (ENST00000593168/ENSG00000062716, intron 4 of 4)	462	59773754	59840024	66271	1	ENSG00000062716	ENST00000591877	-3371	81671	VMP1	vacuole membrane protein 1
20	58888526	58889549	1024	*	10.68	10.87	10.46	0.41	5.93e-08	0.000444	Promoter (<=1kb)	465	58888779	58910401	21623	1	ENSG00000087460	ENST00000488546	0	2778	GNAS	GNAS complex locus
20	58980703	58982184	1482	*	11.3	11.49	11.08	0.41	1.16e-07	0.000758	Promoter (<=1kb)	465	58981208	58995131	13924	1	ENSG00000101158	ENST00000602795	0	51497	NELFCD	negative elongation factor complex member C/D
2	101150555	101151802	1248	*	11.01	11.21	10.78	0.43	1.26e-07	0.000758	Promoter (<=1kb)	447	101007228	101151382	144155	2	ENSG00000204634	ENST00000409318	0	11138	TBC1D8	TBC1 domain family member 8
3	125511824	125512960	1137	*	10.12	10.32	9.88	0.44	3.98e-07	0.00208	Intron (ENST00000251775/ENSG00000114520, intron 1 of 13)	448	125516979	125517086	108	1	ENSG00000201800	ENST00000364930	-4019	NA	NA	NA
16	88452589	88453444	856	*	11.37	11.57	11.13	0.43	4.48e-07	0.00208	Promoter (<=1kb)	461	88453280	88537031	83752	1	ENSG00000179588	ENST00000319555	0	161882	ZFPM1	zinc finger protein, FOG family member 1
5	39639497	39640215	719	*	9.09	9.38	8.73	0.65	4.66e-07	0.00208	Distal Intergenic	450	39571478	39572639	1162	2	ENSG00000251515	ENST00000503137	-66858	NA	NA	NA
16	2537348	2538420	1073	*	11.24	11.43	11.04	0.39	5.16e-07	0.00208	Promoter (<=1kb)	461	2537979	2581661	43683	1	ENSG00000140992	ENST00000566659	0	5170	PDPK1	3-phosphoinositide dependent protein kinase 1
3	70857534	70858356	823	*	10	10.21	9.76	0.44	5.19e-07	0.00208	Distal Intergenic	448	70808350	70808452	103	1	ENSG00000206939	ENST00000384212	49184	NA	NA	NA
1	151195057	151196618	1562	*	11.51	11.67	11.34	0.34	7.9e-07	0.00296	Promoter (<=1kb)	446	151185540	151195321	9782	2	ENSG00000163159	ENST00000463470	0	6944	VPS72	vacuolar protein sorting 72 homolog
3	171844837	171845782	946	*	9.05	9.31	8.74	0.57	9.74e-07	0.00344	Promoter (1-2kb)	448	171843516	171856974	13459	1	ENSG00000186329	ENST00000450693	1321	389177	TMEM212	transmembrane protein 212
1	98088365	98088974	610	*	8.6	8.89	8.22	0.67	1.04e-06	0.00347	Distal Intergenic	446	98077000	98077468	469	1	ENSG00000233557	ENST00000448700	11365	NA	NA	NA
22	24683562	24684453	892	*	10.2	10.4	9.97	0.43	1.4e-06	0.0039	Promoter (1-2kb)	467	24686168	24686679	512	1	ENSG00000224806	ENST00000430731	-1715	NA	NA	NA
13	83618791	83619364	574	*	8.64	8.92	8.28	0.64	1.41e-06	0.0039	Distal Intergenic	458	83650249	83654789	4541	2	ENSG00000286446	ENST00000657985	35425	NA	NA	NA
7	5282782	5283306	525	*	8.34	8.69	7.89	0.79	1.53e-06	0.0039	Promoter (<=1kb)	452	5282930	5306870	23941	1	ENSG00000164638	ENST00000396872	0	222962	SLC29A4	solute carrier family 29 member 4
9	21677486	21678269	784	*	10.34	10.52	10.12	0.4	1.53e-06	0.0039	Distal Intergenic	454	21695176	21696943	1768	1	ENSG00000229835	ENST00000427983	-16907	NA	NA	NA
16	4580032	4580838	807	*	9.11	9.36	8.8	0.55	1.53e-06	0.0039	Exon (ENST00000444310/ENSG00000205832, exon 7 of 16)	461	4562814	4563128	315	2	ENSG00000261612	ENST00000564581	-16904	NA	NA	NA
10	930588	932367	1780	*	11.72	11.91	11.51	0.4	1.56e-06	0.0039	Promoter (<=1kb)	455	809497	931705	122209	2	ENSG00000107929	ENST00000316157	0	23185	LARP4B	La ribonucleoprotein 4B
2	142833433	142834609	1177	*	9.1	9.36	8.78	0.58	1.79e-06	0.00429	Distal Intergenic	447	142854095	142855998	1904	1	ENSG00000229781	ENST00000428909	-19486	NA	NA	NA
4	45946526	45947387	862	*	8.88	9.15	8.54	0.6	2.05e-06	0.00452	Distal Intergenic	449	45995119	45995423	305	1	ENSG00000222257	ENST00000410325	-47732	NA	NA	NA
5	20007192	20008060	869	*	10	10.22	9.74	0.48	2.08e-06	0.00452	Intron (ENST00000507958/ENSG00000145526, intron 2 of 14)	450	19502682	19988207	485526	2	ENSG00000145526	ENST00000511273	-18985	1016	CDH18	cadherin 18
22	44701759	44703113	1355	*	10.51	10.7	10.29	0.42	2.11e-06	0.00452	Promoter (<=1kb)	467	44702204	44737681	35478	1	ENSG00000186654	ENST00000336985	0	55615	PRR5	proline rich 5
7	39844888	39845649	762	*	8.76	9.03	8.42	0.61	2.3e-06	0.00475	Intron (ENST00000413879/ENSG00000237251, intron 3 of 4)	452	39854494	39855056	563	2	ENSG00000175741	ENST00000426392	9407	NA	NA	NA
15	79792852	79793505	654	*	8.84	9.11	8.51	0.6	2.64e-06	0.00527	Distal Intergenic	460	79817349	79817450	102	2	ENSG00000252995	ENST00000517186	23945	NA	NA	NA
2	235493513	235494465	953	*	10.53	10.74	10.28	0.46	2.81e-06	0.00544	Promoter (<=1kb)	447	235494043	236131793	637751	1	ENSG00000157985	ENST00000304032	0	116987	AGAP1	ArfGAP with GTPase domain, ankyrin repeat and PH domain 1
8	129786519	129787844	1326	*	9.89	10.09	9.66	0.43	2.93e-06	0.0055	Promoter (<=1kb)	453	129748196	129786624	38429	2	ENSG00000147697	ENST00000276708	0	56169	GSDMC	gasdermin C
7	91465400	91466129	730	*	9.34	9.57	9.06	0.5	3.15e-06	0.00571	Intron (ENST00000418395/ENSG00000243144, intron 2 of 5)	452	91455722	91514547	58826	1	ENSG00000243144	ENST00000660007	9678	NA	NA	NA
1	150149350	150150416	1067	*	10.33	10.52	10.12	0.41	3.29e-06	0.0058	Promoter (<=1kb)	446	150149916	150160065	10150	1	ENSG00000023902	ENST00000369124	0	51177	PLEKHO1	pleckstrin homology domain containing O1
7	2631451	2632443	993	*	10.99	11.17	10.78	0.39	4.54e-06	0.00778	Promoter (<=1kb)	452	2631986	2664802	32817	1	ENSG00000136295	ENST00000258796	0	80727	TTYH3	tweety family member 3
3	115800026	115801024	999	*	9.87	10.06	9.64	0.42	4.92e-06	0.00819	Downstream (1-2kb)	448	115837870	115838159	290	1	ENSG00000243359	ENST00000470970	-36846	NA	NA	NA
8	141307014	141308864	1851	*	11.02	11.19	10.83	0.36	5.18e-06	0.00839	Promoter (<=1kb)	453	141207174	141308288	101115	2	ENSG00000022567	ENST00000517878	0	57210	SLC45A4	solute carrier family 45 member 4
3	52636517	52637357	841	*	8.71	8.98	8.38	0.6	5.56e-06	0.00877	Intron (ENST00000356770/ENSG00000163939, intron 9 of 27)	448	52609086	52615399	6314	2	ENSG00000163939	ENST00000480064	-21118	55193	PBRM1	polybromo 1
5	92019267	92019892	626	*	9.29	9.51	9.03	0.49	6.65e-06	0.0102	Distal Intergenic	450	92082597	92479426	396830	1	ENSG00000250049	ENST00000507217	-62705	NA	NA	NA
5	19854755	19855414	660	*	9.68	9.88	9.44	0.44	6.79e-06	0.0102	Intron (ENST00000382275/ENSG00000145526, intron 2 of 12)	450	19473048	19839244	366197	2	ENSG00000145526	ENST00000274170	-15511	1016	CDH18	cadherin 18
1	107702809	107703642	834	*	10.23	10.41	10.03	0.38	6.98e-06	0.0102	Intron (ENST00000370056/ENSG00000134215, intron 17 of 26)	446	107609814	107688528	78715	2	ENSG00000134215	ENST00000479977	-14281	10451	VAV3	vav guanine nucleotide exchange factor 3
9	135967168	135968126	959	*	9.94	9.71	10.13	-0.42	7.36e-06	0.0105	Distal Intergenic	454	135932969	135961373	28405	2	ENSG00000130560	ENST00000371756	-5795	10422	UBAC1	UBA domain containing 1
5	26894617	26895325	709	*	9.82	10.02	9.59	0.42	7.52e-06	0.0105	Intron (ENST00000231021/ENSG00000113100, intron 7 of 11)	450	26880686	26890833	10148	2	ENSG00000113100	ENST00000505020	-3784	1007	CDH9	cadherin 9
7	84237373	84238147	775	*	9.42	9.64	9.17	0.47	8.74e-06	0.0119	Intron (ENST00000448879/ENSG00000075213, intron 4 of 4)	452	83961301	84195445	234145	2	ENSG00000075213	ENST00000436949	-41928	10371	SEMA3A	semaphorin 3A
2	43412020	43412805	786	*	8.68	8.95	8.36	0.58	9.82e-06	0.0131	Intron (ENST00000405975/ENSG00000115970, intron 28 of 37)	447	43408307	43408412	106	1	ENSG00000252804	ENST00000516995	3713	NA	NA	NA
14	34035242	34036296	1055	*	9.62	9.83	9.38	0.44	1.05e-05	0.0137	Intron (ENST00000487915/ENSG00000129521, intron 4 of 5)	459	34040097	34059300	19204	1	ENSG00000258897	ENST00000555922	-3801	NA	NA	NA
1	44968009	44968744	736	*	10.3	10.48	10.11	0.37	1.13e-05	0.0144	Intron (ENST00000360403/ENSG00000070785, intron 3 of 11)	446	44958557	44959395	839	1	ENSG00000229815	ENST00000428976	9452	NA	NA	NA
1	69513299	69514141	843	*	7.96	8.29	7.55	0.73	1.17e-05	0.0147	Distal Intergenic	446	69551848	69563715	11868	1	ENSG00000287453	ENST00000662276	-37707	NA	NA	NA
21	42973810	42975810	2001	*	12.33	12.5	12.15	0.34	1.31e-05	0.016	Promoter (<=1kb)	466	42974510	43033931	59422	1	ENSG00000160199	ENST00000432907	0	5316	PKNOX1	PBX/knotted 1 homeobox 1
19	1568305	1568645	341	*	8.52	8.79	8.19	0.6	1.38e-05	0.0165	Promoter (<=1kb)	464	1554669	1568058	13390	2	ENSG00000181588	ENST00000402693	-247	399664	MEX3D	mex-3 RNA binding family member D
5	13359325	13359744	420	*	9.18	9.4	8.91	0.49	1.41e-05	0.0166	Distal Intergenic	450	13250235	13250662	428	2	ENSG00000242608	ENST00000495419	-108663	NA	NA	NA
5	39138895	39139276	382	*	8.39	8.68	8.04	0.64	1.49e-05	0.0171	Promoter (<=1kb)	450	39137404	39140030	2627	2	ENSG00000082074	ENST00000644817	754	2533	FYB1	FYN binding protein 1
17	65749312	65749901	590	*	9.53	9.74	9.28	0.46	1.56e-05	0.0174	Promoter (<=1kb)	462	65635816	65750724	114909	2	ENSG00000154240	ENST00000581739	823	201134	CEP112	centrosomal protein 112
5	28313320	28314500	1181	*	10.37	10.57	10.14	0.43	1.57e-05	0.0174	Distal Intergenic	450	28285964	28287807	1844	2	ENSG00000249785	ENST00000664667	-25513	105374698	LINC02103	long intergenic non-protein coding RNA 2103
6	55918525	55919030	506	*	8.3	8.6	7.93	0.68	1.63e-05	0.0176	Distal Intergenic	451	55939790	55940624	835	2	ENSG00000214604	ENST00000415681	21594	NA	NA	NA
1	112543982	112545227	1246	*	9.81	10.03	9.55	0.48	1.65e-05	0.0176	Promoter (2-3kb)	446	112525876	112541975	16100	2	ENSG00000007341	ENST00000498197	-2007	54879	ST7L	suppression of tumorigenicity 7 like
1	143803712	143804606	895	*	8.04	7.65	8.36	-0.71	1.67e-05	0.0176	Distal Intergenic	446	143791542	143791687	146	2	ENSG00000252105	ENST00000516296	-12025	NA	NA	NA
5	23703909	23704937	1029	*	9.6	9.81	9.35	0.46	1.85e-05	0.0191	Distal Intergenic	450	23688927	23689386	460	1	ENSG00000249607	ENST00000511286	14982	NA	NA	NA
5	19240012	19240731	720	*	9.04	9.27	8.77	0.5	1.94e-05	0.0195	Distal Intergenic	450	19233366	19234487	1122	1	ENSG00000249557	ENST00000505573	6646	NA	NA	NA
14	64568826	64569982	1157	*	10.19	10.36	10	0.37	1.95e-05	0.0195	Intron (ENST00000467261/ENSG00000165807, intron 8 of 12)	459	64586108	64589380	3273	1	ENSG00000165807	ENST00000554400	-16126	145376	PPP1R36	protein phosphatase 1 regulatory subunit 36
3	58234576	58234956	381	*	8.6	8.86	8.28	0.59	2.05e-05	0.0202	Promoter (2-3kb)	448	58237532	58294734	57203	1	ENSG00000163686	ENST00000295962	-2576	57406	ABHD6	abhydrolase domain containing 6
5	19853625	19854404	780	*	10.48	10.64	10.3	0.34	2.16e-05	0.0209	Intron (ENST00000382275/ENSG00000145526, intron 2 of 12)	450	19473048	19839244	366197	2	ENSG00000145526	ENST00000274170	-14381	1016	CDH18	cadherin 18
3	11212006	11212613	608	*	8.54	8.81	8.22	0.58	2.41e-05	0.0226	Intron (ENST00000438284/ENSG00000196639, intron 1 of 1)	448	11193629	11225839	32211	2	ENSG00000285906	ENST00000658562	13226	NA	NA	NA
4	65383371	65384340	970	*	9.31	9.52	9.06	0.46	2.45e-05	0.0226	Intron (ENST00000273854/ENSG00000145242, intron 8 of 17)	449	65225867	65241814	15948	2	ENSG00000285711	ENST00000649562	-141557	105377256	LINC02835	long intergenic non-protein coding RNA 2835
7	70614401	70615199	799	*	8.66	8.35	8.92	-0.57	2.47e-05	0.0226	Intron (ENST00000644939/ENSG00000158321, intron 5 of 18)	452	70596085	70792485	196401	1	ENSG00000158321	ENST00000644506	18316	26053	AUTS2	activator of transcription and developmental regulator AUTS2
20	62065494	62066872	1379	*	10.85	11.01	10.66	0.35	2.57e-05	0.0226	Promoter (<=1kb)	465	61974798	62065810	91013	2	ENSG00000130699	ENST00000252996	0	6874	TAF4	TATA-box binding protein associated factor 4
1	199733050	199733776	727	*	8.03	8.34	7.64	0.7	2.58e-05	0.0226	Distal Intergenic	446	199752491	199752890	400	1	ENSG00000231984	ENST00000448132	-18715	NA	NA	NA
7	19284289	19285307	1019	*	7.77	8.11	7.34	0.76	2.62e-05	0.0226	Distal Intergenic	452	19353531	19356026	2496	1	ENSG00000223838	ENST00000659464	-68224	NA	NA	NA
9	129610479	129611275	797	*	10.6	10.43	10.76	-0.33	2.63e-05	0.0226	Promoter (1-2kb)	454	129608884	129635930	27047	1	ENSG00000148335	ENST00000372486	1595	28989	NTMT1	N-terminal Xaa-Pro-Lys N-methyltransferase 1
9	33779534	33780280	747	*	10.5	10.66	10.33	0.33	2.64e-05	0.0226	Intron (ENST00000468152/ENSG00000010438, intron 2 of 3)	454	33786221	33786828	608	1	ENSG00000223394	ENST00000427589	-5941	NA	NA	NA
12	124993442	124994859	1418	*	10.71	10.87	10.53	0.34	2.78e-05	0.023	Promoter (<=1kb)	457	124993645	125031231	37587	1	ENSG00000184992	ENST00000341446	0	140707	BRI3BP	BRI3 binding protein
14	66974400	66975720	1321	*	9.86	10.06	9.62	0.44	2.79e-05	0.023	Intron (ENST00000315266/ENSG00000171723, intron 8 of 21)	459	66969038	66969816	779	2	ENSG00000258490	ENST00000555850	-4584	NA	NA	NA
2	154143649	154144658	1010	*	8.65	8.91	8.34	0.57	2.82e-05	0.023	Intron (ENST00000392825/ENSG00000144278, intron 4 of 12)	447	154140341	154409340	269000	1	ENSG00000144278	ENST00000431076	3308	114805	GALNT13	polypeptide N-acetylgalactosaminyltransferase 13
3	182979620	182981043	1424	*	10.77	10.95	10.58	0.37	2.83e-05	0.023	Promoter (<=1kb)	448	182938074	182980538	42465	2	ENSG00000043093	ENST00000292782	0	54165	DCUN1D1	defective in cullin neddylation 1 domain containing 1
9	27156896	27157733	838	*	9.55	9.76	9.3	0.46	3.09e-05	0.0247	Intron (ENST00000519097/ENSG00000120156, intron 1 of 20)	454	27198287	27198401	115	1	ENSG00000223162	ENST00000411230	-40554	NA	NA	NA
10	28124071	28124693	623	*	9.47	9.67	9.25	0.43	3.24e-05	0.0256	Exon (ENST00000337532/ENSG00000150054, exon 9 of 18)	455	28125010	28203232	78223	2	ENSG00000150054	ENST00000474731	78539	143098	MPP7	membrane palmitoylated protein 7
1	23777809	23778882	1074	*	11.04	10.87	11.18	-0.31	3.3e-05	0.0257	Promoter (<=1kb)	446	23778418	23788232	9815	1	ENSG00000057757	ENST00000246151	0	57095	PITHD1	PITH domain containing 1
8	79943801	79944465	665	*	7.75	8.08	7.33	0.75	3.46e-05	0.0266	Intron (ENST00000276585/ENSG00000147586, intron 2 of 2)	453	79956465	79957381	917	2	ENSG00000272518	ENST00000606512	12916	NA	NA	NA
9	6566127	6567637	1511	*	10.86	11.01	10.7	0.3	3.58e-05	0.0267	Promoter (<=1kb)	454	6532467	6566517	34051	2	ENSG00000178445	ENST00000640505	0	2731	GLDC	glycine decarboxylase
3	175267087	175267786	700	*	8.2	8.49	7.83	0.66	3.6e-05	0.0267	Intron (ENST00000454872/ENSG00000177694, intron 4 of 13)	448	175234861	175271096	36236	2	ENSG00000226779	ENST00000424690	3310	NA	NA	NA
5	14908010	14909097	1088	*	12.21	12.33	12.07	0.26	3.64e-05	0.0267	Distal Intergenic	450	14877667	14877919	253	2	ENSG00000250662	ENST00000515300	-30091	NA	NA	NA
1	121417302	121417879	578	*	8.31	8.59	7.97	0.62	3.68e-05	0.0267	Intron (ENST00000417218/ENSG00000227082, intron 1 of 1)	446	121412719	121429274	16556	1	ENSG00000227082	ENST00000445260	4583	107985194	LINC02798	long intergenic non-protein coding RNA 2798
22	37745688	37746372	685	*	10.6	10.76	10.41	0.35	3.7e-05	0.0267	Promoter (<=1kb)	467	37746233	37774140	27908	1	ENSG00000100106	ENST00000403663	0	11078	TRIOBP	TRIO and F-actin binding protein
1	85343586	85344186	601	*	8.85	9.08	8.57	0.51	3.81e-05	0.0272	Intron (ENST00000654182/ENSG00000223653, intron 2 of 2)	446	85321452	85404528	83077	2	ENSG00000153904	ENST00000633113	60342	23576	DDAH1	dimethylarginine dimethylaminohydrolase 1
5	13745359	13745907	549	*	9.21	9.42	8.95	0.47	4.16e-05	0.0294	Intron (ENST00000265104/ENSG00000039139, intron 65 of 78)	450	13762751	13771282	8532	2	ENSG00000039139	ENST00000504001	25375	1767	DNAH5	dynein axonemal heavy chain 5
7	35198295	35199326	1032	*	8.78	9.02	8.5	0.52	4.36e-05	0.0304	Distal Intergenic	452	35081593	35186041	104449	2	ENSG00000189212	ENST00000454445	-12254	NA	NA	NA
6	84192917	84193791	875	*	9.99	10.16	9.79	0.37	4.48e-05	0.0308	Promoter (1-2kb)	451	84124241	84195030	70790	2	ENSG00000135315	ENST00000461137	1239	22832	CEP162	centrosomal protein 162
14	80973873	80975012	1140	*	11.09	10.94	11.23	-0.3	4.58e-05	0.0308	Intron (ENST00000541158/ENSG00000165409, intron 2 of 10)	459	80981988	80983638	1651	1	ENSG00000258915	ENST00000553845	-6976	NA	NA	NA
5	177194195	177194922	728	*	10.19	10.35	10.01	0.34	4.62e-05	0.0308	Intron (ENST00000510954/ENSG00000165671, intron 4 of 4)	450	177212111	177239865	27755	1	ENSG00000165671	ENST00000375350	-17189	64324	NSD1	nuclear receptor binding SET domain protein 1
8	95151352	95152346	995	*	8.58	8.85	8.24	0.61	4.63e-05	0.0308	Intron (ENST00000315367/ENSG00000175895, intron 1 of 1)	453	95134076	95154918	20843	1	ENSG00000175895	ENST00000519516	17276	79666	PLEKHF2	pleckstrin homology and FYVE domain containing 2
12	85016366	85016885	520	*	8.7	8.96	8.39	0.58	4.79e-05	0.0313	Promoter (<=1kb)	457	85014317	85016301	1985	2	ENSG00000231738	ENST00000529820	-65	144448	TSPAN19	tetraspanin 19
9	83537666	83539007	1342	*	11.25	11.11	11.38	-0.27	4.84e-05	0.0313	Promoter (<=1kb)	454	83242990	83538546	295557	2	ENSG00000172159	ENST00000376438	0	257019	FRMD3	FERM domain containing 3
5	145244760	145245814	1055	*	10.09	10.26	9.9	0.36	4.85e-05	0.0313	Distal Intergenic	450	145222610	145228982	6373	2	ENSG00000251031	ENST00000504204	-15778	NA	NA	NA
16	58264817	58265519	703	*	8.8	9.04	8.52	0.51	5.01e-05	0.0317	Intron (ENST00000219299/ENSG00000103021, intron 6 of 8)	461	58249988	58252767	2780	1	ENSG00000103021	ENST00000566498	14829	29070	CCDC113	coiled-coil domain containing 113
X	143853517	143854686	1170	*	8	8.3	7.62	0.69	5.07e-05	0.0317	Distal Intergenic	468	143884071	143885255	1185	1	ENSG00000276380	ENST00000618570	-29385	389898	UBE2NL	ubiquitin conjugating enzyme E2 N like (gene/pseudogene)
12	9064075	9065565	1491	*	11.81	11.67	11.93	-0.27	5.08e-05	0.0317	Promoter (<=1kb)	457	9055589	9065070	9482	2	ENSG00000214851	ENST00000538094	0	253128	LINC00612	long intergenic non-protein coding RNA 612
18	24868672	24869604	933	*	9.76	9.94	9.56	0.38	5.16e-05	0.0319	Intron (ENST00000661125/ENSG00000266573, intron 2 of 3)	463	24954207	24987665	33459	2	ENSG00000264345	ENST00000582697	118061	105372030	LINC01894	long intergenic non-protein coding RNA 1894
14	69610809	69612611	1803	*	11.59	11.72	11.44	0.28	5.37e-05	0.0328	Promoter (<=1kb)	459	69611596	69715144	103549	1	ENSG00000100647	ENST00000342745	0	9766	SUSD6	sushi domain containing 6
17	79811344	79812028	685	*	10	9.8	10.17	-0.37	5.57e-05	0.0337	Distal Intergenic	462	79819083	79827020	7938	1	ENSG00000262772	ENST00000667764	-7055	NA	NA	NA
22	30386549	30387863	1315	*	10.71	10.86	10.55	0.31	5.62e-05	0.0337	Promoter (<=1kb)	467	30378821	30387411	8591	2	ENSG00000099999	ENST00000382363	0	200312	RNF215	ring finger protein 215
2	159711854	159713170	1317	*	11.66	11.51	11.8	-0.29	5.68e-05	0.0337	Promoter (<=1kb)	447	159712457	159768583	56127	1	ENSG00000136536	ENST00000539065	0	64844	MARCHF7	membrane associated ring-CH-type finger 7
12	14841687	14842385	699	*	9.98	10.16	9.79	0.37	5.81e-05	0.0341	Promoter (<=1kb)	457	14841092	14844708	3617	1	ENSG00000256339	ENST00000444324	595	NA	NA	NA
10	133257492	133258654	1163	*	10.57	10.4	10.72	-0.32	6.03e-05	0.0351	Promoter (<=1kb)	455	133257144	133257551	408	2	ENSG00000273980	ENST00000611956	0	NA	NA	NA
X	44319297	44320100	804	*	8.87	9.11	8.59	0.52	6.24e-05	0.036	Intron (ENST00000420999/ENSG00000183690, intron 1 of 14)	468	44309314	44310476	1163	2	ENSG00000214018	ENST00000426279	-8821	NA	NA	NA
18	12606686	12607700	1015	*	9.4	9.59	9.16	0.43	6.39e-05	0.0363	Intron (ENST00000409402/ENSG00000134278, intron 2 of 16)	463	12449506	12636340	186835	2	ENSG00000134278	ENST00000440472	28640	56907	SPIRE1	spire type actin nucleation factor 1
5	14265567	14265916	350	*	10.34	10.5	10.17	0.34	6.41e-05	0.0363	Intron (ENST00000344204/ENSG00000038382, intron 1 of 56)	450	14290977	14297513	6537	1	ENSG00000038382	ENST00000504606	-25061	7204	TRIO	trio Rho guanine nucleotide exchange factor
1	66944394	66945222	829	*	10.16	10.33	9.98	0.35	6.47e-05	0.0363	Intron (ENST00000355977/ENSG00000198160, intron 3 of 13)	446	66932652	66959750	27099	1	ENSG00000198160	ENST00000479067	11742	57708	MIER1	MIER1 transcriptional regulator
5	20156839	20157481	643	*	8.49	8.75	8.16	0.6	6.9e-05	0.0382	Promoter (1-2kb)	450	20158662	20158956	295	2	ENSG00000248766	ENST00000514549	1475	NA	NA	NA
17	17859902	17860733	832	*	9.71	9.5	9.89	-0.39	6.95e-05	0.0382	Promoter (1-2kb)	462	17858227	17860041	1815	1	ENSG00000197815	ENST00000354746	1675	NA	NA	NA
7	159030452	159031478	1027	*	10.21	10.03	10.37	-0.34	7.06e-05	0.0382	3' UTR	452	159017408	159030195	12788	1	ENSG00000231419	ENST00000413238	13044	154822	LINC00689	long intergenic non-protein coding RNA 689
1	118661856	118662452	597	*	9.49	9.68	9.27	0.41	7.09e-05	0.0382	Distal Intergenic	446	118614333	118615646	1314	2	ENSG00000226126	ENST00000436509	-46210	NA	NA	NA
5	33260104	33260463	360	*	8.94	9.17	8.68	0.49	7.13e-05	0.0382	Intron (ENST00000661759/ENSG00000251443, intron 3 of 4)	450	33229735	33255553	25819	1	ENSG00000251443	ENST00000503577	30369	105374716	LINC02160	long intergenic non-protein coding RNA 2160
5	458700	459378	679	*	9.31	9.51	9.08	0.43	7.34e-05	0.0389	Promoter (1-2kb)	450	457006	459580	2575	1	ENSG00000180104	ENST00000510028	1694	11336	EXOC3	exocyst complex component 3
9	36029569	36030386	818	*	8.91	9.15	8.63	0.51	7.4e-05	0.0389	Distal Intergenic	454	36036913	36124455	87543	1	ENSG00000122707	ENST00000377966	-6527	8434	RECK	reversion inducing cysteine rich protein with kazal motifs
9	136488633	136488967	335	*	9.25	9.01	9.45	-0.44	7.72e-05	0.0401	Distal Intergenic	454	136440097	136483759	43663	2	ENSG00000148396	ENST00000290037	-4874	9919	SEC16A	SEC16 homolog A, endoplasmic reticulum export factor
5	91957635	91958127	493	*	8.84	9.08	8.56	0.52	7.97e-05	0.0401	Distal Intergenic	450	91843687	91844529	843	2	ENSG00000248826	ENST00000509726	-113106	NA	NA	NA
15	82985617	82986726	1110	*	10.52	10.35	10.67	-0.32	8e-05	0.0401	Promoter (<=1kb)	460	82864213	82986120	121908	2	ENSG00000103942	ENST00000560374	0	9455	HOMER2	homer scaffold protein 2
5	160438420	160439633	1214	*	9.61	9.4	9.79	-0.4	8.04e-05	0.0401	Promoter (<=1kb)	450	160438594	160487426	48833	1	ENSG00000253522	ENST00000642173	0	107075116	MIR3142HG	MIR3142 host gene
5	103423785	103424922	1138	*	9.35	9.55	9.13	0.43	8.09e-05	0.0401	Distal Intergenic	450	103408941	103412511	3571	2	ENSG00000250567	ENST00000507948	-11274	NA	NA	NA
X	107775413	107776669	1257	*	11.18	11.03	11.3	-0.27	8.09e-05	0.0401	Promoter (<=1kb)	468	107713221	107775985	62765	2	ENSG00000157514	ENST00000315660	0	1831	TSC22D3	TSC22 domain family member 3
16	89246995	89247995	1001	*	10.68	10.84	10.5	0.34	8.1e-05	0.0401	Distal Intergenic	461	89226807	89228692	1886	2	ENSG00000260659	ENST00000563182	-18303	NA	NA	NA
15	39657034	39658074	1041	*	10.13	10.29	9.95	0.34	8.28e-05	0.0407	Intron (ENST00000350221/ENSG00000150667, intron 10 of 11)	460	39588357	39618243	29887	2	ENSG00000150667	ENST00000642527	-38791	161835	FSIP1	fibrous sheath interacting protein 1
10	93030417	93030993	577	*	8.17	8.44	7.84	0.6	8.54e-05	0.0416	Intron (ENST00000671701/ENSG00000138190, intron 21 of 22)	455	93059663	93060426	764	2	ENSG00000226425	ENST00000444965	29433	NA	NA	NA
3	10025890	10026936	1047	*	10.49	10.3	10.65	-0.34	8.63e-05	0.0417	Promoter (<=1kb)	448	10026414	10099660	73247	1	ENSG00000144554	ENST00000287647	0	2177	FANCD2	FA complementation group D2
5	23314847	23315260	414	*	8.07	8.36	7.71	0.65	8.8e-05	0.0422	Distal Intergenic	450	23303565	23305143	1579	2	ENSG00000250332	ENST00000511359	-9704	NA	NA	NA
1	208243021	208244821	1801	*	11.01	10.85	11.15	-0.3	9.04e-05	0.0429	Promoter (<=1kb)	446	208022242	208244384	222143	2	ENSG00000076356	ENST00000367033	0	5362	PLXNA2	plexin A2
13	83751931	83752686	756	*	7.65	7.97	7.23	0.75	9.09e-05	0.0429	Distal Intergenic	458	83650249	83654789	4541	2	ENSG00000286446	ENST00000657985	-97142	NA	NA	NA
1	224128192	224128893	702	*	7.71	8.02	7.31	0.7	9.23e-05	0.043	Intron (ENST00000424254/ENSG00000143756, intron 1 of 3)	446	224114218	224131021	16804	1	ENSG00000143756	ENST00000519894	13974	23219	FBXO28	F-box protein 28
5	40446764	40447335	572	*	9.02	9.23	8.77	0.47	9.25e-05	0.043	Distal Intergenic	450	40463562	40504563	41002	1	ENSG00000285552	ENST00000649444	-16227	NA	NA	NA
14	24298921	24300293	1373	*	10.94	10.8	11.08	-0.28	9.82e-05	0.0453	Promoter (<=1kb)	459	24290598	24299780	9183	2	ENSG00000157379	ENST00000288111	0	115817	DHRS1	dehydrogenase/reductase 1
19	18281047	18282579	1533	*	12.26	12.4	12.1	0.3	0.000101	0.046	Promoter (<=1kb)	464	18279694	18281622	1929	2	ENSG00000130522	ENST00000252818	0	3727	JUND	JunD proto-oncogene, AP-1 transcription factor subunit
3	5194520	5195131	612	*	9.09	9.3	8.85	0.44	0.000102	0.046	Promoter (<=1kb)	448	5195106	5201779	6674	1	ENSG00000134109	ENST00000492751	0	9695	EDEM1	ER degradation enhancing alpha-mannosidase like protein 1
1	205485224	205486020	797	*	9.87	9.69	10.04	-0.36	0.000102	0.046	Distal Intergenic	446	205504596	205526835	22240	1	ENSG00000117266	ENST00000512922	-18576	5129	CDK18	cyclin dependent kinase 18
22	46802991	46803868	878	*	8.53	8.21	8.79	-0.58	0.000103	0.0463	Intron (ENST00000380995/ENSG00000054611, intron 5 of 13)	467	46773927	47174092	400166	1	ENSG00000054611	ENST00000406733	29064	25771	TBC1D22A	TBC1 domain family member 22A
8	62247993	62250146	2154	*	11.17	11.02	11.3	-0.28	0.000105	0.0463	Promoter (<=1kb)	453	62248591	62946335	697745	1	ENSG00000185942	ENST00000674732	0	286183	NKAIN3	sodium/potassium transporting ATPase interacting 3
6	100269055	100269752	698	*	9.06	9.27	8.82	0.45	0.000106	0.0463	Distal Intergenic	451	100177209	100178192	984	1	ENSG00000216378	ENST00000404225	91846	NA	NA	NA
20	62796246	62796781	536	*	10.39	10.57	10.18	0.38	0.000106	0.0463	Promoter (<=1kb)	465	62796473	62801729	5257	1	ENSG00000101189	ENST00000370487	0	55257	MRGBP	MRG domain binding protein
19	13117949	13119085	1137	*	10.67	10.82	10.5	0.33	0.000111	0.0481	Promoter (<=1kb)	464	13118264	13141147	22884	1	ENSG00000160877	ENST00000292431	0	112939	NACC1	nucleus accumbens associated 1
10	91908088	91909642	1555	*	11.03	10.88	11.15	-0.27	0.000112	0.0481	Promoter (<=1kb)	455	91906584	91909486	2903	2	ENSG00000174721	ENST00000311575	0	143282	FGFBP3	fibroblast growth factor binding protein 3
10	111677458	111678370	913	*	9.48	9.67	9.26	0.42	0.000115	0.0486	Distal Intergenic	455	111498191	111498941	751	2	ENSG00000230809	ENST00000431996	-178517	NA	NA	NA
1	3491215	3492210	996	*	10.52	10.36	10.66	-0.3	0.000115	0.0486	Promoter (1-2kb)	446	3490312	3493486	3175	2	ENSG00000162591	ENST00000494257	1276	1953	MEGF6	multiple EGF like domains 6
1	162538733	162539466	734	*	9.4	9.6	9.17	0.43	0.000116	0.0486	Promoter (2-3kb)	446	162541332	162541628	297	2	ENSG00000227941	ENST00000447827	2162	NA	NA	NA
12	17928512	17929407	896	*	9.11	9.32	8.86	0.46	0.000116	0.0486	Distal Intergenic	457	18081337	18090141	8805	2	ENSG00000111404	ENST00000536890	160734	79785	RERGL	RERG like
5	25638062	25638778	717	*	9.29	9.5	9.03	0.48	0.000117	0.0487	Distal Intergenic	450	25701217	25701324	108	2	ENSG00000201016	ENST00000364146	62546	NA	NA	NA
5	123098845	123100230	1386	*	10.78	10.63	10.92	-0.29	0.000119	0.049	Promoter (<=1kb)	450	123099745	123180285	80541	1	ENSG00000061455	ENST00000434521	0	93166	PRDM6	PR/SET domain 6
9	133148307	133149939	1633	*	12.09	12.21	11.95	0.26	0.000121	0.0496	Promoter (<=1kb)	454	133097720	133149334	51615	2	ENSG00000160271	ENST00000393160	0	5900	RALGDS	ral guanine nucleotide dissociation stimulator
1	185858411	185858827	417	*	8.07	8.34	7.73	0.61	0.000124	0.0503	Intron (ENST00000271588/ENSG00000143341, intron 2 of 106)	446	185957069	185993437	36369	1	ENSG00000143341	ENST00000485744	-98242	83872	HMCN1	hemicentin 1
2	212451684	212452338	655	*	9.46	9.65	9.24	0.4	0.000124	0.0503	Intron (ENST00000342788/ENSG00000178568, intron 1 of 27)	447	211750699	212429247	678549	2	ENSG00000178568	ENST00000435846	-22437	2066	ERBB4	erb-b2 receptor tyrosine kinase 4
3	16012131	16013004	874	*	8.62	8.85	8.34	0.51	0.000125	0.0503	Distal Intergenic	448	15970003	15971253	1251	1	ENSG00000286689	ENST00000655579	42128	NA	NA	NA
2	216692033	216692996	964	*	9.78	9.57	9.95	-0.38	0.000129	0.0514	Promoter (1-2kb)	447	216694464	216993999	299536	1	ENSG00000236886	ENST00000447289	-1468	NA	NA	NA
19	4583156	4584389	1234	*	9.09	8.85	9.29	-0.44	0.000131	0.0519	Promoter (1-2kb)	464	4542593	4581776	39184	2	ENSG00000167680	ENST00000676793	-1380	10501	SEMA6B	semaphorin 6B
5	87121240	87121709	470	*	8.94	9.15	8.69	0.46	0.000132	0.0521	Promoter (<=1kb)	450	87048957	87122147	73191	2	ENSG00000233828	ENST00000666497	438	NA	NA	NA
3	106030335	106031041	707	*	9.26	9.45	9.03	0.42	0.000133	0.0521	Distal Intergenic	448	106160417	106224375	63959	1	ENSG00000287421	ENST00000667697	-129376	NA	NA	NA
19	43675373	43676014	642	*	9.22	9.42	9	0.42	0.000134	0.0521	Distal Intergenic	464	43648580	43670547	21968	2	ENSG00000011422	ENST00000221264	-4826	5329	PLAUR	plasminogen activator, urokinase receptor
4	109559655	109561313	1659	*	11.31	11.17	11.44	-0.27	0.000141	0.054	Promoter (<=1kb)	449	109560209	109683194	122986	1	ENSG00000005059	ENST00000472310	0	55013	MCUB	mitochondrial calcium uniporter dominant negative beta subunit
15	34275605	34276185	581	*	9.25	9.45	9.03	0.41	0.000141	0.054	Intron (ENST00000354181/ENSG00000140199, intron 2 of 25)	460	34255286	34257832	2547	1	ENSG00000259468	ENST00000559867	20319	NA	NA	NA
4	2755693	2756843	1151	*	11.01	11.16	10.85	0.31	0.000142	0.054	Promoter (<=1kb)	449	2741648	2756331	14684	2	ENSG00000168884	ENST00000510267	0	79155	TNIP2	TNFAIP3 interacting protein 2
12	84793440	84794153	714	*	7.88	8.17	7.51	0.65	0.000142	0.054	Distal Intergenic	457	84861603	84867833	6231	2	ENSG00000072041	ENST00000548267	73680	55117	SLC6A15	solute carrier family 6 member 15
13	37657116	37657628	513	*	8.24	8.51	7.91	0.61	0.000147	0.0555	Intron (ENST00000379705/ENSG00000133107, intron 6 of 10)	458	37663428	37674370	10943	2	ENSG00000133107	ENST00000494529	16742	7223	TRPC4	transient receptor potential cation channel subfamily C member 4
17	82417897	82419118	1222	*	11.3	11.45	11.14	0.32	0.000148	0.0556	Promoter (<=1kb)	462	82418318	82442645	24328	1	ENSG00000169660	ENST00000337014	0	284004	HEXD	hexosaminidase D
7	116476879	116477974	1096	*	9.32	9.51	9.1	0.41	0.000154	0.0574	Intron (ENST00000477018/ENSG00000105971, intron 8 of 10)	452	116416397	116482783	66387	2	ENSG00000237813	ENST00000656866	4809	NA	NA	NA
1	96309496	96310125	630	*	8.45	8.71	8.13	0.58	0.000157	0.0579	Intron (ENST00000435311/ENSG00000231987, intron 3 of 5)	446	96254069	96374125	120057	2	ENSG00000231987	ENST00000435311	64000	101928241	LINC01787	long intergenic non-protein coding RNA 1787
5	123297198	123297794	597	*	7.65	7.96	7.26	0.7	0.00016	0.0579	Distal Intergenic	450	123344895	123352576	7682	2	ENSG00000168944	ENST00000676384	54782	153241	CEP120	centrosomal protein 120
1	36099427	36100346	920	*	10.53	10.37	10.67	-0.3	0.00016	0.0579	Promoter (<=1kb)	446	36095241	36100249	5009	2	ENSG00000171812	ENST00000303143	0	1296	COL8A2	collagen type VIII alpha 2 chain
18	48975319	48976629	1311	*	10.68	10.84	10.51	0.33	0.00016	0.0579	Distal Intergenic	463	48962951	48963941	991	2	ENSG00000266905	ENST00000587659	-11378	NA	NA	NA
7	93326980	93327448	469	*	8.14	8.42	7.8	0.62	0.000161	0.0579	Intron (ENST00000544910/ENSG00000004766, intron 22 of 28)	452	93323250	93348798	25549	1	ENSG00000004766	ENST00000480943	3730	55610	VPS50	VPS50 subunit of EARP/GARPII complex
16	67941932	67942598	667	*	8.56	8.27	8.79	-0.52	0.000163	0.0579	Promoter (<=1kb)	461	67941809	67942577	769	2	ENSG00000213398	ENST00000576450	0	3931	LCAT	lecithin-cholesterol acyltransferase
3	167305286	167305846	561	*	9.08	9.3	8.83	0.47	0.000163	0.0579	3' UTR	448	167240638	167282572	41935	2	ENSG00000169064	ENST00000465071	-22714	79740	ZBBX	zinc finger B-box domain containing
2	15560318	15562034	1717	*	10.41	10.25	10.55	-0.3	0.000163	0.0579	Promoter (<=1kb)	447	15166916	15561334	394419	2	ENSG00000151779	ENST00000281513	0	51594	NBAS	NBAS subunit of NRZ tethering complex
7	93115717	93116306	590	*	9.53	9.71	9.33	0.38	0.000165	0.0582	Promoter (1-2kb)	452	93102249	93117962	15714	2	ENSG00000205413	ENST00000446617	1656	54809	SAMD9	sterile alpha motif domain containing 9
17	78140080	78140941	862	*	11.72	11.85	11.57	0.28	0.000167	0.0582	Promoter (1-2kb)	462	78138363	78141229	2867	1	ENSG00000167895	ENST00000591144	1717	147138	TMC8	transmembrane channel like 8
22	41290593	41291091	499	*	9.25	9.44	9.02	0.42	0.000167	0.0582	Distal Intergenic	467	41244779	41286187	41409	2	ENSG00000100401	ENST00000356244	-4406	5905	RANGAP1	Ran GTPase activating protein 1
16	87560440	87561370	931	*	11.16	11.29	11.02	0.27	0.000168	0.0582	Distal Intergenic	461	87595131	87600337	5207	1	ENSG00000260750	ENST00000660578	-33761	101928737	LOC101928737	uncharacterized LOC101928737
1	43933148	43935153	2006	*	11.22	11.09	11.34	-0.26	0.00017	0.0584	Promoter (<=1kb)	446	43933320	43937239	3920	1	ENSG00000117407	ENST00000414809	0	9048	ARTN	artemin
5	158406750	158407886	1137	*	8.27	8.53	7.95	0.58	0.00017	0.0584	Promoter (1-2kb)	450	158320683	158409773	89091	2	ENSG00000276778	ENST00000619068	1887	101927697	LINC02227	long intergenic non-protein coding RNA 2227
5	19370721	19371414	694	*	8.33	8.58	8.04	0.55	0.000173	0.0589	Distal Intergenic	450	19472951	19478636	5686	2	ENSG00000145526	ENST00000510297	107222	1016	CDH18	cadherin 18
2	176637415	176638524	1110	*	10.04	9.86	10.19	-0.34	0.000174	0.0589	Promoter (<=1kb)	447	176629572	176637931	8360	2	ENSG00000163364	ENST00000295549	0	NA	NA	NA
20	23048315	23050602	2288	*	10.52	10.36	10.67	-0.3	0.000176	0.059	Promoter (<=1kb)	465	23045633	23049672	4040	2	ENSG00000178726	ENST00000377103	0	7056	THBD	thrombomodulin
15	101579652	101580333	682	*	9.09	9.3	8.84	0.46	0.000177	0.059	Promoter (1-2kb)	460	101580893	101581556	664	2	ENSG00000259695	ENST00000560214	1223	NA	NA	NA
7	41148068	41149157	1090	*	9.5	9.69	9.29	0.39	0.000178	0.059	Distal Intergenic	452	41101604	41133507	31904	1	ENSG00000224017	ENST00000440213	46464	101928773	LINC01449	long intergenic non-protein coding RNA 1449
8	122780061	122780958	898	*	10.18	10.01	10.34	-0.33	0.000178	0.059	Promoter (<=1kb)	453	122780760	122781071	312	1	ENSG00000272043	ENST00000607393	0	NA	NA	NA
5	39440239	39440559	321	*	7.98	8.27	7.62	0.65	0.000182	0.0596	Intron (ENST00000511792/ENSG00000153071, intron 1 of 2)	450	39371675	39425233	53559	2	ENSG00000153071	ENST00000545653	-15006	1601	DAB2	DAB adaptor protein 2
4	174794230	174795162	933	*	9.38	9.6	9.13	0.47	0.000184	0.0596	Intron (ENST00000274093/ENSG00000145451, intron 1 of 9)	449	174642487	174829227	186741	2	ENSG00000145451	ENST00000340217	34065	8001	GLRA3	glycine receptor alpha 3
16	66406432	66407287	856	*	10.32	10.15	10.47	-0.31	0.000185	0.0596	Promoter (1-2kb)	461	66408524	66412135	3612	1	ENSG00000246898	ENST00000499966	-1237	NA	NA	NA
16	2235809	2236656	848	*	9.82	9.63	9.98	-0.35	0.000186	0.0596	Promoter (<=1kb)	461	2235816	2238711	2896	1	ENSG00000167968	ENST00000564065	0	1775	DNASE1L2	deoxyribonuclease 1 like 2
2	57181348	57182152	805	*	8.04	8.33	7.68	0.65	0.000188	0.0596	Distal Intergenic	447	57048350	57049336	987	2	ENSG00000271115	ENST00000604970	-132012	NA	NA	NA
16	2673047	2674009	963	*	11.14	11.28	10.97	0.31	0.000188	0.0596	Promoter (<=1kb)	461	2660348	2673395	13048	2	ENSG00000260565	ENST00000564340	0	NA	NA	NA
5	29624533	29625368	836	*	9.42	9.6	9.21	0.39	0.000188	0.0596	Distal Intergenic	450	29600676	29600868	193	1	ENSG00000248418	ENST00000507979	23857	NA	NA	NA
3	111695421	111696233	813	*	9.53	9.71	9.33	0.37	0.000189	0.0596	Intron (ENST00000636933/ENSG00000240891, intron 1 of 3)	448	111691348	111708251	16904	1	ENSG00000240891	ENST00000468174	4073	257068	PLCXD2	phosphatidylinositol specific phospholipase C X domain containing 2
5	134586627	134587464	838	*	9.86	9.67	10.02	-0.34	0.000189	0.0596	Distal Intergenic	450	134576766	134579474	2709	1	ENSG00000043143	ENST00000612830	9861	23338	JADE2	jade family PHD finger 2
16	58197959	58198598	640	*	9.29	9.5	9.04	0.46	0.000191	0.06	Promoter (<=1kb)	461	58157907	58198106	40200	2	ENSG00000070770	ENST00000262506	0	1459	CSNK2A2	casein kinase 2 alpha 2
5	36928599	36929505	907	*	11.05	11.18	10.91	0.27	0.000193	0.0601	Intron (ENST00000282516/ENSG00000164190, intron 1 of 46)	450	36954968	36975897	20930	1	ENSG00000164190	ENST00000505998	-25463	25836	NIPBL	NIPBL cohesin loading factor
19	49017516	49018441	926	*	10.11	9.93	10.27	-0.34	0.000197	0.0607	Promoter (<=1kb)	464	49015980	49017091	1112	2	ENSG00000104826	ENST00000649238	-425	3972	LHB	luteinizing hormone subunit beta
19	10112267	10115076	2810	*	11.4	11.27	11.52	-0.25	0.000197	0.0607	Promoter (<=1kb)	464	10112104	10113834	1731	1	ENSG00000244165	ENST00000471843	163	5032	P2RY11	purinergic receptor P2Y11
9	127942729	127943143	415	*	9.2	8.98	9.4	-0.42	0.000197	0.0607	Promoter (2-3kb)	454	127939736	127940952	1217	1	ENSG00000227218	ENST00000415141	2993	NA	NA	NA
2	10447534	10449305	1772	*	12.16	12.29	12.02	0.27	0.000201	0.0613	Promoter (<=1kb)	447	10439968	10448327	8360	2	ENSG00000115758	ENST00000234111	0	4953	ODC1	ornithine decarboxylase 1
5	150624437	150625132	696	*	9.37	9.57	9.13	0.44	0.000205	0.0624	Promoter (<=1kb)	450	150624715	150648914	24200	1	ENSG00000171992	ENST00000518872	0	11346	SYNPO	synaptopodin
1	190167969	190168537	569	*	7.67	8.01	7.24	0.77	0.000207	0.0624	Intron (ENST00000367462/ENSG00000162670, intron 6 of 7)	446	190216952	190226196	9245	2	ENSG00000162670	ENST00000463404	57659	339479	BRINP3	BMP/retinoic acid inducible neural specific 3
7	117383495	117384127	633	*	8.64	8.87	8.37	0.5	0.000207	0.0624	Intron (ENST00000673785/ENSG00000001626, intron 2 of 12)	452	117332761	117350096	17336	2	ENSG00000286390	ENST00000667297	-33399	NA	NA	NA
2	150142506	150142941	436	*	8.21	8.47	7.89	0.58	0.00021	0.0628	Distal Intergenic	447	150150633	150166266	15634	2	ENSG00000286081	ENST00000652679	23325	105373682	LOC105373682	uncharacterized LOC105373682
5	38853825	38854460	636	*	9.05	9.25	8.82	0.43	0.000211	0.0629	Intron (ENST00000502536/ENSG00000145623, intron 1 of 6)	450	38846012	38935641	89630	1	ENSG00000145623	ENST00000274276	7813	9180	OSMR	oncostatin M receptor
20	10306994	10307591	598	*	8.49	8.72	8.2	0.52	0.000215	0.0637	3' UTR	465	10296230	10307418	11189	1	ENSG00000132639	ENST00000495883	10764	6616	SNAP25	synaptosome associated protein 25
17	60421170	60422118	949	*	10.05	9.88	10.21	-0.33	0.000217	0.0641	Promoter (<=1kb)	462	60421742	60426794	5053	1	ENSG00000141371	ENST00000474834	0	124773	C17orf64	chromosome 17 open reading frame 64
7	1515141	1515576	436	*	8.89	9.1	8.65	0.45	0.000219	0.0643	Distal Intergenic	452	1508655	1509427	773	2	ENSG00000231927	ENST00000416100	-5714	NA	NA	NA
1	96388695	96389404	710	*	8.23	8.49	7.9	0.59	0.000221	0.0646	Promoter (1-2kb)	446	96390652	96391393	742	1	ENSG00000225923	ENST00000439625	-1248	NA	NA	NA
20	58341953	58343008	1056	*	9.9	10.07	9.72	0.35	0.000222	0.0646	Intron (ENST00000244040/ENSG00000124209, intron 2 of 6)	465	58309758	58346048	36291	1	ENSG00000124209	ENST00000488949	32195	57403	RAB22A	RAB22A, member RAS oncogene family
4	182975641	182976205	565	*	8.35	8.59	8.06	0.54	0.000224	0.0648	Distal Intergenic	449	183017426	183036100	18675	1	ENSG00000286821	ENST00000664752	-41221	112268472	LOC112268472	uncharacterized LOC112268472
19	10095868	10096726	859	*	10.56	10.71	10.39	0.32	0.000225	0.0648	Promoter (<=1kb)	464	10092338	10096598	4261	2	ENSG00000130812	ENST00000589181	0	83854	ANGPTL6	angiopoietin like 6
14	99793000	99793963	964	*	9.73	9.91	9.53	0.38	0.000228	0.0653	Promoter (<=1kb)	459	99793343	99941537	148195	1	ENSG00000066629	ENST00000334192	0	2009	EML1	EMAP like 1
8	49121380	49121970	591	*	8.78	9.02	8.49	0.53	0.000231	0.0653	Intron (ENST00000657689/ENSG00000253474, intron 1 of 5)	453	49086301	49228743	142443	1	ENSG00000253474	ENST00000657689	35079	NA	NA	NA
1	79188165	79188774	610	*	8.41	8.65	8.11	0.54	0.000232	0.0653	Promoter (<=1kb)	446	78937962	79188483	250522	2	ENSG00000162618	ENST00000656300	0	64123	ADGRL4	adhesion G protein-coupled receptor L4
2	739966	740993	1028	*	9.13	8.9	9.33	-0.43	0.000233	0.0653	Promoter (<=1kb)	447	739588	740164	577	2	ENSG00000272342	ENST00000606068	0	NA	NA	NA
6	12010787	12012139	1353	*	11.58	11.71	11.43	0.28	0.000233	0.0653	Promoter (<=1kb)	451	12012000	12120222	108223	1	ENSG00000095951	ENST00000487103	0	3096	HIVEP1	HIVEP zinc finger 1
7	4665564	4666472	909	*	10.09	10.24	9.92	0.33	0.000234	0.0653	Distal Intergenic	452	4682295	4771442	89148	1	ENSG00000164916	ENST00000328914	-15823	221937	FOXK1	forkhead box K1
4	169147019	169147674	656	*	7.83	8.11	7.48	0.64	0.000235	0.0653	Intron (ENST00000284637/ENSG00000154447, intron 4 of 11)	449	169116269	169156657	40389	2	ENSG00000154447	ENST00000511421	8983	57630	SH3RF1	SH3 domain containing ring finger 1
9	13267608	13268281	674	*	9.87	10.03	9.69	0.35	0.000235	0.0653	Intron (ENST00000319217/ENSG00000107186, intron 1 of 46)	454	13274510	13279187	4678	2	ENSG00000234740	ENST00000442428	10906	NA	NA	NA
1	196295522	196296271	750	*	9.4	9.59	9.18	0.41	0.00024	0.0661	Intron (ENST00000367433/ENSG00000162687, intron 21 of 26)	446	196340489	196428207	87719	2	ENSG00000162687	ENST00000466914	131936	343450	KCNT2	potassium sodium-activated channel subfamily T member 2
10	132142186	132143094	909	*	8.73	8.46	8.95	-0.48	0.000241	0.0661	Promoter (<=1kb)	455	132142212	132144765	2554	1	ENSG00000188385	ENST00000659220	0	282973	JAKMIP3	Janus kinase and microtubule interacting protein 3
13	83503365	83504004	640	*	7.91	8.18	7.56	0.62	0.000241	0.0661	Distal Intergenic	458	83650249	83654789	4541	2	ENSG00000286446	ENST00000657985	150785	NA	NA	NA
7	73667456	73668186	731	*	10.92	11.05	10.77	0.28	0.000248	0.0675	Promoter (<=1kb)	452	73667831	73672110	4280	1	ENSG00000176428	ENST00000324941	0	155382	VPS37D	VPS37D subunit of ESCRT-I
X	154347108	154348538	1431	*	10.72	10.57	10.86	-0.29	0.000249	0.0675	Promoter (1-2kb)	468	154348922	154350355	1434	2	ENSG00000196924	ENST00000462590	1817	2316	FLNA	filamin A
2	151350367	151351460	1094	*	9.59	9.77	9.39	0.38	0.00025	0.0675	Distal Intergenic	447	151357592	151380046	22455	1	ENSG00000123610	ENST00000243347	-6132	7130	TNFAIP6	TNF alpha induced protein 6
7	7693870	7694475	606	*	9.1	9.3	8.87	0.44	0.000254	0.0679	Intron (ENST00000493246/ENSG00000219545, intron 3 of 3)	452	7636518	7718607	82090	2	ENSG00000106399	ENST00000223129	24132	6119	RPA3	replication protein A3
7	18667464	18668044	581	*	7.88	8.16	7.53	0.63	0.000255	0.0679	3' UTR	452	18793159	18997299	204141	1	ENSG00000048052	ENST00000490851	-125115	9734	HDAC9	histone deacetylase 9
4	95267096	95267670	575	*	8.04	8.33	7.69	0.64	0.000259	0.0679	Intron (ENST00000610318/ENSG00000182168, intron 3 of 14)	449	95162504	95335632	173129	2	ENSG00000182168	ENST00000610318	67962	8633	UNC5C	unc-5 netrin receptor C
X	80765003	80765885	883	*	9.01	9.2	8.77	0.43	0.000259	0.0679	Intron (ENST00000373275/ENSG00000165288, intron 6 of 40)	468	80733158	80734145	988	2	ENSG00000165288	ENST00000487313	-30858	254065	BRWD3	bromodomain and WD repeat domain containing 3
4	99979759	99980335	577	*	7.76	8.07	7.38	0.69	0.000261	0.0679	Intron (ENST00000507494/ENSG00000245322, intron 1 of 4)	449	99990737	99991477	741	2	ENSG00000250403	ENST00000511857	11142	NA	NA	NA
5	30505579	30505933	355	*	7.82	8.12	7.45	0.67	0.000263	0.0679	Distal Intergenic	450	30365405	30365684	280	2	ENSG00000250118	ENST00000502347	-139895	NA	NA	NA
16	1979414	1980165	752	*	10.2	10.02	10.35	-0.33	0.000263	0.0679	Promoter (<=1kb)	461	1978917	1979644	728	2	ENSG00000196408	ENST00000569739	0	124056	NOXO1	NADPH oxidase organizer 1
1	61049695	61051266	1572	*	11.15	11.01	11.28	-0.27	0.000263	0.0679	Promoter (2-3kb)	446	61053830	61332586	278757	1	ENSG00000162599	ENST00000476646	-2564	4774	NFIA	nuclear factor I A
1	89636110	89636689	580	*	9.28	9.47	9.07	0.4	0.000263	0.0679	Promoter (2-3kb)	446	89633181	89708648	75468	1	ENSG00000171488	ENST00000482063	2929	84230	LRRC8C	leucine rich repeat containing 8 VRAC subunit C
16	48384401	48386061	1661	*	11.22	11.35	11.07	0.27	0.000263	0.0679	Promoter (<=1kb)	461	48360531	48385413	24883	2	ENSG00000196470	ENST00000394725	0	6477	SIAH1	siah E3 ubiquitin protein ligase 1
14	60164550	60165792	1243	*	11.11	10.98	11.23	-0.25	0.000264	0.0679	Promoter (<=1kb)	459	60144119	60165398	21280	2	ENSG00000100612	ENST00000557185	0	51635	DHRS7	dehydrogenase/reductase 7
10	48306157	48307511	1355	*	11.37	11.51	11.22	0.29	0.000268	0.0686	Promoter (<=1kb)	455	48306639	48439357	132719	1	ENSG00000107643	ENST00000395611	0	5599	MAPK8	mitogen-activated protein kinase 8
1	234498979	234499616	638	*	9.64	9.44	9.81	-0.36	0.000275	0.0697	Distal Intergenic	446	234391313	234479179	87867	2	ENSG00000059588	ENST00000040877	-19800	6894	TARBP1	TAR (HIV-1) RNA binding protein 1
9	19161559	19162273	715	*	8.57	8.79	8.3	0.5	0.000276	0.0697	Distal Intergenic	454	19129737	19149290	19554	2	ENSG00000147872	ENST00000494753	-12269	123	PLIN2	perilipin 2
7	15130473	15131348	876	*	9.19	9.37	8.97	0.4	0.000277	0.0697	Distal Intergenic	452	15066207	15068651	2445	1	ENSG00000227489	ENST00000445093	64266	NA	NA	NA
9	137458588	137459950	1363	*	11.42	11.56	11.27	0.3	0.000277	0.0697	Promoter (<=1kb)	454	137447570	137459334	11765	2	ENSG00000165802	ENST00000371475	0	26012	NSMF	NMDA receptor synaptonuclear signaling and neuronal migration factor
5	43416091	43416814	724	*	8.23	8.48	7.93	0.55	0.00028	0.0701	Distal Intergenic	450	43379193	43412391	33199	2	ENSG00000151882	ENST00000361115	-3700	56477	CCL28	C-C motif chemokine ligand 28
12	52278669	52279456	788	*	10.54	10.39	10.68	-0.29	0.000288	0.0715	Promoter (<=1kb)	457	52274647	52279156	4510	2	ENSG00000257830	ENST00000549788	0	NA	NA	NA
15	48680850	48681502	653	*	8.62	8.84	8.35	0.49	0.000289	0.0715	Distal Intergenic	460	48662531	48663056	526	2	ENSG00000273925	ENST00000616350	-17794	NA	NA	NA
2	95991412	95993071	1660	*	10.59	10.44	10.73	-0.29	0.000291	0.0715	Promoter (<=1kb)	447	95851166	95991793	140628	2	ENSG00000174501	ENST00000456556	0	400986	ANKRD36C	ankyrin repeat domain 36C
7	158863256	158864504	1249	*	10.57	10.71	10.41	0.3	0.000291	0.0715	Intron (ENST00000407559/ENSG00000126870, intron 1 of 24)	452	158869446	158871499	2054	1	ENSG00000126870	ENST00000397143	-4942	55112	WDR60	WD repeat domain 60
4	15654569	15655885	1317	*	10.89	11.03	10.74	0.29	0.000291	0.0715	Promoter (<=1kb)	449	15604381	15655357	50977	2	ENSG00000118564	ENST00000341285	0	26234	FBXL5	F-box and leucine rich repeat protein 5
2	219252697	219254704	2008	*	12.24	12.12	12.34	-0.23	0.000292	0.0715	Promoter (<=1kb)	447	219249710	219253918	4209	2	ENSG00000127824	ENST00000248437	0	7277	TUBA4A	tubulin alpha 4a
1	151762776	151764224	1449	*	11.16	11.02	11.28	-0.25	0.000296	0.0719	Promoter (<=1kb)	446	151759647	151763496	3850	2	ENSG00000143436	ENST00000368830	0	65005	MRPL9	mitochondrial ribosomal protein L9
5	14051478	14051833	356	*	7.77	8.07	7.39	0.68	0.000297	0.0719	Distal Intergenic	450	14143342	14510204	366863	1	ENSG00000038382	ENST00000344204	-91509	7204	TRIO	trio Rho guanine nucleotide exchange factor
8	143383379	143383906	528	*	9.84	9.67	10	-0.34	0.000297	0.0719	3' UTR	453	143379337	143382779	3443	1	ENSG00000158106	ENST00000522899	4042	114822	RHPN1	rhophilin Rho GTPase binding protein 1
17	69269092	69270107	1016	*	9.82	9.98	9.64	0.35	0.000299	0.0719	Promoter (<=1kb)	462	69248260	69268874	20615	2	ENSG00000154265	ENST00000586811	-218	23461	ABCA5	ATP binding cassette subfamily A member 5
3	49170842	49172052	1211	*	11.47	11.34	11.58	-0.24	0.000303	0.0723	Promoter (<=1kb)	448	49171598	49176486	4889	1	ENSG00000185909	ENST00000332780	0	200942	KLHDC8B	kelch domain containing 8B
3	120170108	120170794	687	*	8.72	8.93	8.46	0.47	0.000303	0.0723	Intron (ENST00000495912/ENSG00000175697, intron 3 of 3)	448	120210320	120210421	102	1	ENSG00000206721	ENST00000383994	-39526	NA	NA	NA
4	127549428	127550250	823	*	8.82	9.03	8.58	0.45	0.000305	0.0725	Intron (ENST00000662020/ENSG00000287021, intron 5 of 5)	449	127498327	127498807	481	1	ENSG00000249795	ENST00000504623	51101	NA	NA	NA
17	21252676	21253755	1080	*	9.86	10.02	9.68	0.34	0.000308	0.073	Promoter (<=1kb)	462	21238870	21253410	14541	2	ENSG00000274180	ENST00000611551	0	256302	NATD1	N-acetyltransferase domain containing 1
17	50272814	50273665	852	*	9.24	8.99	9.46	-0.46	0.00031	0.0731	Promoter (<=1kb)	462	50274466	50281485	7020	1	ENSG00000167105	ENST00000507382	-801	162461	TMEM92	transmembrane protein 92
13	79810539	79811177	639	*	8.69	8.91	8.44	0.47	0.000311	0.0731	Distal Intergenic	458	79804418	79805685	1268	1	ENSG00000229011	ENST00000457858	6121	102724076	LINC01038	long intergenic non-protein coding RNA 1038
9	5621934	5622547	614	*	9.85	10.01	9.67	0.34	0.000313	0.0732	Intron (ENST00000661858/ENSG00000286162, intron 1 of 2)	454	5577021	5628981	51961	2	ENSG00000286162	ENST00000650674	6434	NA	NA	NA
7	65872672	65874196	1525	*	11.63	11.77	11.48	0.29	0.000314	0.0732	Promoter (<=1kb)	452	65873074	65959558	86485	1	ENSG00000196715	ENST00000360768	0	154807	VKORC1L1	vitamin K epoxide reductase complex subunit 1 like 1
10	33365599	33366466	868	*	8.76	8.97	8.5	0.47	0.000318	0.0739	Distal Intergenic	455	33384891	33390935	6045	1	ENSG00000287278	ENST00000654047	-18425	NA	NA	NA
8	19140624	19141777	1154	*	9.84	10	9.67	0.33	0.000322	0.074	Intron (ENST00000660401/ENSG00000254242, intron 2 of 3)	453	19091733	19115251	23519	1	ENSG00000254242	ENST00000518324	48891	105379301	LOC105379301	uncharacterized LOC105379301
17	16282533	16282857	325	*	8.77	8.98	8.52	0.46	0.000323	0.074	Promoter (<=1kb)	462	16282014	16282088	75	1	ENSG00000221355	ENST00000408428	519	100302124	MIR1288	microRNA 1288
6	147507335	147509254	1920	*	10.63	10.48	10.76	-0.28	0.000323	0.074	Promoter (<=1kb)	451	147508690	147570021	61332	1	ENSG00000203727	ENST00000367474	0	389432	SAMD5	sterile alpha motif domain containing 5
1	16383768	16384314	547	*	9.1	9.3	8.88	0.42	0.000323	0.074	Intron (ENST00000475078/ENSG00000055070, intron 2 of 2)	446	16369150	16369530	381	2	ENSG00000226457	ENST00000445689	-14238	NA	NA	NA
19	51777726	51778397	672	*	7.73	7.36	8.02	-0.66	0.000326	0.0741	5' UTR	464	51771311	51773169	1859	2	ENSG00000286236	ENST00000651321	-4557	NA	NA	NA
1	186014390	186015358	969	*	8.56	8.78	8.29	0.49	0.000326	0.0741	Exon (ENST00000271588/ENSG00000143341, exon 31 of 107)	446	185963808	185978145	14338	1	ENSG00000143341	ENST00000493413	50582	83872	HMCN1	hemicentin 1
19	1941628	1942856	1229	*	10.65	10.5	10.79	-0.28	0.000332	0.0745	Promoter (<=1kb)	464	1942459	1978345	35887	1	ENSG00000133275	ENST00000591752	0	1455	CSNK1G2	casein kinase 1 gamma 2
12	52062620	52063784	1165	*	11.07	10.93	11.2	-0.26	0.000332	0.0745	Distal Intergenic	457	52058750	52059503	754	2	ENSG00000259884	ENST00000564363	-3117	115409980	NR4A1AS	NR4A1 antisense RNA
4	142379147	142380114	968	*	9.97	10.12	9.79	0.33	0.000333	0.0745	Intron (ENST00000513000/ENSG00000109452, intron 8 of 26)	449	142237864	142403009	165146	2	ENSG00000109452	ENST00000506297	22895	8821	INPP4B	inositol polyphosphate-4-phosphatase type II B
1	204319367	204320189	823	*	9.5	9.67	9.3	0.37	0.000334	0.0745	Intron (ENST00000272203/ENSG00000143850, intron 1 of 22)	446	204220756	204307395	86640	2	ENSG00000143850	ENST00000637508	-11972	22874	PLEKHA6	pleckstrin homology domain containing A6
5	171954000	171955191	1192	*	9.2	9.39	8.97	0.41	0.000334	0.0745	Intron (ENST00000296933/ENSG00000072803, intron 1 of 12)	450	171910672	171977756	67085	2	ENSG00000072803	ENST00000518752	22565	23291	FBXW11	F-box and WD repeat domain containing 11
15	49415583	49416314	732	*	9.57	9.74	9.38	0.36	0.000337	0.0749	Intron (ENST00000299338/ENSG00000166262, intron 11 of 15)	460	49423237	49425515	2279	1	ENSG00000140285	ENST00000560270	-6923	2252	FGF7	fibroblast growth factor 7
15	74525843	74526449	607	*	9.51	9.68	9.32	0.36	0.000342	0.0754	Distal Intergenic	460	74541206	74598129	56924	1	ENSG00000179361	ENST00000622429	-14757	10620	ARID3B	AT-rich interaction domain 3B
2	234690554	234691549	996	*	10.62	10.47	10.75	-0.27	0.000342	0.0754	Intron (ENST00000629370/ENSG00000280744, intron 1 of 2)	447	234682668	234717764	35097	1	ENSG00000280744	ENST00000629370	7886	106144537	LINC01173	long intergenic non-protein coding RNA 1173
5	35810478	35811630	1153	*	9.21	9.4	8.99	0.41	0.000343	0.0754	Intron (ENST00000356031/ENSG00000152582, intron 36 of 36)	450	35678484	35827018	148535	2	ENSG00000248969	ENST00000510433	15388	NA	NA	NA
1	89842853	89844567	1715	*	11.56	11.43	11.68	-0.25	0.000345	0.0754	Promoter (<=1kb)	446	89843048	89933418	90371	1	ENSG00000171492	ENST00000414841	0	55144	LRRC8D	leucine rich repeat containing 8 VRAC subunit D
12	15628601	15629705	1105	*	10.29	10.43	10.13	0.29	0.000346	0.0754	Promoter (2-3kb)	457	15623220	15631762	8543	2	ENSG00000151491	ENST00000545610	2057	2059	EPS8	epidermal growth factor receptor pathway substrate 8
20	62219782	62220683	902	*	9.96	10.12	9.77	0.35	0.000347	0.0754	Promoter (<=1kb)	465	62214960	62220278	5319	2	ENSG00000101180	ENST00000340177	0	11255	HRH3	histamine receptor H3
5	21672403	21673308	906	*	8.79	9	8.54	0.46	0.000351	0.076	Intron (ENST00000522350/ENSG00000253766, intron 2 of 3)	450	21616262	21779522	163261	1	ENSG00000253766	ENST00000522350	56141	NA	NA	NA
18	57943460	57944342	883	*	9.14	9.33	8.92	0.41	0.000356	0.0767	Distal Intergenic	463	57961231	57963519	2289	2	ENSG00000267209	ENST00000588449	19177	NA	NA	NA
18	5237411	5238936	1526	*	10.81	10.65	10.95	-0.3	0.000361	0.0767	Promoter (<=1kb)	463	5237826	5239859	2034	1	ENSG00000263753	ENST00000581471	0	339290	LINC00667	long intergenic non-protein coding RNA 667
20	44204054	44204745	692	*	9.77	9.94	9.58	0.36	0.000362	0.0767	Intron (ENST00000255174/ENSG00000132823, intron 2 of 3)	465	44196496	44210076	13581	2	ENSG00000132823	ENST00000372970	5331	51526	OSER1	oxidative stress responsive serine rich 1
2	144331751	144333104	1354	*	11.75	11.88	11.61	0.27	0.000363	0.0767	Promoter (<=1kb)	447	143946016	144332534	386519	2	ENSG00000121964	ENST00000542155	0	79712	GTDC1	glycosyltransferase like domain containing 1
1	86703968	86705745	1778	*	12.18	12.06	12.29	-0.24	0.000363	0.0767	Promoter (<=1kb)	446	86704570	86748176	43607	1	ENSG00000097033	ENST00000535010	0	51100	SH3GLB1	SH3 domain containing GRB2 like, endophilin B1
3	87206010	87206622	613	*	9.81	9.97	9.62	0.35	0.000363	0.0767	Distal Intergenic	448	87226189	87226277	89	2	ENSG00000264119	ENST00000584182	19655	100616161	MIR4795	microRNA 4795
12	57632156	57633725	1570	*	10.73	10.59	10.87	-0.28	0.000363	0.0767	Promoter (<=1kb)	457	57623409	57633201	9793	2	ENSG00000135454	ENST00000341156	0	2583	B4GALNT1	beta-1,4-N-acetyl-galactosaminyltransferase 1
17	75113827	75114614	788	*	10.12	9.94	10.28	-0.34	0.000367	0.0772	Promoter (<=1kb)	462	75114291	75129451	15161	1	ENSG00000125449	ENST00000579096	0	79637	ARMC7	armadillo repeat containing 7
3	46516654	46518006	1353	*	9.18	9.37	8.96	0.4	0.000371	0.0777	3' UTR	448	46497976	46500950	2975	1	ENSG00000163825	ENST00000296142	18678	83597	RTP3	receptor transporter protein 3
1	26826118	26827595	1478	*	10.35	10.49	10.19	0.31	0.000381	0.0794	Promoter (<=1kb)	446	26826688	26857604	30917	1	ENSG00000204160	ENST00000374142	0	84243	ZDHHC18	zinc finger DHHC-type containing 18
1	31762463	31763428	966	*	11.01	10.88	11.13	-0.25	0.000381	0.0794	Promoter (<=1kb)	446	31727117	31763922	36806	2	ENSG00000121753	ENST00000398547	494	576	ADGRB2	adhesion G protein-coupled receptor B2
13	73138201	73139538	1338	*	10.38	10.51	10.23	0.29	0.000395	0.0815	Distal Intergenic	458	73112915	73113018	104	2	ENSG00000200267	ENST00000363397	-25183	NA	NA	NA
19	2163585	2164592	1008	*	11.08	11.22	10.92	0.3	0.000396	0.0815	Promoter (<=1kb)	464	2118821	2164468	45648	2	ENSG00000065000	ENST00000643010	0	8943	AP3D1	adaptor related protein complex 3 subunit delta 1
1	32741090	32742020	931	*	10.37	10.51	10.21	0.3	0.000398	0.0815	Promoter (<=1kb)	446	32741830	32774970	33141	1	ENSG00000162522	ENST00000401073	0	57648	KIAA1522	KIAA1522
22	27804675	27805052	378	*	9.21	9	9.4	-0.4	0.000401	0.0815	Promoter (2-3kb)	467	27748277	27801756	53480	2	ENSG00000169184	ENST00000302326	-2919	4330	MN1	MN1 proto-oncogene, transcriptional regulator
5	39774666	39776096	1431	*	10.16	10.33	9.97	0.36	0.000401	0.0815	Distal Intergenic	450	39718984	39721513	2530	2	ENSG00000250492	ENST00000504674	-53153	NA	NA	NA
8	83615087	83616192	1106	*	9.32	9.5	9.12	0.38	0.000401	0.0815	Distal Intergenic	453	83403758	83408900	5143	1	ENSG00000253898	ENST00000522365	211329	103352670	LINC01419	long intergenic non-protein coding RNA 1419
7	155860634	155861868	1235	*	11.24	11.1	11.37	-0.26	0.000404	0.0815	Distal Intergenic	452	155799980	155812463	12484	2	ENSG00000164690	ENST00000297261	-48171	6469	SHH	sonic hedgehog signaling molecule
9	36091079	36092067	989	*	10.36	10.5	10.21	0.29	0.000404	0.0815	Exon (ENST00000377966/ENSG00000122707, exon 10 of 21)	454	36072686	36072762	77	1	ENSG00000276730	ENST00000616606	18393	NA	NA	NA
1	179142812	179143728	917	*	10.59	10.72	10.44	0.27	0.000404	0.0815	Promoter (<=1kb)	446	179104048	179143089	39042	2	ENSG00000143322	ENST00000344730	0	27	ABL2	ABL proto-oncogene 2, non-receptor tyrosine kinase
10	100009239	100010520	1282	*	10.94	11.08	10.77	0.31	0.000405	0.0815	Promoter (<=1kb)	455	99875577	100009947	134371	2	ENSG00000107554	ENST00000324109	0	23268	DNMBP	dynamin binding protein
2	20635653	20636328	676	*	9.22	9.01	9.4	-0.39	0.000416	0.083	Promoter (2-3kb)	447	20622179	20638515	16337	2	ENSG00000118960	ENST00000458740	2187	64342	HS1BP3	HCLS1 binding protein 3
13	51803380	51804489	1110	*	11.22	11.09	11.34	-0.25	0.000418	0.083	Promoter (<=1kb)	458	51767993	51804123	36131	2	ENSG00000102796	ENST00000650833	0	79758	DHRS12	dehydrogenase/reductase 12
7	43535653	43536799	1147	*	10.28	10.42	10.13	0.29	0.000418	0.083	Intron (ENST00000453890/ENSG00000002746, intron 22 of 27)	452	43508728	43522542	13815	2	ENSG00000231638	ENST00000436105	-13111	100506895	LUARIS	lncRNA upregulator of antiviral response interferon signaling
15	55907508	55908335	828	*	10.71	10.84	10.57	0.27	0.000419	0.083	Intron (ENST00000508871/ENSG00000069869, intron 1 of 23)	460	55826922	55915654	88733	2	ENSG00000069869	ENST00000508871	7319	4734	NEDD4	NEDD4 E3 ubiquitin protein ligase
9	136858888	136860024	1137	*	12.32	12.21	12.43	-0.23	0.000419	0.083	Promoter (1-2kb)	454	136857005	136860797	3793	1	ENSG00000177943	ENST00000479475	1883	158056	MAMDC4	MAM domain containing 4
17	10085882	10086567	686	*	8.17	8.43	7.85	0.57	0.000422	0.0831	Intron (ENST00000432992/ENSG00000007237, intron 1 of 13)	462	9946933	10061379	114447	2	ENSG00000007237	ENST00000584389	-24503	8522	GAS7	growth arrest specific 7
15	56598859	56599679	821	*	8.52	8.74	8.26	0.48	0.000427	0.0831	Intron (ENST00000562300/ENSG00000260392, intron 4 of 9)	460	56547938	56629565	81628	2	ENSG00000260392	ENST00000568246	29886	NA	NA	NA
X	118974406	118975737	1332	*	10.3	10.14	10.45	-0.31	0.000428	0.0831	Promoter (<=1kb)	468	118974614	119018355	43742	1	ENSG00000175556	ENST00000304778	0	79836	LONRF3	LON peptidase N-terminal domain and ring finger 3
8	109292357	109292899	543	*	7.83	8.11	7.48	0.63	0.000429	0.0831	Exon (ENST00000678168/ENSG00000120526, exon 4 of 9)	453	109240942	109296731	55790	2	ENSG00000120526	ENST00000679027	3832	84955	NUDCD1	NudC domain containing 1
1	240030990	240031823	834	*	7.96	8.22	7.64	0.58	0.00043	0.0831	Intron (ENST00000447095/ENSG00000155816, intron 1 of 6)	446	240014348	240207187	192840	1	ENSG00000155816	ENST00000447095	16642	56776	FMN2	formin 2
2	195756191	195756967	777	*	7.76	8.04	7.41	0.62	0.000432	0.0831	Promoter (<=1kb)	447	195737997	195756198	18202	2	ENSG00000118997	ENST00000438565	0	56171	DNAH7	dynein axonemal heavy chain 7
1	1290817	1292202	1386	*	11.59	11.47	11.69	-0.23	0.000435	0.0831	Promoter (2-3kb)	446	1294499	1295008	510	2	ENSG00000131584	ENST00000470659	2806	116983	ACAP3	ArfGAP with coiled-coil, ankyrin repeat and PH domains 3
1	34865660	34866899	1240	*	10.57	10.42	10.7	-0.28	0.000435	0.0831	3' UTR	446	34855169	34859755	4587	2	ENSG00000163866	ENST00000456842	-5905	113444	SMIM12	small integral membrane protein 12
19	15449653	15450303	651	*	9.16	9.35	8.93	0.41	0.000436	0.0831	Promoter (<=1kb)	464	15419978	15449951	29974	2	ENSG00000011451	ENST00000263381	0	58525	WIZ	WIZ zinc finger
20	63309330	63310004	675	*	9.3	9.08	9.49	-0.41	0.000437	0.0831	Exon (ENST00000358894/ENSG00000101203, exon 9 of 36)	465	63319086	63328498	9413	1	ENSG00000101203	ENST00000415763	-9082	57642	COL20A1	collagen type XX alpha 1 chain
5	178895517	178896609	1093	*	10.84	10.7	10.96	-0.26	0.000438	0.0831	Promoter (<=1kb)	450	178895898	178931382	35485	1	ENSG00000198939	ENST00000520660	0	80108	ZFP2	ZFP2 zinc finger protein
1	181142340	181142833	494	*	8.87	8.63	9.07	-0.44	0.000441	0.0831	Distal Intergenic	446	181174484	181182208	7725	1	ENSG00000237292	ENST00000435023	-31651	101928973	LINC01732	long intergenic non-protein coding RNA 1732
13	95588168	95589353	1186	*	8.99	9.19	8.77	0.42	0.000442	0.0831	Promoter (<=1kb)	458	95581970	95588133	6164	2	ENSG00000134874	ENST00000485031	-35	22873	DZIP1	DAZ interacting zinc finger protein 1
10	60644468	60645033	566	*	8.28	8.53	7.97	0.57	0.000442	0.0831	Intron (ENST00000373827/ENSG00000151150, intron 1 of 43)	455	60684505	60685209	705	1	ENSG00000122872	ENST00000503220	-39472	NA	NA	NA
5	139648071	139649716	1646	*	11.62	11.5	11.73	-0.23	0.000444	0.0831	Promoter (<=1kb)	450	139648349	139683882	35534	1	ENSG00000171604	ENST00000302517	0	51523	CXXC5	CXXC finger protein 5
5	135190999	135191959	961	*	10.64	10.49	10.77	-0.28	0.000445	0.0831	Intron (ENST00000624272/ENSG00000224186, intron 3 of 5)	450	135247046	135247815	770	2	ENSG00000249647	ENST00000555344	55856	340073	C5orf66-AS2	C5orf66 antisense RNA 2
7	11831445	11832445	1001	*	9.99	9.83	10.14	-0.31	0.000445	0.0831	Promoter (<=1kb)	452	11370365	11832198	461834	2	ENSG00000005108	ENST00000423059	0	221981	THSD7A	thrombospondin type 1 domain containing 7A
13	27270404	27271490	1087	*	10.63	10.48	10.76	-0.29	0.000445	0.0831	Promoter (<=1kb)	458	27270830	27275192	4363	1	ENSG00000122035	ENST00000241463	0	387496	RASL11A	RAS like family 11 member A
17	32265458	32266229	772	*	9.12	9.34	8.87	0.47	0.000448	0.0831	Promoter (<=1kb)	462	32265832	32324659	58828	1	ENSG00000141314	ENST00000269051	0	162494	RHBDL3	rhomboid like 3
15	83287536	83288068	533	*	9.5	9.67	9.31	0.36	0.000448	0.0831	Promoter (2-3kb)	460	83255903	83284714	28812	2	ENSG00000169594	ENST00000345382	-2822	646	BNC1	basonuclin 1
2	83055140	83056017	878	*	9.81	9.96	9.63	0.33	0.000451	0.0834	Distal Intergenic	447	83218890	83219105	216	2	ENSG00000223977	ENST00000418060	163088	NA	NA	NA
15	84840651	84841394	744	*	8.63	8.85	8.37	0.48	0.000455	0.0837	Exon (ENST00000258888/ENSG00000136383, exon 5 of 14)	460	84852498	84852615	118	2	ENSG00000200991	ENST00000364121	11221	NA	NA	NA
3	148902925	148903529	605	*	9.03	9.22	8.8	0.42	0.000456	0.0837	Intron (ENST00000488190/ENSG00000240521, intron 2 of 4)	448	148922703	148956088	33386	1	ENSG00000287198	ENST00000666418	-19174	NA	NA	NA
22	50185629	50186066	438	*	10.42	10.59	10.24	0.35	0.000457	0.0837	Promoter (<=1kb)	467	50185913	50199595	13683	1	ENSG00000170638	ENST00000380909	0	80305	TRABD	TraB domain containing
4	133452588	133453097	510	*	7.92	8.19	7.6	0.59	0.00046	0.0841	Distal Intergenic	449	133574566	133575208	643	2	ENSG00000250191	ENST00000503089	122111	NA	NA	NA
5	174311603	174312465	863	*	8.92	8.69	9.11	-0.43	0.000464	0.0844	Distal Intergenic	450	174329612	174330503	892	1	ENSG00000249722	ENST00000503317	-17147	NA	NA	NA
14	50447370	50448271	902	*	8.77	9	8.51	0.49	0.000465	0.0844	Promoter (<=1kb)	459	50448807	50456742	7936	1	ENSG00000259113	ENST00000555257	-536	NA	NA	NA
15	71707616	71708686	1071	*	10.52	10.36	10.65	-0.29	0.000474	0.0858	Intron (ENST00000355327/ENSG00000187720, intron 8 of 17)	460	71660530	71733932	73403	1	ENSG00000187720	ENST00000567776	47086	79875	THSD4	thrombospondin type 1 domain containing 4
9	129027564	129028700	1137	*	11.81	11.94	11.67	0.27	0.000478	0.0864	Promoter (<=1kb)	454	129007036	129028331	21296	2	ENSG00000148341	ENST00000372564	0	56904	SH3GLB2	SH3 domain containing GRB2 like, endophilin B2
2	163266620	163267323	704	*	9.01	9.21	8.79	0.41	0.00048	0.0864	Distal Intergenic	447	163288995	163289096	102	1	ENSG00000200902	ENST00000364032	-21672	NA	NA	NA
3	36166429	36166891	463	*	8	8.26	7.68	0.57	0.000481	0.0864	Downstream (2-3kb)	448	36169767	36170448	682	2	ENSG00000236158	ENST00000454568	3557	NA	NA	NA
7	79282839	79283737	899	*	9.98	10.13	9.82	0.31	0.00049	0.0871	Intron (ENST00000354212/ENSG00000187391, intron 1 of 21)	452	79343266	79343372	107	2	ENSG00000212482	ENST00000391180	59635	NA	NA	NA
2	66433933	66435490	1558	*	11.39	11.27	11.5	-0.23	0.000492	0.0871	Promoter (<=1kb)	447	66435125	66573869	138745	1	ENSG00000143995	ENST00000272369	0	4211	MEIS1	Meis homeobox 1
2	46298429	46300084	1656	*	10.79	10.65	10.91	-0.26	0.000492	0.0871	Promoter (<=1kb)	447	46297764	46347537	49774	1	ENSG00000116016	ENST00000467888	665	2034	EPAS1	endothelial PAS domain protein 1
1	148279996	148281059	1064	*	10.3	10.15	10.44	-0.29	0.000493	0.0871	Promoter (<=1kb)	446	148271884	148280749	8866	2	ENSG00000234283	ENST00000428035	0	NA	NA	NA
5	172282858	172284784	1927	*	12.01	12.13	11.87	0.26	0.000494	0.0871	Promoter (<=1kb)	450	172209646	172283764	74119	2	ENSG00000168246	ENST00000393792	0	92181	UBTD2	ubiquitin domain containing 2
4	153222161	153223609	1449	*	10.85	10.72	10.98	-0.26	0.000494	0.0871	Promoter (<=1kb)	449	153222307	153326725	104419	1	ENSG00000109654	ENST00000675871	0	23321	TRIM2	tripartite motif containing 2
5	90296966	90297655	690	*	8.41	8.13	8.64	-0.51	0.000497	0.0872	Distal Intergenic	450	90234896	90290078	55183	2	ENSG00000248555	ENST00000664570	-6888	101929495	LINC01339	long intergenic non-protein coding RNA 1339
X	36431749	36432219	471	*	8.48	8.71	8.21	0.5	0.000499	0.0872	Intron (ENST00000455438/ENSG00000226484, intron 2 of 7)	468	36365626	36440292	74667	2	ENSG00000226484	ENST00000455438	8073	101928627	LOC101928627	uncharacterized LOC101928627
5	39517751	39518283	533	*	10.92	11.04	10.79	0.26	0.000499	0.0872	Promoter (2-3kb)	450	39520398	39524726	4329	1	ENSG00000271334	ENST00000603514	-2115	101926940	LINC02104	long intergenic non-protein coding RNA 2104
15	84747437	84749761	2325	*	12.39	12.5	12.27	0.23	0.000506	0.0881	Promoter (<=1kb)	460	84748592	84806445	57854	1	ENSG00000166716	ENST00000560079	0	9640	ZNF592	zinc finger protein 592
18	28728969	28729683	715	*	7.71	7.99	7.36	0.63	0.00051	0.0885	Intron (ENST00000649159/ENSG00000265994, intron 2 of 2)	463	28785068	28789260	4193	1	ENSG00000265994	ENST00000582726	-55385	NA	NA	NA
17	59093347	59094265	919	*	10.89	11.02	10.74	0.28	0.000516	0.0892	Intron (ENST00000393066/ENSG00000108395, intron 2 of 24)	462	59061089	59081162	20074	2	ENSG00000108395	ENST00000581468	-12185	4591	TRIM37	tripartite motif containing 37
20	57391072	57392024	953	*	10	10.16	9.83	0.33	0.000516	0.0892	Promoter (<=1kb)	465	57391396	57409333	17938	1	ENSG00000132819	ENST00000356208	0	55544	RBM38	RNA binding motif protein 38
17	62679871	62681243	1373	*	10.51	10.36	10.65	-0.29	0.000518	0.0893	Promoter (<=1kb)	462	62680631	62693553	12923	1	ENSG00000011028	ENST00000583597	0	9902	MRC2	mannose receptor C type 2
4	118888498	118889272	775	*	9.85	9.68	10	-0.33	0.000524	0.09	Promoter (<=1kb)	449	118888841	119061245	172405	1	ENSG00000172403	ENST00000448416	0	171024	SYNPO2	synaptopodin 2
5	692505	693982	1478	*	11.54	11.67	11.41	0.26	0.000527	0.0903	Promoter (<=1kb)	450	659862	693352	33491	2	ENSG00000171368	ENST00000360578	0	11076	TPPP	tubulin polymerization promoting protein
1	167517395	167517977	583	*	8.11	8.36	7.81	0.55	0.000532	0.0905	Promoter (<=1kb)	446	167430640	167518529	87890	2	ENSG00000198821	ENST00000362089	552	919	CD247	CD247 molecule
1	9688968	9690176	1209	*	10.71	10.86	10.55	0.31	0.000534	0.0905	Promoter (<=1kb)	446	9688176	9691946	3771	1	ENSG00000171608	ENST00000484851	792	5293	PIK3CD	phosphatidylinositol-4,5-bisphosphate 3-kinase catalytic subunit delta
9	36738413	36738939	527	*	7.78	8.07	7.42	0.66	0.000535	0.0905	Distal Intergenic	454	36764896	36777081	12186	1	ENSG00000288571	ENST00000657370	-25957	NA	NA	NA
2	204544821	204546272	1452	*	11.36	11.24	11.48	-0.24	0.000535	0.0905	Promoter (<=1kb)	447	204545475	205620162	1074688	1	ENSG00000116117	ENST00000406610	0	117583	PARD3B	par-3 family cell polarity regulator beta
5	32686849	32687813	965	*	9.75	9.92	9.57	0.35	0.000537	0.0905	Promoter (1-2kb)	450	32689070	32783028	93959	1	ENSG00000113389	ENST00000509104	-1257	4883	NPR3	natriuretic peptide receptor 3
2	148391200	148391933	734	*	8.34	8.58	8.06	0.53	0.000538	0.0905	Intron (ENST00000488372/ENSG00000204406, intron 3 of 3)	447	148447567	148460277	12711	1	ENSG00000204406	ENST00000637159	-55634	55777	MBD5	methyl-CpG binding domain protein 5
7	131896938	131897613	676	*	9.65	9.8	9.47	0.34	0.000539	0.0905	Promoter (<=1kb)	452	131897289	131898212	924	1	ENSG00000224865	ENST00000656736	0	101928782	LOC101928782	uncharacterized LOC101928782
1	245156120	245157005	886	*	10.22	10.05	10.38	-0.33	0.000544	0.0911	Promoter (1-2kb)	446	245154985	245709432	554448	1	ENSG00000162849	ENST00000407071	1135	55083	KIF26B	kinesin family member 26B
16	89201428	89201951	524	*	7.73	8.05	7.32	0.73	0.000546	0.0911	Promoter (<=1kb)	461	89195761	89201651	5891	2	ENSG00000259803	ENST00000562855	0	146429	SLC22A31	solute carrier family 22 member 31
3	36773896	36774648	753	*	9.18	9.36	8.97	0.39	0.000547	0.0911	Intron (ENST00000424886/ENSG00000230067, intron 1 of 1)	448	36767117	36768799	1683	2	ENSG00000230067	ENST00000388967	-5097	NA	NA	NA
2	241558520	241560084	1565	*	11.04	10.9	11.16	-0.26	0.000551	0.0912	Promoter (<=1kb)	447	241558745	241574131	15387	1	ENSG00000176720	ENST00000318407	0	666	BOK	BCL2 family apoptosis regulator BOK
13	73187861	73188433	573	*	8.05	8.3	7.75	0.55	0.000552	0.0912	Distal Intergenic	458	73191528	73191667	140	1	ENSG00000201253	ENST00000364383	-3095	NA	NA	NA
2	187359975	187360830	856	*	9.37	9.54	9.17	0.36	0.000553	0.0912	Exon (ENST00000392370/ENSG00000064989, exon 10 of 15)	447	187415552	187415818	267	1	ENSG00000231739	ENST00000435908	-54722	NA	NA	NA
4	86556805	86557890	1086	*	10.42	10.55	10.28	0.27	0.000554	0.0912	Intron (ENST00000641051/ENSG00000109339, intron 1 of 14)	449	86542482	86542552	71	2	ENSG00000266515	ENST00000583004	-14253	100616463	MIR4452	microRNA 4452
4	1792800	1794270	1471	*	10.33	10.48	10.16	0.33	0.000555	0.0912	Promoter (<=1kb)	449	1793293	1808867	15575	1	ENSG00000068078	ENST00000440486	0	2261	FGFR3	fibroblast growth factor receptor 3
X	48867748	48868354	607	*	9.1	9.29	8.89	0.39	0.000562	0.092	Distal Intergenic	468	48890197	48903105	12909	1	ENSG00000102103	ENST00000651767	-21843	10084	PQBP1	polyglutamine binding protein 1
19	3573712	3574334	623	*	10.23	10.4	10.05	0.35	0.000563	0.092	Promoter (<=1kb)	464	3574293	3575964	1672	1	ENSG00000064961	ENST00000486028	0	10362	HMG20B	high mobility group 20B
2	142596427	142597167	741	*	8.1	8.37	7.76	0.61	0.000566	0.0921	Distal Intergenic	447	142543418	142543975	558	1	ENSG00000228134	ENST00000415815	53009	NA	NA	NA
1	9909344	9911273	1930	*	12.49	12.61	12.36	0.26	0.000571	0.0924	Promoter (<=1kb)	446	9848276	9910269	61994	2	ENSG00000178585	ENST00000377263	0	56998	CTNNBIP1	catenin beta interacting protein 1
5	27315491	27316693	1203	*	10.77	10.89	10.63	0.27	0.000573	0.0924	Intron (ENST00000650981/ENSG00000250337, intron 2 of 9)	450	27217714	27496404	278691	1	ENSG00000250337	ENST00000651409	97777	643401	PURPL	p53 upregulated regulator of p53 levels
8	125602512	125602946	435	*	8.3	8.55	8	0.55	0.000573	0.0924	Distal Intergenic	453	125648327	125955592	307266	1	ENSG00000286122	ENST00000651999	-45381	NA	NA	NA
12	46998885	46999476	592	*	8.01	8.26	7.69	0.57	0.000573	0.0924	Distal Intergenic	457	46970504	46972155	1652	1	ENSG00000274723	ENST00000621214	28381	NA	NA	NA
10	43105173	43105989	817	*	9.5	9.31	9.66	-0.35	0.000586	0.0941	Promoter (<=1kb)	455	43104732	43106490	1759	1	ENSG00000165731	ENST00000479913	441	5979	RET	ret proto-oncogene
17	66542866	66543939	1074	*	9.55	9.71	9.37	0.34	0.000587	0.0941	Intron (ENST00000413366/ENSG00000154229, intron 3 of 16)	462	66638271	66638374	104	1	ENSG00000252685	ENST00000516876	-94332	NA	NA	NA
1	241482507	241483879	1373	*	10.26	10.39	10.11	0.28	0.000591	0.0944	Promoter (1-2kb)	446	241453751	241484995	31245	2	ENSG00000287738	ENST00000662663	1116	NA	NA	NA
19	44723705	44726011	2307	*	11.36	11.24	11.47	-0.23	0.000593	0.0944	Promoter (<=1kb)	464	44631573	44725217	93645	2	ENSG00000266903	ENST00000662585	0	NA	NA	NA
2	211132464	211133188	725	*	9.03	9.22	8.81	0.41	0.000596	0.0944	Distal Intergenic	447	211104934	211105732	799	1	ENSG00000271074	ENST00000605674	27530	NA	NA	NA
18	74745765	74746440	676	*	8.85	9.05	8.62	0.43	0.000597	0.0944	Intron (ENST00000582337/ENSG00000215421, intron 3 of 4)	463	74631020	75065669	434650	1	ENSG00000215421	ENST00000299687	114745	55628	ZNF407	zinc finger protein 407
4	48329963	48330336	374	*	8.18	8.43	7.89	0.55	0.000602	0.0944	Distal Intergenic	449	48341529	48426201	84673	1	ENSG00000109171	ENST00000264313	-11193	57606	SLAIN2	SLAIN motif family member 2
7	80481186	80481807	622	*	9.59	9.75	9.4	0.35	0.000604	0.0944	Intron (ENST00000435819/ENSG00000135218, intron 1 of 16)	452	80458635	80512064	53430	2	ENSG00000214415	ENST00000398291	30257	346562	GNAT3	G protein subunit alpha transducin 3
19	38851854	38852412	559	*	10.29	10.45	10.11	0.33	0.000605	0.0944	Promoter (<=1kb)	464	38836395	38852347	15953	2	ENSG00000104824	ENST00000388749	0	3191	HNRNPL	heterogeneous nuclear ribonucleoprotein L
14	103056369	103058386	2018	*	11.89	12.02	11.75	0.27	0.000605	0.0944	Promoter (<=1kb)	459	102932380	103057549	125170	2	ENSG00000198752	ENST00000361246	0	9578	CDC42BPB	CDC42 binding protein kinase beta
9	22103044	22104397	1354	*	11.71	11.82	11.6	0.22	0.000606	0.0944	Intron (ENST00000585267/ENSG00000240498, intron 4 of 8)	454	22112071	22120709	8639	1	ENSG00000240498	ENST00000645223	-7674	100048912	CDKN2B-AS1	CDKN2B antisense RNA 1
10	112136929	112137800	872	*	9.66	9.47	9.82	-0.35	0.000607	0.0944	Distal Intergenic	455	112153870	112183710	29841	2	ENSG00000119927	ENST00000369425	45910	57678	GPAM	glycerol-3-phosphate acyltransferase, mitochondrial
15	87354644	87355577	934	*	9.56	9.74	9.37	0.37	0.000608	0.0944	Intron (ENST00000665121/ENSG00000259560, intron 4 of 4)	460	87474183	87474289	107	2	ENSG00000207150	ENST00000384421	118712	NA	NA	NA
1	156246832	156248413	1582	*	10.51	10.36	10.65	-0.3	0.000609	0.0944	Promoter (<=1kb)	446	156243320	156248056	4737	2	ENSG00000160781	ENST00000292291	0	79957	PAQR6	progestin and adipoQ receptor family member 6
3	126474603	126476214	1612	*	11.3	11.42	11.15	0.27	0.000609	0.0944	Promoter (<=1kb)	448	126437601	126475891	38291	2	ENSG00000070476	ENST00000389709	0	79364	ZXDC	ZXD family zinc finger C
4	90495779	90496951	1173	*	8.35	8.61	8.05	0.56	0.000611	0.0944	Intron (ENST00000505073/ENSG00000184305, intron 5 of 9)	449	90370123	90370427	305	1	ENSG00000252087	ENST00000516278	125656	NA	NA	NA
17	75091018	75091724	707	*	10.65	10.52	10.78	-0.26	0.000614	0.0946	Promoter (<=1kb)	462	75090162	75100182	10021	1	ENSG00000170190	ENST00000584207	856	9121	SLC16A5	solute carrier family 16 member 5
2	102664375	102664846	472	*	8.8	9	8.57	0.43	0.000619	0.0949	Intron (ENST00000233969/ENSG00000115616, intron 2 of 11)	447	102684298	102686768	2471	1	ENSG00000115616	ENST00000467657	-19452	6549	SLC9A2	solute carrier family 9 member A2
1	182893157	182893809	653	*	8.07	8.33	7.76	0.56	0.000621	0.0949	Distal Intergenic	446	182881285	182887747	6463	1	ENSG00000135829	ENST00000473076	11872	1660	DHX9	DExH-box helicase 9
4	83358352	83358806	455	*	8.72	8.93	8.48	0.44	0.000622	0.0949	Distal Intergenic	449	83369416	83369523	108	2	ENSG00000274154	ENST00000615297	10717	NA	NA	NA
13	88217160	88218405	1246	*	10.53	10.67	10.38	0.3	0.000622	0.0949	Intron (ENST00000430214/ENSG00000231019, intron 3 of 4)	458	88236547	88236969	423	2	ENSG00000225289	ENST00000448725	18564	NA	NA	NA
5	36689974	36690938	965	*	11.22	11.09	11.34	-0.25	0.000627	0.0954	Intron (ENST00000510740/ENSG00000250155, intron 1 of 2)	450	36680347	36686233	5887	1	ENSG00000079215	ENST00000506178	9627	6507	SLC1A3	solute carrier family 1 member 3
19	1315481	1316205	725	*	9.64	9.46	9.8	-0.34	0.000633	0.0957	Distal Intergenic	464	1321225	1322846	1622	1	ENSG00000267372	ENST00000590086	-5020	NA	NA	NA
6	169723269	169725052	1784	*	10.63	10.78	10.47	0.32	0.000634	0.0957	Promoter (<=1kb)	451	169703902	169724500	20599	2	ENSG00000130024	ENST00000339209	0	55274	PHF10	PHD finger protein 10
5	134289371	134290056	686	*	8.42	8.16	8.65	-0.49	0.000635	0.0957	Intron (ENST00000520515/ENSG00000273345, intron 9 of 9)	450	134298432	134304422	5991	2	ENSG00000006837	ENST00000518990	14366	51265	CDKL3	cyclin dependent kinase like 3
12	78703918	78704797	880	*	8.9	9.12	8.65	0.47	0.000636	0.0957	Distal Intergenic	457	78793526	78794114	589	2	ENSG00000257564	ENST00000546724	89317	NA	NA	NA
12	122980149	122981586	1438	*	10.83	10.69	10.95	-0.26	0.000639	0.0957	Promoter (<=1kb)	457	122980179	122982908	2730	1	ENSG00000182196	ENST00000539770	0	51329	ARL6IP4	ADP ribosylation factor like GTPase 6 interacting protein 4
4	153676919	153677703	785	*	10.45	10.59	10.29	0.31	0.000639	0.0957	Promoter (<=1kb)	449	153678259	153680550	2292	1	ENSG00000250771	ENST00000507055	-556	100419170	LOC100419170	toll like receptor 2 pseudogene
X	24266877	24267689	813	*	8.13	8.37	7.83	0.54	0.00064	0.0957	Distal Intergenic	468	24310862	24314079	3218	2	ENSG00000223611	ENST00000486479	46390	NA	NA	NA
10	79195085	79195788	704	*	9.58	9.39	9.74	-0.35	0.000646	0.0963	Intron (ENST00000334512/ENSG00000108175, intron 4 of 24)	455	79201595	79315753	114159	1	ENSG00000108175	ENST00000611351	-5807	57178	ZMIZ1	zinc finger MIZ-type containing 1
14	33685818	33686828	1011	*	10.59	10.72	10.45	0.26	0.000651	0.0969	Promoter (2-3kb)	459	33677360	33682886	5527	2	ENSG00000287777	ENST00000657073	-2932	NA	NA	NA
19	912538	913398	861	*	9.38	9.56	9.17	0.39	0.000653	0.0969	Promoter (<=1kb)	464	896503	913219	16717	2	ENSG00000198858	ENST00000361574	0	91300	R3HDM4	R3H domain containing 4
19	45001132	45002509	1378	*	11.43	11.57	11.28	0.29	0.000654	0.0969	Promoter (<=1kb)	464	45001449	45038198	36750	1	ENSG00000104856	ENST00000625761	0	5971	RELB	RELB proto-oncogene, NF-kB subunit
15	31870382	31871072	691	*	8.54	8.77	8.25	0.52	0.00066	0.097	Promoter (<=1kb)	460	31475398	31870673	395276	2	ENSG00000169918	ENST00000307050	0	161725	OTUD7A	OTU deubiquitinase 7A
13	64278435	64278970	536	*	7.85	8.12	7.53	0.59	0.000663	0.097	Distal Intergenic	458	63851197	64076044	224848	2	ENSG00000227674	ENST00000650541	-202391	144766	LINC00355	long intergenic non-protein coding RNA 355
2	189933784	189934417	634	*	9.5	9.66	9.32	0.35	0.000664	0.097	Promoter (2-3kb)	447	189930277	189931010	734	2	ENSG00000213110	ENST00000392337	-2774	NA	NA	NA
2	191333833	191334479	647	*	7.87	8.13	7.55	0.58	0.000665	0.097	Intron (ENST00000418908/ENSG00000128641, intron 4 of 5)	447	191369564	191387284	17721	1	ENSG00000128641	ENST00000634375	-35085	4430	MYO1B	myosin IB
7	151110825	151111435	611	*	9.38	9.19	9.55	-0.36	0.000666	0.097	Promoter (<=1kb)	452	151112184	151118333	6150	1	ENSG00000133612	ENST00000492234	-749	116988	AGAP3	ArfGAP with GTPase domain, ankyrin repeat and PH domain 3
10	58856322	58857252	931	*	10.08	10.24	9.91	0.33	0.000667	0.097	Distal Intergenic	455	58869184	58869528	345	1	ENSG00000252076	ENST00000516267	-11932	NA	NA	NA
6	113103687	113104769	1083	*	9.2	9.4	8.96	0.44	0.000668	0.097	Distal Intergenic	451	113129707	113140870	11164	1	ENSG00000287728	ENST00000670412	-24938	NA	NA	NA
5	13372273	13372806	534	*	7.93	8.2	7.6	0.6	0.000669	0.097	Distal Intergenic	450	13250235	13250662	428	2	ENSG00000242608	ENST00000495419	-121611	NA	NA	NA
17	79114079	79115461	1383	*	11.59	11.48	11.7	-0.22	0.00067	0.097	Promoter (<=1kb)	462	79089367	79115580	26214	2	ENSG00000167281	ENST00000648001	119	146713	RBFOX3	RNA binding fox-1 homolog 3
2	164840594	164842369	1776	*	11.63	11.51	11.73	-0.23	0.000674	0.097	Promoter (<=1kb)	447	164680186	164842168	161983	2	ENSG00000082438	ENST00000392717	0	22837	COBLL1	cordon-bleu WH2 repeat protein like 1
18	46173311	46175021	1711	*	11.48	11.36	11.59	-0.23	0.000676	0.097	Promoter (<=1kb)	463	46173553	46216318	42766	1	ENSG00000152242	ENST00000587591	0	147339	C18orf25	chromosome 18 open reading frame 25
7	133707768	133708325	558	*	7.8	8.07	7.46	0.61	0.000676	0.097	Intron (ENST00000253861/ENSG00000131558, intron 10 of 17)	452	133727368	133727734	367	2	ENSG00000235967	ENST00000454627	19409	NA	NA	NA
9	21688234	21689086	853	*	9.6	9.76	9.42	0.33	0.000676	0.097	Distal Intergenic	454	21695176	21696943	1768	1	ENSG00000229835	ENST00000427983	-6090	NA	NA	NA
9	14170598	14171534	937	*	8.52	8.73	8.26	0.47	0.000683	0.0977	Intron (ENST00000543693/ENSG00000147862, intron 2 of 10)	454	14088304	14180792	92489	2	ENSG00000147862	ENST00000380924	9258	4781	NFIB	nuclear factor I B
6	78598635	78599873	1239	*	10.17	10.3	10.01	0.29	0.00069	0.0984	Distal Intergenic	451	78604467	78606036	1570	2	ENSG00000230309	ENST00000449463	6163	NA	NA	NA
3	77726110	77726950	841	*	8.72	8.92	8.48	0.45	0.000691	0.0984	Distal Intergenic	448	77811741	77811844	104	2	ENSG00000206891	ENST00000384164	84894	NA	NA	NA
5	53362438	53363115	678	*	10.18	10.32	10.03	0.29	0.000697	0.0989	Distal Intergenic	450	53297872	53326565	28694	2	ENSG00000285831	ENST00000648942	-35873	NA	NA	NA
17	75240180	75241055	876	*	9.25	9.05	9.43	-0.38	0.000698	0.0989	Promoter (<=1kb)	462	75236600	75240450	3851	2	ENSG00000125447	ENST00000614198	0	23163	GGA3	golgi associated, gamma adaptin ear containing, ARF binding protein 3
15	39641220	39642641	1422	*	10.83	10.95	10.7	0.26	0.000701	0.0991	Intron (ENST00000350221/ENSG00000150667, intron 10 of 11)	460	39588357	39618243	29887	2	ENSG00000150667	ENST00000642527	-22977	161835	FSIP1	fibrous sheath interacting protein 1
21	41879094	41879949	856	*	9.39	9.58	9.18	0.41	0.000704	0.0991	Promoter (<=1kb)	466	41798225	41879344	81120	2	ENSG00000141956	ENST00000398548	0	63977	PRDM15	PR/SET domain 15
6	75195957	75196939	983	*	8.81	9	8.58	0.43	0.000706	0.0991	Intron (ENST00000615798/ENSG00000111799, intron 2 of 66)	451	75086547	75202792	116246	2	ENSG00000111799	ENST00000416123	5853	1303	COL12A1	collagen type XII alpha 1 chain
1	16073481	16073888	408	*	9.47	9.63	9.29	0.35	0.000706	0.0991	Promoter (<=1kb)	446	16057769	16073651	15883	2	ENSG00000185519	ENST00000375662	0	348487	FAM131C	family with sequence similarity 131 member C
15	49135392	49136375	984	*	8.91	9.1	8.69	0.41	0.000709	0.0993	Promoter (1-2kb)	460	49134135	49137459	3325	2	ENSG00000166200	ENST00000559016	1084	9318	COPS2	COP9 signalosome subunit 2
2	69741202	69742632	1431	*	11.53	11.42	11.64	-0.22	0.000716	0.0996	Promoter (<=1kb)	447	69741974	69825781	83808	1	ENSG00000196975	ENST00000409920	0	307	ANXA4	annexin A4
12	47095582	47096286	705	*	9.59	9.75	9.4	0.35	0.000717	0.0996	Intron (ENST00000432328/ENSG00000179715, intron 1 of 2)	457	47076447	47079959	3513	2	ENSG00000139211	ENST00000550413	-15623	347902	AMIGO2	adhesion molecule with Ig like domain 2
3	27721314	27722715	1402	*	11.43	11.31	11.54	-0.23	0.00072	0.0996	Promoter (<=1kb)	448	27715949	27722498	6550	2	ENSG00000163508	ENST00000295743	0	8320	EOMES	eomesodermin
8	78804258	78805681	1424	*	10.73	10.6	10.85	-0.25	0.00072	0.0996	Promoter (<=1kb)	453	78732772	78805463	72692	2	ENSG00000104432	ENST00000263851	0	3574	IL7	interleukin 7
1	27601724	27602457	734	*	10.2	10.04	10.34	-0.3	0.00072	0.0996	Promoter (<=1kb)	446	27552496	27603414	50919	2	ENSG00000126705	ENST00000490295	957	27245	AHDC1	AT-hook DNA binding motif containing 1
10	96043143	96044736	1594	*	11.36	11.24	11.46	-0.22	0.000721	0.0996	Promoter (<=1kb)	455	96043394	96059588	16195	1	ENSG00000107443	ENST00000403870	0	54619	CCNJ	cyclin J
2	161913689	161914222	534	*	7.75	8.02	7.41	0.61	0.000725	0.0997	Intron (ENST00000375514/ENSG00000144290, intron 15 of 26)	447	161931199	161931466	268	2	ENSG00000234732	ENST00000441137	17244	NA	NA	NA
9	37200567	37201096	530	*	8.67	8.87	8.43	0.44	0.000725	0.0997	Intron (ENST00000336755/ENSG00000147905, intron 2 of 8)	454	37205112	37205368	257	2	ENSG00000228292	ENST00000404812	4272	NA	NA	NA
20	62595591	62595912	322	*	8.35	8.59	8.06	0.52	0.000727	0.0998	Downstream (<1kb)	465	62596732	62603115	6384	2	ENSG00000273812	ENST00000617730	7203	NA	NA	NA
15	39624688	39625291	604	*	8.49	8.71	8.23	0.48	0.000731	0.0999	Intron (ENST00000350221/ENSG00000150667, intron 10 of 11)	460	39588357	39618243	29887	2	ENSG00000150667	ENST00000642527	-6445	161835	FSIP1	fibrous sheath interacting protein 1
8	144315849	144316523	675	*	10.44	10.3	10.57	-0.27	0.000733	0.0999	Promoter (<=1kb)	453	144314590	144315138	549	2	ENSG00000254690	ENST00000525023	-711	NA	NA	NA
12	51951053	51952622	1570	*	10.39	10.53	10.24	0.28	0.000735	0.0999	Promoter (<=1kb)	457	51951699	51997078	45380	1	ENSG00000135503	ENST00000257963	0	91	ACVR1B	activin A receptor type 1B
1	69947839	69948488	650	*	7.98	8.23	7.67	0.56	0.000735	0.0999	Intron (ENST00000651989/ENSG00000033122, intron 8 of 26)	446	69919357	69919657	301	1	ENSG00000229359	ENST00000439639	28482	5301	PIN1P1	peptidylprolyl cis/trans isomerase, NIMA-interacting 1 pseudogene 1
19	17946350	17946624	275	*	8.16	7.87	8.41	-0.54	0.00074	0.1	Distal Intergenic	464	17951293	18000080	48788	1	ENSG00000105642	ENST00000222249	-4669	3780	KCNN1	potassium calcium-activated channel subfamily N member 1
4	21802011	21802965	955	*	8.66	8.86	8.42	0.44	0.000742	0.1	Intron (ENST00000382152/ENSG00000185774, intron 1 of 8)	449	21843341	21853188	9848	2	ENSG00000280650	ENST00000627566	50223	359822	KCNIP4-IT1	KCNIP4 intronic transcript 1
1	10693679	10695343	1665	*	10.35	10.5	10.19	0.31	0.000744	0.1	Promoter (<=1kb)	446	10652984	10694479	41496	2	ENSG00000130940	ENST00000496432	0	54897	CASZ1	castor zinc finger 1
10	23438538	23440852	2315	*	11.88	12	11.76	0.24	0.000747	0.101	Promoter (<=1kb)	455	23439458	23442390	2933	1	ENSG00000165312	ENST00000376495	0	220213	OTUD1	OTU deubiquitinase 1
22	45717788	45718160	373	*	8.05	8.29	7.75	0.54	0.000751	0.101	Promoter (<=1kb)	467	45718423	45740800	22378	1	ENSG00000130638	ENST00000483549	-263	25814	ATXN10	ataxin 10
4	140252261	140253578	1318	*	10.34	10.18	10.48	-0.3	0.000764	0.102	Distal Intergenic	449	140257286	140382556	125271	1	ENSG00000153130	ENST00000394205	-3708	60592	SCOC	short coiled-coil protein
6	81751472	81754211	2740	*	12.33	12.22	12.43	-0.21	0.000767	0.102	Promoter (<=1kb)	451	81491439	81751812	260374	2	ENSG00000112773	ENST00000412306	0	55603	TENT5A	terminal nucleotidyltransferase 5A
12	104049356	104050449	1094	*	10.37	10.23	10.51	-0.28	0.000768	0.102	Promoter (<=1kb)	457	103988984	104050137	61154	2	ENSG00000120820	ENST00000360814	0	83468	GLT8D2	glycosyltransferase 8 domain containing 2
1	211736354	211736798	445	*	8.91	8.68	9.11	-0.43	0.000769	0.102	Distal Intergenic	446	211715928	211725402	9475	2	ENSG00000226868	ENST00000458662	-10952	NA	NA	NA
20	64038233	64039504	1272	*	11.76	11.63	11.87	-0.24	0.000769	0.102	Promoter (<=1kb)	465	64038140	64039778	1639	1	ENSG00000196421	ENST00000358393	93	284739	C20orf204	chromosome 20 open reading frame 204
5	25090394	25091434	1041	*	9.94	10.08	9.78	0.3	0.000773	0.102	Intron (ENST00000641970/ENSG00000251273, intron 5 of 5)	450	25187800	25193543	5744	1	ENSG00000245662	ENST00000642022	-96366	NA	NA	NA
1	188778480	188779159	680	*	7.69	7.98	7.32	0.67	0.000774	0.102	Distal Intergenic	446	188705623	188732208	26586	2	ENSG00000237283	ENST00000432976	-46272	NA	NA	NA
10	84328119	84329571	1453	*	11.35	11.49	11.2	0.29	0.000774	0.102	Promoter (<=1kb)	455	84328586	84374005	45420	1	ENSG00000107771	ENST00000359979	0	54462	CCSER2	coiled-coil serine rich protein 2
3	194685640	194686511	872	*	10.85	10.72	10.97	-0.25	0.00078	0.103	Promoter (<=1kb)	448	194685883	194689037	3155	1	ENSG00000185112	ENST00000329759	0	131583	FAM43A	family with sequence similarity 43 member A
10	74055944	74056861	918	*	8.98	9.17	8.76	0.41	0.000793	0.104	Intron (ENST00000623461/ENSG00000035403, intron 4 of 22)	455	74043091	74063890	20800	1	ENSG00000035403	ENST00000461383	12853	7414	VCL	vinculin
6	70398594	70399647	1054	*	9.38	9.55	9.19	0.36	0.000794	0.104	Exon (ENST00000671572/ENSG00000237643, exon 3 of 3)	451	70394895	70403117	8223	1	ENSG00000237643	ENST00000667898	3699	NA	NA	NA
10	4725832	4726504	673	*	9.52	9.68	9.33	0.34	0.000798	0.104	Distal Intergenic	455	4659203	4678185	18983	2	ENSG00000231298	ENST00000665967	-47647	100216001	MANCR	mitotically associated long non coding RNA
5	134140474	134141247	774	*	10.02	9.86	10.16	-0.3	0.000799	0.104	Promoter (<=1kb)	450	134140535	134148236	7702	1	ENSG00000081059	ENST00000524342	0	6932	TCF7	transcription factor 7
4	13988171	13989851	1681	*	11.46	11.33	11.57	-0.24	0.000803	0.104	Promoter (<=1kb)	449	13988759	14003756	14998	1	ENSG00000250634	ENST00000658596	0	101929071	LINC01182	long intergenic non-protein coding RNA 1182
5	27814768	27815482	715	*	10.29	10.42	10.14	0.28	0.000804	0.104	Distal Intergenic	450	27493359	27496404	3046	1	ENSG00000250337	ENST00000671061	321409	643401	PURPL	p53 upregulated regulator of p53 levels
6	157800455	157801104	650	*	7.77	8.04	7.45	0.59	0.000804	0.104	Intron (ENST00000614703/ENSG00000130340, intron 3 of 5)	451	157823246	157945077	121832	1	ENSG00000130340	ENST00000392185	-22142	51429	SNX9	sorting nexin 9
4	162647724	162648525	802	*	9.18	9.38	8.95	0.43	0.000804	0.104	Distal Intergenic	449	162705359	162746678	41320	1	ENSG00000248431	ENST00000655347	-56834	NA	NA	NA
4	91830560	91831290	731	*	8.9	8.66	9.1	-0.43	0.000806	0.104	Distal Intergenic	449	91885046	91885254	209	2	ENSG00000249891	ENST00000510983	53964	NA	NA	NA
2	196987560	196988434	875	*	9.69	9.85	9.52	0.33	0.00081	0.104	3' UTR	447	196992678	196993638	961	2	ENSG00000065413	ENST00000486006	5204	91526	ANKRD44	ankyrin repeat domain 44
5	24773074	24773820	747	*	9.9	10.04	9.73	0.31	0.000813	0.105	Exon (ENST00000651142/ENSG00000286238, exon 3 of 3)	450	24786842	24787024	183	2	ENSG00000248156	ENST00000510421	13204	NA	NA	NA
X	154534666	154535435	770	*	9.67	9.49	9.82	-0.33	0.000829	0.106	Promoter (<=1kb)	468	154533317	154534193	877	2	ENSG00000160211	ENST00000489497	-473	2539	G6PD	glucose-6-phosphate dehydrogenase
16	2816786	2818509	1724	*	11.37	11.25	11.48	-0.23	0.000829	0.106	Promoter (<=1kb)	461	2817180	2821719	4540	1	ENSG00000007038	ENST00000450020	0	10942	PRSS21	serine protease 21
3	83902374	83903512	1139	*	9.72	9.88	9.54	0.34	0.000839	0.107	Distal Intergenic	448	83924157	83937031	12875	2	ENSG00000286567	ENST00000655435	33519	NA	NA	NA
7	110157469	110158192	724	*	8.43	8.67	8.14	0.54	0.000846	0.108	Intron (ENST00000667232/ENSG00000226965, intron 6 of 7)	452	110215891	110216380	490	1	ENSG00000278424	ENST00000612027	-57699	NA	NA	NA
14	34274638	34275736	1099	*	9.35	9.52	9.16	0.35	0.000848	0.108	Intron (ENST00000551935/ENSG00000129521, intron 1 of 4)	459	34096163	34227814	131652	2	ENSG00000129521	ENST00000546681	-46824	112399	EGLN3	egl-9 family hypoxia inducible factor 3
9	101485897	101487579	1683	*	11.65	11.53	11.76	-0.22	0.000849	0.108	Promoter (<=1kb)	454	101473170	101487173	14004	2	ENSG00000165152	ENST00000374848	0	84302	PGAP4	post-GPI attachment to proteins GalNAc transferase 4
X	57909390	57910830	1441	*	9.84	9.68	9.99	-0.31	0.00085	0.108	Promoter (<=1kb)	468	57906708	57910820	4113	2	ENSG00000198205	ENST00000358697	0	7789	ZXDA	zinc finger X-linked duplicated A
6	124226345	124227116	772	*	9.49	9.65	9.31	0.35	0.000854	0.108	Intron (ENST00000368417/ENSG00000188580, intron 1 of 6)	451	124283004	124283271	268	1	ENSG00000188580	ENST00000546092	-55888	154215	NKAIN2	sodium/potassium transporting ATPase interacting 2
13	20127367	20128838	1472	*	10.52	10.38	10.65	-0.27	0.000856	0.108	Distal Intergenic	458	20102701	20103230	530	1	ENSG00000236076	ENST00000455848	24666	104355137	LINC01072	long intergenic non-protein coding RNA 1072
3	45199687	45200746	1060	*	10.53	10.65	10.4	0.26	0.000859	0.108	Distal Intergenic	448	45224466	45226287	1822	2	ENSG00000249992	ENST00000503771	25541	25907	TMEM158	transmembrane protein 158 (gene/pseudogene)
5	40333307	40334100	794	*	9.6	9.76	9.43	0.33	0.000862	0.108	Distal Intergenic	450	40306824	40312905	6082	2	ENSG00000287597	ENST00000665809	-20402	105374736	LOC105374736	uncharacterized LOC105374736
2	75199330	75201007	1678	*	10.55	10.41	10.68	-0.27	0.000864	0.108	Promoter (<=1kb)	447	75046463	75199520	153058	2	ENSG00000115353	ENST00000305249	0	6869	TACR1	tachykinin receptor 1
9	131738857	131740436	1580	*	10.87	11	10.74	0.26	0.000865	0.108	Promoter (<=1kb)	454	131576770	131740074	163305	2	ENSG00000107263	ENST00000372195	0	2889	RAPGEF1	Rap guanine nucleotide exchange factor 1
3	41198771	41200429	1659	*	11.61	11.5	11.71	-0.21	0.000869	0.108	Promoter (<=1kb)	448	41199389	41240443	41055	1	ENSG00000168036	ENST00000396185	0	1499	CTNNB1	catenin beta 1
5	26872285	26872751	467	*	7.88	8.15	7.54	0.61	0.00087	0.108	Distal Intergenic	450	26880686	26890833	10148	2	ENSG00000113100	ENST00000505020	18082	1007	CDH9	cadherin 9
18	80108672	80110097	1426	*	11.32	11.44	11.18	0.27	0.000873	0.108	Promoter (<=1kb)	463	80109262	80140346	31085	1	ENSG00000101544	ENST00000262198	0	22850	ADNP2	ADNP homeobox 2
20	34349395	34349956	562	*	8.23	8.46	7.95	0.51	0.000873	0.108	Promoter (1-2kb)	465	34347671	34347785	115	2	ENSG00000234087	ENST00000437424	-1610	NA	NA	NA
9	129665185	129666211	1027	*	9.7	9.86	9.52	0.34	0.000879	0.108	Promoter (<=1kb)	454	129665647	129722674	57028	1	ENSG00000167157	ENST00000372469	0	51450	PRRX2	paired related homeobox 2
5	140556907	140557954	1048	*	11.1	10.97	11.21	-0.24	0.000882	0.108	Promoter (<=1kb)	450	140550068	140557456	7389	2	ENSG00000213523	ENST00000602775	0	10011	SRA1	steroid receptor RNA activator 1
7	113764359	113764965	607	*	8.02	8.27	7.72	0.55	0.000884	0.108	Distal Intergenic	452	113879771	113918996	39226	2	ENSG00000154415	ENST00000284602	154031	5506	PPP1R3A	protein phosphatase 1 regulatory subunit 3A
13	62642780	62643537	758	*	10.22	10.37	10.04	0.33	0.000886	0.108	Distal Intergenic	458	62539351	62574905	35555	2	ENSG00000286469	ENST00000671601	-67875	NA	NA	NA
1	10779032	10779628	597	*	9.14	9.32	8.93	0.39	0.000887	0.108	Intron (ENST00000377022/ENSG00000130940, intron 1 of 20)	446	10636604	10796646	160043	2	ENSG00000130940	ENST00000377022	17018	54897	CASZ1	castor zinc finger 1
12	96774356	96775298	943	*	8.9	9.09	8.67	0.43	0.000889	0.108	Intron (ENST00000524981/ENSG00000188596, intron 60 of 67)	457	96647975	96765270	117296	1	ENSG00000188596	ENST00000342887	126381	144535	CFAP54	cilia and flagella associated protein 54
19	43668072	43669478	1407	*	12.53	12.65	12.4	0.25	0.000892	0.108	Promoter (<=1kb)	464	43652226	43668320	16095	2	ENSG00000011422	ENST00000599892	0	5329	PLAUR	plasminogen activator, urokinase receptor
5	135245419	135246601	1183	*	11.31	11.19	11.42	-0.23	0.000893	0.108	Promoter (1-2kb)	450	135247046	135247815	770	2	ENSG00000249647	ENST00000555344	1214	340073	C5orf66-AS2	C5orf66 antisense RNA 2
7	100691596	100692131	536	*	8.99	8.77	9.18	-0.41	0.000895	0.108	Promoter (1-2kb)	452	100679507	100693968	14462	2	ENSG00000146830	ENST00000646601	1837	64599	GIGYF1	GRB10 interacting GYF protein 1
8	140796853	140797805	953	*	9.95	10.09	9.79	0.31	0.000896	0.108	Promoter (1-2kb)	453	140744697	140799297	54601	2	ENSG00000169398	ENST00000523746	1492	5747	PTK2	protein tyrosine kinase 2
5	23317842	23318579	738	*	8.91	9.1	8.69	0.41	0.000898	0.108	Distal Intergenic	450	23329427	23329892	466	2	ENSG00000249289	ENST00000507087	11313	NA	NA	NA
20	45061109	45061879	771	*	9.03	9.22	8.81	0.41	0.000899	0.108	Intron (ENST00000499879/ENSG00000101109, intron 9 of 9)	465	45092310	45101112	8803	2	ENSG00000124134	ENST00000306117	39233	3787	KCNS1	potassium voltage-gated channel modifier subfamily S member 1
3	9809213	9810732	1520	*	11.75	11.64	11.85	-0.21	0.000902	0.108	Promoter (<=1kb)	448	9809700	9817656	7957	1	ENSG00000214021	ENST00000419081	0	26140	TTLL3	tubulin tyrosine ligase like 3
4	105894945	105896635	1691	*	11.07	10.94	11.19	-0.25	0.000902	0.108	Promoter (<=1kb)	449	105699873	105895986	196114	2	ENSG00000138785	ENST00000510876	0	57117	INTS12	integrator complex subunit 12
14	96104412	96105312	901	*	10.35	10.21	10.48	-0.27	0.000903	0.108	Distal Intergenic	459	96039384	96086809	47426	1	ENSG00000227051	ENST00000553782	65028	56967	C14orf132	chromosome 14 open reading frame 132
2	145751583	145752798	1216	*	10.7	10.57	10.82	-0.25	0.000903	0.108	Intron (ENST00000651680/ENSG00000286225, intron 1 of 1)	447	145826285	145827830	1546	2	ENSG00000234119	ENST00000427568	75032	NA	NA	NA
15	40282014	40283218	1205	*	10.92	10.79	11.04	-0.25	0.000905	0.109	Promoter (<=1kb)	460	40281444	40282586	1143	2	ENSG00000230778	ENST00000434396	0	100131244	ANKRD63	ankyrin repeat domain 63
9	137302149	137302917	769	*	10.56	10.7	10.42	0.28	0.000913	0.109	Promoter (<=1kb)	454	137299631	137302271	2641	2	ENSG00000198435	ENST00000356628	0	441478	NRARP	NOTCH regulated ankyrin repeat protein
1	224113805	224115090	1286	*	10.63	10.49	10.76	-0.27	0.000919	0.11	Promoter (<=1kb)	446	224114111	224158150	44040	1	ENSG00000143756	ENST00000424254	0	23219	FBXO28	F-box protein 28
15	78715888	78716364	477	*	8.52	8.73	8.27	0.46	0.000922	0.11	Intron (ENST00000565476/ENSG00000261303, intron 2 of 4)	460	78631062	78720286	89225	2	ENSG00000117971	ENST00000560511	3922	1143	CHRNB4	cholinergic receptor nicotinic beta 4 subunit
1	23637369	23638303	935	*	9.67	9.49	9.83	-0.33	0.000923	0.11	Intron (ENST00000477916/ENSG00000197880, intron 5 of 6)	446	23627334	23640568	13235	1	ENSG00000197880	ENST00000374555	10035	259283	MDS2	myelodysplastic syndrome 2 translocation associated
3	24688582	24689162	581	*	8.13	8.37	7.84	0.54	0.000926	0.11	Promoter (<=1kb)	448	24687919	25174305	486387	1	ENSG00000237838	ENST00000455576	663	NA	NA	NA
8	96493416	96495537	2122	*	11.81	11.7	11.91	-0.21	0.000929	0.11	Promoter (<=1kb)	453	96493813	96537343	43531	1	ENSG00000169439	ENST00000520233	0	6383	SDC2	syndecan 2
8	118896859	118897783	925	*	8.75	8.95	8.53	0.42	0.000931	0.11	Intron (ENST00000625758/ENSG00000281641, intron 6 of 7)	453	118924475	118929073	4599	2	ENSG00000164761	ENST00000521597	31290	4982	TNFRSF11B	TNF receptor superfamily member 11b
7	74417275	74418246	972	*	10.16	10.01	10.29	-0.29	0.000933	0.11	Distal Intergenic	452	74400482	74404326	3845	1	ENSG00000106665	ENST00000487447	16793	7461	CLIP2	CAP-Gly domain containing linker protein 2
12	52879291	52880315	1025	*	11.2	11.08	11.3	-0.23	0.000938	0.11	Distal Intergenic	457	52885429	52886385	957	1	ENSG00000241146	ENST00000485823	-5114	NA	NA	NA
5	30272430	30273135	706	*	8.71	8.93	8.46	0.47	0.000953	0.112	Distal Intergenic	450	30248350	30248893	544	1	ENSG00000250587	ENST00000505250	24080	NA	NA	NA
22	50251930	50252691	762	*	10.38	10.24	10.5	-0.27	0.00096	0.113	Promoter (<=1kb)	467	50250119	50251405	1287	2	ENSG00000100429	ENST00000497483	-525	83933	HDAC10	histone deacetylase 10
15	91561329	91562338	1010	*	8.43	8.64	8.17	0.47	0.000961	0.113	Intron (ENST00000555947/ENSG00000258551, intron 2 of 2)	460	91532891	91535095	2205	1	ENSG00000258954	ENST00000553410	28438	NA	NA	NA
6	154509338	154511201	1864	*	11.43	11.31	11.54	-0.23	0.000969	0.113	Promoter (<=1kb)	451	154387515	154510685	123171	2	ENSG00000153721	ENST00000607772	0	154043	CNKSR3	CNKSR family member 3
2	85701487	85701939	453	*	8.41	8.63	8.15	0.47	0.000969	0.113	Distal Intergenic	447	85695368	85698747	3380	1	ENSG00000115523	ENST00000526018	6119	10578	GNLY	granulysin
3	65955912	65956520	609	*	7.94	8.21	7.62	0.58	0.000975	0.113	Promoter (1-2kb)	448	65872815	65954558	81744	2	ENSG00000272610	ENST00000460754	-1354	151877	MAGI1-IT1	MAGI1 intronic transcript 1
1	218344869	218346374	1506	*	11.62	11.51	11.73	-0.21	0.000979	0.114	Promoter (<=1kb)	446	218345336	218444619	99284	1	ENSG00000092969	ENST00000366930	0	7042	TGFB2	transforming growth factor beta 2
14	63044896	63046338	1443	*	11.1	10.97	11.21	-0.23	0.000981	0.114	Promoter (<=1kb)	459	62699464	63045458	345995	2	ENSG00000140015	ENST00000322893	0	27133	KCNH5	potassium voltage-gated channel subfamily H member 5
7	100569390	100570432	1043	*	9.59	9.42	9.75	-0.33	0.000984	0.114	Promoter (<=1kb)	452	100570131	100571136	1006	1	ENSG00000184414	ENST00000223076	0	NA	NA	NA
10	101062167	101063119	953	*	10.89	10.75	11.01	-0.27	0.000989	0.114	Promoter (<=1kb)	455	101063078	101067890	4813	1	ENSG00000107821	ENST00000477267	0	81621	KAZALD1	Kazal type serine peptidase inhibitor domain 1
3	96813066	96814695	1630	*	11.37	11.26	11.48	-0.22	0.000992	0.114	Promoter (<=1kb)	448	96814581	97244696	430116	1	ENSG00000080224	ENST00000470610	0	285220	EPHA6	EPH receptor A6
1	155176639	155176976	338	*	9.23	9.03	9.4	-0.37	0.000993	0.114	Promoter (1-2kb)	446	155174754	155184971	10218	1	ENSG00000163462	ENST00000611379	1885	80128	TRIM46	tripartite motif containing 46
15	34628499	34629250	752	*	9.37	9.53	9.18	0.35	0.000996	0.114	Distal Intergenic	460	34657736	34670512	12777	1	ENSG00000287973	ENST00000654640	-28486	NA	NA	NA
7	129438976	129439349	374	*	8.06	8.3	7.77	0.54	0.000998	0.114	Intron (ENST00000249344/ENSG00000128578, intron 1 of 20)	452	129434446	129483631	49186	1	ENSG00000128578	ENST00000435494	4530	57464	STRIP2	striatin interacting protein 2
X	130192059	130192815	757	*	7.91	7.59	8.16	-0.57	0.00101	0.115	Distal Intergenic	468	130171962	130184870	12909	1	ENSG00000134594	ENST00000257017	20097	9363	RAB33A	RAB33A, member RAS oncogene family
7	27046849	27047518	670	*	7.65	7.93	7.31	0.62	0.00101	0.115	Promoter (<=1kb)	452	27048169	27048628	460	1	ENSG00000213786	ENST00000396362	-651	NA	NA	NA
13	104385314	104386102	789	*	10.31	10.16	10.45	-0.29	0.00101	0.115	Distal Intergenic	458	104125930	104134257	8328	1	ENSG00000287734	ENST00000670156	259384	105370340	LOC105370340	uncharacterized LOC105370340
3	50237776	50239068	1293	*	11.56	11.45	11.67	-0.22	0.00102	0.116	Promoter (<=1kb)	448	50238112	50258751	20640	1	ENSG00000114353	ENST00000440628	0	2771	GNAI2	G protein subunit alpha i2
19	45693288	45693675	388	*	8.71	8.46	8.92	-0.46	0.00102	0.116	Promoter (<=1kb)	464	45692758	45698825	6068	1	ENSG00000011478	ENST00000591606	530	54814	QPCTL	glutaminyl-peptide cyclotransferase like
5	41647246	41647554	309	*	8.75	8.95	8.51	0.44	0.00103	0.116	Distal Intergenic	450	41585882	41587787	1906	2	ENSG00000251478	ENST00000504215	-59459	NA	NA	NA
10	122112262	122114313	2052	*	11.95	11.84	12.05	-0.21	0.00103	0.116	Promoter (<=1kb)	455	122113030	122210569	97540	1	ENSG00000138162	ENST00000493951	0	10579	TACC2	transforming acidic coiled-coil containing protein 2
5	32642393	32643096	704	*	9.33	9.49	9.14	0.35	0.00103	0.116	Distal Intergenic	450	32646564	32651976	5413	2	ENSG00000250885	ENST00000514225	8880	NA	NA	NA
3	17039255	17040253	999	*	10.97	11.09	10.85	0.24	0.00103	0.116	Intron (ENST00000615277/ENSG00000154822, intron 3 of 5)	448	17042742	17044192	1451	2	ENSG00000226441	ENST00000414844	3939	NA	NA	NA
20	40286670	40287700	1031	*	11.43	11.31	11.53	-0.23	0.00103	0.116	Distal Intergenic	465	40121041	40126357	5317	1	ENSG00000223410	ENST00000445278	165629	NA	NA	NA
1	174788866	174790024	1159	*	8.82	9.02	8.58	0.44	0.00104	0.117	Intron (ENST00000251507/ENSG00000152061, intron 18 of 20)	446	174799932	174995308	195377	1	ENSG00000152061	ENST00000489615	-9908	9910	RABGAP1L	RAB GTPase activating protein 1 like
1	211724499	211725476	978	*	10.28	10.14	10.41	-0.28	0.00105	0.118	Promoter (<=1kb)	446	211715928	211725402	9475	2	ENSG00000226868	ENST00000458662	0	NA	NA	NA
14	33938055	33938969	915	*	10.25	10.38	10.1	0.28	0.00105	0.118	Intron (ENST00000250457/ENSG00000129521, intron 1 of 4)	459	33925511	33931336	5826	2	ENSG00000129521	ENST00000556785	-6719	112399	EGLN3	egl-9 family hypoxia inducible factor 3
5	53470012	53470993	982	*	8.5	8.72	8.25	0.46	0.00105	0.118	Distal Intergenic	450	53480626	53487106	6481	1	ENSG00000134363	ENST00000396947	-9633	10468	FST	follistatin
1	65002278	65003412	1135	*	10.89	10.75	11.01	-0.26	0.00106	0.118	Promoter (<=1kb)	446	64974611	65002454	27844	2	ENSG00000226891	ENST00000654678	0	101927084	LINC01359	long intergenic non-protein coding RNA 1359
5	76402573	76404493	1921	*	11.22	11.09	11.33	-0.24	0.00106	0.118	Promoter (<=1kb)	450	76403285	76708132	304848	1	ENSG00000145703	ENST00000274364	0	10788	IQGAP2	IQ motif containing GTPase activating protein 2
1	31550941	31551692	752	*	9.74	9.9	9.57	0.33	0.00107	0.118	Exon (ENST00000640226/ENSG00000284543, exon 3 of 4)	446	31540381	31543987	3607	1	ENSG00000284543	ENST00000639047	10560	NA	NA	NA
10	15200454	15201137	684	*	9.44	9.6	9.25	0.34	0.00107	0.118	Distal Intergenic	455	15171036	15171278	243	2	ENSG00000228181	ENST00000450788	-29176	NA	NA	NA
19	40798063	40799866	1804	*	11.88	12	11.75	0.25	0.00107	0.118	Promoter (<=1kb)	464	40798996	40800875	1880	1	ENSG00000269858	ENST00000598654	0	112398	EGLN2	egl-9 family hypoxia inducible factor 2
19	42295738	42296564	827	*	9.37	9.19	9.54	-0.34	0.00108	0.119	Promoter (1-2kb)	464	42294460	42295005	546	1	ENSG00000079432	ENST00000571033	1278	23152	CIC	capicua transcriptional repressor
1	234631574	234632215	642	*	8.85	9.04	8.62	0.42	0.00108	0.119	Promoter (2-3kb)	446	234629311	234634780	5470	1	ENSG00000224939	ENST00000429269	2263	100302691	LINC00184	long intergenic non-protein coding RNA 184
6	100300174	100300881	708	*	9.58	9.73	9.41	0.32	0.00108	0.119	Distal Intergenic	451	100391083	100394042	2960	2	ENSG00000112246	ENST00000505753	93161	6492	SIM1	SIM bHLH transcription factor 1
20	40688482	40690369	1888	*	12.1	11.99	12.2	-0.21	0.00108	0.119	Promoter (<=1kb)	465	40685848	40689236	3389	2	ENSG00000204103	ENST00000373313	0	9935	MAFB	MAF bZIP transcription factor B
6	83511825	83512866	1042	*	9.29	9.09	9.46	-0.37	0.00108	0.119	Promoter (<=1kb)	451	83512534	83525704	13171	1	ENSG00000146250	ENST00000369700	0	167681	PRSS35	serine protease 35
9	118318657	118319371	715	*	9.74	9.9	9.56	0.34	0.00109	0.119	Distal Intergenic	454	118082869	118083382	514	2	ENSG00000234782	ENST00000413759	-235275	NA	NA	NA
2	41877154	41877698	545	*	8.09	7.8	8.33	-0.53	0.00109	0.119	Promoter (<=1kb)	447	41877554	41894050	16497	1	ENSG00000214691	ENST00000398796	0	388942	LINC01913	long intergenic non-protein coding RNA 1913
2	567404	568831	1428	*	10.96	10.83	11.08	-0.25	0.0011	0.12	Intron (ENST00000444079/ENSG00000233633, intron 4 of 4)	447	559128	560778	1651	1	ENSG00000233633	ENST00000654620	8276	105373352	LOC105373352	uncharacterized LOC105373352
19	38734328	38735598	1271	*	10.35	10.2	10.48	-0.28	0.00111	0.12	Promoter (<=1kb)	464	38730187	38735410	5224	2	ENSG00000182472	ENST00000594552	0	147968	CAPN12	calpain 12
8	110848077	110848688	612	*	8	8.24	7.7	0.54	0.00111	0.12	Distal Intergenic	453	110809394	110809894	501	2	ENSG00000253994	ENST00000521269	-38183	NA	NA	NA
9	127505840	127506211	372	*	9.06	8.85	9.24	-0.39	0.00111	0.12	3' UTR	454	127509888	127516893	7006	2	ENSG00000136830	ENST00000465154	10682	64855	NIBAN2	niban apoptosis regulator 2
9	124776919	124777819	901	*	11.12	10.99	11.23	-0.24	0.00111	0.12	Promoter (<=1kb)	454	124777133	124814882	37750	1	ENSG00000185585	ENST00000373580	0	169611	OLFML2A	olfactomedin like 2A
1	6448189	6449484	1296	*	10.34	10.2	10.46	-0.27	0.00112	0.12	Promoter (<=1kb)	446	6448467	6460052	11586	1	ENSG00000187017	ENST00000475228	0	83715	ESPN	espin
16	19810997	19811881	885	*	8.22	8.45	7.95	0.5	0.00112	0.121	Intron (ENST00000308214/ENSG00000174628, intron 6 of 7)	461	19819504	19819628	125	2	ENSG00000261939	ENST00000575306	7747	NA	NA	NA
16	88743783	88744343	561	*	8.99	8.77	9.18	-0.41	0.00112	0.121	Promoter (<=1kb)	461	88742821	88745464	2644	1	ENSG00000182376	ENST00000567588	962	339059	LOC339059	uncharacterized LOC339059
19	1106899	1107433	535	*	10.01	9.86	10.15	-0.3	0.00113	0.121	Promoter (1-2kb)	464	1105454	1106779	1326	1	ENSG00000167468	ENST00000585480	1445	2879	GPX4	glutathione peroxidase 4
5	174336708	174338987	2280	*	11.64	11.53	11.74	-0.21	0.00114	0.123	Promoter (<=1kb)	450	174336495	174527139	190645	1	ENSG00000249306	ENST00000510234	213	101928176	LINC01411	long intergenic non-protein coding RNA 1411
1	38005141	38005966	826	*	10.67	10.81	10.52	0.28	0.00115	0.123	Promoter (<=1kb)	446	37996770	38005502	8733	2	ENSG00000183386	ENST00000485803	0	2275	FHL3	four and a half LIM domains 3
12	53213098	53213867	770	*	9.68	9.51	9.84	-0.32	0.00115	0.123	Promoter (<=1kb)	457	53214094	53214857	764	2	ENSG00000172819	ENST00000551580	990	5916	RARG	retinoic acid receptor gamma
6	11009398	11009903	506	*	8.51	8.72	8.27	0.45	0.00116	0.124	Intron (ENST00000354666/ENSG00000197977, intron 2 of 7)	451	11015586	11015888	303	1	ENSG00000274541	ENST00000620852	-5683	NA	NA	NA
12	132489481	132490266	786	*	10.21	10.35	10.05	0.3	0.00116	0.124	Promoter (<=1kb)	457	132489551	132585188	95638	1	ENSG00000112787	ENST00000434748	0	57666	FBRSL1	fibrosin like 1
2	206442854	206444170	1317	*	9.43	9.61	9.22	0.38	0.00116	0.124	Promoter (<=1kb)	447	206443532	206621127	177596	1	ENSG00000114948	ENST00000264377	0	8745	ADAM23	ADAM metallopeptidase domain 23
10	112951881	112952661	781	*	9.88	9.71	10.02	-0.31	0.00117	0.125	Promoter (<=1kb)	455	112950646	112951875	1230	2	ENSG00000233547	ENST00000369391	-6	NA	NA	NA
12	26648494	26649016	523	*	8.41	8.63	8.16	0.47	0.00118	0.125	Exon (ENST00000414098/ENSG00000234428, exon 3 of 3)	457	26621182	26630714	9533	2	ENSG00000123104	ENST00000545902	-17780	3709	ITPR2	inositol 1,4,5-trisphosphate receptor type 2
17	64661106	64662893	1788	*	11.2	11.32	11.07	0.25	0.00118	0.125	Promoter (<=1kb)	462	64542282	64662307	120026	2	ENSG00000108854	ENST00000262435	0	64750	SMURF2	SMAD specific E3 ubiquitin protein ligase 2
12	93090704	93091174	471	*	8.05	8.29	7.76	0.53	0.00119	0.125	Promoter (<=1kb)	457	93090522	93107600	17079	1	ENSG00000257746	ENST00000551928	182	NA	NA	NA
1	32789255	32789926	672	*	9.67	9.82	9.51	0.32	0.00119	0.125	Promoter (2-3kb)	446	32775991	32786734	10744	2	ENSG00000134684	ENST00000478828	-2521	8565	YARS1	tyrosyl-tRNA synthetase 1
19	7925614	7926393	780	*	9.87	10.02	9.71	0.31	0.00119	0.125	Promoter (<=1kb)	464	7924491	7926135	1645	2	ENSG00000178531	ENST00000318978	0	404217	CTXN1	cortexin 1
18	67386000	67386560	561	*	7.81	8.09	7.47	0.61	0.0012	0.126	Distal Intergenic	463	67375133	67375305	173	1	ENSG00000265936	ENST00000579213	10867	NA	NA	NA
1	36368989	36369502	514	*	8.52	8.28	8.73	-0.45	0.0012	0.126	Promoter (2-3kb)	446	36355205	36366072	10868	2	ENSG00000196182	ENST00000460417	-2917	83931	STK40	serine/threonine kinase 40
15	55388605	55389830	1226	*	10.38	10.51	10.25	0.26	0.00121	0.126	5' UTR	460	55371987	55398268	26282	2	ENSG00000260916	ENST00000570272	8438	9236	CCPG1	cell cycle progression 1
3	140952944	140953869	926	*	9.82	9.97	9.65	0.32	0.00122	0.127	Promoter (2-3kb)	448	140956525	140976286	19762	1	ENSG00000114120	ENST00000512023	-2656	55186	SLC25A36	solute carrier family 25 member 36
8	129848529	129849425	897	*	9.89	10.03	9.74	0.29	0.00122	0.127	Promoter (1-2kb)	453	129842080	129847317	5238	2	ENSG00000153310	ENST00000520887	-1212	51571	FAM49B	family with sequence similarity 49 member B
8	32547746	32549420	1675	*	11.03	10.91	11.13	-0.23	0.00122	0.127	Promoter (<=1kb)	453	32548210	32760989	212780	1	ENSG00000157168	ENST00000523079	0	3084	NRG1	neuregulin 1
2	225100793	225101355	563	*	9.25	9.42	9.05	0.36	0.00123	0.127	Distal Intergenic	447	224765090	225042468	277379	2	ENSG00000135905	ENST00000258390	-58325	55619	DOCK10	dedicator of cytokinesis 10
1	204057253	204058115	863	*	9.26	9.43	9.07	0.36	0.00123	0.127	Distal Intergenic	446	204073115	204119859	46745	1	ENSG00000143842	ENST00000367203	-15000	9580	SOX13	SRY-box transcription factor 13
1	37486909	37487700	792	*	9.76	9.6	9.91	-0.32	0.00123	0.127	Downstream (2-3kb)	446	37481690	37482602	913	1	ENSG00000163874	ENST00000471012	5219	80149	ZC3H12A	zinc finger CCCH-type containing 12A
1	93447668	93449648	1981	*	11.65	11.53	11.76	-0.23	0.00124	0.128	Promoter (<=1kb)	446	93448131	93554659	106529	1	ENSG00000137942	ENST00000260506	0	54874	FNBP1L	formin binding protein 1 like
10	126375751	126376473	723	*	9.76	9.91	9.6	0.31	0.00124	0.128	Intron (ENST00000368679/ENSG00000148848, intron 1 of 22)	455	126012381	126388455	376075	2	ENSG00000148848	ENST00000368679	11982	8038	ADAM12	ADAM metallopeptidase domain 12
5	17096804	17097511	708	*	9.34	9.51	9.16	0.35	0.00124	0.128	Intron (ENST00000606445/ENSG00000176788, intron 2 of 3)	450	17107360	17107789	430	2	ENSG00000271892	ENST00000606282	10278	NA	NA	NA
2	234686293	234686867	575	*	9.21	9.38	9.03	0.36	0.00125	0.128	Intron (ENST00000629370/ENSG00000280744, intron 1 of 2)	447	234682668	234717764	35097	1	ENSG00000280744	ENST00000629370	3625	106144537	LINC01173	long intergenic non-protein coding RNA 1173
13	84568817	84569830	1014	*	9.06	9.24	8.86	0.38	0.00125	0.128	Distal Intergenic	458	84562364	84563236	873	1	ENSG00000233349	ENST00000446314	6453	NA	NA	NA
19	9818498	9819905	1408	*	12.27	12.39	12.14	0.25	0.00125	0.128	Promoter (<=1kb)	464	9810267	9818829	8563	2	ENSG00000127452	ENST00000586651	0	54850	FBXL12	F-box and leucine rich repeat protein 12
3	191356375	191357456	1082	*	10.42	10.55	10.28	0.26	0.00125	0.128	Exon (ENST00000392456/ENSG00000152492, exon 2 of 11)	448	191361103	191370281	9179	1	ENSG00000152492	ENST00000460064	-3647	152137	CCDC50	coiled-coil domain containing 50
10	44906516	44907144	629	*	8.19	7.91	8.43	-0.53	0.00126	0.128	Exon (ENST00000436877/ENSG00000234504, exon 2 of 3)	455	44911316	44935194	23879	1	ENSG00000187783	ENST00000544540	-4172	643236	TMEM72	transmembrane protein 72
2	56183576	56185550	1975	*	11.45	11.34	11.55	-0.22	0.00126	0.128	Promoter (<=1kb)	447	56183990	56386172	202183	1	ENSG00000055813	ENST00000407595	0	114800	CCDC85A	coiled-coil domain containing 85A
2	27992874	27993832	959	*	8.58	8.78	8.34	0.44	0.00126	0.128	Promoter (2-3kb)	447	27996367	27996449	83	1	ENSG00000265321	ENST00000584745	-2535	100422965	MIR4263	microRNA 4263
1	216462219	216462842	624	*	8.31	8.54	8.04	0.5	0.00126	0.128	Distal Intergenic	446	215622891	216423448	800558	2	ENSG00000042781	ENST00000674083	-38771	7399	USH2A	usherin
17	76026532	76027860	1329	*	11.84	11.73	11.94	-0.21	0.00127	0.128	Promoter (<=1kb)	462	76006845	76027306	20462	2	ENSG00000167880	ENST00000301607	0	2125	EVPL	envoplakin
2	9813449	9814403	955	*	9.12	8.92	9.3	-0.38	0.00127	0.128	Distal Intergenic	447	9843443	9846113	2671	1	ENSG00000115750	ENST00000625239	-29040	9014	TAF1B	TATA-box binding protein associated factor, RNA polymerase I subunit B
6	117498135	117498659	525	*	8.94	9.12	8.73	0.39	0.00128	0.129	Intron (ENST00000525483/ENSG00000164465, intron 3 of 3)	451	117503559	117569858	66300	1	ENSG00000164465	ENST00000533453	-4900	285761	DCBLD1	discoidin, CUB and LCCL domain containing 1
5	150161258	150162391	1134	*	10.21	10.05	10.34	-0.29	0.00128	0.129	Distal Intergenic	450	150166778	150184558	17781	1	ENSG00000113722	ENST00000231656	-4387	1044	CDX1	caudal type homeobox 1
2	138364278	138365133	856	*	8.94	9.14	8.7	0.45	0.00128	0.129	Distal Intergenic	447	138412066	138413318	1253	2	ENSG00000232915	ENST00000427150	48185	NA	NA	NA
20	44362281	44363004	724	*	8.61	8.81	8.37	0.44	0.00128	0.129	Intron (ENST00000316673/ENSG00000101076, intron 1 of 9)	465	44355805	44407474	51670	1	ENSG00000101076	ENST00000609262	6476	3172	HNF4A	hepatocyte nuclear factor 4 alpha
10	114937835	114938997	1163	*	10.2	10.06	10.33	-0.27	0.00129	0.13	Promoter (<=1kb)	455	114938195	114977676	39482	1	ENSG00000165832	ENST00000298746	0	142940	TRUB1	TruB pseudouridine synthase family member 1
6	34680784	34681595	812	*	8.82	9.02	8.59	0.43	0.0013	0.13	Intron (ENST00000374023/ENSG00000196821, intron 1 of 4)	451	34685355	34685642	288	2	ENSG00000265123	ENST00000585129	4047	NA	NA	NA
9	83885202	83886249	1048	*	10.45	10.59	10.29	0.3	0.0013	0.13	Intron (ENST00000297814/ENSG00000165115, intron 9 of 17)	454	83880118	83889270	9153	2	ENSG00000165115	ENST00000376347	3021	55582	KIF27	kinesin family member 27
3	145449777	145450617	841	*	7.79	8.05	7.47	0.58	0.0013	0.13	Distal Intergenic	448	145523538	145524415	878	1	ENSG00000244024	ENST00000481075	-72921	NA	NA	NA
12	126668317	126669444	1128	*	10.95	10.81	11.07	-0.26	0.00132	0.131	Intron (ENST00000545853/ENSG00000256732, intron 1 of 1)	457	126675895	126676243	349	2	ENSG00000278866	ENST00000623427	6799	NA	NA	NA
3	9986417	9987662	1246	*	10.85	10.72	10.97	-0.26	0.00132	0.131	Promoter (<=1kb)	448	9962537	9987120	24584	2	ENSG00000125037	ENST00000245046	0	55831	EMC3	ER membrane protein complex subunit 3
5	39717494	39717950	457	*	8.41	8.62	8.16	0.46	0.00132	0.131	Downstream (1-2kb)	450	39718984	39721513	2530	2	ENSG00000250492	ENST00000504674	3563	NA	NA	NA
1	51896878	51898716	1839	*	9.92	10.06	9.76	0.3	0.00133	0.132	Distal Intergenic	446	51789196	51878937	89742	2	ENSG00000078618	ENST00000544028	-17941	4898	NRDC	nardilysin convertase
5	28534877	28535564	688	*	8.2	8.43	7.93	0.51	0.00133	0.132	Distal Intergenic	450	28549736	28558535	8800	2	ENSG00000250453	ENST00000666077	22971	NA	NA	NA
15	43132929	43134449	1521	*	10.99	10.86	11.1	-0.24	0.00133	0.132	Promoter (<=1kb)	460	43133144	43148788	15645	1	ENSG00000137842	ENST00000569535	0	80021	TMEM62	transmembrane protein 62
X	39759343	39760372	1030	*	10.48	10.35	10.6	-0.25	0.00134	0.132	Distal Intergenic	468	39786524	39786823	300	2	ENSG00000264618	ENST00000581157	26451	NA	NA	NA
5	24162993	24163468	476	*	7.77	8.02	7.45	0.57	0.00134	0.132	Intron (ENST00000512559/ENSG00000248874, intron 4 of 4)	450	24170370	24171246	877	1	ENSG00000226432	ENST00000514047	-6902	NA	NA	NA
20	36454446	36455499	1054	*	9.06	9.24	8.86	0.38	0.00134	0.132	Intron (ENST00000373913/ENSG00000080845, intron 7 of 12)	465	36461338	36528637	67300	1	ENSG00000080845	ENST00000475894	-5839	22839	DLGAP4	DLG associated protein 4
10	22712972	22715050	2079	*	10.57	10.69	10.44	0.26	0.00135	0.132	Promoter (<=1kb)	455	22534854	22714578	179725	2	ENSG00000150867	ENST00000376573	0	5305	PIP4K2A	phosphatidylinositol-5-phosphate 4-kinase type 2 alpha
2	219541645	219542212	568	*	10.18	10.04	10.31	-0.27	0.00135	0.132	Promoter (<=1kb)	447	219538948	219543097	4150	2	ENSG00000123989	ENST00000535926	885	79586	CHPF	chondroitin polymerizing factor
5	28305650	28306778	1129	*	9.95	10.11	9.77	0.35	0.00135	0.132	Distal Intergenic	450	28285964	28287807	1844	2	ENSG00000249785	ENST00000664667	-17843	105374698	LINC02103	long intergenic non-protein coding RNA 2103
14	68816189	68817007	819	*	10.98	10.85	11.09	-0.23	0.00136	0.132	Distal Intergenic	459	68789945	68796253	6309	2	ENSG00000185650	ENST00000557086	-19936	677	ZFP36L1	ZFP36 ring finger protein like 1
X	103585299	103586648	1350	*	9.88	9.73	10.03	-0.3	0.00136	0.132	Promoter (<=1kb)	468	103585492	103587518	2027	1	ENSG00000133142	ENST00000468024	0	79921	TCEAL4	transcription elongation factor A like 4
5	20286499	20286990	492	*	9.48	9.65	9.29	0.36	0.00136	0.132	Intron (ENST00000507958/ENSG00000145526, intron 1 of 14)	450	20304045	20305448	1404	2	ENSG00000214132	ENST00000502634	18458	NA	NA	NA
8	115326740	115327363	624	*	8.47	8.69	8.21	0.48	0.00137	0.133	Distal Intergenic	453	115414429	115492221	77793	2	ENSG00000104447	ENST00000518018	164858	7227	TRPS1	transcriptional repressor GATA binding 1
10	133373034	133373885	852	*	10.89	11.02	10.75	0.28	0.00137	0.133	Promoter (<=1kb)	455	133362485	133373354	10870	2	ENSG00000127884	ENST00000368547	0	1892	ECHS1	enoyl-CoA hydratase, short chain 1
2	28750759	28752626	1868	*	12.02	11.9	12.13	-0.23	0.00137	0.133	Promoter (<=1kb)	447	28751640	28783978	32339	1	ENSG00000213639	ENST00000455580	0	5500	PPP1CB	protein phosphatase 1 catalytic subunit beta
7	28955816	28957535	1720	*	10.51	10.37	10.64	-0.26	0.00138	0.133	Promoter (<=1kb)	452	28957667	28959345	1679	1	ENSG00000228421	ENST00000436594	-132	NA	NA	NA
17	81910540	81911847	1308	*	11.56	11.67	11.43	0.24	0.00138	0.133	Promoter (<=1kb)	462	81900958	81911399	10442	2	ENSG00000185813	ENST00000538936	0	5833	PCYT2	phosphate cytidylyltransferase 2, ethanolamine
22	38871315	38872725	1411	*	10.3	10.45	10.14	0.31	0.00138	0.133	Promoter (<=1kb)	467	38861422	38872216	10795	2	ENSG00000183741	ENST00000407418	0	23466	CBX6	chromobox 6
18	72427304	72428238	935	*	9.13	9.3	8.94	0.37	0.00139	0.133	Distal Intergenic	463	72536684	72540298	3615	2	ENSG00000141668	ENST00000581425	112060	147381	CBLN2	cerebellin 2 precursor
18	22385096	22386346	1251	*	8.73	8.92	8.51	0.41	0.00139	0.133	Distal Intergenic	463	22413601	22414867	1267	2	ENSG00000212710	ENST00000525417	28521	64693	CTAGE1	cutaneous T cell lymphoma-associated antigen 1
4	151195701	151196416	716	*	8.11	8.36	7.81	0.55	0.0014	0.134	Intron (ENST00000409598/ENSG00000109686, intron 2 of 19)	449	151121820	151175552	53733	2	ENSG00000109686	ENST00000427414	-20149	152503	SH3D19	SH3 domain containing 19
6	108737939	108738389	451	*	8.42	8.63	8.17	0.45	0.00141	0.134	Distal Intergenic	451	108751654	108768456	16803	1	ENSG00000203801	ENST00000416104	-13265	387111	LINC00222	long intergenic non-protein coding RNA 222
17	17990090	17991519	1430	*	10.59	10.71	10.46	0.25	0.00141	0.134	Promoter (1-2kb)	462	17992765	18016651	23887	1	ENSG00000171962	ENST00000583171	-1246	83450	DRC3	dynein regulatory complex subunit 3
2	197460704	197461669	966	*	9.35	9.51	9.17	0.34	0.00141	0.134	Intron (ENST00000263960/ENSG00000115520, intron 2 of 4)	447	197453794	197474410	20617	1	ENSG00000115520	ENST00000409010	6910	80219	COQ10B	coenzyme Q10B
15	90931688	90932774	1087	*	11.6	11.49	11.7	-0.21	0.00141	0.134	Promoter (<=1kb)	460	90929968	90932549	2582	2	ENSG00000184508	ENST00000394272	0	374659	HDDC3	HD domain containing 3
7	139328392	139328851	460	*	7.7	7.97	7.38	0.59	0.00141	0.134	Distal Intergenic	452	139339457	139345795	6339	1	ENSG00000164898	ENST00000468383	-10606	154791	FMC1	formation of mitochondrial complex V assembly factor 1 homolog
4	140728001	140728732	732	*	9.66	9.81	9.49	0.32	0.00141	0.134	Intron (ENST00000442267/ENSG00000109436, intron 1 of 20)	449	140712168	140716081	3914	1	ENSG00000248335	ENST00000503844	15833	NA	NA	NA
5	31408060	31409225	1166	*	9.91	10.04	9.75	0.29	0.00141	0.134	Promoter (<=1kb)	450	31408736	31409551	816	2	ENSG00000113360	ENST00000509067	326	29102	DROSHA	drosha ribonuclease III
1	230066628	230068384	1757	*	11.97	12.09	11.84	0.25	0.00142	0.134	Promoter (<=1kb)	446	230067238	230282122	214885	1	ENSG00000143641	ENST00000366672	0	2590	GALNT2	polypeptide N-acetylgalactosaminyltransferase 2
1	156728094	156729281	1188	*	12.14	12.04	12.24	-0.2	0.00142	0.134	Promoter (<=1kb)	446	156728442	156736949	8508	1	ENSG00000143303	ENST00000368218	0	51093	RRNAD1	ribosomal RNA adenine dimethylase domain containing 1
16	50152373	50154750	2378	*	11.46	11.58	11.34	0.24	0.00142	0.134	Promoter (<=1kb)	461	50152911	50235310	82400	1	ENSG00000121274	ENST00000436909	0	64282	TENT4B	terminal nucleotidyltransferase 4B
5	3531327	3531875	549	*	8.68	8.88	8.44	0.44	0.00142	0.134	Promoter (<=1kb)	450	3357264	3531795	174532	2	ENSG00000248118	ENST00000662836	0	285577	LINC01019	long intergenic non-protein coding RNA 1019
1	201113906	201115166	1261	*	11.48	11.37	11.59	-0.22	0.00143	0.134	Promoter (<=1kb)	446	201113953	201115372	1420	2	ENSG00000232237	ENST00000458416	206	647219	ASCL5	achaete-scute family bHLH transcription factor 5
1	169363276	169363716	441	*	8.61	8.81	8.38	0.42	0.00143	0.134	Intron (ENST00000367811/ENSG00000143156, intron 1 of 11)	446	169230714	169367730	137017	2	ENSG00000143156	ENST00000528517	4014	29922	NME7	NME/NM23 family member 7
19	4399258	4400872	1615	*	10.97	11.09	10.84	0.25	0.00143	0.134	Promoter (<=1kb)	464	4360370	4400547	40178	2	ENSG00000141985	ENST00000269886	0	6455	SH3GL1	SH3 domain containing GRB2 like 1, endophilin A2
12	124388740	124389701	962	*	11.36	11.25	11.47	-0.22	0.00143	0.134	Promoter (<=1kb)	457	124372460	124388824	16365	2	ENSG00000196498	ENST00000448614	0	9612	NCOR2	nuclear receptor corepressor 2
15	65384605	65386166	1562	*	11.76	11.66	11.86	-0.21	0.00145	0.135	Promoter (<=1kb)	460	65381487	65385770	4284	2	ENSG00000103742	ENST00000558048	0	57722	IGDCC4	immunoglobulin superfamily DCC subclass member 4
5	169121473	169122349	877	*	10.59	10.46	10.7	-0.24	0.00145	0.135	Intron (ENST00000519560/ENSG00000184347, intron 4 of 35)	450	169030438	169037998	7561	1	ENSG00000248222	ENST00000508470	91035	NA	NA	NA
15	68559017	68560290	1274	*	10.88	10.76	10.99	-0.23	0.00145	0.135	Distal Intergenic	460	68578993	68727806	148814	1	ENSG00000103647	ENST00000261861	-18703	10391	CORO2B	coronin 2B
3	106114118	106115298	1181	*	10.09	10.23	9.93	0.3	0.00145	0.135	Distal Intergenic	448	106160417	106224375	63959	1	ENSG00000287421	ENST00000667697	-45119	NA	NA	NA
12	93229404	93229988	585	*	8.4	8.61	8.15	0.47	0.00146	0.136	Distal Intergenic	457	93003758	93215679	211922	2	ENSG00000257322	ENST00000549930	-13725	NA	NA	NA
4	146329015	146329663	649	*	8.31	8.53	8.04	0.49	0.00147	0.136	Intron (ENST00000432059/ENSG00000120519, intron 4 of 10)	449	146408583	146408688	106	1	ENSG00000278438	ENST00000619235	-78920	102465837	MIR7849	microRNA 7849
16	54193497	54194965	1469	*	11.62	11.52	11.72	-0.21	0.00147	0.137	Distal Intergenic	461	54149690	54158512	8823	1	ENSG00000140718	ENST00000637049	43807	79068	FTO	FTO alpha-ketoglutarate dependent dioxygenase
4	84673474	84674165	692	*	8.06	8.29	7.78	0.51	0.00148	0.137	Intron (ENST00000295888/ENSG00000163625, intron 67 of 67)	449	84672291	84682948	10658	2	ENSG00000163625	ENST00000425179	8783	23001	WDFY3	WD repeat and FYVE domain containing 3
2	197692944	197693895	952	*	9.17	8.98	9.34	-0.36	0.00148	0.137	Promoter (<=1kb)	447	197693106	197774823	81718	1	ENSG00000222017	ENST00000409845	0	NA	NA	NA
6	74931492	74932033	542	*	8.57	8.77	8.34	0.43	0.00148	0.137	Distal Intergenic	451	74849077	74850484	1408	2	ENSG00000219736	ENST00000406203	-81008	NA	NA	NA
12	52082693	52083733	1041	*	9.2	9.01	9.37	-0.36	0.00149	0.137	Promoter (<=1kb)	457	52076841	52082084	5244	2	ENSG00000257663	ENST00000550301	-609	NA	NA	NA
10	21336481	21337275	795	*	10.47	10.6	10.33	0.26	0.00149	0.137	Downstream (2-3kb)	455	21321961	21322067	107	1	ENSG00000207264	ENST00000384534	14520	NA	NA	NA
7	11896452	11897067	616	*	8.76	8.95	8.54	0.41	0.0015	0.138	Distal Intergenic	452	11370437	11832198	461762	2	ENSG00000005108	ENST00000617773	-64254	221981	THSD7A	thrombospondin type 1 domain containing 7A
1	9181059	9183151	2093	*	11.26	11.14	11.37	-0.23	0.0015	0.138	Promoter (<=1kb)	446	9148011	9182392	34382	2	ENSG00000228526	ENST00000635687	0	106614088	MIR34AHG	MIR34A host gene
1	9494944	9495784	841	*	8.89	8.67	9.09	-0.41	0.0015	0.138	Distal Intergenic	446	9501092	9503471	2380	2	ENSG00000235263	ENST00000441033	7687	NA	NA	NA
7	129948877	129949872	996	*	11.5	11.39	11.59	-0.21	0.0015	0.138	Promoter (1-2kb)	452	129834941	129951327	116387	2	ENSG00000186591	ENST00000496698	1455	7328	UBE2H	ubiquitin conjugating enzyme E2 H
5	74639822	74641652	1831	*	12.39	12.28	12.49	-0.21	0.00151	0.138	Promoter (<=1kb)	450	74640023	74721288	81266	1	ENSG00000049860	ENST00000511181	0	3074	HEXB	hexosaminidase subunit beta
9	35673354	35674525	1172	*	10.2	10.33	10.06	0.27	0.00153	0.139	Promoter (<=1kb)	454	35673918	35681155	7238	1	ENSG00000107159	ENST00000617161	0	768	CA9	carbonic anhydrase 9
5	110478729	110479409	681	*	9.77	9.92	9.61	0.3	0.00153	0.14	Intron (ENST00000508571/ENSG00000186952, intron 5 of 5)	450	110513829	110513915	87	2	ENSG00000221436	ENST00000408509	34506	100302159	MIR548F3	microRNA 548f-3
13	48782443	48784145	1703	*	11.41	11.3	11.52	-0.22	0.00154	0.14	Distal Intergenic	458	48771128	48771827	700	1	ENSG00000225131	ENST00000453033	11315	NA	NA	NA
7	122885596	122887154	1559	*	11.11	10.98	11.23	-0.25	0.00155	0.14	Promoter (<=1kb)	452	122318411	122886460	568050	2	ENSG00000081803	ENST00000449022	0	93664	CADPS2	calcium dependent secretion activator 2
4	185358500	185359413	914	*	9.38	9.53	9.2	0.33	0.00155	0.14	Intron (ENST00000618785/ENSG00000109762, intron 15 of 17)	449	185353058	185362059	9002	1	ENSG00000109762	ENST00000513433	5442	83891	SNX25	sorting nexin 25
4	128358046	128358758	713	*	10.46	10.31	10.58	-0.27	0.00155	0.14	Intron (ENST00000505133/ENSG00000251432, intron 3 of 4)	449	128292933	128474996	182064	1	ENSG00000251432	ENST00000509834	65113	100507487	LINC02615	long intergenic non-protein coding RNA 2615
5	21195125	21195805	681	*	9.53	9.67	9.36	0.32	0.00155	0.14	Promoter (<=1kb)	450	21196720	21196860	141	1	ENSG00000248286	ENST00000502928	-915	NA	NA	NA
19	48259689	48260458	770	*	9.37	9.19	9.53	-0.34	0.00156	0.141	Downstream (2-3kb)	464	48211566	48255946	44381	2	ENSG00000105483	ENST00000521613	-3743	22900	CARD8	caspase recruitment domain family member 8
2	240851024	240851852	829	*	8.58	8.35	8.78	-0.43	0.00157	0.141	Distal Intergenic	447	240868824	240880500	11677	1	ENSG00000172482	ENST00000307503	-16972	189	AGXT	alanine--glyoxylate and serine--pyruvate aminotransferase
7	84637509	84638413	905	*	8.59	8.79	8.36	0.43	0.00157	0.141	Distal Intergenic	452	84549206	84584322	35117	1	ENSG00000235139	ENST00000446000	88303	101927378	LOC101927378	uncharacterized LOC101927378
5	40689439	40689903	465	*	9.94	10.09	9.78	0.31	0.00158	0.141	Intron (ENST00000302472/ENSG00000171522, intron 2 of 2)	450	40681702	40692043	10342	1	ENSG00000171522	ENST00000513635	7737	5734	PTGER4	prostaglandin E receptor 4
19	41872764	41873613	850	*	9.68	9.52	9.83	-0.31	0.00158	0.141	3' UTR	464	41869627	41869698	72	1	ENSG00000276926	ENST00000621706	3137	102465478	MIR6797	microRNA 6797
8	30364119	30364904	786	*	8.99	9.17	8.79	0.37	0.00158	0.141	Distal Intergenic	453	30352008	30353342	1335	1	ENSG00000127589	ENST00000248151	12111	NA	NA	NA
12	546952	547338	387	*	8.6	8.37	8.8	-0.43	0.00158	0.141	Promoter (<=1kb)	457	547639	563478	15840	1	ENSG00000139044	ENST00000647602	-301	283358	B4GALNT3	beta-1,4-N-acetyl-galactosaminyltransferase 3
5	30103083	30104256	1174	*	11.11	11.22	10.99	0.23	0.00159	0.141	Distal Intergenic	450	29979669	29983114	3446	1	ENSG00000280305	ENST00000623357	123414	NA	NA	NA
1	78917850	78919138	1289	*	9.22	9.38	9.03	0.35	0.00159	0.141	Promoter (<=1kb)	446	78889764	78917885	28122	2	ENSG00000162618	ENST00000401034	0	64123	ADGRL4	adhesion G protein-coupled receptor L4
5	24245716	24246168	453	*	7.82	8.07	7.52	0.56	0.00159	0.141	Intron (ENST00000652008/ENSG00000286134, intron 1 of 5)	450	24135160	24271821	136662	2	ENSG00000286134	ENST00000652008	25653	NA	NA	NA
12	85835809	85836848	1040	*	9.98	9.84	10.12	-0.28	0.00159	0.141	Promoter (<=1kb)	457	85800703	85836409	35707	2	ENSG00000198774	ENST00000361228	0	9182	RASSF9	Ras association domain family member 9
6	45724362	45724960	599	*	9.05	9.23	8.83	0.4	0.00159	0.141	Distal Intergenic	451	45573346	45576770	3425	2	ENSG00000261080	ENST00000563807	-147592	NA	NA	NA
14	64703972	64705817	1846	*	11.24	11.11	11.36	-0.25	0.0016	0.142	Promoter (<=1kb)	459	64704102	64730688	26587	1	ENSG00000126822	ENST00000555982	0	26030	PLEKHG3	pleckstrin homology and RhoGEF domain containing G3
12	88578935	88580930	1996	*	11.44	11.33	11.55	-0.22	0.0016	0.142	Promoter (<=1kb)	457	88492793	88580471	87679	2	ENSG00000049130	ENST00000644744	0	4254	KITLG	KIT ligand
6	47407542	47408348	807	*	8.13	8.36	7.87	0.49	0.0016	0.142	Distal Intergenic	451	47374561	47397398	22838	2	ENSG00000287485	ENST00000663906	-10144	NA	NA	NA
9	14347267	14349373	2107	*	11.74	11.64	11.84	-0.21	0.00161	0.142	Promoter (<=1kb)	454	14347320	14357908	10589	1	ENSG00000225472	ENST00000440947	0	NA	NA	NA
5	173334298	173334648	351	*	8.01	8.25	7.73	0.52	0.00161	0.142	Distal Intergenic	450	173314713	173329503	14791	2	ENSG00000113739	ENST00000265087	-4795	8614	STC2	stanniocalcin 2
19	49119507	49120446	940	*	9.57	9.4	9.73	-0.34	0.00161	0.142	Promoter (<=1kb)	464	49119544	49151026	31483	1	ENSG00000177380	ENST00000334186	0	8541	PPFIA3	PTPRF interacting protein alpha 3
6	157770757	157771439	683	*	9.38	9.54	9.21	0.33	0.00161	0.142	Intron (ENST00000614703/ENSG00000130340, intron 2 of 5)	451	157823246	157945077	121832	1	ENSG00000130340	ENST00000392185	-51807	51429	SNX9	sorting nexin 9
14	103519096	103519685	590	*	10.16	10.01	10.29	-0.27	0.00161	0.142	Promoter (1-2kb)	459	103520153	103520728	576	2	ENSG00000166165	ENST00000555366	1043	1152	CKB	creatine kinase B
2	58634004	58634352	349	*	8.08	8.32	7.79	0.53	0.00163	0.142	Promoter (<=1kb)	447	58633714	58697041	63328	1	ENSG00000233723	ENST00000662396	290	400955	LINC01122	long intergenic non-protein coding RNA 1122
1	144460780	144462020	1241	*	10.04	9.89	10.17	-0.28	0.00163	0.142	Promoter (<=1kb)	446	144421390	144461647	40258	2	ENSG00000266338	ENST00000488031	0	284565	NBPF15	NBPF member 15
1	17531514	17532591	1078	*	11.19	11.07	11.3	-0.23	0.00163	0.142	Distal Intergenic	446	17539698	17697869	158172	1	ENSG00000074964	ENST00000361221	-7107	55160	ARHGEF10L	Rho guanine nucleotide exchange factor 10 like
12	8389824	8390913	1090	*	9.02	8.82	9.19	-0.37	0.00163	0.142	Promoter (<=1kb)	457	8356963	8390337	33375	2	ENSG00000226091	ENST00000539348	0	389634	LINC00937	long intergenic non-protein coding RNA 937
7	15040762	15041733	972	*	8.96	9.15	8.75	0.4	0.00164	0.142	Distal Intergenic	452	15066207	15068651	2445	1	ENSG00000227489	ENST00000445093	-24474	NA	NA	NA
5	148808664	148809258	595	*	9.09	8.89	9.26	-0.37	0.00164	0.142	Distal Intergenic	450	148826611	148828623	2013	1	ENSG00000169252	ENST00000305988	-17353	154	ADRB2	adrenoceptor beta 2
8	106000189	106000904	716	*	8.7	8.89	8.47	0.42	0.00164	0.142	Intron (ENST00000520433/ENSG00000251003, intron 1 of 4)	453	105796940	106060443	263504	2	ENSG00000251003	ENST00000509144	59539	NA	NA	NA
5	177403240	177404858	1619	*	11.63	11.53	11.73	-0.2	0.00164	0.142	Promoter (<=1kb)	450	177402160	177404472	2313	2	ENSG00000131187	ENST00000502854	0	2161	F12	coagulation factor XII
9	37290748	37291523	776	*	8.21	8.44	7.95	0.49	0.00165	0.142	Intron (ENST00000336755/ENSG00000147905, intron 2 of 8)	454	37284163	37354802	70640	1	ENSG00000147905	ENST00000463625	6585	84186	ZCCHC7	zinc finger CCHC-type containing 7
18	13222412	13223582	1171	*	11.34	11.23	11.44	-0.21	0.00165	0.142	Intron (ENST00000590371/ENSG00000168675, intron 1 of 2)	463	13218787	13652755	433969	1	ENSG00000168675	ENST00000399848	3625	753	LDLRAD4	low density lipoprotein receptor class A domain containing 4
8	10590146	10590621	476	*	8.59	8.36	8.78	-0.42	0.00165	0.142	Distal Intergenic	453	10482878	10547585	64708	2	ENSG00000253649	ENST00000523024	-42561	NA	NA	NA
12	121466445	121468135	1691	*	11.62	11.74	11.49	0.25	0.00166	0.142	Promoter (2-3kb)	457	121444015	121470553	26539	2	ENSG00000089094	ENST00000538243	2418	84678	KDM2B	lysine demethylase 2B
22	28750269	28750968	700	*	8.86	9.04	8.65	0.39	0.00166	0.142	Intron (ENST00000216027/ENSG00000100209, intron 4 of 5)	467	28742701	28757510	14810	1	ENSG00000100209	ENST00000495977	7568	150274	HSCB	HscB mitochondrial iron-sulfur cluster cochaperone
6	36933138	36933777	640	*	8.48	8.68	8.24	0.44	0.00166	0.142	Distal Intergenic	451	36940071	36944675	4605	2	ENSG00000232598	ENST00000427609	10898	NA	NA	NA
9	127586061	127586860	800	*	9.79	9.63	9.93	-0.3	0.00166	0.142	Intron (ENST00000637521/ENSG00000136854, intron 1 of 19)	454	127579370	127690886	111517	1	ENSG00000136854	ENST00000637521	6691	6812	STXBP1	syntaxin binding protein 1
14	73633289	73634591	1303	*	9.72	9.54	9.87	-0.33	0.00166	0.142	Promoter (<=1kb)	459	73555115	73633722	78608	2	ENSG00000258603	ENST00000664243	0	NA	NA	NA
1	67889821	67890520	700	*	9.73	9.87	9.57	0.3	0.00166	0.142	Intron (ENST00000420587/ENSG00000232284, intron 1 of 9)	446	67701475	67833467	131993	2	ENSG00000172380	ENST00000370982	-56354	55970	GNG12	G protein subunit gamma 12
9	21381553	21382535	983	*	9.25	9.41	9.07	0.34	0.00166	0.142	Promoter (2-3kb)	454	21384255	21385398	1144	2	ENSG00000188379	ENST00000380206	2863	3440	IFNA2	interferon alpha 2
20	62318381	62319238	858	*	10.01	9.86	10.15	-0.28	0.00166	0.142	Promoter (<=1kb)	465	62318535	62319112	578	2	ENSG00000130702	ENST00000481120	0	3911	LAMA5	laminin subunit alpha 5
8	118111510	118112322	813	*	10.56	10.7	10.42	0.28	0.00166	0.142	Promoter (<=1kb)	453	117794490	118111826	317337	2	ENSG00000182197	ENST00000378204	0	2131	EXT1	exostosin glycosyltransferase 1
3	141659774	141660900	1127	*	10.39	10.25	10.52	-0.26	0.00167	0.142	Promoter (<=1kb)	448	141660536	141729387	68852	1	ENSG00000242104	ENST00000474979	0	NA	NA	NA
9	22211625	22212303	679	*	10.72	10.83	10.59	0.24	0.00167	0.142	Promoter (2-3kb)	454	22203990	22214672	10683	2	ENSG00000236921	ENST00000435092	2369	NA	NA	NA
4	119454245	119455325	1081	*	11.23	11.12	11.33	-0.21	0.00168	0.142	Promoter (<=1kb)	449	119454791	119460244	5454	1	ENSG00000245958	ENST00000511950	0	645513	LOC645513	septin 7 pseudogene
2	151032521	151033930	1410	*	10.23	10.09	10.35	-0.27	0.0017	0.144	Exon (ENST00000409243/ENSG00000222031, exon 4 of 5)	447	151001220	151048774	47555	2	ENSG00000222031	ENST00000409243	14844	NA	NA	NA
2	85753685	85755561	1877	*	11.16	11.03	11.29	-0.26	0.0017	0.144	Promoter (<=1kb)	447	85753991	85791383	37393	1	ENSG00000168874	ENST00000306279	0	84913	ATOH8	atonal bHLH transcription factor 8
20	3785398	3786454	1057	*	9.41	9.23	9.57	-0.35	0.0017	0.144	Promoter (<=1kb)	465	3783851	3786740	2890	2	ENSG00000125817	ENST00000379751	286	1059	CENPB	centromere protein B
1	176494037	176495177	1141	*	11.05	10.92	11.17	-0.24	0.00171	0.144	Intron (ENST00000367661/ENSG00000116183, intron 1 of 4)	446	176463175	176845601	382427	1	ENSG00000116183	ENST00000367662	30862	60676	PAPPA2	pappalysin 2
6	4775482	4777207	1726	*	11.2	11.32	11.08	0.24	0.00171	0.144	Promoter (<=1kb)	451	4776404	4955544	179141	1	ENSG00000153046	ENST00000397588	0	9425	CDYL	chromodomain Y like
22	50250484	50251642	1159	*	11.23	11.12	11.34	-0.22	0.00171	0.144	Promoter (<=1kb)	467	50245183	50251261	6079	2	ENSG00000100429	ENST00000415993	0	83933	HDAC10	histone deacetylase 10
15	48925617	48926354	738	*	9.32	9.48	9.15	0.33	0.00174	0.146	Intron (ENST00000332408/ENSG00000185634, intron 1 of 11)	460	48938236	48948031	9796	1	ENSG00000259602	ENST00000559620	-11882	NA	NA	NA
19	1168807	1169654	848	*	10.87	10.75	10.98	-0.23	0.00174	0.146	Promoter (<=1kb)	464	1127710	1169146	41437	2	ENSG00000064932	ENST00000587655	0	22904	SBNO2	strawberry notch homolog 2
7	1156704	1157100	397	*	8.74	8.93	8.53	0.4	0.00174	0.146	Promoter (<=1kb)	452	1152906	1157732	4827	2	ENSG00000178381	ENST00000574135	632	90637	ZFAND2A	zinc finger AN1-type containing 2A
2	101386509	101387934	1426	*	10.98	10.85	11.11	-0.25	0.00174	0.146	Promoter (<=1kb)	447	101345550	101387503	41954	2	ENSG00000175874	ENST00000324768	0	200407	CREG2	cellular repressor of E1A stimulated genes 2
16	28291643	28292880	1238	*	10.6	10.72	10.47	0.24	0.00174	0.146	Promoter (<=1kb)	461	28292525	28323849	31325	1	ENSG00000188322	ENST00000341901	0	388228	SBK1	SH3 domain binding kinase 1
3	16101412	16102087	676	*	8.04	8.28	7.76	0.52	0.00176	0.146	Distal Intergenic	448	16174680	16230165	55486	1	ENSG00000131386	ENST00000339732	-72593	117248	GALNT15	polypeptide N-acetylgalactosaminyltransferase 15
17	32205713	32206513	801	*	8.19	8.42	7.91	0.52	0.00176	0.146	Promoter (<=1kb)	462	32206925	32211435	4511	1	ENSG00000126858	ENST00000581148	-412	55288	RHOT1	ras homolog family member T1
17	27455859	27457109	1251	*	11.01	10.88	11.13	-0.24	0.00176	0.146	Promoter (<=1kb)	462	27456470	27626435	169966	1	ENSG00000141068	ENST00000644974	0	8844	KSR1	kinase suppressor of ras 1
16	81444232	81445850	1619	*	10.97	11.2	10.69	0.52	0.00176	0.146	Promoter (<=1kb)	461	81445170	81711762	266593	1	ENSG00000153815	ENST00000537098	0	80790	CMIP	c-Maf inducing protein
1	11178012	11178995	984	*	10.49	10.35	10.62	-0.27	0.00177	0.146	Intron (ENST00000361445/ENSG00000198793, intron 28 of 57)	446	11189355	11195981	6627	1	ENSG00000171819	ENST00000376819	-10360	10218	ANGPTL7	angiopoietin like 7
7	44573379	44574542	1164	*	11.56	11.45	11.65	-0.21	0.00177	0.146	Promoter (<=1kb)	452	44565417	44574002	8586	2	ENSG00000136271	ENST00000258772	0	54606	DDX56	DEAD-box helicase 56
8	123156892	123158195	1304	*	10.94	10.82	11.05	-0.23	0.00177	0.146	Promoter (<=1kb)	453	123157729	123165173	7445	1	ENSG00000287657	ENST00000654156	0	NA	NA	NA
15	57873513	57874235	723	*	9.09	9.26	8.9	0.36	0.00177	0.146	Distal Intergenic	460	57953425	57955269	1845	2	ENSG00000128918	ENST00000558384	81034	8854	ALDH1A2	aldehyde dehydrogenase 1 family member A2
5	90560788	90561368	581	*	8.12	8.36	7.83	0.53	0.00178	0.146	Promoter (1-2kb)	450	90558837	90627945	69109	1	ENSG00000164199	ENST00000640281	1951	84059	ADGRV1	adhesion G protein-coupled receptor V1
8	144502781	144504245	1465	*	11.31	11.19	11.41	-0.23	0.00178	0.146	Promoter (<=1kb)	453	144502973	144507174	4202	1	ENSG00000167701	ENST00000528431	0	2875	GPT	glutamic--pyruvic transaminase
5	129903755	129905808	2054	*	12.07	11.96	12.17	-0.21	0.00178	0.146	Promoter (<=1kb)	450	129904465	130186634	282170	1	ENSG00000198108	ENST00000305031	0	337876	CHSY3	chondroitin sulfate synthase 3
19	2627256	2627910	655	*	9.21	9.38	9.03	0.35	0.00178	0.146	Promoter (2-3kb)	464	2630715	2630793	79	1	ENSG00000277904	ENST00000618087	-2805	102465838	MIR7850	microRNA 7850
3	157572680	157573960	1281	*	10.17	10.01	10.31	-0.3	0.00178	0.146	Intron (ENST00000651325/ENSG00000174899, intron 4 of 4)	448	157569501	157578466	8966	1	ENSG00000174899	ENST00000652117	3179	152078	SLC66A1L	solute carrier family 66 member 1 like
7	33677550	33678002	453	*	7.78	8.02	7.47	0.55	0.00179	0.146	Intron (ENST00000672453/ENSG00000122507, intron 20 of 22)	452	33725981	33728456	2476	1	ENSG00000173862	ENST00000311067	-47979	NA	NA	NA
7	74093436	74095204	1769	*	12.19	12.09	12.28	-0.19	0.00179	0.146	Promoter (<=1kb)	452	74093956	74097189	3234	1	ENSG00000106683	ENST00000486361	0	3984	LIMK1	LIM domain kinase 1
1	94949543	94950393	851	*	8.75	8.94	8.54	0.4	0.00179	0.146	Intron (ENST00000659966/ENSG00000235501, intron 2 of 2)	446	94931461	94963210	31750	1	ENSG00000235501	ENST00000456582	18082	NA	NA	NA
22	24474082	24475032	951	*	9.24	9.41	9.05	0.35	0.00179	0.146	Exon (ENST00000326341/ENSG00000178803, exon 2 of 7)	467	24494107	24526668	32562	1	ENSG00000100024	ENST00000415388	-19075	51733	UPB1	beta-ureidopropionase 1
1	186834346	186835280	935	*	9.33	9.5	9.15	0.35	0.00179	0.146	Intron (ENST00000367466/ENSG00000116711, intron 1 of 17)	446	186828949	186988981	160033	1	ENSG00000116711	ENST00000367466	5397	5321	PLA2G4A	phospholipase A2 group IVA
5	177302889	177304606	1718	*	11.29	11.18	11.4	-0.22	0.0018	0.146	Promoter (<=1kb)	450	177301198	177303719	2522	2	ENSG00000169228	ENST00000303251	0	53917	RAB24	RAB24, member RAS oncogene family
12	57621540	57622266	727	*	8.69	8.44	8.91	-0.47	0.0018	0.146	Promoter (<=1kb)	457	57621047	57622771	1725	1	ENSG00000135502	ENST00000463802	493	65012	SLC26A10	solute carrier family 26 member 10
3	160225054	160226392	1339	*	11.33	11.22	11.43	-0.21	0.0018	0.146	Promoter (<=1kb)	448	160225496	160228213	2718	1	ENSG00000180044	ENST00000326474	0	401097	C3orf80	chromosome 3 open reading frame 80
15	92906764	92907010	247	*	8.56	8.75	8.33	0.42	0.0018	0.146	Promoter (2-3kb)	460	92904473	92949231	44759	1	ENSG00000173575	ENST00000626782	2291	1106	CHD2	chromodomain helicase DNA binding protein 2
16	84013716	84014722	1007	*	11.55	11.68	11.42	0.26	0.00181	0.146	Promoter (2-3kb)	461	84009667	84016756	7090	2	ENSG00000166558	ENST00000568003	2034	146167	SLC38A8	solute carrier family 38 member 8
22	31646286	31647126	841	*	9.73	9.88	9.56	0.31	0.00181	0.146	Intron (ENST00000460723/ENSG00000241878, intron 3 of 6)	467	31623684	31638445	14762	2	ENSG00000241878	ENST00000429683	-7841	23761	PISD	phosphatidylserine decarboxylase
7	11899224	11899673	450	*	7.99	8.23	7.71	0.52	0.00181	0.146	Distal Intergenic	452	11370437	11832198	461762	2	ENSG00000005108	ENST00000617773	-67026	221981	THSD7A	thrombospondin type 1 domain containing 7A
9	129458769	129459616	848	*	10.31	10.18	10.44	-0.26	0.00182	0.146	Distal Intergenic	454	129446632	129451422	4791	2	ENSG00000230676	ENST00000454408	-7347	NA	NA	NA
7	39688795	39689489	695	*	8.42	8.63	8.17	0.46	0.00182	0.146	Promoter (2-3kb)	452	39686687	39706308	19622	1	ENSG00000006451	ENST00000434466	2108	5898	RALA	RAS like proto-oncogene A
20	38164862	38165621	760	*	10.78	10.66	10.89	-0.23	0.00182	0.147	Promoter (<=1kb)	465	38127385	38165270	37886	2	ENSG00000198959	ENST00000361475	0	7052	TGM2	transglutaminase 2
1	248862843	248863713	871	*	11	10.88	11.11	-0.23	0.00183	0.147	Intron (ENST00000417047/ENSG00000227237, intron 2 of 2)	446	248859164	248864796	5633	1	ENSG00000227237	ENST00000417047	3679	NA	NA	NA
2	169694041	169694921	881	*	11.03	10.91	11.13	-0.22	0.00185	0.148	Promoter (<=1kb)	447	169694454	169701706	7253	1	ENSG00000144362	ENST00000616481	0	493911	PHOSPHO2	phosphatase, orphan 2
7	66326443	66327233	791	*	7.79	8.04	7.48	0.56	0.00185	0.148	Intron (ENST00000480281/ENSG00000169902, intron 2 of 4)	452	66344303	66344414	112	1	ENSG00000252126	ENST00000516317	-17070	NA	NA	NA
9	5621333	5621717	385	*	8.72	8.91	8.51	0.4	0.00185	0.148	Intron (ENST00000661858/ENSG00000286162, intron 1 of 2)	454	5577021	5628981	51961	2	ENSG00000286162	ENST00000650674	7264	NA	NA	NA
1	21801076	21801556	481	*	7.82	8.08	7.51	0.57	0.00185	0.148	Distal Intergenic	446	21812265	21825225	12961	1	ENSG00000187942	ENST00000344642	-10709	401944	LDLRAD2	low density lipoprotein receptor class A domain containing 2
17	9239726	9240825	1100	*	10.48	10.6	10.34	0.26	0.00185	0.148	3' UTR	462	9244666	9244897	232	2	ENSG00000273816	ENST00000614522	4072	NA	NA	NA
6	44072765	44073665	901	*	9.9	10.03	9.75	0.28	0.00185	0.148	Promoter (<=1kb)	451	44073913	44077952	4040	1	ENSG00000231881	ENST00000455005	-248	NA	NA	NA
13	27953373	27954815	1443	*	10.17	10.03	10.29	-0.27	0.00186	0.148	Promoter (<=1kb)	458	27953526	27955370	1845	1	ENSG00000260704	ENST00000567234	0	100132234	LINC00543	long intergenic non-protein coding RNA 543
17	2049477	2050939	1463	*	10.93	11.05	10.8	0.25	0.00187	0.148	Promoter (<=1kb)	462	2050271	2050380	110	2	ENSG00000267195	ENST00000586026	0	406994	MIR212	microRNA 212
7	5641898	5642424	527	*	8.55	8.76	8.32	0.44	0.00187	0.149	Intron (ENST00000389902/ENSG00000011275, intron 14 of 16)	452	5622927	5650015	27089	2	ENSG00000011275	ENST00000469375	7591	54476	RNF216	ring finger protein 216
5	12570309	12571077	769	*	8.06	8.29	7.79	0.51	0.0019	0.15	Intron (ENST00000502209/ENSG00000248783, intron 2 of 2)	450	12553890	12574637	20748	2	ENSG00000248783	ENST00000502209	3560	NA	NA	NA
5	17486785	17487571	787	*	8.78	8.97	8.57	0.4	0.0019	0.15	Exon (ENST00000638486/ENSG00000249662, exon 4 of 4)	450	17490967	17492076	1110	2	ENSG00000268799	ENST00000600799	4505	340096	H3Y2	H3.Y histone 2
21	41952992	41954595	1604	*	10.82	10.94	10.69	0.25	0.00191	0.15	Promoter (<=1kb)	466	41885112	41954018	68907	2	ENSG00000157617	ENST00000380486	0	25966	C2CD2	C2 calcium dependent domain containing 2
20	43914344	43915495	1152	*	9.91	10.05	9.76	0.28	0.00191	0.15	Promoter (<=1kb)	465	43914852	44069616	154765	1	ENSG00000124191	ENST00000341197	0	84969	TOX2	TOX high mobility group box family member 2
2	32038933	32040304	1372	*	10.78	10.66	10.89	-0.23	0.00191	0.15	Promoter (<=1kb)	447	32011886	32039754	27869	2	ENSG00000162961	ENST00000452582	0	84661	DPY30	dpy-30 histone methyltransferase complex regulatory subunit
2	59295790	59296771	982	*	9.78	9.62	9.93	-0.3	0.00191	0.15	Intron (ENST00000606382/ENSG00000271955, intron 3 of 3)	447	59238716	59253572	14857	2	ENSG00000233891	ENST00000668455	-42218	NA	NA	NA
15	39194416	39194959	544	*	10.09	9.95	10.22	-0.27	0.00192	0.151	Promoter (<=1kb)	460	39188438	39194309	5872	2	ENSG00000259345	ENST00000560743	-107	NA	NA	NA
22	46367121	46368232	1112	*	10.21	10.08	10.34	-0.26	0.00192	0.151	Promoter (<=1kb)	467	46365225	46366549	1325	2	ENSG00000075275	ENST00000674423	-572	9620	CELSR1	cadherin EGF LAG seven-pass G-type receptor 1
12	110123801	110125057	1257	*	10.86	10.97	10.74	0.23	0.00193	0.151	Promoter (<=1kb)	457	110124335	110169182	44848	1	ENSG00000122970	ENST00000361948	0	28981	IFT81	intraflagellar transport 81
4	165378638	165379722	1085	*	10.67	10.54	10.79	-0.25	0.00193	0.151	Promoter (<=1kb)	449	165379008	165498547	119540	1	ENSG00000109472	ENST00000402744	0	1363	CPE	carboxypeptidase E
9	109497466	109498775	1310	*	9.56	9.73	9.36	0.36	0.00195	0.152	Promoter (<=1kb)	454	109375694	109498313	122620	2	ENSG00000070159	ENST00000262539	0	5774	PTPN3	protein tyrosine phosphatase non-receptor type 3
8	75004050	75004613	564	*	9.54	9.69	9.37	0.31	0.00195	0.152	Intron (ENST00000262207/ENSG00000121005, intron 2 of 14)	453	75000174	75032841	32668	1	ENSG00000121005	ENST00000517786	3876	83690	CRISPLD1	cysteine rich secretory protein LCCL domain containing 1
6	125362878	125364194	1317	*	11.78	11.68	11.87	-0.19	0.00196	0.153	Distal Intergenic	451	125297487	125302078	4592	2	ENSG00000111906	ENST00000608284	-60800	51020	HDDC2	HD domain containing 2
9	4235543	4236726	1184	*	9.12	9.29	8.93	0.36	0.00196	0.153	Intron (ENST00000381971/ENSG00000107249, intron 2 of 10)	454	4118745	4298496	179752	2	ENSG00000107249	ENST00000478844	61770	169792	GLIS3	GLIS family zinc finger 3
1	221987739	221988414	676	*	7.88	8.12	7.59	0.54	0.00196	0.153	Distal Intergenic	446	221913648	221978523	64876	2	ENSG00000238042	ENST00000412445	-9216	105372950	LINC02257	long intergenic non-protein coding RNA 2257
3	124407265	124407829	565	*	8.32	8.53	8.08	0.45	0.00196	0.153	Promoter (<=1kb)	448	124407691	124407783	93	1	ENSG00000252751	ENST00000516942	0	NA	NA	NA
5	29614125	29614970	846	*	9.36	9.52	9.18	0.34	0.00197	0.153	Distal Intergenic	450	29600676	29600868	193	1	ENSG00000248418	ENST00000507979	13449	NA	NA	NA
5	178145733	178146750	1018	*	9.45	9.28	9.61	-0.33	0.00197	0.153	Promoter (<=1kb)	450	178145970	178148540	2571	1	ENSG00000145916	ENST00000507937	0	64777	RMND5B	required for meiotic nuclear division 5 homolog B
1	225809700	225810759	1060	*	11.27	11.4	11.12	0.27	0.00197	0.153	Promoter (<=1kb)	446	225810092	225838773	28682	1	ENSG00000143819	ENST00000445856	0	2052	EPHX1	epoxide hydrolase 1
4	8267085	8267699	615	*	9.08	8.89	9.25	-0.37	0.00197	0.153	Promoter (2-3kb)	449	8269754	8307098	37345	1	ENSG00000170801	ENST00000307358	-2055	94031	HTRA3	HtrA serine peptidase 3
20	52973084	52973877	794	*	10.01	9.86	10.14	-0.27	0.00198	0.153	Promoter (<=1kb)	465	52972358	53495330	522973	1	ENSG00000182463	ENST00000371497	726	128553	TSHZ2	teashirt zinc finger homeobox 2
7	149064910	149066200	1291	*	11.05	10.94	11.16	-0.22	0.00198	0.153	Distal Intergenic	452	149053961	149054173	213	1	ENSG00000234565	ENST00000415962	10949	NA	NA	NA
5	17154575	17154999	425	*	8.6	8.8	8.37	0.44	0.00198	0.153	Promoter (2-3kb)	450	17156971	17157071	101	2	ENSG00000251990	ENST00000516181	2072	NA	NA	NA
15	70289182	70290248	1067	*	11.62	11.52	11.72	-0.2	0.00199	0.153	Distal Intergenic	460	70321576	70326742	5167	1	ENSG00000259503	ENST00000558226	-31328	NA	NA	NA
4	36362863	36363619	757	*	9.2	9.36	9.02	0.34	0.00199	0.153	Intron (ENST00000504344/ENSG00000251438, intron 1 of 2)	449	36311190	36392410	81221	2	ENSG00000251438	ENST00000504344	28791	NA	NA	NA
7	82595204	82596043	840	*	9.18	9.35	9	0.34	0.00199	0.153	Distal Intergenic	452	82589848	82590691	844	2	ENSG00000213530	ENST00000320415	-4513	NA	NA	NA
13	95319475	95320367	893	*	9.21	9.37	9.03	0.35	0.00199	0.153	Distal Intergenic	458	95310830	95310955	126	2	ENSG00000223298	ENST00000411366	-8520	NA	NA	NA
4	141046194	141046738	545	*	7.64	7.9	7.33	0.57	0.002	0.153	Intron (ENST00000515673/ENSG00000170153, intron 1 of 6)	449	140944549	140967870	23322	2	ENSG00000170153	ENST00000515057	-78324	57484	RNF150	ring finger protein 150
13	80342603	80343184	582	*	10.06	9.91	10.2	-0.29	0.002	0.153	Promoter (1-2kb)	458	80335976	80341126	5151	2	ENSG00000136158	ENST00000377104	-1477	10253	SPRY2	sprouty RTK signaling antagonist 2
7	6306240	6306934	695	*	9.7	9.84	9.54	0.3	0.002	0.153	Distal Intergenic	452	6330795	6338693	7899	2	ENSG00000178397	ENST00000524898	31759	84792	FAM220A	family with sequence similarity 220 member A
2	178193693	178195613	1921	*	11.84	11.73	11.94	-0.21	0.002	0.153	Promoter (<=1kb)	447	178194481	178395772	201292	1	ENSG00000079156	ENST00000392505	0	114880	OSBPL6	oxysterol binding protein like 6
2	96116422	96117488	1067	*	9.99	9.83	10.14	-0.3	0.00201	0.153	Promoter (<=1kb)	447	96112876	96116571	3696	2	ENSG00000274286	ENST00000620793	0	151	ADRA2B	adrenoceptor alpha 2B
3	90010007	90010841	835	*	9.25	9.4	9.07	0.34	0.00201	0.153	Distal Intergenic	448	90030284	90030495	212	1	ENSG00000212598	ENST00000391296	-19443	NA	NA	NA
9	87662801	87663422	622	*	8.84	8.63	9.02	-0.39	0.00201	0.153	Intron (ENST00000358077/ENSG00000196730, intron 18 of 25)	454	87668453	87681522	13070	1	ENSG00000196730	ENST00000497743	-5031	1612	DAPK1	death associated protein kinase 1
8	94224494	94225110	617	*	8.48	8.68	8.24	0.44	0.00202	0.153	Distal Intergenic	453	94128240	94217303	89064	2	ENSG00000079112	ENST00000450165	-7191	1015	CDH17	cadherin 17
10	3740117	3740916	800	*	8.09	8.32	7.83	0.5	0.00203	0.154	Distal Intergenic	455	3748966	3763712	14747	1	ENSG00000229672	ENST00000661014	-8050	NA	NA	NA
2	220779846	220780355	510	*	8.36	8.57	8.12	0.45	0.00204	0.155	Intron (ENST00000658049/ENSG00000224819, intron 1 of 6)	447	220776818	220855873	79056	1	ENSG00000224819	ENST00000658049	3028	NA	NA	NA
4	93317190	93317935	746	*	8.51	8.71	8.28	0.43	0.00204	0.155	Promoter (1-2kb)	449	93318623	93319786	1164	2	ENSG00000250908	ENST00000505498	1851	NA	NA	NA
7	120402197	120403330	1134	*	9.23	9.41	9.03	0.38	0.00205	0.155	Intron (ENST00000331113/ENSG00000184408, intron 1 of 5)	452	120273175	120750337	477163	1	ENSG00000184408	ENST00000331113	129022	3751	KCND2	potassium voltage-gated channel subfamily D member 2
8	13406163	13407324	1162	*	9.81	9.95	9.66	0.29	0.00205	0.155	Intron (ENST00000276297/ENSG00000164741, intron 2 of 17)	453	13353401	13353530	130	2	ENSG00000253257	ENST00000523876	-52633	NA	NA	NA
10	79407792	79408458	667	*	8.64	8.41	8.83	-0.43	0.00205	0.155	Intron (ENST00000438554/ENSG00000235426, intron 1 of 1)	455	79382328	79409274	26947	1	ENSG00000235426	ENST00000438554	25464	NA	NA	NA
8	97117569	97118143	575	*	8.57	8.77	8.35	0.41	0.00206	0.155	Intron (ENST00000220763/ENSG00000104324, intron 7 of 7)	453	97132835	97133379	545	2	ENSG00000272249	ENST00000606010	15236	NA	NA	NA
17	76506171	76506966	796	*	9.55	9.35	9.72	-0.37	0.00206	0.155	Distal Intergenic	462	76471069	76501790	30722	2	ENSG00000129667	ENST00000591885	-4381	79651	RHBDF2	rhomboid 5 homolog 2
2	197179651	197180600	950	*	11.45	11.33	11.55	-0.22	0.00206	0.155	Intron (ENST00000282272/ENSG00000065413, intron 2 of 27)	447	197197991	197199273	1283	1	ENSG00000231621	ENST00000449346	-17391	101927596	ANKRD44-AS1	ANKRD44 antisense RNA 1
12	131830163	131831490	1328	*	11.36	11.26	11.46	-0.2	0.00207	0.155	Promoter (1-2kb)	457	131828540	131840747	12208	1	ENSG00000198598	ENST00000545790	1623	4326	MMP17	matrix metallopeptidase 17
7	117600855	117601345	491	*	7.67	7.92	7.36	0.56	0.00207	0.155	Intron (ENST00000648260/ENSG00000001626, intron 10 of 16)	452	117592518	117668562	76045	1	ENSG00000001626	ENST00000647720	8337	1080	CFTR	CF transmembrane conductance regulator
X	95840390	95841124	735	*	8.65	8.84	8.43	0.41	0.00207	0.155	Distal Intergenic	468	95720243	95721144	902	1	ENSG00000270583	ENST00000605604	120147	NA	NA	NA
5	10018666	10019216	551	*	8.22	8.43	7.96	0.48	0.00208	0.155	Distal Intergenic	450	10057502	10057807	306	1	ENSG00000279011	ENST00000623143	-38286	NA	NA	NA
3	129045501	129046811	1311	*	10.05	9.91	10.18	-0.27	0.00208	0.155	Promoter (<=1kb)	448	129045763	129046921	1159	1	ENSG00000249505	ENST00000510422	0	NA	NA	NA
4	140153943	140154577	635	*	9.84	9.67	9.99	-0.32	0.00208	0.155	Promoter (<=1kb)	449	139716753	140154184	437432	2	ENSG00000196782	ENST00000509479	0	55534	MAML3	mastermind like transcriptional coactivator 3
5	146877762	146879151	1390	*	11.11	11	11.22	-0.23	0.00209	0.155	Promoter (<=1kb)	450	146581146	146878642	297497	2	ENSG00000156475	ENST00000394409	0	5521	PPP2R2B	protein phosphatase 2 regulatory subunit Bbeta
15	68431037	68432496	1460	*	11.53	11.41	11.65	-0.24	0.00209	0.155	Promoter (<=1kb)	460	68296532	68432163	135632	2	ENSG00000137809	ENST00000315757	0	22801	ITGA11	integrin subunit alpha 11
15	74373450	74374964	1515	*	11.7	11.6	11.8	-0.2	0.0021	0.155	Promoter (<=1kb)	460	74374678	74375511	834	1	ENSG00000274937	ENST00000611178	0	NA	NA	NA
3	11060594	11061472	879	*	9.65	9.48	9.8	-0.32	0.0021	0.155	Promoter (<=1kb)	448	11060973	11091548	30576	1	ENSG00000287964	ENST00000657204	0	NA	NA	NA
5	16980670	16981427	758	*	9.1	9.26	8.91	0.36	0.00211	0.156	Distal Intergenic	450	16941843	16941951	109	2	ENSG00000201436	ENST00000364566	-38719	NA	NA	NA
10	31242485	31243430	946	*	8.77	8.95	8.56	0.4	0.00211	0.156	Intron (ENST00000669722/ENSG00000272381, intron 2 of 3)	455	31259599	31259704	106	1	ENSG00000252479	ENST00000516670	-16169	NA	NA	NA
2	38075785	38077558	1774	*	12.44	12.34	12.53	-0.19	0.00212	0.156	Promoter (<=1kb)	447	38067509	38076151	8643	2	ENSG00000138061	ENST00000610745	0	1545	CYP1B1	cytochrome P450 family 1 subfamily B member 1
3	48548743	48549374	632	*	9.13	8.93	9.29	-0.36	0.00212	0.156	Promoter (<=1kb)	448	48536445	48549895	13451	2	ENSG00000114268	ENST00000468162	521	5210	PFKFB4	6-phosphofructo-2-kinase/fructose-2,6-biphosphatase 4
12	25455558	25456105	548	*	8.73	8.92	8.52	0.4	0.00212	0.156	Intron (ENST00000543629/ENSG00000152936, intron 4 of 4)	457	25440875	25441052	178	2	ENSG00000255988	ENST00000545422	-14506	NA	NA	NA
5	52988795	52990162	1368	*	11.66	11.55	11.77	-0.23	0.00212	0.156	Promoter (<=1kb)	450	52989340	53090834	101495	1	ENSG00000164171	ENST00000503810	0	3673	ITGA2	integrin subunit alpha 2
7	3436657	3437207	551	*	9.8	9.94	9.65	0.29	0.00212	0.156	Intron (ENST00000404826/ENSG00000146555, intron 1 of 44)	452	3338126	3338601	476	1	ENSG00000224593	ENST00000430569	98531	NA	NA	NA
6	144007724	144008711	988	*	10.74	10.61	10.86	-0.26	0.00213	0.156	Promoter (<=1kb)	451	143940300	144008259	67960	2	ENSG00000118495	ENST00000649307	0	5325	PLAGL1	PLAG1 like zinc finger 1
18	35076261	35076980	720	*	8.14	8.36	7.88	0.48	0.00213	0.156	Intron (ENST00000591734/ENSG00000166974, intron 3 of 5)	463	35082009	35082242	234	1	ENSG00000280096	ENST00000624092	-5029	NA	NA	NA
12	40054529	40055139	611	*	8.14	8.37	7.88	0.48	0.00213	0.156	Intron (ENST00000280871/ENSG00000151229, intron 1 of 9)	457	40068243	40068590	348	2	ENSG00000229014	ENST00000418873	13451	NA	NA	NA
2	1593506	1594585	1080	*	11.34	11.23	11.44	-0.21	0.00213	0.156	Intron (ENST00000438247/ENSG00000228613, intron 2 of 2)	447	1366234	1580747	214514	2	ENSG00000231482	ENST00000650512	-12759	NA	NA	NA
16	787821	789158	1338	*	11.68	11.8	11.55	0.25	0.00214	0.156	Promoter (<=1kb)	461	784974	787981	3008	2	ENSG00000007376	ENST00000561734	0	113000	RPUSD1	RNA pseudouridine synthase domain containing 1
16	48462051	48462659	609	*	8.38	8.59	8.13	0.47	0.00214	0.156	Distal Intergenic	461	48470953	48471133	181	2	ENSG00000260688	ENST00000561492	8474	NA	NA	NA
17	3737527	3738347	821	*	9.19	9	9.36	-0.35	0.00214	0.156	Promoter (<=1kb)	462	3724318	3738953	14636	2	ENSG00000083457	ENST00000571185	606	3682	ITGAE	integrin subunit alpha E
1	153677685	153679667	1983	*	11.74	11.63	11.84	-0.21	0.00214	0.156	Promoter (<=1kb)	446	153678688	153693992	15305	1	ENSG00000169418	ENST00000368680	0	4881	NPR1	natriuretic peptide receptor 1
7	50792379	50794020	1642	*	11	11.12	10.86	0.26	0.00214	0.156	Promoter (<=1kb)	452	50590063	50793462	203400	2	ENSG00000106070	ENST00000335866	0	2887	GRB10	growth factor receptor bound protein 10
22	29732910	29734341	1432	*	11.81	11.71	11.91	-0.19	0.00216	0.156	Intron (ENST00000344318/ENSG00000100319, intron 5 of 5)	467	29720003	29731833	11831	1	ENSG00000100314	ENST00000216144	12907	164633	CABP7	calcium binding protein 7
9	27181331	27181816	486	*	9.66	9.81	9.5	0.31	0.00216	0.156	Intron (ENST00000519097/ENSG00000120156, intron 5 of 20)	454	27198287	27198401	115	1	ENSG00000223162	ENST00000411230	-16471	NA	NA	NA
18	9814320	9814860	541	*	7.86	8.11	7.54	0.57	0.00218	0.157	Promoter (<=1kb)	463	9814654	9845692	31039	1	ENSG00000168461	ENST00000577796	0	11031	RAB31	RAB31, member RAS oncogene family
5	17180881	17181760	880	*	10.8	10.91	10.69	0.23	0.00218	0.157	Intron (ENST00000606445/ENSG00000176788, intron 2 of 3)	450	17202274	17203145	872	1	ENSG00000250816	ENST00000514188	-20514	NA	NA	NA
5	20112842	20113936	1095	*	10.67	10.79	10.55	0.24	0.00218	0.157	Intron (ENST00000507958/ENSG00000145526, intron 2 of 14)	450	20158662	20158956	295	2	ENSG00000248766	ENST00000514549	45020	NA	NA	NA
7	102512269	102512919	651	*	7.82	8.07	7.53	0.54	0.00218	0.157	Intron (ENST00000465829/ENSG00000170667, intron 1 of 20)	452	102483562	102517755	34194	2	ENSG00000170667	ENST00000306682	4836	100271927	RASA4B	RAS p21 protein activator 4B
19	35267927	35268269	343	*	8.69	8.87	8.47	0.4	0.00218	0.157	Promoter (<=1kb)	464	35268962	35279821	10860	1	ENSG00000105698	ENST00000222305	-693	7392	USF2	upstream transcription factor 2, c-fos interacting
22	27438145	27439119	975	*	9.96	9.82	10.09	-0.27	0.00218	0.157	Promoter (1-2kb)	467	27436292	27441774	5483	1	ENSG00000287034	ENST00000654206	1853	105372980	LOC105372980	uncharacterized LOC105372980
3	77038420	77040301	1882	*	10.81	10.69	10.91	-0.22	0.00219	0.157	Promoter (<=1kb)	448	77039886	77649964	610079	1	ENSG00000185008	ENST00000461745	0	6092	ROBO2	roundabout guidance receptor 2
5	15080241	15080753	513	*	9.47	9.62	9.31	0.32	0.00219	0.157	Distal Intergenic	450	15110786	15110920	135	2	ENSG00000202269	ENST00000365399	30167	NA	NA	NA
18	63788482	63789021	540	*	8.36	8.58	8.11	0.47	0.00219	0.157	Intron (ENST00000425392/ENSG00000166396, intron 2 of 4)	463	63777977	63796313	18337	1	ENSG00000166396	ENST00000431370	10505	8710	SERPINB7	serpin family B member 7
6	160991164	160992740	1577	*	11.31	11.19	11.41	-0.22	0.00219	0.157	Promoter (<=1kb)	451	160991727	161117385	125659	1	ENSG00000085511	ENST00000366919	0	4216	MAP3K4	mitogen-activated protein kinase kinase kinase 4
13	101837850	101838800	951	*	7.94	8.17	7.66	0.52	0.00219	0.157	Intron (ENST00000376143/ENSG00000102466, intron 3 of 4)	458	101801878	101802488	611	1	ENSG00000215399	ENST00000400214	35972	NA	NA	NA
8	58641444	58642738	1295	*	8.92	9.1	8.71	0.39	0.0022	0.157	Intron (ENST00000038176/ENSG00000035681, intron 2 of 30)	453	58631428	58659214	27787	2	ENSG00000035681	ENST00000519871	16476	8439	NSMAF	neutral sphingomyelinase activation associated factor
5	103866323	103867004	682	*	8.23	8.45	7.98	0.47	0.0022	0.157	Distal Intergenic	450	103880891	103885865	4975	2	ENSG00000283462	ENST00000637363	18861	NA	NA	NA
17	50345561	50347094	1534	*	10.96	11.08	10.83	0.25	0.00221	0.157	Promoter (<=1kb)	462	50346126	50361185	15060	1	ENSG00000015532	ENST00000017003	0	64132	XYLT2	xylosyltransferase 2
5	75052439	75054101	1663	*	10.81	10.68	10.94	-0.26	0.00222	0.158	Promoter (<=1kb)	450	75025346	75052558	27213	2	ENSG00000176928	ENST00000652361	0	51301	GCNT4	glucosaminyl (N-acetyl) transferase 4
3	79842967	79843863	897	*	9.41	9.57	9.24	0.33	0.00222	0.158	Distal Intergenic	448	78597239	79767998	1170760	2	ENSG00000169855	ENST00000464233	-74969	6091	ROBO1	roundabout guidance receptor 1
1	63316783	63317948	1166	*	11.26	11.14	11.36	-0.22	0.00222	0.158	Promoter (<=1kb)	446	63159087	63317222	158136	2	ENSG00000224209	ENST00000635458	0	199899	LINC00466	long intergenic non-protein coding RNA 466
2	190534079	190535234	1156	*	11.43	11.31	11.54	-0.24	0.00223	0.158	Promoter (<=1kb)	447	190504338	190534722	30385	2	ENSG00000189362	ENST00000409150	0	100131211	NEMP2	nuclear envelope integral membrane protein 2
19	9008422	9011057	2636	*	11.78	11.68	11.87	-0.2	0.00224	0.158	Distal Intergenic	464	9019344	9019984	641	1	ENSG00000267332	ENST00000586496	-8287	NA	NA	NA
5	38994243	38994693	451	*	8.47	8.68	8.21	0.48	0.00224	0.158	Intron (ENST00000357387/ENSG00000164327, intron 6 of 37)	450	38966815	38971961	5147	2	ENSG00000164327	ENST00000515846	-22282	253260	RICTOR	RPTOR independent companion of MTOR complex 2
10	35005747	35006460	714	*	9.29	9.45	9.12	0.33	0.00224	0.158	Downstream (2-3kb)	455	34973984	34975578	1595	1	ENSG00000283000	ENST00000635301	31763	NA	NA	NA
2	233867931	233868569	639	*	7.71	7.39	7.98	-0.59	0.00226	0.159	Promoter (<=1kb)	447	233865437	233868444	3008	2	ENSG00000224287	ENST00000438684	0	151507	MSL3P1	MSL complex subunit 3 pseudogene 1
17	42547932	42548996	1065	*	9.9	9.75	10.04	-0.29	0.00226	0.159	Promoter (1-2kb)	462	42546764	42548706	1943	1	ENSG00000108785	ENST00000590052	1168	NA	NA	NA
17	15944652	15946365	1714	*	11.58	11.48	11.68	-0.2	0.00227	0.16	Promoter (<=1kb)	462	15944917	15975746	30830	1	ENSG00000170425	ENST00000304222	0	136	ADORA2B	adenosine A2b receptor
15	73926126	73928201	2076	*	12.47	12.36	12.57	-0.22	0.00228	0.16	Promoter (<=1kb)	460	73926462	73952136	25675	1	ENSG00000129038	ENST00000261921	0	4016	LOXL1	lysyl oxidase like 1
17	50691678	50692274	597	*	9.8	9.65	9.93	-0.29	0.00228	0.16	Promoter (1-2kb)	462	50693448	50695449	2002	1	ENSG00000262967	ENST00000574246	-1174	NA	NA	NA
8	54457696	54460074	2379	*	11.02	10.91	11.12	-0.21	0.0023	0.162	Promoter (<=1kb)	453	54457935	54460892	2958	1	ENSG00000164736	ENST00000297316	0	64321	SOX17	SRY-box transcription factor 17
12	124684822	124685474	653	*	9.94	9.8	10.08	-0.28	0.00231	0.162	Distal Intergenic	457	124725524	124725934	411	1	ENSG00000279931	ENST00000624500	-40050	NA	NA	NA
7	116777443	116778327	885	*	10.18	10.31	10.03	0.27	0.00231	0.162	Exon (ENST00000318493/ENSG00000105976, exon 16 of 21)	452	116769666	116775072	5407	1	ENSG00000105976	ENST00000454623	7777	4233	MET	MET proto-oncogene, receptor tyrosine kinase
9	136840900	136841721	822	*	10.83	10.72	10.94	-0.22	0.00231	0.162	Promoter (2-3kb)	454	136844415	136848801	4387	1	ENSG00000232434	ENST00000436881	-2694	389813	AJM1	apical junction component 1 homolog
8	128282925	128283775	851	*	7.83	8.07	7.54	0.53	0.00232	0.162	Distal Intergenic	453	128323131	128388636	65506	1	ENSG00000286034	ENST00000652078	-39356	NA	NA	NA
9	38226421	38227874	1454	*	9.55	9.69	9.39	0.31	0.00232	0.162	Distal Intergenic	454	38147428	38147561	134	1	ENSG00000200026	ENST00000363156	78993	NA	NA	NA
12	69966252	69967328	1077	*	9.16	9.32	8.97	0.35	0.00232	0.162	Intron (ENST00000549419/ENSG00000257815, intron 2 of 2)	457	69946543	69947081	539	2	ENSG00000257241	ENST00000547547	-19171	NA	NA	NA
19	39078496	39079256	761	*	9.61	9.75	9.45	0.3	0.00232	0.162	Distal Intergenic	464	39083913	39111493	27581	1	ENSG00000183760	ENST00000601575	-4657	390928	ACP7	acid phosphatase 7, tartrate resistant (putative)
3	195546133	195546636	504	*	9.58	9.72	9.41	0.31	0.00232	0.162	Promoter (<=1kb)	448	195546404	195550581	4178	1	ENSG00000223711	ENST00000417011	0	NA	NA	NA
3	175386598	175387147	550	*	8.19	8.42	7.91	0.51	0.00233	0.162	Intron (ENST00000454872/ENSG00000177694, intron 5 of 13)	448	175397247	175397348	102	2	ENSG00000199792	ENST00000362922	10201	NA	NA	NA
5	181188824	181189613	790	*	11.05	10.93	11.15	-0.22	0.00235	0.163	Promoter (<=1kb)	450	181187455	181189453	1999	2	ENSG00000248473	ENST00000655600	0	102577426	LINC01962	long intergenic non-protein coding RNA 1962
5	26582349	26583121	773	*	8.91	9.1	8.69	0.4	0.00236	0.164	Distal Intergenic	450	26669346	26669736	391	1	ENSG00000230571	ENST00000413321	-86225	NA	NA	NA
1	1324270	1325783	1514	*	11.83	11.73	11.92	-0.2	0.00237	0.164	Promoter (<=1kb)	446	1311585	1324687	13103	2	ENSG00000127054	ENST00000540437	0	54973	INTS11	integrator complex subunit 11
3	79983024	79983828	805	*	8.16	8.38	7.9	0.48	0.00238	0.164	Distal Intergenic	448	79957566	79958142	577	2	ENSG00000243877	ENST00000490557	-24882	NA	NA	NA
1	204151620	204152791	1172	*	9.49	9.66	9.3	0.36	0.00238	0.164	Promoter (<=1kb)	446	204131062	204151894	20833	2	ENSG00000143845	ENST00000367201	0	55224	ETNK2	ethanolamine kinase 2
16	87316805	87318043	1239	*	11.64	11.54	11.73	-0.2	0.00238	0.164	Promoter (<=1kb)	461	87302801	87317420	14620	2	ENSG00000260456	ENST00000618367	0	100506581	C16orf95	chromosome 16 open reading frame 95
2	127422645	127423864	1220	*	10.87	10.75	10.98	-0.23	0.00239	0.164	Promoter (<=1kb)	447	127423288	127426526	3239	1	ENSG00000115718	ENST00000464089	0	5624	PROC	protein C, inactivator of coagulation factors Va and VIIIa
17	76641506	76642007	502	*	9.05	9.21	8.86	0.35	0.0024	0.164	Promoter (1-2kb)	462	76629395	76643660	14266	2	ENSG00000070526	ENST00000589813	1653	55808	ST6GALNAC1	ST6 N-acetylgalactosaminide alpha-2,6-sialyltransferase 1
14	54901798	54903398	1601	*	10.84	10.72	10.94	-0.22	0.00241	0.164	Promoter (<=1kb)	459	54842008	54902824	60817	2	ENSG00000131979	ENST00000395514	0	2643	GCH1	GTP cyclohydrolase 1
8	66438746	66439743	998	*	9.32	9.14	9.48	-0.34	0.00241	0.164	Promoter (<=1kb)	453	66439268	66444681	5414	1	ENSG00000147576	ENST00000518781	0	137872	ADHFE1	alcohol dehydrogenase iron containing 1
20	50761480	50762189	710	*	9.73	9.86	9.58	0.29	0.00241	0.164	Distal Intergenic	465	50731665	50756795	25131	1	ENSG00000124171	ENST00000396039	29815	84612	PARD6B	par-6 family cell polarity regulator beta
15	95684632	95685206	575	*	8.14	8.36	7.89	0.47	0.00241	0.164	Intron (ENST00000661571/ENSG00000275016, intron 1 of 2)	460	95638494	95716890	78397	1	ENSG00000275016	ENST00000611285	46138	NA	NA	NA
5	24065737	24066443	707	*	9.46	9.61	9.3	0.31	0.00241	0.164	Intron (ENST00000512559/ENSG00000248874, intron 4 of 4)	450	23994502	23994603	102	2	ENSG00000200600	ENST00000363730	-71134	NA	NA	NA
17	50930989	50931999	1011	*	11.12	10.99	11.24	-0.26	0.00241	0.164	Downstream (2-3kb)	462	50944104	50947827	3724	1	ENSG00000251665	ENST00000506394	-12105	NA	NA	NA
X	154428332	154429393	1062	*	11.05	10.93	11.16	-0.23	0.00241	0.164	Promoter (<=1kb)	468	154428633	154436516	7884	1	ENSG00000071553	ENST00000677342	0	537	ATP6AP1	ATPase H+ transporting accessory protein 1
17	81551507	81554169	2663	*	12.44	12.35	12.53	-0.18	0.00241	0.164	Promoter (<=1kb)	462	81539885	81552376	12492	2	ENSG00000185504	ENST00000443656	0	80233	FAAP100	FA core complex associated protein 100
9	17955222	17955983	762	*	8.1	8.32	7.83	0.49	0.00241	0.164	Intron (ENST00000636209/ENSG00000178031, intron 1 of 3)	454	17906563	18533292	626730	1	ENSG00000178031	ENST00000636209	48659	92949	ADAMTSL1	ADAMTS like 1
9	128927672	128928460	789	*	9.22	9.04	9.39	-0.36	0.00241	0.164	Promoter (<=1kb)	454	128927046	128940709	13664	1	ENSG00000175287	ENST00000424503	626	254295	PHYHD1	phytanoyl-CoA dioxygenase domain containing 1
20	48619262	48620837	1576	*	12.1	12.01	12.19	-0.19	0.00242	0.164	Distal Intergenic	465	48642113	48642738	626	2	ENSG00000124126	ENST00000496915	21901	57580	PREX1	phosphatidylinositol-3,4,5-trisphosphate dependent Rac exchange factor 1
7	27148013	27149186	1174	*	10.21	10.08	10.34	-0.26	0.00242	0.164	Promoter (<=1kb)	452	27145396	27147774	2379	2	ENSG00000106006	ENST00000222728	-239	3203	HOXA6	homeobox A6
15	85607565	85608232	668	*	7.79	8.05	7.49	0.56	0.00242	0.164	Intron (ENST00000559362/ENSG00000170776, intron 8 of 14)	460	85619696	85727414	107719	1	ENSG00000170776	ENST00000560676	-11464	11214	AKAP13	A-kinase anchoring protein 13
12	43847221	43848059	839	*	8.97	9.17	8.75	0.42	0.00243	0.165	Promoter (2-3kb)	457	43844851	44388035	543185	1	ENSG00000139173	ENST00000550495	2370	84216	TMEM117	transmembrane protein 117
8	37539562	37540170	609	*	8	7.73	8.23	-0.51	0.00244	0.165	Intron (ENST00000519738/ENSG00000253161, intron 1 of 5)	453	37475954	37554067	78114	2	ENSG00000253161	ENST00000517363	13897	NA	NA	NA
14	103110621	103111817	1197	*	10.95	10.84	11.05	-0.22	0.00244	0.165	Promoter (2-3kb)	459	103107622	103110559	2938	1	ENSG00000205436	ENST00000559693	2999	91828	EXOC3L4	exocyst complex component 3 like 4
22	49993124	49993879	756	*	9.49	9.32	9.64	-0.32	0.00244	0.165	Downstream (<1kb)	467	49994513	50008692	14180	2	ENSG00000188263	ENST00000341280	14813	400935	IL17REL	interleukin 17 receptor E like
12	111685218	111686567	1350	*	10.9	10.79	11.01	-0.22	0.00244	0.165	Promoter (<=1kb)	457	111642146	111685956	43811	2	ENSG00000089234	ENST00000419234	0	8315	BRAP	BRCA1 associated protein
2	232523505	232524532	1028	*	10.06	9.92	10.18	-0.26	0.00244	0.165	Promoter (1-2kb)	447	232522501	232523330	830	1	ENSG00000237412	ENST00000602410	1004	646960	PRSS56	serine protease 56
4	28228719	28229616	898	*	9.18	8.99	9.34	-0.35	0.00245	0.165	Promoter (2-3kb)	449	28225969	28288297	62329	1	ENSG00000286321	ENST00000668598	2750	NA	NA	NA
8	143384853	143385860	1008	*	11.27	11.16	11.37	-0.21	0.00246	0.165	Distal Intergenic	453	143379337	143382779	3443	1	ENSG00000158106	ENST00000522899	5516	114822	RHPN1	rhophilin Rho GTPase binding protein 1
1	31939575	31940287	713	*	11.11	11	11.21	-0.21	0.00246	0.165	Promoter (1-2kb)	446	31906421	31938368	31948	2	ENSG00000184007	ENST00000647444	-1207	8073	PTP4A2	protein tyrosine phosphatase 4A2
15	74995116	74995923	808	*	9.34	9.51	9.16	0.35	0.00246	0.165	Promoter (<=1kb)	460	74995542	75017925	22384	1	ENSG00000198794	ENST00000562327	0	192683	SCAMP5	secretory carrier membrane protein 5
13	68749406	68750224	819	*	8.61	8.81	8.37	0.44	0.00247	0.165	Distal Intergenic	458	68693804	68694081	278	2	ENSG00000243671	ENST00000463259	-55325	NA	NA	NA
2	10431796	10433204	1409	*	11.19	11.07	11.29	-0.22	0.00247	0.165	Distal Intergenic	447	10420021	10427000	6980	1	ENSG00000115756	ENST00000422133	11775	3241	HPCAL1	hippocalcin like 1
5	41788628	41789758	1131	*	11.1	11.2	10.98	0.22	0.00247	0.165	Intron (ENST00000196371/ENSG00000083720, intron 13 of 16)	450	41731581	41794135	62555	2	ENSG00000083720	ENST00000508557	4377	5019	OXCT1	3-oxoacid CoA-transferase 1
7	102432988	102434610	1623	*	10.86	10.98	10.73	0.25	0.0025	0.167	Promoter (<=1kb)	452	102433106	102439047	5942	1	ENSG00000160991	ENST00000482237	0	80228	ORAI2	ORAI calcium release-activated calcium modulator 2
2	157036656	157037448	793	*	8.69	8.88	8.47	0.41	0.0025	0.167	Promoter (2-3kb)	447	157033837	157049716	15880	1	ENSG00000286530	ENST00000653962	2819	NA	NA	NA
9	137028574	137029743	1170	*	11.32	11.21	11.42	-0.21	0.0025	0.167	Promoter (<=1kb)	454	137007234	137028922	21689	2	ENSG00000107331	ENST00000614293	0	20	ABCA2	ATP binding cassette subfamily A member 2
12	15962715	15963649	935	*	9.07	9.24	8.87	0.37	0.00251	0.167	Promoter (<=1kb)	457	15962752	16036813	74062	1	ENSG00000023697	ENST00000530274	0	51071	DERA	deoxyribose-phosphate aldolase
5	17189364	17189952	589	*	9.69	9.53	9.83	-0.3	0.00251	0.167	Intron (ENST00000606445/ENSG00000176788, intron 2 of 3)	450	17202274	17203145	872	1	ENSG00000250816	ENST00000514188	-12322	NA	NA	NA
4	118351889	118353548	1660	*	11.07	10.96	11.17	-0.21	0.00251	0.167	Promoter (<=1kb)	449	118280038	118353003	72966	2	ENSG00000164099	ENST00000296498	0	8492	PRSS12	serine protease 12
20	48827114	48828677	1564	*	11.17	11.29	11.04	0.25	0.00252	0.167	Promoter (<=1kb)	465	48624252	48827999	203748	2	ENSG00000124126	ENST00000371941	0	57580	PREX1	phosphatidylinositol-3,4,5-trisphosphate dependent Rac exchange factor 1
20	41482382	41483420	1039	*	9.02	9.19	8.82	0.37	0.00252	0.167	Promoter (1-2kb)	465	41473023	41484507	11485	2	ENSG00000124177	ENST00000476641	1087	84181	CHD6	chromodomain helicase DNA binding protein 6
3	152328843	152329244	402	*	8.64	8.84	8.41	0.43	0.00253	0.167	Intron (ENST00000282486/ENSG00000152601, intron 2 of 9)	448	152340527	152340904	378	2	ENSG00000221962	ENST00000408960	11660	645843	TMEM14EP	transmembrane protein 14E, pseudogene
12	131895715	131897011	1297	*	12.1	12.01	12.2	-0.19	0.00255	0.168	Promoter (<=1kb)	457	131896500	131898239	1740	1	ENSG00000279283	ENST00000624048	0	NA	NA	NA
3	83033082	83033804	723	*	8.51	8.71	8.27	0.44	0.00256	0.169	Distal Intergenic	448	82806515	82808021	1507	2	ENSG00000241095	ENST00000492267	-225061	NA	NA	NA
13	34265032	34266108	1077	*	8.93	9.11	8.74	0.37	0.00256	0.169	Promoter (2-3kb)	458	34262863	34263090	228	1	ENSG00000278477	ENST00000621360	2169	NA	NA	NA
1	205522303	205522838	536	*	9.63	9.44	9.79	-0.35	0.00257	0.169	Promoter (<=1kb)	446	205522429	205532785	10357	1	ENSG00000117266	ENST00000515494	0	5129	CDK18	cyclin dependent kinase 18
17	14302398	14302959	562	*	9.72	9.56	9.86	-0.29	0.00258	0.169	Promoter (<=1kb)	462	14303854	14305505	1652	1	ENSG00000266709	ENST00000583262	-895	84815	MGC12916	uncharacterized protein MGC12916
8	143982434	143982952	519	*	8.87	8.67	9.04	-0.37	0.00258	0.169	Promoter (1-2kb)	453	143977153	143984358	7206	2	ENSG00000178685	ENST00000526007	1406	84875	PARP10	poly(ADP-ribose) polymerase family member 10
14	100654612	100655181	570	*	8.94	8.75	9.11	-0.36	0.00258	0.169	Promoter (2-3kb)	459	100657250	100672775	15526	1	ENSG00000196273	ENST00000556697	-2069	283601	LINC00523	long intergenic non-protein coding RNA 523
9	122402202	122402962	761	*	9.79	9.93	9.63	0.3	0.00258	0.169	Promoter (<=1kb)	454	122400970	122402906	1937	2	ENSG00000233616	ENST00000439471	0	NA	NA	NA
12	75750700	75751336	637	*	8.06	8.31	7.75	0.56	0.0026	0.17	Intron (ENST00000552856/ENSG00000258077, intron 2 of 4)	457	75694010	75698816	4807	2	ENSG00000258088	ENST00000548702	-51884	NA	NA	NA
7	29723007	29724001	995	*	9.43	9.58	9.26	0.32	0.0026	0.17	Intron (ENST00000414296/ENSG00000227855, intron 15 of 18)	452	29598795	29685255	86461	2	ENSG00000225264	ENST00000442865	-37752	NA	NA	NA
2	111117002	111118285	1284	*	10.91	10.79	11.01	-0.22	0.0026	0.17	Promoter (<=1kb)	447	111112567	111116407	3841	2	ENSG00000204581	ENST00000670010	-595	400997	ACOXL-AS1	ACOXL antisense RNA 1
12	65648915	65649577	663	*	9.14	9.3	8.96	0.35	0.0026	0.17	Promoter (2-3kb)	457	65645992	65646462	471	2	ENSG00000213344	ENST00000393579	-2453	NA	NA	NA
2	200615139	200615611	473	*	8.54	8.73	8.32	0.41	0.0026	0.17	Intron (ENST00000374700/ENSG00000138356, intron 15 of 34)	447	200609243	200671136	61894	1	ENSG00000138356	ENST00000485106	5896	316	AOX1	aldehyde oxidase 1
16	71709221	71710079	859	*	9.27	9.43	9.09	0.34	0.00261	0.17	Intron (ENST00000568954/ENSG00000040199, intron 2 of 18)	461	71644928	71715529	70602	2	ENSG00000040199	ENST00000393524	5450	23035	PHLPP2	PH domain and leucine rich repeat protein phosphatase 2
6	37523988	37524965	978	*	8.64	8.83	8.42	0.41	0.00262	0.17	Intron (ENST00000570443/ENSG00000204110, intron 1 of 3)	451	37507348	37535616	28269	1	ENSG00000204110	ENST00000570443	16640	NA	NA	NA
8	91483837	91484602	766	*	9.15	9.31	8.97	0.34	0.00262	0.17	Distal Intergenic	453	91594965	91595241	277	1	ENSG00000200151	ENST00000363281	-110363	NA	NA	NA
21	37365661	37367195	1535	*	11.48	11.59	11.37	0.23	0.00263	0.17	Promoter (<=1kb)	466	37365790	37512531	146742	1	ENSG00000157540	ENST00000647425	0	1859	DYRK1A	dual specificity tyrosine phosphorylation regulated kinase 1A
1	201506533	201507584	1052	*	11.78	11.68	11.87	-0.19	0.00263	0.17	Promoter (<=1kb)	446	201483530	201507123	23594	2	ENSG00000159176	ENST00000340006	0	1465	CSRP1	cysteine and glycine rich protein 1
1	47388567	47389280	714	*	8.41	8.18	8.61	-0.43	0.00263	0.17	Intron (ENST00000420876/ENSG00000225762, intron 1 of 2)	446	47380928	47408477	27550	2	ENSG00000225762	ENST00000420876	19197	NA	NA	NA
12	132761981	132762574	594	*	10.32	10.44	10.18	0.26	0.00264	0.17	Promoter (<=1kb)	457	132725503	132761832	36330	2	ENSG00000176915	ENST00000357997	-149	23141	ANKLE2	ankyrin repeat and LEM domain containing 2
1	12208539	12209438	900	*	9.35	9.17	9.5	-0.33	0.00264	0.17	3' UTR	446	12220794	12221109	316	2	ENSG00000225196	ENST00000453852	11671	NA	NA	NA
21	42414854	42415630	777	*	8.8	8.99	8.58	0.41	0.00264	0.17	Promoter (1-2kb)	466	42417497	42417593	97	2	ENSG00000252619	ENST00000516810	1963	NA	NA	NA
12	46455758	46456559	802	*	8.74	8.92	8.52	0.4	0.00264	0.17	Exon (ENST00000551503/ENSG00000257261, exon 4 of 4)	457	46412150	46485060	72911	1	ENSG00000257261	ENST00000657145	43608	NA	NA	NA
5	38549877	38550325	449	*	9.53	9.68	9.37	0.31	0.00264	0.17	Intron (ENST00000453190/ENSG00000113594, intron 1 of 19)	450	38527175	38556636	29462	2	ENSG00000113594	ENST00000506990	6311	3977	LIFR	LIF receptor subunit alpha
5	67267776	67269177	1402	*	11.39	11.28	11.5	-0.22	0.00264	0.17	Promoter (<=1kb)	450	67268022	67270182	2161	1	ENSG00000251206	ENST00000515077	0	NA	NA	NA
8	122767048	122767500	453	*	7.67	7.92	7.37	0.55	0.00264	0.17	Promoter (1-2kb)	453	122769274	122770150	877	1	ENSG00000235165	ENST00000442838	-1774	NA	NA	NA
6	129889498	129890010	513	*	7.98	8.2	7.71	0.5	0.00265	0.17	Distal Intergenic	451	129831322	129861547	30226	2	ENSG00000203756	ENST00000438392	-27951	253582	TMEM244	transmembrane protein 244
2	200509170	200510546	1377	*	11.34	11.22	11.44	-0.22	0.00266	0.17	Promoter (<=1kb)	447	200488958	200510068	21111	2	ENSG00000155729	ENST00000359878	0	130535	KCTD18	potassium channel tetramerization domain containing 18
17	39547622	39548264	643	*	8.54	8.31	8.75	-0.44	0.00266	0.17	Promoter (<=1kb)	462	39547821	39564907	17087	1	ENSG00000167258	ENST00000559545	0	51755	CDK12	cyclin dependent kinase 12
13	63972063	63973002	940	*	8.29	8.51	8.01	0.5	0.00266	0.17	Intron (ENST00000650541/ENSG00000227674, intron 5 of 6)	458	63975451	63976422	972	2	ENSG00000237849	ENST00000431953	3420	NA	NA	NA
20	1225330	1226780	1451	*	9.93	10.07	9.78	0.29	0.00267	0.17	Promoter (<=1kb)	465	1226056	1296421	70366	1	ENSG00000244588	ENST00000402452	0	642636	RAD21L1	RAD21 cohesin complex component like 1
4	100461702	100462661	960	*	10.14	10.27	10	0.27	0.00267	0.17	Intron (ENST00000652064/ENSG00000286150, intron 1 of 1)	449	100397794	100475077	77284	2	ENSG00000164035	ENST00000506300	12416	51705	EMCN	endomucin
5	13985487	13986439	953	*	11.07	11.17	10.96	0.21	0.00267	0.17	Distal Intergenic	450	13690331	13944543	254213	2	ENSG00000039139	ENST00000265104	-40944	1767	DNAH5	dynein axonemal heavy chain 5
5	39772245	39772664	420	*	8.01	8.23	7.74	0.49	0.00267	0.17	Distal Intergenic	450	39718984	39721513	2530	2	ENSG00000250492	ENST00000504674	-50732	NA	NA	NA
19	39341202	39342594	1393	*	11.65	11.75	11.55	0.2	0.00268	0.17	Promoter (<=1kb)	464	39328362	39342372	14011	2	ENSG00000130755	ENST00000600322	0	9535	GMFG	glia maturation factor gamma
19	18635999	18637227	1229	*	11.9	12.01	11.77	0.24	0.00268	0.17	Promoter (<=1kb)	464	18637025	18667626	30602	1	ENSG00000167487	ENST00000595182	0	55295	KLHL26	kelch like family member 26
1	37534276	37534918	643	*	8.83	9.01	8.62	0.39	0.00268	0.17	3' UTR	446	37536690	37541594	4905	2	ENSG00000163877	ENST00000638725	6676	79753	SNIP1	Smad nuclear interacting protein 1
10	103168310	103168962	653	*	8.04	8.26	7.77	0.49	0.00269	0.171	Intron (ENST00000675164/ENSG00000076685, intron 3 of 19)	455	103175554	103176094	541	1	ENSG00000213277	ENST00000412473	-6592	NA	NA	NA
15	45919683	45920549	867	*	9.47	9.62	9.3	0.32	0.0027	0.171	Intron (ENST00000559600/ENSG00000259200, intron 2 of 4)	460	45879637	45928936	49300	1	ENSG00000259200	ENST00000655516	40046	105370802	LOC105370802	uncharacterized LOC105370802
13	42486528	42487506	979	*	10.61	10.72	10.48	0.25	0.0027	0.171	Distal Intergenic	458	42424892	42485956	61065	1	ENSG00000283554	ENST00000637043	61636	105370177	LINC02341	long intergenic non-protein coding RNA 2341
13	104571197	104572032	836	*	10.14	10	10.26	-0.26	0.0027	0.171	Distal Intergenic	458	104814327	104815069	743	1	ENSG00000225823	ENST00000455851	-242295	NA	NA	NA
12	15700550	15701119	570	*	8.73	8.91	8.52	0.39	0.00271	0.171	Intron (ENST00000281172/ENSG00000151491, intron 1 of 20)	457	15620983	15712993	92011	2	ENSG00000151491	ENST00000543612	11874	2059	EPS8	epidermal growth factor receptor pathway substrate 8
19	3618268	3618926	659	*	8.64	8.42	8.84	-0.41	0.00271	0.171	Promoter (<=1kb)	464	3613507	3619166	5660	2	ENSG00000105298	ENST00000588749	240	58509	CACTIN	cactin, spliceosome C complex subunit
2	37782659	37783280	622	*	9.35	9.18	9.51	-0.33	0.00272	0.171	Distal Intergenic	447	37816915	37817961	1047	1	ENSG00000225402	ENST00000456500	-33635	NA	NA	NA
19	4567351	4568214	864	*	9.3	9.13	9.45	-0.33	0.00272	0.171	Intron (ENST00000676793/ENSG00000167680, intron 1 of 16)	464	4542593	4559684	17092	2	ENSG00000167680	ENST00000586582	-7667	10501	SEMA6B	semaphorin 6B
5	107217647	107219328	1682	*	9.47	9.62	9.31	0.31	0.00272	0.171	Distal Intergenic	450	107195156	107195332	177	1	ENSG00000250273	ENST00000512850	22491	NA	NA	NA
2	84970301	84972302	2002	*	11.37	11.48	11.25	0.23	0.00272	0.171	Promoter (<=1kb)	447	84971093	85028056	56964	1	ENSG00000176407	ENST00000456682	0	56888	KCMF1	potassium channel modulatory factor 1
8	22358602	22359095	494	*	8.07	8.29	7.81	0.48	0.00272	0.171	Distal Intergenic	453	22352799	22356088	3290	1	ENSG00000197181	ENST00000519884	5803	55124	PIWIL2	piwi like RNA-mediated gene silencing 2
1	172917887	172918473	587	*	9.98	10.11	9.83	0.27	0.00273	0.171	Intron (ENST00000432694/ENSG00000224228, intron 1 of 4)	446	172906900	172907684	785	1	ENSG00000224000	ENST00000452366	10987	NA	NA	NA
16	58459362	58459720	359	*	7.82	8.06	7.54	0.52	0.00273	0.171	Intron (ENST00000561906/ENSG00000260186, intron 2 of 3)	461	58462846	58504649	41804	1	ENSG00000103034	ENST00000568999	-3126	65009	NDRG4	NDRG family member 4
12	67705665	67706476	812	*	9.37	9.52	9.19	0.33	0.00274	0.171	Downstream (2-3kb)	457	67709047	67729475	20429	2	ENSG00000255970	ENST00000542219	22999	101927901	LINC02421	long intergenic non-protein coding RNA 2421
17	79125147	79126099	953	*	9.12	8.93	9.28	-0.36	0.00276	0.172	Intron (ENST00000583458/ENSG00000167281, intron 3 of 13)	462	79132722	79136402	3681	1	ENSG00000266711	ENST00000583980	-6623	NA	NA	NA
2	183078304	183079440	1137	*	10.56	10.44	10.67	-0.23	0.00277	0.173	Promoter (<=1kb)	447	183078559	183095899	17341	1	ENSG00000162999	ENST00000342619	0	142679	DUSP19	dual specificity phosphatase 19
17	76382975	76386350	3376	*	12.75	12.65	12.83	-0.18	0.00278	0.173	Promoter (<=1kb)	462	76330552	76384521	53970	2	ENSG00000161542	ENST00000423915	0	5635	PRPSAP1	phosphoribosyl pyrophosphate synthetase associated protein 1
6	21586922	21589563	2642	*	11.82	11.72	11.91	-0.19	0.00278	0.173	Intron (ENST00000637901/ENSG00000283480, intron 1 of 2)	451	21593751	21598619	4869	1	ENSG00000124766	ENST00000244745	-4188	6659	SOX4	SRY-box transcription factor 4
1	148371428	148372079	652	*	8.83	8.61	9.02	-0.42	0.00278	0.173	Intron (ENST00000638958/ENSG00000274020, intron 1 of 6)	446	148362370	148362533	164	2	ENSG00000207340	ENST00000384610	-8895	101954273	RNVU1-1	RNA, variant U1 small nuclear 1
12	54370156	54370804	649	*	10.48	10.35	10.61	-0.26	0.00279	0.174	3' UTR	457	54362447	54364487	2041	2	ENSG00000139572	ENST00000551809	-5669	53831	GPR84	G protein-coupled receptor 84
1	205528617	205529486	870	*	9.54	9.37	9.68	-0.31	0.0028	0.174	Promoter (<=1kb)	446	205529194	205531404	2211	1	ENSG00000117266	ENST00000512008	0	5129	CDK18	cyclin dependent kinase 18
1	238658683	238659239	557	*	8.39	8.59	8.15	0.44	0.00281	0.174	Distal Intergenic	446	238777049	238779200	2152	2	ENSG00000224783	ENST00000422560	119961	NA	NA	NA
2	156331941	156333565	1625	*	11.68	11.58	11.78	-0.2	0.00281	0.174	Promoter (<=1kb)	447	156324437	156332721	8285	2	ENSG00000153234	ENST00000339562	0	4929	NR4A2	nuclear receptor subfamily 4 group A member 2
22	50531528	50532412	885	*	10.71	10.59	10.82	-0.23	0.00281	0.174	Promoter (<=1kb)	467	50529710	50531822	2113	2	ENSG00000177989	ENST00000468249	0	440836	ODF3B	outer dense fiber of sperm tails 3B
17	82105881	82106805	925	*	9.38	9.2	9.54	-0.34	0.00282	0.175	Promoter (<=1kb)	462	82101460	82106375	4916	2	ENSG00000176155	ENST00000584717	0	284001	CCDC57	coiled-coil domain containing 57
10	119445120	119445895	776	*	8.94	8.74	9.11	-0.37	0.00283	0.175	Intron (ENST00000392870/ENSG00000198873, intron 12 of 15)	455	119452448	119459742	7295	1	ENSG00000198873	ENST00000369108	-6553	2869	GRK5	G protein-coupled receptor kinase 5
2	1817028	1818094	1067	*	10.44	10.32	10.56	-0.24	0.00283	0.175	Intron (ENST00000647755/ENSG00000186487, intron 21 of 24)	447	1824412	1828667	4256	1	ENSG00000232057	ENST00000426976	-6318	NA	NA	NA
13	77329033	77330130	1098	*	11.19	11.07	11.3	-0.23	0.00283	0.175	Promoter (1-2kb)	458	77044657	77327094	282438	2	ENSG00000005810	ENST00000544440	-1939	23077	MYCBP2	MYC binding protein 2
X	20530441	20531028	588	*	8.05	7.78	8.28	-0.5	0.00285	0.176	Distal Intergenic	468	20452108	20452431	324	1	ENSG00000252978	ENST00000517169	78333	NA	NA	NA
22	29072581	29073268	688	*	10.09	10.21	9.95	0.26	0.00286	0.176	Promoter (<=1kb)	467	29073035	29146820	73786	1	ENSG00000183762	ENST00000400335	0	83999	KREMEN1	kringle containing transmembrane protein 1
6	94893118	94893814	697	*	7.76	8	7.47	0.54	0.00286	0.176	Distal Intergenic	451	94446740	94447179	440	2	ENSG00000216853	ENST00000404146	-445939	NA	NA	NA
2	224347056	224347805	750	*	7.77	8.01	7.48	0.53	0.00286	0.176	Distal Intergenic	447	224294930	224295753	824	1	ENSG00000228681	ENST00000434254	52126	NA	NA	NA
5	145495603	145496147	545	*	8.9	9.08	8.7	0.38	0.00288	0.177	Intron (ENST00000510259/ENSG00000186314, intron 1 of 2)	450	145429903	145451099	21197	1	ENSG00000248125	ENST00000513657	65700	NA	NA	NA
1	107647578	107648926	1349	*	9.85	9.98	9.7	0.28	0.00289	0.177	Intron (ENST00000370056/ENSG00000134215, intron 19 of 26)	446	107596295	107673649	77355	2	ENSG00000134215	ENST00000529033	24723	10451	VAV3	vav guanine nucleotide exchange factor 3
5	73638419	73639200	782	*	9.24	9.4	9.06	0.33	0.00289	0.177	Intron (ENST00000296794/ENSG00000214944, intron 1 of 34)	450	73626196	73752977	126782	1	ENSG00000214944	ENST00000509848	12223	64283	ARHGEF28	Rho guanine nucleotide exchange factor 28
6	114342180	114343930	1751	*	10.54	10.42	10.65	-0.23	0.00289	0.177	Promoter (<=1kb)	451	114055586	114343045	287460	2	ENSG00000249853	ENST00000312719	0	222537	HS3ST5	heparan sulfate-glucosamine 3-sulfotransferase 5
6	3517296	3519065	1770	*	11.31	11.21	11.41	-0.2	0.0029	0.177	Distal Intergenic	451	3268973	3457050	188078	2	ENSG00000137266	ENST00000406686	-60246	63027	SLC22A23	solute carrier family 22 member 23
16	4013105	4014170	1066	*	9.78	9.91	9.63	0.29	0.0029	0.177	Promoter (1-2kb)	461	3983392	4015682	32291	2	ENSG00000162104	ENST00000575550	1512	115	ADCY9	adenylate cyclase 9
15	40500598	40501290	693	*	9.57	9.73	9.41	0.32	0.00291	0.177	Intron (ENST00000561460/ENSG00000259536, intron 1 of 3)	460	40508024	40553250	45227	1	ENSG00000259536	ENST00000561039	-6734	NA	NA	NA
1	196464369	196465117	749	*	9.81	9.95	9.66	0.29	0.00292	0.178	Promoter (<=1kb)	446	196225783	196465387	239605	2	ENSG00000162687	ENST00000498426	270	343450	KCNT2	potassium sodium-activated channel subfamily T member 2
17	17877011	17878476	1466	*	11.76	11.66	11.86	-0.2	0.00293	0.178	Intron (ENST00000379504/ENSG00000175662, intron 7 of 14)	462	17846825	17872064	25240	2	ENSG00000175662	ENST00000478943	-4947	146691	TOM1L2	target of myb1 like 2 membrane trafficking protein
7	140175224	140176135	912	*	10.3	10.18	10.42	-0.24	0.00295	0.18	Promoter (<=1kb)	452	140084746	140176983	92238	2	ENSG00000006459	ENST00000397560	848	80853	KDM7A	lysine demethylase 7A
3	48594321	48594881	561	*	10.32	10.19	10.44	-0.25	0.00296	0.18	Promoter (<=1kb)	448	48564073	48595267	31195	2	ENSG00000114270	ENST00000328333	386	1294	COL7A1	collagen type VII alpha 1 chain
16	768182	769079	898	*	10.39	10.25	10.51	-0.25	0.00296	0.18	Promoter (<=1kb)	461	769119	769443	325	2	ENSG00000279136	ENST00000623562	364	NA	NA	NA
1	69121539	69122598	1060	*	8.73	8.91	8.53	0.38	0.00298	0.18	Intron (ENST00000658427/ENSG00000223883, intron 2 of 3)	446	69055903	69219097	163195	1	ENSG00000223883	ENST00000660251	65636	105378785	LINC01707	long intergenic non-protein coding RNA 1707
19	29605679	29606706	1028	*	10.35	10.22	10.48	-0.26	0.00299	0.18	Promoter (<=1kb)	464	29606283	29609242	2960	1	ENSG00000105171	ENST00000586173	0	10775	POP4	POP4 homolog, ribonuclease P/MRP subunit
12	94649364	94650868	1505	*	9.85	9.71	9.98	-0.28	0.00299	0.18	Promoter (<=1kb)	457	94567122	94650557	83436	2	ENSG00000057704	ENST00000261226	0	57458	TMCC3	transmembrane and coiled-coil domain family 3
1	194013631	194014681	1051	*	8.9	9.09	8.69	0.39	0.00299	0.18	Intron (ENST00000656143/ENSG00000227240, intron 4 of 5)	446	194126140	194197587	71448	1	ENSG00000227240	ENST00000655677	-111459	NA	NA	NA
9	116208584	116210035	1452	*	10.84	10.73	10.94	-0.22	0.00299	0.18	Intron (ENST00000328252/ENSG00000182752, intron 3 of 21)	454	116153791	116402321	248531	1	ENSG00000182752	ENST00000328252	54793	5069	PAPPA	pappalysin 1
1	78070321	78071223	903	*	9.73	9.86	9.58	0.28	0.00299	0.18	Intron (ENST00000476882/ENSG00000137960, intron 1 of 2)	446	78088988	78089083	96	2	ENSG00000251958	ENST00000516149	17860	NA	NA	NA
17	15262046	15263610	1565	*	12.2	12.1	12.28	-0.18	0.003	0.181	Promoter (<=1kb)	462	15229773	15263190	33418	2	ENSG00000109099	ENST00000674673	0	5376	PMP22	peripheral myelin protein 22
5	159331162	159332079	918	*	10.64	10.52	10.75	-0.23	0.00301	0.181	Promoter (<=1kb)	450	159331518	159362834	31317	1	ENSG00000249738	ENST00000515337	0	285626	LOC285626	uncharacterized LOC285626
5	13664387	13664918	532	*	8.55	8.74	8.33	0.41	0.00301	0.181	Distal Intergenic	450	13637919	13638381	463	2	ENSG00000243744	ENST00000473590	-26006	NA	NA	NA
5	89351816	89352658	843	*	9.3	9.46	9.11	0.35	0.00301	0.181	Intron (ENST00000514092/ENSG00000248309, intron 4 of 6)	450	89418807	89466398	47592	1	ENSG00000248309	ENST00000508742	-66149	101929423	MEF2C-AS1	MEF2C antisense RNA 1
2	128232666	128233880	1215	*	10.45	10.33	10.57	-0.24	0.00301	0.181	Downstream (2-3kb)	447	128217588	128218072	485	1	ENSG00000238180	ENST00000416102	15078	NA	NA	NA
8	13497327	13498055	729	*	8.79	8.96	8.59	0.37	0.00302	0.181	Promoter (1-2kb)	453	13498859	13499241	383	2	ENSG00000164741	ENST00000517868	1186	10395	DLC1	DLC1 Rho GTPase activating protein
3	197749251	197751108	1858	*	11.48	11.37	11.58	-0.22	0.00302	0.181	Promoter (<=1kb)	448	197749533	197773436	23904	1	ENSG00000122068	ENST00000494309	0	84248	FYTTD1	forty-two-three domain containing 1
X	107716059	107717554	1496	*	10.66	10.54	10.77	-0.23	0.00303	0.181	Promoter (<=1kb)	468	107713221	107716545	3325	2	ENSG00000157514	ENST00000372390	0	1831	TSC22D3	TSC22 domain family member 3
10	29471408	29471935	528	*	7.79	8.02	7.5	0.52	0.00303	0.181	Intron (ENST00000413405/ENSG00000224597, intron 2 of 2)	455	29473534	29481655	8122	2	ENSG00000197321	ENST00000460007	9720	6840	SVIL	supervillin
X	39813522	39814493	972	*	10.99	10.88	11.09	-0.21	0.00304	0.182	Distal Intergenic	468	39791580	39791904	325	2	ENSG00000270759	ENST00000603131	-21618	NA	NA	NA
9	127224036	127225988	1953	*	12.64	12.75	12.52	0.23	0.00305	0.182	Promoter (<=1kb)	454	127224265	127333086	108822	1	ENSG00000136895	ENST00000439286	0	84253	GARNL3	GTPase activating Rap/RanGAP domain like 3
1	23530513	23531773	1261	*	11.26	11.15	11.36	-0.21	0.00305	0.182	Promoter (<=1kb)	446	23506438	23531233	24796	2	ENSG00000007968	ENST00000361729	0	1870	E2F2	E2F transcription factor 2
14	31937704	31938273	570	*	8.79	8.96	8.59	0.38	0.00306	0.182	Distal Intergenic	459	31944853	31950382	5530	1	ENSG00000258474	ENST00000553330	-6580	105370439	LINC02313	long intergenic non-protein coding RNA 2313
5	28365869	28366350	482	*	8.06	8.29	7.8	0.49	0.00307	0.183	Distal Intergenic	450	28285964	28287807	1844	2	ENSG00000249785	ENST00000664667	-78062	105374698	LINC02103	long intergenic non-protein coding RNA 2103
20	20051856	20052968	1113	*	10.58	10.46	10.7	-0.24	0.00308	0.183	Promoter (<=1kb)	465	20052514	20166441	113928	1	ENSG00000089101	ENST00000340348	0	26074	CFAP61	cilia and flagella associated protein 61
14	90815941	90816887	947	*	8.64	8.83	8.42	0.4	0.00308	0.183	Promoter (<=1kb)	459	90524564	90816430	291867	2	ENSG00000165914	ENST00000328459	0	145567	TTC7B	tetratricopeptide repeat domain 7B
19	5804811	5805171	361	*	8.54	8.74	8.31	0.42	0.00309	0.183	Distal Intergenic	464	5788024	5791225	3202	2	ENSG00000141994	ENST00000590110	-13586	56931	DUS3L	dihydrouridine synthase 3 like
5	37703594	37704608	1015	*	10.25	10.38	10.12	0.25	0.00309	0.183	Intron (ENST00000511906/ENSG00000082068, intron 12 of 14)	450	37700331	37700437	107	2	ENSG00000206743	ENST00000384016	-3157	NA	NA	NA
4	108762421	108763475	1055	*	10.3	10.17	10.42	-0.25	0.0031	0.184	Promoter (<=1kb)	449	108742048	108763008	20961	2	ENSG00000164089	ENST00000411864	0	64850	ETNPPL	ethanolamine-phosphate phospho-lyase
7	99562868	99563260	393	*	9.91	10.04	9.77	0.27	0.00312	0.184	3' UTR	452	99558862	99576453	17592	1	ENSG00000197343	ENST00000394163	4006	79027	ZNF655	zinc finger protein 655
13	65600658	65601406	749	*	8.7	8.88	8.49	0.39	0.00312	0.184	Distal Intergenic	458	65787932	65788764	833	2	ENSG00000236565	ENST00000455201	187358	NA	NA	NA
6	42978136	42979781	1646	*	11.57	11.46	11.67	-0.21	0.00312	0.184	Promoter (<=1kb)	451	42963865	42979181	15317	2	ENSG00000124587	ENST00000304611	0	5190	PEX6	peroxisomal biogenesis factor 6
7	29194207	29195650	1444	*	9.57	9.4	9.72	-0.32	0.00312	0.184	Promoter (<=1kb)	452	28995637	29195276	199640	2	ENSG00000106066	ENST00000409850	0	54504	CPVL	carboxypeptidase vitellogenic like
2	74715025	74715972	948	*	10.67	10.55	10.78	-0.22	0.00313	0.184	Distal Intergenic	447	74754773	74760227	5455	1	ENSG00000286739	ENST00000671357	-38801	NA	NA	NA
4	186190690	186192485	1796	*	11.29	11.18	11.39	-0.21	0.00313	0.185	Promoter (<=1kb)	449	186191567	186213463	21897	1	ENSG00000145476	ENST00000378802	0	285440	CYP4V2	cytochrome P450 family 4 subfamily V member 2
1	225845581	225846334	754	*	9.91	9.76	10.04	-0.28	0.00314	0.185	Promoter (<=1kb)	446	225840883	225846522	5640	2	ENSG00000242861	ENST00000424332	188	NA	NA	NA
1	154324610	154325360	751	*	10.39	10.27	10.5	-0.24	0.00315	0.185	Promoter (<=1kb)	446	154325525	154351304	25780	1	ENSG00000143515	ENST00000368489	-165	57198	ATP8B2	ATPase phospholipid transporting 8B2
8	58879445	58880075	631	*	9.68	9.81	9.53	0.29	0.00316	0.185	Intron (ENST00000361421/ENSG00000198846, intron 3 of 8)	453	58814412	58814552	141	2	ENSG00000201231	ENST00000364361	-64893	NA	NA	NA
2	146579052	146579918	867	*	9.56	9.71	9.39	0.33	0.00316	0.185	Distal Intergenic	447	146587506	146589310	1805	1	ENSG00000198526	ENST00000471997	-7588	NA	NA	NA
4	148376036	148376567	532	*	7.99	8.21	7.72	0.5	0.00317	0.186	Intron (ENST00000344721/ENSG00000151623, intron 2 of 8)	449	148194771	148368470	173700	2	ENSG00000151623	ENST00000504753	-7566	4306	NR3C2	nuclear receptor subfamily 3 group C member 2
9	130940946	130941594	649	*	10.1	9.96	10.23	-0.27	0.00318	0.186	Promoter (1-2kb)	454	130938017	130939286	1270	2	ENSG00000130720	ENST00000463475	-1660	84929	FIBCD1	fibrinogen C domain containing 1
12	12859454	12860140	687	*	9.86	9.99	9.72	0.27	0.00318	0.186	Distal Intergenic	457	12850982	12851740	759	1	ENSG00000241352	ENST00000475592	8472	NA	NA	NA
20	4221095	4221758	664	*	8.89	8.69	9.06	-0.37	0.00319	0.186	Promoter (<=1kb)	465	4221681	4222381	701	2	ENSG00000171873	ENST00000621688	623	146	ADRA1D	adrenoceptor alpha 1D
4	6782112	6783923	1812	*	11.77	11.88	11.65	0.24	0.00319	0.186	Promoter (<=1kb)	449	6782642	6824684	42043	1	ENSG00000170871	ENST00000508423	0	9778	KIAA0232	KIAA0232
8	80941130	80941577	448	*	8.36	8.56	8.13	0.43	0.00319	0.186	Distal Intergenic	453	80970291	80975780	5490	2	ENSG00000076641	ENST00000523463	34203	55824	PAG1	phosphoprotein membrane anchor with glycosphingolipid microdomains 1
12	124509494	124510223	730	*	10.49	10.37	10.6	-0.23	0.00319	0.186	Promoter (2-3kb)	457	124513222	124514813	1592	1	ENSG00000214650	ENST00000543970	-2999	NA	NA	NA
20	62413985	62414420	436	*	8.99	8.81	9.16	-0.35	0.0032	0.186	Exon (ENST00000252998/ENSG00000130701, exon 10 of 14)	465	62388632	62407285	18654	2	ENSG00000149679	ENST00000279101	-6700	81928	CABLES2	Cdk5 and Abl enzyme substrate 2
7	152436183	152437066	884	*	10.14	10.27	9.99	0.28	0.00321	0.186	Promoter (<=1kb)	452	152436864	152442847	5984	1	ENSG00000241735	ENST00000648413	0	220832	FABP5P3	fatty acid binding protein 5 pseudogene 3
10	76716952	76717819	868	*	9.31	9.47	9.14	0.33	0.00321	0.186	Distal Intergenic	455	76835377	76835502	126	2	ENSG00000252888	ENST00000517079	117683	NA	NA	NA
5	142713126	142713751	626	*	10.33	10.2	10.44	-0.24	0.00322	0.186	Promoter (2-3kb)	450	142716229	142760470	44242	1	ENSG00000236714	ENST00000659517	-2478	101926975	LINC01844	long intergenic non-protein coding RNA 1844
8	56211156	56212497	1342	*	11.65	11.76	11.54	0.23	0.00322	0.186	Promoter (<=1kb)	453	56211686	56217538	5853	1	ENSG00000170791	ENST00000521831	0	79145	CHCHD7	coiled-coil-helix-coiled-coil-helix domain containing 7
9	98998703	98999398	696	*	8.64	8.43	8.82	-0.4	0.00322	0.186	Intron (ENST00000610452/ENSG00000204291, intron 7 of 42)	454	99038673	99041377	2705	1	ENSG00000204291	ENST00000496686	-39275	1306	COL15A1	collagen type XV alpha 1 chain
1	155125982	155127070	1089	*	11.48	11.36	11.59	-0.23	0.00322	0.186	Promoter (<=1kb)	446	155127876	155134857	6982	1	ENSG00000169242	ENST00000368406	-806	1942	EFNA1	ephrin A1
7	44767867	44769377	1511	*	9.72	9.57	9.85	-0.28	0.00323	0.186	Promoter (2-3kb)	452	44765744	44766554	811	1	ENSG00000122515	ENST00000482322	2123	83637	ZMIZ2	zinc finger MIZ-type containing 2
2	6181576	6182304	729	*	7.7	7.4	7.95	-0.55	0.00323	0.186	Distal Intergenic	447	6302314	6314880	12567	2	ENSG00000234275	ENST00000660708	132576	NA	NA	NA
14	55605465	55606268	804	*	8.9	9.07	8.71	0.36	0.00323	0.186	Intron (ENST00000557267/ENSG00000126777, intron 1 of 1)	459	55601792	55684579	82788	1	ENSG00000126777	ENST00000395311	3673	3895	KTN1	kinectin 1
14	20970777	20971972	1196	*	10.82	10.69	10.93	-0.24	0.00324	0.187	Distal Intergenic	459	20963579	20963867	289	1	ENSG00000243817	ENST00000468631	7198	NA	NA	NA
3	58163907	58165979	2073	*	12.61	12.52	12.69	-0.17	0.00326	0.188	Promoter (<=1kb)	448	58165476	58170978	5503	1	ENSG00000136068	ENST00000484981	0	2317	FLNB	filamin B
14	65411612	65413667	2056	*	12.18	12.08	12.28	-0.2	0.00327	0.188	Promoter (<=1kb)	459	65411863	65561652	149790	1	ENSG00000033170	ENST00000556518	0	2530	FUT8	fucosyltransferase 8
12	7433231	7433760	530	*	8.14	8.35	7.89	0.46	0.00328	0.188	5' UTR	457	7438780	7439990	1211	2	ENSG00000255836	ENST00000538078	6230	NA	NA	NA
20	58692250	58693852	1603	*	11.27	11.39	11.14	0.24	0.00328	0.188	Promoter (<=1kb)	465	58692800	58715844	23045	1	ENSG00000215440	ENST00000356091	0	79716	NPEPL1	aminopeptidase like 1
9	127503922	127504703	782	*	10.38	10.26	10.49	-0.24	0.00328	0.188	Downstream (<1kb)	454	127509888	127516893	7006	2	ENSG00000136830	ENST00000465154	12190	64855	NIBAN2	niban apoptosis regulator 2
13	72166260	72166938	679	*	7.81	8.06	7.52	0.54	0.00329	0.189	Distal Intergenic	458	71913704	71914178	475	2	ENSG00000232881	ENST00000430654	-252082	NA	NA	NA
1	75614556	75616575	2020	*	10.91	10.79	11.01	-0.21	0.00331	0.189	Distal Intergenic	446	75202131	75611116	408986	2	ENSG00000137968	ENST00000370859	-3440	204962	SLC44A5	solute carrier family 44 member 5
2	11829271	11830755	1485	*	11.29	11.18	11.39	-0.2	0.00331	0.189	Distal Intergenic	447	11833926	11866284	32359	1	ENSG00000224184	ENST00000429878	-3171	100506457	MIR3681HG	MIR3681 host gene
6	15949093	15949878	786	*	8.68	8.46	8.86	-0.4	0.00331	0.189	Distal Intergenic	451	15934782	15935315	534	1	ENSG00000214027	ENST00000448802	14311	NA	NA	NA
1	43530530	43532153	1624	*	11	11.1	10.89	0.21	0.00331	0.189	Promoter (<=1kb)	446	43530876	43579285	48410	1	ENSG00000142949	ENST00000617451	0	5792	PTPRF	protein tyrosine phosphatase receptor type F
6	26270953	26271799	847	*	10.53	10.41	10.64	-0.23	0.00333	0.189	Promoter (<=1kb)	451	26269405	26271815	2411	2	ENSG00000273983	ENST00000614378	16	8355	H3C8	H3 clustered histone 8
2	23268480	23269525	1046	*	10.3	10.42	10.17	0.25	0.00333	0.189	Distal Intergenic	447	23330664	23332044	1381	2	ENSG00000223530	ENST00000423706	62519	NA	NA	NA
2	192535928	192536858	931	*	9.37	9.52	9.2	0.32	0.00333	0.189	Distal Intergenic	447	192629919	192645706	15788	1	ENSG00000229395	ENST00000414394	-93061	NA	NA	NA
17	61411404	61412890	1487	*	11.42	11.31	11.52	-0.21	0.00333	0.189	Promoter (<=1kb)	462	61411751	61413280	1530	1	ENSG00000187013	ENST00000623772	0	388407	C17orf82	chromosome 17 open reading frame 82
3	196631921	196633211	1291	*	10.87	10.75	10.98	-0.23	0.00333	0.189	Promoter (<=1kb)	448	196631498	196632587	1090	2	ENSG00000232065	ENST00000441644	0	101929769	LINC01063	long intergenic non-protein coding RNA 1063
12	39831606	39832322	717	*	7.87	8.1	7.6	0.51	0.00334	0.189	Intron (ENST00000468200/ENSG00000180116, intron 18 of 18)	457	39830125	39835760	5636	2	ENSG00000151229	ENST00000505338	3438	114134	SLC2A13	solute carrier family 2 member 13
2	220959274	220959924	651	*	8.22	7.97	8.43	-0.46	0.00334	0.189	Distal Intergenic	447	220811618	220853456	41839	2	ENSG00000286272	ENST00000651076	-105818	NA	NA	NA
4	1809733	1810612	880	*	9.94	9.8	10.07	-0.28	0.00335	0.189	Downstream (<1kb)	449	1804492	1805859	1368	1	ENSG00000068078	ENST00000469068	5241	2261	FGFR3	fibroblast growth factor receptor 3
X	78653014	78654117	1104	*	10.46	10.57	10.33	0.25	0.00335	0.189	Downstream (1-2kb)	468	78656068	78659328	3261	2	ENSG00000179300	ENST00000321110	5211	203430	RTL3	retrotransposon Gag like 3
9	21294110	21294983	874	*	9.8	9.93	9.66	0.28	0.00336	0.189	Distal Intergenic	454	21304326	21305312	987	2	ENSG00000147873	ENST00000610521	10329	3442	IFNA5	interferon alpha 5
7	84647638	84648342	705	*	8.25	8.46	8.01	0.45	0.00336	0.189	Distal Intergenic	452	84549206	84584322	35117	1	ENSG00000235139	ENST00000446000	98432	101927378	LOC101927378	uncharacterized LOC101927378
17	75764150	75765593	1444	*	11.43	11.32	11.53	-0.21	0.00336	0.189	Promoter (<=1kb)	462	75751594	75765236	13643	2	ENSG00000108479	ENST00000225614	0	2584	GALK1	galactokinase 1
5	77180047	77182239	2193	*	11.84	11.74	11.93	-0.19	0.00336	0.189	Intron (ENST00000646262/ENSG00000284762, intron 3 of 23)	450	77210449	77331473	121025	1	ENSG00000113231	ENST00000505926	-28210	8622	PDE8B	phosphodiesterase 8B
5	80487745	80488771	1027	*	12	11.89	12.09	-0.2	0.00336	0.189	Promoter (<=1kb)	450	80487969	80510807	22839	1	ENSG00000152380	ENST00000502608	0	167555	FAM151B	family with sequence similarity 151 member B
17	69414314	69415357	1044	*	10.28	10.16	10.4	-0.24	0.00336	0.189	Promoter (<=1kb)	462	69414697	69553865	139169	1	ENSG00000108984	ENST00000590474	0	5608	MAP2K6	mitogen-activated protein kinase kinase 6
5	140363025	140363731	707	*	9.33	9.16	9.48	-0.32	0.00336	0.189	Promoter (2-3kb)	450	140365857	140367728	1872	1	ENSG00000113073	ENST00000514849	-2126	83697	SLC4A9	solute carrier family 4 member 9
9	128249966	128251107	1142	*	11.43	11.54	11.31	0.23	0.00337	0.19	Promoter (<=1kb)	454	128250802	128254162	3361	1	ENSG00000106976	ENST00000625457	0	1759	DNM1	dynamin 1
19	1219962	1221273	1312	*	10.94	10.83	11.04	-0.21	0.00338	0.19	Promoter (<=1kb)	464	1220013	1223104	3092	1	ENSG00000118046	ENST00000591133	0	6794	STK11	serine/threonine kinase 11
1	67053057	67054663	1607	*	11.48	11.38	11.58	-0.2	0.0034	0.19	Promoter (<=1kb)	446	66999350	67054148	54799	2	ENSG00000116704	ENST00000235345	0	23169	SLC35D1	solute carrier family 35 member D1
3	316493	317240	748	*	8.03	8.24	7.77	0.47	0.0034	0.19	Promoter (2-3kb)	448	319683	409412	89730	1	ENSG00000134121	ENST00000620033	-2443	10752	CHL1	cell adhesion molecule L1 like
3	50120981	50121947	967	*	10.52	10.4	10.63	-0.23	0.0034	0.19	Intron (ENST00000437204/ENSG00000235016, intron 3 of 3)	448	50116545	50117175	631	1	ENSG00000003756	ENST00000461242	4436	10181	RBM5	RNA binding motif protein 5
17	64622992	64623792	801	*	8.73	8.92	8.52	0.39	0.00341	0.19	Intron (ENST00000262435/ENSG00000108854, intron 1 of 18)	462	64593015	64598445	5431	2	ENSG00000108854	ENST00000580246	-24547	64750	SMURF2	SMAD specific E3 ubiquitin protein ligase 2
4	109211685	109212428	744	*	9.69	9.83	9.53	0.29	0.00341	0.19	Intron (ENST00000399132/ENSG00000188517, intron 3 of 37)	449	108810721	109302367	491647	2	ENSG00000188517	ENST00000494183	89939	84570	COL25A1	collagen type XXV alpha 1 chain
3	194270684	194271728	1045	*	9.88	9.73	10.01	-0.28	0.00341	0.19	Distal Intergenic	448	194276682	194287368	10687	1	ENSG00000228271	ENST00000440556	-4954	105374289	LINC02048	long intergenic non-protein coding RNA 2048
6	49667919	49668927	1009	*	8.43	8.62	8.2	0.42	0.00342	0.19	Distal Intergenic	451	49615116	49636839	21724	2	ENSG00000112077	ENST00000642530	-31080	6005	RHAG	Rh associated glycoprotein
2	70301101	70302322	1222	*	10.94	10.82	11.04	-0.22	0.00342	0.19	Promoter (<=1kb)	447	70295975	70302090	6116	2	ENSG00000035141	ENST00000037869	0	84908	FAM136A	family with sequence similarity 136 member A
16	30095988	30096659	672	*	10.43	10.57	10.29	0.28	0.00342	0.19	Promoter (<=1kb)	461	30092314	30096205	3892	2	ENSG00000090238	ENST00000565479	0	83719	YPEL3	yippee like 3
2	189409723	189410214	492	*	8.18	8.39	7.94	0.45	0.00343	0.19	Distal Intergenic	447	189441446	189475546	34101	1	ENSG00000115368	ENST00000436347	-31232	84128	WDR75	WD repeat domain 75
9	95854497	95855009	513	*	8.71	8.89	8.5	0.39	0.00343	0.19	Intron (ENST00000433656/ENSG00000175611, intron 1 of 3)	454	95859904	95860016	113	1	ENSG00000252847	ENST00000517038	-4895	NA	NA	NA
5	59517974	59518687	714	*	8.04	8.26	7.79	0.47	0.00343	0.19	Intron (ENST00000340635/ENSG00000113448, intron 1 of 14)	450	59528861	59529251	391	1	ENSG00000251306	ENST00000509515	-10174	NA	NA	NA
2	132438354	132439187	834	*	9.56	9.7	9.39	0.31	0.00344	0.191	Intron (ENST00000329321/ENSG00000183840, intron 1 of 1)	447	132417043	132418529	1487	1	ENSG00000183840	ENST00000622084	21311	2863	GPR39	G protein-coupled receptor 39
X	118975932	118977170	1239	*	11.36	11.25	11.46	-0.21	0.00344	0.191	Promoter (<=1kb)	468	118976332	119017983	41652	1	ENSG00000175556	ENST00000472173	0	79836	LONRF3	LON peptidase N-terminal domain and ring finger 3
1	110312293	110313140	848	*	8.78	8.58	8.95	-0.37	0.00344	0.191	Intron (ENST00000449169/ENSG00000227963, intron 2 of 3)	446	110338506	110346673	8168	1	ENSG00000162775	ENST00000652747	-25366	64783	RBM15	RNA binding motif protein 15
1	94925476	94927577	2102	*	12.08	11.98	12.18	-0.2	0.00346	0.191	Promoter (<=1kb)	446	94896949	94925808	28860	2	ENSG00000117519	ENST00000545882	0	1266	CNN3	calponin 3
4	55866242	55866727	486	*	8.45	8.65	8.23	0.42	0.00347	0.191	Intron (ENST00000381295/ENSG00000090989, intron 4 of 18)	449	55858339	55868753	10415	1	ENSG00000090989	ENST00000505501	7903	55763	EXOC1	exocyst complex component 1
12	52884663	52885480	818	*	9.4	9.23	9.55	-0.32	0.00347	0.191	Promoter (<=1kb)	457	52885429	52886385	957	1	ENSG00000241146	ENST00000485823	0	NA	NA	NA
17	82351549	82352382	834	*	9.62	9.46	9.77	-0.32	0.00348	0.191	Distal Intergenic	462	82359247	82363775	4529	1	ENSG00000182459	ENST00000333437	-6865	400629	TEX19	testis expressed 19
7	151080490	151081690	1201	*	11.6	11.49	11.7	-0.2	0.00348	0.191	Promoter (<=1kb)	452	151076593	151080795	4203	2	ENSG00000164896	ENST00000540185	0	10922	FASTK	Fas activated serine/threonine kinase
10	29805164	29805962	799	*	10.13	9.99	10.26	-0.27	0.00348	0.191	Distal Intergenic	455	29457361	29736959	279599	2	ENSG00000197321	ENST00000674475	-68205	6840	SVIL	supervillin
5	16870351	16870884	534	*	8.96	9.13	8.77	0.36	0.00349	0.191	Intron (ENST00000513610/ENSG00000145555, intron 2 of 40)	450	16853994	16854114	121	1	ENSG00000253093	ENST00000517284	16357	NA	NA	NA
2	46985954	46987510	1557	*	10.87	10.76	10.97	-0.21	0.00349	0.191	Intron (ENST00000409245/ENSG00000068724, intron 6 of 20)	447	46994231	47075324	81094	1	ENSG00000068724	ENST00000484061	-6721	57217	TTC7A	tetratricopeptide repeat domain 7A
19	45792074	45793319	1246	*	10.93	11.05	10.8	0.25	0.00349	0.191	Promoter (<=1kb)	464	45782947	45792802	9856	2	ENSG00000185800	ENST00000377735	0	1762	DMWD	DM1 locus, WD repeat containing
1	3547212	3548803	1592	*	12.42	12.33	12.51	-0.18	0.00349	0.191	Intron (ENST00000356575/ENSG00000162591, intron 4 of 36)	446	3560695	3560790	96	2	ENSG00000207776	ENST00000385042	11987	693135	MIR551A	microRNA 551a
7	96084881	96085651	771	*	8.97	9.14	8.79	0.35	0.00349	0.191	Intron (ENST00000537881/ENSG00000158560, intron 16 of 16)	452	96118647	96119995	1349	1	ENSG00000279067	ENST00000625023	-32996	NA	NA	NA
22	50209163	50210348	1186	*	9.4	9.24	9.55	-0.32	0.00349	0.191	Promoter (<=1kb)	467	50208461	50209542	1082	2	ENSG00000273137	ENST00000608016	0	NA	NA	NA
16	24748067	24748654	588	*	8.62	8.81	8.4	0.41	0.0035	0.191	Intron (ENST00000566108/ENSG00000090905, intron 2 of 2)	461	24729713	24777027	47315	1	ENSG00000090905	ENST00000562829	18354	27327	TNRC6A	trinucleotide repeat containing adaptor 6A
1	230642006	230643104	1099	*	11.28	11.17	11.37	-0.2	0.0035	0.191	Promoter (<=1kb)	446	230642481	230693982	51502	1	ENSG00000135775	ENST00000366669	0	22796	COG2	component of oligomeric golgi complex 2
5	43041467	43043503	2037	*	12.71	12.62	12.81	-0.19	0.0035	0.191	Promoter (<=1kb)	450	43039233	43043170	3938	2	ENSG00000177721	ENST00000314890	0	389289	ANXA2R	annexin A2 receptor
8	98940777	98941944	1168	*	10.72	10.6	10.83	-0.23	0.00351	0.191	Promoter (<=1kb)	453	98454695	98942571	487877	2	ENSG00000104375	ENST00000523601	627	6788	STK3	serine/threonine kinase 3
15	34624850	34625460	611	*	9.69	9.82	9.54	0.29	0.00351	0.191	Distal Intergenic	460	34597458	34597558	101	2	ENSG00000252425	ENST00000516616	-27292	NA	NA	NA
13	33610362	33611840	1479	*	11.69	11.59	11.78	-0.19	0.00352	0.191	Promoter (<=1kb)	458	33610967	33611522	556	1	ENSG00000234535	ENST00000442716	0	NA	NA	NA
9	118272933	118273794	862	*	8.08	8.32	7.81	0.51	0.00352	0.191	Distal Intergenic	454	118082869	118083382	514	2	ENSG00000234782	ENST00000413759	-189551	NA	NA	NA
1	11654244	11655203	960	*	9.73	9.87	9.56	0.31	0.00353	0.191	Promoter (<=1kb)	446	11648387	11654429	6043	2	ENSG00000116661	ENST00000354287	0	26232	FBXO2	F-box protein 2
8	37479052	37479935	884	*	9.5	9.34	9.64	-0.3	0.00353	0.191	Promoter (<=1kb)	453	37480089	37480809	721	1	ENSG00000253388	ENST00000517897	-154	NA	NA	NA
13	49584829	49586204	1376	*	10.85	10.73	10.96	-0.23	0.00353	0.191	Promoter (<=1kb)	458	49531946	49585558	53613	2	ENSG00000136144	ENST00000378302	0	55213	RCBTB1	RCC1 and BTB domain containing protein 1
1	232510679	232511491	813	*	7.9	8.13	7.64	0.49	0.00354	0.192	Intron (ENST00000366630/ENSG00000116991, intron 2 of 21)	446	232397968	232515566	117599	2	ENSG00000116991	ENST00000262861	4075	57568	SIPA1L2	signal induced proliferation associated 1 like 2
5	139708935	139709951	1017	*	10.91	10.79	11.02	-0.23	0.00355	0.192	Intron (ENST00000515296/ENSG00000249526, intron 2 of 5)	450	139717985	139718090	106	2	ENSG00000200756	ENST00000363886	8139	NA	NA	NA
1	223123546	223124076	531	*	7.7	7.4	7.94	-0.54	0.00355	0.192	Exon (ENST00000642471/ENSG00000187554, exon 2 of 2)	446	223123488	223132579	9092	2	ENSG00000187554	ENST00000642471	8503	7100	TLR5	toll like receptor 5
13	20813670	20814910	1241	*	10.75	10.86	10.63	0.23	0.00355	0.192	Intron (ENST00000255305/ENSG00000132953, intron 9 of 22)	458	20728731	20773961	45231	2	ENSG00000150456	ENST00000382758	-39709	221143	EEF1AKMT1	EEF1A lysine methyltransferase 1
10	68096988	68097723	736	*	10.77	10.88	10.65	0.22	0.00356	0.192	Distal Intergenic	455	68106117	68212012	105896	1	ENSG00000138347	ENST00000540630	-8394	84665	MYPN	myopalladin
20	53592971	53594821	1851	*	12.15	12.26	12.03	0.23	0.00356	0.192	Promoter (<=1kb)	465	53567065	53593839	26775	2	ENSG00000171940	ENST00000371471	0	7764	ZNF217	zinc finger protein 217
13	69474141	69474720	580	*	8.19	8.39	7.95	0.45	0.00357	0.193	Distal Intergenic	458	69408216	69408735	520	2	ENSG00000224640	ENST00000424058	-65406	NA	NA	NA
15	44632910	44633550	641	*	8.13	8.35	7.88	0.47	0.00358	0.193	Exon (ENST00000261866/ENSG00000104133, exon 8 of 40)	460	44615428	44621866	6439	2	ENSG00000104133	ENST00000558989	-11044	80208	SPG11	SPG11 vesicle trafficking associated, spatacsin
3	153140432	153141176	745	*	10.12	10.25	9.99	0.26	0.00358	0.193	Distal Intergenic	448	153129074	153129640	567	2	ENSG00000241671	ENST00000477323	-10792	NA	NA	NA
12	80936418	80937636	1219	*	10.05	9.91	10.18	-0.27	0.00359	0.193	Promoter (<=1kb)	457	80936414	80940246	3833	1	ENSG00000111058	ENST00000616449	4	79611	ACSS3	acyl-CoA synthetase short chain family member 3
1	197915728	197917490	1763	*	11.25	11.15	11.35	-0.2	0.00359	0.193	Promoter (<=1kb)	446	197915837	197932266	16430	1	ENSG00000143355	ENST00000561173	0	56956	LHX9	LIM homeobox 9
14	22088603	22089298	696	*	7.94	8.17	7.68	0.49	0.0036	0.193	Promoter (2-3kb)	459	22086407	22086961	555	1	ENSG00000211803	ENST00000390451	2196	NA	NA	NA
3	170714198	170714941	744	*	8.16	8.37	7.92	0.45	0.00361	0.193	Intron (ENST00000486975/ENSG00000285218, intron 3 of 3)	448	170692014	170733921	41908	2	ENSG00000286695	ENST00000660477	18980	NA	NA	NA
7	13198572	13199371	800	*	8.75	8.92	8.55	0.38	0.00361	0.193	Intron (ENST00000639998/ENSG00000229618, intron 3 of 7)	452	13101497	13702761	601265	1	ENSG00000229618	ENST00000657198	97075	NA	NA	NA
12	49622633	49624033	1401	*	11.29	11.39	11.17	0.22	0.00362	0.193	Promoter (<=1kb)	457	49623414	49632037	8624	1	ENSG00000110844	ENST00000551418	0	25766	PRPF40B	pre-mRNA processing factor 40 homolog B
14	22852876	22853836	961	*	9.9	9.76	10.02	-0.27	0.00363	0.193	Promoter (<=1kb)	459	22852616	22852728	113	2	ENSG00000212335	ENST00000391033	-148	NA	NA	NA
10	61837054	61837998	945	*	9.82	9.95	9.68	0.27	0.00363	0.193	Distal Intergenic	455	61781745	61821246	39502	2	ENSG00000233643	ENST00000441001	-15808	NA	NA	NA
4	152935676	152937364	1689	*	10.41	10.28	10.53	-0.25	0.00363	0.193	Promoter (<=1kb)	449	152936352	152979686	43335	1	ENSG00000137460	ENST00000511601	0	85462	FHDC1	FH2 domain containing 1
5	175202291	175203060	770	*	9.22	9.04	9.39	-0.34	0.00363	0.193	Distal Intergenic	450	175290731	175291252	522	1	ENSG00000248355	ENST00000512757	-87671	NA	NA	NA
8	89983671	89984874	1204	*	11.78	11.69	11.87	-0.19	0.00363	0.193	Promoter (<=1kb)	453	89933331	89984667	51337	2	ENSG00000104320	ENST00000265433	0	4683	NBN	nibrin
7	148987058	148987329	272	*	8.4	8.6	8.18	0.42	0.00363	0.193	Promoter (<=1kb)	452	148987136	148987248	113	2	ENSG00000201098	ENST00000364228	0	6084	RNY1	RNA, Ro60-associated Y1
7	29622370	29623251	882	*	10.53	10.64	10.41	0.22	0.00364	0.194	Promoter (2-3kb)	452	29625870	29625983	114	1	ENSG00000223437	ENST00000445144	-2619	NA	NA	NA
3	61560535	61562224	1690	*	9.72	9.57	9.86	-0.29	0.00365	0.194	Promoter (<=1kb)	448	61561569	61771395	209827	1	ENSG00000144724	ENST00000495879	0	5793	PTPRG	protein tyrosine phosphatase receptor type G
3	149224641	149225747	1107	*	9.95	10.07	9.81	0.26	0.00365	0.194	Promoter (<=1kb)	448	149224138	149226334	2197	1	ENSG00000286714	ENST00000663884	503	NA	NA	NA
4	124203705	124204475	771	*	10.35	10.46	10.22	0.24	0.00365	0.194	Intron (ENST00000507299/ENSG00000249837, intron 3 of 4)	449	124149377	124252044	102668	2	ENSG00000249837	ENST00000507299	47569	NA	NA	NA
19	3544748	3545723	976	*	9.76	9.62	9.9	-0.28	0.00366	0.194	Promoter (<=1kb)	464	3544199	3557569	13371	1	ENSG00000267436	ENST00000589360	549	NA	NA	NA
18	45569457	45570745	1289	*	10.61	10.5	10.72	-0.22	0.00366	0.194	Intron (ENST00000586448/ENSG00000132874, intron 2 of 20)	463	45573084	45575504	2421	2	ENSG00000267193	ENST00000656053	4759	NA	NA	NA
2	142130143	142131748	1606	*	10.91	10.8	11.01	-0.21	0.00367	0.194	Promoter (<=1kb)	447	140231423	142131016	1899594	2	ENSG00000168702	ENST00000389484	0	53353	LRP1B	LDL receptor related protein 1B
19	16247395	16248166	772	*	9.3	9.13	9.45	-0.32	0.00367	0.194	Distal Intergenic	464	16234044	16234764	721	1	ENSG00000072958	ENST00000592703	13351	8907	AP1M1	adaptor related protein complex 1 subunit mu 1
5	164663205	164664110	906	*	8.64	8.82	8.42	0.41	0.00368	0.194	Intron (ENST00000517508/ENSG00000241956, intron 4 of 5)	450	164601002	164601452	451	2	ENSG00000253600	ENST00000522454	-61753	NA	NA	NA
13	41960345	41961592	1248	*	10.64	10.52	10.74	-0.23	0.00368	0.194	Promoter (<=1kb)	458	41566835	41961109	394275	2	ENSG00000102763	ENST00000379310	0	23078	VWA8	von Willebrand factor A domain containing 8
1	54541730	54543077	1348	*	12.02	11.93	12.11	-0.18	0.00369	0.194	Promoter (<=1kb)	446	54542257	54610124	67868	1	ENSG00000162390	ENST00000481208	0	26027	ACOT11	acyl-CoA thioesterase 11
1	157991992	157992437	446	*	8.78	8.57	8.95	-0.38	0.0037	0.195	Promoter (<=1kb)	446	157993273	158096051	102779	1	ENSG00000183853	ENST00000360089	-836	55243	KIRREL1	kirre like nephrin family adhesion molecule 1
7	1065590	1066502	913	*	9.29	9.12	9.45	-0.32	0.00371	0.195	Intron (ENST00000357429/ENSG00000146540, intron 2 of 4)	452	1055360	1059261	3902	2	ENSG00000257607	ENST00000549241	-6329	NA	NA	NA
20	38893644	38894707	1064	*	9.61	9.46	9.75	-0.29	0.00371	0.195	Intron (ENST00000299824/ENSG00000101445, intron 3 of 10)	465	38872770	38873074	305	1	ENSG00000240474	ENST00000470786	20874	NA	NA	NA
15	100879063	100880229	1167	*	11.24	11.34	11.12	0.23	0.00371	0.195	Promoter (<=1kb)	460	100879813	100896014	16202	1	ENSG00000184254	ENST00000558033	0	220	ALDH1A3	aldehyde dehydrogenase 1 family member A3
7	99557906	99559303	1398	*	11.58	11.48	11.67	-0.19	0.00372	0.195	Promoter (<=1kb)	452	99558406	99564705	6300	1	ENSG00000197343	ENST00000320583	0	79027	ZNF655	zinc finger protein 655
8	37637277	37638715	1439	*	11.19	11.09	11.29	-0.21	0.00372	0.195	Intron (ENST00000519978/ENSG00000253344, intron 1 of 1)	453	37600537	37625873	25337	2	ENSG00000254306	ENST00000517714	-11404	NA	NA	NA
5	127813480	127814294	815	*	10.22	10.34	10.1	0.24	0.00373	0.196	Intron (ENST00000514853/ENSG00000230561, intron 5 of 6)	450	127784618	127787042	2425	2	ENSG00000251032	ENST00000509510	-26438	NA	NA	NA
19	7505865	7507097	1233	*	11.55	11.67	11.43	0.24	0.00373	0.196	Promoter (<=1kb)	464	7506795	7508447	1653	1	ENSG00000198723	ENST00000601292	0	374877	TEX45	testis expressed 45
1	157045192	157046553	1362	*	11.49	11.61	11.37	0.23	0.00374	0.196	Promoter (<=1kb)	446	156934840	157045742	110903	2	ENSG00000132694	ENST00000368194	0	9826	ARHGEF11	Rho guanine nucleotide exchange factor 11
3	30357036	30358405	1370	*	9.91	10.04	9.77	0.26	0.00374	0.196	Distal Intergenic	448	30304321	30304536	216	2	ENSG00000281710	ENST00000628922	-52500	NA	NA	NA
7	74206451	74207103	653	*	9.47	9.31	9.61	-0.3	0.00376	0.196	Promoter (2-3kb)	452	74209396	74229834	20439	1	ENSG00000086730	ENST00000344995	-2293	7462	LAT2	linker for activation of T cells family member 2
8	133793176	133793729	554	*	7.93	8.15	7.67	0.48	0.00376	0.196	Intron (ENST00000517695/ENSG00000253561, intron 1 of 2)	453	133786093	133786268	176	2	ENSG00000254313	ENST00000523552	-6908	NA	NA	NA
4	52037706	52038826	1121	*	10.12	10.25	9.98	0.26	0.00378	0.196	Promoter (<=1kb)	449	52020706	52038299	17594	2	ENSG00000163069	ENST00000381431	0	6443	SGCB	sarcoglycan beta
12	90816450	90817217	768	*	8.66	8.84	8.46	0.38	0.00378	0.196	Intron (ENST00000652014/ENSG00000286021, intron 5 of 5)	457	90809276	90810680	1405	1	ENSG00000257787	ENST00000549669	7174	NA	NA	NA
8	24998329	24999498	1170	*	11.01	10.91	11.11	-0.21	0.00378	0.196	Promoter (<=1kb)	453	25000436	25003439	3004	1	ENSG00000288055	ENST00000670816	-938	NA	NA	NA
3	56801368	56802463	1096	*	11.31	11.19	11.42	-0.23	0.00378	0.196	Promoter (<=1kb)	448	56727420	56801949	74530	2	ENSG00000163947	ENST00000296315	0	50650	ARHGEF3	Rho guanine nucleotide exchange factor 3
3	43996250	43997263	1014	*	10.64	10.52	10.74	-0.22	0.00378	0.196	Promoter (<=1kb)	448	43996896	43997443	548	1	ENSG00000271192	ENST00000605537	0	NA	NA	NA
1	222817531	222817990	460	*	10.22	10.34	10.09	0.25	0.00379	0.196	Promoter (2-3kb)	446	222815359	222837384	22026	1	ENSG00000154309	ENST00000663328	2172	84976	DISP1	dispatched RND transporter family member 1
10	93028869	93029447	579	*	8.33	8.52	8.1	0.42	0.00379	0.196	Intron (ENST00000671701/ENSG00000138190, intron 21 of 22)	455	93059663	93060426	764	2	ENSG00000226425	ENST00000444965	30979	NA	NA	NA
20	44730348	44730863	516	*	10.07	10.2	9.93	0.27	0.0038	0.196	Intron (ENST00000427598/ENSG00000244558, intron 1 of 2)	465	44723657	44728509	4853	1	ENSG00000064205	ENST00000471629	6691	8839	CCN5	cellular communication network factor 5
13	80040447	80041158	712	*	9.66	9.8	9.51	0.28	0.0038	0.196	Intron (ENST00000648514/ENSG00000284196, intron 6 of 6)	458	80041725	80057110	15386	2	ENSG00000284196	ENST00000638633	15952	NA	NA	NA
15	40857484	40858403	920	*	10.23	10.09	10.36	-0.27	0.0038	0.196	Promoter (1-2kb)	460	40855801	40856899	1099	1	ENSG00000166145	ENST00000568200	1683	6692	SPINT1	serine peptidase inhibitor, Kunitz type 1
5	44365120	44365862	743	*	8.6	8.79	8.38	0.4	0.0038	0.196	Intron (ENST00000264664/ENSG00000070193, intron 1 of 2)	450	44388732	44413989	25258	1	ENSG00000248464	ENST00000502457	-22870	101927075	FGF10-AS1	FGF10 antisense RNA 1
5	27568740	27569181	442	*	8.09	8.31	7.84	0.46	0.00381	0.197	Distal Intergenic	450	27493359	27496404	3046	1	ENSG00000250337	ENST00000671061	75381	643401	PURPL	p53 upregulated regulator of p53 levels
10	104337576	104338923	1348	*	10.85	10.74	10.96	-0.22	0.00382	0.197	Promoter (<=1kb)	455	104309700	104338465	28766	2	ENSG00000148841	ENST00000337478	0	85450	ITPRIP	inositol 1,4,5-trisphosphate receptor interacting protein
9	38516197	38516907	711	*	7.91	8.14	7.65	0.49	0.00382	0.197	Intron (ENST00000635962/ENSG00000283162, intron 8 of 9)	454	38526831	38527032	202	1	ENSG00000243085	ENST00000451357	-9924	NA	NA	NA
1	15923278	15923643	366	*	8.16	8.37	7.92	0.45	0.00382	0.197	Intron (ENST00000673875/ENSG00000065526, intron 11 of 11)	446	15917698	15917908	211	2	ENSG00000270620	ENST00000604816	-5370	NA	NA	NA
2	28594147	28594924	778	*	9.83	9.69	9.96	-0.27	0.00383	0.197	3' UTR	447	28601887	28618452	16566	1	ENSG00000163803	ENST00000479065	-6963	151056	PLB1	phospholipase B1
5	98772981	98774698	1718	*	12.49	12.41	12.58	-0.17	0.00383	0.197	Promoter (<=1kb)	450	98773663	98796494	22832	1	ENSG00000174136	ENST00000513185	0	285704	RGMB	repulsive guidance molecule BMP co-receptor b
5	27708449	27708990	542	*	8.61	8.8	8.38	0.42	0.00383	0.197	Distal Intergenic	450	27493359	27496404	3046	1	ENSG00000250337	ENST00000671061	215090	643401	PURPL	p53 upregulated regulator of p53 levels
1	78490613	78492058	1446	*	10.35	10.22	10.46	-0.25	0.00384	0.197	Promoter (<=1kb)	446	78490974	78540701	49728	1	ENSG00000122420	ENST00000370757	0	5737	PTGFR	prostaglandin F receptor
5	52787513	52788882	1370	*	11.7	11.61	11.79	-0.18	0.00384	0.197	Promoter (<=1kb)	450	52787916	52804044	16129	1	ENSG00000152684	ENST00000274311	0	53918	PELO	pelota mRNA surveillance and ribosome rescue factor
17	35141617	35142696	1080	*	10.63	10.52	10.74	-0.22	0.00385	0.197	Promoter (<=1kb)	462	35128730	35142303	13574	2	ENSG00000073536	ENST00000442241	0	54475	NLE1	notchless homolog 1
20	2524380	2525517	1138	*	9.22	9.05	9.38	-0.33	0.00385	0.197	Promoter (<=1kb)	465	2481823	2524522	42700	2	ENSG00000088876	ENST00000612935	0	79175	ZNF343	zinc finger protein 343
16	1308649	1310253	1605	*	11.23	11.32	11.12	0.2	0.00385	0.197	Promoter (<=1kb)	461	1308880	1327018	18139	1	ENSG00000103275	ENST00000355803	0	7329	UBE2I	ubiquitin conjugating enzyme E2 I
2	10385529	10386733	1205	*	10.91	10.8	11.02	-0.21	0.00388	0.198	Intron (ENST00000423674/ENSG00000115756, intron 1 of 3)	447	10368764	10427616	58853	1	ENSG00000115756	ENST00000620771	16765	3241	HPCAL1	hippocalcin like 1
8	23019049	23020133	1085	*	9.55	9.38	9.7	-0.31	0.00389	0.198	Promoter (<=1kb)	453	23001447	23019261	17815	2	ENSG00000245025	ENST00000665917	0	NA	NA	NA
21	30718210	30718860	651	*	8.58	8.77	8.37	0.39	0.00389	0.198	Promoter (<=1kb)	466	30718525	30718777	253	2	ENSG00000231068	ENST00000444335	0	100288323	KRTAP21-3	keratin associated protein 21-3
13	104140373	104141032	660	*	8.47	8.65	8.25	0.4	0.0039	0.199	Distal Intergenic	458	104125930	104134257	8328	1	ENSG00000287734	ENST00000670156	14443	105370340	LOC105370340	uncharacterized LOC105370340
1	211654975	211655715	741	*	9.54	9.39	9.68	-0.29	0.00392	0.199	Promoter (2-3kb)	446	211652147	211654622	2476	1	ENSG00000227764	ENST00000653761	2828	105748977	LINC01693	long intergenic non-protein coding RNA 1693
6	129795193	129795759	567	*	7.88	8.11	7.6	0.51	0.00392	0.199	Distal Intergenic	451	129800908	129802214	1307	1	ENSG00000218725	ENST00000404344	-5149	NA	NA	NA
1	81142205	81142922	718	*	8.14	8.35	7.9	0.45	0.00393	0.199	Distal Intergenic	446	81098267	81099005	739	2	ENSG00000229752	ENST00000417407	-43200	NA	NA	NA
1	211698315	211699216	902	*	10.06	9.92	10.18	-0.26	0.00393	0.199	Distal Intergenic	446	211686522	211690103	3582	1	ENSG00000231057	ENST00000443174	11793	NA	NA	NA
6	125747519	125748787	1269	*	9.73	9.57	9.86	-0.29	0.00393	0.199	Promoter (<=1kb)	451	125747664	125761269	13606	1	ENSG00000135547	ENST00000368365	0	23493	HEY2	hes related family bHLH transcription factor with YRPW motif 2
21	43864203	43866092	1890	*	10.44	10.56	10.31	0.25	0.00393	0.199	Promoter (<=1kb)	466	43865223	43987592	122370	1	ENSG00000160216	ENST00000291572	0	56894	AGPAT3	1-acylglycerol-3-phosphate O-acyltransferase 3
2	33522558	33522977	420	*	7.74	7.44	7.99	-0.55	0.00394	0.199	Promoter (1-2kb)	447	33524430	33530944	6515	1	ENSG00000152689	ENST00000477927	-1453	25780	RASGRP3	RAS guanyl releasing protein 3
20	9200537	9201093	557	*	8	8.21	7.74	0.47	0.00394	0.199	Intron (ENST00000407043/ENSG00000101333, intron 2 of 6)	465	9217390	9480813	263424	1	ENSG00000101333	ENST00000278655	-16297	5332	PLCB4	phospholipase C beta 4
3	124584271	124585373	1103	*	10.69	10.58	10.8	-0.22	0.00394	0.199	Promoter (<=1kb)	448	124584659	124726325	141667	1	ENSG00000160145	ENST00000291478	0	8997	KALRN	kalirin RhoGEF kinase
15	40088307	40089358	1052	*	10.85	10.73	10.97	-0.24	0.00395	0.2	Promoter (<=1kb)	460	40088832	40089386	555	1	ENSG00000259409	ENST00000559022	0	NA	NA	NA
4	20520769	20521372	604	*	8.33	8.52	8.1	0.42	0.00396	0.2	Intron (ENST00000504154/ENSG00000145147, intron 12 of 36)	449	20528275	20528384	110	1	ENSG00000207732	ENST00000384999	-6903	407000	MIR218-1	microRNA 218-1
1	7341078	7342134	1057	*	10.7	10.59	10.81	-0.22	0.00397	0.2	Intron (ENST00000303635/ENSG00000171735, intron 5 of 22)	446	7368942	7370270	1329	1	ENSG00000237402	ENST00000427317	-26808	NA	NA	NA
5	55850920	55851675	756	*	7.8	8.04	7.52	0.52	0.00397	0.2	Promoter (<=1kb)	450	55851357	55917337	65981	1	ENSG00000164509	ENST00000652347	0	133396	IL31RA	interleukin 31 receptor A
1	154626943	154628154	1212	*	10.76	10.64	10.88	-0.23	0.00398	0.2	Promoter (<=1kb)	446	154582067	154627968	45902	2	ENSG00000160710	ENST00000368471	0	103	ADAR	adenosine deaminase RNA specific
14	68139825	68140824	1000	*	11.5	11.39	11.6	-0.21	0.00398	0.2	Intron (ENST00000479335/ENSG00000182185, intron 8 of 11)	459	68149617	68149908	292	2	ENSG00000244677	ENST00000460079	9084	NA	NA	NA
10	24762945	24763490	546	*	7.69	7.93	7.41	0.52	0.00399	0.201	Distal Intergenic	455	24583614	24723887	140274	2	ENSG00000107863	ENST00000396432	-39058	57584	ARHGAP21	Rho GTPase activating protein 21
5	179838751	179840538	1788	*	10.88	10.76	11	-0.25	0.004	0.201	Promoter (<=1kb)	450	179837143	179838255	1113	2	ENSG00000161010	ENST00000518950	-496	51149	MRNIP	MRN complex interacting protein
19	32397670	32398229	560	*	8.01	8.23	7.75	0.47	0.00402	0.201	Intron (ENST00000592680/ENSG00000267213, intron 2 of 2)	464	32405543	32413187	7645	1	ENSG00000178904	ENST00000587077	-7314	147991	DPY19L3	dpy-19 like C-mannosyltransferase 3
X	17374846	17377748	2903	*	11.84	11.74	11.93	-0.18	0.00403	0.201	Promoter (<=1kb)	468	17375200	17735994	360795	1	ENSG00000188158	ENST00000676302	0	4810	NHS	NHS actin remodeling regulator
5	58240281	58240824	544	*	8.14	8.36	7.88	0.48	0.00403	0.201	Distal Intergenic	450	58161197	58161752	556	1	ENSG00000248271	ENST00000504014	79084	NA	NA	NA
9	97689477	97690247	771	*	7.79	8.02	7.51	0.51	0.00403	0.201	Exon (ENST00000462523/ENSG00000136936, exon 3 of 7)	454	97674909	97697293	22385	2	ENSG00000136936	ENST00000462523	7046	7507	XPA	XPA, DNA damage recognition and repair factor
19	4208531	4209083	553	*	8.33	8.1	8.53	-0.43	0.00403	0.201	Promoter (<=1kb)	464	4208963	4216573	7611	1	ENSG00000089847	ENST00000595096	0	170961	ANKRD24	ankyrin repeat domain 24
5	132064678	132065719	1042	*	10.22	10.09	10.34	-0.25	0.00403	0.201	Distal Intergenic	450	132060655	132063204	2550	1	ENSG00000164399	ENST00000296870	4023	3562	IL3	interleukin 3
9	132768887	132770646	1760	*	9.99	9.86	10.11	-0.26	0.00404	0.202	Promoter (<=1kb)	454	132768965	132770212	1248	2	ENSG00000224992	ENST00000451318	0	NA	NA	NA
8	33472472	33473644	1173	*	11.05	10.94	11.15	-0.21	0.00405	0.202	Promoter (<=1kb)	453	33370824	33473146	102323	2	ENSG00000172728	ENST00000327671	0	84750	FUT10	fucosyltransferase 10
9	16246829	16247830	1002	*	8.35	8.55	8.13	0.42	0.00405	0.202	Intron (ENST00000380685/ENSG00000205549, intron 1 of 3)	454	16203947	16253114	49168	2	ENSG00000205549	ENST00000433347	5284	100129385	C9orf92	chromosome 9 open reading frame 92
2	71000827	71001687	861	*	8.92	8.73	9.09	-0.36	0.00405	0.202	Intron (ENST00000416229/ENSG00000228384, intron 1 of 1)	447	70939318	70995336	56019	2	ENSG00000258881	ENST00000606025	-5491	NA	NA	NA
20	53331337	53332170	834	*	8.65	8.83	8.44	0.39	0.00405	0.202	Intron (ENST00000371497/ENSG00000182463, intron 2 of 2)	465	53255979	53491063	235085	1	ENSG00000182463	ENST00000605656	75358	128553	TSHZ2	teashirt zinc finger homeobox 2
10	103554732	103555579	848	*	9.08	9.24	8.9	0.34	0.00406	0.202	Promoter (<=1kb)	455	103555232	103571822	16591	1	ENSG00000107954	ENST00000437579	0	9148	NEURL1	neuralized E3 ubiquitin protein ligase 1
2	150174035	150175325	1291	*	8.93	9.1	8.74	0.36	0.00407	0.202	Promoter (2-3kb)	447	150171423	150301080	129658	1	ENSG00000230645	ENST00000437118	2612	NA	NA	NA
7	115662142	115662678	537	*	7.73	7.97	7.43	0.54	0.00407	0.202	Intron (ENST00000471672/ENSG00000242072, intron 1 of 1)	452	115647461	115676329	28869	2	ENSG00000242072	ENST00000471672	13651	NA	NA	NA
4	83152562	83153225	664	*	8.09	8.3	7.84	0.45	0.00407	0.202	Distal Intergenic	449	83090806	83137075	46270	2	ENSG00000145287	ENST00000505406	-15487	51316	PLAC8	placenta associated 8
17	39244393	39245335	943	*	9.95	9.81	10.07	-0.27	0.00408	0.202	Promoter (<=1kb)	462	39243963	39250818	6856	1	ENSG00000265460	ENST00000580264	430	NA	NA	NA
1	216314471	216315193	723	*	8.06	8.28	7.8	0.48	0.00408	0.202	Intron (ENST00000307340/ENSG00000042781, intron 9 of 71)	446	216173946	216423396	249451	2	ENSG00000042781	ENST00000366942	108203	7399	USH2A	usherin
14	105020381	105022006	1626	*	11.79	11.9	11.68	0.22	0.0041	0.203	Promoter (<=1kb)	459	105009573	105021083	11511	2	ENSG00000170779	ENST00000336219	0	55038	CDCA4	cell division cycle associated 4
10	32077811	32078482	672	*	8.84	9.01	8.65	0.36	0.0041	0.203	Distal Intergenic	455	32056746	32056839	94	1	ENSG00000206660	ENST00000383933	21065	NA	NA	NA
5	102715051	102715959	909	*	9.79	9.91	9.65	0.27	0.00411	0.203	Intron (ENST00000654003/ENSG00000286338, intron 3 of 4)	450	102753981	102866282	112302	1	ENSG00000145730	ENST00000505654	-38022	5066	PAM	peptidylglycine alpha-amidating monooxygenase
X	141933829	141934733	905	*	9.68	9.54	9.82	-0.28	0.00411	0.203	Promoter (<=1kb)	468	141934496	142740581	806086	1	ENSG00000288098	ENST00000664519	0	NA	NA	NA
10	91607819	91609364	1546	*	11.06	10.96	11.16	-0.2	0.00411	0.203	Distal Intergenic	455	91628442	91633071	4630	2	ENSG00000119938	ENST00000238994	23707	5507	PPP1R3C	protein phosphatase 1 regulatory subunit 3C
3	105387054	105387882	829	*	7.88	8.11	7.62	0.48	0.00411	0.203	Intron (ENST00000306107/ENSG00000170017, intron 1 of 15)	448	105367343	105576861	209519	1	ENSG00000170017	ENST00000472644	19711	214	ALCAM	activated leukocyte cell adhesion molecule
20	36153904	36155229	1326	*	10.77	10.89	10.65	0.24	0.00412	0.203	Promoter (<=1kb)	465	36154740	36232799	78060	1	ENSG00000088367	ENST00000338074	0	2036	EPB41L1	erythrocyte membrane protein band 4.1 like 1
17	60357524	60358078	555	*	8.59	8.77	8.38	0.38	0.00412	0.203	Intron (ENST00000300896/ENSG00000170832, intron 1 of 33)	462	60301450	60391928	90479	2	ENSG00000170832	ENST00000589761	33850	84669	USP32	ubiquitin specific peptidase 32
1	81800307	81803773	3467	*	11.97	11.88	12.06	-0.18	0.00413	0.203	Promoter (<=1kb)	446	81800376	81987353	186978	1	ENSG00000117114	ENST00000674489	0	23266	ADGRL2	adhesion G protein-coupled receptor L2
8	109643792	109645544	1753	*	11.79	11.69	11.88	-0.19	0.00414	0.203	Promoter (<=1kb)	453	109573978	109644822	70845	2	ENSG00000147642	ENST00000276646	0	55638	SYBU	syntabulin
15	41547051	41547586	536	*	9.01	9.17	8.83	0.34	0.00415	0.204	Promoter (2-3kb)	460	41536163	41544269	8107	2	ENSG00000103932	ENST00000566863	-2782	26015	RPAP1	RNA polymerase II associated protein 1
X	139890859	139891739	881	*	8.64	8.82	8.44	0.38	0.00416	0.204	Intron (ENST00000370557/ENSG00000101974, intron 1 of 28)	468	139885481	139885603	123	1	ENSG00000221375	ENST00000408448	5378	NA	NA	NA
5	40808324	40808859	536	*	7.66	7.91	7.37	0.54	0.00416	0.204	Distal Intergenic	450	40762770	40798374	35605	2	ENSG00000132356	ENST00000354209	-9950	5562	PRKAA1	protein kinase AMP-activated catalytic subunit alpha 1
2	1600395	1601384	990	*	10.36	10.22	10.49	-0.27	0.00417	0.204	Intron (ENST00000438247/ENSG00000228613, intron 2 of 2)	447	1546665	1620113	73449	2	ENSG00000228613	ENST00000438247	18729	NA	NA	NA
12	6053443	6054178	736	*	8.97	9.14	8.79	0.35	0.00418	0.204	Intron (ENST00000261405/ENSG00000110799, intron 15 of 51)	457	6019528	6021926	2399	2	ENSG00000110799	ENST00000539641	-31517	7450	VWF	von Willebrand factor
10	59608566	59609275	710	*	9.52	9.36	9.66	-0.29	0.00418	0.204	Intron (ENST00000450677/ENSG00000235140, intron 3 of 3)	455	59594952	59650345	55394	1	ENSG00000235140	ENST00000644636	13614	105378318	LOC105378318	uncharacterized LOC105378318
6	96836674	96837991	1318	*	10.08	9.93	10.21	-0.28	0.00419	0.205	Promoter (<=1kb)	451	96794125	96837477	43353	2	ENSG00000112218	ENST00000229955	0	81491	GPR63	G protein-coupled receptor 63
19	46600430	46601642	1213	*	11.12	11.24	10.99	0.25	0.0042	0.205	Promoter (<=1kb)	464	46601074	46609305	8232	1	ENSG00000160014	ENST00000391918	0	808	CALM3	calmodulin 3
10	103584190	103585504	1315	*	10.95	10.84	11.06	-0.21	0.0042	0.205	Promoter (<=1kb)	455	103573157	103583687	10531	2	ENSG00000287419	ENST00000663302	-503	NA	NA	NA
10	17616478	17618005	1528	*	11.69	11.59	11.78	-0.19	0.0042	0.205	Promoter (<=1kb)	455	17589032	17617374	28343	2	ENSG00000165996	ENST00000361271	0	9200	HACD1	3-hydroxyacyl-CoA dehydratase 1
2	153166290	153167170	881	*	9.87	9.73	9.99	-0.26	0.00421	0.205	Downstream (1-2kb)	447	153158938	153159683	746	1	ENSG00000214025	ENST00000397288	7352	NA	NA	NA
7	12565080	12565727	648	*	8.69	8.88	8.48	0.4	0.00421	0.205	Distal Intergenic	452	12570577	12653104	82528	1	ENSG00000006747	ENST00000341757	-4850	85477	SCIN	scinderin
1	204377009	204378597	1589	*	10.82	10.71	10.93	-0.21	0.00421	0.205	Promoter (<=1kb)	446	204273626	204377665	104040	2	ENSG00000143850	ENST00000564627	0	22874	PLEKHA6	pleckstrin homology domain containing A6
1	201348067	201348566	500	*	8.4	8.18	8.59	-0.42	0.00422	0.205	Distal Intergenic	446	201361012	201361357	346	2	ENSG00000118194	ENST00000477035	12791	7139	TNNT2	troponin T2, cardiac type
3	107927219	107928485	1267	*	10.38	10.26	10.5	-0.24	0.00422	0.205	Promoter (<=1kb)	448	107927722	107928527	806	1	ENSG00000240423	ENST00000661824	0	285205	LINC00636	long intergenic non-protein coding RNA 636
3	775161	776175	1015	*	8.46	8.65	8.24	0.41	0.00422	0.205	Intron (ENST00000661103/ENSG00000224957, intron 3 of 3)	448	857124	858091	968	1	ENSG00000224239	ENST00000423193	-80949	NA	NA	NA
6	87472514	87473922	1409	*	11.3	11.2	11.39	-0.19	0.00422	0.205	Promoter (<=1kb)	451	87472925	87512330	39406	1	ENSG00000164414	ENST00000369556	0	10559	SLC35A1	solute carrier family 35 member A1
5	112418495	112420649	2155	*	12.08	11.99	12.17	-0.18	0.00423	0.205	Promoter (<=1kb)	450	112162619	112419277	256659	2	ENSG00000129595	ENST00000261486	0	64097	EPB41L4A	erythrocyte membrane protein band 4.1 like 4A
7	1668454	1668908	455	*	8.55	8.33	8.74	-0.41	0.00423	0.205	Distal Intergenic	452	1688119	1747954	59836	1	ENSG00000225968	ENST00000424383	-19211	392617	ELFN1	extracellular leucine rich repeat and fibronectin type III domain containing 1
1	206909100	206910138	1039	*	11.19	11.09	11.29	-0.2	0.00425	0.205	Promoter (<=1kb)	446	206904525	206909945	5421	2	ENSG00000162894	ENST00000474041	0	9214	FCMR	Fc fragment of IgM receptor
5	118987792	118989038	1247	*	12.2	12.11	12.29	-0.18	0.00426	0.205	Promoter (<=1kb)	450	118836074	118988547	152474	2	ENSG00000169570	ENST00000510708	0	285605	DTWD2	DTW domain containing 2
17	81294581	81296387	1807	*	11.43	11.32	11.53	-0.21	0.00426	0.205	Promoter (<=1kb)	462	81244811	81295307	50497	2	ENSG00000157637	ENST00000374759	0	124565	SLC38A10	solute carrier family 38 member 10
3	126134165	126134505	341	*	7.77	7.49	8.01	-0.52	0.00426	0.205	Intron (ENST00000455064/ENSG00000144908, intron 12 of 21)	448	126103573	126115502	11930	2	ENSG00000144908	ENST00000467370	-18663	10840	ALDH1L1	aldehyde dehydrogenase 1 family member L1
13	101489699	101490994	1296	*	8.75	8.93	8.56	0.37	0.00426	0.205	Promoter (<=1kb)	458	101489952	101716443	226492	1	ENSG00000198542	ENST00000376162	0	9358	ITGBL1	integrin subunit beta like 1
8	122572164	122572651	488	*	8.12	7.87	8.34	-0.47	0.00426	0.205	Intron (ENST00000664854/ENSG00000253819, intron 3 of 3)	453	122485515	122489815	4301	2	ENSG00000255325	ENST00000530350	-82349	NA	NA	NA
15	85494178	85494916	739	*	9.38	9.54	9.2	0.34	0.00428	0.206	Intron (ENST00000559362/ENSG00000170776, intron 2 of 14)	460	85544040	85579184	35145	1	ENSG00000170776	ENST00000558166	-49124	11214	AKAP13	A-kinase anchoring protein 13
12	69527617	69528372	756	*	9.03	9.19	8.85	0.34	0.00429	0.206	Intron (ENST00000547219/ENSG00000166225, intron 2 of 6)	457	69557789	69579789	22001	1	ENSG00000166225	ENST00000397997	-29417	10818	FRS2	fibroblast growth factor receptor substrate 2
4	46441168	46441810	643	*	7.95	8.19	7.68	0.51	0.00429	0.206	Intron (ENST00000651612/ENSG00000249330, intron 2 of 4)	449	46248427	46475230	226804	2	ENSG00000151834	ENST00000510861	33420	2555	GABRA2	gamma-aminobutyric acid type A receptor alpha2 subunit
7	119254680	119255252	573	*	7.83	8.06	7.56	0.5	0.0043	0.206	Distal Intergenic	452	119178177	119179149	973	2	ENSG00000270516	ENST00000605356	-75531	NA	NA	NA
X	131841234	131842427	1194	*	9.78	9.63	9.91	-0.28	0.0043	0.206	Distal Intergenic	468	131823764	131830862	7099	2	ENSG00000213468	ENST00000657242	-10372	286467	FIRRE	firre intergenic repeating RNA element
19	15555694	15556942	1249	*	10.66	10.55	10.77	-0.22	0.0043	0.206	Distal Intergenic	464	15564074	15584709	20636	1	ENSG00000269516	ENST00000593402	-7132	NA	NA	NA
20	25584634	25585864	1231	*	10.27	10.14	10.39	-0.25	0.00431	0.206	Promoter (<=1kb)	465	25452697	25585531	132835	2	ENSG00000101004	ENST00000278886	0	22981	NINL	ninein like
X	155611952	155613292	1341	*	10.36	10.23	10.48	-0.25	0.00431	0.206	Promoter (<=1kb)	468	155612572	155738214	125643	1	ENSG00000168939	ENST00000676089	0	10251	SPRY3	sprouty RTK signaling antagonist 3
18	9709457	9709976	520	*	8.73	8.52	8.91	-0.39	0.00432	0.206	Promoter (1-2kb)	463	9708323	9758151	49829	1	ENSG00000168461	ENST00000583137	1134	11031	RAB31	RAB31, member RAS oncogene family
16	19413189	19413782	594	*	8.8	8.98	8.59	0.39	0.00432	0.206	Promoter (1-2kb)	461	19410729	19411662	934	2	ENSG00000260681	ENST00000568635	-1527	NA	NA	NA
8	37599744	37600217	474	*	8.73	8.53	8.91	-0.37	0.00433	0.206	Promoter (<=1kb)	453	37597480	37599858	2379	2	ENSG00000254290	ENST00000519691	0	NA	NA	NA
14	73785229	73786397	1169	*	11.21	11.11	11.3	-0.19	0.00433	0.206	Promoter (<=1kb)	459	73715122	73787258	72137	2	ENSG00000156030	ENST00000394071	861	91748	ELMSAN1	ELM2 and Myb/SANT domain containing 1
12	22974860	22975274	415	*	8.31	8.51	8.09	0.42	0.00433	0.206	Intron (ENST00000538317/ENSG00000256995, intron 6 of 11)	457	22964579	23174141	209563	1	ENSG00000256995	ENST00000625240	10281	NA	NA	NA
17	50782982	50783682	701	*	9.41	9.25	9.56	-0.3	0.00434	0.206	Promoter (1-2kb)	462	50781306	50792493	11188	1	ENSG00000285829	ENST00000648357	1676	NA	NA	NA
2	113755635	113757216	1582	*	11.34	11.24	11.43	-0.2	0.00434	0.206	Promoter (<=1kb)	447	113706709	113756642	49934	2	ENSG00000115084	ENST00000245680	0	80255	SLC35F5	solute carrier family 35 member F5
8	140727262	140727762	501	*	9.61	9.74	9.46	0.28	0.00435	0.206	Intron (ENST00000522684/ENSG00000169398, intron 22 of 31)	453	140732564	140732653	90	2	ENSG00000254324	ENST00000521276	4891	442893	MIR151A	microRNA 151a
3	71989107	71989606	500	*	7.84	8.07	7.57	0.5	0.00435	0.206	Intron (ENST00000666244/ENSG00000241163, intron 5 of 6)	448	72006774	72006975	202	1	ENSG00000244130	ENST00000490086	-17168	NA	NA	NA
19	994936	996820	1885	*	12.04	11.95	12.13	-0.18	0.00436	0.206	Promoter (<=1kb)	464	994014	994554	541	1	ENSG00000065268	ENST00000591155	922	57418	WDR18	WD repeat domain 18
1	111738378	111740024	1647	*	12.08	11.98	12.18	-0.19	0.00436	0.206	Promoter (<=1kb)	446	111680630	111739403	58774	2	ENSG00000197852	ENST00000527570	0	55924	INKA2	inka box actin regulator 2
4	74554966	74555639	674	*	9.02	9.2	8.8	0.4	0.00436	0.206	Intron (ENST00000510419/ENSG00000249942, intron 5 of 5)	449	74552584	74589481	36898	2	ENSG00000249942	ENST00000510419	33842	NA	NA	NA
5	149999982	150002073	2092	*	12.07	11.97	12.17	-0.2	0.00437	0.206	Promoter (<=1kb)	450	150000046	150053142	53097	1	ENSG00000113716	ENST00000613459	0	22993	HMGXB3	HMG-box containing 3
8	8258453	8258952	500	*	9.16	9.31	8.99	0.32	0.00437	0.206	Distal Intergenic	453	8237674	8244667	6994	2	ENSG00000253981	ENST00000523017	-13786	NA	NA	NA
4	80069118	80069437	320	*	8.2	8.41	7.96	0.45	0.00437	0.206	Promoter (2-3kb)	449	79905571	80071620	166050	2	ENSG00000163297	ENST00000449651	2183	118429	ANTXR2	ANTXR cell adhesion molecule 2
5	132002043	132002611	569	*	8.12	8.33	7.88	0.45	0.00437	0.206	Promoter (<=1kb)	450	131989450	132001881	12432	2	ENSG00000164398	ENST00000416557	-162	23305	ACSL6	acyl-CoA synthetase long chain family member 6
19	9791539	9792999	1461	*	10.99	11.1	10.87	0.23	0.00438	0.206	Promoter (<=1kb)	464	9759873	9793097	33225	2	ENSG00000196605	ENST00000592587	98	162993	ZNF846	zinc finger protein 846
9	134863741	134864742	1002	*	11.22	11.12	11.32	-0.19	0.00438	0.206	Distal Intergenic	454	134868236	134868475	240	1	ENSG00000232355	ENST00000412680	-3494	NA	NA	NA
12	26704689	26705444	756	*	8.39	8.58	8.17	0.42	0.00439	0.207	Intron (ENST00000381340/ENSG00000123104, intron 9 of 56)	457	26695602	26715728	20127	2	ENSG00000123104	ENST00000540791	10284	3709	ITPR2	inositol 1,4,5-trisphosphate receptor type 2
4	186725854	186727161	1308	*	11.38	11.28	11.48	-0.2	0.00439	0.207	Promoter (<=1kb)	449	186708363	186726722	18360	2	ENSG00000083857	ENST00000509647	0	2195	FAT1	FAT atypical cadherin 1
1	101592793	101593443	651	*	9.16	9.31	8.99	0.32	0.00439	0.207	Distal Intergenic	446	101639509	101729536	90028	1	ENSG00000226715	ENST00000668955	-46066	NA	NA	NA
7	32102239	32103044	806	*	10.18	10.05	10.29	-0.25	0.00439	0.207	Intron (ENST00000396193/ENSG00000154678, intron 3 of 18)	452	31873332	32078010	204679	2	ENSG00000154678	ENST00000464881	-24229	5137	PDE1C	phosphodiesterase 1C
5	172855526	172856306	781	*	11.07	10.96	11.18	-0.22	0.0044	0.207	Intron (ENST00000393784/ENSG00000113719, intron 1 of 9)	450	172834411	172920571	86161	1	ENSG00000113719	ENST00000523291	21115	57222	ERGIC1	endoplasmic reticulum-golgi intermediate compartment 1
8	52940635	52941997	1363	*	11.16	11.05	11.26	-0.2	0.0044	0.207	Promoter (1-2kb)	453	52939182	52943734	4553	1	ENSG00000288611	ENST00000674939	1453	NA	NA	NA
18	23688983	23690469	1487	*	10.83	10.72	10.94	-0.22	0.00441	0.207	Promoter (<=1kb)	463	23689453	23955066	265614	1	ENSG00000053747	ENST00000313654	0	3909	LAMA3	laminin subunit alpha 3
1	47709327	47711055	1729	*	10.43	10.31	10.54	-0.23	0.00442	0.207	Distal Intergenic	446	47688463	47704029	15567	1	ENSG00000227947	ENST00000454285	20864	107984953	LINC01738	long intergenic non-protein coding RNA 1738
15	77908087	77908904	818	*	10.54	10.42	10.65	-0.23	0.00444	0.208	Distal Intergenic	460	77901661	77904361	2701	1	ENSG00000260139	ENST00000565545	6426	NA	NA	NA
7	138890541	138891944	1404	*	11.98	11.89	12.07	-0.18	0.00444	0.208	Intron (ENST00000440172/ENSG00000122778, intron 10 of 19)	452	138876359	138876465	107	2	ENSG00000199646	ENST00000362776	-14076	NA	NA	NA
2	97112374	97114081	1708	*	11.25	11.15	11.35	-0.2	0.00444	0.208	Promoter (<=1kb)	447	97113153	97264521	151369	1	ENSG00000135976	ENST00000420699	0	375248	ANKRD36	ankyrin repeat domain 36
17	62965721	62967167	1447	*	11.05	11.16	10.94	0.22	0.00446	0.208	Promoter (<=1kb)	462	62910021	62966583	56563	2	ENSG00000283538	ENST00000650312	0	NA	NA	NA
6	113432954	113434064	1111	*	10.1	9.97	10.23	-0.26	0.00446	0.208	Promoter (<=1kb)	451	113428540	113433421	4882	2	ENSG00000232316	ENST00000421737	0	105377957	LINC02518	long intergenic non-protein coding RNA 2518
5	143515784	143516661	878	*	10.01	9.88	10.13	-0.25	0.00446	0.208	Intron (ENST00000340585/ENSG00000249429, intron 1 of 1)	450	143531331	143559507	28177	1	ENSG00000251205	ENST00000661034	-14670	105378208	LOC105378208	uncharacterized LOC105378208
19	6601679	6602243	565	*	8.44	8.63	8.21	0.43	0.00446	0.208	Promoter (1-2kb)	464	6590103	6604103	14001	2	ENSG00000125726	ENST00000597430	1860	970	CD70	CD70 molecule
19	6412149	6412907	759	*	7.99	7.74	8.21	-0.47	0.00446	0.208	Promoter (2-3kb)	464	6413641	6415448	1808	2	ENSG00000088247	ENST00000597656	2541	8570	KHSRP	KH-type splicing regulatory protein
1	210328509	210329707	1199	*	10.35	10.22	10.47	-0.25	0.00447	0.208	Promoter (<=1kb)	446	210328902	210676290	347389	1	ENSG00000054392	ENST00000261458	0	55733	HHAT	hedgehog acyltransferase
4	122898307	122899069	763	*	10.22	10.33	10.09	0.24	0.00447	0.208	Intron (ENST00000512116/ENSG00000170917, intron 3 of 4)	449	122888697	122892688	3992	2	ENSG00000170917	ENST00000608639	-5619	11162	NUDT6	nudix hydrolase 6
17	3976435	3977704	1270	*	10.97	10.87	11.07	-0.2	0.00449	0.208	Promoter (<=1kb)	462	3977103	3981899	4797	1	ENSG00000263312	ENST00000571890	0	NA	NA	NA
18	13710306	13711102	797	*	9.01	9.17	8.83	0.35	0.00449	0.208	Promoter (<=1kb)	463	13710249	13710484	236	2	ENSG00000279962	ENST00000624611	0	NA	NA	NA
2	239916667	239917778	1112	*	8.86	9.05	8.65	0.4	0.00449	0.208	Intron (ENST00000419408/ENSG00000130414, intron 4 of 5)	447	239943015	239943094	80	2	ENSG00000264279	ENST00000583954	25316	100616417	MIR4786	microRNA 4786
4	116838502	116839171	670	*	9.55	9.7	9.4	0.3	0.00452	0.209	Promoter (<=1kb)	449	116839279	116839385	107	1	ENSG00000201752	ENST00000364882	-108	NA	NA	NA
21	15616949	15617564	616	*	8.59	8.77	8.39	0.39	0.00452	0.209	Promoter (2-3kb)	466	15614283	15614389	107	1	ENSG00000212564	ENST00000391262	2666	NA	NA	NA
17	44794785	44795769	985	*	8.78	8.95	8.58	0.36	0.00452	0.209	Promoter (1-2kb)	462	44793199	44794474	1276	1	ENSG00000267505	ENST00000585620	1586	NA	NA	NA
8	144019163	144020820	1658	*	10.39	10.27	10.5	-0.24	0.00452	0.209	Intron (ENST00000377470/ENSG00000186583, intron 1 of 4)	453	143985891	144012772	26882	2	ENSG00000178685	ENST00000530478	-6391	84875	PARP10	poly(ADP-ribose) polymerase family member 10
5	118984596	118985193	598	*	9.37	9.51	9.21	0.31	0.00453	0.209	Intron (ENST00000510708/ENSG00000169570, intron 1 of 5)	450	118837322	118988220	150899	2	ENSG00000169570	ENST00000304058	3027	285605	DTWD2	DTW domain containing 2
1	77281576	77283036	1461	*	10.54	10.42	10.65	-0.23	0.00453	0.209	Promoter (<=1kb)	446	77282019	77559966	277948	1	ENSG00000154027	ENST00000354567	0	26289	AK5	adenylate kinase 5
6	160930492	160931557	1066	*	9.24	9.06	9.39	-0.33	0.00453	0.209	Promoter (<=1kb)	451	160931080	160984321	53242	1	ENSG00000231863	ENST00000417479	0	NA	NA	NA
12	91023211	91023921	711	*	8.56	8.74	8.35	0.38	0.00455	0.21	Distal Intergenic	457	90971800	91005026	33227	2	ENSG00000083782	ENST00000551767	-18185	1833	EPYC	epiphycan
2	164980809	164981980	1172	*	9.45	9.59	9.3	0.29	0.00456	0.21	Intron (ENST00000670672/ENSG00000236283, intron 7 of 7)	447	164991984	165091293	99310	1	ENSG00000236283	ENST00000431341	-10004	NA	NA	NA
13	38202584	38203178	595	*	8.46	8.64	8.25	0.4	0.00457	0.21	Intron (ENST00000451826/ENSG00000223685, intron 2 of 7)	458	38050817	38143232	92416	2	ENSG00000223685	ENST00000434565	-59352	100874188	LINC00571	long intergenic non-protein coding RNA 571
12	79684849	79685623	775	*	9.78	9.92	9.64	0.28	0.00457	0.21	Intron (ENST00000328827/ENSG00000177425, intron 2 of 6)	457	79667979	79690030	22052	2	ENSG00000177425	ENST00000547571	4407	5074	PAWR	pro-apoptotic WT1 regulator
5	27510941	27511563	623	*	10.47	10.58	10.35	0.24	0.00458	0.211	Distal Intergenic	450	27493359	27496404	3046	1	ENSG00000250337	ENST00000671061	17582	643401	PURPL	p53 upregulated regulator of p53 levels
5	39137894	39138473	580	*	7.73	7.96	7.45	0.51	0.00459	0.211	Promoter (1-2kb)	450	39137404	39140030	2627	2	ENSG00000082074	ENST00000644817	1557	2533	FYB1	FYN binding protein 1
3	152834491	152836080	1590	*	11.16	11.05	11.26	-0.21	0.00459	0.211	Promoter (<=1kb)	448	152835131	152841439	6309	1	ENSG00000169860	ENST00000305097	0	5028	P2RY1	purinergic receptor P2Y1
2	181656375	181657371	997	*	11.07	10.96	11.17	-0.21	0.00459	0.211	Promoter (<=1kb)	447	181536672	181657105	120434	2	ENSG00000188452	ENST00000410087	0	375298	CERKL	ceramide kinase like
18	60892375	60893564	1190	*	9.72	9.85	9.57	0.28	0.0046	0.211	Intron (ENST00000655645/ENSG00000267098, intron 1 of 6)	463	60628963	60902715	273753	2	ENSG00000267098	ENST00000655645	9151	NA	NA	NA
7	140478469	140479898	1430	*	11.41	11.3	11.51	-0.21	0.00461	0.211	Promoter (<=1kb)	452	140453033	140479505	26473	2	ENSG00000133606	ENST00000255977	0	23608	MKRN1	makorin ring finger protein 1
6	72552997	72554599	1603	*	9.41	9.55	9.25	0.3	0.00461	0.211	Distal Intergenic	451	72522641	72523238	598	1	ENSG00000217483	ENST00000405153	30356	NA	NA	NA
17	8079262	8080528	1267	*	10.67	10.55	10.78	-0.22	0.00461	0.211	Promoter (<=1kb)	462	8072720	8079903	7184	2	ENSG00000179477	ENST00000649809	0	242	ALOX12B	arachidonate 12-lipoxygenase, 12R type
9	27094529	27095248	720	*	9.88	10.01	9.73	0.27	0.00461	0.211	Distal Intergenic	454	27102630	27104728	2099	1	ENSG00000254396	ENST00000522960	-7382	NA	NA	NA
X	16828020	16828803	784	*	9.83	9.68	9.97	-0.29	0.00461	0.211	Exon (ENST00000398155/ENSG00000086712, exon 2 of 8)	468	16839837	16844519	4683	1	ENSG00000086712	ENST00000485153	-11034	55787	TXLNG	taxilin gamma
5	158942689	158943618	930	*	10.12	10.24	9.99	0.25	0.00463	0.211	Intron (ENST00000519890/ENSG00000164330, intron 2 of 11)	450	158983006	158984789	1784	1	ENSG00000253811	ENST00000522582	-39388	NA	NA	NA
1	86155169	86156870	1702	*	9.61	9.46	9.75	-0.3	0.00463	0.211	Promoter (<=1kb)	446	85729233	86156772	427540	2	ENSG00000171502	ENST00000370571	0	255631	COL24A1	collagen type XXIV alpha 1 chain
7	23712986	23713538	553	*	8.98	9.14	8.8	0.34	0.00463	0.211	Promoter (2-3kb)	452	23710378	23729116	18739	1	ENSG00000196335	ENST00000444333	2608	56164	STK31	serine/threonine kinase 31
17	2054550	2055622	1073	*	10.47	10.34	10.59	-0.25	0.00463	0.211	Promoter (<=1kb)	462	2055099	2059686	4588	1	ENSG00000177374	ENST00000399849	0	3090	HIC1	HIC ZBTB transcriptional repressor 1
12	1706273	1707239	967	*	8.12	8.33	7.88	0.45	0.00464	0.211	Intron (ENST00000537545/ENSG00000006831, intron 1 of 2)	457	1695830	1698044	2215	2	ENSG00000271500	ENST00000603687	-8229	NA	NA	NA
8	32271309	32271839	531	*	7.95	8.16	7.69	0.47	0.00465	0.211	Intron (ENST00000519301/ENSG00000157168, intron 1 of 10)	453	32256496	32256623	128	1	ENSG00000200246	ENST00000363376	14813	NA	NA	NA
2	208872337	208872981	645	*	7.92	8.14	7.66	0.48	0.00466	0.212	Distal Intergenic	447	208885755	208888143	2389	1	ENSG00000287662	ENST00000666011	-12774	NA	NA	NA
X	40107268	40109448	2181	*	11.5	11.4	11.6	-0.2	0.00466	0.212	Intron (ENST00000378455/ENSG00000183337, intron 1 of 13)	468	40074683	40097979	23297	2	ENSG00000183337	ENST00000672922	-9289	54880	BCOR	BCL6 corepressor
14	104149625	104150636	1012	*	10.56	10.44	10.67	-0.23	0.00467	0.212	Intron (ENST00000423312/ENSG00000066735, intron 2 of 14)	459	104139040	104180894	41855	1	ENSG00000066735	ENST00000315264	10585	26153	KIF26A	kinesin family member 26A
5	92519698	92520352	655	*	8.53	8.73	8.3	0.42	0.00468	0.212	Intron (ENST00000512210/ENSG00000249776, intron 2 of 3)	450	92553443	92560033	6591	2	ENSG00000249776	ENST00000512284	39681	NA	NA	NA
19	11418587	11419585	999	*	10.4	10.28	10.52	-0.24	0.00468	0.212	Promoter (<=1kb)	464	11384341	11419273	34933	2	ENSG00000205517	ENST00000562663	0	57139	RGL3	ral guanine nucleotide dissociation stimulator like 3
7	6104197	6105703	1507	*	11.75	11.84	11.65	0.19	0.00469	0.212	Promoter (<=1kb)	452	6104884	6161564	56681	1	ENSG00000106346	ENST00000306177	0	84132	USP42	ubiquitin specific peptidase 42
5	72234188	72234814	627	*	8.69	8.87	8.49	0.38	0.0047	0.212	Exon (ENST00000261413/ENSG00000113048, exon 6 of 11)	450	72223803	72238130	14328	2	ENSG00000113048	ENST00000522562	3316	23107	MRPS27	mitochondrial ribosomal protein S27
1	218487668	218488431	764	*	8.91	9.08	8.72	0.36	0.00471	0.212	Intron (ENST00000663551/ENSG00000228208, intron 1 of 2)	446	218494822	218525976	31155	1	ENSG00000228208	ENST00000668967	-6391	440714	C1orf143	chromosome 1 open reading frame 143 (putative)
5	39543278	39543997	720	*	8.65	8.83	8.45	0.38	0.00471	0.212	Distal Intergenic	450	39520416	39524708	4293	1	ENSG00000271334	ENST00000604954	22862	101926940	LINC02104	long intergenic non-protein coding RNA 2104
12	70815818	70816526	709	*	7.74	7.98	7.44	0.54	0.00472	0.212	Intron (ENST00000283228/ENSG00000153233, intron 2 of 13)	457	70638931	70788982	150052	2	ENSG00000153233	ENST00000342084	-26836	5801	PTPRR	protein tyrosine phosphatase receptor type R
1	209900611	209901284	674	*	8.93	9.09	8.75	0.34	0.00472	0.212	Promoter (<=1kb)	446	209900923	209952756	51834	1	ENSG00000143469	ENST00000652023	0	255928	SYT14	synaptotagmin 14
7	83524150	83524979	830	*	8.49	8.69	8.27	0.42	0.00472	0.212	Intron (ENST00000643230/ENSG00000170381, intron 1 of 16)	452	83407140	83462160	55021	2	ENSG00000170381	ENST00000644381	-61990	9723	SEMA3E	semaphorin 3E
3	72446540	72447885	1346	*	10.8	10.9	10.69	0.21	0.00473	0.212	Promoter (<=1kb)	448	72371825	72446623	74799	2	ENSG00000163602	ENST00000477973	0	23429	RYBP	RING1 and YY1 binding protein
4	89497601	89498484	884	*	9.21	9.36	9.05	0.32	0.00473	0.212	Intron (ENST00000659878/ENSG00000251095, intron 1 of 2)	449	89490949	89686449	195501	1	ENSG00000251095	ENST00000659714	6652	NA	NA	NA
5	170521942	170523662	1721	*	12.41	12.32	12.5	-0.18	0.00473	0.212	Intron (ENST00000377360/ENSG00000182132, intron 1 of 7)	450	170504573	170735806	231234	1	ENSG00000182132	ENST00000434108	17369	30820	KCNIP1	potassium voltage-gated channel interacting protein 1
14	104768357	104769309	953	*	10.05	9.92	10.17	-0.25	0.00473	0.212	Promoter (<=1kb)	459	104769349	104770271	923	1	ENSG00000258430	ENST00000557223	-40	NA	NA	NA
4	26483745	26484795	1051	*	10.36	10.24	10.47	-0.23	0.00473	0.212	Intron (ENST00000295589/ENSG00000163394, intron 3 of 4)	449	26481396	26490484	9089	2	ENSG00000163394	ENST00000295589	5689	886	CCKAR	cholecystokinin A receptor
19	12801057	12802572	1516	*	11.43	11.33	11.53	-0.21	0.00473	0.212	Promoter (<=1kb)	464	12796820	12801787	4968	2	ENSG00000167815	ENST00000334482	0	7001	PRDX2	peroxiredoxin 2
15	40054518	40055913	1396	*	11.75	11.66	11.84	-0.18	0.00474	0.212	Intron (ENST00000559012/ENSG00000248508, intron 2 of 6)	460	40039349	40057000	17652	1	ENSG00000248508	ENST00000560341	15169	100131089	SRP14-AS1	SRP14 antisense RNA1 (head to head)
12	8081754	8082832	1079	*	10.9	10.79	11	-0.21	0.00474	0.212	Promoter (<=1kb)	457	8081895	8097740	15846	1	ENSG00000089818	ENST00000640648	0	25977	NECAP1	NECAP endocytosis associated 1
4	2219862	2220664	803	*	8.78	8.58	8.96	-0.37	0.00475	0.212	Intron (ENST00000382865/ENSG00000130997, intron 1 of 23)	449	2071918	2229231	157314	2	ENSG00000130997	ENST00000382865	8567	353497	POLN	DNA polymerase nu
17	76725819	76727486	1668	*	12.22	12.12	12.31	-0.2	0.00475	0.212	Promoter (<=1kb)	462	76712832	76726679	13848	2	ENSG00000070495	ENST00000445478	0	23210	JMJD6	jumonji domain containing 6, arginine demethylase and lysine hydroxylase
1	193281371	193282588	1218	*	8.77	8.94	8.57	0.37	0.00478	0.214	Distal Intergenic	446	193304745	193365953	61209	1	ENSG00000232077	ENST00000420807	-22157	101929184	LINC01031	long intergenic non-protein coding RNA 1031
6	166009639	166011079	1441	*	11.26	11.17	11.36	-0.19	0.0048	0.214	Distal Intergenic	451	165711019	165988078	277060	2	ENSG00000112541	ENST00000649882	-21561	10846	PDE10A	phosphodiesterase 10A
9	34203755	34204548	794	*	8.86	9.02	8.67	0.35	0.0048	0.214	Promoter (1-2kb)	454	34206134	34206241	108	2	ENSG00000252164	ENST00000516355	1693	NA	NA	NA
4	2008468	2010157	1690	*	11.07	10.95	11.18	-0.23	0.0048	0.214	Promoter (<=1kb)	449	1982717	2009235	26519	2	ENSG00000185049	ENST00000542778	0	7469	NELFA	negative elongation factor complex member A
9	6931625	6932453	829	*	10.01	10.13	9.88	0.25	0.00481	0.214	Intron (ENST00000536108/ENSG00000107077, intron 8 of 17)	454	6925501	7175347	249847	1	ENSG00000107077	ENST00000428870	6124	23081	KDM4C	lysine demethylase 4C
16	68529687	68530717	1031	*	9.89	9.75	10.02	-0.27	0.00481	0.214	Promoter (<=1kb)	461	68530090	68558105	28016	1	ENSG00000184939	ENST00000576305	0	146198	ZFP90	ZFP90 zinc finger protein
12	10182467	10183117	651	*	8.8	8.96	8.61	0.36	0.00481	0.214	Exon (ENST00000381923/ENSG00000165685, exon 3 of 6)	457	10179303	10186552	7250	1	ENSG00000165685	ENST00000543484	3164	120939	TMEM52B	transmembrane protein 52B
6	52724456	52724966	511	*	7.68	7.39	7.92	-0.52	0.00481	0.214	Distal Intergenic	451	52739590	52744656	5067	2	ENSG00000237674	ENST00000438425	19690	NA	NA	NA
16	31507531	31508877	1347	*	10.79	10.68	10.89	-0.21	0.00482	0.214	Promoter (<=1kb)	461	31489471	31508391	18921	2	ENSG00000140688	ENST00000570164	0	64755	C16orf58	chromosome 16 open reading frame 58
5	33068659	33069228	570	*	9.57	9.72	9.42	0.3	0.00482	0.214	Intron (ENST00000657441/ENSG00000250697, intron 1 of 1)	450	32965727	33049422	83696	2	ENSG00000250697	ENST00000505339	-19237	NA	NA	NA
9	21450733	21451342	610	*	8.69	8.87	8.49	0.39	0.00482	0.214	Downstream (2-3kb)	454	21455484	21456049	566	1	ENSG00000238271	ENST00000438727	-4142	NA	NA	NA
19	4525136	4525623	488	*	7.97	7.72	8.19	-0.47	0.00482	0.214	Promoter (<=1kb)	464	4523909	4525849	1941	2	ENSG00000214456	ENST00000589728	226	440503	PLIN5	perilipin 5
10	19749097	19750076	980	*	8.94	9.1	8.76	0.34	0.00483	0.214	Promoter (1-2kb)	455	19747823	19748621	799	1	ENSG00000230818	ENST00000419987	1274	NA	NA	NA
9	34158381	34158968	588	*	10.11	10.23	9.99	0.25	0.00484	0.214	Distal Intergenic	454	34179005	34251850	72846	1	ENSG00000165006	ENST00000625521	-20037	51271	UBAP1	ubiquitin associated protein 1
2	217223276	217223877	602	*	8.18	8.38	7.95	0.43	0.00484	0.214	Distal Intergenic	447	217251556	217251875	320	1	ENSG00000251982	ENST00000516173	-27679	NA	NA	NA
12	32920437	32920928	492	*	8.84	9.01	8.66	0.35	0.00485	0.214	Distal Intergenic	457	32790755	32896777	106023	2	ENSG00000057294	ENST00000340811	-23660	5318	PKP2	plakophilin 2
12	76105498	76106125	628	*	7.68	7.92	7.4	0.52	0.00485	0.214	Distal Intergenic	457	76115711	76116100	390	1	ENSG00000258304	ENST00000552852	-9586	NA	NA	NA
3	70824090	70825185	1096	*	10	10.12	9.86	0.25	0.00487	0.214	Distal Intergenic	448	70808350	70808452	103	1	ENSG00000206939	ENST00000384212	15740	NA	NA	NA
17	28133298	28134082	785	*	8.05	8.27	7.8	0.46	0.00487	0.214	Intron (ENST00000407008/ENSG00000087095, intron 3 of 10)	462	28116239	28116406	168	2	ENSG00000240873	ENST00000472363	-16892	NA	NA	NA
6	107600936	107601485	550	*	9.12	9.28	8.95	0.33	0.00487	0.214	Intron (ENST00000317357/ENSG00000112320, intron 5 of 6)	451	107634990	107636316	1327	1	ENSG00000112320	ENST00000494935	-33505	55084	SOBP	sine oculis binding protein homolog
17	74987372	74989010	1639	*	11.64	11.53	11.74	-0.21	0.00487	0.214	Promoter (<=1kb)	462	74987632	75005800	18169	1	ENSG00000109089	ENST00000337231	0	30850	CDR2L	cerebellar degeneration related protein 2 like
1	246565820	246567142	1323	*	12.31	12.22	12.39	-0.17	0.00488	0.214	Promoter (<=1kb)	446	246540561	246566261	25701	2	ENSG00000162851	ENST00000366514	0	64216	TFB2M	transcription factor B2, mitochondrial
5	39650306	39651017	712	*	10.66	10.76	10.54	0.22	0.00488	0.214	Distal Intergenic	450	39718984	39721513	2530	2	ENSG00000250492	ENST00000504674	70496	NA	NA	NA
19	3358958	3359757	800	*	9.61	9.76	9.46	0.3	0.00489	0.214	Promoter (<=1kb)	464	3359563	3469217	109655	1	ENSG00000141905	ENST00000589123	0	4782	NFIC	nuclear factor I C
19	8505669	8506881	1213	*	10.84	10.73	10.93	-0.21	0.00489	0.214	Downstream (2-3kb)	464	8490056	8502640	12585	2	ENSG00000133246	ENST00000423345	-3029	84106	PRAM1	PML-RARA regulated adaptor molecule 1
10	37856944	37858465	1522	*	11.43	11.33	11.52	-0.19	0.00489	0.214	Promoter (<=1kb)	455	37776526	37857197	80672	2	ENSG00000198105	ENST00000615949	0	57209	ZNF248	zinc finger protein 248
3	129398731	129399936	1206	*	9.88	9.74	10.01	-0.27	0.0049	0.215	Promoter (<=1kb)	448	129382922	129399405	16484	2	ENSG00000251474	ENST00000510078	0	132241	RPL32P3	ribosomal protein L32 pseudogene 3
3	79999925	80000632	708	*	7.84	8.06	7.58	0.48	0.00491	0.215	Distal Intergenic	448	79957566	79958142	577	2	ENSG00000243877	ENST00000490557	-41783	NA	NA	NA
5	27328454	27328947	494	*	7.73	7.97	7.45	0.52	0.00491	0.215	Intron (ENST00000650981/ENSG00000250337, intron 2 of 9)	450	27406530	27436421	29892	2	ENSG00000248490	ENST00000510512	107474	NA	NA	NA
2	127810251	127811692	1442	*	10.98	10.88	11.08	-0.2	0.00492	0.215	Promoter (<=1kb)	447	127701027	127811171	110145	2	ENSG00000136709	ENST00000322313	0	55339	WDR33	WD repeat domain 33
2	208711371	208712198	828	*	8.68	8.88	8.46	0.42	0.00492	0.215	Intron (ENST00000419079/ENSG00000144407, intron 4 of 6)	447	208838363	208854503	16141	1	ENSG00000144407	ENST00000487472	-126165	5746	PTH2R	parathyroid hormone 2 receptor
7	32204049	32204938	890	*	10.28	10.15	10.39	-0.24	0.00492	0.215	Intron (ENST00000396193/ENSG00000154678, intron 2 of 18)	452	31751179	32299329	548151	2	ENSG00000154678	ENST00000396193	94391	5137	PDE1C	phosphodiesterase 1C
1	6859774	6860870	1097	*	9.56	9.69	9.41	0.29	0.00493	0.215	Intron (ENST00000490738/ENSG00000171735, intron 2 of 2)	446	6853095	6872045	18951	1	ENSG00000171735	ENST00000472283	6679	23261	CAMTA1	calmodulin binding transcription activator 1
10	124791065	124792563	1499	*	11.23	11.13	11.33	-0.19	0.00494	0.215	Promoter (<=1kb)	455	124756254	124791887	35634	2	ENSG00000203791	ENST00000652548	0	399818	EEF1AKMT2	EEF1A lysine methyltransferase 2
12	58919268	58920818	1551	*	11.17	11.06	11.26	-0.2	0.00494	0.215	Promoter (<=1kb)	457	58872149	58919546	47398	2	ENSG00000139263	ENST00000379141	0	121227	LRIG3	leucine rich repeats and immunoglobulin like domains 3
5	24566934	24567533	600	*	8.08	8.29	7.83	0.46	0.00494	0.215	Intron (ENST00000510391/ENSG00000251294, intron 1 of 2)	450	24578294	24578561	268	2	ENSG00000249562	ENST00000506658	11028	NA	NA	NA
7	55254510	55256012	1503	*	11.74	11.65	11.83	-0.18	0.00495	0.215	Promoter (<=1kb)	452	55235965	55255635	19671	2	ENSG00000280890	ENST00000626532	0	NA	NA	NA
21	44910906	44912373	1468	*	10.64	10.53	10.75	-0.21	0.00496	0.216	Promoter (<=1kb)	466	44885953	44911460	25508	2	ENSG00000160255	ENST00000397857	0	3689	ITGB2	integrin subunit beta 2
2	75608341	75609402	1062	*	9.5	9.35	9.64	-0.29	0.00497	0.216	Distal Intergenic	447	75598071	75598559	489	1	ENSG00000230477	ENST00000426657	10270	NA	NA	NA
5	15248921	15249740	820	*	10.34	10.45	10.22	0.23	0.00497	0.216	Intron (ENST00000511443/ENSG00000249332, intron 1 of 2)	450	15192139	15266541	74403	2	ENSG00000249332	ENST00000511443	16801	NA	NA	NA
15	98428161	98429049	889	*	9.85	9.7	9.98	-0.28	0.00497	0.216	Distal Intergenic	460	98323902	98420998	97097	2	ENSG00000277987	ENST00000661847	-7163	NA	NA	NA
5	1208812	1209575	764	*	9.8	9.67	9.93	-0.26	0.00498	0.216	Exon (ENST00000515652/ENSG00000174358, exon 2 of 11)	450	1201595	1225111	23517	1	ENSG00000174358	ENST00000304460	7217	340024	SLC6A19	solute carrier family 6 member 19
12	113152821	113153658	838	*	10.51	10.4	10.62	-0.22	0.00499	0.216	Promoter (<=1kb)	457	113152996	113159104	6109	1	ENSG00000186710	ENST00000551256	0	387885	CFAP73	cilia and flagella associated protein 73
15	40569049	40569993	945	*	10.89	10.78	11	-0.22	0.005	0.216	Promoter (<=1kb)	460	40569299	40574949	5651	1	ENSG00000166133	ENST00000315616	0	27079	RPUSD2	RNA pseudouridine synthase domain containing 2
7	27160577	27161361	785	*	9.69	9.54	9.82	-0.28	0.00501	0.216	Promoter (2-3kb)	452	27158344	27158976	633	1	ENSG00000270182	ENST00000602610	2233	NA	NA	NA
9	88355098	88355565	468	*	8.21	8.41	7.98	0.43	0.00501	0.216	Distal Intergenic	454	88324454	88325339	886	1	ENSG00000226327	ENST00000445182	30644	NA	NA	NA
3	170469011	170469860	850	*	9.12	8.95	9.27	-0.32	0.00501	0.216	Promoter (1-2kb)	448	170467303	170477881	10579	1	ENSG00000285051	ENST00000661313	1708	101928583	SLC7A14-AS1	SLC7A14 antisense RNA 1
1	159492550	159493657	1108	*	9.82	9.95	9.67	0.27	0.00501	0.216	Distal Intergenic	446	159346166	159469068	122903	2	ENSG00000228560	ENST00000431862	-23482	NA	NA	NA
15	52789641	52790813	1173	*	9.99	10.11	9.86	0.25	0.00502	0.216	Promoter (<=1kb)	460	52755053	52790336	35284	2	ENSG00000169856	ENST00000305901	0	3175	ONECUT1	one cut homeobox 1
10	91425997	91426581	585	*	7.96	8.18	7.71	0.46	0.00502	0.217	Intron (ENST00000631422/ENSG00000165338, intron 2 of 2)	455	91410344	91514820	104477	1	ENSG00000165338	ENST00000298068	15653	143279	HECTD2	HECT domain E3 ubiquitin protein ligase 2
1	86992930	86993895	966	*	8.53	8.71	8.33	0.38	0.00504	0.217	Promoter (<=1kb)	446	86993009	87169204	176196	1	ENSG00000267561	ENST00000370548	0	NA	NA	NA
5	33074508	33075227	720	*	9.56	9.69	9.41	0.29	0.00504	0.217	Intron (ENST00000657441/ENSG00000250697, intron 1 of 1)	450	33090126	33090349	224	2	ENSG00000250672	ENST00000510162	15122	NA	NA	NA
4	102438428	102439684	1257	*	8.68	8.86	8.48	0.38	0.00504	0.217	Intron (ENST00000512915/ENSG00000248161, intron 1 of 3)	449	102418808	102431290	12483	2	ENSG00000248161	ENST00000506972	-7138	NA	NA	NA
2	199458302	199460092	1791	*	11.69	11.6	11.79	-0.19	0.00504	0.217	Promoter (<=1kb)	447	199269508	199458745	189238	2	ENSG00000119042	ENST00000443023	0	23314	SATB2	SATB homeobox 2
4	163166090	163167274	1185	*	10.27	10.14	10.38	-0.24	0.00505	0.217	Promoter (<=1kb)	449	163126708	163166890	40183	2	ENSG00000145414	ENST00000422287	0	92345	NAF1	nuclear assembly factor 1 ribonucleoprotein
19	1825959	1826937	979	*	8.9	8.71	9.06	-0.35	0.00505	0.217	Promoter (2-3kb)	464	1823200	1824542	1343	1	ENSG00000267244	ENST00000587741	2759	100288123	LOC100288123	uncharacterized LOC100288123
5	96967988	96968675	688	*	8.47	8.66	8.25	0.41	0.00506	0.217	Intron (ENST00000231368/ENSG00000113441, intron 1 of 17)	450	96962656	96962757	102	2	ENSG00000200884	ENST00000364014	-5231	NA	NA	NA
1	235093193	235094213	1021	*	9.11	8.92	9.27	-0.35	0.00506	0.217	Downstream (2-3kb)	446	235097187	235097412	226	2	ENSG00000233018	ENST00000426692	3199	NA	NA	NA
9	137167974	137169858	1885	*	11.85	11.74	11.96	-0.22	0.00507	0.217	Promoter (<=1kb)	454	137169186	137169270	85	2	ENSG00000263697	ENST00000580529	0	100500811	MIR3621	microRNA 3621
4	188002208	188002977	770	*	7.86	8.08	7.6	0.48	0.00507	0.217	Promoter (<=1kb)	449	188002708	188005045	2338	1	ENSG00000179059	ENST00000618147	0	132625	ZFP42	ZFP42 zinc finger protein
9	29077915	29078763	849	*	8.29	8.48	8.06	0.42	0.00508	0.217	Distal Intergenic	454	29214322	29229229	14908	1	ENSG00000287038	ENST00000658191	-135559	NA	NA	NA
20	51372112	51372825	714	*	9.54	9.39	9.68	-0.29	0.00508	0.217	Distal Intergenic	465	51391409	51399219	7811	2	ENSG00000101096	ENST00000496054	26394	4773	NFATC2	nuclear factor of activated T cells 2
18	2302513	2303628	1116	*	10.34	10.46	10.22	0.24	0.00508	0.217	Intron (ENST00000639316/ENSG00000263745, intron 2 of 4)	463	2034144	2258491	224348	2	ENSG00000263745	ENST00000670529	-44022	NA	NA	NA
17	16386292	16387385	1094	*	10.15	10.01	10.28	-0.27	0.00508	0.217	Distal Intergenic	462	16382152	16382669	518	2	ENSG00000265401	ENST00000583934	-3623	NA	NA	NA
17	57130853	57131493	641	*	9.12	8.94	9.27	-0.33	0.0051	0.217	Distal Intergenic	462	57116133	57121342	5210	1	ENSG00000121057	ENST00000572560	14720	8165	AKAP1	A-kinase anchoring protein 1
2	74502900	74504186	1287	*	11.05	10.95	11.15	-0.2	0.00511	0.217	Promoter (<=1kb)	447	74497517	74503316	5800	2	ENSG00000179528	ENST00000460508	0	85474	LBX2	ladybird homeobox 2
7	121288817	121289333	517	*	8.8	8.97	8.61	0.35	0.00511	0.217	Intron (ENST00000310396/ENSG00000106034, intron 22 of 22)	452	121304657	121309842	5186	2	ENSG00000287554	ENST00000657332	20509	NA	NA	NA
16	50024752	50025987	1236	*	11.11	11.01	11.2	-0.2	0.00512	0.218	Promoter (<=1kb)	461	50025206	50037087	11882	1	ENSG00000205423	ENST00000427478	0	255919	CNEP1R1	CTD nuclear envelope phosphatase 1 regulatory subunit 1
19	40442923	40443771	849	*	11.25	11.35	11.14	0.21	0.00513	0.218	Promoter (<=1kb)	464	40443436	40444087	652	1	ENSG00000268366	ENST00000599050	0	NA	NA	NA
1	85464000	85465587	1588	*	11.75	11.65	11.83	-0.18	0.00514	0.218	Promoter (<=1kb)	446	85318485	85465159	146675	2	ENSG00000153904	ENST00000284031	0	23576	DDAH1	dimethylarginine dimethylaminohydrolase 1
19	47609938	47610625	688	*	9.07	8.89	9.23	-0.33	0.00515	0.219	Promoter (<=1kb)	464	47608942	47679549	70608	1	ENSG00000063169	ENST00000594866	996	29998	BICRA	BRD4 interacting chromatin remodeling complex associated protein
2	210955411	210956440	1030	*	9.36	9.5	9.2	0.3	0.00517	0.219	Distal Intergenic	447	211104934	211105732	799	1	ENSG00000271074	ENST00000605674	-148494	NA	NA	NA
2	218658592	218660097	1506	*	11.67	11.57	11.77	-0.2	0.00518	0.219	Promoter (<=1kb)	447	218658764	218661217	2454	1	ENSG00000074582	ENST00000428880	0	617	BCS1L	BCS1 homolog, ubiquinol-cytochrome c reductase complex chaperone
7	111981995	111982568	574	*	8.38	8.57	8.16	0.41	0.00518	0.219	Intron (ENST00000428084/ENSG00000128512, intron 7 of 52)	452	111971222	111971988	767	2	ENSG00000234358	ENST00000413552	-10007	NA	NA	NA
5	26601344	26602134	791	*	9.75	9.87	9.61	0.27	0.00518	0.219	Distal Intergenic	450	26669346	26669736	391	1	ENSG00000230571	ENST00000413321	-67212	NA	NA	NA
5	14775616	14776371	756	*	10.11	10.23	9.99	0.24	0.00519	0.22	Intron (ENST00000284268/ENSG00000154122, intron 1 of 11)	450	14768162	14769150	989	2	ENSG00000154122	ENST00000646501	-6466	56172	ANKH	ANKH inorganic pyrophosphate transport regulator
2	58638312	58638756	445	*	7.94	8.16	7.68	0.48	0.0052	0.22	Intron (ENST00000422723/ENSG00000233723, intron 2 of 5)	447	58633714	58697041	63328	1	ENSG00000233723	ENST00000662396	4598	400955	LINC01122	long intergenic non-protein coding RNA 1122
8	96146862	96147576	715	*	10.41	10.29	10.53	-0.24	0.0052	0.22	Intron (ENST00000287020/ENSG00000156466, intron 1 of 1)	453	96140572	96140944	373	2	ENSG00000270131	ENST00000602571	-5918	NA	NA	NA
4	30719277	30720918	1642	*	11.4	11.3	11.49	-0.19	0.00521	0.22	Promoter (<=1kb)	449	30720415	30732973	12559	1	ENSG00000169851	ENST00000361762	0	5099	PCDH7	protocadherin 7
2	173850986	173851907	922	*	10.04	9.91	10.16	-0.25	0.00521	0.22	Distal Intergenic	447	173871653	173872465	813	2	ENSG00000234415	ENST00000444235	20558	NA	NA	NA
3	39140977	39142436	1460	*	11.61	11.51	11.7	-0.18	0.00522	0.22	Promoter (2-3kb)	448	39138264	39138903	640	1	ENSG00000168026	ENST00000460460	2713	199223	TTC21A	tetratricopeptide repeat domain 21A
15	47756852	47757284	433	*	7.64	7.88	7.36	0.52	0.00524	0.221	Promoter (2-3kb)	460	47759723	47762319	2597	1	ENSG00000137872	ENST00000559196	-2439	80031	SEMA6D	semaphorin 6D
7	46752120	46752683	564	*	8.83	8.99	8.64	0.35	0.00524	0.221	Intron (ENST00000487094/ENSG00000233539, intron 1 of 4)	452	46688940	46759844	70905	2	ENSG00000233539	ENST00000469937	7161	730338	LOC730338	uncharacterized LOC730338
3	190672971	190673588	618	*	8.24	8.44	8	0.44	0.00525	0.221	Distal Intergenic	448	190659216	190659750	535	1	ENSG00000273370	ENST00000609508	13755	NA	NA	NA
2	45190392	45190971	580	*	7.96	8.18	7.72	0.46	0.00525	0.221	Promoter (1-2kb)	447	45187170	45192285	5116	2	ENSG00000205054	ENST00000454673	1314	400952	LINC01121	long intergenic non-protein coding RNA 1121
15	71747509	71748181	673	*	8.95	9.11	8.77	0.34	0.00526	0.221	Intron (ENST00000355327/ENSG00000187720, intron 13 of 17)	460	71792638	71818259	25622	1	ENSG00000278570	ENST00000621736	-44457	10002	NR2E3	nuclear receptor subfamily 2 group E member 3
16	88455111	88455881	771	*	9.88	9.73	10.02	-0.29	0.00528	0.221	Promoter (1-2kb)	461	88453627	88516646	63020	1	ENSG00000179588	ENST00000562437	1484	161882	ZFPM1	zinc finger protein, FOG family member 1
9	33180612	33181542	931	*	9.51	9.64	9.35	0.29	0.00528	0.221	Exon (ENST00000654325/ENSG00000233554, exon 4 of 4)	454	33174170	33174295	126	1	ENSG00000252224	ENST00000516415	6442	NA	NA	NA
3	177595820	177597970	2151	*	11.38	11.29	11.47	-0.19	0.00528	0.221	Intron (ENST00000442937/ENSG00000228221, intron 2 of 3)	448	177617590	177752094	134505	1	ENSG00000228221	ENST00000445673	-19620	100505566	LINC00578	long intergenic non-protein coding RNA 578
2	233029267	233030290	1024	*	10.81	10.9	10.7	0.21	0.00528	0.221	Promoter (2-3kb)	447	233032672	233035057	2386	1	ENSG00000115488	ENST00000233840	-2382	4759	NEU2	neuraminidase 2
18	67766910	67767335	426	*	8.01	8.22	7.77	0.46	0.00528	0.221	Promoter (<=1kb)	463	67672224	67767051	94828	2	ENSG00000263594	ENST00000666895	0	NA	NA	NA
X	140432213	140433001	789	*	8.09	7.85	8.29	-0.44	0.0053	0.222	Distal Intergenic	468	140451148	140451208	61	1	ENSG00000275268	ENST00000517224	-18147	NA	NA	NA
12	80509422	80510599	1178	*	8.76	8.93	8.56	0.37	0.00531	0.222	Promoter (2-3kb)	457	80512642	80539838	27197	1	ENSG00000139304	ENST00000547485	-2043	374462	PTPRQ	protein tyrosine phosphatase receptor type Q
5	37738080	37738694	615	*	9.67	9.8	9.53	0.27	0.00532	0.222	Intron (ENST00000511906/ENSG00000082068, intron 14 of 14)	450	37724843	37752670	27828	1	ENSG00000082068	ENST00000508730	13237	55100	WDR70	WD repeat domain 70
1	91749578	91750694	1117	*	10.5	10.38	10.61	-0.23	0.00532	0.222	Intron (ENST00000533089/ENSG00000069702, intron 7 of 19)	446	91727777	91766432	38656	2	ENSG00000069702	ENST00000468996	15738	7049	TGFBR3	transforming growth factor beta receptor 3
10	59513519	59514154	636	*	8.03	8.24	7.78	0.46	0.00532	0.222	Distal Intergenic	455	59551404	59551878	475	2	ENSG00000235469	ENST00000446432	37724	NA	NA	NA
5	25091860	25092277	418	*	8	8.22	7.74	0.47	0.00533	0.222	Intron (ENST00000641970/ENSG00000251273, intron 5 of 5)	450	25187800	25193543	5744	1	ENSG00000245662	ENST00000642022	-95523	NA	NA	NA
1	28417346	28418219	874	*	10.19	10.32	10.05	0.26	0.00533	0.222	Intron (ENST00000633371/ENSG00000204138, intron 2 of 4)	446	28422555	28422655	101	2	ENSG00000206779	ENST00000384052	4436	NA	NA	NA
17	40309019	40309746	728	*	10.72	10.61	10.83	-0.22	0.00533	0.222	Promoter (<=1kb)	462	40309180	40357643	48464	1	ENSG00000131759	ENST00000254066	0	5914	RARA	retinoic acid receptor alpha
16	55056449	55057149	701	*	7.81	7.55	8.03	-0.49	0.00534	0.222	Distal Intergenic	461	55045700	55049318	3619	2	ENSG00000285775	ENST00000650608	-7131	NA	NA	NA
1	219173619	219174977	1359	*	9.81	9.67	9.94	-0.26	0.00534	0.222	Promoter (<=1kb)	446	219173869	219212865	38997	1	ENSG00000143353	ENST00000460522	0	127018	LYPLAL1	lysophospholipase like 1
7	137772745	137773177	433	*	7.85	8.07	7.59	0.48	0.00534	0.222	Promoter (1-2kb)	452	137771599	137774649	3051	2	ENSG00000157680	ENST00000475388	1472	9162	DGKI	diacylglycerol kinase iota
19	17333887	17335236	1350	*	11.4	11.31	11.49	-0.18	0.00534	0.222	Promoter (<=1kb)	464	17323223	17334737	11515	2	ENSG00000074855	ENST00000597643	0	57719	ANO8	anoctamin 8
17	75032298	75032843	546	*	10.16	10.03	10.28	-0.25	0.00537	0.222	Promoter (<=1kb)	462	75032575	75049284	16710	1	ENSG00000180901	ENST00000579242	0	23510	KCTD2	potassium channel tetramerization domain containing 2
3	111902738	111903549	812	*	9.6	9.73	9.46	0.27	0.00537	0.222	Intron (ENST00000393923/ENSG00000144824, intron 3 of 17)	448	111911610	111976465	64856	1	ENSG00000144824	ENST00000495180	-8061	90102	PHLDB2	pleckstrin homology like domain family B member 2
3	138114369	138116126	1758	*	11.88	11.79	11.96	-0.17	0.00537	0.222	Promoter (<=1kb)	448	138061990	138115608	53619	2	ENSG00000158163	ENST00000327532	0	199221	DZIP1L	DAZ interacting zinc finger protein 1 like
3	190374131	190374642	512	*	7.79	8.02	7.52	0.51	0.00537	0.222	Exon (ENST00000468220/ENSG00000113946, exon 3 of 5)	448	190388120	190410008	21889	1	ENSG00000113946	ENST00000456423	-13478	10686	CLDN16	claudin 16
8	41827892	41829150	1259	*	11.19	11.09	11.29	-0.2	0.00538	0.222	Promoter (<=1kb)	453	41828165	41829934	1770	2	ENSG00000260588	ENST00000563810	784	NA	NA	NA
14	35808512	35809527	1016	*	10.93	10.82	11.03	-0.21	0.00538	0.222	Promoter (<=1kb)	459	35538352	35809226	270875	2	ENSG00000174373	ENST00000389698	0	253959	RALGAPA1	Ral GTPase activating protein catalytic alpha subunit 1
5	172716824	172717296	473	*	9.67	9.53	9.8	-0.27	0.00538	0.222	Distal Intergenic	450	172690454	172697720	7267	2	ENSG00000253445	ENST00000519976	-19104	NA	NA	NA
12	124679426	124680153	728	*	9.94	9.81	10.06	-0.25	0.00538	0.222	Distal Intergenic	457	124637999	124638444	446	2	ENSG00000279087	ENST00000623827	-40982	NA	NA	NA
10	117618797	117620023	1227	*	10	9.87	10.12	-0.25	0.00538	0.222	Distal Intergenic	455	117579854	117593896	14043	1	ENSG00000288172	ENST00000672708	38943	NA	NA	NA
6	26249660	26250785	1126	*	10.8	10.68	10.91	-0.23	0.00539	0.222	Promoter (<=1kb)	451	26250142	26250635	494	2	ENSG00000277775	ENST00000618052	0	8968	H3C7	H3 clustered histone 7
1	84771936	84772933	998	*	8.39	8.17	8.58	-0.41	0.00539	0.222	Distal Intergenic	446	84785427	84786714	1288	1	ENSG00000285325	ENST00000643511	-12494	NA	NA	NA
15	75646920	75648902	1983	*	11.9	11.8	11.99	-0.19	0.00539	0.222	Promoter (<=1kb)	460	75647912	75662301	14390	1	ENSG00000173548	ENST00000308527	0	257364	SNX33	sorting nexin 33
14	61561167	61562258	1092	*	11.42	11.32	11.52	-0.19	0.0054	0.222	Exon (ENST00000508827/ENSG00000250548, exon 4 of 5)	459	61556313	61570194	13882	2	ENSG00000250548	ENST00000553288	7936	101927780	LINC01303	long intergenic non-protein coding RNA 1303
3	139534071	139535587	1517	*	10.92	10.81	11.02	-0.21	0.0054	0.222	Intron (ENST00000662234/ENSG00000248932, intron 4 of 7)	448	139517574	139539587	22014	2	ENSG00000114115	ENST00000619087	4000	5947	RBP1	retinol binding protein 1
2	48529787	48530891	1105	*	9.82	9.68	9.95	-0.27	0.00542	0.223	Promoter (<=1kb)	447	48529925	48679603	149679	1	ENSG00000068781	ENST00000405008	0	286749	STON1-GTF2A1L	STON1-GTF2A1L readthrough
17	44350627	44351290	664	*	9.12	8.94	9.28	-0.34	0.00542	0.223	Promoter (<=1kb)	462	44350772	44351795	1024	1	ENSG00000030582	ENST00000589923	0	2896	GRN	granulin precursor
7	74477347	74478600	1254	*	12.44	12.35	12.53	-0.17	0.00543	0.223	Intron (ENST00000265755/ENSG00000006704, intron 1 of 26)	452	74487428	74487540	113	2	ENSG00000238391	ENST00000459153	8940	NA	NA	NA
6	108732215	108732998	784	*	9.54	9.67	9.39	0.28	0.00544	0.223	Distal Intergenic	451	108751654	108768456	16803	1	ENSG00000203801	ENST00000416104	-18656	387111	LINC00222	long intergenic non-protein coding RNA 222
12	27981785	27982618	834	*	9.46	9.6	9.31	0.28	0.00544	0.223	Distal Intergenic	457	27958084	27972733	14650	2	ENSG00000087494	ENST00000545234	-9052	5744	PTHLH	parathyroid hormone like hormone
7	17444587	17445107	521	*	8.64	8.81	8.44	0.37	0.00544	0.223	Intron (ENST00000637807/ENSG00000283321, intron 10 of 11)	452	17434477	17460672	26196	2	ENSG00000236039	ENST00000439046	15565	101927630	LOC101927630	uncharacterized LOC101927630
1	107820725	107821795	1071	*	8.92	9.08	8.74	0.34	0.00545	0.223	Promoter (<=1kb)	446	107766515	107820896	54382	2	ENSG00000134215	ENST00000524574	0	10451	VAV3	vav guanine nucleotide exchange factor 3
17	35245211	35245589	379	*	9.64	9.77	9.49	0.29	0.00546	0.223	Promoter (2-3kb)	462	35243089	35259820	16732	1	ENSG00000166750	ENST00000592325	2122	162394	SLFN5	schlafen family member 5
6	43143296	43144147	852	*	9.77	9.64	9.9	-0.26	0.00546	0.223	Promoter (<=1kb)	451	43144299	43159883	15585	1	ENSG00000112655	ENST00000473339	-152	5754	PTK7	protein tyrosine kinase 7 (inactive)
14	104296262	104297267	1006	*	10.66	10.55	10.76	-0.21	0.00546	0.223	Promoter (2-3kb)	459	104293678	104294921	1244	1	ENSG00000288459	ENST00000672686	2584	NA	NA	NA
15	60358886	60359999	1114	*	11.19	11.09	11.28	-0.19	0.00547	0.223	Exon (ENST00000677258/ENSG00000182718, exon 5 of 5)	460	60351192	60374505	23314	2	ENSG00000182718	ENST00000559176	14506	302	ANXA2	annexin A2
1	33458570	33458988	419	*	7.7	7.93	7.43	0.5	0.00549	0.223	Distal Intergenic	446	33466249	33468954	2706	1	ENSG00000234512	ENST00000413515	-7261	NA	NA	NA
1	149558045	149559053	1009	*	10.08	9.94	10.2	-0.25	0.00549	0.223	Distal Intergenic	446	149583865	149584464	600	1	ENSG00000263464	ENST00000585245	-24812	653598	PPIAL4C	peptidylprolyl isomerase A like 4C
7	2640445	2642035	1591	*	11.6	11.5	11.68	-0.18	0.00549	0.223	Intron (ENST00000258796/ENSG00000136295, intron 1 of 13)	452	2645532	2647176	1645	1	ENSG00000136295	ENST00000400376	-3497	80727	TTYH3	tweety family member 3
17	54967566	54969548	1983	*	11.32	11.21	11.41	-0.2	0.00551	0.223	Promoter (<=1kb)	462	54951902	54968653	16752	2	ENSG00000166260	ENST00000576370	0	1353	COX11	cytochrome c oxidase copper chaperone COX11
7	2313792	2314963	1172	*	11.44	11.55	11.32	0.23	0.00551	0.223	Promoter (<=1kb)	452	2251770	2314441	62672	2	ENSG00000106266	ENST00000222990	0	29886	SNX8	sorting nexin 8
1	31064885	31066234	1350	*	11.85	11.75	11.95	-0.19	0.00551	0.223	Promoter (<=1kb)	446	30931506	31065695	134190	2	ENSG00000134644	ENST00000424085	0	9698	PUM1	pumilio RNA binding family member 1
19	43439185	43439586	402	*	7.82	8.05	7.56	0.49	0.00551	0.223	Distal Intergenic	464	43414890	43418597	3708	1	ENSG00000131126	ENST00000598265	24295	83639	TEX101	testis expressed 101
17	76585344	76586485	1142	*	11.36	11.25	11.46	-0.21	0.00551	0.223	Promoter (<=1kb)	462	76565377	76585860	20484	2	ENSG00000070731	ENST00000225276	0	10610	ST6GALNAC2	ST6 N-acetylgalactosaminide alpha-2,6-sialyltransferase 2
8	77565659	77566917	1259	*	10.18	10.3	10.04	0.26	0.00551	0.223	Distal Intergenic	453	77504779	77516922	12144	1	ENSG00000254366	ENST00000655149	60880	NA	NA	NA
20	33653096	33653918	823	*	9.13	8.96	9.28	-0.32	0.00551	0.223	Promoter (2-3kb)	465	33655701	33656423	723	2	ENSG00000275223	ENST00000621597	2505	NA	NA	NA
12	67981199	67982082	884	*	8.77	8.94	8.57	0.37	0.00552	0.223	Promoter (2-3kb)	457	67978107	67978387	281	2	ENSG00000256835	ENST00000355509	-2812	NA	NA	NA
19	18969405	18970540	1136	*	10.02	10.14	9.89	0.25	0.00552	0.223	Distal Intergenic	464	18957957	18958258	302	2	ENSG00000241172	ENST00000478322	-11147	NA	NA	NA
1	3695607	3695994	388	*	8	7.74	8.22	-0.48	0.00553	0.223	Promoter (2-3kb)	446	3698046	3708534	10489	1	ENSG00000078900	ENST00000604194	-2052	7161	TP73	tumor protein p73
2	29022360	29023305	946	*	10.95	10.84	11.05	-0.21	0.00553	0.223	5' UTR	447	29018261	29024374	6114	1	ENSG00000189350	ENST00000440012	4099	165186	TOGARAM2	TOG array regulator of axonemal microtubules 2
6	3279586	3279994	409	*	7.85	7.58	8.08	-0.5	0.00553	0.223	Intron (ENST00000451246/ENSG00000180822, intron 1 of 2)	451	3273356	3284120	10765	2	ENSG00000137266	ENST00000482874	4126	63027	SLC22A23	solute carrier family 22 member 23
4	83535387	83536934	1548	*	11.79	11.7	11.87	-0.17	0.00554	0.223	Promoter (<=1kb)	449	83535914	83544613	8700	1	ENSG00000138678	ENST00000514309	0	84803	GPAT3	glycerol-3-phosphate acyltransferase 3
7	1182844	1183841	998	*	8.91	8.73	9.07	-0.34	0.00554	0.223	Distal Intergenic	452	1160026	1160759	734	2	ENSG00000178381	ENST00000478137	-22085	90637	ZFAND2A	zinc finger AN1-type containing 2A
1	1330585	1331677	1093	*	11.23	11.13	11.33	-0.2	0.00554	0.223	Promoter (<=1kb)	446	1331280	1335314	4035	1	ENSG00000169962	ENST00000339381	0	83756	TAS1R3	taste 1 receptor member 3
6	34223438	34224698	1261	*	10.87	10.97	10.76	0.22	0.00554	0.223	Distal Intergenic	451	34219439	34220066	628	1	ENSG00000214810	ENST00000399027	3999	NA	NA	NA
22	50674621	50675576	956	*	9.33	9.49	9.15	0.33	0.00555	0.223	Promoter (<=1kb)	467	50674642	50731312	56671	1	ENSG00000251322	ENST00000445220	0	85358	SHANK3	SH3 and multiple ankyrin repeat domains 3
4	92120754	92121599	846	*	9.97	9.83	10.09	-0.26	0.00556	0.223	Distal Intergenic	449	92183235	92265316	82082	1	ENSG00000287392	ENST00000662528	-61636	NA	NA	NA
5	56543417	56544508	1092	*	9.41	9.55	9.26	0.29	0.00556	0.223	Intron (ENST00000648716/ENSG00000225940, intron 2 of 5)	450	56536583	56537826	1244	2	ENSG00000234553	ENST00000431789	-5591	NA	NA	NA
2	46541609	46542832	1224	*	11.11	11.21	11	0.21	0.00557	0.224	Promoter (<=1kb)	447	46541806	46576249	34444	1	ENSG00000119729	ENST00000465198	0	23433	RHOQ	ras homolog family member Q
12	123270357	123272304	1948	*	10.36	10.47	10.23	0.24	0.00557	0.224	Promoter (<=1kb)	457	123260976	123271856	10881	2	ENSG00000111328	ENST00000261692	0	8099	CDK2AP1	cyclin dependent kinase 2 associated protein 1
5	20678702	20679465	764	*	10.44	10.55	10.32	0.22	0.00557	0.224	Intron (ENST00000657383/ENSG00000251629, intron 2 of 9)	450	20736952	20936783	199832	1	ENSG00000251629	ENST00000654633	-57487	105374676	LINC02241	long intergenic non-protein coding RNA 2241
1	97849731	97850368	638	*	9.12	9.28	8.95	0.33	0.00558	0.224	Intron (ENST00000370192/ENSG00000188641, intron 2 of 22)	446	97855575	97856825	1251	1	ENSG00000270911	ENST00000604863	-5207	NA	NA	NA
14	22296017	22297226	1210	*	9.36	9.51	9.19	0.31	0.00558	0.224	Intron (ENST00000656379/ENSG00000251002, intron 3 of 3)	459	22304054	22304553	500	1	ENSG00000211818	ENST00000390466	-6828	NA	NA	NA
14	105180604	105181712	1109	*	9.87	10.01	9.71	0.31	0.00559	0.224	Promoter (<=1kb)	459	105172939	105181312	8374	2	ENSG00000183828	ENST00000392568	0	256281	NUDT14	nudix hydrolase 14
6	152110877	152111849	973	*	9.79	9.66	9.92	-0.26	0.0056	0.224	Promoter (<=1kb)	451	152112759	152118397	5639	1	ENSG00000284615	ENST00000641922	-910	NA	NA	NA
12	106112140	106112890	751	*	9.53	9.38	9.66	-0.28	0.00562	0.224	Intron (ENST00000261402/ENSG00000074590, intron 1 of 6)	457	106103163	106106165	3003	1	ENSG00000257438	ENST00000548901	8977	NA	NA	NA
1	242225628	242226104	477	*	9.01	9.16	8.83	0.33	0.00563	0.224	Intron (ENST00000536534/ENSG00000180287, intron 4 of 9)	446	242203555	242210827	7273	1	ENSG00000224525	ENST00000421878	22073	NA	NA	NA
7	149496240	149498235	1996	*	11.13	11.23	11.01	0.22	0.00563	0.224	Promoter (<=1kb)	452	149472696	149497817	25122	2	ENSG00000181220	ENST00000644635	0	155061	ZNF746	zinc finger protein 746
2	197184899	197185621	723	*	10.68	10.58	10.78	-0.21	0.00564	0.224	Intron (ENST00000282272/ENSG00000065413, intron 2 of 27)	447	197197991	197199273	1283	1	ENSG00000231621	ENST00000449346	-12370	101927596	ANKRD44-AS1	ANKRD44 antisense RNA 1
16	27367781	27368465	685	*	8.72	8.51	8.9	-0.4	0.00564	0.224	Distal Intergenic	461	27355348	27362296	6949	1	ENSG00000077238	ENST00000563886	12433	3566	IL4R	interleukin 4 receptor
9	107243623	107244247	625	*	8.37	8.57	8.15	0.42	0.00565	0.224	Distal Intergenic	454	107283137	107306590	23454	1	ENSG00000119318	ENST00000419616	-38890	5887	RAD23B	RAD23 homolog B, nucleotide excision repair protein
4	31283145	31284256	1112	*	9.28	9.42	9.11	0.31	0.00565	0.224	Distal Intergenic	449	31350284	31351725	1442	1	ENSG00000251434	ENST00000505636	-66028	NA	NA	NA
6	125769865	125770869	1005	*	9.61	9.47	9.74	-0.27	0.00565	0.224	Distal Intergenic	451	125781161	125931111	149951	1	ENSG00000111912	ENST00000368357	-10292	135112	NCOA7	nuclear receptor coactivator 7
18	10715723	10716315	593	*	7.8	8.02	7.53	0.49	0.00566	0.224	Promoter (<=1kb)	463	10705336	10714930	9595	2	ENSG00000154864	ENST00000643712	-793	63895	PIEZO2	piezo type mechanosensitive ion channel component 2
3	9946108	9947723	1616	*	12.37	12.28	12.45	-0.17	0.00566	0.224	Promoter (<=1kb)	448	9947404	9954787	7384	1	ENSG00000230082	ENST00000431558	0	100874032	PRRT3-AS1	PRRT3 antisense RNA 1
2	195682945	195683907	963	*	9.36	9.5	9.2	0.3	0.00566	0.224	Promoter (2-3kb)	447	195680477	195717383	36907	1	ENSG00000196950	ENST00000465851	2468	57181	SLC39A10	solute carrier family 39 member 10
6	105432783	105433248	466	*	8.71	8.89	8.52	0.37	0.00566	0.224	Intron (ENST00000650898/ENSG00000286084, intron 1 of 1)	451	105277270	105454062	176793	2	ENSG00000085377	ENST00000369110	20814	5550	PREP	prolyl endopeptidase
6	82408647	82409846	1200	*	9.48	9.62	9.32	0.3	0.00567	0.224	Distal Intergenic	451	82364244	82367417	3174	1	ENSG00000146242	ENST00000543496	44403	7162	TPBG	trophoblast glycoprotein
8	8669538	8670331	794	*	8.86	8.67	9.02	-0.35	0.00567	0.224	Distal Intergenic	453	8665497	8669404	3908	1	ENSG00000286910	ENST00000664885	4041	NA	NA	NA
1	79198829	79199418	590	*	8.35	8.54	8.13	0.41	0.00567	0.224	Intron (ENST00000661030/ENSG00000162618, intron 1 of 16)	446	78937962	79188483	250522	2	ENSG00000162618	ENST00000656300	-10346	64123	ADGRL4	adhesion G protein-coupled receptor L4
1	3795683	3797072	1390	*	11.24	11.14	11.33	-0.19	0.00568	0.224	Promoter (<=1kb)	446	3778559	3796498	17940	2	ENSG00000130764	ENST00000378251	0	57470	LRRC47	leucine rich repeat containing 47
17	20935430	20936220	791	*	9.74	9.87	9.6	0.27	0.00569	0.224	Promoter (2-3kb)	462	20938023	20938344	322	2	ENSG00000265099	ENST00000584708	2124	NA	NA	NA
2	51993961	51994821	861	*	9.55	9.4	9.68	-0.29	0.00569	0.224	Intron (ENST00000440698/ENSG00000231918, intron 7 of 10)	447	51977787	52022435	44649	2	ENSG00000287344	ENST00000663568	27614	NA	NA	NA
5	106637188	106637674	487	*	7.97	8.18	7.72	0.46	0.00569	0.224	Distal Intergenic	450	106546665	106546803	139	1	ENSG00000252337	ENST00000516528	90523	NA	NA	NA
1	92484364	92486403	2040	*	10.49	10.37	10.6	-0.23	0.0057	0.224	Promoter (<=1kb)	446	92474762	92486071	11310	2	ENSG00000162676	ENST00000427103	0	2672	GFI1	growth factor independent 1 transcriptional repressor
2	20093491	20094213	723	*	8.44	8.23	8.62	-0.39	0.0057	0.224	Intron (ENST00000430429/ENSG00000234378, intron 1 of 1)	447	20063856	20106829	42974	2	ENSG00000234378	ENST00000430429	12616	NA	NA	NA
10	112081961	112082791	831	*	9.83	9.69	9.95	-0.26	0.0057	0.224	Distal Intergenic	455	111787233	111989909	202677	2	ENSG00000287231	ENST00000656217	-92052	NA	NA	NA
16	58236039	58236938	900	*	8.65	8.45	8.83	-0.38	0.0057	0.224	Intron (ENST00000569374/ENSG00000103021, intron 2 of 3)	461	58231157	58254096	22940	1	ENSG00000103021	ENST00000569374	4882	29070	CCDC113	coiled-coil domain containing 113
8	144270336	144271092	757	*	10.63	10.52	10.73	-0.21	0.0057	0.224	Intron (ENST00000569669/ENSG00000261236, intron 3 of 15)	453	144266453	144268481	2029	1	ENSG00000260428	ENST00000567180	3883	642658	SCX	scleraxis bHLH transcription factor
4	39365614	39366606	993	*	9.32	9.16	9.47	-0.31	0.0057	0.224	Promoter (<=1kb)	449	39287456	39366362	78907	2	ENSG00000035928	ENST00000349703	0	5981	RFC1	replication factor C subunit 1
20	50103425	50104257	833	*	9.92	10.04	9.79	0.25	0.00571	0.224	Intron (ENST00000371657/ENSG00000244687, intron 1 of 2)	465	50096059	50111566	15508	2	ENSG00000244687	ENST00000473860	7309	7335	UBE2V1	ubiquitin conjugating enzyme E2 V1
1	15678585	15678964	380	*	8.65	8.83	8.45	0.38	0.00571	0.224	Distal Intergenic	446	15682873	15683128	256	2	ENSG00000271742	ENST00000606262	4164	NA	NA	NA
1	21331859	21332651	793	*	10.65	10.54	10.75	-0.21	0.00571	0.224	Intron (ENST00000415912/ENSG00000117298, intron 1 of 18)	446	21272835	21345137	72303	2	ENSG00000117298	ENST00000463334	12486	1889	ECE1	endothelin converting enzyme 1
3	162390848	162391702	855	*	8.21	8.41	7.97	0.44	0.00571	0.224	Distal Intergenic	448	162486541	162486949	409	2	ENSG00000241874	ENST00000465035	95247	NA	NA	NA
3	1272642	1273466	825	*	7.95	7.69	8.17	-0.48	0.00573	0.225	Intron (ENST00000397479/ENSG00000134115, intron 3 of 21)	448	1394173	1394448	276	2	ENSG00000232563	ENST00000449338	120982	NA	NA	NA
13	63948003	63948567	565	*	9.19	9.34	9.02	0.32	0.00573	0.225	Intron (ENST00000650541/ENSG00000227674, intron 5 of 6)	458	63975451	63976422	972	2	ENSG00000237849	ENST00000431953	27855	NA	NA	NA
12	91230780	91231445	666	*	7.88	8.11	7.61	0.5	0.00574	0.225	Distal Intergenic	457	91193709	91193942	234	1	ENSG00000258148	ENST00000546853	37071	NA	NA	NA
7	150322809	150323981	1173	*	10.88	10.78	10.98	-0.2	0.00575	0.225	Promoter (<=1kb)	452	150243916	150323573	79658	2	ENSG00000106526	ENST00000478393	0	653857	ACTR3C	actin related protein 3C
7	90625979	90626344	366	*	7.92	8.14	7.67	0.47	0.00576	0.225	Intron (ENST00000449528/ENSG00000058091, intron 5 of 7)	452	90631906	90632568	663	1	ENSG00000223584	ENST00000450317	-5562	NA	NA	NA
12	40141849	40142690	842	*	7.72	7.96	7.44	0.52	0.00576	0.225	Promoter (<=1kb)	457	40140926	40142876	1951	2	ENSG00000260943	ENST00000563933	186	NA	NA	NA
5	126124585	126125327	743	*	9.42	9.56	9.26	0.3	0.00577	0.226	Intron (ENST00000651847/ENSG00000248752, intron 2 of 15)	450	126179565	126193858	14294	1	ENSG00000248107	ENST00000667560	-54238	102546228	LINC02039	long intergenic non-protein coding RNA 2039
15	71002332	71003241	910	*	8.9	9.06	8.72	0.34	0.00578	0.226	Intron (ENST00000544974/ENSG00000137821, intron 12 of 16)	460	70980099	71009978	29880	1	ENSG00000137821	ENST00000559422	22233	54839	LRRC49	leucine rich repeat containing 49
2	174335924	174337533	1610	*	10.23	10.1	10.35	-0.25	0.00581	0.227	Promoter (<=1kb)	447	174334438	174337566	3129	2	ENSG00000280414	ENST00000624790	33	NA	NA	NA
4	91829570	91829905	336	*	7.94	8.16	7.69	0.47	0.00582	0.227	Distal Intergenic	449	91885046	91885254	209	2	ENSG00000249891	ENST00000510983	55349	NA	NA	NA
3	17183811	17184359	549	*	7.88	8.1	7.62	0.48	0.00582	0.227	Intron (ENST00000649558/ENSG00000285731, intron 3 of 4)	448	17141015	17205165	64151	1	ENSG00000285731	ENST00000649558	42796	NA	NA	NA
2	63225817	63226890	1074	*	9.42	9.57	9.26	0.32	0.00583	0.227	Intron (ENST00000272321/ENSG00000143951, intron 14 of 17)	447	63232453	63233577	1125	2	ENSG00000233716	ENST00000438685	6687	NA	NA	NA
1	1943799	1944512	714	*	9.03	8.86	9.19	-0.32	0.00584	0.227	Exon (ENST00000642590/ENSG00000142609, exon 7 of 25)	446	1921951	1959974	38024	2	ENSG00000142609	ENST00000642590	15462	85452	CFAP74	cilia and flagella associated protein 74
15	56060363	56061019	657	*	7.94	8.16	7.68	0.47	0.00584	0.227	Distal Intergenic	460	56071421	56071639	219	1	ENSG00000261333	ENST00000565486	-10402	NA	NA	NA
12	116864365	116865218	854	*	9.15	9.3	8.99	0.32	0.00584	0.227	Intron (ENST00000257572/ENSG00000135116, intron 1 of 1)	457	116869477	116878497	9021	2	ENSG00000135116	ENST00000586941	13279	8739	HRK	harakiri, BCL2 interacting protein
3	45667920	45668719	800	*	9.38	9.52	9.23	0.29	0.00584	0.227	Promoter (2-3kb)	448	45665675	45674566	8892	1	ENSG00000144791	ENST00000474665	2245	8994	LIMD1	LIM domains containing 1
7	30905491	30907164	1674	*	11.44	11.34	11.52	-0.18	0.00586	0.228	Intron (ENST00000509504/ENSG00000250424, intron 7 of 10)	452	30911853	30925501	13649	1	ENSG00000240583	ENST00000652696	-4689	358	AQP1	aquaporin 1 (Colton blood group)
1	231590376	231591133	758	*	7.82	7.56	8.04	-0.48	0.00587	0.228	Intron (ENST00000647072/ENSG00000270106, intron 4 of 7)	446	231591292	231612090	20799	2	ENSG00000229228	ENST00000448058	20957	100287814	LINC00582	long intergenic non-protein coding RNA 582
3	129314584	129316929	2346	*	11.76	11.66	11.85	-0.19	0.00587	0.228	Promoter (<=1kb)	448	129314771	129316286	1516	2	ENSG00000184897	ENST00000333762	0	8971	H1-10	H1.10 linker histone
7	120856758	120858564	1807	*	11.96	11.87	12.05	-0.18	0.00587	0.228	Promoter (<=1kb)	452	120787320	120858144	70825	2	ENSG00000106025	ENST00000222747	0	23554	TSPAN12	tetraspanin 12
2	67400691	67401459	769	*	9.36	9.5	9.21	0.29	0.00588	0.228	Promoter (2-3kb)	447	67175188	67397980	222793	2	ENSG00000236780	ENST00000652561	-2711	644838	LINC01829	long intergenic non-protein coding RNA 1829
15	33104167	33104757	591	*	9.29	9.43	9.13	0.3	0.00588	0.228	Promoter (1-2kb)	460	33105758	33106236	479	2	ENSG00000279958	ENST00000623516	1479	NA	NA	NA
4	175419160	175419907	748	*	8.1	8.3	7.86	0.44	0.00589	0.228	Distal Intergenic	449	175346358	175403110	56753	2	ENSG00000248551	ENST00000502661	-16050	NA	NA	NA
6	149440965	149441971	1007	*	8.82	8.63	8.98	-0.35	0.00589	0.228	Distal Intergenic	451	149447658	149449380	1723	2	ENSG00000178199	ENST00000498662	7409	340152	ZC3H12D	zinc finger CCCH-type containing 12D
1	162541627	162542257	631	*	8.77	8.94	8.58	0.36	0.00591	0.228	Promoter (<=1kb)	446	162541332	162541628	297	2	ENSG00000227941	ENST00000447827	0	NA	NA	NA
22	27405739	27406276	538	*	8.11	7.85	8.33	-0.49	0.00592	0.228	Distal Intergenic	467	27414462	27415205	744	2	ENSG00000280445	ENST00000625043	8929	NA	NA	NA
6	126180324	126181066	743	*	9.84	9.97	9.69	0.28	0.00592	0.228	Intron (ENST00000648977/ENSG00000066651, intron 22 of 22)	451	126177193	126202239	25047	1	ENSG00000066651	ENST00000444229	3131	60487	TRMT11	tRNA methyltransferase 11 homolog
8	19939004	19940775	1772	*	11.23	11.13	11.32	-0.19	0.00593	0.228	Promoter (<=1kb)	453	19939253	19967259	28007	1	ENSG00000175445	ENST00000650287	0	4023	LPL	lipoprotein lipase
4	144579440	144580056	617	*	9.73	9.85	9.59	0.26	0.00593	0.228	Intron (ENST00000650526/ENSG00000285783, intron 2 of 14)	449	144572238	144572983	746	1	ENSG00000250504	ENST00000504966	7202	NA	NA	NA
16	3182412	3184397	1986	*	11.71	11.62	11.79	-0.18	0.00593	0.228	Promoter (<=1kb)	461	3181233	3184018	2786	2	ENSG00000262521	ENST00000576762	0	NA	NA	NA
16	24499216	24499697	482	*	8.95	8.77	9.11	-0.34	0.00593	0.228	Distal Intergenic	461	24472798	24495177	22380	2	ENSG00000260072	ENST00000566929	-4039	NA	NA	NA
5	149916770	149917701	932	*	9.4	9.54	9.25	0.29	0.00593	0.228	Intron (ENST00000255266/ENSG00000132915, intron 5 of 21)	450	149932014	149932668	655	2	ENSG00000251583	ENST00000503102	14967	NA	NA	NA
1	182087685	182088470	786	*	10.4	10.27	10.51	-0.25	0.00594	0.228	Promoter (1-2kb)	446	182086551	182090112	3562	1	ENSG00000225982	ENST00000428646	1134	NA	NA	NA
5	172801100	172801739	640	*	8.75	8.91	8.56	0.36	0.00594	0.228	Distal Intergenic	450	172816592	172819931	3340	1	ENSG00000253628	ENST00000657724	-14853	NA	NA	NA
1	203860368	203862173	1806	*	11.75	11.66	11.83	-0.18	0.00595	0.228	Promoter (<=1kb)	446	203861599	203871152	9554	1	ENSG00000182004	ENST00000414487	0	6635	SNRPE	small nuclear ribonucleoprotein polypeptide E
6	11432698	11433366	669	*	8.75	8.95	8.52	0.42	0.00595	0.228	Intron (ENST00000665550/ENSG00000242753, intron 1 of 3)	451	11417356	11481324	63969	1	ENSG00000233656	ENST00000667074	15342	NA	NA	NA
4	73844109	73844978	870	*	9.01	9.16	8.84	0.32	0.00596	0.228	Promoter (2-3kb)	449	73847866	73848829	964	1	ENSG00000250550	ENST00000510807	-2888	NA	NA	NA
8	130541448	130542049	602	*	7.78	8	7.52	0.48	0.00597	0.228	Distal Intergenic	453	130052104	130443674	391571	2	ENSG00000153317	ENST00000518721	-97774	50807	ASAP1	ArfGAP with SH3 domain, ankyrin repeat and PH domain 1
17	38958183	38959188	1006	*	8.75	8.92	8.56	0.36	0.00597	0.228	Intron (ENST00000378079/ENSG00000204952, intron 3 of 10)	462	38936432	38967403	30972	2	ENSG00000204952	ENST00000378079	8215	494188	FBXO47	F-box protein 47
15	58065056	58066832	1777	*	10.11	9.99	10.22	-0.24	0.00597	0.229	Promoter (<=1kb)	460	57953424	58065923	112500	2	ENSG00000128918	ENST00000537372	0	8854	ALDH1A2	aldehyde dehydrogenase 1 family member A2
16	68022354	68023960	1607	*	10.45	10.33	10.57	-0.23	0.00598	0.229	Promoter (<=1kb)	461	68023253	68079320	56068	1	ENSG00000167264	ENST00000358896	0	54920	DUS2	dihydrouridine synthase 2
4	1029977	1030496	520	*	9.58	9.44	9.72	-0.27	0.00599	0.229	Promoter (2-3kb)	449	1027678	1028972	1295	1	ENSG00000250259	ENST00000503095	2299	NA	NA	NA
12	110402667	110403898	1232	*	9.35	9.19	9.49	-0.29	0.00599	0.229	Promoter (<=1kb)	457	110372900	110403730	30831	2	ENSG00000196510	ENST00000455511	0	51434	ANAPC7	anaphase promoting complex subunit 7
2	28355424	28356986	1563	*	11.78	11.69	11.87	-0.18	0.006	0.229	Distal Intergenic	447	28392448	28408802	16355	1	ENSG00000075426	ENST00000460736	-35462	2355	FOSL2	FOS like 2, AP-1 transcription factor subunit
8	97868591	97869894	1304	*	10.96	10.86	11.05	-0.2	0.006	0.229	Promoter (<=1kb)	453	97868840	98035978	167139	1	ENSG00000132561	ENST00000521689	0	4147	MATN2	matrilin 2
7	148940626	148941341	716	*	10.1	9.97	10.22	-0.25	0.00601	0.229	Promoter (<=1kb)	452	148940265	148941228	964	2	ENSG00000286180	ENST00000652060	0	NA	NA	NA
12	27013609	27014925	1317	*	11.23	11.13	11.32	-0.19	0.00602	0.229	Promoter (<=1kb)	457	26971579	27014384	42806	2	ENSG00000064115	ENST00000343028	0	51768	TM7SF3	transmembrane 7 superfamily member 3
16	1272034	1272902	869	*	9.04	8.86	9.2	-0.33	0.00602	0.229	Downstream (<1kb)	461	1273751	1276522	2772	2	ENSG00000261564	ENST00000562876	3620	NA	NA	NA
19	10269467	10270049	583	*	8.37	8.15	8.57	-0.42	0.00604	0.23	Promoter (1-2kb)	464	10271093	10285583	14491	1	ENSG00000090339	ENST00000423829	-1044	3383	ICAM1	intercellular adhesion molecule 1
2	11863630	11864426	797	*	9.8	9.66	9.92	-0.26	0.00604	0.23	Promoter (1-2kb)	447	11865885	12309959	444075	1	ENSG00000224184	ENST00000438292	-1459	100506457	MIR3681HG	MIR3681 host gene
7	92832818	92834289	1472	*	11.71	11.62	11.79	-0.17	0.00605	0.23	Promoter (<=1kb)	452	92604921	92833917	228997	2	ENSG00000105810	ENST00000265734	0	1021	CDK6	cyclin dependent kinase 6
2	20490687	20491181	495	*	8.72	8.53	8.89	-0.36	0.00605	0.23	Distal Intergenic	447	20480844	20480955	112	1	ENSG00000200829	ENST00000363959	9843	NA	NA	NA
16	24279809	24280744	936	*	9.6	9.45	9.73	-0.28	0.00606	0.23	Intron (ENST00000005284/ENSG00000006116, intron 1 of 3)	461	24256335	24362412	106078	1	ENSG00000006116	ENST00000005284	23474	10368	CACNG3	calcium voltage-gated channel auxiliary subunit gamma 3
1	83508414	83509187	774	*	10.65	10.54	10.75	-0.21	0.00607	0.23	Distal Intergenic	446	83446068	83480024	33957	1	ENSG00000231364	ENST00000664539	62346	NA	NA	NA
6	44456283	44457184	902	*	8.93	9.09	8.75	0.34	0.00607	0.23	Distal Intergenic	451	44435641	44435722	82	1	ENSG00000266619	ENST00000583943	20642	100616352	MIR4642	microRNA 4642
7	6374055	6375106	1052	*	11.51	11.71	11.28	0.43	0.00607	0.23	Promoter (<=1kb)	452	6374527	6403967	29441	1	ENSG00000136238	ENST00000348035	0	5879	RAC1	Rac family small GTPase 1
9	68704689	68706074	1386	*	10.38	10.26	10.5	-0.23	0.00608	0.23	Promoter (<=1kb)	454	68705240	69009176	303937	1	ENSG00000107242	ENST00000265382	0	8395	PIP5K1B	phosphatidylinositol-4-phosphate 5-kinase type 1 beta
10	87203290	87204282	993	*	8.98	8.81	9.14	-0.33	0.00608	0.23	Promoter (<=1kb)	455	87203717	87206615	2899	1	ENSG00000287077	ENST00000665147	0	NA	NA	NA
12	45674386	45675276	891	*	9.74	9.87	9.61	0.26	0.00608	0.23	Distal Intergenic	457	45718046	45727775	9730	2	ENSG00000273015	ENST00000609803	52499	NA	NA	NA
7	158587534	158588363	830	*	8.84	9.01	8.65	0.36	0.00609	0.23	Promoter (<=1kb)	452	157539056	158587773	1048718	2	ENSG00000155093	ENST00000389413	0	5799	PTPRN2	protein tyrosine phosphatase receptor type N2
17	40647261	40648942	1682	*	10.87	10.76	10.98	-0.22	0.00609	0.23	Promoter (<=1kb)	462	40624962	40647818	22857	2	ENSG00000073584	ENST00000348513	0	6605	SMARCE1	SWI/SNF related, matrix associated, actin dependent regulator of chromatin, subfamily e, member 1
5	148623486	148624313	828	*	9.22	9.37	9.06	0.31	0.00609	0.23	Intron (ENST00000521530/ENSG00000164270, intron 1 of 5)	450	148451170	148637014	185845	2	ENSG00000164270	ENST00000522588	12701	3360	HTR4	5-hydroxytryptamine receptor 4
22	45645471	45646231	761	*	9.18	9.02	9.33	-0.31	0.00609	0.23	Distal Intergenic	467	45657019	45680130	23112	1	ENSG00000280383	ENST00000623075	-10788	NA	NA	NA
2	95330154	95331144	991	*	9.99	9.85	10.11	-0.26	0.0061	0.23	Intron (ENST00000295225/ENSG00000115041, intron 2 of 8)	447	95346728	95384049	37322	1	ENSG00000115041	ENST00000468529	-15584	30818	KCNIP3	potassium voltage-gated channel interacting protein 3
9	134406456	134407824	1369	*	12.23	12.14	12.32	-0.18	0.0061	0.23	Intron (ENST00000481739/ENSG00000186350, intron 2 of 9)	454	134386122	134401882	15761	1	ENSG00000186350	ENST00000649020	20334	6256	RXRA	retinoid X receptor alpha
2	130797364	130798631	1268	*	11.79	11.7	11.88	-0.17	0.00611	0.23	Distal Intergenic	447	130776646	130776957	312	1	ENSG00000232503	ENST00000455007	20718	NA	NA	NA
18	68177881	68178657	777	*	9.72	9.85	9.58	0.27	0.00611	0.23	Distal Intergenic	463	68102087	68114878	12792	1	ENSG00000264869	ENST00000580057	75794	NA	NA	NA
13	82963187	82963999	813	*	7.84	8.07	7.57	0.5	0.00612	0.23	Intron (ENST00000663739/ENSG00000286385, intron 2 of 2)	458	82778208	83102335	324128	2	ENSG00000286385	ENST00000663739	138336	NA	NA	NA
9	129656680	129657239	560	*	8.84	9	8.66	0.34	0.00613	0.23	Distal Intergenic	454	129665647	129722674	57028	1	ENSG00000167157	ENST00000372469	-8408	51450	PRRX2	paired related homeobox 2
3	191499408	191500300	893	*	8.75	8.56	8.92	-0.36	0.00613	0.23	Intron (ENST00000657540/ENSG00000223812, intron 1 of 5)	448	191461163	191461456	294	1	ENSG00000253548	ENST00000518817	38245	152138	PYDC2	pyrin domain containing 2
16	30786204	30787842	1639	*	11.08	10.97	11.18	-0.21	0.00613	0.23	Promoter (<=1kb)	461	30778456	30787205	8750	2	ENSG00000102870	ENST00000262525	0	23361	ZNF629	zinc finger protein 629
12	126719893	126720935	1043	*	9.91	9.78	10.03	-0.26	0.00613	0.23	Promoter (2-3kb)	457	126723412	126746256	22845	1	ENSG00000189238	ENST00000667256	-2477	100507206	LINC00943	long intergenic non-protein coding RNA 943
7	54995561	54996660	1100	*	10.54	10.64	10.43	0.22	0.00613	0.23	Distal Intergenic	452	55019017	55211628	192612	1	ENSG00000146648	ENST00000275493	-22357	1956	EGFR	epidermal growth factor receptor
15	90648172	90648989	818	*	10.08	9.95	10.2	-0.25	0.00615	0.23	Promoter (1-2kb)	460	90650631	90651103	473	1	ENSG00000278370	ENST00000621212	-1642	NA	NA	NA
2	88169968	88170899	932	*	8.92	9.09	8.73	0.36	0.00618	0.231	Promoter (<=1kb)	447	88170274	88186585	16312	1	ENSG00000144115	ENST00000674334	0	55258	THNSL2	threonine synthase like 2
2	186693650	186694830	1181	*	10.95	10.84	11.04	-0.2	0.00618	0.231	Promoter (<=1kb)	447	186694060	186765959	71900	1	ENSG00000144369	ENST00000304698	0	165215	FAM171B	family with sequence similarity 171 member B
5	173201592	173202848	1257	*	10.75	10.85	10.64	0.21	0.00618	0.231	Distal Intergenic	450	173225836	173226423	588	2	ENSG00000254200	ENST00000521552	23575	NA	NA	NA
13	76293197	76294193	997	*	9.22	9.38	9.05	0.32	0.00619	0.231	Distal Intergenic	458	76134931	76135225	295	1	ENSG00000243274	ENST00000468302	158266	NA	NA	NA
5	17852247	17853254	1008	*	8.48	8.65	8.28	0.38	0.00619	0.231	Promoter (2-3kb)	450	17850194	17926947	76754	1	ENSG00000249937	ENST00000657374	2053	NA	NA	NA
21	44294274	44295612	1339	*	10.36	10.25	10.47	-0.22	0.00619	0.231	Exon (ENST00000530812/ENSG00000160224, exon 10 of 12)	466	44290755	44297989	7235	1	ENSG00000160224	ENST00000397994	3519	326	AIRE	autoimmune regulator
5	39624427	39624857	431	*	8.41	8.6	8.2	0.4	0.0062	0.231	Distal Intergenic	450	39571478	39572639	1162	2	ENSG00000251515	ENST00000503137	-51788	NA	NA	NA
2	27032330	27033791	1462	*	10.9	10.8	11	-0.2	0.0062	0.231	Promoter (<=1kb)	447	27032910	27035481	2572	1	ENSG00000119777	ENST00000495312	0	54867	TMEM214	transmembrane protein 214
4	39035914	39036684	771	*	9.6	9.73	9.46	0.27	0.0062	0.231	Promoter (2-3kb)	449	38993735	39032922	39188	2	ENSG00000121895	ENST00000344606	-2992	80008	TMEM156	transmembrane protein 156
3	14433954	14435021	1068	*	10.61	10.5	10.72	-0.22	0.0062	0.231	Promoter (1-2kb)	448	14432670	14445816	13147	1	ENSG00000131389	ENST00000452775	1284	6533	SLC6A6	solute carrier family 6 member 6
5	174159339	174160086	748	*	8.69	8.87	8.49	0.38	0.00621	0.231	Intron (ENST00000521585/ENSG00000170091, intron 3 of 4)	450	174173101	174181814	8714	1	ENSG00000254011	ENST00000520587	-13015	NA	NA	NA
12	58310436	58311501	1066	*	10.32	10.43	10.2	0.23	0.00622	0.231	Distal Intergenic	457	58244378	58244865	488	1	ENSG00000241423	ENST00000479921	66058	NA	NA	NA
17	79844042	79844345	304	*	8.82	8.64	8.98	-0.35	0.00622	0.231	Distal Intergenic	462	79833156	79839440	6285	2	ENSG00000141582	ENST00000269397	-4602	8535	CBX4	chromobox 4
5	17910067	17910900	834	*	9.52	9.66	9.35	0.31	0.00623	0.231	Intron (ENST00000511596/ENSG00000249937, intron 2 of 4)	450	17919158	17930487	11330	1	ENSG00000249937	ENST00000661046	-8258	NA	NA	NA
8	23162950	23164421	1472	*	11.06	10.96	11.16	-0.19	0.00624	0.232	Promoter (<=1kb)	453	23135588	23164027	28440	2	ENSG00000173530	ENST00000312584	0	8793	TNFRSF10D	TNF receptor superfamily member 10d
22	20156643	20157522	880	*	9.15	8.97	9.31	-0.35	0.00625	0.232	Distal Intergenic	467	20148416	20151055	2640	2	ENSG00000234409	ENST00000439765	-5588	388849	CCDC188	coiled-coil domain containing 188
9	131349535	131350630	1096	*	10.8	10.69	10.91	-0.21	0.00626	0.232	Intron (ENST00000645295/ENSG00000160539, intron 4 of 4)	454	131370933	131372514	1582	1	ENSG00000285287	ENST00000644453	-20303	NA	NA	NA
2	173151573	173152416	844	*	8.85	9.01	8.67	0.34	0.00626	0.232	Intron (ENST00000539448/ENSG00000091436, intron 2 of 11)	447	173160010	173191177	31168	1	ENSG00000091436	ENST00000480606	-7594	51776	MAP3K20	mitogen-activated protein kinase kinase kinase 20
10	95183252	95184193	942	*	10.64	10.53	10.75	-0.21	0.00626	0.232	Promoter (<=1kb)	455	95183653	95184217	565	1	ENSG00000225533	ENST00000451083	0	NA	NA	NA
1	206469481	206471482	2002	*	11.44	11.34	11.53	-0.19	0.00626	0.232	Promoter (<=1kb)	446	206470476	206478297	7822	1	ENSG00000263528	ENST00000605818	0	9641	IKBKE	inhibitor of nuclear factor kappa B kinase subunit epsilon
X	130097621	130098421	801	*	9.92	9.78	10.04	-0.25	0.00627	0.232	Intron (ENST00000308167/ENSG00000102034, intron 1 of 8)	468	130074105	130110361	36257	2	ENSG00000102034	ENST00000434609	11940	2000	ELF4	E74 like ETS transcription factor 4
17	79087408	79088111	704	*	9.28	9.12	9.43	-0.3	0.00627	0.232	Promoter (2-3kb)	462	79085290	79085850	561	1	ENSG00000167280	ENST00000585160	2118	64772	ENGASE	endo-beta-N-acetylglucosaminidase
8	51457811	51458338	528	*	8.87	9.03	8.69	0.34	0.00628	0.232	Intron (ENST00000356297/ENSG00000147485, intron 8 of 22)	453	51435602	51436509	908	1	ENSG00000254025	ENST00000521785	22209	NA	NA	NA
1	55694061	55694944	884	*	9.97	9.84	10.09	-0.25	0.00628	0.232	Intron (ENST00000643167/ENSG00000234810, intron 3 of 3)	446	55581109	55738391	157283	1	ENSG00000234810	ENST00000671349	112952	NA	NA	NA
7	37732328	37732860	533	*	8.49	8.28	8.68	-0.4	0.00628	0.232	Intron (ENST00000461610/ENSG00000187037, intron 2 of 3)	452	37740394	37741311	918	1	ENSG00000187037	ENST00000334425	-7534	353345	GPR141	G protein-coupled receptor 141
15	77991869	77992519	651	*	10.03	9.89	10.16	-0.27	0.00629	0.232	Promoter (<=1kb)	460	77993405	77995289	1885	1	ENSG00000259792	ENST00000562716	-886	NA	NA	NA
1	63261382	63262482	1101	*	10.18	10.06	10.29	-0.23	0.0063	0.232	Promoter (<=1kb)	446	63262113	63262707	595	1	ENSG00000223683	ENST00000429660	0	NA	NA	NA
8	58945415	58946844	1430	*	9.41	9.55	9.26	0.29	0.00632	0.232	Intron (ENST00000361421/ENSG00000198846, intron 2 of 8)	453	58991720	58992938	1219	2	ENSG00000254048	ENST00000518011	46094	NA	NA	NA
16	88737163	88737983	821	*	10.08	9.95	10.19	-0.24	0.00632	0.232	Promoter (<=1kb)	461	88736800	88741425	4626	1	ENSG00000224888	ENST00000567968	363	NA	NA	NA
17	19507036	19508645	1610	*	11.7	11.61	11.79	-0.18	0.00632	0.232	Intron (ENST00000584348/ENSG00000142494, intron 1 of 6)	462	19496943	19497528	586	1	ENSG00000228331	ENST00000422360	10093	NA	NA	NA
15	50181854	50183178	1325	*	10.94	10.83	11.04	-0.21	0.00633	0.232	Promoter (<=1kb)	460	50047392	50182817	135426	2	ENSG00000104043	ENST00000558829	0	79895	ATP8B4	ATPase phospholipid transporting 8B4 (putative)
17	39668203	39668708	506	*	9.67	9.53	9.79	-0.27	0.00633	0.232	Promoter (<=1kb)	462	39668453	39670475	2023	1	ENSG00000141744	ENST00000269582	0	5409	PNMT	phenylethanolamine N-methyltransferase
13	72205739	72206164	426	*	7.66	7.9	7.38	0.52	0.00635	0.233	Distal Intergenic	458	72453902	72453967	66	2	ENSG00000212377	ENST00000391075	247803	NA	NA	NA
5	31197107	31197604	498	*	9.14	9.29	8.97	0.32	0.00636	0.233	Intron (ENST00000265071/ENSG00000113361, intron 1 of 11)	450	31193769	31251854	58086	1	ENSG00000113361	ENST00000506396	3338	1004	CDH6	cadherin 6
9	68779501	68780708	1208	*	10.87	10.77	10.97	-0.2	0.00637	0.233	Promoter (<=1kb)	454	68780065	68785566	5502	1	ENSG00000187866	ENST00000394264	0	116224	FAM122A	family with sequence similarity 122A
17	30093480	30094055	576	*	8.17	7.94	8.37	-0.43	0.00638	0.233	Intron (ENST00000394835/ENSG00000176927, intron 22 of 22)	462	30087139	30092156	5018	1	ENSG00000176927	ENST00000582953	6341	374786	EFCAB5	EF-hand calcium binding domain 5
13	114004721	114005746	1026	*	8.83	8.99	8.65	0.34	0.00638	0.233	Intron (ENST00000334062/ENSG00000185989, intron 18 of 23)	458	114021409	114036193	14785	2	ENSG00000185989	ENST00000542651	30447	22821	RASA3	RAS p21 protein activator 3
15	90956057	90957739	1683	*	11.58	11.48	11.68	-0.2	0.00639	0.233	Promoter (<=1kb)	460	90956740	90961769	5030	1	ENSG00000166965	ENST00000556333	0	91433	RCCD1	RCC1 domain containing 1
5	72248243	72249069	827	*	10.08	10.21	9.94	0.27	0.00639	0.233	Intron (ENST00000261413/ENSG00000113048, intron 4 of 10)	450	72223803	72238130	14328	2	ENSG00000113048	ENST00000522562	-10113	23107	MRPS27	mitochondrial ribosomal protein S27
2	45182552	45183443	892	*	10.21	10.08	10.33	-0.24	0.00641	0.234	Intron (ENST00000652791/ENSG00000286728, intron 1 of 3)	447	45174340	45175211	872	2	ENSG00000205054	ENST00000413669	-7341	400952	LINC01121	long intergenic non-protein coding RNA 1121
17	50297265	50297980	716	*	8.72	8.53	8.89	-0.36	0.00642	0.234	Distal Intergenic	462	50281577	50287855	6279	2	ENSG00000251179	ENST00000508851	-9410	103752589	TMEM92-AS1	TMEM92 antisense RNA 1
6	112468316	112468808	493	*	8.89	9.05	8.7	0.35	0.00642	0.234	Distal Intergenic	451	112476538	112481636	5099	2	ENSG00000232299	ENST00000446322	12828	NA	NA	NA
1	35717759	35719355	1597	*	11.97	11.89	12.06	-0.17	0.00643	0.234	Promoter (<=1kb)	446	35713877	35718884	5008	2	ENSG00000142686	ENST00000270815	0	127703	C1orf216	chromosome 1 open reading frame 216
1	201253798	201255060	1263	*	9.82	9.68	9.95	-0.27	0.00643	0.234	Distal Intergenic	446	201283452	201332993	49542	1	ENSG00000081277	ENST00000263946	-28392	5317	PKP1	plakophilin 1
1	220786401	220787745	1345	*	11.81	11.71	11.9	-0.19	0.00644	0.234	Promoter (<=1kb)	446	220786913	220819659	32747	1	ENSG00000186205	ENST00000366910	0	64757	2001-03-01	mitochondrial amidoxime reducing component 1
9	115349130	115349954	825	*	8.05	8.26	7.81	0.44	0.00644	0.234	Intron (ENST00000374016/ENSG00000173077, intron 4 of 7)	454	115400346	115401315	970	1	ENSG00000173077	ENST00000614246	-50392	50514	2001-12-01	deleted in esophageal cancer 1
5	62082320	62082885	566	*	8.04	8.25	7.8	0.45	0.00644	0.234	Distal Intergenic	450	62146665	62146946	282	1	ENSG00000251983	ENST00000516174	-63780	NA	NA	NA
1	15523887	15525536	1650	*	12.71	12.82	12.6	0.22	0.00645	0.235	Promoter (<=1kb)	446	15490832	15524445	33614	2	ENSG00000132906	ENST00000546424	0	842	CASP9	caspase 9
4	122666219	122667345	1127	*	9.69	9.82	9.55	0.27	0.00645	0.235	Intron (ENST00000417927/ENSG00000227145, intron 10 of 10)	449	122700445	122708788	8344	1	ENSG00000287692	ENST00000660031	-33100	NA	NA	NA
22	36238642	36240114	1473	*	10.83	10.73	10.92	-0.2	0.00646	0.235	Promoter (<=1kb)	467	36226209	36239527	13319	2	ENSG00000128335	ENST00000358502	0	23780	APOL2	apolipoprotein L2
1	109239462	109240143	682	*	8.16	7.93	8.36	-0.43	0.00647	0.235	Distal Intergenic	446	109236231	109238169	1939	1	ENSG00000031698	ENST00000468588	3231	6301	SARS1	seryl-tRNA synthetase 1
7	54560244	54561349	1106	*	9.37	9.51	9.22	0.29	0.00647	0.235	Intron (ENST00000407838/ENSG00000170419, intron 4 of 4)	452	54556970	54571726	14757	1	ENSG00000224223	ENST00000456049	3274	285878	VSTM2A-OT1	VSTM2A overlapping transcript 1
20	49968704	49969219	516	*	7.71	7.94	7.44	0.5	0.00647	0.235	Promoter (2-3kb)	465	49972106	49972212	107	1	ENSG00000206710	ENST00000383983	-2887	NA	NA	NA
2	24359716	24360980	1265	*	10.83	10.72	10.94	-0.21	0.00648	0.235	Promoter (<=1kb)	447	24202864	24360309	157446	2	ENSG00000198399	ENST00000361999	0	50618	ITSN2	intersectin 2
5	127878209	127878508	300	*	7.7	7.42	7.93	-0.51	0.00649	0.235	Intron (ENST00000514853/ENSG00000230561, intron 6 of 6)	450	127838486	127857804	19319	2	ENSG00000250603	ENST00000507509	-20405	NA	NA	NA
19	2087015	2087555	541	*	8.42	8.61	8.19	0.42	0.00649	0.235	Promoter (1-2kb)	464	2078446	2085652	7207	2	ENSG00000172081	ENST00000586676	-1363	126308	MOB3A	MOB kinase activator 3A
7	116776538	116777220	683	*	9.75	9.88	9.61	0.27	0.0065	0.235	Intron (ENST00000318493/ENSG00000105976, intron 15 of 20)	452	116769666	116775072	5407	1	ENSG00000105976	ENST00000454623	6872	4233	MET	MET proto-oncogene, receptor tyrosine kinase
2	207727207	207727789	583	*	8.27	8.46	8.04	0.42	0.0065	0.235	Intron (ENST00000392209/ENSG00000163249, intron 4 of 10)	447	207742274	207761839	19566	1	ENSG00000163249	ENST00000420321	-14485	151195	CCNYL1	cyclin Y like 1
5	95834554	95835305	752	*	10.74	10.63	10.85	-0.22	0.0065	0.235	Promoter (<=1kb)	450	95834424	95835046	623	2	ENSG00000251000	ENST00000514941	0	NA	NA	NA
3	51384259	51385848	1590	*	12.08	11.98	12.18	-0.19	0.00652	0.235	Promoter (<=1kb)	448	51385291	51389397	4107	1	ENSG00000145050	ENST00000528157	0	7873	MANF	mesencephalic astrocyte derived neurotrophic factor
12	44372249	44372896	648	*	7.66	7.89	7.38	0.51	0.00652	0.235	Intron (ENST00000266534/ENSG00000139173, intron 6 of 7)	457	44318295	44389760	71466	1	ENSG00000139173	ENST00000546978	53954	84216	TMEM117	transmembrane protein 117
1	31575461	31576829	1369	*	11	10.89	11.09	-0.2	0.00652	0.235	Promoter (<=1kb)	446	31576485	31587682	11198	1	ENSG00000142910	ENST00000457433	0	64129	TINAGL1	tubulointerstitial nephritis antigen like 1
5	111223564	111224976	1413	*	11.43	11.33	11.52	-0.19	0.00654	0.235	Promoter (<=1kb)	450	111223653	111394749	171097	1	ENSG00000152495	ENST00000508074	0	814	CAMK4	calcium/calmodulin dependent protein kinase IV
4	143335684	143337952	2269	*	11.88	11.79	11.97	-0.19	0.00656	0.236	Promoter (<=1kb)	449	143336762	143474568	137807	1	ENSG00000109458	ENST00000262995	0	2549	GAB1	GRB2 associated binding protein 1
13	43023140	43024341	1202	*	9.92	9.79	10.04	-0.25	0.00657	0.236	Promoter (<=1kb)	458	43023203	43078877	55675	1	ENSG00000120675	ENST00000474320	0	29103	DNAJC15	DnaJ heat shock protein family (Hsp40) member C15
14	100533305	100535055	1751	*	11.12	11.02	11.21	-0.19	0.00657	0.236	Downstream (2-3kb)	459	100538939	100540409	1471	1	ENSG00000259031	ENST00000553301	-3884	NA	NA	NA
13	113584177	113585677	1501	*	11.67	11.76	11.57	0.19	0.00658	0.236	Promoter (<=1kb)	458	113584721	113633285	48565	1	ENSG00000198176	ENST00000475254	0	7027	TFDP1	transcription factor Dp-1
6	122651587	122652182	596	*	8.42	8.22	8.6	-0.39	0.0066	0.237	Promoter (<=1kb)	451	122652732	122726373	73642	1	ENSG00000135549	ENST00000258014	-550	5570	PKIB	cAMP-dependent protein kinase inhibitor beta
5	93307419	93308245	827	*	8.44	8.62	8.23	0.38	0.0066	0.237	Distal Intergenic	450	93267429	93268425	997	1	ENSG00000213730	ENST00000511220	39990	NA	NA	NA
12	65656472	65657444	973	*	9.38	9.52	9.23	0.29	0.0066	0.237	Intron (ENST00000540875/ENSG00000256915, intron 2 of 2)	457	65645992	65646462	471	2	ENSG00000213344	ENST00000393579	-10010	NA	NA	NA
12	52307833	52309152	1320	*	11.32	11.21	11.42	-0.21	0.0066	0.237	Promoter (<=1kb)	457	52306616	52308371	1756	2	ENSG00000257829	ENST00000552441	0	NA	NA	NA
5	53406514	53407230	717	*	8.81	8.97	8.63	0.34	0.00661	0.237	Distal Intergenic	450	53413504	53414260	757	1	ENSG00000240052	ENST00000477321	-6274	NA	NA	NA
17	81601489	81602073	585	*	8.72	8.52	8.89	-0.37	0.00661	0.237	Intron (ENST00000331134/ENSG00000182446, intron 8 of 16)	462	81588091	81597319	9229	2	ENSG00000182446	ENST00000572351	-4170	55666	NPLOC4	NPL4 homolog, ubiquitin recognition factor
20	17968189	17969579	1391	*	11.11	11.02	11.2	-0.19	0.00661	0.237	Promoter (<=1kb)	465	17941597	17968800	27204	2	ENSG00000089006	ENST00000490175	0	27131	SNX5	sorting nexin 5
3	142888144	142889397	1254	*	11	10.89	11.1	-0.2	0.00664	0.237	Promoter (<=1kb)	448	142817874	142889083	71210	2	ENSG00000163710	ENST00000295992	0	26577	PCOLCE2	procollagen C-endopeptidase enhancer 2
17	1486803	1487442	640	*	11.07	10.97	11.16	-0.19	0.00664	0.237	Promoter (<=1kb)	462	1482489	1486921	4433	2	ENSG00000197879	ENST00000573853	0	4641	MYO1C	myosin IC
14	103121073	103123532	2460	*	12.68	12.59	12.75	-0.16	0.00664	0.237	Promoter (<=1kb)	459	103121476	103137439	15964	1	ENSG00000185215	ENST00000333007	0	7127	TNFAIP2	TNF alpha induced protein 2
2	186574884	186576134	1251	*	10.77	10.87	10.66	0.21	0.00664	0.237	Distal Intergenic	447	186590056	186680901	90846	1	ENSG00000138448	ENST00000261023	-13922	3685	ITGAV	integrin subunit alpha V
7	76420968	76421492	525	*	9.58	9.72	9.43	0.29	0.00664	0.237	Intron (ENST00000336517/ENSG00000188372, intron 1 of 8)	452	76424950	76442069	17120	1	ENSG00000188372	ENST00000394857	-3458	7784	ZP3	zona pellucida glycoprotein 3
9	35179445	35180451	1007	*	8.53	8.71	8.33	0.38	0.00664	0.237	Intron (ENST00000617908/ENSG00000198722, intron 1 of 40)	454	35162104	35404054	241951	1	ENSG00000198722	ENST00000634487	17341	10497	UNC13B	unc-13 homolog B
4	183658554	183659798	1245	*	11.04	10.92	11.16	-0.24	0.00665	0.237	Promoter (<=1kb)	449	183659267	183713594	54328	1	ENSG00000168538	ENST00000357207	0	60684	TRAPPC11	trafficking protein particle complex 11
8	135456617	135458086	1470	*	10.9	11	10.79	0.21	0.00665	0.237	Promoter (<=1kb)	453	135457456	135647610	190155	1	ENSG00000131773	ENST00000355849	0	10656	KHDRBS3	KH RNA binding domain containing, signal transduction associated 3
15	82832379	82833361	983	*	10.44	10.54	10.33	0.21	0.00667	0.237	Exon (ENST00000286760/ENSG00000156232, exon 10 of 10)	460	82817920	82826794	8875	1	ENSG00000156232	ENST00000560964	14459	123720	WHAMM	WASP homolog associated with actin, golgi membranes and microtubules
1	173590561	173591122	562	*	7.95	8.16	7.71	0.46	0.00667	0.237	Intron (ENST00000431459/ENSG00000238272, intron 1 of 2)	446	173597906	173601752	3847	2	ENSG00000162753	ENST00000476568	10630	284525	SLC9C2	solute carrier family 9 member C2 (putative)
7	116797621	116798027	407	*	8.26	8.45	8.04	0.41	0.00668	0.238	3' UTR	452	116811070	116898786	87717	1	ENSG00000198898	ENST00000464223	-13043	830	CAPZA2	capping actin protein of muscle Z-line subunit alpha 2
2	205684959	205686312	1354	*	11.13	11.03	11.22	-0.19	0.0067	0.238	Promoter (<=1kb)	447	205685793	205697734	11942	1	ENSG00000118257	ENST00000483917	0	8828	NRP2	neuropilin 2
17	50117097	50117710	614	*	9.36	9.21	9.5	-0.29	0.0067	0.238	Promoter (<=1kb)	462	50111336	50117799	6464	2	ENSG00000167100	ENST00000508892	89	201191	SAMD14	sterile alpha motif domain containing 14
1	159915866	159917026	1161	*	11.83	11.74	11.91	-0.18	0.00671	0.238	Downstream (1-2kb)	446	159910094	159910554	461	2	ENSG00000279430	ENST00000623350	-5312	NA	NA	NA
16	30774911	30776938	2028	*	12.07	11.99	12.16	-0.17	0.00672	0.238	Promoter (<=1kb)	461	30773532	30776033	2502	2	ENSG00000280211	ENST00000623557	0	NA	NA	NA
15	81940384	81941763	1380	*	8.91	9.07	8.74	0.33	0.00673	0.238	Intron (ENST00000559299/ENSG00000259692, intron 3 of 7)	460	81816761	81995666	178906	2	ENSG00000259692	ENST00000559299	53903	NA	NA	NA
6	150297252	150298029	778	*	8.93	9.08	8.76	0.33	0.00674	0.239	Distal Intergenic	451	150326623	150326763	141	2	ENSG00000201628	ENST00000364758	28734	NA	NA	NA
5	21774742	21775489	748	*	9.42	9.56	9.27	0.29	0.00674	0.239	Intron (ENST00000522350/ENSG00000253766, intron 3 of 3)	450	21882585	21884310	1726	1	ENSG00000213430	ENST00000503199	-107096	NA	NA	NA
9	19493098	19493775	678	*	8.19	7.94	8.4	-0.46	0.00674	0.239	Distal Intergenic	454	19461160	19464524	3365	2	ENSG00000231909	ENST00000438342	-28574	NA	NA	NA
20	63536963	63538478	1516	*	12.74	12.65	12.83	-0.17	0.00675	0.239	Promoter (<=1kb)	465	63528001	63537376	9376	2	ENSG00000101213	ENST00000542869	0	5753	PTK6	protein tyrosine kinase 6
20	51306505	51307359	855	*	10.25	10.12	10.36	-0.23	0.00675	0.239	Distal Intergenic	465	51391409	51399219	7811	2	ENSG00000101096	ENST00000496054	91860	4773	NFATC2	nuclear factor of activated T cells 2
4	45662770	45663451	682	*	9.22	9.37	9.06	0.32	0.00675	0.239	Distal Intergenic	449	45480030	45480136	107	1	ENSG00000200720	ENST00000363850	182740	NA	NA	NA
19	48513430	48514190	761	*	10.02	9.89	10.14	-0.26	0.00677	0.239	Promoter (<=1kb)	464	48485773	48513935	28163	2	ENSG00000142235	ENST00000650440	0	114783	LMTK3	lemur tyrosine kinase 3
8	10151750	10152878	1129	*	9.86	9.98	9.72	0.26	0.00677	0.239	Intron (ENST00000317173/ENSG00000175806, intron 1 of 5)	453	10118005	10147423	29419	2	ENSG00000285675	ENST00000649481	-4327	NA	NA	NA
17	28524931	28525678	748	*	10.27	10.38	10.15	0.23	0.00677	0.239	Promoter (<=1kb)	462	28523941	28538896	14956	1	ENSG00000109101	ENST00000226247	990	8456	FOXN1	forkhead box N1
17	80518911	80519882	972	*	10.1	9.98	10.22	-0.23	0.00678	0.239	Distal Intergenic	462	80515657	80515812	156	1	ENSG00000271340	ENST00000603167	3254	NA	NA	NA
9	105007007	105007623	617	*	7.79	8.02	7.53	0.49	0.00678	0.239	Distal Intergenic	454	104990149	104991818	1670	2	ENSG00000230013	ENST00000670487	-15189	107987106	CT70	cancer/testis associated transcript 70
4	94412266	94413665	1400	*	9.76	9.89	9.63	0.26	0.00679	0.239	Distal Intergenic	449	94451857	94588216	136360	1	ENSG00000163110	ENST00000318007	-38192	10611	PDLIM5	PDZ and LIM domain 5
18	58262893	58264046	1154	*	9.05	9.2	8.88	0.31	0.00679	0.239	Intron (ENST00000400345/ENSG00000049759, intron 5 of 30)	463	58255440	58396705	141266	1	ENSG00000049759	ENST00000635997	7453	23327	NEDD4L	NEDD4 like E3 ubiquitin protein ligase
5	79513116	79514972	1857	*	12.11	12	12.2	-0.2	0.00679	0.239	Promoter (<=1kb)	450	79372636	79514134	141499	2	ENSG00000152413	ENST00000334082	0	9456	HOMER1	homer scaffold protein 1
13	38141612	38142153	542	*	7.68	7.91	7.41	0.5	0.0068	0.239	Promoter (1-2kb)	458	38050817	38143232	92416	2	ENSG00000223685	ENST00000434565	1079	100874188	LINC00571	long intergenic non-protein coding RNA 571
1	23216711	23217918	1208	*	10.64	10.53	10.74	-0.21	0.00681	0.239	Distal Intergenic	446	23191895	23194729	2835	2	ENSG00000179546	ENST00000374619	-21982	3352	HTR1D	5-hydroxytryptamine receptor 1D
3	174440486	174441846	1361	*	11.39	11.3	11.48	-0.18	0.00681	0.239	Promoter (<=1kb)	448	174440945	174540748	99804	1	ENSG00000177694	ENST00000481679	0	254827	NAALADL2	N-acetylated alpha-linked acidic dipeptidase like 2
9	74760197	74760914	718	*	7.86	8.08	7.61	0.47	0.00683	0.24	Intron (ENST00000361255/ENSG00000119121, intron 27 of 38)	454	74799895	74800222	328	1	ENSG00000202217	ENST00000365347	-38981	NA	NA	NA
22	39310412	39311639	1228	*	11.13	11.04	11.22	-0.19	0.00684	0.24	Promoter (2-3kb)	467	39312884	39313705	822	2	ENSG00000100316	ENST00000464182	2066	6122	RPL3	ribosomal protein L3
1	81876810	81877856	1047	*	9.14	9.29	8.97	0.31	0.00684	0.24	Intron (ENST00000370721/ENSG00000117114, intron 5 of 24)	446	81942969	81991368	48400	1	ENSG00000117114	ENST00000449420	-65113	23266	ADGRL2	adhesion G protein-coupled receptor L2
9	137350699	137352514	1816	*	10.02	9.89	10.14	-0.25	0.00684	0.24	Promoter (<=1kb)	454	137306917	137352984	46068	2	ENSG00000187609	ENST00000487745	470	54932	EXD3	exonuclease 3'-5' domain containing 3
12	65765180	65765928	749	*	8.11	8.3	7.88	0.43	0.00686	0.24	Intron (ENST00000489520/ENSG00000241749, intron 1 of 1)	457	65758121	65758998	878	2	ENSG00000241749	ENST00000493929	-6182	204010	RPSAP52	ribosomal protein SA pseudogene 52
3	102400094	102401391	1298	*	8.91	9.06	8.73	0.33	0.00687	0.24	Intron (ENST00000491959/ENSG00000170044, intron 7 of 17)	448	102435015	102479841	44827	1	ENSG00000170044	ENST00000306176	-33624	131368	ZPLD1	zona pellucida like domain containing 1
10	86399779	86401724	1946	*	11.89	11.8	11.98	-0.18	0.00687	0.24	Promoter (<=1kb)	455	86395187	86400943	5757	2	ENSG00000287475	ENST00000670831	0	NA	NA	NA
19	7829375	7830478	1104	*	12.06	12.16	11.95	0.2	0.00688	0.24	Promoter (<=1kb)	464	7830233	7864976	34744	1	ENSG00000142459	ENST00000270530	0	115704	EVI5L	ecotropic viral integration site 5 like
1	235532368	235533216	849	*	7.94	8.15	7.69	0.46	0.00688	0.24	Distal Intergenic	446	235537520	235538041	522	1	ENSG00000235638	ENST00000433044	-4304	NA	NA	NA
7	27709601	27710256	656	*	8.44	8.62	8.24	0.38	0.00688	0.24	Distal Intergenic	452	27739331	27765982	26652	1	ENSG00000106052	ENST00000418691	-29075	8887	TAX1BP1	Tax1 binding protein 1
8	105518071	105518758	688	*	7.71	7.93	7.44	0.48	0.00688	0.24	Intron (ENST00000407775/ENSG00000169946, intron 3 of 7)	453	105528884	105803597	274714	1	ENSG00000169946	ENST00000517361	-10126	23414	ZFPM2	zinc finger protein, FOG family member 2
1	65075194	65075767	574	*	7.68	7.38	7.92	-0.54	0.00688	0.24	Promoter (2-3kb)	446	65077413	65078131	719	2	ENSG00000235804	ENST00000416486	2364	NA	NA	NA
17	82781428	82782362	935	*	9.26	9.1	9.4	-0.3	0.00688	0.24	Exon (ENST00000355528/ENSG00000141556, exon 7 of 39)	462	82795486	82796095	610	2	ENSG00000263098	ENST00000576836	13733	NA	NA	NA
X	133985402	133986093	692	*	7.82	8.06	7.52	0.54	0.00688	0.24	Promoter (<=1kb)	468	133535745	133985594	449850	2	ENSG00000147257	ENST00000370818	0	2719	GPC3	glypican 3
7	332467	333814	1348	*	11	10.89	11.11	-0.22	0.0069	0.24	Promoter (<=1kb)	452	329776	333172	3397	2	ENSG00000287342	ENST00000670013	0	105375118	LOC105375118	uncharacterized LOC105375118
2	179454232	179455418	1187	*	9.4	9.55	9.24	0.31	0.0069	0.24	Intron (ENST00000466398/ENSG00000144331, intron 8 of 12)	447	179399728	179400875	1148	2	ENSG00000237964	ENST00000482222	-53357	NA	NA	NA
X	154540958	154543185	2228	*	12.14	12.05	12.22	-0.17	0.00691	0.24	Promoter (<=1kb)	468	154541199	154561768	20570	1	ENSG00000269335	ENST00000440286	0	8517	IKBKG	inhibitor of nuclear factor kappa B kinase regulatory subunit gamma
X	133293933	133294792	860	*	9.38	9.23	9.51	-0.28	0.00692	0.24	Distal Intergenic	468	133238657	133238816	160	2	ENSG00000202199	ENST00000365329	-55117	NA	NA	NA
7	41572896	41573607	712	*	8.77	8.93	8.58	0.36	0.00693	0.24	Distal Intergenic	452	41689516	41692564	3049	2	ENSG00000122641	ENST00000464515	118957	3624	INHBA	inhibin subunit beta A
5	95283765	95285390	1626	*	10.73	10.6	10.84	-0.24	0.00693	0.24	Promoter (<=1kb)	450	94705100	95284575	579476	2	ENSG00000175471	ENST00000515393	0	79772	MCTP1	multiple C2 and transmembrane domain containing 1
7	140176646	140177778	1133	*	10.64	10.75	10.52	0.23	0.00693	0.24	Promoter (<=1kb)	452	140084746	140176983	92238	2	ENSG00000006459	ENST00000397560	0	80853	KDM7A	lysine demethylase 7A
7	18019212	18020312	1101	*	9.73	9.86	9.6	0.26	0.00694	0.241	Distal Intergenic	452	18026770	18027846	1077	2	ENSG00000229937	ENST00000506618	7534	221823	PRPS1L1	phosphoribosyl pyrophosphate synthetase 1 like 1
13	42893237	42893815	579	*	7.9	7.65	8.11	-0.46	0.00696	0.241	Intron (ENST00000313640/ENSG00000133106, intron 11 of 12)	458	42933858	42934892	1035	1	ENSG00000238025	ENST00000396712	-40043	NA	NA	NA
1	11733354	11733737	384	*	8.78	8.58	8.95	-0.37	0.00697	0.241	Promoter (2-3kb)	446	11736084	11750710	14627	1	ENSG00000177674	ENST00000376637	-2347	57085	AGTRAP	angiotensin II receptor associated protein
2	44958857	44959356	500	*	8.33	8.52	8.12	0.4	0.00697	0.241	Intron (ENST00000425325/ENSG00000225156, intron 2 of 3)	447	44954664	44968762	14099	1	ENSG00000225156	ENST00000425325	4193	NA	NA	NA
5	113606273	113606987	715	*	8.82	8.63	8.99	-0.36	0.00697	0.241	Distal Intergenic	450	113591158	113592601	1444	1	ENSG00000047188	ENST00000507567	15115	64848	YTHDC2	YTH domain containing 2
5	136028435	136029805	1371	*	11.46	11.37	11.55	-0.18	0.00698	0.241	Promoter (<=1kb)	450	136028988	136046440	17453	1	ENSG00000120708	ENST00000504185	0	7045	TGFBI	transforming growth factor beta induced
1	6438033	6438546	514	*	8.91	8.74	9.07	-0.33	0.00699	0.241	Promoter (<=1kb)	446	6437568	6440822	3255	1	ENSG00000187017	ENST00000632142	465	83715	ESPN	espin
19	6736427	6737049	623	*	10.08	9.96	10.19	-0.24	0.00706	0.244	Promoter (<=1kb)	464	6735908	6736784	877	2	ENSG00000125734	ENST00000597043	0	56927	GPR108	G protein-coupled receptor 108
6	3383441	3384043	603	*	7.86	8.08	7.61	0.47	0.00707	0.244	Intron (ENST00000436008/ENSG00000137266, intron 3 of 10)	451	3289766	3377986	88221	2	ENSG00000137266	ENST00000496753	-5455	63027	SLC22A23	solute carrier family 22 member 23
2	188475900	188476512	613	*	8.33	8.52	8.12	0.4	0.00707	0.244	Intron (ENST00000409843/ENSG00000144366, intron 2 of 12)	447	188522738	188584309	61572	1	ENSG00000144366	ENST00000476422	-46226	51454	GULP1	GULP PTB domain containing engulfment adaptor 1
7	84177794	84178451	658	*	8	8.2	7.76	0.44	0.00707	0.244	Intron (ENST00000265362/ENSG00000075213, intron 1 of 16)	452	83955777	84194789	239013	2	ENSG00000075213	ENST00000265362	16338	10371	SEMA3A	semaphorin 3A
16	25106549	25107395	847	*	10.74	10.63	10.83	-0.2	0.00709	0.244	Promoter (<=1kb)	461	25106569	25107102	534	2	ENSG00000275494	ENST00000613406	0	NA	NA	NA
1	37859009	37860599	1591	*	12	11.91	12.08	-0.17	0.00709	0.244	Promoter (<=1kb)	446	37809574	37859592	50019	2	ENSG00000188786	ENST00000373036	0	4520	MTF1	metal regulatory transcription factor 1
2	215601824	215602641	818	*	8.57	8.74	8.38	0.37	0.0071	0.244	Intron (ENST00000422353/ENSG00000237525, intron 1 of 2)	447	215620108	215621353	1246	2	ENSG00000235770	ENST00000419922	18712	646324	LINC00607	long intergenic non-protein coding RNA 607
15	67941649	67942254	606	*	9.82	9.94	9.69	0.25	0.00711	0.244	Distal Intergenic	460	67974391	67974625	235	2	ENSG00000261702	ENST00000567857	32371	NA	NA	NA
14	81946897	81947772	876	*	10.68	10.56	10.8	-0.23	0.00711	0.244	Intron (ENST00000554814/ENSG00000259035, intron 3 of 3)	459	81916231	81917888	1658	1	ENSG00000258501	ENST00000554099	30666	NA	NA	NA
12	102468170	102468803	634	*	8.81	8.63	8.97	-0.34	0.00713	0.245	Intron (ENST00000337514/ENSG00000017427, intron 2 of 3)	457	102402459	102478651	76193	2	ENSG00000017427	ENST00000424202	9848	3479	IGF1	insulin like growth factor 1
15	56040056	56041030	975	*	9.36	9.5	9.21	0.28	0.00714	0.245	Distal Intergenic	460	56029684	56029981	298	2	ENSG00000239703	ENST00000493069	-10075	NA	NA	NA
5	90488748	90489237	490	*	7.88	8.09	7.63	0.46	0.00715	0.245	Intron (ENST00000505345/ENSG00000113356, intron 3 of 3)	450	90474895	90490858	15964	1	ENSG00000113356	ENST00000514483	13853	10622	POLR3G	RNA polymerase III subunit G
10	43691514	43692656	1143	*	8.78	8.59	8.94	-0.35	0.00715	0.245	Distal Intergenic	455	43665668	43667005	1338	1	ENSG00000228426	ENST00000418426	25846	NA	NA	NA
17	41647711	41648984	1274	*	11.51	11.42	11.6	-0.17	0.00715	0.245	Distal Intergenic	462	41626327	41640199	13873	2	ENSG00000214514	ENST00000398469	-7512	284116	KRT42P	keratin 42 pseudogene
9	34701101	34702459	1359	*	10.25	10.13	10.36	-0.23	0.00716	0.245	Promoter (<=1kb)	454	34702953	34774466	71514	1	ENSG00000288583	ENST00000664167	-494	NA	NA	NA
16	87834577	87835422	846	*	10.68	10.57	10.78	-0.21	0.00716	0.245	Promoter (<=1kb)	461	87834592	87834660	69	2	ENSG00000278598	ENST00000617557	0	102465464	MIR6775	microRNA 6775
13	97975691	97977492	1802	*	12.13	12.23	12.02	0.21	0.00716	0.245	Promoter (<=1kb)	458	97976465	97989109	12645	1	ENSG00000065150	ENST00000480641	0	3843	IPO5	importin 5
1	1290230	1290501	272	*	8.91	8.73	9.07	-0.34	0.00717	0.245	3' UTR	446	1287109	1290943	3835	1	ENSG00000162572	ENST00000379099	3121	6339	SCNN1D	sodium channel epithelial 1 delta subunit
5	150544554	150545169	616	*	9.11	8.94	9.27	-0.33	0.00717	0.245	Intron (ENST00000523767/ENSG00000070614, intron 10 of 13)	450	150550414	150550899	486	1	ENSG00000070614	ENST00000624156	-5245	3340	NDST1	N-deacetylase and N-sulfotransferase 1
2	74548606	74549849	1244	*	10.72	10.61	10.83	-0.22	0.00717	0.245	Promoter (<=1kb)	447	74532414	74549663	17250	2	ENSG00000115318	ENST00000470907	0	84695	LOXL3	lysyl oxidase like 3
2	237128026	237128733	708	*	9.94	10.06	9.81	0.25	0.00719	0.245	Distal Intergenic	447	237122910	237124097	1188	2	ENSG00000224844	ENST00000416509	-3929	NA	NA	NA
14	54565093	54567542	2450	*	11.8	11.7	11.89	-0.2	0.0072	0.245	Promoter (<=1kb)	459	54566117	54567910	1794	1	ENSG00000020577	ENST00000673751	0	23034	SAMD4A	sterile alpha motif domain containing 4A
2	36486540	36487054	515	*	8.82	9	8.62	0.38	0.00721	0.246	Intron (ENST00000280527/ENSG00000150938, intron 7 of 16)	447	36479543	36499412	19870	1	ENSG00000150938	ENST00000481321	6997	51232	CRIM1	cysteine rich transmembrane BMP regulator 1
2	30446751	30448147	1397	*	10.51	10.4	10.61	-0.22	0.00721	0.246	Promoter (<=1kb)	447	30447226	30552549	105324	1	ENSG00000172954	ENST00000466477	0	253558	LCLAT1	lysocardiolipin acyltransferase 1
4	152259836	152260261	426	*	8.24	8.43	8.02	0.4	0.00722	0.246	Distal Intergenic	449	152264150	152264445	296	2	ENSG00000244544	ENST00000476053	4184	NA	NA	NA
5	179795314	179796918	1605	*	11.92	11.83	12	-0.18	0.00723	0.246	Promoter (<=1kb)	450	179795555	179796375	821	1	ENSG00000213316	ENST00000509898	0	4056	LTC4S	leukotriene C4 synthase
3	31377032	31377715	684	*	9.27	9.41	9.12	0.29	0.00724	0.246	Distal Intergenic	448	31452832	31455894	3063	1	ENSG00000227339	ENST00000411753	-75117	NA	NA	NA
1	11838148	11839010	863	*	9.1	8.93	9.25	-0.32	0.00724	0.246	Promoter (2-3kb)	446	11841017	11847684	6668	1	ENSG00000011021	ENST00000446542	-2007	1185	CLCN6	chloride voltage-gated channel 6
10	33559027	33559446	420	*	7.81	8.02	7.55	0.47	0.00724	0.246	Distal Intergenic	455	33578931	33600040	21110	2	ENSG00000226412	ENST00000457848	40594	NA	NA	NA
20	58407512	58407894	383	*	7.89	8.12	7.62	0.5	0.00724	0.246	Intron (ENST00000475243/ENSG00000124164, intron 1 of 5)	465	58389375	58446905	57531	1	ENSG00000124164	ENST00000265619	18137	9217	VAPB	VAMP associated protein B and C
12	123388403	123389144	742	*	10.36	10.47	10.24	0.23	0.00725	0.246	Promoter (<=1kb)	457	123388900	123396409	7510	1	ENSG00000183955	ENST00000478781	0	387893	KMT5A	lysine methyltransferase 5A
5	42772201	42773065	865	*	9.92	10.03	9.79	0.25	0.00728	0.247	Intron (ENST00000388827/ENSG00000198865, intron 4 of 6)	450	42756818	42802439	45622	1	ENSG00000198865	ENST00000361970	15383	100129792	CCDC152	coiled-coil domain containing 152
X	129653867	129655474	1608	*	10.58	10.47	10.68	-0.21	0.00728	0.247	Promoter (<=1kb)	468	129645259	129654956	9698	2	ENSG00000171388	ENST00000429967	0	8862	APLN	apelin
10	33661528	33662406	879	*	10.94	10.83	11.05	-0.22	0.00729	0.247	Distal Intergenic	455	33684755	33709868	25114	1	ENSG00000203565	ENST00000366376	-22349	NA	NA	NA
12	119386378	119387215	838	*	9.33	9.16	9.47	-0.31	0.0073	0.247	Intron (ENST00000536742/ENSG00000183273, intron 1 of 2)	457	119335211	119447912	112702	1	ENSG00000183273	ENST00000535685	51167	160777	CCDC60	coiled-coil domain containing 60
9	2015823	2018079	2257	*	12.32	12.23	12.4	-0.17	0.00731	0.247	Promoter (<=1kb)	454	2015971	2042802	26832	1	ENSG00000080503	ENST00000636903	0	6595	SMARCA2	SWI/SNF related, matrix associated, actin dependent regulator of chromatin, subfamily a, member 2
10	50067414	50068397	984	*	9.52	9.38	9.65	-0.27	0.00732	0.247	Promoter (<=1kb)	455	50067888	50133506	65619	1	ENSG00000099290	ENST00000611324	0	387680	WASHC2A	WASH complex subunit 2A
7	124764665	124766497	1833	*	11.93	11.84	12.01	-0.17	0.00732	0.247	Promoter (<=1kb)	452	124743885	124765792	21908	2	ENSG00000170775	ENST00000303921	0	2861	GPR37	G protein-coupled receptor 37
16	50548073	50548991	919	*	8.98	9.15	8.79	0.36	0.00733	0.247	Promoter (<=1kb)	461	50548396	50616108	67713	1	ENSG00000140807	ENST00000564336	0	85407	NKD1	NKD inhibitor of WNT signaling pathway 1
1	248825544	248826951	1408	*	11.62	11.53	11.7	-0.18	0.00733	0.247	Promoter (<=1kb)	446	248810446	248825915	15470	2	ENSG00000175137	ENST00000366472	0	80851	SH3BP5L	SH3 binding domain protein 5 like
15	77034940	77035573	634	*	8.47	8.26	8.64	-0.38	0.00734	0.248	Promoter (<=1kb)	460	77035694	77037332	1639	1	ENSG00000140368	ENST00000560064	-121	9051	PSTPIP1	proline-serine-threonine phosphatase interacting protein 1
7	33904209	33905901	1693	*	11.07	10.96	11.17	-0.21	0.00735	0.248	Promoter (<=1kb)	452	33904308	34046374	142067	1	ENSG00000164619	ENST00000436222	0	168667	BMPER	BMP binding endothelial regulator
8	6017861	6018952	1092	*	9.55	9.68	9.41	0.27	0.00737	0.248	Distal Intergenic	453	6036433	6036974	542	2	ENSG00000253189	ENST00000523090	18022	NA	NA	NA
10	99775928	99776350	423	*	9.15	9.3	8.99	0.31	0.00737	0.248	Distal Intergenic	455	99782640	99794348	11709	1	ENSG00000023839	ENST00000648689	-6290	1244	ABCC2	ATP binding cassette subfamily C member 2
17	43240821	43241478	658	*	7.82	8.05	7.55	0.5	0.00739	0.248	Promoter (<=1kb)	462	43241180	43241370	191	2	ENSG00000273709	ENST00000616535	0	NA	NA	NA
12	124541952	124542790	839	*	9.61	9.45	9.75	-0.3	0.00739	0.248	Promoter (<=1kb)	457	124542503	124542873	371	1	ENSG00000280354	ENST00000624885	0	NA	NA	NA
X	106042139	106042794	656	*	8.17	7.93	8.37	-0.44	0.00739	0.248	Distal Intergenic	468	106032435	106038727	6293	2	ENSG00000123561	ENST00000372563	-3412	6906	SERPINA7	serpin family A member 7
2	219245069	219246034	966	*	11.43	11.33	11.52	-0.19	0.00739	0.248	Promoter (<=1kb)	447	219245455	219250337	4883	1	ENSG00000115661	ENST00000409638	0	8576	STK16	serine/threonine kinase 16
7	103718512	103719516	1005	*	8.48	8.66	8.28	0.38	0.00742	0.248	Intron (ENST00000343529/ENSG00000189056, intron 8 of 63)	452	103627909	103630136	2228	2	ENSG00000189056	ENST00000473457	-88376	5649	RELN	reelin
19	48810687	48811501	815	*	10.62	10.51	10.73	-0.21	0.00742	0.248	Promoter (<=1kb)	464	48795062	48811012	15951	2	ENSG00000105552	ENST00000545387	0	587	BCAT2	branched chain amino acid transaminase 2
3	123719109	123720120	1012	*	9.28	9.11	9.42	-0.31	0.00742	0.248	Intron (ENST00000360772/ENSG00000065534, intron 14 of 33)	448	123715851	123716399	549	1	ENSG00000273123	ENST00000608701	3258	NA	NA	NA
7	114084455	114086777	2323	*	12.23	12.14	12.32	-0.18	0.00743	0.248	Promoter (<=1kb)	452	114086327	114690905	604579	1	ENSG00000128573	ENST00000412402	0	93986	FOXP2	forkhead box P2
5	132260698	132261450	753	*	10.23	10.12	10.34	-0.22	0.00743	0.248	Promoter (<=1kb)	450	132261449	132271336	9888	1	ENSG00000131435	ENST00000418373	0	8572	PDLIM4	PDZ and LIM domain 4
13	109348575	109349887	1313	*	8.81	8.98	8.61	0.36	0.00744	0.248	Distal Intergenic	458	109310135	109311773	1639	1	ENSG00000236053	ENST00000432575	38440	NA	NA	NA
5	80516742	80517332	591	*	8.79	8.96	8.6	0.36	0.00744	0.248	Intron (ENST00000511718/ENSG00000152380, intron 7 of 10)	450	80501805	80522524	20720	1	ENSG00000152380	ENST00000509292	14937	167555	FAM151B	family with sequence similarity 151 member B
17	15260434	15261765	1332	*	11.89	11.8	11.97	-0.17	0.00745	0.248	Promoter (<=1kb)	462	15229779	15260761	30983	2	ENSG00000109099	ENST00000675551	0	5376	PMP22	peripheral myelin protein 22
4	139599971	139600393	423	*	9.37	9.52	9.22	0.3	0.00745	0.248	3' UTR	449	139533231	139606699	73469	2	ENSG00000145391	ENST00000608795	6306	80854	SETD7	SET domain containing 7, histone lysine methyltransferase
17	50660025	50661191	1167	*	11.8	11.72	11.89	-0.17	0.00745	0.248	Promoter (<=1kb)	462	50662152	50667594	5443	1	ENSG00000108846	ENST00000513589	-961	8714	ABCC3	ATP binding cassette subfamily C member 3
1	161198289	161198979	691	*	9.73	9.6	9.86	-0.25	0.00746	0.248	Promoter (<=1kb)	446	161195979	161199053	3075	2	ENSG00000158859	ENST00000367995	74	9507	ADAMTS4	ADAM metallopeptidase with thrombospondin type 1 motif 4
20	17938845	17939876	1032	*	8.55	8.35	8.72	-0.36	0.00747	0.248	Downstream (1-2kb)	465	17941600	17943622	2023	2	ENSG00000089006	ENST00000484809	3746	27131	SNX5	sorting nexin 5
1	170664072	170665235	1164	*	9.97	9.84	10.09	-0.25	0.00747	0.248	Promoter (<=1kb)	446	170664131	170739421	75291	1	ENSG00000116132	ENST00000239461	0	5396	PRRX1	paired related homeobox 1
2	131681687	131683348	1662	*	10.91	10.8	11	-0.2	0.00747	0.248	Promoter (<=1kb)	447	131682475	131767404	84930	1	ENSG00000287151	ENST00000657415	0	29798	C2orf27A	chromosome 2 open reading frame 27A
6	27791191	27793267	2077	*	11.09	10.99	11.18	-0.2	0.00747	0.248	Distal Intergenic	451	27780619	27781111	493	2	ENSG00000218069	ENST00000404972	-10080	NA	NA	NA
6	137848432	137850247	1816	*	10.61	10.71	10.49	0.23	0.00748	0.248	Intron (ENST00000606998/ENSG00000237499, intron 3 of 3)	451	137854862	137858048	3187	2	ENSG00000237499	ENST00000606327	7801	100130476	WAKMAR2	wound and keratinocyte migration associated lncRNA 2
4	90727809	90728592	784	*	8.93	9.09	8.76	0.32	0.00749	0.248	Intron (ENST00000505073/ENSG00000184305, intron 8 of 9)	449	90682996	90683123	128	1	ENSG00000251401	ENST00000513074	44813	NA	NA	NA
3	184134032	184135964	1933	*	11.57	11.47	11.66	-0.19	0.00749	0.248	Promoter (<=1kb)	448	184135038	184145311	10274	1	ENSG00000145191	ENST00000491144	0	8893	EIF2B5	eukaryotic translation initiation factor 2B subunit epsilon
15	56805554	56806709	1156	*	9.67	9.79	9.53	0.26	0.0075	0.248	5' UTR	460	56795382	56795522	141	1	ENSG00000279683	ENST00000625170	10172	NA	NA	NA
8	22146818	22147328	511	*	8.96	8.79	9.12	-0.33	0.0075	0.248	3' UTR	453	22140206	22141951	1746	2	ENSG00000168476	ENST00000521744	-4867	80346	REEP4	receptor accessory protein 4
10	102229805	102232133	2329	*	11.91	11.82	11.99	-0.17	0.0075	0.248	Promoter (<=1kb)	455	102230186	102232083	1898	2	ENSG00000107859	ENST00000539804	0	5309	PITX3	paired like homeodomain 3
1	85313769	85314768	1000	*	10.57	10.68	10.45	0.23	0.0075	0.248	Intron (ENST00000654182/ENSG00000223653, intron 2 of 2)	446	85277672	85448124	170453	1	ENSG00000223653	ENST00000426125	36097	NA	NA	NA
17	64505343	64505799	457	*	9.2	9.02	9.36	-0.35	0.00751	0.248	Promoter (<=1kb)	462	64498257	64505401	7145	2	ENSG00000108654	ENST00000676581	0	1655	DDX5	DEAD-box helicase 5
19	35153731	35155870	2140	*	10.94	10.84	11.04	-0.2	0.00751	0.248	Promoter (<=1kb)	464	35154730	35159999	5270	1	ENSG00000089327	ENST00000392218	0	53827	FXYD5	FXYD domain containing ion transport regulator 5
2	72886884	72888333	1450	*	11.42	11.32	11.5	-0.18	0.00751	0.248	Promoter (<=1kb)	447	72887382	72891753	4372	1	ENSG00000116096	ENST00000498749	0	6697	SPR	sepiapterin reductase
21	38984768	38986352	1585	*	11.95	11.86	12.03	-0.17	0.00752	0.248	Downstream (2-3kb)	466	38974429	38977774	3346	2	ENSG00000232837	ENST00000433952	-6994	101928435	LINC01700	long intergenic non-protein coding RNA 1700
14	45679766	45680466	701	*	9.48	9.62	9.34	0.28	0.00752	0.248	Distal Intergenic	459	45706260	45714420	8161	2	ENSG00000258616	ENST00000554431	33954	105370479	LINC02303	long intergenic non-protein coding RNA 2303
13	65111966	65113068	1103	*	10.07	10.19	9.95	0.24	0.00752	0.248	Distal Intergenic	458	64958097	64959396	1300	2	ENSG00000214269	ENST00000441282	-152570	NA	NA	NA
20	6767401	6769014	1614	*	10.27	10.37	10.15	0.22	0.00752	0.248	Promoter (<=1kb)	465	6767686	6780246	12561	1	ENSG00000125845	ENST00000378827	0	650	BMP2	bone morphogenetic protein 2
9	127853572	127854900	1329	*	11.79	11.7	11.87	-0.17	0.00753	0.248	Promoter (<=1kb)	454	127815016	127854658	39643	2	ENSG00000106991	ENST00000373203	0	2022	ENG	endoglin
17	18624935	18626152	1218	*	9.4	9.24	9.54	-0.3	0.00753	0.248	Promoter (<=1kb)	462	18537800	18625608	87809	2	ENSG00000154874	ENST00000618081	0	284047	CCDC144B	coiled-coil domain containing 144B (pseudogene)
3	38327295	38328094	800	*	9.07	9.23	8.9	0.32	0.00753	0.248	Promoter (<=1kb)	448	38325237	38329070	3834	2	ENSG00000230123	ENST00000427139	976	NA	NA	NA
2	195363903	195365016	1114	*	9.04	9.19	8.88	0.31	0.00753	0.248	Distal Intergenic	447	195448532	195478925	30394	1	ENSG00000224099	ENST00000413290	-83516	NA	NA	NA
9	5832151	5833481	1331	*	11.88	11.78	11.97	-0.19	0.00753	0.248	Promoter (<=1kb)	454	5765076	5833070	67995	2	ENSG00000099219	ENST00000462592	0	79956	ERMP1	endoplasmic reticulum metallopeptidase 1
18	29165083	29165642	560	*	8.74	8.9	8.56	0.35	0.00753	0.248	Distal Intergenic	463	29256817	29257060	244	2	ENSG00000266479	ENST00000581934	91418	NA	NA	NA
4	183875894	183877008	1115	*	11.59	11.49	11.68	-0.19	0.00754	0.248	Intron (ENST00000513034/ENSG00000173320, intron 1 of 2)	449	183853431	184001407	147977	1	ENSG00000173320	ENST00000511250	22463	56977	STOX2	storkhead box 2
10	59362221	59363403	1183	*	10.21	10.1	10.32	-0.22	0.00755	0.248	Promoter (<=1kb)	455	59246130	59362594	116465	2	ENSG00000148541	ENST00000618427	0	220965	FAM13C	family with sequence similarity 13 member C
2	160256647	160258031	1385	*	11.41	11.32	11.5	-0.18	0.00755	0.248	Promoter (2-3kb)	447	160200773	160253849	53077	2	ENSG00000285155	ENST00000498478	-2798	NA	NA	NA
2	132415735	132417131	1397	*	12.07	11.98	12.16	-0.18	0.00755	0.248	Promoter (<=1kb)	447	132416805	132646582	229778	1	ENSG00000183840	ENST00000329321	0	2863	GPR39	G protein-coupled receptor 39
19	2150846	2152129	1284	*	11.76	11.85	11.66	0.18	0.00755	0.248	Promoter (<=1kb)	464	2100988	2151557	50570	2	ENSG00000065000	ENST00000345016	0	8943	AP3D1	adaptor related protein complex 3 subunit delta 1
7	130485884	130487259	1376	*	11.01	10.91	11.11	-0.2	0.00756	0.248	Promoter (<=1kb)	452	130486171	130506292	20122	1	ENSG00000106484	ENST00000341441	0	4232	MEST	mesoderm specific transcript
15	36737371	36738126	756	*	8.99	9.13	8.82	0.32	0.00756	0.248	Intron (ENST00000566621/ENSG00000186073, intron 10 of 10)	460	36755945	36809347	53403	1	ENSG00000186073	ENST00000563167	-17819	84529	C15orf41	chromosome 15 open reading frame 41
13	97259944	97260567	624	*	9.01	9.16	8.84	0.32	0.00757	0.249	Intron (ENST00000397601/ENSG00000139793, intron 1 of 6)	458	97278768	97295400	16633	2	ENSG00000286334	ENST00000665007	34833	NA	NA	NA
15	74127364	74128492	1129	*	10.75	10.64	10.85	-0.21	0.00758	0.249	Promoter (<=1kb)	460	74128126	74133022	4897	1	ENSG00000167178	ENST00000569886	0	57611	ISLR2	immunoglobulin superfamily containing leucine rich repeat 2
1	179930935	179931308	374	*	8.55	8.73	8.36	0.36	0.00759	0.249	Intron (ENST00000567486/ENSG00000261831, intron 1 of 2)	446	179926641	179941796	15156	2	ENSG00000261831	ENST00000567486	10488	NA	NA	NA
16	75111018	75111647	630	*	9.7	9.56	9.82	-0.26	0.0076	0.249	Promoter (<=1kb)	461	75108601	75110712	2112	2	ENSG00000247033	ENST00000499110	-306	NA	NA	NA
9	131591020	131591843	824	*	10.12	9.99	10.24	-0.24	0.00761	0.249	Intron (ENST00000372189/ENSG00000107263, intron 15 of 23)	454	131587736	131621838	34103	2	ENSG00000107263	ENST00000414781	29995	2889	RAPGEF1	Rap guanine nucleotide exchange factor 1
7	106717992	106718840	849	*	9.11	9.26	8.95	0.3	0.00762	0.249	Intron (ENST00000490856/ENSG00000243797, intron 1 of 4)	452	106372251	106732449	360199	2	ENSG00000243797	ENST00000490856	13609	NA	NA	NA
12	43370046	43370760	715	*	7.88	8.09	7.64	0.46	0.00762	0.249	Intron (ENST00000389420/ENSG00000173157, intron 36 of 38)	457	43422819	43439712	16894	2	ENSG00000173157	ENST00000549670	68952	80070	ADAMTS20	ADAM metallopeptidase with thrombospondin type 1 motif 20
3	24493978	24495933	1956	*	11.61	11.51	11.69	-0.18	0.00763	0.249	Promoter (<=1kb)	448	24117153	24494822	377670	2	ENSG00000151090	ENST00000396671	0	7068	THRB	thyroid hormone receptor beta
14	73612282	73613307	1026	*	10.34	10.21	10.47	-0.26	0.00763	0.249	Promoter (<=1kb)	459	73612517	73619888	7372	1	ENSG00000205669	ENST00000645972	0	641372	ACOT6	acyl-CoA thioesterase 6
16	67415836	67416692	857	*	9.48	9.33	9.61	-0.29	0.00763	0.249	Promoter (<=1kb)	461	67394152	67416477	22326	2	ENSG00000159714	ENST00000565726	0	29800	ZDHHC1	zinc finger DHHC-type containing 1
3	184241272	184242381	1110	*	9.65	9.51	9.78	-0.27	0.00763	0.249	Promoter (<=1kb)	448	184241405	184241489	85	1	ENSG00000221120	ENST00000408193	0	100187716	MIR1224	microRNA 1224
1	30801528	30802248	721	*	8.95	8.77	9.11	-0.33	0.00764	0.249	Distal Intergenic	446	30810378	30815553	5176	2	ENSG00000229607	ENST00000440358	13305	NA	NA	NA
9	28212871	28213448	578	*	9.34	9.48	9.18	0.29	0.00765	0.249	Intron (ENST00000379992/ENSG00000174482, intron 4 of 5)	454	28148211	28149236	1026	1	ENSG00000229060	ENST00000478520	64660	NA	NA	NA
3	119240091	119241227	1137	*	11	10.9	11.1	-0.2	0.00767	0.25	Promoter (<=1kb)	448	119211732	119240639	28908	2	ENSG00000121578	ENST00000483209	0	8702	B4GALT4	beta-1,4-galactosyltransferase 4
1	27590954	27591633	680	*	10.33	10.21	10.43	-0.22	0.00767	0.25	Intron (ENST00000247087/ENSG00000126705, intron 1 of 5)	446	27552496	27603414	50919	2	ENSG00000126705	ENST00000490295	11781	27245	AHDC1	AT-hook DNA binding motif containing 1
6	138455130	138456393	1264	*	9.23	9.37	9.07	0.3	0.00767	0.25	Intron (ENST00000427025/ENSG00000135540, intron 3 of 6)	451	138464099	138464383	285	1	ENSG00000274594	ENST00000619829	-7706	NA	NA	NA
3	186806039	186807331	1293	*	10.93	10.83	11.03	-0.2	0.00768	0.25	Promoter (<=1kb)	448	186789895	186806695	16801	2	ENSG00000163918	ENST00000392481	0	5984	RFC4	replication factor C subunit 4
4	149113564	149114442	879	*	8.14	8.34	7.9	0.44	0.00768	0.25	Distal Intergenic	449	149147793	149154175	6383	2	ENSG00000250252	ENST00000668418	39733	107986319	LINC02430	long intergenic non-protein coding RNA 2430
12	25997368	25998043	676	*	8.68	8.85	8.48	0.36	0.00769	0.25	Promoter (2-3kb)	457	25995004	26072871	77868	1	ENSG00000123094	ENST00000541490	2364	11228	RASSF8	Ras association domain family member 8
14	104094659	104095093	435	*	8.17	7.94	8.36	-0.42	0.00769	0.25	Promoter (1-2kb)	459	104093491	104105382	11892	1	ENSG00000166183	ENST00000551170	1168	374569	ASPG	asparaginase
12	15796599	15797284	686	*	7.73	7.96	7.45	0.51	0.0077	0.25	Intron (ENST00000646918/ENSG00000151491, intron 4 of 23)	457	15803164	15804158	995	1	ENSG00000256627	ENST00000544148	-5880	NA	NA	NA
12	131883062	131884026	965	*	9.16	8.99	9.32	-0.33	0.00771	0.25	Distal Intergenic	457	131894622	131923150	28529	1	ENSG00000177169	ENST00000321867	-10596	8408	ULK1	unc-51 like autophagy activating kinase 1
5	132369279	132370740	1462	*	11.76	11.65	11.86	-0.2	0.00771	0.25	Promoter (<=1kb)	450	132369710	132395612	25903	1	ENSG00000197375	ENST00000245407	0	6584	SLC22A5	solute carrier family 22 member 5
7	47405525	47407334	1810	*	12.08	11.99	12.15	-0.16	0.00771	0.25	Promoter (2-3kb)	452	47369497	47403425	33929	2	ENSG00000136205	ENST00000469470	-2100	64759	TNS3	tensin 3
6	56334718	56336283	1566	*	10.08	10.2	9.96	0.23	0.00771	0.25	Promoter (2-3kb)	451	56331788	56332117	330	2	ENSG00000227602	ENST00000415663	-2601	NA	NA	NA
19	1795609	1796507	899	*	9.1	8.93	9.25	-0.32	0.00771	0.25	3' UTR	464	1785558	1790817	5260	2	ENSG00000130270	ENST00000526847	-4792	148229	ATP8B3	ATPase phospholipid transporting 8B3
13	19910262	19910801	540	*	7.87	8.1	7.6	0.51	0.00772	0.25	Distal Intergenic	458	19863858	19865048	1191	1	ENSG00000275964	ENST00000620617	46404	NA	NA	NA
2	213187989	213188691	703	*	7.79	8.01	7.54	0.47	0.00772	0.25	Distal Intergenic	447	213155806	213167712	11907	2	ENSG00000236193	ENST00000426870	-20277	NA	NA	NA
5	41009107	41009737	631	*	9.76	9.89	9.61	0.28	0.00772	0.25	Exon (ENST00000503890/ENSG00000171495, exon 20 of 31)	450	40998017	41000068	2052	2	ENSG00000171495	ENST00000511934	-9039	133558	MROH2B	maestro heat like repeat family member 2B
17	77494686	77495313	628	*	8.94	8.77	9.1	-0.33	0.00773	0.25	Promoter (1-2kb)	462	77497075	77498824	1750	1	ENSG00000184640	ENST00000589246	-1762	10801	SEPTIN9	septin 9
1	234961840	234963022	1183	*	11.5	11.4	11.59	-0.19	0.00773	0.25	Promoter (<=1kb)	446	234959661	234962960	3300	2	ENSG00000238005	ENST00000656076	0	101927851	LOC101927851	uncharacterized LOC101927851
3	13496301	13496662	362	*	8.34	8.12	8.52	-0.4	0.00774	0.25	Promoter (<=1kb)	448	13496588	13504113	7526	1	ENSG00000163517	ENST00000498532	0	79885	HDAC11	histone deacetylase 11
5	136613233	136613894	662	*	8.72	8.89	8.53	0.35	0.00775	0.25	Distal Intergenic	450	136734830	136756158	21329	1	ENSG00000250284	ENST00000662288	-120936	NA	NA	NA
8	142738426	142739938	1513	*	12.07	11.98	12.15	-0.16	0.00776	0.25	Promoter (2-3kb)	453	142740949	142742406	1458	2	ENSG00000126233	ENST00000246515	2468	57152	SLURP1	secreted LY6/PLAUR domain containing 1
16	83926539	83927409	871	*	10.2	10.31	10.08	0.23	0.00777	0.25	3' UTR	461	83929796	83931110	1315	2	ENSG00000260932	ENST00000562835	3701	NA	NA	NA
2	67322395	67323055	661	*	9.58	9.43	9.7	-0.27	0.00777	0.25	Promoter (1-2kb)	447	67324627	67325304	678	1	ENSG00000236605	ENST00000450944	-1572	NA	NA	NA
17	45228387	45229534	1148	*	12.22	12.14	12.3	-0.16	0.00777	0.25	Promoter (1-2kb)	462	45230669	45234687	4019	1	ENSG00000184922	ENST00000585852	-1135	752	FMNL1	formin like 1
17	75456111	75457630	1520	*	11.37	11.28	11.46	-0.18	0.00777	0.25	Promoter (<=1kb)	462	75456635	75500452	43818	1	ENSG00000177728	ENST00000314256	0	9772	TMEM94	transmembrane protein 94
5	181159285	181160741	1457	*	10.19	10.07	10.29	-0.22	0.00779	0.25	3' UTR	450	181147638	181159285	11648	1	ENSG00000182613	ENST00000641791	11647	285659	OR2V2	olfactory receptor family 2 subfamily V member 2
2	218979787	218980529	743	*	9.81	9.67	9.94	-0.27	0.00779	0.25	Promoter (1-2kb)	447	218977825	218979609	1785	1	ENSG00000236445	ENST00000628185	1962	NA	NA	NA
1	33055146	33055959	814	*	10.05	9.93	10.16	-0.23	0.00781	0.251	Intron (ENST00000548559/ENSG00000004455, intron 2 of 4)	446	33008892	33037004	28113	2	ENSG00000004455	ENST00000354858	-18142	204	AK2	adenylate kinase 2
9	136283333	136284437	1105	*	10.91	10.81	11.01	-0.2	0.00782	0.251	Intron (ENST00000638797/ENSG00000260220, intron 9 of 25)	454	136263925	136267237	3313	1	ENSG00000283769	ENST00000640235	19408	NA	NA	NA
9	129751702	129753432	1731	*	12.11	12.02	12.19	-0.16	0.00783	0.251	Promoter (<=1kb)	454	129738331	129753019	14689	2	ENSG00000148344	ENST00000481476	0	9536	PTGES	prostaglandin E synthase
1	44786051	44786941	891	*	9.91	9.78	10.02	-0.24	0.00783	0.251	Promoter (1-2kb)	446	44783585	44788170	4586	2	ENSG00000142959	ENST00000372207	1229	266675	BEST4	bestrophin 4
2	153476537	153477625	1089	*	11.82	11.73	11.9	-0.17	0.00787	0.252	Promoter (1-2kb)	447	153477338	153478762	1425	2	ENSG00000177519	ENST00000325926	1137	56475	RPRM	reprimo, TP53 dependent G2 arrest mediator homolog
7	84042075	84042794	720	*	9.22	9.36	9.06	0.29	0.00787	0.252	Intron (ENST00000265362/ENSG00000075213, intron 6 of 16)	452	83955777	84194789	239013	2	ENSG00000075213	ENST00000265362	151995	10371	SEMA3A	semaphorin 3A
17	81871891	81872316	426	*	9.77	9.63	9.89	-0.25	0.00787	0.252	Promoter (<=1kb)	462	81869302	81871378	2077	2	ENSG00000141522	ENST00000584397	-513	396	ARHGDIA	Rho GDP dissociation inhibitor alpha
13	105611371	105611952	582	*	8.32	8.5	8.11	0.39	0.00789	0.252	Distal Intergenic	458	105690429	105702689	12261	1	ENSG00000280455	ENST00000626943	-78477	NA	NA	NA
5	30155920	30156903	984	*	9.23	9.37	9.07	0.3	0.00789	0.252	Distal Intergenic	450	30248350	30248893	544	1	ENSG00000250587	ENST00000505250	-91447	NA	NA	NA
1	58575839	58577797	1959	*	11.5	11.4	11.59	-0.18	0.00789	0.252	Promoter (<=1kb)	446	58575433	58577252	1820	2	ENSG00000184292	ENST00000371225	0	4070	TACSTD2	tumor associated calcium signal transducer 2
2	95402082	95403590	1509	*	10.98	10.88	11.07	-0.2	0.0079	0.252	Promoter (<=1kb)	447	95402708	95416616	13909	1	ENSG00000115042	ENST00000233379	0	51011	FAHD2A	fumarylacetoacetate hydrolase domain containing 2A
8	48628467	48629337	871	*	9.8	9.92	9.66	0.26	0.0079	0.252	Intron (ENST00000522575/ENSG00000253608, intron 2 of 3)	453	48597458	48621018	23561	2	ENSG00000253702	ENST00000523038	-7449	NA	NA	NA
8	27907950	27908915	966	*	10.8	10.7	10.9	-0.2	0.0079	0.252	Intron (ENST00000517735/ENSG00000253397, intron 1 of 2)	453	27904481	27910310	5830	1	ENSG00000253397	ENST00000517735	3469	NA	NA	NA
16	88731637	88732535	899	*	9.54	9.4	9.67	-0.27	0.0079	0.252	Promoter (<=1kb)	461	88732464	88732980	517	2	ENSG00000103335	ENST00000490756	445	9780	PIEZO1	piezo type mechanosensitive ion channel component 1
8	37514291	37514615	325	*	8.17	7.94	8.36	-0.42	0.00791	0.252	Promoter (2-3kb)	453	37516410	37517021	612	2	ENSG00000253414	ENST00000521989	2406	100507420	LINC01605	long intergenic non-protein coding RNA 1605
5	22501138	22501917	780	*	7.98	8.19	7.74	0.45	0.00793	0.253	Intron (ENST00000504376/ENSG00000154162, intron 2 of 13)	450	22580225	22580819	595	2	ENSG00000249206	ENST00000504682	78902	NA	NA	NA
2	29115851	29116713	863	*	9.89	9.77	10.01	-0.24	0.00793	0.253	Promoter (<=1kb)	447	29115415	29183808	68394	1	ENSG00000115295	ENST00000320081	436	79745	CLIP4	CAP-Gly domain containing linker protein family member 4
4	23021777	23022484	708	*	9.06	9.21	8.9	0.31	0.00796	0.253	Intron (ENST00000659942/ENSG00000248837, intron 2 of 6)	449	22999639	23193740	194102	1	ENSG00000248837	ENST00000663348	22138	105374524	LOC105374524	uncharacterized LOC105374524
X	54043743	54045145	1403	*	11.6	11.51	11.69	-0.18	0.00797	0.253	Promoter (<=1kb)	468	53936680	54044473	107794	2	ENSG00000172943	ENST00000338154	0	23133	PHF8	PHD finger protein 8
1	21337861	21339571	1711	*	12.44	12.36	12.51	-0.16	0.00797	0.253	Intron (ENST00000415912/ENSG00000117298, intron 1 of 18)	446	21272835	21345137	72303	2	ENSG00000117298	ENST00000463334	5566	1889	ECE1	endothelin converting enzyme 1
16	20030333	20031697	1365	*	10.89	10.79	10.99	-0.2	0.00799	0.253	3' UTR	461	20031659	20073767	42109	2	ENSG00000180269	ENST00000326571	42070	124274	GPR139	G protein-coupled receptor 139
12	89353296	89354475	1180	*	11	10.9	11.1	-0.2	0.00799	0.253	Promoter (<=1kb)	457	89353798	89418559	64762	1	ENSG00000286608	ENST00000657284	0	NA	NA	NA
1	246139698	246140269	572	*	8.88	9.04	8.71	0.32	0.00799	0.253	Intron (ENST00000630181/ENSG00000185420, intron 5 of 11)	446	246108637	246113804	5168	1	ENSG00000226876	ENST00000651181	31061	NA	NA	NA
17	40358523	40358804	282	*	8.88	8.71	9.03	-0.33	0.00799	0.253	Promoter (1-2kb)	462	40360655	40364693	4039	1	ENSG00000266208	ENST00000578774	-1851	NA	NA	NA
2	201642305	201643708	1404	*	11.08	10.97	11.17	-0.2	0.008	0.253	Promoter (<=1kb)	447	201620184	201642944	22761	2	ENSG00000155755	ENST00000409444	0	65062	TMEM237	transmembrane protein 237
7	99207826	99208767	942	*	10.57	10.68	10.44	0.24	0.008	0.253	Promoter (<=1kb)	452	99173574	99207506	33933	2	ENSG00000185467	ENST00000327442	-320	402569	KPNA7	karyopherin subunit alpha 7
8	10729746	10730925	1180	*	10.57	10.44	10.68	-0.24	0.008	0.253	Promoter (<=1kb)	453	10723768	10730511	6744	2	ENSG00000171056	ENST00000304501	0	83595	SOX7	SRY-box transcription factor 7
2	212537125	212539537	2413	*	11.46	11.37	11.55	-0.18	0.00802	0.254	Promoter (<=1kb)	447	211375717	212538802	1163086	2	ENSG00000178568	ENST00000342788	0	2066	ERBB4	erb-b2 receptor tyrosine kinase 4
12	30010077	30011046	970	*	9.36	9.5	9.21	0.29	0.00802	0.254	Distal Intergenic	457	30086342	30130590	44249	1	ENSG00000286566	ENST00000653361	-75296	NA	NA	NA
2	73176789	73178050	1262	*	9.93	9.8	10.05	-0.26	0.00804	0.254	Distal Intergenic	447	73088942	73156721	67780	2	ENSG00000135631	ENST00000475951	-20068	26056	RAB11FIP5	RAB11 family interacting protein 5
5	91266091	91266699	609	*	8.16	8.36	7.93	0.43	0.00805	0.254	Intron (ENST00000650150/ENSG00000248323, intron 3 of 3)	450	91270727	91270867	141	1	ENSG00000199643	ENST00000362773	-4028	NA	NA	NA
1	27395439	27395787	349	*	8.91	8.74	9.06	-0.32	0.00807	0.255	Promoter (2-3kb)	446	27392622	27395814	3193	1	ENSG00000181773	ENST00000374024	2817	2827	GPR3	G protein-coupled receptor 3
22	29480501	29481943	1443	*	9.48	9.33	9.62	-0.29	0.00809	0.255	Promoter (<=1kb)	467	29480220	29481113	894	2	ENSG00000282816	ENST00000634116	0	NA	NA	NA
2	133768165	133769014	850	*	9.76	9.62	9.89	-0.28	0.0081	0.255	Distal Intergenic	447	133596091	133596399	309	1	ENSG00000200708	ENST00000363838	172074	NA	NA	NA
17	77778741	77780686	1946	*	11.27	11.18	11.36	-0.19	0.00811	0.256	Distal Intergenic	462	77722872	77728559	5688	2	ENSG00000267790	ENST00000593118	-50182	100132174	LINC01987	long intergenic non-protein coding RNA 1987
8	130904512	130905454	943	*	9.4	9.53	9.25	0.28	0.00811	0.256	Intron (ENST00000286355/ENSG00000155897, intron 6 of 17)	453	130892070	130892785	716	2	ENSG00000253259	ENST00000520785	-11727	NA	NA	NA
3	89379877	89380604	728	*	8.94	9.1	8.76	0.34	0.00812	0.256	Intron (ENST00000336596/ENSG00000044524, intron 5 of 16)	448	89283016	89314604	31589	2	ENSG00000285780	ENST00000650616	-65273	NA	NA	NA
3	79017841	79019868	2028	*	11.6	11.51	11.69	-0.17	0.00812	0.256	Promoter (<=1kb)	448	78597240	79019459	422220	2	ENSG00000169855	ENST00000618833	0	6091	ROBO1	roundabout guidance receptor 1
7	121298626	121299535	910	*	10.38	10.5	10.26	0.24	0.00813	0.256	Distal Intergenic	452	121304657	121309842	5186	2	ENSG00000287554	ENST00000657332	10307	NA	NA	NA
1	209895558	209896499	942	*	9.78	9.9	9.65	0.25	0.00813	0.256	Distal Intergenic	446	209900923	209952756	51834	1	ENSG00000143469	ENST00000652023	-4424	255928	SYT14	synaptotagmin 14
6	72651139	72651531	393	*	7.75	7.98	7.49	0.48	0.00815	0.256	Intron (ENST00000342056/ENSG00000185760, intron 1 of 14)	451	72622172	73195454	573283	1	ENSG00000185760	ENST00000629977	28967	56479	KCNQ5	potassium voltage-gated channel subfamily Q member 5
16	57576333	57576940	608	*	8.52	8.33	8.7	-0.37	0.00816	0.256	Promoter (1-2kb)	461	57574816	57591681	16866	1	ENSG00000159618	ENST00000569839	1517	221188	ADGRG5	adhesion G protein-coupled receptor G5
5	28369321	28369840	520	*	9.16	9.32	8.99	0.33	0.00817	0.257	Distal Intergenic	450	28285964	28287807	1844	2	ENSG00000249785	ENST00000664667	-81514	105374698	LINC02103	long intergenic non-protein coding RNA 2103
5	25484306	25484854	549	*	8.3	8.5	8.06	0.44	0.00818	0.257	Distal Intergenic	450	25413439	25445925	32487	2	ENSG00000248605	ENST00000507887	-38381	NA	NA	NA
5	181203838	181205625	1788	*	12.26	12.17	12.34	-0.17	0.00818	0.257	Promoter (<=1kb)	450	181193924	181205196	11273	2	ENSG00000146054	ENST00000274773	0	81786	TRIM7	tripartite motif containing 7
4	117399740	117400764	1025	*	9.82	9.95	9.68	0.27	0.0082	0.257	Intron (ENST00000658771/ENSG00000228358, intron 3 of 3)	449	117406166	117689027	282862	1	ENSG00000236922	ENST00000626258	-5402	NA	NA	NA
17	82021099	82021734	636	*	10.73	10.62	10.82	-0.2	0.0082	0.257	Promoter (1-2kb)	462	82018716	82022821	4106	2	ENSG00000169689	ENST00000584514	1087	201254	CENPX	centromere protein X
1	25799744	25800939	1196	*	9.74	9.87	9.61	0.26	0.00821	0.257	Promoter (<=1kb)	446	25800176	25818219	18044	1	ENSG00000162430	ENST00000354177	0	57190	SELENON	selenoprotein N
3	138915000	138916477	1478	*	11.97	11.88	12.05	-0.16	0.00821	0.257	Distal Intergenic	448	138889255	138889957	703	2	ENSG00000242244	ENST00000463301	-25043	NA	NA	NA
12	104866239	104866723	485	*	8.21	8.39	7.99	0.4	0.00822	0.257	Exon (ENST00000258538/ENSG00000136052, exon 6 of 10)	457	104858838	104871765	12928	1	ENSG00000286410	ENST00000671114	7401	NA	NA	NA
6	40587346	40588219	874	*	8.48	8.26	8.66	-0.4	0.00824	0.258	Promoter (<=1kb)	451	40391591	40587364	195774	2	ENSG00000156564	ENST00000338305	0	57497	LRFN2	leucine rich repeat and fibronectin type III domain containing 2
9	136078657	136080365	1709	*	12.7	12.62	12.78	-0.16	0.00825	0.258	Intron (ENST00000277554/ENSG00000148411, intron 1 of 5)	454	136006537	136095289	88753	2	ENSG00000148411	ENST00000277554	14924	138151	NACC2	NACC family member 2
1	214332916	214333451	536	*	8.13	7.9	8.33	-0.43	0.00825	0.258	Promoter (1-2kb)	446	214330977	214337131	6155	1	ENSG00000143499	ENST00000416415	1939	56950	SMYD2	SET and MYND domain containing 2
12	118103266	118104629	1364	*	11.46	11.36	11.55	-0.19	0.00825	0.258	Promoter (<=1kb)	457	118063593	118104011	40419	2	ENSG00000176834	ENST00000359236	0	54621	VSIG10	V-set and immunoglobulin domain containing 10
16	22190018	22191600	1583	*	13.08	13.17	12.99	0.18	0.00825	0.258	3' UTR	461	22170309	22175524	5216	2	ENSG00000287739	ENST00000659141	-14494	NA	NA	NA
10	126215926	126217015	1090	*	10.36	10.24	10.46	-0.22	0.00826	0.258	Intron (ENST00000368679/ENSG00000148848, intron 3 of 22)	455	126272818	126273411	594	1	ENSG00000213170	ENST00000392696	-55803	NA	NA	NA
2	48111186	48112286	1101	*	11.29	11.2	11.38	-0.18	0.00827	0.258	Promoter (<=1kb)	447	48006039	48111391	105353	2	ENSG00000230773	ENST00000650693	0	NA	NA	NA
14	104137502	104139135	1634	*	11.48	11.39	11.56	-0.17	0.00827	0.258	Promoter (<=1kb)	459	104138723	104179790	41068	1	ENSG00000066735	ENST00000423312	0	26153	KIF26A	kinesin family member 26A
17	50153909	50154501	593	*	10.38	10.26	10.48	-0.22	0.00827	0.258	Distal Intergenic	462	50133737	50150677	16941	2	ENSG00000108819	ENST00000612501	-3232	84687	PPP1R9B	protein phosphatase 1 regulatory subunit 9B
15	33217560	33218593	1034	*	9.82	9.94	9.69	0.25	0.00829	0.258	Distal Intergenic	460	32765544	33194714	429171	2	ENSG00000248905	ENST00000616417	-22846	342184	FMN1	formin 1
1	244599678	244600516	839	*	9.66	9.78	9.53	0.26	0.00829	0.258	Promoter (<=1kb)	446	244598391	244598687	297	2	ENSG00000227735	ENST00000415043	-991	NA	NA	NA
15	57060689	57061518	830	*	9.2	9.34	9.05	0.29	0.0083	0.258	Promoter (2-3kb)	460	57063748	57092023	28276	1	ENSG00000140262	ENST00000569880	-2230	6938	TCF12	transcription factor 12
13	44710541	44711160	620	*	9.17	9.31	9.01	0.3	0.0083	0.258	Intron (ENST00000611081/ENSG00000276527, intron 1 of 1)	458	44684487	44715393	30907	2	ENSG00000276527	ENST00000611081	4233	NA	NA	NA
1	235999237	235999966	730	*	8.81	8.97	8.63	0.34	0.0083	0.258	Intron (ENST00000264187/ENSG00000116962, intron 12 of 19)	446	235957879	235971825	13947	2	ENSG00000229291	ENST00000443207	-27412	NA	NA	NA
10	109922561	109923831	1271	*	10.7	10.8	10.59	0.21	0.00831	0.258	Promoter (<=1kb)	455	109864766	109923511	58746	2	ENSG00000108039	ENST00000369683	0	7511	XPNPEP1	X-prolyl aminopeptidase 1
6	16689045	16689551	507	*	7.85	8.06	7.61	0.45	0.00832	0.258	Intron (ENST00000244769/ENSG00000124788, intron 3 of 8)	451	16432564	16750092	317529	2	ENSG00000124788	ENST00000483591	60541	6310	ATXN1	ataxin 1
2	128318709	128319313	605	*	9.76	9.89	9.61	0.28	0.00834	0.259	Promoter (<=1kb)	447	128265480	128318868	53389	2	ENSG00000136720	ENST00000259241	0	9394	HS6ST1	heparan sulfate 6-O-sulfotransferase 1
19	45681364	45682113	750	*	10.85	10.75	10.94	-0.19	0.00835	0.259	3' UTR	464	45677637	45678126	490	1	ENSG00000010310	ENST00000593127	3727	2696	GIPR	gastric inhibitory polypeptide receptor
3	110384452	110385052	601	*	8.14	8.34	7.92	0.41	0.00835	0.259	Distal Intergenic	448	110527482	110529582	2101	2	ENSG00000240895	ENST00000474711	144530	NA	NA	NA
3	39189615	39190201	587	*	8.42	8.22	8.6	-0.39	0.00836	0.259	Promoter (2-3kb)	448	39183215	39192595	9381	2	ENSG00000168334	ENST00000340369	2394	165904	XIRP1	xin actin binding repeat containing 1
2	144083992	144084797	806	*	8.23	8.41	8.01	0.4	0.00837	0.259	Intron (ENST00000392869/ENSG00000121964, intron 5 of 10)	447	144007334	144145905	138572	2	ENSG00000121964	ENST00000476958	61108	79712	GTDC1	glycosyltransferase like domain containing 1
10	5613821	5614695	875	*	9.73	9.59	9.85	-0.26	0.00838	0.259	Promoter (1-2kb)	455	5594990	5612091	17102	2	ENSG00000242147	ENST00000674838	-1730	105376382	LINC02657	long intergenic non-protein coding RNA 2657
2	42132505	42133584	1080	*	11.91	11.83	11.99	-0.17	0.00838	0.259	Distal Intergenic	447	42169353	42330744	161392	1	ENSG00000143924	ENST00000402711	-35769	27436	EML4	EMAP like 4
X	40908730	40909914	1185	*	9.03	9.18	8.86	0.32	0.00838	0.259	Promoter (<=1kb)	468	40907987	40908391	405	1	ENSG00000189145	ENST00000342691	743	NA	NA	NA
18	42192487	42193389	903	*	9.63	9.75	9.49	0.26	0.0084	0.259	Intron (ENST00000601948/ENSG00000267586, intron 3 of 4)	463	42186703	42691422	504720	1	ENSG00000267586	ENST00000589068	5784	284260	LINC00907	long intergenic non-protein coding RNA 907
2	70553251	70554509	1259	*	10.95	10.84	11.06	-0.22	0.0084	0.259	Promoter (<=1kb)	447	70447284	70553826	106543	2	ENSG00000163235	ENST00000295400	0	7039	TGFA	transforming growth factor alpha
9	21684854	21685372	519	*	10.49	10.59	10.39	0.21	0.00841	0.259	Distal Intergenic	454	21695176	21696943	1768	1	ENSG00000229835	ENST00000427983	-9804	NA	NA	NA
10	88650987	88651734	748	*	9.07	9.21	8.91	0.3	0.00841	0.259	Distal Intergenic	455	88664441	88678811	14371	1	ENSG00000182333	ENST00000394375	-12707	8513	LIPF	lipase F, gastric type
5	27494765	27495415	651	*	9.7	9.83	9.57	0.26	0.00842	0.259	Promoter (1-2kb)	450	27493359	27496404	3046	1	ENSG00000250337	ENST00000671061	1406	643401	PURPL	p53 upregulated regulator of p53 levels
18	23283867	23284434	568	*	7.75	7.97	7.48	0.49	0.00843	0.26	Intron (ENST00000581444/ENSG00000134490, intron 14 of 15)	463	23257164	23260354	3191	2	ENSG00000266495	ENST00000585184	-23513	NA	NA	NA
8	145002285	145003566	1282	*	11.66	11.57	11.75	-0.19	0.00844	0.26	Promoter (<=1kb)	453	144973589	145002894	29306	2	ENSG00000196922	ENST00000426361	0	NA	NA	NA
3	48846940	48848286	1347	*	12.15	12.06	12.23	-0.18	0.00844	0.26	Promoter (<=1kb)	448	48746586	48847874	101289	2	ENSG00000114302	ENST00000265563	0	5576	PRKAR2A	protein kinase cAMP-dependent type II regulatory subunit alpha
10	102478815	102479632	818	*	9.36	9.2	9.5	-0.3	0.00845	0.26	3' UTR	455	102483039	102483559	521	1	ENSG00000273262	ENST00000608017	-3407	NA	NA	NA
2	40721556	40722116	561	*	8.16	8.37	7.9	0.47	0.00846	0.26	Distal Intergenic	447	40746481	40757846	11366	1	ENSG00000233128	ENST00000655021	-24365	NA	NA	NA
X	17786753	17787553	801	*	7.98	7.75	8.18	-0.44	0.00846	0.26	Distal Intergenic	468	17769005	17769398	394	2	ENSG00000227873	ENST00000445666	-17355	NA	NA	NA
1	109493683	109494636	954	*	11.1	11	11.19	-0.19	0.00847	0.26	Promoter (<=1kb)	446	109494052	109496272	2221	1	ENSG00000174151	ENST00000393709	0	284613	CYB561D1	cytochrome b561 family member D1
6	89145518	89146975	1458	*	11.32	11.22	11.41	-0.19	0.00847	0.26	Promoter (<=1kb)	451	89146055	89165565	19511	1	ENSG00000146281	ENST00000275072	0	135293	PM20D2	peptidase M20 domain containing 2
5	38466134	38467522	1389	*	11.58	11.49	11.66	-0.17	0.00849	0.26	Promoter (<=1kb)	450	38460925	38468307	7383	2	ENSG00000251257	ENST00000510469	785	NA	NA	NA
3	120348479	120350027	1549	*	12.12	12.02	12.21	-0.18	0.00849	0.26	Promoter (<=1kb)	448	120324509	120349354	24846	2	ENSG00000163428	ENST00000295628	0	116064	LRRC58	leucine rich repeat containing 58
5	1568187	1569074	888	*	11.15	11.24	11.06	0.18	0.00851	0.261	Exon (ENST00000652578/ENSG00000185986, exon 9 of 9)	450	1544107	1551710	7604	2	ENSG00000251532	ENST00000503113	-16477	NA	NA	NA
17	3913669	3914385	717	*	9.65	9.51	9.77	-0.26	0.00852	0.261	Promoter (2-3kb)	462	3896592	3916452	19861	2	ENSG00000108405	ENST00000572418	2067	5023	P2RX1	purinergic receptor P2X 1
2	153478840	153480074	1235	*	11.44	11.34	11.53	-0.18	0.00852	0.261	Promoter (<=1kb)	447	153477338	153478762	1425	2	ENSG00000177519	ENST00000325926	-78	56475	RPRM	reprimo, TP53 dependent G2 arrest mediator homolog
17	76871946	76873270	1325	*	12.12	12.03	12.19	-0.16	0.00854	0.261	Promoter (<=1kb)	462	76872647	76950382	77736	1	ENSG00000167889	ENST00000428789	0	146664	MGAT5B	alpha-1,6-mannosylglycoprotein 6-beta-N-acetylglucosaminyltransferase B
5	6436752	6437524	773	*	9.96	10.07	9.84	0.23	0.00854	0.261	Distal Intergenic	450	6448859	6496723	47865	1	ENSG00000215218	ENST00000399816	-11335	134111	UBE2QL1	ubiquitin conjugating enzyme E2 Q family like 1
15	91055709	91056556	848	*	9.55	9.41	9.68	-0.28	0.00854	0.261	Distal Intergenic	460	91031712	91032435	724	2	ENSG00000258665	ENST00000557387	-23274	NA	NA	NA
15	70195599	70197290	1692	*	12.89	12.81	12.97	-0.16	0.00854	0.261	Promoter (1-2kb)	460	70195638	70198509	2872	2	ENSG00000259252	ENST00000561310	1219	NA	NA	NA
14	22556805	22557714	910	*	9.38	9.23	9.51	-0.28	0.00856	0.261	Promoter (<=1kb)	459	22556311	22557062	752	2	ENSG00000259054	ENST00000557232	0	105370400	LINC02332	long intergenic non-protein coding RNA 2332
17	28854340	28855533	1194	*	11.2	11.11	11.3	-0.19	0.00857	0.261	Promoter (<=1kb)	462	28855010	28858775	3766	1	ENSG00000132591	ENST00000412138	0	26284	ERAL1	Era like 12S mitochondrial rRNA chaperone 1
2	28377014	28377644	631	*	7.82	8.04	7.56	0.48	0.00857	0.261	Distal Intergenic	447	28392448	28408802	16355	1	ENSG00000075426	ENST00000460736	-14804	2355	FOSL2	FOS like 2, AP-1 transcription factor subunit
7	151303283	151304023	741	*	9.23	9.08	9.37	-0.29	0.00857	0.261	Distal Intergenic	452	151242721	151277896	35176	2	ENSG00000082014	ENST00000491651	-25387	6604	SMARCD3	SWI/SNF related, matrix associated, actin dependent regulator of chromatin, subfamily d, member 3
8	89591739	89593097	1359	*	8.94	9.09	8.77	0.32	0.00857	0.261	Intron (ENST00000661105/ENSG00000251136, intron 2 of 2)	453	89586160	89599213	13054	2	ENSG00000251136	ENST00000658265	6116	101929709	LOC101929709	uncharacterized LOC101929709
5	35857688	35858270	583	*	11.06	11.15	10.97	0.19	0.00858	0.261	Promoter (<=1kb)	450	35856892	35867610	10719	1	ENSG00000168685	ENST00000511982	796	3575	IL7R	interleukin 7 receptor
15	56871149	56871831	683	*	8.3	8.48	8.09	0.39	0.00858	0.261	Intron (ENST00000559000/ENSG00000285253, intron 3 of 23)	460	56887107	56888219	1113	1	ENSG00000276524	ENST00000621974	-15276	NA	NA	NA
2	31233747	31234580	834	*	9.58	9.43	9.72	-0.29	0.00858	0.261	Promoter (<=1kb)	447	31234152	31269451	35300	1	ENSG00000013016	ENST00000322054	0	30845	EHD3	EH domain containing 3
10	22823029	22823619	591	*	9.11	9.26	8.95	0.31	0.00859	0.261	Distal Intergenic	455	22787393	22787499	107	1	ENSG00000206842	ENST00000384115	35636	NA	NA	NA
14	74257056	74257989	934	*	9.02	8.84	9.19	-0.35	0.00859	0.261	Intron (ENST00000261980/ENSG00000119614, intron 3 of 4)	459	74239449	74262738	23290	1	ENSG00000119614	ENST00000261980	17607	338917	VSX2	visual system homeobox 2
3	138173992	138175070	1079	*	10.56	10.45	10.66	-0.2	0.00859	0.261	Promoter (<=1kb)	448	138160988	138174921	13934	2	ENSG00000138231	ENST00000260803	0	51163	DBR1	debranching RNA lariats 1
6	104859226	104860237	1012	*	11.06	10.95	11.16	-0.21	0.0086	0.261	Promoter (<=1kb)	451	104728094	104859919	131826	2	ENSG00000085382	ENST00000262903	0	57531	HACE1	HECT domain and ankyrin repeat containing E3 ubiquitin protein ligase 1
16	27578425	27579485	1061	*	9.76	9.88	9.63	0.25	0.00861	0.261	Intron (ENST00000261588/ENSG00000047578, intron 2 of 27)	461	27573922	27677931	104010	1	ENSG00000047578	ENST00000565672	4503	23247	KIAA0556	KIAA0556
6	2634082	2634833	752	*	11	10.9	11.09	-0.19	0.00863	0.262	Promoter (<=1kb)	451	2621913	2634619	12707	2	ENSG00000164385	ENST00000624527	0	154386	LINC01600	long intergenic non-protein coding RNA 1600
15	85864741	85865477	737	*	8.23	8	8.42	-0.42	0.00863	0.262	Distal Intergenic	460	85825635	85825730	96	1	ENSG00000264406	ENST00000584739	39106	100847084	MIR548AP	microRNA 548ap
19	4086275	4087082	808	*	9.31	9.15	9.45	-0.31	0.00863	0.262	Distal Intergenic	464	4095388	4100072	4685	2	ENSG00000126934	ENST00000595715	12990	5605	MAP2K2	mitogen-activated protein kinase kinase 2
9	115126936	115127563	628	*	7.65	7.87	7.38	0.49	0.00864	0.262	Exon (ENST00000423637/ENSG00000236461, exon 3 of 6)	454	115019578	115118257	98680	2	ENSG00000041982	ENST00000535648	-8679	3371	TNC	tenascin C
10	30682192	30682833	642	*	9.85	9.97	9.73	0.24	0.00864	0.262	Intron (ENST00000422642/ENSG00000234814, intron 2 of 18)	455	30693662	30698463	4802	1	ENSG00000234814	ENST00000435645	-10829	NA	NA	NA
5	173767362	173768235	874	*	10.89	10.8	10.99	-0.19	0.00866	0.262	Intron (ENST00000671054/ENSG00000287003, intron 1 of 1)	450	173757562	173773164	15603	1	ENSG00000287003	ENST00000671054	9800	NA	NA	NA
16	83532977	83533664	688	*	8.28	8.47	8.06	0.4	0.00866	0.262	Intron (ENST00000268613/ENSG00000140945, intron 8 of 14)	461	83508346	83508408	63	1	ENSG00000263785	ENST00000580839	24631	100422853	MIR3182	microRNA 3182
7	85135839	85136503	665	*	9.45	9.59	9.3	0.28	0.00866	0.262	Intron (ENST00000444867/ENSG00000153993, intron 2 of 9)	452	84995553	85121935	126383	2	ENSG00000153993	ENST00000284136	-13904	223117	SEMA3D	semaphorin 3D
12	120713948	120714217	270	*	8.02	7.79	8.22	-0.43	0.00867	0.262	Intron (ENST00000344651/ENSG00000175970, intron 2 of 4)	457	120710517	120716640	6124	1	ENSG00000175970	ENST00000539658	3431	84747	UNC119B	unc-119 lipid binding chaperone B
16	87635306	87636734	1429	*	11.14	11.05	11.23	-0.18	0.00867	0.262	Intron (ENST00000537256/ENSG00000154118, intron 1 of 5)	461	87653562	87698142	44581	1	ENSG00000154118	ENST00000563609	-16828	57338	JPH3	junctophilin 3
4	140426756	140428098	1343	*	11.15	11.06	11.24	-0.18	0.00867	0.262	Promoter (<=1kb)	449	140388453	140427648	39196	2	ENSG00000153132	ENST00000325617	0	1047	CLGN	calmegin
17	40283601	40284101	501	*	9.9	10.02	9.78	0.24	0.0087	0.262	3' UTR	462	40287879	40304657	16779	1	ENSG00000094804	ENST00000209728	-3778	990	CDC6	cell division cycle 6
14	104967048	104968558	1511	*	12.21	12.13	12.29	-0.16	0.00871	0.263	Promoter (1-2kb)	459	104937244	104970481	33238	2	ENSG00000185567	ENST00000555122	1923	113146	AHNAK2	AHNAK nucleoprotein 2
1	26279541	26280738	1198	*	11.5	11.4	11.59	-0.19	0.00874	0.263	Promoter (<=1kb)	446	26280086	26281522	1437	1	ENSG00000142669	ENST00000270792	0	83442	SH3BGRL3	SH3 domain binding glutamate rich protein like 3
19	4636154	4636739	586	*	8.84	8.66	8.99	-0.33	0.00875	0.264	Promoter (2-3kb)	464	4639516	4655568	16053	1	ENSG00000185361	ENST00000327473	-2777	126282	TNFAIP8L1	TNF alpha induced protein 8 like 1
5	32462624	32463077	454	*	7.78	7.99	7.53	0.46	0.00876	0.264	Distal Intergenic	450	32354350	32444740	90391	2	ENSG00000056097	ENST00000265069	-17884	51663	ZFR	zinc finger RNA binding protein
16	83898569	83899970	1402	*	10.95	11.06	10.83	0.23	0.00878	0.264	Promoter (<=1kb)	461	83899115	83927031	27917	1	ENSG00000103150	ENST00000262430	0	23417	MLYCD	malonyl-CoA decarboxylase
10	110664800	110665470	671	*	9.71	9.83	9.58	0.25	0.00878	0.264	Intron (ENST00000369519/ENSG00000203867, intron 1 of 13)	455	110644336	110839468	195133	1	ENSG00000203867	ENST00000369519	20464	282996	RBM20	RNA binding motif protein 20
3	115401376	115402807	1432	*	9.29	9.43	9.14	0.28	0.00879	0.264	Intron (ENST00000662602/ENSG00000242880, intron 7 of 7)	448	115418862	115438550	19689	1	ENSG00000288074	ENST00000657664	-16055	NA	NA	NA
4	149223591	149224327	737	*	8.94	9.09	8.76	0.33	0.0088	0.264	Intron (ENST00000503100/ENSG00000248210, intron 9 of 12)	449	149154295	149278123	123829	1	ENSG00000248210	ENST00000503100	69296	101927849	LINC02355	long intergenic non-protein coding RNA 2355
14	45177057	45177670	614	*	8.14	8.35	7.9	0.44	0.0088	0.264	Promoter (1-2kb)	459	45175958	45200071	24114	1	ENSG00000187790	ENST00000554809	1099	57697	FANCM	FA complementation group M
14	91417201	91419117	1917	*	11.25	11.34	11.16	0.19	0.0088	0.264	Promoter (<=1kb)	459	91271323	91417820	146498	2	ENSG00000015133	ENST00000389857	0	440193	CCDC88C	coiled-coil domain containing 88C
22	50029833	50030811	979	*	10.93	10.83	11.02	-0.19	0.0088	0.264	Exon (ENST00000266182/ENSG00000138892, exon 12 of 14)	467	49994513	50012659	18147	2	ENSG00000188263	ENST00000389983	-17174	400935	IL17REL	interleukin 17 receptor E like
18	45324191	45325409	1219	*	11.5	11.4	11.59	-0.18	0.00881	0.264	Intron (ENST00000586448/ENSG00000132874, intron 1 of 20)	463	45423764	45435297	11534	2	ENSG00000267097	ENST00000586330	109888	NA	NA	NA
[truncated: 76,127 more rows]

## Sheet: 24h Hpx 
seqnames	start	end	width	strand	Conc	Conc_24hpx	Conc_0hpx	Fold	p.value	FDR	annotation	geneChr	geneStart	geneEnd	geneLength	geneStrand	geneId	transcriptId	distanceToTSS	ENTREZID	SYMBOL	GENENAME
9	35673354	35674525	1172	*	11.09	11.69	10.02	1.68	4.12e-127	2.97e-122	Promoter (<=1kb)	454	35673918	35681155	7238	1	ENSG00000107159	ENST00000617161	0	768	CA9	carbonic anhydrase 9
14	34035242	34036296	1055	*	10.36	10.95	9.34	1.61	7.83e-72	2.82e-67	Intron (ENST00000487915/ENSG00000129521, intron 4 of 5)	459	34040097	34059300	19204	1	ENSG00000258897	ENST00000555922	-3801	NA	NA	NA
12	54431985	54433080	1096	*	11.34	11.71	10.82	0.89	2.46e-42	5.91e-38	Intron (ENST00000550474/ENSG00000258137, intron 2 of 3)	457	54428303	54429403	1101	1	ENSG00000257477	ENST00000548617	3682	NA	NA	NA
6	43667220	43668849	1630	*	10.98	11.39	10.41	0.99	4.16e-37	7.5e-33	Intron (ENST00000372163/ENSG00000172426, intron 4 of 4)	451	43671202	43687791	16590	2	ENSG00000096080	ENST00000372133	18942	55168	MRPS18A	mitochondrial ribosomal protein S18A
6	44074336	44075852	1517	*	11.06	11.41	10.59	0.82	1.52e-33	2.18e-29	Promoter (<=1kb)	451	43995723	44074652	78930	2	ENSG00000237686	ENST00000422059	0	101929705	LOC101929705	uncharacterized LOC101929705
8	133216278	133217436	1159	*	11.32	11.67	10.86	0.81	3.3e-33	3.97e-29	Intron (ENST00000377862/ENSG00000104415, intron 1 of 2)	453	133237176	133241527	4352	2	ENSG00000104419	ENST00000521438	24091	10397	NDRG1	N-myc downstream regulated 1
3	129586664	129588186	1523	*	10.63	11.05	10.02	1.03	1.75e-31	1.8e-27	Promoter (<=1kb)	448	129583631	129586685	3055	2	ENSG00000004399	ENST00000505665	0	23129	PLXND1	plexin D1
1	210373208	210374917	1710	*	11.25	10.82	11.58	-0.75	6.04e-31	5.44e-27	Promoter (<=1kb)	446	210374154	210374267	114	2	ENSG00000200972	ENST00000364102	0	NA	NA	NA
15	90126538	90127437	900	*	9.33	9.84	8.55	1.28	7.65e-31	6.12e-27	Intron (ENST00000561101/ENSG00000259685, intron 3 of 4)	460	90102649	90138016	35368	1	ENSG00000259685	ENST00000561101	23889	NA	NA	NA
19	15072839	15073518	680	*	8.05	8.73	6.74	1.99	1.56e-27	1.12e-23	Distal Intergenic	464	15082211	15092970	10760	1	ENSG00000094661	ENST00000641398	-8693	126370	OR1I1	olfactory receptor family 1 subfamily I member 1
12	131901930	131902778	849	*	10.62	10.99	10.11	0.88	4.08e-27	2.68e-23	Intron (ENST00000321867/ENSG00000177169, intron 3 of 27)	457	131906490	131909996	3507	1	ENSG00000177169	ENST00000537421	-3712	8408	ULK1	unc-51 like autophagy activating kinase 1
9	2427368	2427952	585	*	7.28	8.06	5.42	2.64	1.16e-26	6.94e-23	Promoter (1-2kb)	454	2421926	2425957	4032	2	ENSG00000236404	ENST00000653709	-1411	401491	VLDLR-AS1	VLDLR antisense RNA 1
19	2087015	2087555	541	*	9.01	9.55	8.15	1.4	4e-26	2.22e-22	Promoter (1-2kb)	464	2078446	2085652	7207	2	ENSG00000172081	ENST00000586676	-1363	126308	MOB3A	MOB kinase activator 3A
12	120474632	120475000	369	*	8.12	8.79	6.82	1.96	2.43e-25	1.25e-21	Intron (ENST00000392509/ENSG00000088986, intron 1 of 2)	457	120469883	120498237	28355	1	ENSG00000088986	ENST00000548342	4749	8655	DYNLL1	dynein light chain LC8-type 1
15	65304594	65305612	1019	*	11.7	11.35	11.98	-0.63	2.95e-25	1.42e-21	Promoter (<=1kb)	460	65304677	65304792	116	1	ENSG00000200156	ENST00000363286	0	26832	RNU5B-1	RNA, U5B small nuclear 1
7	140315974	140317028	1055	*	9.3	9.76	8.62	1.14	1.95e-24	8.78e-21	Intron (ENST00000477571/ENSG00000157800, intron 13 of 15)	452	140335472	140337825	2354	2	ENSG00000157800	ENST00000485139	20797	84255	SLC37A3	solute carrier family 37 member 3
9	19161559	19162273	715	*	9	9.5	8.25	1.24	7.57e-24	3.21e-20	Distal Intergenic	454	19129737	19149290	19554	2	ENSG00000147872	ENST00000494753	-12269	123	PLIN2	perilipin 2
5	1568187	1569074	888	*	11.37	11.65	11.02	0.64	2.27e-22	9.1e-19	Exon (ENST00000652578/ENSG00000185986, exon 9 of 9)	450	1544107	1551710	7604	2	ENSG00000251532	ENST00000503113	-16477	NA	NA	NA
10	103777122	103777867	746	*	9.91	10.33	9.31	1.02	4.62e-22	1.75e-18	Intron (ENST00000369774/ENSG00000107957, intron 2 of 14)	455	103601746	103801297	199552	2	ENSG00000107957	ENST00000420222	23430	9644	SH3PXD2A	SH3 and PX domains 2A
1	180166891	180168566	1676	*	11.46	11.76	11.09	0.66	5.56e-22	2e-18	Intron (ENST00000367602/ENSG00000116260, intron 2 of 11)	446	180154897	180198034	43138	1	ENSG00000116260	ENST00000367600	11994	5768	QSOX1	quiescin sulfhydryl oxidase 1
9	136577747	136579683	1937	*	11.54	11.8	11.23	0.57	5.13e-21	1.76e-17	Distal Intergenic	454	136549130	136549893	764	1	ENSG00000237886	ENST00000450304	28617	NA	NA	NA
1	44720905	44722379	1475	*	11.53	11.18	11.81	-0.63	8.48e-21	2.78e-17	Promoter (<=1kb)	446	44721786	44721902	117	2	ENSG00000199377	ENST00000362507	0	26828	RNU5F-1	RNA, U5F small nuclear 1
2	84945879	84946997	1119	*	10.3	10.63	9.85	0.78	1.92e-20	6.02e-17	Intron (ENST00000671359/ENSG00000287625, intron 2 of 3)	447	84926143	84963249	37107	1	ENSG00000287625	ENST00000661374	19736	NA	NA	NA
8	133386495	133386905	411	*	9.19	9.64	8.55	1.08	3e-20	9.02e-17	Distal Intergenic	453	133392211	133392690	480	2	ENSG00000253638	ENST00000517470	5785	NA	NA	NA
8	133383133	133383810	678	*	10.48	10.83	10.03	0.8	9.19e-20	2.65e-16	Distal Intergenic	453	133392211	133392690	480	2	ENSG00000253638	ENST00000517470	8880	NA	NA	NA
20	35617392	35617948	557	*	10.32	10.67	9.87	0.8	3.26e-19	9.04e-16	Promoter (<=1kb)	465	35617689	35620934	3246	1	ENSG00000061656	ENST00000498203	0	6676	SPAG4	sperm associated antigen 4
15	99029097	99029784	688	*	8.8	9.29	8.05	1.25	7.76e-19	2.07e-15	Promoter (<=1kb)	460	99028538	99031053	2516	1	ENSG00000278090	ENST00000611654	559	NA	NA	NA
18	59484394	59485482	1089	*	10.05	9.59	10.4	-0.81	1.01e-18	2.59e-15	Intron (ENST00000439986/ENSG00000183287, intron 2 of 10)	463	59430940	59480240	49301	2	ENSG00000183287	ENST00000398179	-4154	147372	CCBE1	collagen and calcium binding EGF domains 1
3	149224641	149225747	1107	*	10.2	10.53	9.77	0.76	1.55e-18	3.84e-15	Promoter (<=1kb)	448	149224138	149226334	2197	1	ENSG00000286714	ENST00000663884	503	NA	NA	NA
7	140230408	140231767	1360	*	8.92	9.39	8.22	1.17	5.1e-18	1.22e-14	Distal Intergenic	452	140241870	140242032	163	1	ENSG00000199283	ENST00000362413	-10103	NA	NA	NA
8	133217753	133218409	657	*	10.15	10.48	9.73	0.74	3.41e-17	7.93e-14	Intron (ENST00000377862/ENSG00000104415, intron 1 of 2)	453	133237176	133241527	4352	2	ENSG00000104419	ENST00000521438	23118	10397	NDRG1	N-myc downstream regulated 1
7	158863256	158864504	1249	*	10.73	11.02	10.37	0.65	6.71e-17	1.51e-13	Intron (ENST00000407559/ENSG00000126870, intron 1 of 24)	452	158869446	158871499	2054	1	ENSG00000126870	ENST00000397143	-4942	55112	WDR60	WD repeat domain 60
5	137563331	137564817	1487	*	11.35	11.04	11.6	-0.57	1.21e-16	2.64e-13	Intron (ENST00000503916/ENSG00000152377, intron 1 of 4)	450	137112494	137598379	485886	2	ENSG00000152377	ENST00000503916	33562	6695	SPOCK1	SPARC (osteonectin), cwcv and kazal like domains proteoglycan 1
17	7440023	7441135	1113	*	10.42	10.72	10.05	0.67	1.6e-16	3.39e-13	Promoter (<=1kb)	462	7440742	7443556	2815	1	ENSG00000161958	ENST00000575398	0	2256	FGF11	fibroblast growth factor 11
7	130180598	130181128	531	*	7.57	8.17	6.55	1.62	1.84e-16	3.78e-13	Promoter (<=1kb)	452	130178459	130182057	3599	2	ENSG00000146842	ENST00000467599	929	84928	TMEM209	transmembrane protein 209
9	16246829	16247830	1002	*	8.73	9.18	8.08	1.09	2.34e-16	4.69e-13	Intron (ENST00000380685/ENSG00000205549, intron 1 of 3)	454	16203947	16253114	49168	2	ENSG00000205549	ENST00000433347	5284	100129385	C9orf92	chromosome 9 open reading frame 92
17	40312088	40312680	593	*	10.98	11.28	10.6	0.67	3.07e-16	5.98e-13	Promoter (2-3kb)	462	40309192	40348336	39145	1	ENSG00000131759	ENST00000577646	2896	5914	RARA	retinoic acid receptor alpha
20	37542231	37542616	386	*	7.09	7.76	5.79	1.97	3.43e-16	6.5e-13	Distal Intergenic	465	37530039	37530543	505	1	ENSG00000235044	ENST00000450588	12192	NA	NA	NA
12	120290745	120293310	2566	*	12.25	12.02	12.45	-0.43	4.83e-16	8.92e-13	Promoter (<=1kb)	457	120293097	120293237	141	2	ENSG00000200795	ENST00000363925	0	26835	RNU4-1	RNA, U4 small nuclear 1
20	45087839	45088786	948	*	10.01	10.33	9.59	0.74	6.55e-16	1.18e-12	Downstream (2-3kb)	465	45092310	45101112	8803	2	ENSG00000124134	ENST00000306117	12326	3787	KCNS1	potassium voltage-gated channel modifier subfamily S member 1
5	399429	400483	1055	*	12.13	11.9	12.32	-0.42	8.8e-16	1.55e-12	Intron (ENST00000505113/ENSG00000288622, intron 6 of 12)	450	403731	404546	816	2	ENSG00000214278	ENST00000515583	4063	NA	NA	NA
2	207394382	207395782	1401	*	10.73	11.01	10.38	0.63	9.84e-16	1.69e-12	Intron (ENST00000412387/ENSG00000223725, intron 3 of 4)	447	207269275	207269424	150	2	ENSG00000221628	ENST00000408701	-124958	100302130	MIR1302-4	microRNA 1302-4
19	18225812	18226451	640	*	9.19	9.57	8.68	0.89	1.23e-15	2.07e-12	Promoter (<=1kb)	464	18210831	18226425	15595	2	ENSG00000105650	ENST00000599188	0	5143	PDE4C	phosphodiesterase 4C
20	46958906	46959824	919	*	10.29	10.58	9.93	0.65	2.38e-15	3.9e-12	Intron (ENST00000357410/ENSG00000064655, intron 1 of 13)	465	46978235	46990070	11836	1	ENSG00000064655	ENST00000497428	-18411	2139	EYA2	EYA transcriptional coactivator and phosphatase 2
8	133320470	133320999	530	*	7.73	8.31	6.75	1.56	7.43e-15	1.19e-11	Distal Intergenic	453	133325997	133326404	408	1	ENSG00000243537	ENST00000479066	-4998	NA	NA	NA
8	129508390	129509007	618	*	7.58	8.17	6.56	1.62	8.52e-15	1.33e-11	Intron (ENST00000675388/ENSG00000229140, intron 1 of 8)	453	129484057	129484142	86	2	ENSG00000263763	ENST00000577904	-24248	100500839	MIR3686	microRNA 3686
17	44972812	44973380	569	*	10.14	10.46	9.74	0.71	1.41e-14	2.16e-11	Intron (ENST00000678938/ENSG00000136448, intron 1 of 11)	462	44959693	44968303	8611	2	ENSG00000131094	ENST00000253407	-4509	10882	C1QL1	complement C1q like 1
10	110209501	110210426	926	*	10.07	10.37	9.69	0.68	1.89e-14	2.84e-11	Promoter (<=1kb)	455	110210231	110286506	76276	1	ENSG00000119950	ENST00000361248	0	4601	MXI1	MAX interactor 1, dimerization protein
15	65295663	65296863	1201	*	11.72	11.45	11.95	-0.5	2.59e-14	3.81e-11	Promoter (<=1kb)	460	65296051	65296166	116	1	ENSG00000199568	ENST00000362698	0	26831	RNU5A-1	RNA, U5A small nuclear 1
1	15356055	15357282	1228	*	11	11.24	10.71	0.53	2.99e-14	4.31e-11	Promoter (<=1kb)	446	15357791	15364317	6527	1	ENSG00000142621	ENST00000483120	-509	114827	FHAD1	forkhead associated phosphopeptide binding domain 1
1	159910148	159910822	675	*	8.9	9.29	8.37	0.92	3.47e-14	4.9e-11	Promoter (<=1kb)	446	159910094	159910554	461	2	ENSG00000279430	ENST00000623350	0	NA	NA	NA
9	2621213	2623272	2060	*	12.04	12.22	11.83	0.4	7.13e-14	9.88e-11	Promoter (<=1kb)	454	2621787	2660056	38270	1	ENSG00000147852	ENST00000382100	0	7436	VLDLR	very low density lipoprotein receptor
19	2089698	2090679	982	*	9.51	9.85	9.08	0.77	9.81e-14	1.33e-10	Promoter (<=1kb)	464	2078372	2090176	11805	2	ENSG00000172081	ENST00000591326	0	126308	MOB3A	MOB kinase activator 3A
3	122977690	122978494	805	*	10.73	11	10.39	0.61	1.09e-13	1.46e-10	Promoter (1-2kb)	448	122943496	122976134	32639	2	ENSG00000082684	ENST00000465147	-1556	54437	SEMA5B	semaphorin 5B
5	93078281	93079331	1051	*	10.92	11.18	10.61	0.56	1.82e-13	2.38e-10	Distal Intergenic	450	93088856	93091768	2913	1	ENSG00000286509	ENST00000663805	-9525	NA	NA	NA
12	54428399	54429450	1052	*	10.46	10.72	10.15	0.57	3.11e-13	4e-10	Promoter (<=1kb)	457	54428303	54429403	1101	1	ENSG00000257477	ENST00000548617	96	NA	NA	NA
7	138752403	138753101	699	*	9.71	10.02	9.32	0.71	3.89e-13	4.92e-10	Promoter (2-3kb)	452	138706310	138755901	49592	2	ENSG00000105929	ENST00000644341	2800	50617	ATP6V0A4	ATPase H+ transporting V0 subunit a4
8	133227585	133228776	1192	*	8.79	9.19	8.25	0.94	4.47e-13	5.56e-10	3' UTR	453	133237176	133241527	4352	2	ENSG00000104419	ENST00000521438	12751	10397	NDRG1	N-myc downstream regulated 1
5	13510333	13511060	728	*	9.92	10.22	9.54	0.68	5.09e-13	6.22e-10	Distal Intergenic	450	13553654	13553966	313	2	ENSG00000248462	ENST00000503735	42906	NA	NA	NA
1	44730452	44731595	1144	*	11.61	11.38	11.8	-0.43	5.77e-13	6.93e-10	Promoter (<=1kb)	446	44731055	44731170	116	2	ENSG00000200169	ENST00000363299	0	26830	RNU5D-1	RNA, U5D small nuclear 1
7	151808401	151810070	1670	*	11.07	11.29	10.81	0.49	6.83e-13	8.07e-10	Promoter (1-2kb)	452	151806616	151807642	1027	1	ENSG00000242048	ENST00000481153	1785	644090	LOC644090	uncharacterized LOC644090
8	48930260	48930946	687	*	10.06	10.35	9.68	0.67	7.6e-13	8.83e-10	Exon (ENST00000668879/ENSG00000287788, exon 2 of 2)	453	48925917	48931288	5372	1	ENSG00000287788	ENST00000668879	4343	NA	NA	NA
1	12593571	12594028	458	*	9.82	10.14	9.42	0.72	8.51e-13	9.5e-10	Promoter (2-3kb)	446	12578718	12596308	17591	2	ENSG00000162496	ENST00000430996	2280	9249	DHRS3	dehydrogenase/reductase 3
1	11908074	11909973	1900	*	12.63	12.43	12.8	-0.37	8.52e-13	9.5e-10	Promoter (<=1kb)	446	11908152	11908271	120	1	ENSG00000199347	ENST00000362477	0	26829	RNU5E-1	RNA, U5E small nuclear 1
1	28648003	28649504	1502	*	12.16	11.97	12.33	-0.36	8.57e-13	9.5e-10	Promoter (<=1kb)	446	28648600	28648730	131	1	ENSG00000270103	ENST00000602813	0	NA	NA	NA
15	75666490	75667493	1004	*	11.4	11.65	11.11	0.53	8.76e-13	9.56e-10	Distal Intergenic	460	75676227	75677162	936	1	ENSG00000260892	ENST00000569467	-8734	NA	NA	NA
[truncated: 78,060 more rows]

## Sheet: 24h VH298
seqnames	start	end	width	strand	Conc	Conc_24v	Conc_0v	Fold	p.value	FDR	annotation	geneChr	geneStart	geneEnd	geneLength	geneStrand	geneId	transcriptId	distanceToTSS	ENTREZID	SYMBOL	GENENAME
[truncated: 76,558 more rows]

[truncated: 1 more sheets: Reox]
