# Supplementary material for: Regulation of chromatin accessibility by hypoxia and HIF
Source: Biochem J. 2022 Mar 28;479(6):767–86. doi: 10.1042/BCJ20220008 (PMC9022986; doi:10.1042/BCJ20220008)
Supplement: Supplementary Material 4 [file BCJ-479-767-s4.pdf]

## Sheet: HeLa 1h_up
ensembl_gene_id	log2FoldChange	pvalue	FDR	external_gene_name	gene_biotype	chromosome_name	start_position	end_position	strand
ENSG00000168209	1.01579	2.44e-158	3.46e-154	DDIT4	protein_coding	10	72273920	72276036	1
ENSG00000134107	1.00512	1.66e-145	1.18e-141	BHLHE40	protein_coding	3	4979116	4985323	1
ENSG00000148926	1.8574	5.33e-137	2.51e-133	ADM	protein_coding	11	10304680	10307397	1
ENSG00000129521	1.14072	4.91e-64	1.74e-60	EGLN3	protein_coding	14	33924231	34462774	-1
ENSG00000112715	0.681148	5.55e-50	1.57e-46	VEGFA	protein_coding	6	43770184	43786487	1
ENSG00000119938	0.879792	1.96e-39	4.62e-36	PPP1R3C	protein_coding	10	91628442	91633054	-1
ENSG00000247095	1.77202	1.29e-30	2.61e-27	MIR210HG	lincRNA	11	565660	568457	-1
ENSG00000059804	1.01159	3.08e-26	5.44e-23	SLC2A3	protein_coding	12	7919230	7936275	-1
ENSG00000186352	1.30883	1.27e-22	2e-19	ANKRD37	protein_coding	4	185396021	185400628	1
ENSG00000219607	1.18354	4.83e-17	4.27e-14	PPP1R3G	protein_coding	6	5084581	5089487	1
ENSG00000173281	0.816413	9.26e-15	7.7e-12	PPP1R3B	protein_coding	8	9136255	9151574	-1
ENSG00000135245	0.605836	6.24e-13	4.01e-10	HILPDA	protein_coding	7	128455849	128458418	1
ENSG00000127129	2.19826	3.2e-12	1.81e-09	EDN2	protein_coding	1	41478775	41484673	-1
ENSG00000164056	1.52736	1.86e-11	9.73e-09	SPRY1	protein_coding	4	123396795	123403760	1
ENSG00000213859	0.60588	5.28e-11	2.57e-08	KCTD11	protein_coding	17	7351889	7354944	1
ENSG00000241852	0.616358	3.25e-08	1.15e-05	C8orf58	protein_coding	8	22599601	22604150	1
ENSG00000256006	1.86018	1.01e-07	3.19e-05	AC084117.1	sense_intronic	11	18405609	18406731	1
ENSG00000114315	0.710475	1.01e-07	3.19e-05	HES1	protein_coding	3	194136145	194138732	1
ENSG00000139832	0.660679	1.96e-07	5.77e-05	RAB20	protein_coding	13	110523066	110561733	-1
ENSG00000279689	0.993296	3.81e-05	0.00656973	AC022400.8	TEC	10	73769264	73772862	-1
ENSG00000143590	0.760073	0.000148755	0.0206172	EFNA3	protein_coding	1	155078872	155087538	1
ENSG00000104419	0.653911	0.00020997	0.0272325	NDRG1	protein_coding	8	133237171	133302022	-1
ENSG00000100100	0.645291	0.000398639	0.047759	PIK3IP1	protein_coding	22	31281593	31292534	-1

## Sheet: HeLa 1h_down
ensembl_gene_id	log2FoldChange	pvalue	FDR	external_gene_name	gene_biotype	chromosome_name	start_position	end_position	strand
ENSG00000136244	-0.625906	1.28e-07	3.92e-05	IL6	protein_coding	7	22725884	22732002	1
ENSG00000081041	-0.675616	1.39e-05	0.00277289	CXCL2	protein_coding	4	74097035	74099293	-1

## Sheet: HeLa 24h_up
ensembl_gene_id	log2FoldChange	pvalue	FDR	external_gene_name	gene_biotype	chromosome_name	start_position	end_position	strand
ENSG00000107159	7.07509	3.46e-299	3.26e-296	CA9	protein_coding	9	35673856	35681159	1
ENSG00000104419	4.31698	3.46e-299	3.26e-296	NDRG1	protein_coding	8	133237171	133302022	-1
ENSG00000129521	3.49493	3.46e-299	3.26e-296	EGLN3	protein_coding	14	33924231	34462774	-1
ENSG00000111674	3.42555	3.46e-299	3.26e-296	ENO2	protein_coding	12	6913745	6923698	1
ENSG00000176171	3.38954	3.46e-299	3.26e-296	BNIP3	protein_coding	10	131966455	131982013	-1
ENSG00000146674	3.16774	3.46e-299	3.26e-296	IGFBP3	protein_coding	7	45912245	45921874	-1
ENSG00000181458	3.02139	3.46e-299	3.26e-296	TMEM45A	protein_coding	3	100492619	100577444	1
ENSG00000148926	2.98951	3.46e-299	3.26e-296	ADM	protein_coding	11	10304680	10307397	1
ENSG00000114268	2.8375	3.46e-299	3.26e-296	PFKFB4	protein_coding	3	48517684	48562015	-1
ENSG00000114023	2.39181	3.46e-299	3.26e-296	FAM162A	protein_coding	3	122384176	122412334	1
ENSG00000185499	2.27786	3.46e-299	3.26e-296	MUC1	protein_coding	1	155185824	155192916	-1
ENSG00000104765	2.18313	3.46e-299	3.26e-296	BNIP3L	protein_coding	8	26382898	26505636	1
ENSG00000134013	2.12679	3.46e-299	3.26e-296	LOXL2	protein_coding	8	23297189	23425328	-1
ENSG00000112715	2.06747	3.46e-299	3.26e-296	VEGFA	protein_coding	6	43770184	43786487	1
ENSG00000102144	2.00029	3.46e-299	3.26e-296	PGK1	protein_coding	X	77910739	78129296	1
ENSG00000162433	1.9704	3.46e-299	3.26e-296	AK4	protein_coding	1	65147549	65232145	1
ENSG00000105220	1.66635	3.46e-299	3.26e-296	GPI	protein_coding	19	34359480	34402413	1
ENSG00000111669	1.50559	3.46e-299	3.26e-296	TPI1	protein_coding	12	6867119	6870948	1
ENSG00000134333	1.44817	3.46e-299	3.26e-296	LDHA	protein_coding	11	18394388	18408425	1
ENSG00000117394	1.87117	2.24e-295	2e-292	SLC2A1	protein_coding	1	42925375	42959176	-1
ENSG00000163516	2.01724	5.09e-284	4.34e-281	ANKZF1	protein_coding	2	219229757	219236669	1
ENSG00000059804	2.99162	1.77e-256	1.44e-253	SLC2A3	protein_coding	12	7919230	7936275	-1
ENSG00000164096	1.77369	4.89e-253	3.81e-250	C4orf3	protein_coding	4	119296419	119304445	-1
ENSG00000122884	1.83564	5.32e-249	3.97e-246	P4HA1	protein_coding	10	73007217	73096974	-1
ENSG00000135766	1.66483	3.32e-247	2.38e-244	EGLN1	protein_coding	1	231363751	231425044	-1
ENSG00000159399	1.86036	4.16e-232	2.86e-229	HK2	protein_coding	2	74833981	74893359	1
ENSG00000131094	2.92571	5e-228	3.32e-225	C1QL1	protein_coding	17	44959693	44968071	-1
ENSG00000130821	1.71115	3.33e-218	2.13e-215	SLC6A8	protein_coding	X	153688099	153696593	1
ENSG00000175414	1.79867	1.15e-210	7.1e-208	ARL10	protein_coding	5	176365468	176401865	1
ENSG00000152256	2.26701	9.24e-209	5.52e-206	PDK1	protein_coding	2	172555373	172608669	1
ENSG00000152952	1.79995	1.84e-208	1.06e-205	PLOD2	protein_coding	3	146069440	146163653	-1
ENSG00000146242	1.65481	9.11e-197	5.1e-194	TPBG	protein_coding	6	82363206	82370828	1
ENSG00000110195	1.08154	1.02e-195	5.56e-193	FOLR1	protein_coding	11	72189558	72196323	1
ENSG00000177283	2.19974	3.88e-188	2.05e-185	FZD8	protein_coding	10	35638249	35642278	-1
ENSG00000116285	1.84114	1.48e-187	7.56e-185	ERRFI1	protein_coding	1	8004404	8026308	-1
ENSG00000125629	2.0745	4.92e-186	2.45e-183	INSIG2	protein_coding	2	118088452	118110997	1
ENSG00000106070	1.52099	6.95e-181	3.36e-178	GRB10	protein_coding	7	50590063	50793462	-1
ENSG00000079739	1.19942	1.1e-179	5.19e-177	PGM1	protein_coding	1	63593276	63660245	1
ENSG00000116260	1.65401	1.25e-176	5.76e-174	QSOX1	protein_coding	1	180154834	180204030	1
ENSG00000087266	1.69504	5.8e-171	2.6e-168	SH3BP2	protein_coding	4	2793023	2841098	1
ENSG00000072682	1.80234	5.35e-168	2.34e-165	P4HA2	protein_coding	5	132191838	132295315	-1
ENSG00000141526	1.12667	6.16e-167	2.63e-164	SLC16A3	protein_coding	17	82228397	82261129	1
ENSG00000196968	1.72373	2.2e-161	9.18e-159	FUT11	protein_coding	10	73772291	73780251	1
ENSG00000134107	1.18418	8.19e-161	3.33e-158	BHLHE40	protein_coding	3	4979116	4985323	1
ENSG00000168209	1.14069	7.67e-159	3.05e-156	DDIT4	protein_coding	10	72273920	72276036	1
ENSG00000161638	1.44027	1.06e-158	4.11e-156	ITGA5	protein_coding	12	54395261	54419460	-1
ENSG00000143847	6.69321	1.44e-158	5.48e-156	PPFIA4	protein_coding	1	203026498	203078740	1
ENSG00000115414	1.60444	5.03e-158	1.88e-155	FN1	protein_coding	2	215360440	215436172	-1
ENSG00000115548	1.54546	3.11e-156	1.14e-153	KDM3A	protein_coding	2	86440647	86492716	1
ENSG00000136295	1.28897	4.33e-156	1.55e-153	TTYH3	protein_coding	7	2631951	2664802	1
ENSG00000167772	3.93098	5.88e-156	2.07e-153	ANGPTL4	protein_coding	19	8363289	8374373	1
ENSG00000074410	1.63795	4.4e-151	1.52e-148	CA12	protein_coding	15	63321378	63382161	-1
ENSG00000013588	1.2906	4.6e-150	1.56e-147	GPRC5A	protein_coding	12	12890782	12917937	1
ENSG00000177169	1.46769	3.45e-149	1.14e-146	ULK1	protein_coding	12	131894651	131923167	1
ENSG00000149925	1.68203	4.99e-149	1.63e-146	ALDOA	protein_coding	16	30064164	30070457	1
ENSG00000113739	1.35396	8.81e-146	2.82e-143	STC2	protein_coding	5	173314713	173329503	-1
ENSG00000083444	1.35617	2.2e-145	6.9e-143	PLOD1	protein_coding	1	11934205	11975538	1
ENSG00000249992	1.7584	2.06e-144	6.37e-142	TMEM158	protein_coding	3	45224466	45226278	-1
ENSG00000183691	2.15965	1.24e-142	3.78e-140	NOG	protein_coding	17	56593699	56595590	1
ENSG00000119950	1.78724	2.02e-141	6.04e-139	MXI1	protein_coding	10	110207605	110287365	1
ENSG00000197930	1.57454	9.46e-139	2.78e-136	ERO1A	protein_coding	14	52639916	52695900	-1
ENSG00000197747	1.12949	1.63e-138	4.71e-136	S100A10	protein_coding	1	151982915	151994390	-1
ENSG00000171314	1.19351	5.8e-138	1.65e-135	PGAM1	protein_coding	10	97426160	97433441	1
ENSG00000145623	1.11688	9.76e-138	2.73e-135	OSMR	protein_coding	5	38845858	38945596	1
ENSG00000247095	3.51415	3.98e-135	1.1e-132	MIR210HG	lincRNA	11	565660	568457	-1
ENSG00000186480	1.45194	8.73e-134	2.37e-131	INSIG1	protein_coding	7	155297776	155310235	1
ENSG00000138764	1.65464	9.83e-134	2.63e-131	CCNG2	protein_coding	4	77157151	77433388	1
ENSG00000213859	2.34558	3.01e-133	7.94e-131	KCTD11	protein_coding	17	7351889	7354944	1
ENSG00000067225	0.90409	5.3e-133	1.38e-130	PKM	protein_coding	15	72199029	72231822	-1
ENSG00000155876	1.12566	6.78e-132	1.74e-129	RRAGA	protein_coding	9	19049395	19050983	1
ENSG00000141959	1.36132	1.39e-131	3.5e-129	PFKL	protein_coding	21	44300051	44327376	1
ENSG00000145730	1.27078	6.71e-131	1.67e-128	PAM	protein_coding	5	102753981	103031105	1
ENSG00000175265	1.62091	9.43e-129	2.31e-126	GOLGA8A	protein_coding	15	34379068	34437466	-1
ENSG00000180448	1.28299	1.91e-127	4.63e-125	ARHGAP45	protein_coding	19	1065923	1086628	1
ENSG00000104812	1.46809	1.74e-125	4.17e-123	GYS1	protein_coding	19	48968125	48993310	-1
ENSG00000117266	2.06105	2.46e-125	5.81e-123	CDK18	protein_coding	1	205504595	205532793	1
ENSG00000118898	1.11288	2.43e-122	5.65e-120	PPL	protein_coding	16	4882507	4960741	-1
ENSG00000219607	3.16482	5.16e-122	1.19e-119	PPP1R3G	protein_coding	6	5084581	5089487	1
ENSG00000075426	1.08047	3.27e-120	7.42e-118	FOSL2	protein_coding	2	28392448	28417312	1
ENSG00000132432	1.24714	1.07e-119	2.39e-117	SEC61G	protein_coding	7	54752250	54759974	-1
ENSG00000135245	1.91301	5.37e-117	1.19e-114	HILPDA	protein_coding	7	128455849	128458418	1
ENSG00000074800	0.892963	5.82e-116	1.27e-113	ENO1	protein_coding	1	8861000	8879250	-1
ENSG00000130635	1.32864	1.36e-113	2.94e-111	COL5A1	protein_coding	9	134641774	134844843	1
ENSG00000067057	1.12455	4.96e-113	1.06e-110	PFKP	protein_coding	10	3066333	3137712	1
ENSG00000167695	1.2988	1.54e-110	3.24e-108	FAM57A	protein_coding	17	732412	742972	1
ENSG00000186918	2.72068	2.28e-110	4.75e-108	ZNF395	protein_coding	8	28345585	28402701	-1
ENSG00000114480	1.32904	9.35e-110	1.93e-107	GBE1	protein_coding	3	81489699	81762161	-1
ENSG00000134824	0.869503	2.08e-109	4.24e-107	FADS2	protein_coding	11	61792980	61867354	1
ENSG00000156515	0.925708	2.15e-108	4.32e-106	HK1	protein_coding	10	69269984	69401884	1
ENSG00000061656	2.99716	6.03e-107	1.2e-104	SPAG4	protein_coding	20	35615892	35621049	1
ENSG00000181577	1.81883	8.23e-107	1.62e-104	C6orf223	protein_coding	6	44000580	44005958	1
ENSG00000107819	1.11959	1.49e-103	2.91e-101	SFXN3	protein_coding	10	101031234	101041244	1
ENSG00000111640	0.964881	4e-103	7.71e-101	GAPDH	protein_coding	12	6533927	6538374	1
ENSG00000105974	0.914868	1.8e-102	3.44e-100	CAV1	protein_coding	7	116524785	116561184	1
ENSG00000109107	4.06687	1.3e-101	2.45e-99	ALDOC	protein_coding	17	28573115	28577264	-1
ENSG00000162591	1.16948	2.86e-100	5.35e-98	MEGF6	protein_coding	1	3489920	3611495	-1
ENSG00000011347	3.61054	5.28e-100	9.76e-98	SYT7	protein_coding	11	61515313	61581148	-1
ENSG00000117525	1.37916	1.6e-99	2.92e-97	F3	protein_coding	1	94529225	94541800	-1
ENSG00000112379	2.19328	1.36e-95	2.46e-93	ARFGEF3	protein_coding	6	138161921	138344663	1
ENSG00000068971	1.75638	2.29e-94	4.1e-92	PPP2R5B	protein_coding	11	64917553	64934473	1
ENSG00000118495	1.05549	7.19e-93	1.28e-90	PLAGL1	protein_coding	6	143940300	144064599	-1
ENSG00000181744	1.31664	2.2e-90	3.87e-88	C3orf58	protein_coding	3	143971798	144048719	1
ENSG00000147852	3.27504	2.48e-90	4.32e-88	VLDLR	protein_coding	9	2621834	2660053	1
ENSG00000173548	1.19244	6.6e-88	1.14e-85	SNX33	protein_coding	15	75647906	75662301	1
ENSG00000197562	1.31965	1.64e-87	2.8e-85	RAB40C	protein_coding	16	589357	629272	1
ENSG00000170525	1.16549	1.34e-86	2.27e-84	PFKFB3	protein_coding	10	6144934	6254644	1
ENSG00000164619	2.09603	3.86e-85	6.46e-83	BMPER	protein_coding	7	33904308	34156356	1
ENSG00000144320	1.33098	6.62e-85	1.09e-82	LNPK	protein_coding	2	175923892	176002839	-1
ENSG00000197226	0.830421	6.64e-85	1.09e-82	TBC1D9B	protein_coding	5	179862066	179907859	-1
ENSG00000116977	1.30357	1.17e-83	1.91e-81	LGALS8	protein_coding	1	236518000	236552981	1
ENSG00000109046	1.05893	5.48e-83	8.85e-81	WSB1	protein_coding	17	27294076	27315926	1
ENSG00000113083	2.17783	5.82e-83	9.31e-81	LOX	protein_coding	5	122063195	122078360	-1
ENSG00000160972	1.08775	1.43e-82	2.27e-80	PPP1R16A	protein_coding	8	144477969	144502121	1
ENSG00000214193	2.61105	6.19e-81	9.73e-79	SH3D21	protein_coding	1	36306387	36324886	1
ENSG00000197355	1.15373	3.64e-79	5.67e-77	UAP1L1	protein_coding	9	137077501	137084539	1
ENSG00000172081	1.62444	5e-79	7.72e-77	MOB3A	protein_coding	19	2071038	2096673	-1
ENSG00000048740	2.73475	1.24e-78	1.89e-76	CELF2	protein_coding	10	10798397	11336675	1
ENSG00000137331	1.24253	1.65e-77	2.51e-75	IER3	protein_coding	6	30743199	30744554	-1
ENSG00000183258	0.96268	1.69e-76	2.54e-74	DDX41	protein_coding	5	177511577	177517469	-1
ENSG00000091542	0.954616	2.46e-76	3.67e-74	ALKBH5	protein_coding	17	18183078	18209954	1
ENSG00000171388	2.32089	6.47e-75	9.58e-73	APLN	protein_coding	X	129645259	129654937	-1
ENSG00000145901	1.21133	3.36e-73	4.93e-71	TNIP1	protein_coding	5	151029945	151093577	-1
ENSG00000158825	1.00747	8.79e-73	1.28e-70	CDA	protein_coding	1	20588948	20618908	1
ENSG00000146094	1.8682	2.37e-72	3.43e-70	DOK3	protein_coding	5	177501907	177511274	-1
ENSG00000169032	0.940379	6.41e-72	9.19e-70	MAP2K1	protein_coding	15	66386817	66492312	1
ENSG00000024422	0.728929	1.38e-71	1.96e-69	EHD2	protein_coding	19	47713343	47743134	1
ENSG00000034510	0.62276	3.05e-71	4.27e-69	TMSB10	protein_coding	2	84905625	84906675	1
ENSG00000168159	0.747413	4.57e-71	6.35e-69	RNF187	protein_coding	1	228487061	228495766	1
ENSG00000114270	0.823452	4.9e-71	6.76e-69	COL7A1	protein_coding	3	48564073	48595267	-1
ENSG00000196365	0.694626	1.14e-69	1.56e-67	LONP1	protein_coding	19	5691834	5720572	-1
ENSG00000127663	1.06011	1.36e-68	1.84e-66	KDM4B	protein_coding	19	4969113	5153595	1
ENSG00000160445	0.943148	1.59e-68	2.14e-66	ZER1	protein_coding	9	128729786	128772414	-1
ENSG00000005448	1.24457	1.75e-68	2.34e-66	WDR54	protein_coding	2	74421678	74425755	1
ENSG00000177181	4.96775	9.84e-68	1.31e-65	RIMKLA	protein_coding	1	42380795	42422578	1
ENSG00000116685	0.905422	4.95e-67	6.51e-65	KIAA2013	protein_coding	1	11919591	11926428	-1
ENSG00000105137	0.898772	1.02e-66	1.33e-64	SYDE1	protein_coding	19	15107403	15114988	1
ENSG00000185033	1.3061	1.09e-66	1.42e-64	SEMA4B	protein_coding	15	90160604	90229679	1
ENSG00000185950	1.04369	1.5e-64	1.93e-62	IRS2	protein_coding	13	109752698	109786568	-1
ENSG00000135924	1.11962	3.58e-64	4.58e-62	DNAJB2	protein_coding	2	219279267	219286900	1
ENSG00000124762	1.11675	8.24e-63	1.05e-60	CDKN1A	protein_coding	6	36676460	36687339	1
ENSG00000148700	0.874179	8.7e-63	1.1e-60	ADD3	protein_coding	10	109996368	110135565	1
ENSG00000147689	1.4263	1.18e-62	1.48e-60	FAM83A	protein_coding	8	123178960	123210079	1
ENSG00000131389	0.792658	1.9e-62	2.37e-60	SLC6A6	protein_coding	3	14402576	14489349	1
ENSG00000130720	2.49786	6.44e-62	7.96e-60	FIBCD1	protein_coding	9	130902438	130939286	-1
ENSG00000082153	0.835579	9.57e-62	1.17e-59	BZW1	protein_coding	2	200810594	200827338	1
ENSG00000213672	0.908304	2.34e-61	2.86e-59	NCKIPSD	protein_coding	3	48673844	48686364	-1
ENSG00000164078	1.33713	5.44e-61	6.59e-59	MST1R	protein_coding	3	49887002	49903873	-1
ENSG00000106688	1.16982	8.09e-61	9.73e-59	SLC1A1	protein_coding	9	4490444	4587469	1
ENSG00000130827	0.836147	1.85e-60	2.2e-58	PLXNA3	protein_coding	X	154458281	154477779	1
ENSG00000155508	0.812528	5.3e-60	6.28e-58	CNOT8	protein_coding	5	154857553	154876793	1
ENSG00000133639	0.860616	8.51e-60	1e-57	BTG1	protein_coding	12	92140278	92145897	-1
ENSG00000044524	2.05353	9.35e-60	1.09e-57	EPHA3	protein_coding	3	89107524	89482134	1
ENSG00000147872	1.94381	2.34e-58	2.7e-56	PLIN2	protein_coding	9	19108375	19149290	-1
ENSG00000100234	0.857481	3.62e-58	4.16e-56	TIMP3	protein_coding	22	32801701	32863043	1
ENSG00000225697	0.909909	5.78e-58	6.6e-56	SLC26A6	protein_coding	3	48625723	48635493	-1
ENSG00000134590	0.77158	1.4e-57	1.59e-55	RTL8C	protein_coding	X	135032366	135033546	1
ENSG00000141258	0.833876	4.42e-57	4.97e-55	SGSM2	protein_coding	17	2337498	2381058	1
ENSG00000168214	0.889494	6.5e-57	7.28e-55	RBPJ	protein_coding	4	26163455	26435131	1
ENSG00000173727	1.77185	9.63e-57	1.07e-54	AP000769.1	transcribed_unprocessed_pseudogene	11	65455258	65466720	1
ENSG00000260822	1.48493	9.64e-57	1.07e-54	AC004656.1	sense_overlapping	X	24545516	24550466	1
ENSG00000198925	0.76311	3.7e-56	4.06e-54	ATG9A	protein_coding	2	219219380	219229717	-1
ENSG00000126804	1.02266	4.04e-56	4.41e-54	ZBTB1	protein_coding	14	64503712	64533690	1
ENSG00000129757	1.01743	4.55e-56	4.94e-54	CDKN1C	protein_coding	11	2883213	2885773	-1
ENSG00000139832	2.02962	2.88e-55	3.11e-53	RAB20	protein_coding	13	110523066	110561733	-1
ENSG00000106327	1.54813	6.28e-55	6.74e-53	TFR2	protein_coding	7	100620416	100642779	-1
ENSG00000160285	0.762317	2.29e-54	2.44e-52	LSS	protein_coding	21	46188141	46228824	-1
ENSG00000240694	0.985231	1.25e-53	1.32e-51	PNMA2	protein_coding	8	26504686	26514092	-1
ENSG00000186642	0.611953	1.44e-53	1.52e-51	PDE2A	protein_coding	11	72576141	72674591	-1
ENSG00000141279	0.611095	2.44e-53	2.55e-51	NPEPPS	protein_coding	17	47522942	47623276	1
ENSG00000173221	1.06239	2.58e-53	2.68e-51	GLRX	protein_coding	5	95751319	95823005	-1
ENSG00000157510	1.50541	3.17e-53	3.28e-51	AFAP1L1	protein_coding	5	149271871	149341802	1
ENSG00000114120	0.941443	8.53e-53	8.78e-51	SLC25A36	protein_coding	3	140941830	140980961	1
ENSG00000072778	0.645343	1.83e-52	1.87e-50	ACADVL	protein_coding	17	7217125	7225273	1
ENSG00000100097	0.69468	3.77e-52	3.84e-50	LGALS1	protein_coding	22	37675608	37679806	1
ENSG00000004399	0.929228	6.02e-52	6.1e-50	PLXND1	protein_coding	3	129555175	129606818	-1
ENSG00000196639	1.00094	1.43e-51	1.44e-49	HRH1	protein_coding	3	11137093	11263557	1
ENSG00000069667	3.98875	2.63e-51	2.63e-49	RORA	protein_coding	15	60488284	61229319	-1
ENSG00000165655	0.745821	4.17e-51	4.15e-49	ZNF503	protein_coding	10	75397830	75401906	-1
ENSG00000185100	1.50057	7.52e-51	7.44e-49	ADSSL1	protein_coding	14	104724186	104747325	1
ENSG00000227036	1.72056	1.01e-50	9.92e-49	LINC00511	processed_transcript	17	72290091	72640472	-1
ENSG00000198517	0.857347	4.22e-50	4.13e-48	MAFK	protein_coding	7	1530714	1543043	1
ENSG00000173281	1.67581	4.68e-50	4.56e-48	PPP1R3B	protein_coding	8	9136255	9151574	-1
ENSG00000169583	1.59546	1.31e-49	1.27e-47	CLIC3	protein_coding	9	136994635	136996803	-1
ENSG00000136830	0.610868	1.35e-49	1.29e-47	FAM129B	protein_coding	9	127505339	127578989	-1
ENSG00000183255	0.635337	2.16e-49	2.06e-47	PTTG1IP	protein_coding	21	44849585	44873903	-1
ENSG00000164056	3.31917	5.65e-49	5.36e-47	SPRY1	protein_coding	4	123396795	123403760	1
ENSG00000115756	0.709029	1.21e-48	1.14e-46	HPCAL1	protein_coding	2	10302889	10427617	1
ENSG00000167815	0.692929	2.06e-48	1.92e-46	PRDX2	protein_coding	19	12796820	12801859	-1
ENSG00000198753	1.7327	2.27e-48	2.11e-46	PLXNB3	protein_coding	X	153764196	153779346	1
ENSG00000143320	1.55322	2.84e-48	2.62e-46	CRABP2	protein_coding	1	156699606	156705816	-1
ENSG00000214357	0.882087	4.36e-48	4.01e-46	NEURL1B	protein_coding	5	172641266	172691540	1
ENSG00000127526	0.823529	4.71e-48	4.3e-46	SLC35E1	protein_coding	19	16549831	16572382	-1
ENSG00000126001	0.894759	1.91e-47	1.74e-45	CEP250	protein_coding	20	35455164	35519280	1
ENSG00000092964	0.772373	2.54e-47	2.3e-45	DPYSL2	protein_coding	8	26514022	26658178	1
ENSG00000185624	0.718335	7.15e-47	6.41e-45	P4HB	protein_coding	17	81843159	81860694	-1
ENSG00000167771	2.44656	9.02e-47	8.03e-45	RCOR2	protein_coding	11	63911221	63916844	-1
ENSG00000131746	0.708492	9.32e-47	8.27e-45	TNS4	protein_coding	17	40475828	40501597	-1
ENSG00000176845	0.87851	2.03e-46	1.79e-44	METRNL	protein_coding	17	83079691	83095119	1
ENSG00000166165	0.58557	3.03e-46	2.67e-44	CKB	protein_coding	14	103519659	103523111	-1
ENSG00000068305	0.830424	3.16e-46	2.76e-44	MEF2A	protein_coding	15	99565417	99716466	1
ENSG00000116017	1.38846	4.19e-46	3.63e-44	ARID3A	protein_coding	19	925781	975934	1
ENSG00000104331	0.744724	4.19e-46	3.63e-44	IMPAD1	protein_coding	8	56957933	56993844	-1
ENSG00000121966	0.585773	1.45e-45	1.24e-43	CXCR4	protein_coding	2	136114349	136118165	-1
ENSG00000095303	1.82933	1.72e-45	1.47e-43	PTGS1	protein_coding	9	122370530	122395703	1
ENSG00000107077	0.920843	1.8e-45	1.53e-43	KDM4C	protein_coding	9	6720863	7175648	1
ENSG00000112941	0.60251	2.19e-45	1.85e-43	TENT4A	protein_coding	5	6713007	6757048	1
ENSG00000088340	4.01679	6.32e-45	5.31e-43	FER1L4	transcribed_unitary_pseudogene	20	35558737	35607562	-1
ENSG00000144579	0.646186	1.19e-44	9.84e-43	CTDSP1	protein_coding	2	218398256	218405941	1
ENSG00000217801	1.99136	2.41e-44	1.99e-42	AL390719.1	transcribed_unprocessed_pseudogene	1	1059734	1069355	1
ENSG00000156381	0.90328	3.14e-44	2.58e-42	ANKRD9	protein_coding	14	102501760	102509799	-1
ENSG00000067992	1.35421	3.68e-44	3.01e-42	PDK3	protein_coding	X	24465221	24541862	1
ENSG00000163872	0.775549	4.01e-44	3.26e-42	YEATS2	protein_coding	3	183697818	183812625	1
ENSG00000173442	0.616357	6.75e-44	5.42e-42	EHBP1L1	protein_coding	11	65576038	65592650	1
ENSG00000197321	0.674398	1.18e-43	9.44e-42	SVIL	protein_coding	10	29457338	29736781	-1
ENSG00000079432	0.634396	1.21e-43	9.62e-42	CIC	protein_coding	19	42268537	42295797	1
ENSG00000169242	0.908071	2.08e-43	1.64e-41	EFNA1	protein_coding	1	155127460	155134857	1
ENSG00000166484	1.03791	3.23e-43	2.54e-41	MAPK7	protein_coding	17	19377721	19383544	1
ENSG00000165915	0.722751	5.99e-43	4.69e-41	SLC39A13	protein_coding	11	47407132	47416501	1
ENSG00000137699	0.916435	1.1e-42	8.59e-41	TRIM29	protein_coding	11	120111275	120185529	-1
ENSG00000109736	0.702899	6.22e-42	4.82e-40	MFSD10	protein_coding	4	2930561	2934859	-1
ENSG00000163814	1.52686	1.52e-41	1.17e-39	CDCP1	protein_coding	3	45082278	45146422	-1
ENSG00000185022	1.351	2.11e-41	1.62e-39	MAFF	protein_coding	22	38200767	38216511	1
ENSG00000100504	0.751321	2.35e-41	1.79e-39	PYGL	protein_coding	14	50857891	50944736	-1
ENSG00000161996	0.745154	2.35e-41	1.79e-39	WDR90	protein_coding	16	649311	667833	1
ENSG00000141985	0.647018	7.66e-41	5.82e-39	SH3GL1	protein_coding	19	4360370	4400547	-1
ENSG00000101210	0.746031	8.05e-41	6.09e-39	EEF1A2	protein_coding	20	63488012	63499322	-1
ENSG00000170379	2.99406	8.67e-41	6.53e-39	TCAF2	protein_coding	7	143620952	143730409	1
ENSG00000166123	0.918422	2.39e-40	1.79e-38	GPT2	protein_coding	16	46884378	46931297	1
ENSG00000151882	2.53594	2.75e-40	2.04e-38	CCL28	protein_coding	5	43376645	43412391	-1
ENSG00000143878	0.743296	3.28e-40	2.43e-38	RHOB	protein_coding	2	20447074	20449445	1
ENSG00000240972	0.842024	8.67e-40	6.36e-38	MIF	protein_coding	22	23894004	23895227	1
ENSG00000188994	0.914081	1.08e-39	7.87e-38	ZNF292	protein_coding	6	87152833	87264196	1
ENSG00000164105	0.87882	1.58e-39	1.15e-37	SAP30	protein_coding	4	173369969	173377532	1
ENSG00000251493	1.93222	1.9e-39	1.38e-37	FOXD1	protein_coding	5	73444827	73448527	-1
ENSG00000019549	1.26557	3.64e-39	2.63e-37	SNAI2	protein_coding	8	48917604	48921740	-1
ENSG00000101654	0.750158	4.45e-39	3.2e-37	RNMT	protein_coding	18	13726660	13764558	1
ENSG00000124831	0.598794	6.18e-39	4.43e-37	LRRFIP1	protein_coding	2	237627576	237813682	1
ENSG00000074181	0.8439	7.48e-39	5.34e-37	NOTCH3	protein_coding	19	15159038	15200981	-1
ENSG00000140939	0.935584	1.11e-38	7.9e-37	NOL3	protein_coding	16	67170154	67175735	1
ENSG00000161921	2.18254	1.13e-38	8.02e-37	CXCL16	protein_coding	17	4733526	4739922	-1
ENSG00000142156	1.59529	1.93e-38	1.36e-36	COL6A1	protein_coding	21	45981737	46005050	1
ENSG00000130731	0.900211	2.49e-38	1.75e-36	METTL26	protein_coding	16	634427	636366	-1
ENSG00000178802	0.873704	2.52e-38	1.76e-36	MPI	protein_coding	15	74890005	74902219	1
ENSG00000108039	0.781345	1.39e-37	9.62e-36	XPNPEP1	protein_coding	10	109864766	109923553	-1
ENSG00000107816	0.721915	1.43e-37	9.89e-36	LZTS2	protein_coding	10	100996618	101007836	1
ENSG00000169184	0.659542	1.81e-37	1.25e-35	MN1	protein_coding	22	27748277	27801498	-1
ENSG00000183111	1.83134	1.88e-37	1.29e-35	ARHGEF37	protein_coding	5	149551947	149634968	1
ENSG00000091622	0.76362	2.87e-37	1.96e-35	PITPNM3	protein_coding	17	6451264	6556494	-1
ENSG00000185269	1.96583	2.93e-37	1.99e-35	NOTUM	protein_coding	17	81952507	81961840	-1
ENSG00000225138	1.16229	6.56e-37	4.45e-35	SLC9A3-AS1	processed_transcript	5	473236	480884	1
ENSG00000101400	1.01095	1.13e-36	7.62e-35	SNTA1	protein_coding	20	33407955	33443892	-1
ENSG00000170017	0.587825	1.14e-36	7.62e-35	ALCAM	protein_coding	3	105366909	105576900	1
ENSG00000099194	0.594674	2.19e-36	1.47e-34	SCD	protein_coding	10	100347124	100364834	1
ENSG00000108861	0.657592	3.01e-36	2.01e-34	DUSP3	protein_coding	17	43766121	43778988	-1
ENSG00000197381	0.62989	3.2e-36	2.12e-34	ADARB1	protein_coding	21	45073853	45226560	1
ENSG00000147027	1.07062	3.64e-36	2.41e-34	TMEM47	protein_coding	X	34627064	34657288	-1
ENSG00000124006	0.88623	4.13e-36	2.72e-34	OBSL1	protein_coding	2	219550729	219571859	-1
ENSG00000214517	0.606599	5.49e-36	3.6e-34	PPME1	protein_coding	11	74171099	74254703	1
ENSG00000164442	0.778091	6.06e-36	3.96e-34	CITED2	protein_coding	6	139371807	139374620	-1
ENSG00000186352	1.75926	1.01e-35	6.56e-34	ANKRD37	protein_coding	4	185396021	185400628	1
ENSG00000073060	0.581833	1.45e-35	9.35e-34	SCARB1	protein_coding	12	124776856	124882668	-1
ENSG00000142669	0.721701	3.17e-35	2.02e-33	SH3BGRL3	protein_coding	1	26279176	26281522	1
ENSG00000170955	0.754095	3.56e-35	2.26e-33	CAVIN3	protein_coding	11	6318946	6320647	-1
ENSG00000176700	1.43805	7.09e-35	4.45e-33	SCAND2P	transcribed_unprocessed_pseudogene	15	84631451	84647478	1
ENSG00000139433	0.832193	7.37e-35	4.62e-33	GLTP	protein_coding	12	109850943	109880488	-1
ENSG00000139725	0.72329	1.04e-34	6.47e-33	RHOF	protein_coding	12	121777754	121803403	-1
ENSG00000196739	0.892874	2.04e-34	1.26e-32	COL27A1	protein_coding	9	114155560	114312511	1
ENSG00000099942	0.593957	3.8e-34	2.34e-32	CRKL	protein_coding	22	20917426	20953749	1
ENSG00000120693	2.01701	5.37e-34	3.28e-32	SMAD9	protein_coding	13	36844831	36920765	-1
ENSG00000105835	0.692681	6.86e-34	4.17e-32	NAMPT	protein_coding	7	106248285	106286326	-1
ENSG00000142173	3.05828	1.05e-33	6.37e-32	COL6A2	protein_coding	21	46098097	46132849	1
ENSG00000010818	0.860942	3.71e-33	2.21e-31	HIVEP2	protein_coding	6	142751467	142956698	-1
ENSG00000175874	0.963404	4.13e-33	2.46e-31	CREG2	protein_coding	2	101345551	101387595	-1
ENSG00000069998	0.790397	4.45e-33	2.64e-31	HDHD5	protein_coding	22	17137511	17165287	-1
ENSG00000089876	0.678471	5.62e-33	3.32e-31	DHX32	protein_coding	10	125836337	125896436	-1
ENSG00000265972	1.18563	6.25e-33	3.68e-31	TXNIP	protein_coding	1	145992435	145996600	-1
ENSG00000268621	0.947335	8.93e-33	5.24e-31	IGFL2-AS1	lincRNA	19	46189166	46203083	-1
ENSG00000101782	0.709965	9.02e-33	5.28e-31	RIOK3	protein_coding	18	23452823	23486603	1
ENSG00000132510	0.880183	1.06e-32	6.21e-31	KDM6B	protein_coding	17	7839904	7854796	1
ENSG00000090339	1.10184	1.11e-32	6.46e-31	ICAM1	protein_coding	19	10270835	10286615	1
ENSG00000123240	0.683263	1.12e-32	6.48e-31	OPTN	protein_coding	10	13099449	13138308	1
ENSG00000134109	0.693783	1.85e-32	1.07e-30	EDEM1	protein_coding	3	5187646	5219957	1
ENSG00000179335	0.725255	2.17e-32	1.25e-30	CLK3	protein_coding	15	74598500	74645414	1
ENSG00000153048	0.749004	4.21e-32	2.39e-30	CARHSP1	protein_coding	16	8852942	8869012	-1
ENSG00000073756	1.10593	1.01e-31	5.7e-30	PTGS2	protein_coding	1	186671791	186680427	-1
ENSG00000164849	2.84936	3.76e-31	2.11e-29	GPR146	protein_coding	7	1044576	1059261	1
ENSG00000175938	1.94233	4.07e-31	2.27e-29	ORAI3	protein_coding	16	30949066	30956461	1
ENSG00000177150	0.809046	9.12e-31	5.04e-29	FAM210A	protein_coding	18	13663347	13726663	-1
ENSG00000167971	2.46703	1.09e-30	6.02e-29	CASKIN1	protein_coding	16	2177180	2196525	-1
ENSG00000172890	0.717821	1.2e-30	6.62e-29	NADSYN1	protein_coding	11	71453109	71524107	1
ENSG00000102312	1.03341	1.21e-30	6.63e-29	PORCN	protein_coding	X	48508962	48520814	1
ENSG00000167552	0.720465	1.31e-30	7.15e-29	TUBA1A	protein_coding	12	49184796	49189324	-1
ENSG00000143590	2.55557	1.34e-30	7.27e-29	EFNA3	protein_coding	1	155078872	155087538	1
ENSG00000141580	0.590186	1.61e-30	8.74e-29	WDR45B	protein_coding	17	82614562	82648553	-1
ENSG00000184731	1.84869	2.81e-30	1.51e-28	FAM110C	protein_coding	2	38814	46870	-1
ENSG00000165312	0.952593	3.72e-30	2e-28	OTUD1	protein_coding	10	23439458	23442390	1
ENSG00000114646	2.19275	3.98e-30	2.13e-28	CSPG5	protein_coding	3	47562239	47580792	-1
ENSG00000187193	2.13016	4.09e-30	2.19e-28	MT1X	protein_coding	16	56682424	56684196	1
ENSG00000102172	0.603771	4.23e-30	2.25e-28	SMS	protein_coding	X	21940573	21994835	1
ENSG00000007516	2.69941	1.47e-29	7.74e-28	BAIAP3	protein_coding	16	1333601	1349441	1
ENSG00000143499	0.703666	1.66e-29	8.7e-28	SMYD2	protein_coding	1	214281102	214337131	1
ENSG00000159216	0.74625	1.73e-29	9.06e-28	RUNX1	protein_coding	21	34787801	36004667	-1
ENSG00000175931	0.606841	1.87e-29	9.72e-28	UBE2O	protein_coding	17	76389451	76453206	-1
ENSG00000164855	0.88994	2.16e-29	1.12e-27	TMEM184A	protein_coding	7	1542235	1560821	-1
ENSG00000111328	0.616091	2.3e-29	1.19e-27	CDK2AP1	protein_coding	12	123260971	123272334	-1
ENSG00000153531	1.3695	3.85e-29	1.99e-27	ADPRHL1	protein_coding	13	113399610	113453524	-1
ENSG00000104881	0.661737	4.12e-29	2.12e-27	PPP1R13L	protein_coding	19	45379634	45406349	-1
ENSG00000165891	0.595083	6.53e-29	3.34e-27	E2F7	protein_coding	12	77021247	77065580	-1
ENSG00000100058	0.855626	6.99e-29	3.57e-27	CRYBB2P1	transcribed_unprocessed_pseudogene	22	25448105	25520854	1
ENSG00000099991	0.641773	7.89e-29	4.01e-27	CABIN1	protein_coding	22	24011192	24178628	1
ENSG00000118263	0.659576	8.4e-29	4.25e-27	KLF7	protein_coding	2	207074137	207167267	-1
ENSG00000196843	1.44386	2.23e-28	1.12e-26	ARID5A	protein_coding	2	96536743	96552638	1
ENSG00000178038	1.04244	2.29e-28	1.14e-26	ALS2CL	protein_coding	3	46668997	46693704	-1
ENSG00000135750	0.607348	2.8e-28	1.39e-26	KCNK1	protein_coding	1	233614004	233672512	1
ENSG00000175130	0.667807	3.46e-28	1.71e-26	MARCKSL1	protein_coding	1	32333832	32336379	-1
ENSG00000119938	0.797258	4.01e-28	1.97e-26	PPP1R3C	protein_coding	10	91628442	91633054	-1
ENSG00000151748	0.735185	6.97e-28	3.41e-26	SAV1	protein_coding	14	50632058	50668331	-1
ENSG00000145040	1.07177	8e-28	3.91e-26	UCN2	protein_coding	3	48561727	48563773	-1
ENSG00000160999	1.59153	9.15e-28	4.45e-26	SH2B2	protein_coding	7	102285091	102321711	1
ENSG00000182054	1.01195	1.45e-27	6.96e-26	IDH2	protein_coding	15	90083045	90102504	-1
ENSG00000241852	1.31632	1.64e-27	7.88e-26	C8orf58	protein_coding	8	22599601	22604150	1
ENSG00000137819	1.02023	1.88e-27	9.01e-26	PAQR5	protein_coding	15	69298947	69407780	1
ENSG00000165030	0.947815	3.09e-27	1.47e-25	NFIL3	protein_coding	9	91409045	91423862	-1
ENSG00000112096	0.735301	3.53e-27	1.67e-25	SOD2	protein_coding	6	159669057	159745186	-1
ENSG00000101187	1.41039	5.44e-27	2.57e-25	SLCO4A1	protein_coding	20	62642445	62685785	1
ENSG00000235194	1.28999	5.84e-27	2.76e-25	PPP1R3E	protein_coding	14	23295643	23302848	-1
ENSG00000103507	0.661487	6.2e-27	2.91e-25	BCKDK	protein_coding	16	31106107	31112791	1
ENSG00000164251	1.16006	7.66e-27	3.58e-25	F2RL1	protein_coding	5	76818933	76835315	1
ENSG00000146278	0.609487	1.02e-26	4.75e-25	PNRC1	protein_coding	6	89080751	89085160	1
ENSG00000134369	0.670448	1.09e-26	5.05e-25	NAV1	protein_coding	1	201622885	201826969	1
ENSG00000114626	0.757263	1.27e-26	5.89e-25	ABTB1	protein_coding	3	127672935	127680920	1
ENSG00000185567	0.648364	1.32e-26	6.1e-25	AHNAK2	protein_coding	14	104937244	104978357	-1
ENSG00000167136	0.633351	1.52e-26	6.99e-25	ENDOG	protein_coding	9	128818474	128822677	1
ENSG00000095066	0.952229	2.03e-26	9.32e-25	HOOK2	protein_coding	19	12763003	12872740	-1
ENSG00000177971	0.646175	2.18e-26	9.97e-25	IMP3	protein_coding	15	75639085	75648706	-1
ENSG00000137310	0.625778	3.26e-26	1.48e-24	TCF19	protein_coding	6	31158542	31167159	1
ENSG00000167536	0.910379	3.87e-26	1.75e-24	DHRS13	protein_coding	17	28897781	28903071	-1
ENSG00000127329	1.01527	3.91e-26	1.77e-24	PTPRB	protein_coding	12	70515866	70637440	-1
ENSG00000164211	0.627492	4.7e-26	2.12e-24	STARD4	protein_coding	5	111496033	111512590	-1
ENSG00000099849	0.930252	4.76e-26	2.14e-24	RASSF7	protein_coding	11	560404	564021	1
ENSG00000183775	1.2336	5.02e-26	2.24e-24	KCTD16	protein_coding	5	144170832	144485686	1
ENSG00000144063	1.76699	6.3e-26	2.81e-24	MALL	protein_coding	2	110083870	110116566	-1
ENSG00000163689	1.64395	1.31e-25	5.8e-24	C3orf67	protein_coding	3	58717365	59050084	-1
ENSG00000157240	0.795289	1.7e-25	7.47e-24	FZD1	protein_coding	7	91264364	91271326	1
ENSG00000244165	1.18704	3.48e-25	1.51e-23	P2RY11	protein_coding	19	10111538	10115372	1
ENSG00000070444	0.619493	3.55e-25	1.54e-23	MNT	protein_coding	17	2384060	2401118	-1
ENSG00000060656	0.832994	5.3e-25	2.28e-23	PTPRU	protein_coding	1	29236516	29326813	1
ENSG00000156273	0.746612	9.05e-25	3.87e-23	BACH1	protein_coding	21	29194071	29630751	1
ENSG00000184441	2.70185	9.39e-25	4e-23	AP001062.1	antisense	21	44331234	44335851	1
ENSG00000100311	2.37488	1.12e-24	4.77e-23	PDGFB	protein_coding	22	39223359	39244751	-1
ENSG00000151151	0.8377	1.43e-24	5.99e-23	IPMK	protein_coding	10	58191517	58267934	-1
ENSG00000225205	2.69956	1.45e-24	6.09e-23	AC078883.1	antisense	2	172480840	172556596	-1
ENSG00000162415	1.12282	1.71e-24	7.16e-23	ZSWIM5	protein_coding	1	45016399	45306209	-1
ENSG00000052802	0.672527	2.26e-24	9.39e-23	MSMO1	protein_coding	4	165327623	165343160	1
ENSG00000173890	2.47753	2.3e-24	9.51e-23	GPR160	protein_coding	3	170037929	170085403	1
ENSG00000160183	1.2896	4.48e-24	1.84e-22	TMPRSS3	protein_coding	21	42371837	42396846	-1
ENSG00000100290	4.56047	5.39e-24	2.21e-22	BIK	protein_coding	22	43110748	43129712	1
ENSG00000124116	3.92163	7.21e-24	2.95e-22	WFDC3	protein_coding	20	45747944	45791932	-1
ENSG00000071575	1.54358	7.26e-24	2.96e-22	TRIB2	protein_coding	2	12716889	12742734	1
ENSG00000131069	0.819662	9.92e-24	4.01e-22	ACSS2	protein_coding	20	34872146	34927962	1
ENSG00000134954	0.76527	1.78e-23	7.17e-22	ETS1	protein_coding	11	128458761	128587558	-1
ENSG00000063854	0.73415	3.91e-23	1.54e-21	HAGH	protein_coding	16	1795620	1827194	-1
ENSG00000116883	2.84049	3.96e-23	1.56e-21	AL591845.1	antisense	1	36323734	36329221	1
ENSG00000238266	0.691919	4.88e-23	1.9e-21	LINC00707	lincRNA	10	6779549	6879450	1
ENSG00000228451	2.33207	6.55e-23	2.53e-21	SDAD1P1	transcribed_processed_pseudogene	8	26375913	26382953	-1
ENSG00000135631	0.648092	8.76e-23	3.37e-21	RAB11FIP5	protein_coding	2	73073382	73156721	-1
ENSG00000113369	0.624322	9.2e-23	3.54e-21	ARRDC3	protein_coding	5	91368724	91383359	-1
ENSG00000204219	1.38708	1.31e-22	5e-21	TCEA3	protein_coding	1	23381061	23424740	-1
ENSG00000146205	1.80155	1.58e-22	5.99e-21	ANO7	protein_coding	2	241188509	241225377	1
ENSG00000124104	1.00101	1.73e-22	6.57e-21	SNX21	protein_coding	20	45833810	45843275	1
ENSG00000167723	2.57385	2.17e-22	8.16e-21	TRPV3	protein_coding	17	3510502	3557995	-1
ENSG00000176678	0.817247	4.27e-22	1.59e-20	FOXL1	protein_coding	16	86576368	86582160	1
ENSG00000133488	2.36182	4.83e-22	1.79e-20	SEC14L4	protein_coding	22	30488913	30505711	-1
ENSG00000103528	1.23254	8.09e-22	2.98e-20	SYT17	protein_coding	16	19167971	19268334	1
ENSG00000154429	0.788871	9.03e-22	3.32e-20	CCSAP	protein_coding	1	229321005	229343294	-1
ENSG00000139211	0.622793	1.03e-21	3.78e-20	AMIGO2	protein_coding	12	47075707	47079951	-1
ENSG00000167397	0.876618	1.12e-21	4.09e-20	VKORC1	protein_coding	16	31090842	31095980	-1
ENSG00000231890	2.08428	1.3e-21	4.71e-20	DARS-AS1	antisense	2	135985176	136022593	1
ENSG00000141622	0.711752	1.7e-21	6.16e-20	RNF165	protein_coding	18	46326809	46463140	1
ENSG00000025039	2.28466	2.06e-21	7.42e-20	RRAGD	protein_coding	6	89364636	89412270	-1
ENSG00000089775	0.946864	2.07e-21	7.42e-20	ZBTB25	protein_coding	14	64449106	64505213	-1
ENSG00000165195	0.67453	2.91e-21	1.04e-19	PIGA	protein_coding	X	15319451	15335580	-1
ENSG00000188910	0.981293	3.36e-21	1.2e-19	GJB3	protein_coding	1	34781189	34786369	1
ENSG00000181104	0.598165	5.17e-21	1.84e-19	F2R	protein_coding	5	76716043	76735781	1
ENSG00000080819	0.721188	6.74e-21	2.39e-19	CPOX	protein_coding	3	98579446	98593723	-1
ENSG00000076641	1.78873	1.21e-20	4.28e-19	PAG1	protein_coding	8	80967810	81112068	-1
ENSG00000167702	0.75586	1.46e-20	5.13e-19	KIFC2	protein_coding	8	144466043	144474202	1
ENSG00000126870	0.767568	1.53e-20	5.38e-19	WDR60	protein_coding	7	158856578	158956747	1
ENSG00000101040	0.772275	1.8e-20	6.31e-19	ZMYND8	protein_coding	20	47209214	47356889	-1
ENSG00000067840	2.22874	2.1e-20	7.29e-19	PDZD4	protein_coding	X	153802166	153830565	-1
ENSG00000240849	0.602411	2.28e-20	7.91e-19	TMEM189	protein_coding	20	50118254	50153734	-1
ENSG00000166046	1.19001	2.39e-20	8.27e-19	TCP11L2	protein_coding	12	106301929	106347015	1
ENSG00000101457	0.698059	2.93e-20	1.01e-18	DNTTIP1	protein_coding	20	45791937	45811427	1
ENSG00000020577	0.786657	3.66e-20	1.26e-18	SAMD4A	protein_coding	14	54567097	54793315	1
ENSG00000138623	1.66353	3.99e-20	1.37e-18	SEMA7A	protein_coding	15	74409289	74433958	-1
ENSG00000146858	1.03643	4.32e-20	1.48e-18	ZC3HAV1L	protein_coding	7	139025706	139036029	-1
ENSG00000101670	1.31916	5.2e-20	1.78e-18	LIPG	protein_coding	18	49560699	49599182	1
ENSG00000119630	3.67566	6.84e-20	2.32e-18	PGF	protein_coding	14	74941834	74955784	-1
ENSG00000054967	0.695335	9.65e-20	3.26e-18	RELT	protein_coding	11	73376264	73397474	1
ENSG00000212747	0.641431	1.03e-19	3.45e-18	RTL8B	protein_coding	X	135020504	135022529	-1
ENSG00000013441	0.672122	1.67e-19	5.59e-18	CLK1	protein_coding	2	200853009	200864744	-1
ENSG00000106799	0.629643	1.99e-19	6.62e-18	TGFBR1	protein_coding	9	99104038	99154192	1
ENSG00000172183	1.46744	1.99e-19	6.63e-18	ISG20	protein_coding	15	88636153	88656483	1
ENSG00000078043	0.652679	3.67e-19	1.21e-17	PIAS2	protein_coding	18	46803224	46920160	-1
ENSG00000212864	1.35616	3.98e-19	1.3e-17	RNF208	protein_coding	9	137220247	137221581	-1
ENSG00000172164	1.26646	4.51e-19	1.47e-17	SNTB1	protein_coding	8	120535745	120813273	-1
ENSG00000163297	0.912202	5.53e-19	1.8e-17	ANTXR2	protein_coding	4	79901149	80125454	-1
ENSG00000182749	0.751121	5.84e-19	1.89e-17	PAQR7	protein_coding	1	25861210	25871253	-1
ENSG00000132470	1.09314	6.79e-19	2.19e-17	ITGB4	protein_coding	17	75721328	75757818	1
ENSG00000037637	0.615052	6.92e-19	2.22e-17	FBXO42	protein_coding	1	16246839	16352454	-1
ENSG00000172366	0.617184	7.1e-19	2.28e-17	MCRIP2	protein_coding	16	636817	648474	1
ENSG00000163328	1.22349	9.14e-19	2.91e-17	GPR155	protein_coding	2	174431571	174487094	-1
ENSG00000235823	0.814964	1.1e-18	3.51e-17	OLMALINC	lincRNA	10	100373513	100454043	1
ENSG00000151883	0.635901	1.2e-18	3.83e-17	PARP8	protein_coding	5	50665899	50846522	1
ENSG00000237686	1.303	1.71e-18	5.37e-17	AL109615.3	antisense	6	43995723	44074652	-1
ENSG00000273604	0.836038	2.08e-18	6.51e-17	EPOP	protein_coding	17	38671703	38675421	-1
ENSG00000109103	0.861592	2.56e-18	7.95e-17	UNC119	protein_coding	17	28546707	28552668	-1
ENSG00000177943	0.90264	2.87e-18	8.85e-17	MAMDC4	protein_coding	9	136850943	136860799	1
ENSG00000102878	1.27562	2.88e-18	8.87e-17	HSF4	protein_coding	16	67164681	67169945	1
ENSG00000138439	0.663027	3.05e-18	9.39e-17	FAM117B	protein_coding	2	202635188	202769757	1
ENSG00000159884	0.69498	3.67e-18	1.12e-16	CCDC107	protein_coding	9	35658290	35661511	1
ENSG00000167508	0.635493	3.81e-18	1.16e-16	MVD	protein_coding	16	88651935	88663161	-1
ENSG00000272870	1.56304	5.62e-18	1.71e-16	AC097534.2	antisense	4	173363780	173370446	-1
ENSG00000101213	1.05256	6.03e-18	1.83e-16	PTK6	protein_coding	20	63528001	63537370	-1
ENSG00000206530	0.97728	6.61e-18	2e-16	CFAP44	protein_coding	3	113286947	113441610	-1
ENSG00000106538	0.95648	6.91e-18	2.09e-16	RARRES2	protein_coding	7	150338317	150341674	-1
ENSG00000088812	0.623516	7e-18	2.11e-16	ATRN	protein_coding	20	3471040	3651122	1
ENSG00000169992	0.592384	7.74e-18	2.32e-16	NLGN2	protein_coding	17	7404874	7419860	1
ENSG00000176720	0.741457	8.06e-18	2.41e-16	BOK	protein_coding	2	241551424	241574138	1
ENSG00000124145	1.09136	1.18e-17	3.5e-16	SDC4	protein_coding	20	45325288	45348424	-1
ENSG00000139289	0.657745	1.23e-17	3.66e-16	PHLDA1	protein_coding	12	76025447	76033932	-1
ENSG00000066248	0.74015	1.31e-17	3.88e-16	NGEF	protein_coding	2	232878686	233013272	-1
ENSG00000175105	0.796015	1.36e-17	4.02e-16	ZNF654	protein_coding	3	88059274	88144665	1
ENSG00000177606	1.20974	1.42e-17	4.19e-16	JUN	protein_coding	1	58780788	58784327	-1
ENSG00000170949	0.814293	1.62e-17	4.77e-16	ZNF160	protein_coding	19	53066606	53103436	-1
ENSG00000223509	1.53855	1.86e-17	5.45e-16	AC135983.2	transcribed_processed_pseudogene	15	32519848	32536926	-1
ENSG00000131668	1.70944	2.36e-17	6.87e-16	BARX1	protein_coding	9	93951622	93955372	-1
ENSG00000143554	0.874005	2.49e-17	7.24e-16	SLC27A3	protein_coding	1	153774354	153780157	1
ENSG00000186792	0.825988	2.66e-17	7.69e-16	HYAL3	protein_coding	3	50292831	50299468	-1
ENSG00000006459	1.16178	2.68e-17	7.73e-16	KDM7A	protein_coding	7	140084746	140177035	-1
ENSG00000146678	2.03875	3.99e-17	1.13e-15	IGFBP1	protein_coding	7	45888357	45893668	1
ENSG00000230795	2.25718	4.33e-17	1.22e-15	HLA-K	unprocessed_pseudogene	6	29926459	29929232	1
ENSG00000099840	2.11001	4.55e-17	1.28e-15	IZUMO4	protein_coding	19	2096429	2099593	1
ENSG00000166920	4.5565	6.17e-17	1.73e-15	C15orf48	protein_coding	15	45430529	45448761	1
ENSG00000127129	2.6494	6.96e-17	1.93e-15	EDN2	protein_coding	1	41478775	41484673	-1
ENSG00000279806	1.08525	9.17e-17	2.51e-15	AC018629.1	TEC	17	40473554	40475289	-1
ENSG00000155760	0.950247	1.07e-16	2.93e-15	FZD7	protein_coding	2	202034587	202038445	1
ENSG00000127585	0.760265	1.28e-16	3.48e-15	FBXL16	protein_coding	16	692498	705829	-1
ENSG00000275074	1.2835	1.76e-16	4.72e-15	NUDT18	protein_coding	8	22106872	22109419	-1
ENSG00000118707	0.735932	2.03e-16	5.43e-15	TGIF2	protein_coding	20	36573488	36593950	1
ENSG00000188042	0.916017	2.5e-16	6.68e-15	ARL4C	protein_coding	2	234493041	234497053	-1
ENSG00000232434	0.860156	3.61e-16	9.54e-15	AJM1	protein_coding	9	136844415	136848801	1
ENSG00000138166	0.872568	4.17e-16	1.1e-14	DUSP5	protein_coding	10	110497838	110511544	1
ENSG00000186314	0.810957	4.97e-16	1.3e-14	PRELID2	protein_coding	5	145471799	145835369	-1
ENSG00000181350	2.17948	5.02e-16	1.31e-14	LRRC75A	protein_coding	17	16441577	16492153	-1
ENSG00000171303	1.07628	5.03e-16	1.31e-14	KCNK3	protein_coding	2	26692690	26733420	1
ENSG00000166886	0.745108	5.58e-16	1.44e-14	NAB2	protein_coding	12	57088894	57095476	1
ENSG00000142583	1.9542	6.03e-16	1.55e-14	SLC2A5	protein_coding	1	9035107	9088478	-1
ENSG00000128578	0.754183	6.02e-16	1.55e-14	STRIP2	protein_coding	7	129434433	129488399	1
ENSG00000133138	0.869992	6.65e-16	1.71e-14	TBC1D8B	protein_coding	X	106802680	106876145	1
ENSG00000167619	2.72954	8.99e-16	2.29e-14	TMEM145	protein_coding	19	42313325	42325062	1
ENSG00000197557	1.09726	9.51e-16	2.42e-14	TTC30A	protein_coding	2	177612992	177618966	-1
ENSG00000279689	2.15268	9.83e-16	2.49e-14	AC022400.8	TEC	10	73769264	73772862	-1
ENSG00000070371	0.826759	1.25e-15	3.16e-14	CLTCL1	protein_coding	22	19179473	19291716	-1
ENSG00000154102	1.40171	1.31e-15	3.31e-14	C16orf74	protein_coding	16	85690084	85751129	-1
ENSG00000227051	1.082	1.56e-15	3.9e-14	C14orf132	protein_coding	14	96039324	96093889	1
ENSG00000145780	0.607092	1.82e-15	4.53e-14	FEM1C	protein_coding	5	115520908	115544894	-1
ENSG00000160471	2.52094	1.87e-15	4.64e-14	COX6B2	protein_coding	19	55349306	55354814	-1
ENSG00000180815	2.47367	1.89e-15	4.68e-14	MAP3K15	protein_coding	X	19360056	19515261	-1
ENSG00000183421	0.662801	2.06e-15	5.09e-14	RIPK4	protein_coding	21	41739369	41767106	-1
ENSG00000205129	3.88787	2.41e-15	5.92e-14	C4orf47	protein_coding	4	185426249	185449826	1
ENSG00000214049	2.67705	2.85e-15	6.9e-14	UCA1	lincRNA	19	15828206	15836326	1
ENSG00000170961	0.890478	3.29e-15	7.94e-14	HAS2	protein_coding	8	121612116	121641390	-1
ENSG00000100314	2.91469	3.43e-15	8.26e-14	CABP7	protein_coding	22	29720084	29731839	1
ENSG00000131759	0.620665	3.51e-15	8.45e-14	RARA	protein_coding	17	40309192	40357643	1
ENSG00000130513	1.21804	3.81e-15	9.15e-14	GDF15	protein_coding	19	18374731	18389176	1
ENSG00000230479	2.10329	4.36e-15	1.05e-13	AP000695.1	antisense	21	36430360	36481070	1
ENSG00000151729	0.673851	4.61e-15	1.11e-13	SLC25A4	protein_coding	4	185143241	185150382	1
ENSG00000189410	0.968781	5.07e-15	1.21e-13	SH2D5	protein_coding	1	20719732	20732837	-1
ENSG00000150630	0.805181	6.56e-15	1.56e-13	VEGFC	protein_coding	4	176683538	176792727	-1
ENSG00000164603	0.843581	1.11e-14	2.61e-13	BMT2	protein_coding	7	112819147	112939916	-1
ENSG00000130517	0.584788	1.14e-14	2.66e-13	PGPEP1	protein_coding	19	18340587	18369950	1
ENSG00000164379	0.649504	1.37e-14	3.17e-13	FOXQ1	protein_coding	6	1312440	1314748	1
ENSG00000237330	3.81351	1.52e-14	3.53e-13	RNF223	protein_coding	1	1070966	1074307	-1
ENSG00000164683	1.24315	1.52e-14	3.53e-13	HEY1	protein_coding	8	79764010	79767863	-1
ENSG00000119899	0.590011	1.59e-14	3.68e-13	SLC17A5	protein_coding	6	73593379	73654155	-1
ENSG00000081277	1.01439	1.74e-14	4.01e-13	PKP1	protein_coding	1	201283452	201332993	1
ENSG00000182685	1.13156	2.25e-14	5.17e-13	BRICD5	protein_coding	16	2209253	2211950	-1
ENSG00000143630	0.890817	2.33e-14	5.33e-13	HCN3	protein_coding	1	155277583	155289848	1
ENSG00000156113	2.26921	2.81e-14	6.41e-13	KCNMA1	protein_coding	10	76869601	77638369	-1
ENSG00000141655	1.24483	4.45e-14	9.98e-13	TNFRSF11A	protein_coding	18	62325287	62391292	1
ENSG00000148798	0.580136	4.92e-14	1.1e-12	INA	protein_coding	10	103277163	103290351	1
ENSG00000173376	2.86525	4.97e-14	1.11e-12	NDNF	protein_coding	4	121035613	121073021	-1
ENSG00000184497	2.14958	5.05e-14	1.13e-12	TMEM255B	protein_coding	13	113759240	113816995	1
ENSG00000147394	0.807244	6.19e-14	1.37e-12	ZNF185	protein_coding	X	152914442	152973480	1
ENSG00000144821	1.86547	8.28e-14	1.82e-12	MYH15	protein_coding	3	108380369	108529322	-1
ENSG00000170425	0.745655	9.91e-14	2.16e-12	ADORA2B	protein_coding	17	15944917	15975746	1
ENSG00000011422	0.582327	1.01e-13	2.2e-12	PLAUR	protein_coding	19	43646095	43670547	-1
ENSG00000100100	1.54174	1.11e-13	2.41e-12	PIK3IP1	protein_coding	22	31281593	31292534	-1
ENSG00000275216	1.04508	1.11e-13	2.41e-12	AL161431.1	lincRNA	13	109269634	109278512	1
ENSG00000265190	0.82715	1.17e-13	2.53e-12	ANXA8	protein_coding	10	47460162	47484158	-1
ENSG00000159167	6.23853	1.25e-13	2.7e-12	STC1	protein_coding	8	23841915	23854807	-1
ENSG00000123095	1.64242	1.91e-13	4.02e-12	BHLHE41	protein_coding	12	26120026	26125127	-1
ENSG00000166171	0.629437	1.97e-13	4.15e-12	DPCD	protein_coding	10	101570560	101609668	1
ENSG00000243927	0.718831	1.99e-13	4.19e-12	MRPS6	protein_coding	21	34073224	34143034	1
ENSG00000227467	0.919407	2.08e-13	4.37e-12	LINC01537	lincRNA	11	72570660	72573229	1
ENSG00000167535	0.742848	2.13e-13	4.47e-12	CACNB3	protein_coding	12	48813794	48828941	1
ENSG00000103067	0.659232	2.15e-13	4.49e-12	ESRP2	protein_coding	16	68229111	68238102	-1
ENSG00000135318	1.19051	2.25e-13	4.69e-12	NT5E	protein_coding	6	85449584	85495791	1
ENSG00000078804	0.755318	3.44e-13	7.01e-12	TP53INP2	protein_coding	20	34704290	34713439	1
ENSG00000256940	0.852158	3.7e-13	7.52e-12	AP001453.2	antisense	11	64245964	64248217	1
ENSG00000196730	1.27396	4.09e-13	8.27e-12	DAPK1	protein_coding	9	87497228	87708633	1
ENSG00000248323	0.838966	5.97e-13	1.19e-11	LUCAT1	antisense	5	91054834	91314547	-1
ENSG00000133874	1.43157	6.4e-13	1.28e-11	RNF122	protein_coding	8	33547755	33567125	-1
ENSG00000188559	0.589197	6.83e-13	1.36e-11	RALGAPA2	protein_coding	20	20389552	20712488	-1
ENSG00000158373	0.854208	9.2e-13	1.81e-11	HIST1H2BD	protein_coding	6	26158146	26171349	1
ENSG00000173530	0.626863	1.08e-12	2.12e-11	TNFRSF10D	protein_coding	8	23135588	23164030	-1
ENSG00000233818	1.97479	1.17e-12	2.28e-11	AP000695.2	antisense	21	36445731	36532408	1
ENSG00000204103	1.35277	1.21e-12	2.37e-11	MAFB	protein_coding	20	40685848	40689240	-1
ENSG00000157873	1.22944	1.26e-12	2.47e-11	TNFRSF14	protein_coding	1	2555639	2565382	1
ENSG00000196123	0.607705	1.33e-12	2.59e-11	KIAA0895L	protein_coding	16	67175602	67184040	-1
ENSG00000237149	0.970415	1.76e-12	3.37e-11	ZNF503-AS2	antisense	10	75401519	75408982	1
ENSG00000187908	0.855695	2.23e-12	4.22e-11	DMBT1	protein_coding	10	122560665	122643736	1
ENSG00000167653	0.776917	2.37e-12	4.47e-11	PSCA	protein_coding	8	142670308	142682724	1
ENSG00000226415	1.28028	2.39e-12	4.5e-11	TPI1P1	processed_pseudogene	1	76699789	76700538	1
ENSG00000106617	0.808503	2.39e-12	4.5e-11	PRKAG2	protein_coding	7	151556111	151877125	-1
ENSG00000131773	0.594726	2.65e-12	4.98e-11	KHDRBS3	protein_coding	8	135457457	135656722	1
ENSG00000164171	0.991658	3.65e-12	6.8e-11	ITGA2	protein_coding	5	52989326	53094779	1
ENSG00000095397	0.581224	3.73e-12	6.94e-11	WHRN	protein_coding	9	114402080	114505450	-1
ENSG00000205485	0.6197	3.88e-12	7.22e-11	AC004980.1	transcribed_unprocessed_pseudogene	7	76549360	76627982	1
ENSG00000100593	5.30121	3.92e-12	7.28e-11	ISM2	protein_coding	14	77474394	77498850	-1
ENSG00000279365	2.82402	4.68e-12	8.61e-11	AP000695.3	TEC	21	36485867	36487760	1
ENSG00000124466	1.26605	4.86e-12	8.92e-11	LYPD3	protein_coding	19	43460787	43465660	-1
ENSG00000135617	0.614639	5.62e-12	1.03e-10	PRADC1	protein_coding	2	73228006	73233238	-1
ENSG00000183780	0.59106	6.42e-12	1.17e-10	SLC35F3	protein_coding	1	233904933	234324516	1
ENSG00000075826	1.23317	6.78e-12	1.24e-10	SEC31B	protein_coding	10	100486642	100519864	-1
ENSG00000135643	1.09766	6.88e-12	1.25e-10	KCNMB4	protein_coding	12	70366276	70434292	1
ENSG00000105204	0.676221	9.61e-12	1.73e-10	DYRK1B	protein_coding	19	39825350	39834201	-1
ENSG00000262831	1.18275	1.15e-11	2.05e-10	AC145207.3	antisense	17	81843165	81843958	1
ENSG00000263535	1.66146	1.24e-11	2.21e-10	AK4P1	processed_pseudogene	17	31345519	31346190	1
ENSG00000177453	2.76341	1.29e-11	2.3e-10	NIM1K	protein_coding	5	43192071	43280850	1
ENSG00000099999	0.670827	1.74e-11	3.06e-10	RNF215	protein_coding	22	30368811	30421771	-1
ENSG00000059769	0.669292	1.87e-11	3.28e-10	DNAJC25	protein_coding	9	111631352	111654351	1
ENSG00000139266	0.853842	1.9e-11	3.32e-10	2009-03-01	protein_coding	12	57755098	57760407	1
ENSG00000087903	0.738577	1.93e-11	3.37e-10	RFX2	protein_coding	19	5993164	6199572	-1
ENSG00000128805	0.777444	1.94e-11	3.38e-10	ARHGAP22	protein_coding	10	48446034	48656265	-1
ENSG00000175592	0.590654	2.35e-11	4.04e-10	FOSL1	protein_coding	11	65892049	65900573	-1
ENSG00000155111	0.583357	2.49e-11	4.26e-10	CDK19	protein_coding	6	110609978	110815958	-1
ENSG00000262454	0.63789	3.33e-11	5.63e-10	MIR193BHG	lincRNA	16	14301389	14331067	1
ENSG00000167642	0.861521	3.71e-11	6.26e-10	SPINT2	protein_coding	19	38244035	38292614	1
ENSG00000204128	8.79231	3.88e-11	6.53e-10	C2orf72	protein_coding	2	231037490	231049719	1
ENSG00000188290	0.595834	5.16e-11	8.53e-10	HES4	protein_coding	1	998962	1000172	-1
ENSG00000168528	0.587796	5.77e-11	9.46e-10	SERINC2	protein_coding	1	31409565	31434680	1
ENSG00000172638	1.93109	5.88e-11	9.63e-10	EFEMP2	protein_coding	11	65866441	65873592	-1
ENSG00000125657	0.849424	9.25e-11	1.48e-09	TNFSF9	protein_coding	19	6530999	6535928	1
ENSG00000023445	0.71635	1.14e-10	1.81e-09	BIRC3	protein_coding	11	102317450	102339403	1
ENSG00000214110	1.12726	1.16e-10	1.84e-09	LDHAP4	processed_pseudogene	9	14921337	14922334	-1
ENSG00000094841	0.650158	1.3e-10	2.04e-09	UPRT	protein_coding	X	75274085	75304600	1
ENSG00000130363	0.694484	1.44e-10	2.26e-09	RSPH3	protein_coding	6	158972871	159000187	-1
ENSG00000188112	0.816084	1.74e-10	2.71e-09	C6orf132	protein_coding	6	42101118	42142619	-1
ENSG00000072818	1.98006	1.86e-10	2.89e-09	ACAP1	protein_coding	17	7336529	7351478	1
ENSG00000230432	7.3103	1.97e-10	3.04e-09	AC114803.1	antisense	2	219299002	219304130	1
ENSG00000228594	0.585419	1.99e-10	3.06e-09	FNDC10	protein_coding	1	1598012	1600096	-1
ENSG00000198743	1.24279	2.59e-10	3.94e-09	SLC5A3	protein_coding	21	34073570	34106262	1
ENSG00000115657	0.986233	2.75e-10	4.15e-09	ABCB6	protein_coding	2	219209766	219219017	-1
ENSG00000279092	2.12155	2.81e-10	4.24e-09	AC025678.3	TEC	15	34415450	34420273	-1
ENSG00000123384	1.18231	3.03e-10	4.56e-09	LRP1	protein_coding	12	57128493	57213351	1
ENSG00000143507	0.68461	3.06e-10	4.6e-09	DUSP10	protein_coding	1	221701424	221742176	-1
ENSG00000147036	0.778321	3.6e-10	5.41e-09	LANCL3	protein_coding	X	37571569	37684463	1
ENSG00000170412	1.09722	3.85e-10	5.73e-09	GPRC5C	protein_coding	17	74424851	74451653	1
ENSG00000164638	2.08149	4.18e-10	6.19e-09	SLC29A4	protein_coding	7	5274369	5306870	1
ENSG00000163131	0.87852	4.57e-10	6.76e-09	CTSS	protein_coding	1	150730196	150765957	-1
ENSG00000182795	1.69128	4.9e-10	7.23e-09	C1orf116	protein_coding	1	207018521	207032756	-1
ENSG00000126878	0.62836	4.94e-10	7.27e-09	AIF1L	protein_coding	9	131096476	131123152	1
ENSG00000130810	0.759651	7.56e-10	1.09e-08	PPAN	protein_coding	19	10106289	10111634	1
ENSG00000146555	0.886584	7.79e-10	1.12e-08	SDK1	protein_coding	7	3301448	4269000	1
ENSG00000118503	0.584099	7.82e-10	1.12e-08	TNFAIP3	protein_coding	6	137867188	137883312	1
ENSG00000105048	1.03317	9.06e-10	1.29e-08	TNNT1	protein_coding	19	55132794	55149354	-1
ENSG00000057294	0.873321	9.82e-10	1.39e-08	PKP2	protein_coding	12	32790745	32896840	-1
ENSG00000113108	0.75924	1.01e-09	1.43e-08	APBB3	protein_coding	5	140558268	140564781	-1
ENSG00000130590	0.63324	1.05e-09	1.49e-08	SAMD10	protein_coding	20	63974113	63980008	-1
ENSG00000104368	0.994419	1.09e-09	1.54e-08	PLAT	protein_coding	8	42175233	42207724	-1
ENSG00000203780	1.63225	1.24e-09	1.75e-08	FANK1	protein_coding	10	125896539	126009592	1
ENSG00000131187	1.05346	1.25e-09	1.75e-08	F12	protein_coding	5	177402140	177409576	-1
ENSG00000172663	0.676393	1.39e-09	1.94e-08	TMEM134	protein_coding	11	67461710	67469272	-1
ENSG00000156711	1.3372	1.41e-09	1.97e-08	MAPK13	protein_coding	6	36127809	36144524	1
ENSG00000130751	2.31294	1.51e-09	2.09e-08	NPAS1	protein_coding	19	47019820	47045775	1
ENSG00000107338	0.623956	1.51e-09	2.09e-08	SHB	protein_coding	9	37919134	38069211	-1
ENSG00000137462	2.51419	1.93e-09	2.64e-08	TLR2	protein_coding	4	153684070	153705702	1
ENSG00000095752	0.738632	2.12e-09	2.89e-08	IL11	protein_coding	19	55364389	55370463	-1
ENSG00000251322	0.844048	2.26e-09	3.07e-08	SHANK3	protein_coding	22	50674415	50733298	1
ENSG00000173237	0.906346	2.5e-09	3.37e-08	C11orf86	protein_coding	11	66975277	66977004	1
ENSG00000137880	0.619698	2.72e-09	3.65e-08	GCHFR	protein_coding	15	40764020	40767710	1
ENSG00000273230	0.940737	2.81e-09	3.77e-08	AC102953.2	lincRNA	7	1464497	1467522	-1
ENSG00000270055	1.23497	3e-09	4.01e-08	AC127502.2	sense_intronic	15	30487963	30490313	1
ENSG00000172061	1.04223	3.44e-09	4.54e-08	LRRC15	protein_coding	3	194355247	194369743	-1
ENSG00000242114	0.990474	3.83e-09	5.03e-08	MTFP1	protein_coding	22	30425530	30429053	1
ENSG00000064205	0.753784	4.6e-09	6e-08	WISP2	protein_coding	20	44714844	44728509	1
ENSG00000162241	0.646067	5.85e-09	7.55e-08	SLC25A45	protein_coding	11	65375192	65383701	-1
ENSG00000239911	1.68009	6.27e-09	8.03e-08	PRKAG2-AS1	antisense	7	151877042	151879223	1
ENSG00000128683	1.29663	7.18e-09	9.11e-08	GAD1	protein_coding	2	170813213	170861151	1
ENSG00000103184	7.81038	7.35e-09	9.33e-08	SEC14L5	protein_coding	16	4958317	5019158	1
ENSG00000256633	1.15023	1.04e-08	1.3e-07	AP005019.1	antisense	11	72584572	72587979	1
ENSG00000103089	1.39791	1.07e-08	1.33e-07	FA2H	protein_coding	16	74712955	74774831	-1
ENSG00000204531	1.5075	1.08e-08	1.35e-07	POU5F1	protein_coding	6	31164337	31180731	-1
ENSG00000116574	0.897926	1.1e-08	1.37e-07	RHOU	protein_coding	1	228735077	228746669	1
ENSG00000231412	1.80223	1.15e-08	1.43e-07	AC005392.2	lincRNA	19	43329295	43331430	-1
ENSG00000243742	2.31602	1.39e-08	1.71e-07	RPLP0P2	transcribed_processed_pseudogene	11	61615036	61639449	1
ENSG00000280407	1.00124	1.51e-08	1.85e-07	AC132872.4	TEC	17	82249067	82251844	1
ENSG00000054356	6.55248	1.54e-08	1.89e-07	PTPRN	protein_coding	2	219289623	219309648	-1
ENSG00000101955	0.927306	1.71e-08	2.08e-07	SRPX	protein_coding	X	38149336	38220924	-1
ENSG00000168333	2.92899	1.79e-08	2.16e-07	PPDPFL	protein_coding	8	49054311	49076090	1
ENSG00000234880	2.43845	1.79e-08	2.16e-07	LINC00163	lincRNA	21	44989864	44994086	-1
ENSG00000228526	0.776576	1.82e-08	2.2e-07	MIR34AHG	lincRNA	1	9148011	9198906	-1
ENSG00000274904	1.90448	1.88e-08	2.27e-07	AC093512.1	antisense	16	30064306	30064825	-1
ENSG00000262160	0.980621	1.98e-08	2.38e-07	AC020978.5	antisense	16	68225969	68229145	-1
ENSG00000174428	0.775645	2.09e-08	2.5e-07	GTF2IRD2B	protein_coding	7	75092573	75149817	1
ENSG00000226510	7.59891	2.18e-08	2.61e-07	UPK1A-AS1	antisense	19	35667948	35673291	-1
ENSG00000261051	1.86577	2.58e-08	3.05e-07	AC107021.2	sense_overlapping	3	146059585	146061679	-1
ENSG00000204528	1.88712	2.86e-08	3.37e-07	PSORS1C3	sense_intronic	6	31173735	31177899	-1
ENSG00000176383	2.1139	3e-08	3.53e-07	B3GNT4	protein_coding	12	122203543	122208952	1
ENSG00000179403	2.48929	3.19e-08	3.73e-07	VWA1	protein_coding	1	1434861	1442882	1
ENSG00000261706	1.16488	3.39e-08	3.96e-07	LINC00165	lincRNA	21	44994362	44995185	-1
ENSG00000197358	2.97333	3.57e-08	4.14e-07	BNIP3P1	transcribed_processed_pseudogene	14	28264390	28265974	1
ENSG00000253837	2.93175	3.8e-08	4.39e-07	AC090197.1	processed_transcript	8	23336171	23366125	1
ENSG00000130540	0.68257	3.89e-08	4.48e-07	SULT4A1	protein_coding	22	43824509	43862503	-1
ENSG00000111700	0.847844	4.23e-08	4.83e-07	SLCO1B3	protein_coding	12	20810702	20916911	1
ENSG00000129355	0.79366	4.45e-08	5.05e-07	CDKN2D	protein_coding	19	10566462	10569059	-1
ENSG00000214274	1.43082	4.67e-08	5.28e-07	ANG	protein_coding	14	20684177	20698971	1
ENSG00000143153	0.725639	4.84e-08	5.47e-07	ATP1B1	protein_coding	1	169105697	169132722	1
ENSG00000226067	0.591673	4.9e-08	5.54e-07	LINC00623	lincRNA	1	120913275	121009291	1
ENSG00000125637	1.29734	4.98e-08	5.62e-07	PSD4	protein_coding	2	113157325	113209396	1
ENSG00000176597	0.630551	5.15e-08	5.79e-07	B3GNT5	protein_coding	3	183253244	183298504	1
ENSG00000228232	0.735413	5.18e-08	5.82e-07	GAPDHP1	processed_pseudogene	X	39787132	39788136	-1
ENSG00000137507	2.62537	6.74e-08	7.45e-07	LRRC32	protein_coding	11	76657524	76670747	-1
ENSG00000228328	1.87186	7.54e-08	8.29e-07	AL158201.1	processed_pseudogene	X	68070520	68071767	-1
ENSG00000264230	0.644864	1.12e-07	1.2e-06	ANXA8L1	protein_coding	10	46375627	46391784	1
ENSG00000007264	1.95182	1.47e-07	1.55e-06	MATK	protein_coding	19	3777970	3802129	-1
ENSG00000223784	0.809173	1.59e-07	1.67e-06	LINP1	lincRNA	10	6709530	6740532	1
ENSG00000151006	1.0726	1.88e-07	1.96e-06	PRSS53	protein_coding	16	31083425	31089628	-1
ENSG00000261594	3.44242	1.94e-07	2.02e-06	TPBGL	protein_coding	11	75240905	75243697	1
ENSG00000123427	0.771482	2.12e-07	2.2e-06	EEF1AKMT3	protein_coding	12	57771492	57782541	1
ENSG00000215788	0.800625	2.23e-07	2.3e-06	TNFRSF25	protein_coding	1	6460786	6466195	-1
ENSG00000248690	1.1268	2.27e-07	2.33e-06	HAS2-AS1	processed_transcript	8	121639293	121993876	1
ENSG00000256006	1.95512	2.3e-07	2.37e-06	AC084117.1	sense_intronic	11	18405609	18406731	1
ENSG00000158406	0.842582	2.44e-07	2.51e-06	HIST1H4H	protein_coding	6	26277609	26285638	-1
ENSG00000269968	1.76915	3.27e-07	3.28e-06	AC006064.4	antisense	12	6537794	6538370	-1
ENSG00000177374	1.21635	3.29e-07	3.3e-06	HIC1	protein_coding	17	2054154	2063241	1
ENSG00000266677	2.12683	3.45e-07	3.45e-06	AC087164.1	antisense	17	18172625	18184753	-1
ENSG00000179344	3.48739	3.49e-07	3.48e-06	HLA-DQB1	protein_coding	6	32659467	32668383	-1
ENSG00000127578	2.40898	3.5e-07	3.49e-06	WFIKKN1	protein_coding	16	629239	634116	1
ENSG00000078114	0.858073	3.69e-07	3.66e-06	NEBL	protein_coding	10	20779973	21174187	-1
ENSG00000188293	1.28654	3.81e-07	3.76e-06	IGFL1	protein_coding	19	46229752	46231243	1
ENSG00000184678	0.615244	4.07e-07	4.01e-06	HIST2H2BE	protein_coding	1	149884459	149886652	-1
ENSG00000172803	1.15592	4.25e-07	4.18e-06	SNX32	protein_coding	11	65833641	65856896	1
ENSG00000127561	0.907303	4.29e-07	4.21e-06	SYNGR3	protein_coding	16	1989660	1994275	1
ENSG00000087303	0.66436	4.49e-07	4.38e-06	NID2	protein_coding	14	52004803	52069228	-1
ENSG00000261578	0.662286	4.71e-07	4.57e-06	AP003119.3	sense_overlapping	11	76800364	76804555	1
ENSG00000173391	0.716073	4.92e-07	4.76e-06	OLR1	protein_coding	12	10158301	10172138	-1
ENSG00000197019	0.627049	5.39e-07	5.17e-06	SERTAD1	protein_coding	19	40421592	40426025	-1
ENSG00000104899	0.605533	6.3e-07	5.99e-06	AMH	protein_coding	19	2249309	2252073	1
ENSG00000160271	0.638184	6.33e-07	6.01e-06	RALGDS	protein_coding	9	133097720	133149334	-1
ENSG00000254554	1.9403	6.46e-07	6.12e-06	AC080023.1	antisense	11	10302657	10303704	-1
ENSG00000185522	1.20002	7.38e-07	6.92e-06	LMNTD2	protein_coding	11	554855	560779	-1
ENSG00000196415	6.79891	7.56e-07	7.09e-06	PRTN3	protein_coding	19	840960	848175	1
ENSG00000053918	1.25334	7.76e-07	7.25e-06	KCNQ1	protein_coding	11	2444684	2849110	1
ENSG00000166821	0.628379	7.75e-07	7.25e-06	PEX11A	protein_coding	15	89677764	89690783	-1
ENSG00000079215	0.624144	7.84e-07	7.32e-06	SLC1A3	protein_coding	5	36606355	36688334	1
ENSG00000213700	2.14038	8.46e-07	7.86e-06	RPL17P50	processed_pseudogene	10	73005833	73006595	-1
ENSG00000104327	2.24857	9.14e-07	8.42e-06	CALB1	protein_coding	8	90058608	90095475	-1
ENSG00000213290	2.41648	9.19e-07	8.46e-06	PGK1P2	processed_pseudogene	19	12559571	12561105	1
ENSG00000249180	1.33489	9.9e-07	9.05e-06	AC020900.1	antisense	5	96741079	96742698	-1
ENSG00000214999	2.24377	9.92e-07	9.06e-06	AC129492.1	antisense	17	8079482	8081565	1
ENSG00000157613	0.691749	1.02e-06	9.33e-06	CREB3L1	protein_coding	11	46277661	46321422	1
ENSG00000047457	2.10282	1.06e-06	9.68e-06	CP	protein_coding	3	149162410	149222055	-1
ENSG00000125895	5.63249	1.09e-06	9.9e-06	TMEM74B	protein_coding	20	1180561	1185415	-1
ENSG00000137501	1.60107	1.16e-06	1.04e-05	SYTL2	protein_coding	11	85694224	85811159	-1
ENSG00000041515	0.916129	1.15e-06	1.04e-05	MYO16	protein_coding	13	108596152	109208007	1
ENSG00000151490	0.759094	1.17e-06	1.06e-05	PTPRO	protein_coding	12	15322397	15597399	1
ENSG00000148082	0.855138	1.18e-06	1.07e-05	SHC3	protein_coding	9	89005771	89178767	-1
ENSG00000137285	2.69927	1.48e-06	1.31e-05	TUBB2B	protein_coding	6	3224261	3231730	-1
ENSG00000223749	1.01936	1.49e-06	1.31e-05	MIR503HG	lincRNA	X	134543337	134546632	-1
ENSG00000140279	6.63351	1.59e-06	1.39e-05	DUOX2	protein_coding	15	45092650	45114344	-1
ENSG00000182379	1.16764	1.68e-06	1.47e-05	NXPH4	protein_coding	12	57216795	57226449	1
ENSG00000128965	0.628875	1.72e-06	1.5e-05	CHAC1	protein_coding	15	40952962	40956519	1
ENSG00000183929	1.82726	1.75e-06	1.52e-05	DUSP5P1	processed_pseudogene	1	228650241	228651379	1
ENSG00000004487	0.617399	1.76e-06	1.53e-05	KDM1A	protein_coding	1	23019443	23083689	1
ENSG00000199038	3.48471	1.79e-06	1.55e-05	MIR210	miRNA	11	568089	568198	-1
ENSG00000071246	0.985469	1.83e-06	1.58e-05	VASH1	protein_coding	14	76762189	76783015	1
ENSG00000246273	0.607053	1.85e-06	1.6e-05	SBF2-AS1	antisense	11	9758292	9811335	1
ENSG00000214900	1.74011	1.91e-06	1.65e-05	LINC01588	lincRNA	14	49927571	50092643	-1
ENSG00000165757	1.67697	1.93e-06	1.66e-05	JCAD	protein_coding	10	30012800	30115494	-1
ENSG00000227766	0.837048	1.99e-06	1.71e-05	AL671277.1	unprocessed_pseudogene	6	29942075	29943067	-1
ENSG00000115419	0.658629	2.04e-06	1.75e-05	GLS	protein_coding	2	190880827	190965552	1
ENSG00000106366	0.943801	2.11e-06	1.8e-05	SERPINE1	protein_coding	7	101127089	101139266	1
ENSG00000149243	0.840761	2.23e-06	1.9e-05	KLHL35	protein_coding	11	75422394	75430629	-1
ENSG00000283537	2.72078	2.34e-06	1.99e-05	AC073264.3	transcribed_unprocessed_pseudogene	7	143620943	143645675	1
ENSG00000236404	2.57567	2.38e-06	2.01e-05	VLDLR-AS1	antisense	9	2421597	2643359	-1
ENSG00000110852	2.48754	2.4e-06	2.02e-05	CLEC2B	protein_coding	12	9852984	9870136	-1
ENSG00000078900	0.673129	2.54e-06	2.14e-05	TP73	protein_coding	1	3652520	3736201	1
ENSG00000122420	1.418	2.57e-06	2.16e-05	PTGFR	protein_coding	1	78303884	78539749	1
ENSG00000259207	0.770297	2.57e-06	2.16e-05	ITGB3	protein_coding	17	47253846	47311816	1
ENSG00000205771	1.21052	2.72e-06	2.27e-05	CATSPER2P1	transcribed_unprocessed_pseudogene	15	43726918	43747094	-1
ENSG00000260401	1.15656	2.93e-06	2.43e-05	AP002761.4	sense_overlapping	11	73238975	73242335	1
ENSG00000183018	4.78945	2.95e-06	2.44e-05	SPNS2	protein_coding	17	4498838	4539035	1
ENSG00000272419	0.797272	2.99e-06	2.46e-05	LINC01145	transcribed_unprocessed_pseudogene	1	145164099	145216058	-1
ENSG00000184985	0.652072	3.23e-06	2.65e-05	SORCS2	protein_coding	4	7192538	7742836	1
ENSG00000188820	2.22409	3.34e-06	2.73e-05	CALHM6	protein_coding	6	116461370	116463779	1
ENSG00000167034	0.596117	3.88e-06	3.14e-05	NKX3-1	protein_coding	8	23678693	23682927	-1
ENSG00000235831	1.05263	3.98e-06	3.21e-05	BHLHE40-AS1	antisense	3	4896809	4979961	-1
ENSG00000130829	1.484	4.11e-06	3.31e-05	DUSP9	protein_coding	X	153642492	153651326	1
ENSG00000064225	1.26604	4.2e-06	3.37e-05	ST3GAL6	protein_coding	3	98732236	98821201	1
ENSG00000177380	0.582618	4.37e-06	3.49e-05	PPFIA3	protein_coding	19	49119389	49151026	1
ENSG00000116032	1.92835	4.48e-06	3.57e-05	GRIN3B	protein_coding	19	1000419	1009732	1
ENSG00000134297	0.645448	4.49e-06	3.58e-05	PLEKHA8P1	transcribed_processed_pseudogene	12	45173064	45216041	-1
ENSG00000105877	1.23632	4.55e-06	3.62e-05	DNAH11	protein_coding	7	21543215	21901839	1
ENSG00000234678	0.78829	4.56e-06	3.63e-05	ELF3-AS1	antisense	1	201995696	202010463	-1
ENSG00000161958	1.8046	4.61e-06	3.67e-05	FGF11	protein_coding	17	7438273	7444937	1
ENSG00000140398	0.846757	4.63e-06	3.68e-05	NEIL1	protein_coding	15	75346955	75357114	1
ENSG00000267062	1.39997	4.7e-06	3.73e-05	AC018761.2	antisense	19	12796823	12801849	1
ENSG00000128342	0.633091	4.77e-06	3.79e-05	LIF	protein_coding	22	30240447	30246851	-1
ENSG00000189223	0.817885	4.85e-06	3.84e-05	PAX8-AS1	processed_transcript	2	113211522	113276581	1
ENSG00000235374	1.08236	5.08e-06	4.02e-05	SSR4P1	transcribed_processed_pseudogene	21	45070952	45074165	-1
ENSG00000120278	0.826855	5.4e-06	4.25e-05	PLEKHG1	protein_coding	6	150599883	150843665	1
ENSG00000168243	1.90197	5.9e-06	4.62e-05	GNG4	protein_coding	1	235547687	235650754	-1
ENSG00000196611	2.24725	5.93e-06	4.63e-05	MMP1	protein_coding	11	102789920	102798160	-1
ENSG00000255031	0.635746	6.16e-06	4.79e-05	AP002807.1	antisense	11	68050740	68053762	1
ENSG00000185010	0.626284	6.15e-06	4.79e-05	F8	protein_coding	X	154835788	155026940	-1
ENSG00000225828	0.65006	6.3e-06	4.89e-05	FAM229A	protein_coding	1	32361270	32364278	-1
ENSG00000182782	6.2151	6.46e-06	5e-05	HCAR2	protein_coding	12	122701293	122703343	-1
ENSG00000270765	5.20204	6.5e-06	5.03e-05	GAS2L2	protein_coding	17	35744511	35752878	-1
ENSG00000227533	1.54081	6.57e-06	5.08e-05	SLC2A1-AS1	lincRNA	1	42959049	42983358	1
ENSG00000152582	0.68004	6.77e-06	5.23e-05	SPEF2	protein_coding	5	35617844	35814611	1
ENSG00000116525	0.608842	7e-06	5.38e-05	TRIM62	protein_coding	1	33145402	33182059	-1
ENSG00000091844	0.894568	7.11e-06	5.45e-05	RGS17	protein_coding	6	153004459	153131249	-1
ENSG00000228288	2.26558	7.54e-06	5.76e-05	PCAT6	antisense	1	202810954	202812156	1
ENSG00000054690	0.804899	7.83e-06	5.95e-05	PLEKHH1	protein_coding	14	67533301	67589612	1
ENSG00000272114	2.31045	8.75e-06	6.6e-05	AL136131.3	antisense	6	43770429	43770616	-1
ENSG00000157542	1.70925	8.82e-06	6.64e-05	KCNJ6	protein_coding	21	37607376	38121345	-1
ENSG00000258086	3.28744	9.14e-06	6.85e-05	AC079313.1	antisense	12	54353792	54466985	1
ENSG00000170006	0.832068	9.24e-06	6.91e-05	TMEM154	protein_coding	4	152618632	152680165	-1
ENSG00000154917	0.687352	9.56e-06	7.12e-05	RAB6B	protein_coding	3	133824239	133895836	-1
ENSG00000234498	0.952596	1.06e-05	7.85e-05	RPL13AP20	processed_pseudogene	12	12875499	12876107	1
ENSG00000215302	1.24961	1.12e-05	8.19e-05	AC127502.1	transcribed_unprocessed_pseudogene	15	30470779	30507623	1
ENSG00000267601	1.16731	1.12e-05	8.24e-05	AC022966.1	antisense	17	78855478	78855844	1
ENSG00000181652	4.52457	1.13e-05	8.25e-05	ATG9B	protein_coding	7	151012209	151024499	-1
ENSG00000115648	1.41654	1.15e-05	8.39e-05	MLPH	protein_coding	2	237485428	237555318	1
ENSG00000186832	1.19263	1.22e-05	8.84e-05	KRT16	protein_coding	17	41609778	41615899	-1
ENSG00000142623	0.931164	1.3e-05	9.44e-05	PADI1	protein_coding	1	17205126	17246005	1
ENSG00000176532	0.649986	1.41e-05	0.000101607	PRR15	protein_coding	7	29563811	29567295	1
ENSG00000235423	0.930921	1.49e-05	0.000107082	AC068768.1	antisense	12	123252030	123261483	-1
ENSG00000178150	1.73239	1.58e-05	0.000113174	ZNF114	protein_coding	19	48270102	48287608	1
ENSG00000186765	1.72641	1.64e-05	0.000116862	FSCN2	protein_coding	17	81528396	81537130	1
ENSG00000179362	3.43376	1.65e-05	0.000117573	HMGN2P46	transcribed_processed_pseudogene	15	45511136	45586290	1
ENSG00000159208	1.71614	1.71e-05	0.000121692	CIART	protein_coding	1	150282543	150287093	1
ENSG00000166924	1.40312	1.73e-05	0.000122751	NYAP1	protein_coding	7	100483927	100494799	1
ENSG00000101204	5.9842	1.77e-05	0.000125441	CHRNA4	protein_coding	20	63343223	63378401	-1
ENSG00000261780	0.886403	1.8e-05	0.000127423	LINC02582	processed_transcript	18	73324941	73349878	1
ENSG00000271581	1.00003	1.84e-05	0.000129929	AL671883.2	unprocessed_pseudogene	6	31356647	31357637	1
ENSG00000105929	1.27045	1.86e-05	0.000130804	ATP6V0A4	protein_coding	7	138706294	138799560	-1
ENSG00000164949	0.63476	1.86e-05	0.000130804	GEM	protein_coding	8	94249253	94262350	-1
ENSG00000261888	1.5423	2.07e-05	0.000144258	AC144831.1	lincRNA	17	83104255	83106910	1
ENSG00000223804	0.665055	2.08e-05	0.000145346	AC244669.1	transcribed_unprocessed_pseudogene	1	120267334	120341871	-1
ENSG00000251432	0.906538	2.23e-05	0.000154774	AC108062.1	lincRNA	4	128292751	128519394	1
ENSG00000181126	4.87455	2.34e-05	0.000161683	HLA-V	transcribed_unprocessed_pseudogene	6	29790954	29797811	1
ENSG00000274512	0.920636	2.4e-05	0.000164913	TBC1D3L	protein_coding	17	37977972	37989048	-1
ENSG00000162426	2.25801	2.44e-05	0.000167473	SLC45A1	protein_coding	1	8317826	8344167	1
ENSG00000153233	0.935487	2.53e-05	0.000173543	PTPRR	protein_coding	12	70638073	70920843	-1
ENSG00000178573	5.83478	2.6e-05	0.000177853	MAF	protein_coding	16	79585843	79600714	-1
ENSG00000110328	1.21425	2.68e-05	0.000182487	GALNT18	protein_coding	11	11270876	11622005	-1
ENSG00000269926	1.528	3.06e-05	0.000205664	DDIT4-AS1	antisense	10	72274915	72275980	-1
ENSG00000187266	0.699965	3.19e-05	0.000213608	EPOR	protein_coding	19	11377205	11384342	-1
ENSG00000103034	0.630488	3.34e-05	0.00022256	NDRG4	protein_coding	16	58462846	58513628	1
ENSG00000218537	1.38801	3.5e-05	0.000232134	MIF-AS1	antisense	22	23894426	23898930	-1
ENSG00000285043	0.797997	3.55e-05	0.000234969	AC093512.2	protein_coding	16	30053090	30070420	1
ENSG00000257913	1.0487	3.69e-05	0.000244127	DDN-AS1	antisense	12	48998367	49019235	1
ENSG00000125378	0.618138	3.88e-05	0.0002556	BMP4	protein_coding	14	53949736	53958761	-1
ENSG00000271781	0.651404	3.99e-05	0.000262329	AC026740.1	antisense	5	675826	676616	1
ENSG00000124839	0.905511	4.18e-05	0.000273745	RAB17	protein_coding	2	237574322	237601614	-1
ENSG00000226332	0.726957	4.34e-05	0.000283259	AL354836.1	antisense	20	62305432	62306325	-1
ENSG00000225855	0.784202	4.49e-05	0.000291989	RUSC1-AS1	antisense	1	155316863	155324176	-1
ENSG00000214145	1.79994	4.53e-05	0.000294293	LINC00887	lincRNA	3	194296465	194312803	-1
ENSG00000180720	3.58668	4.61e-05	0.000299342	CHRM4	protein_coding	11	46385098	46386608	-1
ENSG00000125735	2.996	4.63e-05	0.000300557	TNFSF14	protein_coding	19	6661253	6670588	-1
ENSG00000172716	0.793981	4.73e-05	0.000306523	SLFN11	protein_coding	17	35350305	35373701	-1
ENSG00000265401	0.74488	5.12e-05	0.00032912	AC093484.3	antisense	17	16382152	16382669	-1
ENSG00000253882	1.89828	5.13e-05	0.000329682	AC099548.2	transcribed_unprocessed_pseudogene	7	143761790	143836933	-1
ENSG00000259354	2.14389	5.36e-05	0.000342758	AC025580.2	antisense	15	45448427	45513767	1
ENSG00000135127	0.839146	5.56e-05	0.000354485	BICDL1	protein_coding	12	119989869	120094494	1
ENSG00000120279	2.16199	5.57e-05	0.000355025	MYCT1	protein_coding	6	152697895	152724567	1
ENSG00000267469	1.41659	5.87e-05	0.000372298	AC005944.1	antisense	19	3052910	3053724	1
ENSG00000234961	1.3971	6.02e-05	0.000380527	AL133415.1	antisense	10	17233325	17234833	-1
ENSG00000270504	0.581352	6.07e-05	0.000382972	AL391422.4	antisense	6	3751111	3753871	1
ENSG00000107147	5.51987	6.27e-05	0.000394911	KCNT1	protein_coding	9	135702185	135795508	1
ENSG00000187642	4.00658	6.37e-05	0.000400678	PERM1	protein_coding	1	975204	982093	-1
ENSG00000280195	0.795358	6.65e-05	0.000416049	AC245140.2	antisense	X	154396878	154398816	-1
ENSG00000104892	1.11024	6.94e-05	0.000432194	KLC3	protein_coding	19	45333434	45351520	1
ENSG00000105613	0.621052	7.07e-05	0.000440144	MAST1	protein_coding	19	12833951	12874951	1
ENSG00000164362	0.790995	7.3e-05	0.000453406	TERT	protein_coding	5	1253147	1295069	-1
ENSG00000231881	3.13568	7.78e-05	0.000480641	AL109615.2	lincRNA	6	44073913	44077952	1
ENSG00000136286	0.623667	8.11e-05	0.000500012	MYO1G	protein_coding	7	44962662	44979098	-1
ENSG00000186076	1.04419	8.28e-05	0.000508997	AC012085.1	processed_pseudogene	12	93640822	93641586	-1
ENSG00000136383	1.25544	8.37e-05	0.000513784	ALPK3	protein_coding	15	84816680	84873482	1
ENSG00000280239	0.968011	8.38e-05	0.000514182	AC011498.7	TEC	19	4448810	4450836	1
ENSG00000119514	0.886575	8.62e-05	0.000526317	GALNT12	protein_coding	9	98807699	98850081	1
ENSG00000183840	0.591856	8.84e-05	0.000538438	GPR39	protein_coding	2	132416574	132646559	1
ENSG00000134538	1.42755	9.01e-05	0.000548216	SLCO1B1	protein_coding	12	21131202	21239246	1
ENSG00000267458	1.38715	9.22e-05	0.000560086	AC092069.1	antisense	19	12944118	12944487	-1
ENSG00000105668	4.4489	9.48e-05	0.000574554	UPK1A	protein_coding	19	35666516	35678483	1
ENSG00000139269	1.03333	9.66e-05	0.000585113	INHBE	protein_coding	12	57452323	57459280	1
ENSG00000224407	0.940944	9.78e-05	0.000591103	AL136988.1	antisense	1	230280312	230281893	-1
ENSG00000186469	0.609824	9.81e-05	0.000592217	GNG2	protein_coding	14	51826195	51979342	1
ENSG00000167103	0.927195	0.00011198	0.000667782	PIP5KL1	protein_coding	9	127920879	127930797	-1
ENSG00000130600	1.14043	0.000112459	0.000670415	H19	processed_transcript	11	1995176	2001470	-1
ENSG00000166592	1.5584	0.000118128	0.000701874	RRAD	protein_coding	16	66921679	66925644	-1
ENSG00000161653	0.803332	0.000119174	0.000707619	NAGS	protein_coding	17	44004546	44009063	1
ENSG00000161914	0.621476	0.000125968	0.000744011	ZNF653	protein_coding	19	11483427	11505923	-1
ENSG00000265168	4.38538	0.000127625	0.000752806	AC005726.4	antisense	17	28573117	28574243	1
ENSG00000236453	3.03022	0.000127977	0.000754637	AC003092.1	lincRNA	7	94022833	94066661	1
ENSG00000283511	1.67594	0.000129388	0.00076145	AC137936.2	transcribed_unitary_pseudogene	3	58180009	58187495	1
ENSG00000130822	1.47619	0.000130584	0.000766976	PNCK	protein_coding	X	153669730	153689010	-1
ENSG00000231064	0.720358	0.000132239	0.000775413	AC234582.1	antisense	1	155195004	155205495	1
ENSG00000115008	0.803755	0.000136199	0.0007948	IL1A	protein_coding	2	112773915	112784590	-1
ENSG00000130653	0.905656	0.00014037	0.000815893	PNPLA7	protein_coding	9	137459953	137550534	-1
ENSG00000273117	1.0036	0.000140965	0.000819086	AC144652.1	lincRNA	7	155295918	155297541	-1
ENSG00000179715	0.692316	0.000149504	0.000860885	PCED1B	protein_coding	12	47079603	47236662	1
ENSG00000234883	1.2746	0.000150626	0.000867068	MIR155HG	lincRNA	21	25561909	25575168	1
ENSG00000250920	1.03363	0.000151386	0.000870882	AC105460.1	lincRNA	4	103550927	103559127	-1
ENSG00000169429	1.12622	0.000153003	0.000879621	CXCL8	protein_coding	4	73740506	73743716	1
ENSG00000203499	0.618808	0.000157472	0.000903862	IQANK1	protein_coding	8	143734140	143790644	1
ENSG00000163462	0.617753	0.000158036	0.00090652	TRIM46	protein_coding	1	155173787	155184971	1
ENSG00000111199	3.82193	0.000161926	0.000926457	TRPV4	protein_coding	12	109783085	109833401	-1
ENSG00000164283	2.11506	0.000165909	0.000947432	ESM1	protein_coding	5	54977864	55022671	-1
ENSG00000174370	0.699107	0.000167743	0.000956075	C11orf45	protein_coding	11	128899565	128906035	-1
ENSG00000186862	0.961837	0.000167924	0.000956806	PDZD7	protein_coding	10	101007683	101032295	-1
ENSG00000103269	0.591934	0.000177671	0.00100754	RHBDL1	protein_coding	16	675666	678268	1
ENSG00000226287	1.34247	0.000182994	0.00103444	TMEM191A	transcribed_unprocessed_pseudogene	22	20701114	20704606	1
ENSG00000253669	0.730374	0.000185185	0.00104419	GASAL1	lincRNA	8	102805517	102809971	1
ENSG00000185168	1.27289	0.000196704	0.00110255	LINC00482	lincRNA	17	81303771	81309248	-1
ENSG00000267757	0.582023	0.000197913	0.00110829	EML2-AS1	processed_transcript	19	45641494	45642840	1
ENSG00000108813	0.737747	0.000210556	0.00117212	DLX4	protein_coding	17	49968970	49974959	1
ENSG00000204362	1.02757	0.000211974	0.00117929	AL590644.1	lincRNA	1	17189783	17197617	1
ENSG00000175591	0.585087	0.000215319	0.00119641	P2RY2	protein_coding	11	73218298	73236352	1
ENSG00000266088	0.935884	0.00021759	0.0012079	AC004585.1	lincRNA	17	40517026	40527002	1
ENSG00000140009	3.24307	0.000220315	0.00122076	ESR2	protein_coding	14	64084232	64338112	-1
ENSG00000115009	2.92435	0.000220611	0.00122202	CCL20	protein_coding	2	227805739	227817564	1
ENSG00000221792	0.850703	0.000229505	0.00126698	MIR1282	miRNA	15	43793659	43793759	-1
ENSG00000159337	4.14876	0.000234607	0.00129355	PLA2G4D	protein_coding	15	42067009	42094554	-1
ENSG00000177465	0.608274	0.000247204	0.00135633	ACOT4	protein_coding	14	73591706	73596496	1
ENSG00000181826	0.65267	0.000248522	0.00136314	RELL1	protein_coding	4	37590800	37686376	-1
ENSG00000174945	0.848508	0.000270184	0.00146669	AMZ1	protein_coding	7	2679522	2775500	1
ENSG00000237499	1.0548	0.000280848	0.00151859	AL357060.1	antisense	6	137823673	137868233	-1
ENSG00000251151	0.633638	0.000284431	0.00153565	HOXC-AS3	processed_transcript	12	53981509	53985519	-1
ENSG00000247033	4.93732	0.000295027	0.00158712	AC099508.1	antisense	16	75108601	75110712	-1
ENSG00000259820	0.744124	0.000296222	0.00159259	AC083843.2	lincRNA	8	134792020	134798272	-1
ENSG00000167701	1.31651	0.000297878	0.00160006	GPT	protein_coding	8	144502973	144507174	1
ENSG00000260412	1.18522	0.000304655	0.00163205	AL353746.1	sense_overlapping	9	27937617	27944497	-1
ENSG00000205744	1.27616	0.000316148	0.00169059	DENND1C	protein_coding	19	6467207	6482557	-1
ENSG00000121769	0.968373	0.000316635	0.00169269	FABP3	protein_coding	1	31365625	31376850	-1
ENSG00000171608	0.653063	0.000324935	0.0017324	PIK3CD	protein_coding	1	9651732	9729114	1
ENSG00000280719	2.35649	0.000333285	0.00177008	PCAT5	lincRNA	10	35778302	35800920	1
ENSG00000260428	0.805277	0.000344011	0.00182326	SCX	protein_coding	8	144266560	144268481	1
ENSG00000092421	2.28672	0.000381416	0.00199845	SEMA6A	protein_coding	5	116443616	116574934	-1
ENSG00000215644	0.796777	0.000401144	0.00209081	GCGR	protein_coding	17	81804132	81814013	1
ENSG00000205593	0.640545	0.000411732	0.0021379	DENND6B	protein_coding	22	50309030	50327060	-1
ENSG00000134061	0.930825	0.000421489	0.00218287	CD180	protein_coding	5	67179613	67196799	-1
ENSG00000272909	0.870677	0.000466785	0.00238982	AL122035.2	antisense	14	64440369	64442238	-1
ENSG00000105246	1.87156	0.000476801	0.00243078	EBI3	protein_coding	19	4229498	4237531	1
ENSG00000223802	1.82138	0.000496213	0.00252246	CERS1	protein_coding	19	18868545	18896727	-1
ENSG00000101265	2.25112	0.000504592	0.00256142	RASSF2	protein_coding	20	4780023	4823645	-1
ENSG00000168350	3.49508	0.000516087	0.00261607	DEGS2	protein_coding	14	100143957	100160163	-1
ENSG00000214514	1.97678	0.000521408	0.00263856	KRT42P	transcribed_unprocessed_pseudogene	17	41626327	41640199	-1
ENSG00000164400	3.85013	0.00054951	0.00276359	CSF2	protein_coding	5	132073790	132076170	1
ENSG00000166321	0.76442	0.000562231	0.00281729	NUDT13	protein_coding	10	73110375	73131828	1
ENSG00000164120	0.616518	0.000566524	0.00283642	HPGD	protein_coding	4	174490177	174523154	-1
ENSG00000095932	1.44268	0.000568784	0.00284455	SMIM24	protein_coding	19	3473986	3480542	-1
ENSG00000272273	0.966095	0.000612034	0.00303795	IER3-AS1	antisense	6	30742929	30743592	1
ENSG00000250509	0.987429	0.000622327	0.00308392	AC034213.1	lincRNA	5	180441559	180443238	1
ENSG00000077585	0.620883	0.000630263	0.00311721	GPR137B	protein_coding	1	236142505	236221865	1
ENSG00000279117	0.793661	0.000646006	0.00318715	AP001972.5	TEC	11	75260129	75262466	-1
ENSG00000136918	0.788147	0.000659027	0.00324603	WDR38	protein_coding	9	124853417	124857890	1
ENSG00000116990	1.67141	0.000700593	0.00343189	MYCL	protein_coding	1	39895426	39902256	-1
ENSG00000137440	0.689764	0.000711185	0.00347656	FGFBP1	protein_coding	4	15935569	15938740	-1
ENSG00000151715	1.20068	0.000720847	0.00351495	TMEM45B	protein_coding	11	129815819	129860003	1
ENSG00000267980	0.963566	0.000738494	0.00359201	AC007292.1	antisense	19	4363789	4364640	1
ENSG00000164266	1.43224	0.000770309	0.00372451	SPINK1	protein_coding	5	147824568	147831786	-1
ENSG00000280213	1.20804	0.000778833	0.00376471	UCKL1-AS1	antisense	20	63953384	63956985	1
ENSG00000185633	1.19022	0.000790952	0.00381711	NDUFA4L2	protein_coding	12	57234903	57240715	-1
ENSG00000260231	1.22341	0.000806806	0.00388943	KDM7A-DT	bidirectional_promoter_lncRNA	7	140177184	140179640	1
ENSG00000198417	1.52878	0.000810044	0.00390294	MT1F	protein_coding	16	56657694	56660698	1
ENSG00000255992	1.29455	0.000812158	0.00391102	AC131009.1	lincRNA	12	131924736	131929351	-1
ENSG00000167733	0.756338	0.000821913	0.00395292	HSD11B1L	protein_coding	19	5680604	5688523	1
ENSG00000105650	2.38904	0.00083937	0.00403123	PDE4C	protein_coding	19	18208652	18248200	-1
ENSG00000171766	1.33663	0.000846363	0.00406264	GATM	protein_coding	15	45361124	45402327	-1
ENSG00000188747	0.763485	0.000885371	0.00422835	NOXA1	protein_coding	9	137423350	137434406	1
ENSG00000170345	0.623839	0.000890885	0.00425128	FOS	protein_coding	14	75278774	75282230	1
ENSG00000055813	1.26775	0.000921877	0.00437586	CCDC85A	protein_coding	2	56184123	56386173	1
ENSG00000167995	0.933624	0.000948229	0.00449024	BEST1	protein_coding	11	61949821	61965515	1
ENSG00000225721	0.724004	0.000952697	0.00450986	AL592166.1	antisense	1	44759037	44775810	-1
ENSG00000223723	1.24305	0.000958211	0.00453272	BX842568.2	processed_pseudogene	X	36962196	36963425	-1
ENSG00000205325	0.728477	0.000966311	0.004565	AC005863.1	lincRNA	17	14767583	14780203	-1
ENSG00000264577	1.00388	0.000979273	0.00461893	AC010761.1	antisense	17	28721487	28722877	-1
ENSG00000164484	1.04189	0.00098694	0.00464897	TMEM200A	protein_coding	6	130365734	130443063	1
ENSG00000279283	1.29033	0.00100478	0.00472307	AC131009.4	TEC	12	131896500	131898239	1
ENSG00000148655	0.721766	0.00103509	0.00485233	LRMDA	protein_coding	10	75431453	76560167	1
ENSG00000185519	0.618441	0.00103526	0.00485233	FAM131C	protein_coding	1	16057769	16073632	-1
ENSG00000100167	0.771226	0.00104623	0.00489989	2003-09-01	protein_coding	22	41969475	41998221	1
ENSG00000124102	0.739198	0.00106463	0.00497827	PI3	protein_coding	20	45174876	45176544	1
ENSG00000125910	2.48602	0.00107179	0.00500444	S1PR4	protein_coding	19	3172346	3180332	1
ENSG00000144843	1.22222	0.00109506	0.00510459	ADPRH	protein_coding	3	119579268	119589945	1
ENSG00000273554	2.75983	0.00109622	0.00510867	AC136616.1	protein_coding	KI270728.1	1139577	1147868	-1
ENSG00000261227	2.29926	0.00111207	0.0051704	AC140912.1	lincRNA	16	73232055	73233970	1
ENSG00000163293	0.944911	0.00111977	0.00519544	NIPAL1	protein_coding	4	47914142	48040173	1
ENSG00000198768	0.858781	0.00114061	0.00527861	APCDD1L	protein_coding	20	58459101	58515131	-1
ENSG00000237399	1.03876	0.00117382	0.00541397	PITRM1-AS1	antisense	10	3141632	3167972	1
ENSG00000188763	0.641246	0.00117514	0.00541864	FZD9	protein_coding	7	73433783	73436120	1
ENSG00000104321	0.771581	0.00117553	0.00541904	TRPA1	protein_coding	8	72019917	72075617	-1
ENSG00000197540	1.83134	0.00119818	0.00551352	GZMM	protein_coding	19	544034	549924	1
ENSG00000243710	1.45538	0.00120407	0.00553635	CFAP57	protein_coding	1	43172149	43254358	1
ENSG00000236658	1.91822	0.00121892	0.00559745	AL161733.1	antisense	9	130933851	130945520	1
ENSG00000162545	0.948688	0.00124392	0.00569914	CAMK2N1	protein_coding	1	20482391	20486220	-1
ENSG00000136689	1.9225	0.00126437	0.00578393	IL1RN	protein_coding	2	113107214	113134016	1
ENSG00000188277	1.13278	0.00127545	0.00582572	C15orf62	protein_coding	15	40770080	40772449	1
ENSG00000229124	0.875584	0.00131755	0.00600116	VIM-AS1	antisense	10	17214239	17229985	-1
ENSG00000244161	0.966493	0.00132075	0.00601423	FLNB-AS1	antisense	3	58162547	58170636	-1
ENSG00000232729	1.02428	0.00134155	0.00609808	AC211433.1	processed_transcript	7	74688939	74729001	-1
ENSG00000165959	0.659952	0.0013653	0.00619819	CLMN	protein_coding	14	95181940	95319906	-1
ENSG00000107742	0.756895	0.001371	0.00621618	SPOCK2	protein_coding	10	72059035	72089032	-1
ENSG00000217236	3.41601	0.00139046	0.00629805	SP9	protein_coding	2	174334946	174338492	1
ENSG00000136155	0.789208	0.0014061	0.0063592	SCEL	protein_coding	13	77535674	77645263	1
ENSG00000182472	1.02377	0.00143857	0.00648969	CAPN12	protein_coding	19	38730187	38769904	-1
ENSG00000116014	3.11586	0.00145306	0.00654352	KISS1R	protein_coding	19	917287	921015	1
ENSG00000131435	2.66152	0.00146899	0.00660529	PDLIM4	protein_coding	5	132257671	132273454	1
ENSG00000218582	1.12764	0.0014941	0.00670137	GAPDHP63	processed_pseudogene	6	79953005	79954011	-1
ENSG00000137474	0.933477	0.00149701	0.00671109	MYO7A	protein_coding	11	77128264	77215241	1
ENSG00000261505	0.947419	0.00152723	0.00682774	AL031714.1	antisense	16	1317891	1322845	-1
ENSG00000262211	0.953397	0.00154434	0.00688535	AC008914.1	antisense	5	55936143	55941727	1
ENSG00000279605	0.67747	0.00155434	0.00692477	AC067930.6	TEC	8	143578358	143583304	1
ENSG00000203865	0.762609	0.00156569	0.0069632	ATP1A1-AS1	processed_transcript	1	116392247	116418622	-1
ENSG00000182580	1.45619	0.00170666	0.00749526	EPHB3	protein_coding	3	184561784	184582409	1
ENSG00000171462	1.17012	0.00171759	0.00753586	DLK2	protein_coding	6	43450352	43456632	-1
ENSG00000161277	0.595705	0.00172731	0.00757667	THAP8	protein_coding	19	36034985	36054762	-1
ENSG00000100628	2.37865	0.00175888	0.00770381	ASB2	protein_coding	14	93934153	93976791	-1
ENSG00000214922	0.857088	0.00177824	0.00777151	HLA-F-AS1	processed_transcript	6	29726601	29749049	-1
ENSG00000154263	0.843166	0.00181443	0.00790811	ABCA10	protein_coding	17	69147214	69244846	-1
ENSG00000116661	0.678882	0.00181739	0.00791748	FBXO2	protein_coding	1	11637018	11655785	-1
ENSG00000101134	2.31112	0.00189094	0.00820151	DOK5	protein_coding	20	54475597	54651171	1
ENSG00000156453	0.587731	0.00192863	0.0083453	PCDH1	protein_coding	5	141853111	141879246	-1
ENSG00000163661	0.65926	0.00197969	0.00854765	PTX3	protein_coding	3	157436789	157443628	1
ENSG00000130675	0.793226	0.00205286	0.00883377	MNX1	protein_coding	7	156994051	157010651	-1
ENSG00000140511	0.650254	0.00209696	0.00899691	HAPLN3	protein_coding	15	88877288	88895626	-1
ENSG00000255966	1.30381	0.00210436	0.00901855	AC006064.3	antisense	12	6532290	6533498	-1
ENSG00000248019	0.873025	0.00228478	0.009722	FAM13A-AS1	antisense	4	88709789	88730103	1
ENSG00000005961	1.15865	0.00228671	0.0097279	ITGA2B	protein_coding	17	44372180	44389505	-1
ENSG00000240032	1.19161	0.00229982	0.009779	LNCSRLR	antisense	3	146066344	146069185	-1
ENSG00000115266	0.686752	0.0023759	0.0100524	APC2	protein_coding	19	1446302	1473244	1
ENSG00000117407	0.69766	0.00241192	0.0101808	ARTN	protein_coding	1	43933320	43937241	1
ENSG00000164850	0.933116	0.0024489	0.010315	GPER1	protein_coding	7	1082208	1093815	1
ENSG00000280160	1.44543	0.00245626	0.0103363	AC135050.7	TEC	16	31093727	31095944	1
ENSG00000136274	0.731129	0.002514	0.0105489	NACAD	protein_coding	7	45080438	45088914	-1
ENSG00000254452	1.25079	0.00258633	0.0108151	AP001107.2	antisense	11	66276779	66277492	-1
ENSG00000283973	1.77009	0.00259474	0.0108426	AC099795.1	lincRNA	1	42959065	42961864	-1
ENSG00000231298	1.28226	0.00263061	0.0109771	MANCR	lincRNA	10	4650185	4678154	-1
ENSG00000267069	2.00816	0.00264953	0.0110432	AP005264.1	lincRNA	18	12288308	12291488	1
ENSG00000162490	2.43837	0.00267693	0.0111395	DRAXIN	protein_coding	1	11691729	11725857	1
ENSG00000148053	2.41568	0.00276622	0.011451	NTRK2	protein_coding	9	84668551	85027070	1
ENSG00000140323	0.658867	0.00280718	0.0116058	DISP2	protein_coding	15	40358235	40378639	1
ENSG00000272977	0.985472	0.00281854	0.0116447	AL008721.2	sense_intronic	22	25476218	25479971	1
ENSG00000280927	0.991522	0.00282803	0.0116731	CTBP1-AS	antisense	4	1210120	1218591	1
ENSG00000174788	1.25767	0.00283433	0.0116964	PCP2	protein_coding	19	7631611	7633748	-1
ENSG00000176428	1.3515	0.00288838	0.0118948	VPS37D	protein_coding	7	73667825	73672112	1
ENSG00000152784	0.973177	0.00291879	0.0120035	PRDM8	protein_coding	4	80183879	80204329	1
ENSG00000142959	1.2489	0.00293452	0.0120599	BEST4	protein_coding	1	44783585	44787705	-1
ENSG00000082126	1.06544	0.00295035	0.0121115	MPP4	protein_coding	2	201644870	201698694	-1
ENSG00000188707	0.711986	0.00297807	0.0122114	ZBED6CL	protein_coding	7	150329789	150332721	1
ENSG00000258745	1.26814	0.00302519	0.0123785	AL358334.3	antisense	14	50912226	50913358	1
ENSG00000183508	1.10259	0.00306168	0.012499	TENT5C	protein_coding	1	117605934	117628372	1
ENSG00000100626	1.03198	0.00306231	0.012499	GALNT16	protein_coding	14	69259277	69357033	1
ENSG00000267030	0.982737	0.00322297	0.0130546	AC011498.2	antisense	19	4447304	4448217	1
ENSG00000232788	1.34078	0.00326585	0.0132064	ITGA6-AS1	antisense	2	172464262	172466022	-1
ENSG00000002079	1.04464	0.00334132	0.0134721	MYH16	transcribed_unitary_pseudogene	7	99238829	99311130	1
ENSG00000099251	0.918618	0.00337641	0.0135983	HSD17B7P2	transcribed_unprocessed_pseudogene	10	38356380	38378505	1
ENSG00000258824	0.658666	0.00343787	0.0138023	AL122035.1	antisense	14	64422935	64448557	-1
ENSG00000188163	0.663825	0.00351171	0.0140484	FAM166A	protein_coding	9	137243584	137247770	-1
ENSG00000125531	1.57982	0.00356829	0.0142303	FNDC11	protein_coding	20	63547891	63556708	1
ENSG00000197635	1.66182	0.00367063	0.0145994	DPP4	protein_coding	2	161992241	162074542	-1
ENSG00000274177	1.27054	0.00369865	0.0146847	AC004528.2	antisense	19	1010221	1010907	1
ENSG00000245322	0.692416	0.0037527	0.0148697	AC097460.1	antisense	4	99950006	100195099	1
ENSG00000234476	0.681594	0.00382286	0.0151009	AC092811.1	sense_intronic	1	225447243	225465343	-1
ENSG00000256443	2.64495	0.00385382	0.0152031	AP003559.1	lincRNA	11	61539516	61542259	-1
ENSG00000177182	1.08042	0.00388426	0.0153165	CLVS1	protein_coding	8	61057158	61501645	1
ENSG00000185306	0.864347	0.00395861	0.0155685	C12orf56	protein_coding	12	64264762	64391192	-1
ENSG00000268854	1.2822	0.00401166	0.0157357	AC020909.3	antisense	19	50480119	50483351	-1
ENSG00000273361	1.18453	0.00406705	0.015932	AC021016.3	antisense	2	218398743	218399219	-1
ENSG00000225206	0.630961	0.0041049	0.0160417	MIR137HG	lincRNA	1	97933474	98049863	-1
ENSG00000149634	0.774595	0.00417117	0.0162581	SPATA25	protein_coding	20	45886489	45887635	-1
ENSG00000185614	0.833789	0.00424893	0.0165145	INKA1	protein_coding	3	49803254	49805030	1
ENSG00000166145	0.766177	0.0044252	0.017081	SPINT1	protein_coding	15	40844018	40858207	1
ENSG00000186919	0.750629	0.00452659	0.0174198	ZACN	protein_coding	17	76071961	76083666	1
ENSG00000142765	1.18618	0.004552	0.0175063	SYTL1	protein_coding	1	27342020	27353937	1
ENSG00000179477	1.41431	0.00463279	0.0177598	ALOX12B	protein_coding	17	8072636	8087716	-1
ENSG00000228486	0.809536	0.00493561	0.0187898	C2orf92	protein_coding	2	97664217	97703064	1
ENSG00000100078	0.65502	0.00496802	0.0188913	PLA2G3	protein_coding	22	31134809	31140607	-1
ENSG00000275120	1.24176	0.00502432	0.019073	AC048382.5	antisense	15	84597809	84633987	-1
ENSG00000104953	0.891855	0.00502393	0.019073	TLE6	protein_coding	19	2977446	2995184	1
ENSG00000276141	2.48525	0.00503222	0.019099	WHAMMP3	transcribed_unprocessed_pseudogene	15	22664359	22686213	1
ENSG00000260466	0.89186	0.00504717	0.0191436	AC126696.2	antisense	16	87836532	87837663	1
ENSG00000049249	0.737254	0.00506261	0.019194	TNFRSF9	protein_coding	1	7915894	7943165	-1
ENSG00000151651	0.834576	0.00513267	0.0194308	ADAM8	protein_coding	10	133262403	133276868	-1
ENSG00000186868	0.898433	0.0051725	0.0195733	MAPT	protein_coding	17	45894382	46028334	1
ENSG00000275223	0.703303	0.00522784	0.0197535	AL121906.2	lincRNA	20	33655701	33656423	-1
ENSG00000233381	1.84533	0.00523752	0.0197859	AK4P3	processed_pseudogene	12	31615771	31616439	-1
ENSG00000163359	0.922452	0.00539758	0.0203278	COL6A3	protein_coding	2	237324003	237414375	-1
ENSG00000048052	0.588843	0.0053991	0.0203278	HDAC9	protein_coding	7	18086949	19002416	1
ENSG00000280219	0.65512	0.00551658	0.0207265	AC093908.1	TEC	4	147487971	147496062	1
ENSG00000172426	1.82812	0.00566698	0.0212026	RSPH9	protein_coding	6	43645046	43672599	1
ENSG00000255443	0.917441	0.00581617	0.0216967	CD44-AS1	antisense	11	35210343	35214985	-1
ENSG00000279518	0.776503	0.00591754	0.0220388	AC083843.3	TEC	8	134783694	134785879	-1
ENSG00000267633	1.35607	0.00597821	0.0222371	AC008686.1	antisense	19	13772118	13774118	-1
ENSG00000262112	1.55484	0.0060292	0.0223942	AC015912.1	antisense	17	56888880	56891841	1
ENSG00000173013	0.696819	0.00610575	0.0226316	CCDC96	protein_coding	4	7040849	7042939	-1
ENSG00000181634	0.621021	0.00612382	0.0226798	TNFSF15	protein_coding	9	114784635	114806126	-1
ENSG00000230408	0.962153	0.00615532	0.0227823	AC007163.1	antisense	2	200780495	200812170	-1
ENSG00000266053	0.915546	0.00621953	0.022963	NDUFV2-AS1	antisense	18	9121265	9136645	-1
ENSG00000154856	0.898264	0.00627257	0.023135	APCDD1	protein_coding	18	10454628	10489948	1
ENSG00000245156	0.834628	0.00636415	0.0234294	AP001107.1	lincRNA	11	66269832	66278525	-1
ENSG00000144596	1.72308	0.00641906	0.0236024	GRIP2	protein_coding	3	14489111	14556075	-1
ENSG00000256116	0.74969	0.0065365	0.0239813	AP001453.1	antisense	11	64229214	64234352	-1
ENSG00000161544	1.68761	0.00657968	0.024104	CYGB	protein_coding	17	76527356	76551175	-1
ENSG00000273443	0.720384	0.00665694	0.0243422	AL645608.8	lincRNA	1	1062208	1063288	-1
ENSG00000099337	0.613293	0.00674285	0.0246011	KCNK6	protein_coding	19	38319844	38332076	1
ENSG00000244041	0.714079	0.00683154	0.0249095	LINC01011	lincRNA	6	2987967	2991173	1
ENSG00000247679	0.62658	0.0068977	0.0251251	AC139795.2	antisense	5	177611253	177619754	1
ENSG00000174871	1.13846	0.00695669	0.025304	CNIH2	protein_coding	11	66278190	66285301	1
ENSG00000244256	1.07113	0.00715937	0.025894	RN7SL130P	misc_RNA	1	63655743	63656047	1
ENSG00000275454	0.838166	0.00719666	0.0260038	AC105020.6	antisense	15	75639760	75640976	1
ENSG00000273090	1.30892	0.0074691	0.0268193	AC007378.1	antisense	2	36513255	36513732	-1
ENSG00000228830	0.81057	0.00758483	0.0271695	AL160408.2	antisense	1	234607008	234609483	1
ENSG00000153707	0.612174	0.00760049	0.0272202	PTPRD	protein_coding	9	8314246	10612723	-1
ENSG00000173825	0.725609	0.00770544	0.027541	TIGD3	protein_coding	11	65354767	65357613	1
ENSG00000134571	1.33876	0.00776869	0.0277173	MYBPC3	protein_coding	11	47331397	47352702	-1
ENSG00000066230	0.750667	0.00792214	0.0281638	SLC9A3	protein_coding	5	470458	524332	-1
ENSG00000256034	0.719141	0.00818716	0.0289565	AP002770.1	antisense	11	73760563	73761070	1
ENSG00000233893	0.851998	0.00850946	0.0299016	EZR-AS1	antisense	6	158817979	158822252	1
ENSG00000236423	0.712273	0.00890598	0.0310997	LINC01134	lincRNA	1	3900372	3917225	1
ENSG00000183114	0.730196	0.00909999	0.0316723	FAM43B	protein_coding	1	20552439	20555010	1
ENSG00000166126	0.828012	0.00911243	0.0317032	AMN	protein_coding	14	102922656	102933596	1
ENSG00000110427	0.871687	0.00916431	0.0318343	KIAA1549L	protein_coding	11	33376466	33674102	1
ENSG00000235298	0.580491	0.00922253	0.0319807	AL354733.3	antisense	9	83972233	83975777	1
ENSG00000268879	0.91059	0.00923803	0.0320283	IGFL1P1	unprocessed_pseudogene	19	46196238	46197323	1
ENSG00000224272	0.661598	0.00930725	0.0322246	AC131097.3	antisense	2	241808312	241812016	-1
ENSG00000268983	0.916739	0.00934971	0.0323528	AC005253.2	antisense	19	18568506	18569375	-1
ENSG00000181409	0.828112	0.0095089	0.0328276	AATK	protein_coding	17	81117295	81166077	-1
ENSG00000231113	0.606328	0.00955395	0.0329514	AL035587.1	antisense	6	42940364	42948360	1
ENSG00000187260	0.784461	0.00969292	0.0333408	WDR86	protein_coding	7	151375909	151410727	-1
ENSG00000234945	0.832501	0.00989997	0.0339604	GTF3C2-AS1	antisense	2	27335535	27342599	1
ENSG00000143882	0.66665	0.0101408	0.0346218	ATP6V1C2	protein_coding	2	10721100	10785110	1
ENSG00000002587	0.650947	0.0102572	0.0348998	HS3ST1	protein_coding	4	11393150	11429765	-1
ENSG00000213928	0.684186	0.0104744	0.0355443	IRF9	protein_coding	14	24161053	24166565	1
ENSG00000147437	0.598692	0.0105521	0.0357471	GNRH1	protein_coding	8	25419260	25424654	-1
ENSG00000235847	0.834977	0.0106727	0.0360943	LDHAP7	processed_pseudogene	2	84777259	84778223	-1
ENSG00000262413	0.643288	0.0106803	0.036113	AC145207.2	antisense	17	81867721	81868552	1
ENSG00000228509	0.828133	0.0108125	0.036498	AC006460.1	antisense	2	190676944	190708716	-1
ENSG00000160973	0.637579	0.011088	0.0373227	FOXH1	protein_coding	8	144473412	144476335	-1
ENSG00000262624	0.684517	0.0113729	0.0381381	AC113189.1	antisense	17	7436557	7437523	-1
ENSG00000230212	0.68083	0.0115293	0.0385903	AP000688.1	sense_intronic	21	36069642	36126640	-1
ENSG00000276445	0.777529	0.0115785	0.0387333	AC005393.1	lincRNA	19	39812972	39813555	-1
ENSG00000228737	0.728687	0.0117931	0.0393338	AC008781.1	antisense	5	141618414	141626481	1
ENSG00000255108	0.772088	0.0122865	0.0407215	AP006621.1	antisense	11	823634	832883	-1
ENSG00000213574	0.770342	0.0123358	0.0408698	LDHAP5	processed_pseudogene	10	118932674	118933295	-1
ENSG00000089820	0.612893	0.0124257	0.0411146	ARHGAP4	protein_coding	X	153907367	153934999	-1
ENSG00000227495	0.686246	0.0127688	0.0420757	AC004771.1	antisense	17	5019214	5020093	-1
ENSG00000267858	0.619066	0.0130504	0.042857	MZF1-AS1	antisense	19	58559129	58574797	1
ENSG00000263155	0.637852	0.013244	0.0433816	MYZAP	protein_coding	15	57591941	57685364	1
ENSG00000275880	0.670932	0.0132601	0.0434264	AL139385.1	antisense	13	110613082	110616353	-1
ENSG00000241404	0.58562	0.0135926	0.0442966	EGFL8	protein_coding	6	32164583	32168281	1
ENSG00000173991	0.658972	0.0136442	0.0444486	TCAP	protein_coding	17	39664187	39666555	1
ENSG00000164404	0.658969	0.0136787	0.0445123	GDF9	protein_coding	5	132861181	132866884	-1
ENSG00000187017	0.704299	0.0137224	0.0446141	ESPN	protein_coding	1	6424776	6461367	1
ENSG00000216285	0.666648	0.0138418	0.044937	AC078819.1	processed_pseudogene	12	104030779	104031543	1
ENSG00000108551	0.695674	0.0141781	0.0458791	RASD1	protein_coding	17	17494437	17496395	-1
ENSG00000215769	0.673425	0.0142907	0.0462016	ARHGAP27P1-BPTFP1-KPNA2P3	processed_transcript	17	64749663	64781707	-1
ENSG00000260910	0.688888	0.014392	0.0464622	LINC00565	lincRNA	13	113926514	113928844	-1
ENSG00000227906	0.683657	0.0147706	0.047513	SNAP25-AS1	antisense	20	10021978	10368776	-1
ENSG00000117643	0.645041	0.0148358	0.0476799	MAN1C1	protein_coding	1	25617468	25786207	1
ENSG00000276180	0.592725	0.0148874	0.0478019	HIST1H4I	protein_coding	6	27138588	27139881	1
ENSG00000272512	0.637937	0.0153232	0.0489914	AL645608.7	lincRNA	1	995966	998051	-1
ENSG00000115257	0.632502	0.0156886	0.0499993	PCSK4	protein_coding	19	1481428	1490752	-1

## Sheet: HeLa 24h_down
ensembl_gene_id	log2FoldChange	pvalue	FDR	external_gene_name	gene_biotype	chromosome_name	start_position	end_position	strand
ENSG00000117318	-0.991732	2.95e-71	4.15e-69	ID3	protein_coding	1	23557918	23559794	-1
ENSG00000211584	-1.12256	1.15e-59	1.34e-57	SLC48A1	protein_coding	12	47753916	47782753	1
ENSG00000187634	-0.978082	5.55e-50	5.37e-48	SAMD11	protein_coding	1	923928	944581	1
ENSG00000165271	-0.709455	1.72e-48	1.61e-46	NOL6	protein_coding	9	33461441	33473930	-1
ENSG00000181019	-0.641361	2.83e-47	2.55e-45	NQO1	protein_coding	16	69706996	69726951	-1
ENSG00000151012	-0.714511	8.39e-46	7.23e-44	SLC7A11	protein_coding	4	138164097	138242349	-1
ENSG00000187325	-1.05296	1.03e-44	8.59e-43	TAF9B	protein_coding	X	78129748	78139706	-1
ENSG00000110090	-0.786737	4.76e-44	3.86e-42	CPT1A	protein_coding	11	68754620	68844410	-1
ENSG00000145703	-1.04744	1.88e-43	1.49e-41	IQGAP2	protein_coding	5	76403249	76708132	1
ENSG00000004799	-0.843067	9.54e-38	6.65e-36	PDK4	protein_coding	7	95583499	95596491	-1
ENSG00000141052	-1.3404	6.64e-37	4.49e-35	MYOCD	protein_coding	17	12665890	12768949	1
ENSG00000023909	-0.751199	9.25e-36	6e-34	GCLM	protein_coding	1	93885205	93909456	-1
ENSG00000108602	-0.695929	5.84e-35	3.69e-33	ALDH3A1	protein_coding	17	19737984	19748943	-1
ENSG00000078018	-1.12187	6.05e-35	3.82e-33	MAP2	protein_coding	2	209424058	209734118	1
ENSG00000082516	-0.680602	9.09e-35	5.67e-33	GEMIN5	protein_coding	5	154887416	154938209	-1
ENSG00000196139	-0.77092	5.93e-34	3.61e-32	AKR1C3	protein_coding	10	5035354	5107686	1
ENSG00000180537	-0.611589	2.87e-33	1.72e-31	RNF182	protein_coding	6	13924446	13980302	1
ENSG00000112576	-0.588501	2.64e-32	1.51e-30	CCND3	protein_coding	6	41934933	42050357	-1
ENSG00000116711	-0.670778	1.23e-31	6.95e-30	PLA2G4A	protein_coding	1	186828953	186988981	1
ENSG00000167703	-1.36408	1.2e-29	6.37e-28	SLC43A2	protein_coding	17	1569267	1628886	-1
ENSG00000104356	-0.745078	7.56e-29	3.85e-27	POP1	protein_coding	8	98117297	98159834	1
ENSG00000125968	-0.735685	1.13e-28	5.7e-27	ID1	protein_coding	20	31605283	31606515	1
ENSG00000135002	-0.624328	7.05e-27	3.3e-25	RFK	protein_coding	9	76385517	76394517	-1
ENSG00000070785	-0.789437	3.23e-26	1.47e-24	EIF2B3	protein_coding	1	44850522	44986722	-1
ENSG00000087842	-0.582066	1.55e-25	6.85e-24	PIR	protein_coding	X	15384799	15493564	-1
ENSG00000120800	-0.595924	3.67e-25	1.59e-23	UTP20	protein_coding	12	101280109	101386616	1
ENSG00000198157	-0.630518	4.53e-25	1.95e-23	HMGN5	protein_coding	X	81113701	81201942	-1
ENSG00000114767	-0.720033	1.41e-24	5.95e-23	RRP9	protein_coding	3	51933430	51941941	-1
ENSG00000050405	-0.783753	3.5e-24	1.44e-22	LIMA1	protein_coding	12	50175788	50283546	-1
ENSG00000139515	-2.08757	1.66e-23	6.69e-22	PDX1	protein_coding	13	27920020	27926231	1
ENSG00000152580	-0.583181	2.18e-23	8.72e-22	IGSF10	protein_coding	3	151425384	151458709	-1
ENSG00000106460	-0.587977	2.58e-23	1.03e-21	TMEM106B	protein_coding	7	12211241	12243367	1
ENSG00000136933	-0.66244	6e-23	2.33e-21	RABEPK	protein_coding	9	125200542	125234158	1
ENSG00000162139	-0.871748	6.42e-23	2.48e-21	NEU3	protein_coding	11	74988134	75018893	1
ENSG00000096060	-0.733892	6.83e-22	2.53e-20	FKBP5	protein_coding	6	35573585	35728583	-1
ENSG00000160818	-0.609587	1.62e-21	5.88e-20	GPATCH4	protein_coding	1	156594487	156601496	-1
ENSG00000066926	-0.615215	4.67e-21	1.66e-19	FECH	protein_coding	18	57548283	57586772	-1
ENSG00000135114	-1.13515	8.47e-21	3e-19	OASL	protein_coding	12	121019111	121039242	-1
ENSG00000149218	-0.989028	1.82e-20	6.35e-19	ENDOD1	protein_coding	11	95089810	95132645	1
ENSG00000143416	-0.715729	2.42e-20	8.37e-19	SELENBP1	protein_coding	1	151364302	151372733	-1
ENSG00000185238	-0.608975	4.56e-20	1.56e-18	PRMT3	protein_coding	11	20387530	20509294	1
ENSG00000026559	-0.959619	6.8e-20	2.31e-18	KCNG1	protein_coding	20	51003656	51023129	-1
ENSG00000117228	-0.809088	2.64e-19	8.75e-18	GBP1	protein_coding	1	89052319	89065360	-1
ENSG00000174177	-0.86771	5.71e-19	1.85e-17	CTU2	protein_coding	16	88706463	88715386	1
ENSG00000185432	-1.28025	7.63e-19	2.44e-17	METTL7A	protein_coding	12	50923472	50932517	1
ENSG00000124588	-0.682793	1.34e-18	4.23e-17	NQO2	protein_coding	6	2987987	3028869	1
ENSG00000124126	-0.676144	1.54e-18	4.86e-17	PREX1	protein_coding	20	48624252	48827883	-1
ENSG00000166979	-0.81741	2.41e-18	7.53e-17	EVA1C	protein_coding	21	32412006	32515397	1
ENSG00000107833	-0.73619	2.56e-18	7.95e-17	NPM3	protein_coding	10	101781325	101783413	-1
ENSG00000103876	-0.755736	3.42e-18	1.05e-16	FAH	protein_coding	15	80152490	80186946	1
ENSG00000111875	-0.610807	6.38e-18	1.93e-16	ASF1A	protein_coding	6	118894220	118909167	1
ENSG00000152642	-0.603096	9.13e-18	2.73e-16	GPD1L	protein_coding	3	32105689	32168713	1
ENSG00000186603	-0.759403	3.7e-17	1.05e-15	HPDL	protein_coding	1	45326905	45328533	1
ENSG00000184675	-0.656942	4.44e-16	1.16e-14	AMER1	protein_coding	X	64185117	64205744	-1
ENSG00000166938	-0.622121	5.55e-16	1.44e-14	DIS3L	protein_coding	15	66293217	66333898	1
ENSG00000136444	-0.693976	2.78e-15	6.75e-14	RSAD1	protein_coding	17	50478800	50485975	1
ENSG00000140015	-0.818262	2.66e-14	6.08e-13	KCNH5	protein_coding	14	62699454	63102037	-1
ENSG00000118894	-0.676189	3.06e-14	6.98e-13	EEF2KMT	protein_coding	16	5084304	5097808	-1
ENSG00000104081	-0.750762	1.55e-13	3.29e-12	BMF	protein_coding	15	40087890	40108892	-1
ENSG00000163754	-0.69544	2.38e-13	4.93e-12	GYG1	protein_coding	3	148991341	149027668	1
ENSG00000137868	-1.31403	3.62e-13	7.36e-12	STRA6	protein_coding	15	74179466	74212267	-1
ENSG00000171227	-1.65855	3.8e-13	7.72e-12	TMEM37	protein_coding	2	119429901	119438520	1
ENSG00000204392	-0.595514	4.48e-13	9.01e-12	LSM2	protein_coding	6	31797396	31806984	-1
ENSG00000162878	-0.929705	1.67e-12	3.21e-11	PKDCC	protein_coding	2	42048020	42058528	1
ENSG00000166501	-1.23989	1.7e-12	3.26e-11	PRKCB	protein_coding	16	23835946	24220611	1
ENSG00000111671	-1.02262	2.45e-12	4.61e-11	SPSB2	protein_coding	12	6870935	6889358	-1
ENSG00000183605	-0.601174	2.45e-12	4.61e-11	SFXN4	protein_coding	10	119140767	119165667	-1
ENSG00000107672	-0.597556	8.87e-12	1.6e-10	NSMCE4A	protein_coding	10	121957088	121975217	-1
ENSG00000185745	-0.844719	9.2e-12	1.66e-10	IFIT1	protein_coding	10	89392546	89406486	1
ENSG00000129480	-0.753269	2.38e-11	4.1e-10	DTD2	protein_coding	14	31446036	31457510	-1
ENSG00000178537	-0.600489	3.24e-11	5.5e-10	SLC25A20	protein_coding	3	48856931	48898993	-1
ENSG00000019186	-1.31916	3.93e-11	6.6e-10	CYP24A1	protein_coding	20	54153449	54173973	-1
ENSG00000211459	-0.933228	3.93e-11	6.6e-10	MT-RNR1	Mt_rRNA	MT	648	1601	1
ENSG00000138347	-0.767448	4.21e-11	7.04e-10	MYPN	protein_coding	10	68106117	68212017	1
ENSG00000197147	-0.606092	5.06e-11	8.38e-10	LRRC8B	protein_coding	1	89524836	89597864	1
ENSG00000119922	-0.821926	5.62e-11	9.24e-10	IFIT2	protein_coding	10	89283694	89309276	1
ENSG00000118600	-0.726167	7.52e-11	1.21e-09	RXYLT1	protein_coding	12	63779803	63809558	1
ENSG00000163694	-0.916376	7.64e-11	1.23e-09	RBM47	protein_coding	4	40423267	40630875	-1
ENSG00000115738	-1.86283	8.05e-11	1.3e-09	ID2	protein_coding	2	8678845	8684453	1
ENSG00000139946	-0.612339	1.25e-10	1.97e-09	PELI2	protein_coding	14	56117814	56301526	1
ENSG00000151632	-0.941508	2.28e-10	3.48e-09	AKR1C2	protein_coding	10	4987400	5018031	-1
ENSG00000115844	-0.964551	2.8e-10	4.23e-09	DLX2	protein_coding	2	172099439	172102900	-1
ENSG00000168874	-1.24223	3.31e-10	4.97e-09	ATOH8	protein_coding	2	85751344	85788066	1
ENSG00000185070	-0.603956	3.62e-10	5.44e-09	FLRT2	protein_coding	14	85530144	85654426	1
ENSG00000169255	-0.631536	4.46e-10	6.61e-09	B3GALNT1	protein_coding	3	161083883	161105384	-1
ENSG00000168016	-0.708076	5.24e-10	7.67e-09	TRANK1	protein_coding	3	36826820	36945098	-1
ENSG00000163053	-0.972831	7.57e-10	1.09e-08	SLC16A14	protein_coding	2	230034974	230068999	-1
ENSG00000091129	-0.840599	7.53e-10	1.09e-08	NRCAM	protein_coding	7	108147623	108456717	-1
ENSG00000188620	-0.823641	9.45e-10	1.35e-08	HMX3	protein_coding	10	123135962	123137741	1
ENSG00000002746	-1.55689	1.13e-09	1.6e-08	HECW1	protein_coding	7	43112599	43566001	1
ENSG00000158050	-0.829382	1.41e-09	1.96e-08	DUSP2	protein_coding	2	96143166	96145440	-1
ENSG00000130347	-0.714511	1.71e-09	2.35e-08	RTN4IP1	protein_coding	6	106571971	106629487	-1
ENSG00000144355	-0.645402	1.9e-09	2.61e-08	DLX1	protein_coding	2	172084740	172089677	1
ENSG00000079257	-0.720924	2.26e-09	3.07e-08	LXN	protein_coding	3	158645822	158672693	-1
ENSG00000151131	-0.775027	2.87e-09	3.84e-08	C12orf45	protein_coding	12	104986310	105074197	1
ENSG00000158483	-0.639994	3.13e-09	4.16e-08	FAM86C1	protein_coding	11	71787510	71801236	1
ENSG00000123545	-0.608364	6.36e-09	8.13e-08	NDUFAF4	protein_coding	6	96889313	96897881	-1
ENSG00000006611	-1.33089	6.63e-09	8.46e-08	USH1C	protein_coding	11	17493895	17544416	-1
ENSG00000163132	-0.636022	7.36e-09	9.34e-08	MSX1	protein_coding	4	4859666	4863936	1
ENSG00000165238	-0.603007	7.59e-09	9.62e-08	WNK2	protein_coding	9	93184916	93320572	1
ENSG00000168661	-1.30944	2.48e-08	2.95e-07	ZNF30	protein_coding	19	34926903	34945170	1
ENSG00000143341	-1.63893	4.23e-08	4.83e-07	HMCN1	protein_coding	1	185734551	186190949	1
ENSG00000196981	-0.955729	4.95e-08	5.59e-07	WDR5B	protein_coding	3	122412332	122416051	-1
ENSG00000272711	-1.08358	5.17e-08	5.81e-07	AC019069.1	lincRNA	2	74832655	74833987	-1
ENSG00000107796	-0.681516	5.35e-08	5.99e-07	ACTA2	protein_coding	10	88935074	88991339	-1
ENSG00000152932	-1.46918	7.01e-08	7.75e-07	RAB3C	protein_coding	5	58582221	58859394	1
ENSG00000177432	-0.687563	7.88e-08	8.64e-07	NAP1L5	protein_coding	4	88695915	88697829	-1
ENSG00000215386	-0.726247	7.96e-08	8.73e-07	MIR99AHG	lincRNA	21	15928296	16645065	1
ENSG00000261373	-0.699969	8.49e-08	9.25e-07	VPS9D1-AS1	antisense	16	89711856	89718165	1
ENSG00000129514	-0.642308	8.65e-08	9.42e-07	FOXA1	protein_coding	14	37589984	37596059	-1
ENSG00000196177	-0.755488	1.07e-07	1.15e-06	ACADSB	protein_coding	10	123008979	123058311	1
ENSG00000169083	-0.626988	1.78e-07	1.86e-06	AR	protein_coding	X	67544032	67730619	1
ENSG00000103351	-0.651692	1.8e-07	1.88e-06	CLUAP1	protein_coding	16	3500924	3539048	1
ENSG00000068079	-0.626525	2.19e-07	2.26e-06	IFI35	protein_coding	17	43006725	43014456	1
ENSG00000187210	-0.668396	2.5e-07	2.57e-06	GCNT1	protein_coding	9	76419850	76651203	1
ENSG00000172403	-1.05313	4.11e-07	4.04e-06	SYNPO2	protein_coding	4	118850688	119061247	1
ENSG00000124243	-0.659315	5.33e-07	5.12e-06	BCAS4	protein_coding	20	50794894	50882676	1
ENSG00000235109	-0.67179	5.56e-07	5.33e-06	ZSCAN31	protein_coding	6	28324693	28356271	-1
ENSG00000135119	-0.682978	7.7e-07	7.21e-06	RNFT2	protein_coding	12	116738178	116853631	1
ENSG00000111490	-0.624775	8.43e-07	7.84e-06	TBC1D30	protein_coding	12	64780516	64881032	1
ENSG00000146166	-1.79606	8.83e-07	8.17e-06	LGSN	protein_coding	6	63275951	63319977	-1
ENSG00000138642	-0.685259	1e-06	9.15e-06	HERC6	protein_coding	4	88378739	88443111	1
ENSG00000229619	-0.641567	1.16e-06	1.05e-05	MBNL1-AS1	antisense	3	152262616	152269555	-1
ENSG00000154188	-0.745655	1.19e-06	1.07e-05	ANGPT1	protein_coding	8	107249482	107498055	-1
ENSG00000134376	-0.704325	1.31e-06	1.17e-05	CRB1	protein_coding	1	197268204	197478455	1
ENSG00000171160	-0.950171	1.35e-06	1.2e-05	MORN4	protein_coding	10	97614553	97633500	-1
ENSG00000265763	-1.19639	1.79e-06	1.55e-05	ZNF488	protein_coding	10	47365496	47384273	-1
ENSG00000158528	-0.603251	1.93e-06	1.67e-05	PPP1R9A	protein_coding	7	94907202	95296415	1
ENSG00000240065	-1.24542	2.28e-06	1.94e-05	PSMB9	protein_coding	6	32844136	32859585	1
ENSG00000134780	-0.599872	2.35e-06	1.99e-05	DAGLA	protein_coding	11	61680433	61747001	1
ENSG00000223764	-0.612929	2.48e-06	2.09e-05	LINC02593	lincRNA	1	916865	921016	-1
ENSG00000145087	-0.990983	2.67e-06	2.23e-05	STXBP5L	protein_coding	3	120908072	121424761	1
ENSG00000185477	-0.673322	3.04e-06	2.5e-05	GPRIN3	protein_coding	4	89236386	89308010	-1
ENSG00000100490	-0.783018	3.23e-06	2.65e-05	CDKL1	protein_coding	14	50329404	50416461	-1
ENSG00000151338	-0.688813	4.31e-06	3.45e-05	MIPOL1	protein_coding	14	37197913	37552361	1
ENSG00000110844	-0.765651	5.22e-06	4.12e-05	PRPF40B	protein_coding	12	49568218	49644666	1
ENSG00000233429	-0.86976	5.83e-06	4.57e-05	HOTAIRM1	antisense	7	27095647	27100265	1
ENSG00000090376	-0.754364	6.06e-06	4.73e-05	IRAK3	protein_coding	12	66188879	66254622	1
ENSG00000171084	-0.880971	6.46e-06	5e-05	FAM86JP	transcribed_unprocessed_pseudogene	3	125916620	125930024	1
ENSG00000196196	-0.79987	7.23e-06	5.53e-05	HRCT1	protein_coding	9	35906192	35907141	1
ENSG00000179750	-0.831244	9.94e-06	7.37e-05	APOBEC3B	protein_coding	22	38982347	38992804	1
ENSG00000101096	-0.655534	1.11e-05	8.19e-05	NFATC2	protein_coding	20	51386957	51562831	-1
ENSG00000205707	-0.582542	1.18e-05	8.61e-05	ETFRF1	protein_coding	12	25195216	25209645	1
ENSG00000160145	-0.935351	1.52e-05	0.000108928	KALRN	protein_coding	3	124080023	124726325	1
ENSG00000164342	-0.789451	1.54e-05	0.000110745	TLR3	protein_coding	4	186069152	186088069	1
ENSG00000164318	-1.09383	1.91e-05	0.000134379	EGFLAM	protein_coding	5	38258409	38465021	1
ENSG00000036672	-0.980154	2.15e-05	0.000149779	USP2	protein_coding	11	119355215	119381726	-1
ENSG00000198673	-0.783789	2.42e-05	0.000166265	FAM19A2	protein_coding	12	61708259	62279150	-1
ENSG00000102935	-0.743936	2.56e-05	0.000174933	ZNF423	protein_coding	16	49487524	49857919	-1
ENSG00000160172	-0.621566	2.76e-05	0.00018695	FAM86C2P	transcribed_unprocessed_pseudogene	11	67791648	67805336	-1
ENSG00000198695	-1.02313	2.84e-05	0.000191935	MT-ND6	protein_coding	MT	14149	14673	-1
ENSG00000103021	-0.588211	2.89e-05	0.000195145	CCDC113	protein_coding	16	58231157	58283836	1
ENSG00000210082	-0.609016	3.43e-05	0.000228077	MT-RNR2	Mt_rRNA	MT	1671	3229	1
ENSG00000120832	-0.613153	3.46e-05	0.000229551	MTERF2	protein_coding	12	106977291	106987166	-1
ENSG00000187689	-0.82295	3.84e-05	0.000253602	AMTN	protein_coding	4	70518540	70532742	1
ENSG00000115896	-0.720629	4.19e-05	0.000273745	PLCL1	protein_coding	2	197804702	198572581	1
ENSG00000210112	-2.1408	4.6e-05	0.000298487	MT-TM	Mt_tRNA	MT	4402	4469	1
ENSG00000178700	-0.606728	4.86e-05	0.000313655	DHFR2	protein_coding	3	94047836	94063389	-1
ENSG00000215068	-0.601648	5.01e-05	0.000322901	AC025171.2	antisense	5	43041575	43045390	1
ENSG00000104140	-0.969114	5.16e-05	0.000331127	RHOV	protein_coding	15	40872214	40874289	-1
ENSG00000125772	-0.602237	5.64e-05	0.000358732	GPCPD1	protein_coding	20	5544404	5611026	-1
ENSG00000166896	-0.739753	6.14e-05	0.000387054	ATP23	protein_coding	12	57906039	57959148	1
ENSG00000006071	-1.12895	6.89e-05	0.000429692	ABCC8	protein_coding	11	17392498	17476879	-1
ENSG00000137752	-0.918025	6.99e-05	0.000435697	CASP1	protein_coding	11	105025443	105035250	-1
ENSG00000150556	-0.773107	7.29e-05	0.000452985	LYPD6B	protein_coding	2	149038107	149215262	1
ENSG00000209082	-0.753765	8.15e-05	0.000502167	MT-TL1	Mt_tRNA	MT	3230	3304	1
ENSG00000164089	-0.808299	8.31e-05	0.000510398	ETNPPL	protein_coding	4	108742040	108763054	-1
ENSG00000146243	-0.695842	0.000110891	0.000661506	IRAK1BP1	protein_coding	6	78867472	78946440	1
ENSG00000007237	-1.17052	0.000119318	0.000708237	GAS7	protein_coding	17	9910609	10198551	-1
ENSG00000215182	-2.45713	0.000122203	0.000724004	MUC5AC	protein_coding	11	1157953	1201138	1
ENSG00000269028	-0.667962	0.000142518	0.000826505	MTRNR2L12	protein_coding	3	96617188	96618236	-1
ENSG00000168772	-0.915258	0.000160917	0.000921274	CXXC4	protein_coding	4	104468312	104494901	-1
ENSG00000157657	-0.608206	0.000160866	0.000921274	ZNF618	protein_coding	9	113876282	114056591	1
ENSG00000166669	-0.961138	0.000171436	0.000974028	ATF7IP2	protein_coding	16	10326434	10483638	1
ENSG00000168280	-0.731462	0.000190377	0.00107111	KIF5C	protein_coding	2	148875250	149026759	1
ENSG00000164920	-0.705598	0.000197424	0.0011059	OSR2	protein_coding	8	98944403	98952104	1
ENSG00000197044	-0.75321	0.000211923	0.00117929	ZNF441	protein_coding	19	11767000	11784078	1
ENSG00000142149	-0.714021	0.00022653	0.00125094	HUNK	protein_coding	21	31873315	32044633	1
ENSG00000253552	-1.1835	0.000240268	0.00132182	HOXA-AS2	antisense	7	27107777	27134302	1
ENSG00000203883	-0.941718	0.000248629	0.00136331	SOX18	protein_coding	20	64047582	64049641	-1
ENSG00000017427	-0.710095	0.000251043	0.00137529	IGF1	protein_coding	12	102395874	102481744	-1
ENSG00000210194	-1.14848	0.000271	0.00147068	MT-TE	Mt_tRNA	MT	14674	14742	-1
ENSG00000156475	-0.602873	0.000291091	0.00156924	PPP2R2B	protein_coding	5	146581146	147084784	-1
ENSG00000256433	-0.768572	0.00031842	0.00169969	AC005840.2	lincRNA	12	6393905	6396148	1
ENSG00000125434	-0.675109	0.000327799	0.0017456	SLC25A35	protein_coding	17	8287763	8295343	-1
ENSG00000227403	-0.758648	0.000343075	0.00181937	LINC01806	lincRNA	2	161244739	161249050	1
ENSG00000078687	-0.725949	0.000349684	0.0018495	TNRC6C	protein_coding	17	77959240	78108835	1
ENSG00000105991	-1.87373	0.000409451	0.0021281	HOXA1	protein_coding	7	27092993	27095996	-1
ENSG00000132000	-0.677172	0.000522044	0.00264103	PODNL1	protein_coding	19	13931187	13953392	-1
ENSG00000009950	-0.716126	0.000545742	0.00274541	MLXIPL	protein_coding	7	73593194	73624543	-1
ENSG00000099256	-0.805884	0.00056743	0.00284016	PRTFDC1	protein_coding	10	24848607	24952604	-1
ENSG00000137975	-1.39689	0.00057667	0.00287997	CLCA2	protein_coding	1	86424086	86456558	1
ENSG00000237523	-0.604596	0.000585941	0.0029222	LINC00857	lincRNA	10	80207710	80219657	1
ENSG00000141337	-0.602474	0.000599673	0.00298239	ARSG	protein_coding	17	68259182	68422731	1
ENSG00000062282	-0.638655	0.000632806	0.00312806	DGAT2	protein_coding	11	75759512	75801535	1
ENSG00000170293	-0.618397	0.000638472	0.00315346	CMTM8	protein_coding	3	32238679	32370325	1
ENSG00000105711	-0.58711	0.000720973	0.00351495	SCN1B	protein_coding	19	35030466	35040449	1
ENSG00000139410	-0.594712	0.000879025	0.00420252	SDSL	protein_coding	12	113422237	113438276	1
ENSG00000067601	-0.962428	0.000972739	0.00459174	PMS2P4	transcribed_unprocessed_pseudogene	7	67295608	67302907	-1
ENSG00000198691	-0.78319	0.0011214	0.00520166	ABCA4	protein_coding	1	93992835	94121132	-1
ENSG00000198074	-0.890888	0.00139201	0.00630345	AKR1B10	protein_coding	7	134527592	134541408	1
ENSG00000006377	-0.625343	0.00152211	0.00680954	DLX6	protein_coding	7	97005548	97011039	1
ENSG00000187486	-1.04598	0.00164667	0.00726278	KCNJ11	protein_coding	11	17385859	17389331	-1
ENSG00000203872	-1.82697	0.00180054	0.00785556	C6orf163	protein_coding	6	87344849	87365463	1
ENSG00000113790	-0.647901	0.0018525	0.00805674	EHHADH	protein_coding	3	185190624	185281990	-1
ENSG00000225630	-0.597916	0.00209747	0.00899691	MTND2P28	unprocessed_pseudogene	1	629640	630683	1
ENSG00000204934	-0.632774	0.00229796	0.00977343	ATP6V0E2-AS1	antisense	7	149867697	149880610	-1
ENSG00000144712	-1.28703	0.00231286	0.00982281	CAND2	protein_coding	3	12796472	12871916	1
ENSG00000130475	-0.635599	0.00246781	0.0103776	FCHO1	protein_coding	19	17747718	17788568	1
ENSG00000163596	-0.847261	0.00258333	0.0108118	ICA1L	protein_coding	2	202773150	202871985	-1
ENSG00000118432	-1.06737	0.00266513	0.0111031	CNR1	protein_coding	6	88139864	88166359	-1
ENSG00000107165	-0.921489	0.0027962	0.0115631	TYRP1	protein_coding	9	12685439	12710290	1
ENSG00000105997	-0.741667	0.00282114	0.01165	HOXA3	protein_coding	7	27106184	27152581	-1
ENSG00000251131	-0.792616	0.00360233	0.0143469	AC025171.3	antisense	5	43018429	43024247	1
ENSG00000170439	-0.618731	0.00368796	0.0146618	METTL7B	protein_coding	12	55681546	55684611	1
ENSG00000269921	-1.71388	0.00407401	0.0159454	AC068620.1	lincRNA	4	56387625	56388153	1
ENSG00000140795	-0.79729	0.00422269	0.0164268	MYLK3	protein_coding	16	46703369	46790407	-1
ENSG00000198208	-1.40305	0.00426089	0.0165502	RPS6KL1	protein_coding	14	74903954	74923396	-1
ENSG00000260947	-0.764641	0.00430176	0.0166981	AL356489.2	lincRNA	9	33697459	33700986	1
ENSG00000245248	-0.824664	0.0043348	0.0167977	USP2-AS1	antisense	11	119381778	119526664	1
ENSG00000179772	-0.767823	0.0046262	0.0177422	FOXS1	protein_coding	20	31844301	31845619	-1
ENSG00000101306	-0.907089	0.00507516	0.0192213	MYLK2	protein_coding	20	31819308	31834689	1
ENSG00000158246	-0.63506	0.00526335	0.0198793	TENT5B	protein_coding	1	27005020	27012836	-1
ENSG00000263843	-0.581249	0.00541538	0.0203805	AC022211.2	antisense	17	75271369	75273895	1
ENSG00000170442	-0.59621	0.00543244	0.0204404	KRT86	protein_coding	12	52249300	52309163	1
ENSG00000280987	-0.580111	0.00557435	0.0208997	MATR3	protein_coding	5	139273752	139331671	1
ENSG00000181804	-0.654421	0.00647139	0.0237747	SLC9A9	protein_coding	3	143265222	143848531	-1
ENSG00000150636	-0.870504	0.00658303	0.0241113	CCDC102B	protein_coding	18	68715209	69055189	1
ENSG00000079435	-0.796089	0.00730526	0.0263313	LIPE	protein_coding	19	42401507	42427426	-1
ENSG00000257588	-0.956391	0.00818299	0.0289475	AC025154.2	antisense	12	49951512	49962924	-1
ENSG00000047617	-0.927492	0.00822449	0.0290713	ANO2	protein_coding	12	5531869	5946232	-1
ENSG00000188385	-0.704816	0.0082751	0.0292271	JAKMIP3	protein_coding	10	132104671	132184809	1
ENSG00000173269	-0.605298	0.00843131	0.0296794	MMRN2	protein_coding	10	86935540	86969481	-1
ENSG00000123838	-0.76574	0.00865306	0.0303408	C4BPA	protein_coding	1	207104262	207144972	1
ENSG00000174473	-0.731697	0.00913195	0.0317465	GALNTL6	protein_coding	4	171812254	173041559	1
ENSG00000102359	-0.650674	0.0101327	0.0346076	SRPX2	protein_coding	X	100644166	100675788	1
ENSG00000121236	-0.603851	0.0101819	0.0347227	TRIM6	protein_coding	11	5596109	5612958	1
ENSG00000187037	-0.658502	0.0114357	0.0383271	GPR141	protein_coding	7	37683796	37833788	1
ENSG00000234779	-0.690843	0.0116127	0.0387969	BNC2-AS1	antisense	9	16726814	16727524	1
ENSG00000145002	-0.732257	0.0123233	0.0408361	FAM86B2	protein_coding	8	12425614	12436343	-1
ENSG00000163485	-0.711452	0.0132676	0.043443	ADORA1	protein_coding	1	203090654	203167405	1
ENSG00000168734	-0.589057	0.013388	0.0437331	PKIG	protein_coding	20	44531785	44624247	1

## Sheet: a549 24h_up
ensembl_gene_id	log2FoldChange	pvalue	FDR	external_gene_name	gene_biotype	chromosome_name	start_position	end_position	strand
ENSG00000104765	2.23296	4.36e-275	7.71e-271	BNIP3L	protein_coding	8	26382898	26505636	1
ENSG00000102144	1.91218	1.07e-213	9.52e-210	PGK1	protein_coding	X	77910739	78129296	1
ENSG00000159399	2.66632	2.22e-211	1.31e-207	HK2	protein_coding	2	74833981	74893359	1
ENSG00000170525	1.8174	1.55e-209	6.86e-206	PFKFB3	protein_coding	10	6144934	6254644	1
ENSG00000111674	2.41675	7.76e-209	2.75e-205	ENO2	protein_coding	12	6913745	6923698	1
ENSG00000146674	4.0163	6.35e-204	1.87e-200	IGFBP3	protein_coding	7	45912245	45921874	-1
ENSG00000146678	4.31687	3.7e-178	9.37e-175	IGFBP1	protein_coding	7	45888357	45893668	1
ENSG00000176171	2.03542	1.7e-176	3.76e-173	BNIP3	protein_coding	10	131966455	131982013	-1
ENSG00000117394	2.19554	7.68e-175	1.51e-171	SLC2A1	protein_coding	1	42925375	42959176	-1
ENSG00000148926	2.74866	2.29e-173	4.06e-170	ADM	protein_coding	11	10304680	10307397	1
ENSG00000249992	2.81812	3e-172	4.82e-169	TMEM158	protein_coding	3	45224466	45226278	-1
ENSG00000183018	3.2155	2.61e-168	3.85e-165	SPNS2	protein_coding	17	4498838	4539035	1
ENSG00000143847	4.63089	5.44e-160	7.42e-157	PPFIA4	protein_coding	1	203026498	203078740	1
ENSG00000113739	2.41507	2.07e-158	2.44e-155	STC2	protein_coding	5	173314713	173329503	-1
ENSG00000162433	1.91016	1.94e-158	2.44e-155	AK4	protein_coding	1	65147549	65232145	1
ENSG00000164442	2.30872	1.96e-147	2.17e-144	CITED2	protein_coding	6	139371807	139374620	-1
ENSG00000129521	2.48655	1.02e-144	1.06e-141	EGLN3	protein_coding	14	33924231	34462774	-1
ENSG00000116285	2.46826	1.62e-143	1.6e-140	ERRFI1	protein_coding	1	8004404	8026308	-1
ENSG00000113369	1.93228	1.01e-138	9.45e-136	ARRDC3	protein_coding	5	91368724	91383359	-1
ENSG00000197930	1.41457	9.28e-131	8.22e-128	ERO1A	protein_coding	14	52639916	52695900	-1
ENSG00000171246	3.1529	4.77e-129	4.02e-126	NPTX1	protein_coding	17	80467148	80477843	-1
ENSG00000113083	4.6337	2.6e-125	2.1e-122	LOX	protein_coding	5	122063195	122078360	-1
ENSG00000134107	1.99576	2.25e-124	1.73e-121	BHLHE40	protein_coding	3	4979116	4985323	1
ENSG00000114268	2.89673	1.43e-123	1.05e-120	PFKFB4	protein_coding	3	48517684	48562015	-1
ENSG00000134333	1.30463	3.16e-122	2.24e-119	LDHA	protein_coding	11	18394388	18408425	1
ENSG00000125629	2.07303	1.18e-121	8.07e-119	INSIG2	protein_coding	2	118088452	118110997	1
ENSG00000107159	6.14532	1.3e-117	8.55e-115	CA9	protein_coding	9	35673856	35681159	1
ENSG00000186480	1.54968	1.98e-117	1.25e-114	INSIG1	protein_coding	7	155297776	155310235	1
ENSG00000120129	1.54794	2.68e-108	1.64e-105	DUSP1	protein_coding	5	172768090	172771195	-1
ENSG00000213626	3.19035	2.79e-107	1.65e-104	LBH	protein_coding	2	30231369	30323730	1
ENSG00000104812	1.59706	3.48e-107	1.99e-104	GYS1	protein_coding	19	48968125	48993310	-1
ENSG00000173727	2.47692	9.44e-103	5.23e-100	AP000769.1	transcribed_unprocessed_pseudogene	11	65455258	65466720	1
ENSG00000115548	1.4287	1.69e-98	9.09e-96	KDM3A	protein_coding	2	86440647	86492716	1
ENSG00000128242	3.57035	5.5e-96	2.87e-93	GAL3ST1	protein_coding	22	30554635	30574587	-1
ENSG00000123384	2.24212	2.05e-94	1.04e-91	LRP1	protein_coding	12	57128493	57213351	1
ENSG00000145730	1.77987	2.85e-94	1.4e-91	PAM	protein_coding	5	102753981	103031105	1
ENSG00000219607	3.24873	2.32e-91	1.11e-88	PPP1R3G	protein_coding	6	5084581	5089487	1
ENSG00000114480	1.29585	1.17e-90	5.46e-88	GBE1	protein_coding	3	81489699	81762161	-1
ENSG00000177181	2.17673	3.84e-85	1.74e-82	RIMKLA	protein_coding	1	42380795	42422578	1
ENSG00000095303	2.59282	1.42e-82	6.3e-80	PTGS1	protein_coding	9	122370530	122395703	1
ENSG00000105220	1.10072	6.41e-80	2.77e-77	GPI	protein_coding	19	34359480	34402413	1
ENSG00000173281	1.90358	1.51e-78	6.38e-76	PPP1R3B	protein_coding	8	9136255	9151574	-1
ENSG00000105877	4.21603	7.6e-78	3.13e-75	DNAH11	protein_coding	7	21543215	21901839	1
ENSG00000147852	1.28777	1.2e-77	4.83e-75	VLDLR	protein_coding	9	2621834	2660053	1
ENSG00000119938	2.01041	1.64e-77	6.47e-75	PPP1R3C	protein_coding	10	91628442	91633054	-1
ENSG00000181458	3.52327	4.11e-77	1.58e-74	TMEM45A	protein_coding	3	100492619	100577444	1
ENSG00000013588	1.32905	2.54e-76	9.59e-74	GPRC5A	protein_coding	12	12890782	12917937	1
ENSG00000247095	3.30671	3.7e-75	1.37e-72	MIR210HG	lincRNA	11	565660	568457	-1
ENSG00000213859	2.02185	4.08e-75	1.48e-72	KCTD11	protein_coding	17	7351889	7354944	1
ENSG00000162591	1.50341	7.15e-74	2.53e-71	MEGF6	protein_coding	1	3489920	3611495	-1
ENSG00000104419	4.61751	1.15e-73	4e-71	NDRG1	protein_coding	8	133237171	133302022	-1
ENSG00000072682	1.65373	4.84e-73	1.65e-70	P4HA2	protein_coding	5	132191838	132295315	-1
ENSG00000152952	1.26858	8.51e-73	2.84e-70	PLOD2	protein_coding	3	146069440	146163653	-1
ENSG00000185950	1.69302	8.67e-73	2.85e-70	IRS2	protein_coding	13	109752698	109786568	-1
ENSG00000112715	1.85165	1.09e-72	3.51e-70	VEGFA	protein_coding	6	43770184	43786487	1
ENSG00000177606	1.9073	5.16e-70	1.63e-67	JUN	protein_coding	1	58780788	58784327	-1
ENSG00000147872	2.42386	1.03e-69	3.21e-67	PLIN2	protein_coding	9	19108375	19149290	-1
ENSG00000109107	3.17711	1.28e-68	3.92e-66	ALDOC	protein_coding	17	28573115	28577264	-1
ENSG00000204531	2.8599	1.76e-68	5.27e-66	POU5F1	protein_coding	6	31164337	31180731	-1
ENSG00000101236	1.75435	5.29e-68	1.56e-65	RNF24	protein_coding	20	3927309	4015582	-1
ENSG00000152256	2.18111	2.46e-67	7.03e-65	PDK1	protein_coding	2	172555373	172608669	1
ENSG00000100342	1.7486	1.11e-66	3.07e-64	APOL1	protein_coding	22	36253010	36267530	1
ENSG00000119950	1.55037	2.61e-66	7.11e-64	MXI1	protein_coding	10	110207605	110287365	1
ENSG00000118263	1.95856	5.12e-66	1.37e-63	KLF7	protein_coding	2	207074137	207167267	-1
ENSG00000133639	1.93026	4.38e-65	1.16e-62	BTG1	protein_coding	12	92140278	92145897	-1
ENSG00000074416	1.24511	1.19e-64	3.1e-62	MGLL	protein_coding	3	127689062	128052190	-1
ENSG00000164096	1.39689	4.16e-64	1.07e-61	C4orf3	protein_coding	4	119296419	119304445	-1
ENSG00000167772	4.7781	6.08e-64	1.52e-61	ANGPTL4	protein_coding	19	8363289	8374373	1
ENSG00000116260	0.984532	6.09e-64	1.52e-61	QSOX1	protein_coding	1	180154834	180204030	1
ENSG00000168209	1.69832	1.49e-62	3.66e-60	DDIT4	protein_coding	10	72273920	72276036	1
ENSG00000140939	1.29835	1.27e-61	3.07e-59	NOL3	protein_coding	16	67170154	67175735	1
ENSG00000169174	1.3414	4.62e-61	1.11e-58	PCSK9	protein_coding	1	55039548	55064852	1
ENSG00000141526	1.1754	5.73e-61	1.35e-58	SLC16A3	protein_coding	17	82228397	82261129	1
ENSG00000101255	1.44136	9.84e-61	2.29e-58	TRIB3	protein_coding	20	362835	397559	1
ENSG00000156515	1.2218	1.84e-60	4.23e-58	HK1	protein_coding	10	69269984	69401884	1
ENSG00000196968	1.33264	2.16e-59	4.91e-57	FUT11	protein_coding	10	73772291	73780251	1
ENSG00000198517	2.10573	7.65e-59	1.72e-56	MAFK	protein_coding	7	1530714	1543043	1
ENSG00000107819	1.1524	2.42e-58	5.36e-56	SFXN3	protein_coding	10	101031234	101041244	1
ENSG00000150995	1.46983	2.09e-57	4.58e-55	ITPR1	protein_coding	3	4493345	4847840	1
ENSG00000127663	1.46882	3.41e-57	7.38e-55	KDM4B	protein_coding	19	4969113	5153595	1
ENSG00000141458	0.952268	3.52e-57	7.5e-55	NPC1	protein_coding	18	23506184	23586898	-1
ENSG00000165757	0.944354	3.71e-57	7.82e-55	JCAD	protein_coding	10	30012800	30115494	-1
ENSG00000157514	1.99681	6.93e-57	1.44e-54	TSC22D3	protein_coding	X	107713221	107777342	-1
ENSG00000117525	2.37197	9.11e-56	1.88e-53	F3	protein_coding	1	94529225	94541800	-1
ENSG00000134324	0.917067	1.89e-55	3.85e-53	LPIN1	protein_coding	2	11677595	11827409	1
ENSG00000131668	1.54481	3.46e-55	6.96e-53	BARX1	protein_coding	9	93951622	93955372	-1
ENSG00000265972	3.08338	5.75e-55	1.14e-52	TXNIP	protein_coding	1	145992435	145996600	-1
ENSG00000122884	1.81561	6.78e-55	1.33e-52	P4HA1	protein_coding	10	73007217	73096974	-1
ENSG00000069667	2.77986	3.76e-54	7.32e-52	RORA	protein_coding	15	60488284	61229319	-1
ENSG00000118985	1.38182	1.06e-53	2.05e-51	ELL2	protein_coding	5	95885098	95962071	-1
ENSG00000138764	2.10891	1.23e-53	2.33e-51	CCNG2	protein_coding	4	77157151	77433388	1
ENSG00000163814	1.6626	3.33e-53	6.27e-51	CDCP1	protein_coding	3	45082278	45146422	-1
ENSG00000173227	1.55797	1.58e-52	2.95e-50	SYT12	protein_coding	11	67006778	67050863	1
ENSG00000128335	1.36851	1.74e-51	3.21e-49	APOL2	protein_coding	22	36226203	36239954	-1
ENSG00000165030	1.61101	2.52e-51	4.6e-49	NFIL3	protein_coding	9	91409045	91423862	-1
ENSG00000160213	1.07881	7.27e-51	1.31e-48	CSTB	protein_coding	21	43772511	43776445	-1
ENSG00000196730	1.27238	1.02e-50	1.82e-48	DAPK1	protein_coding	9	87497228	87708633	1
ENSG00000134013	1.86785	1.73e-50	3.06e-48	LOXL2	protein_coding	8	23297189	23425328	-1
ENSG00000166833	1.19771	1.46e-49	2.54e-47	NAV2	protein_coding	11	19350724	20121598	1
ENSG00000131759	1.11462	1.09e-48	1.88e-46	RARA	protein_coding	17	40309192	40357643	1
ENSG00000196159	1.39943	5.89e-48	1e-45	FAT4	protein_coding	4	125316399	125492932	1
ENSG00000034510	0.888453	1.4e-47	2.37e-45	TMSB10	protein_coding	2	84905625	84906675	1
ENSG00000109046	0.96227	2.33e-47	3.89e-45	WSB1	protein_coding	17	27294076	27315926	1
ENSG00000111669	0.808426	7.12e-47	1.18e-44	TPI1	protein_coding	12	6867119	6870948	1
ENSG00000064205	3.91295	8.05e-46	1.32e-43	WISP2	protein_coding	20	44714844	44728509	1
ENSG00000131094	1.64645	1.6e-45	2.61e-43	C1QL1	protein_coding	17	44959693	44968071	-1
ENSG00000169499	1.2005	2.19e-45	3.49e-43	PLEKHA2	protein_coding	8	38901235	38973909	1
ENSG00000065809	0.99223	2.19e-45	3.49e-43	FAM107B	protein_coding	10	14518557	14774897	-1
ENSG00000052802	0.94705	4.04e-45	6.33e-43	MSMO1	protein_coding	4	165327623	165343160	1
ENSG00000187193	2.653	1.52e-44	2.37e-42	MT1X	protein_coding	16	56682424	56684196	1
ENSG00000170955	1.05307	4.74e-44	7.29e-42	CAVIN3	protein_coding	11	6318946	6320647	-1
ENSG00000143384	0.941255	7.68e-44	1.17e-41	MCL1	protein_coding	1	150574551	150579738	-1
ENSG00000185033	1.50284	8.28e-44	1.25e-41	SEMA4B	protein_coding	15	90160604	90229679	1
ENSG00000198910	1.78005	1.71e-43	2.53e-41	L1CAM	protein_coding	X	153861514	153886174	-1
ENSG00000182378	0.838811	2.89e-43	4.23e-41	PLCXD1	protein_coding	X	276322	303356	1
ENSG00000159216	1.11873	4.17e-43	6.05e-41	RUNX1	protein_coding	21	34787801	36004667	-1
ENSG00000153395	1.42604	6.38e-43	9.19e-41	LPCAT1	protein_coding	5	1456480	1523977	-1
ENSG00000137145	0.986284	8.5e-43	1.21e-40	DENND4C	protein_coding	9	19230435	19373545	1
ENSG00000166165	1.01963	9.36e-43	1.33e-40	CKB	protein_coding	14	103519659	103523111	-1
ENSG00000159167	3.63004	1.05e-42	1.48e-40	STC1	protein_coding	8	23841915	23854807	-1
ENSG00000173548	1.30417	1.29e-42	1.8e-40	SNX33	protein_coding	15	75647906	75662301	1
ENSG00000171345	1.78768	2.06e-42	2.85e-40	KRT19	protein_coding	17	41523617	41528308	-1
ENSG00000067057	0.813031	2.48e-42	3.41e-40	PFKP	protein_coding	10	3066333	3137712	1
ENSG00000067082	1.38297	4.48e-42	6.1e-40	KLF6	protein_coding	10	3775996	3785281	-1
ENSG00000145901	1.03449	7.37e-42	9.96e-40	TNIP1	protein_coding	5	151029945	151093577	-1
ENSG00000101040	1.03274	3.32e-41	4.43e-39	ZMYND8	protein_coding	20	47209214	47356889	-1
ENSG00000188994	1.02154	6.32e-41	8.36e-39	ZNF292	protein_coding	6	87152833	87264196	1
ENSG00000110852	2.24826	9.91e-41	1.3e-38	CLEC2B	protein_coding	12	9852984	9870136	-1
ENSG00000131389	1.22901	1.06e-40	1.38e-38	SLC6A6	protein_coding	3	14402576	14489349	1
ENSG00000126804	1.18727	2.3e-40	2.98e-38	ZBTB1	protein_coding	14	64503712	64533690	1
ENSG00000214193	1.70795	3.08e-40	3.96e-38	SH3D21	protein_coding	1	36306387	36324886	1
ENSG00000175105	1.23797	6.73e-40	8.58e-38	ZNF654	protein_coding	3	88059274	88144665	1
ENSG00000135245	1.53332	1.25e-39	1.58e-37	HILPDA	protein_coding	7	128455849	128458418	1
ENSG00000177119	0.876576	2.29e-39	2.88e-37	ANO6	protein_coding	12	45215987	45440404	1
ENSG00000186918	1.16802	2.48e-39	3.09e-37	ZNF395	protein_coding	8	28345585	28402701	-1
ENSG00000132432	0.904864	3.36e-39	4.17e-37	SEC61G	protein_coding	7	54752250	54759974	-1
ENSG00000170006	1.76789	1.01e-38	1.25e-36	TMEM154	protein_coding	4	152618632	152680165	-1
ENSG00000204528	3.1202	1.69e-38	2.05e-36	PSORS1C3	sense_intronic	6	31173735	31177899	-1
ENSG00000189060	1.13458	1.88e-38	2.27e-36	H1F0	protein_coding	22	37805093	37807436	1
ENSG00000148082	1.01934	2.71e-38	3.24e-36	SHC3	protein_coding	9	89005771	89178767	-1
ENSG00000178150	1.87587	3.81e-38	4.53e-36	ZNF114	protein_coding	19	48270102	48287608	1
ENSG00000111700	1.35553	5.64e-38	6.66e-36	SLCO1B3	protein_coding	12	20810702	20916911	1
ENSG00000115107	0.923115	2.29e-37	2.68e-35	STEAP3	protein_coding	2	119223831	119265652	1
ENSG00000163516	1.32452	3.15e-37	3.67e-35	ANKZF1	protein_coding	2	219229757	219236669	1
ENSG00000119408	0.883599	4.81e-37	5.57e-35	NEK6	protein_coding	9	124257606	124353307	1
ENSG00000161958	3.93156	9.13e-37	1.04e-34	FGF11	protein_coding	17	7438273	7444937	1
ENSG00000164211	1.24381	1.31e-36	1.49e-34	STARD4	protein_coding	5	111496033	111512590	-1
ENSG00000158406	2.09063	1.35e-36	1.53e-34	HIST1H4H	protein_coding	6	26277609	26285638	-1
ENSG00000156030	0.915273	2.1e-36	2.35e-34	ELMSAN1	protein_coding	14	73715122	73790285	-1
ENSG00000251493	0.932427	3.01e-36	3.35e-34	FOXD1	protein_coding	5	73444827	73448527	-1
ENSG00000167552	1.3065	3.1e-36	3.43e-34	TUBA1A	protein_coding	12	49184796	49189324	-1
ENSG00000069869	0.814365	4.1e-36	4.51e-34	NEDD4	protein_coding	15	55826922	55993746	-1
ENSG00000163659	1.35977	4.96e-36	5.42e-34	TIPARP	protein_coding	3	156673235	156706770	1
ENSG00000114023	1.52853	1.42e-35	1.55e-33	FAM162A	protein_coding	3	122384176	122412334	1
ENSG00000240694	0.834723	1.53e-35	1.65e-33	PNMA2	protein_coding	8	26504686	26514092	-1
ENSG00000248323	1.80097	1.58e-35	1.69e-33	LUCAT1	antisense	5	91054834	91314547	-1
ENSG00000135766	0.896651	2.42e-35	2.58e-33	EGLN1	protein_coding	1	231363751	231425044	-1
ENSG00000198743	1.08721	2.93e-35	3.1e-33	SLC5A3	protein_coding	21	34073570	34106262	1
ENSG00000161091	0.873185	4.4e-35	4.64e-33	MFSD12	protein_coding	19	3538261	3574290	-1
ENSG00000182054	0.883568	1.11e-34	1.17e-32	IDH2	protein_coding	15	90083045	90102504	-1
ENSG00000074410	1.15283	5.72e-34	5.89e-32	CA12	protein_coding	15	63321378	63382161	-1
ENSG00000166046	2.16641	8.74e-34	8.95e-32	TCP11L2	protein_coding	12	106301929	106347015	1
ENSG00000141959	1.00145	9.64e-34	9.81e-32	PFKL	protein_coding	21	44300051	44327376	1
ENSG00000134954	0.93749	1.09e-33	1.1e-31	ETS1	protein_coding	11	128458761	128587558	-1
ENSG00000127329	2.1042	1.35e-33	1.36e-31	PTPRB	protein_coding	12	70515866	70637440	-1
ENSG00000106799	0.859198	2.34e-33	2.32e-31	TGFBR1	protein_coding	9	99104038	99154192	1
ENSG00000024422	0.901339	7.11e-33	6.96e-31	EHD2	protein_coding	19	47713343	47743134	1
ENSG00000234745	1.60989	7.89e-33	7.63e-31	HLA-B	protein_coding	6	31269491	31357188	-1
ENSG00000146278	1.46308	1.56e-32	1.51e-30	PNRC1	protein_coding	6	89080751	89085160	1
ENSG00000125398	1.63208	1.81e-32	1.74e-30	SOX9	protein_coding	17	72121020	72126420	1
ENSG00000105668	4.0191	2.19e-32	2.08e-30	UPK1A	protein_coding	19	35666516	35678483	1
ENSG00000173237	2.17712	2.7e-32	2.56e-30	C11orf86	protein_coding	11	66975277	66977004	1
ENSG00000054277	1.02619	6.2e-32	5.81e-30	OPN3	protein_coding	1	241590102	241677376	-1
ENSG00000148408	5.18611	1.44e-31	1.34e-29	CACNA1B	protein_coding	9	137877789	138124624	1
ENSG00000079739	0.763294	1.47e-31	1.36e-29	PGM1	protein_coding	1	63593276	63660245	1
ENSG00000113249	1.08794	1.5e-31	1.38e-29	HAVCR1	protein_coding	5	157029413	157059119	-1
ENSG00000099194	1.38329	1.95e-31	1.79e-29	SCD	protein_coding	10	100347124	100364834	1
ENSG00000173890	1.44775	2e-31	1.83e-29	GPR160	protein_coding	3	170037929	170085403	1
ENSG00000166920	1.95412	2.89e-31	2.61e-29	C15orf48	protein_coding	15	45430529	45448761	1
ENSG00000143622	0.988698	3.18e-31	2.86e-29	RIT1	protein_coding	1	155897808	155911404	-1
ENSG00000185567	0.918712	3.62e-31	3.24e-29	AHNAK2	protein_coding	14	104937244	104978357	-1
ENSG00000169032	0.780386	4.81e-31	4.28e-29	MAP2K1	protein_coding	15	66386817	66492312	1
ENSG00000130164	0.862825	4.88e-31	4.32e-29	LDLR	protein_coding	19	11089362	11133816	1
ENSG00000163755	0.712566	5.43e-31	4.79e-29	HPS3	protein_coding	3	149129584	149173732	1
ENSG00000175197	1.70526	6.46e-31	5.66e-29	DDIT3	protein_coding	12	57516588	57521737	-1
ENSG00000144655	1.36271	7.45e-31	6.47e-29	CSRNP1	protein_coding	3	39141855	39154562	-1
ENSG00000137501	1.32777	7.46e-31	6.47e-29	SYTL2	protein_coding	11	85694224	85811159	-1
ENSG00000149925	0.919481	1.18e-30	1.02e-28	ALDOA	protein_coding	16	30064164	30070457	1
ENSG00000164105	1.0882	1.19e-30	1.03e-28	SAP30	protein_coding	4	173369969	173377532	1
ENSG00000135318	0.945185	1.85e-30	1.57e-28	NT5E	protein_coding	6	85449584	85495791	1
ENSG00000125148	0.845489	2.09e-30	1.77e-28	MT2A	protein_coding	16	56608199	56609497	1
ENSG00000142634	0.623781	2.8e-30	2.36e-28	EFHD2	protein_coding	1	15409895	15430343	1
ENSG00000154917	1.72705	2.91e-30	2.44e-28	RAB6B	protein_coding	3	133824239	133895836	-1
ENSG00000134109	0.788143	3.52e-30	2.94e-28	EDEM1	protein_coding	3	5187646	5219957	1
ENSG00000143320	2.09653	4.47e-30	3.72e-28	CRABP2	protein_coding	1	156699606	156705816	-1
ENSG00000104881	1.58603	7.01e-30	5.77e-28	PPP1R13L	protein_coding	19	45379634	45406349	-1
ENSG00000212747	1.43278	7.06e-30	5.79e-28	RTL8B	protein_coding	X	135020504	135022529	-1
ENSG00000116016	0.982617	8.48e-30	6.93e-28	EPAS1	protein_coding	2	46293667	46386703	1
ENSG00000132470	1.049	1.24e-29	1e-27	ITGB4	protein_coding	17	75721328	75757818	1
ENSG00000156273	1.15422	1.4e-29	1.13e-27	BACH1	protein_coding	21	29194071	29630751	1
ENSG00000184497	1.58607	1.9e-29	1.53e-27	TMEM255B	protein_coding	13	113759240	113816995	1
ENSG00000168264	0.721434	2.11e-29	1.69e-27	IRF2BP2	protein_coding	1	234604269	234609525	-1
ENSG00000177150	0.9621	3.33e-29	2.65e-27	FAM210A	protein_coding	18	13663347	13726663	-1
ENSG00000068366	0.692751	4.28e-29	3.38e-27	ACSL4	protein_coding	X	109624244	109733403	-1
ENSG00000157483	0.678202	9.32e-29	7.34e-27	MYO1E	protein_coding	15	59132434	59372900	-1
ENSG00000204054	1.00474	1.52e-28	1.19e-26	LINC00963	processed_transcript	9	129483451	129513686	1
ENSG00000141664	0.894652	1.72e-28	1.34e-26	ZCCHC2	protein_coding	18	62523007	62587709	1
ENSG00000160326	1.07569	2.19e-28	1.69e-26	SLC2A6	protein_coding	9	133471095	133479137	-1
ENSG00000131398	2.48302	2.26e-28	1.74e-26	KCNC3	protein_coding	19	50311937	50333515	-1
ENSG00000172183	1.72992	3.79e-28	2.91e-26	ISG20	protein_coding	15	88636153	88656483	1
ENSG00000196878	1.3654	5.33e-28	4.07e-26	LAMB3	protein_coding	1	209614870	209652466	-1
ENSG00000064042	1.20449	6.62e-28	5.03e-26	LIMCH1	protein_coding	4	41359607	41700044	1
ENSG00000155265	1.81558	9.69e-28	7.33e-26	GOLGA7B	protein_coding	10	97850239	97871580	1
ENSG00000145623	1.24841	9.74e-28	7.34e-26	OSMR	protein_coding	5	38845858	38945596	1
ENSG00000185043	0.667437	1.18e-27	8.82e-26	CIB1	protein_coding	15	90229975	90234047	-1
ENSG00000100504	0.892313	1.2e-27	9e-26	PYGL	protein_coding	14	50857891	50944736	-1
ENSG00000163872	0.802211	1.37e-27	1.01e-25	YEATS2	protein_coding	3	183697818	183812625	1
ENSG00000168243	1.6225	2.56e-27	1.86e-25	GNG4	protein_coding	1	235547687	235650754	-1
ENSG00000117000	0.824006	3.57e-27	2.59e-25	RLF	protein_coding	1	40161373	40240921	1
ENSG00000106617	1.10725	4.46e-27	3.21e-25	PRKAG2	protein_coding	7	151556111	151877125	-1
ENSG00000124942	0.61748	5.49e-27	3.94e-25	AHNAK	protein_coding	11	62433542	62556235	-1
ENSG00000225205	3.54601	7.04e-27	5.03e-25	AC078883.1	antisense	2	172480840	172556596	-1
ENSG00000151748	0.886219	7.4e-27	5.27e-25	SAV1	protein_coding	14	50632058	50668331	-1
ENSG00000166401	1.34053	8.72e-27	6.18e-25	SERPINB8	protein_coding	18	63969925	64019779	1
ENSG00000158856	1.00475	9.71e-27	6.85e-25	DMTN	protein_coding	8	22048995	22082527	1
ENSG00000115866	0.723136	1.61e-26	1.13e-24	DARS	protein_coding	2	135906677	135986100	-1
ENSG00000173530	1.0086	2.35e-26	1.64e-24	TNFRSF10D	protein_coding	8	23135588	23164030	-1
ENSG00000186352	1.98801	2.54e-26	1.77e-24	ANKRD37	protein_coding	4	185396021	185400628	1
ENSG00000124145	0.893951	2.56e-26	1.78e-24	SDC4	protein_coding	20	45325288	45348424	-1
ENSG00000054611	0.917584	3.09e-26	2.13e-24	TBC1D22A	protein_coding	22	46762617	47175699	1
ENSG00000185499	1.7635	3.14e-26	2.15e-24	MUC1	protein_coding	1	155185824	155192916	-1
ENSG00000148798	0.685007	3.35e-26	2.29e-24	INA	protein_coding	10	103277163	103290351	1
ENSG00000146242	1.14282	4.08e-26	2.78e-24	TPBG	protein_coding	6	82363206	82370828	1
ENSG00000073060	1.06237	7.2e-26	4.87e-24	SCARB1	protein_coding	12	124776856	124882668	-1
ENSG00000162545	1.28396	7.53e-26	5.07e-24	CAMK2N1	protein_coding	1	20482391	20486220	-1
ENSG00000092964	0.823661	9.18e-26	6.11e-24	DPYSL2	protein_coding	8	26514022	26658178	1
ENSG00000164638	1.34445	9.52e-26	6.29e-24	SLC29A4	protein_coding	7	5274369	5306870	1
ENSG00000157557	0.925339	1.42e-25	9.34e-24	ETS2	protein_coding	21	38805307	38824955	1
ENSG00000146648	1.32564	1.58e-25	1.04e-23	EGFR	protein_coding	7	55019021	55211628	1
ENSG00000116833	1.6568	1.79e-25	1.17e-23	NR5A2	protein_coding	1	200027602	200177424	1
ENSG00000100311	2.32165	1.83e-25	1.19e-23	PDGFB	protein_coding	22	39223359	39244751	-1
ENSG00000112379	1.62309	2.28e-25	1.48e-23	ARFGEF3	protein_coding	6	138161921	138344663	1
ENSG00000013441	0.846137	2.58e-25	1.67e-23	CLK1	protein_coding	2	200853009	200864744	-1
ENSG00000116883	2.3403	3.8e-25	2.45e-23	AL591845.1	antisense	1	36323734	36329221	1
ENSG00000160285	0.708457	4.05e-25	2.6e-23	LSS	protein_coding	21	46188141	46228824	-1
ENSG00000145107	1.42789	5.66e-25	3.6e-23	TM4SF19	protein_coding	3	196319342	196338503	-1
ENSG00000096696	1.07396	6.01e-25	3.82e-23	DSP	protein_coding	6	7541575	7586717	1
ENSG00000268621	1.53833	8.28e-25	5.24e-23	IGFL2-AS1	lincRNA	19	46189166	46203083	-1
ENSG00000277586	1.67364	1.04e-24	6.53e-23	NEFL	protein_coding	8	24950955	24957110	-1
ENSG00000204186	1.19542	1.18e-24	7.35e-23	ZDBF2	protein_coding	2	206274663	206314438	1
ENSG00000244187	1.17619	2.05e-24	1.27e-22	TMEM141	protein_coding	9	136791355	136793257	1
ENSG00000134824	0.773505	2.1e-24	1.29e-22	FADS2	protein_coding	11	61792980	61867354	1
ENSG00000144749	1.23006	2.88e-24	1.77e-22	LRIG1	protein_coding	3	66378797	66501263	-1
ENSG00000183778	1.23732	3.26e-24	1.99e-22	B3GALT5	protein_coding	21	39556442	39673137	1
ENSG00000119801	0.966836	3.66e-24	2.23e-22	YPEL5	protein_coding	2	30146941	30160533	1
ENSG00000127585	1.30198	3.97e-24	2.41e-22	FBXL16	protein_coding	16	692498	705829	-1
ENSG00000217801	1.3603	4.51e-24	2.73e-22	AL390719.1	transcribed_unprocessed_pseudogene	1	1059734	1069355	1
ENSG00000182240	0.998729	5.46e-24	3.28e-22	BACE2	protein_coding	21	41167801	41282518	1
ENSG00000005448	0.784871	8.58e-24	5.1e-22	WDR54	protein_coding	2	74421678	74425755	1
ENSG00000187098	0.947858	1.21e-23	7.11e-22	MITF	protein_coding	3	69739435	69968337	1
ENSG00000170379	5.76424	1.49e-23	8.69e-22	TCAF2	protein_coding	7	143620952	143730409	1
ENSG00000198053	0.76428	1.67e-23	9.67e-22	SIRPA	protein_coding	20	1894167	1940592	1
ENSG00000106070	1.32405	1.79e-23	1.04e-21	GRB10	protein_coding	7	50590063	50793462	-1
ENSG00000132510	1.17135	1.8e-23	1.04e-21	KDM6B	protein_coding	17	7839904	7854796	1
ENSG00000130821	1.32327	2.68e-23	1.53e-21	SLC6A8	protein_coding	X	153688099	153696593	1
ENSG00000180448	1.11502	2.68e-23	1.53e-21	ARHGAP45	protein_coding	19	1065923	1086628	1
ENSG00000090530	0.781613	2.79e-23	1.59e-21	P3H2	protein_coding	3	189956728	190122437	-1
ENSG00000172086	1.22832	2.86e-23	1.62e-21	KRCC1	protein_coding	2	88027205	88055729	-1
ENSG00000110330	0.717907	2.87e-23	1.62e-21	BIRC2	protein_coding	11	102347211	102378670	1
ENSG00000151640	1.27275	2.99e-23	1.69e-21	DPYSL4	protein_coding	10	132186900	132205776	1
ENSG00000010818	1.07156	3.66e-23	2.06e-21	HIVEP2	protein_coding	6	142751467	142956698	-1
ENSG00000175183	1.19355	5.42e-23	3.02e-21	CSRP2	protein_coding	12	76858715	76879060	-1
ENSG00000113161	0.585747	8.23e-23	4.54e-21	HMGCR	protein_coding	5	75336329	75362104	1
ENSG00000160209	0.597161	8.82e-23	4.84e-21	PDXK	protein_coding	21	43719094	43762307	1
ENSG00000172493	0.725319	1.03e-22	5.62e-21	AFF1	protein_coding	4	86935002	87141054	1
ENSG00000135269	0.808577	1.08e-22	5.85e-21	TES	protein_coding	7	116210493	116258783	1
ENSG00000139278	0.894172	1.33e-22	7.19e-21	GLIPR1	protein_coding	12	75480680	75503853	1
ENSG00000130827	1.60564	1.63e-22	8.79e-21	PLXNA3	protein_coding	X	154458281	154477779	1
ENSG00000185022	1.29131	2.31e-22	1.23e-20	MAFF	protein_coding	22	38200767	38216511	1
ENSG00000167080	2.26922	4.02e-22	2.14e-20	B4GALNT2	protein_coding	17	49132460	49176840	1
ENSG00000156113	0.584423	5.58e-22	2.95e-20	KCNMA1	protein_coding	10	76869601	77638369	-1
ENSG00000125637	1.29942	6.11e-22	3.22e-20	PSD4	protein_coding	2	113157325	113209396	1
ENSG00000134590	0.657146	9.82e-22	5.15e-20	RTL8C	protein_coding	X	135032366	135033546	1
ENSG00000196850	0.741189	1.36e-21	7.08e-20	PPTC7	protein_coding	12	110533245	110583320	-1
ENSG00000116977	0.657793	1.52e-21	7.9e-20	LGALS8	protein_coding	1	236518000	236552981	1
ENSG00000158023	2.4512	1.79e-21	9.22e-20	WDR66	protein_coding	12	121917862	122003927	1
ENSG00000128923	0.777796	1.97e-21	1.01e-19	MINDY2	protein_coding	15	58771192	58861900	1
ENSG00000121895	0.832165	2.04e-21	1.04e-19	TMEM156	protein_coding	4	38966744	39032922	-1
ENSG00000175931	0.609604	2.08e-21	1.06e-19	UBE2O	protein_coding	17	76389451	76453206	-1
ENSG00000275410	0.793938	3.02e-21	1.53e-19	HNF1B	protein_coding	17	37686432	37745247	-1
ENSG00000122786	0.680843	3.09e-21	1.56e-19	CALD1	protein_coding	7	134744252	134970728	1
ENSG00000181827	0.658532	3.2e-21	1.61e-19	RFX7	protein_coding	15	56087280	56243266	-1
ENSG00000103089	1.65656	4.24e-21	2.13e-19	FA2H	protein_coding	16	74712955	74774831	-1
ENSG00000023445	0.957799	4.78e-21	2.39e-19	BIRC3	protein_coding	11	102317450	102339403	1
ENSG00000109929	0.961319	7.28e-21	3.62e-19	SC5D	protein_coding	11	121292453	121308694	1
ENSG00000172164	1.24137	7.85e-21	3.89e-19	SNTB1	protein_coding	8	120535745	120813273	-1
ENSG00000061656	2.06185	8.33e-21	4.12e-19	SPAG4	protein_coding	20	35615892	35621049	1
ENSG00000204217	0.630234	8.42e-21	4.16e-19	BMPR2	protein_coding	2	202376936	202567751	1
ENSG00000166473	1.14969	1.06e-20	5.21e-19	PKD1L2	polymorphic_pseudogene	16	81100875	81220370	-1
ENSG00000102554	0.768372	1.6e-20	7.81e-19	KLF5	protein_coding	13	73054976	73077542	1
ENSG00000139725	0.702539	1.96e-20	9.46e-19	RHOF	protein_coding	12	121777754	121803403	-1
ENSG00000173221	1.1746	1.96e-20	9.48e-19	GLRX	protein_coding	5	95751319	95823005	-1
ENSG00000065308	0.625791	3.57e-20	1.7e-18	TRAM2	protein_coding	6	52497402	52576915	-1
ENSG00000025039	1.07784	3.64e-20	1.73e-18	RRAGD	protein_coding	6	89364636	89412270	-1
ENSG00000196639	1.02976	3.75e-20	1.78e-18	HRH1	protein_coding	3	11137093	11263557	1
ENSG00000197562	0.904435	4.14e-20	1.96e-18	RAB40C	protein_coding	16	589357	629272	1
ENSG00000107338	1.06225	4.85e-20	2.28e-18	SHB	protein_coding	9	37919134	38069211	-1
ENSG00000188191	0.809906	4.85e-20	2.28e-18	PRKAR1B	protein_coding	7	549197	727650	-1
ENSG00000114120	0.720932	4.88e-20	2.29e-18	SLC25A36	protein_coding	3	140941830	140980961	1
ENSG00000101782	0.870761	5.45e-20	2.54e-18	RIOK3	protein_coding	18	23452823	23486603	1
ENSG00000156535	0.585323	5.81e-20	2.7e-18	CD109	protein_coding	6	73695785	73828316	1
ENSG00000166592	1.65729	6.29e-20	2.91e-18	RRAD	protein_coding	16	66921679	66925644	-1
ENSG00000139926	0.816751	6.31e-20	2.91e-18	FRMD6	protein_coding	14	51489100	51730727	1
ENSG00000006459	1.92446	8.05e-20	3.69e-18	KDM7A	protein_coding	7	140084746	140177035	-1
ENSG00000076641	1.90225	8.17e-20	3.74e-18	PAG1	protein_coding	8	80967810	81112068	-1
ENSG00000260549	1.08341	1.07e-19	4.89e-18	MT1L	transcribed_unprocessed_pseudogene	16	56617476	56618818	1
ENSG00000173575	0.737541	1.15e-19	5.23e-18	CHD2	protein_coding	15	92900189	93028005	1
ENSG00000275993	0.695319	1.16e-19	5.27e-18	SIK1B	protein_coding	21	6111134	6123739	1
ENSG00000140682	1.16687	1.31e-19	5.92e-18	TGFB1I1	protein_coding	16	31471585	31477960	1
ENSG00000244649	1.75755	1.47e-19	6.6e-18	LINC02086	lincRNA	17	48646923	48707346	1
ENSG00000151882	2.47394	1.97e-19	8.79e-18	CCL28	protein_coding	5	43376645	43412391	-1
ENSG00000047346	0.870369	2.22e-19	9.85e-18	FAM214A	protein_coding	15	52581317	52709817	-1
ENSG00000155876	0.603253	3.05e-19	1.34e-17	RRAGA	protein_coding	9	19049395	19050983	1
ENSG00000157827	0.696859	3.18e-19	1.4e-17	FMNL2	protein_coding	2	152335237	152649834	1
ENSG00000089916	0.641991	3.33e-19	1.46e-17	GPATCH2L	protein_coding	14	76151916	76254342	1
ENSG00000175155	1.46396	3.39e-19	1.48e-17	YPEL2	protein_coding	17	59331689	59401729	1
ENSG00000149485	0.700043	3.5e-19	1.53e-17	FADS1	protein_coding	11	61799625	61829318	-1
ENSG00000171303	1.33518	4.22e-19	1.83e-17	KCNK3	protein_coding	2	26692690	26733420	1
ENSG00000175938	1.27591	4.81e-19	2.07e-17	ORAI3	protein_coding	16	30949066	30956461	1
ENSG00000170949	0.971897	7.55e-19	3.21e-17	ZNF160	protein_coding	19	53066606	53103436	-1
ENSG00000172081	0.789294	8.24e-19	3.5e-17	MOB3A	protein_coding	19	2071038	2096673	-1
ENSG00000105048	1.18397	8.37e-19	3.55e-17	TNNT1	protein_coding	19	55132794	55149354	-1
ENSG00000273230	1.14986	9.34e-19	3.93e-17	AC102953.2	lincRNA	7	1464497	1467522	-1
ENSG00000150991	0.79505	9.72e-19	4.08e-17	UBC	protein_coding	12	124911604	124917368	-1
ENSG00000105204	1.08126	1e-18	4.19e-17	DYRK1B	protein_coding	19	39825350	39834201	-1
ENSG00000088340	1.52599	1.42e-18	5.89e-17	FER1L4	transcribed_unitary_pseudogene	20	35558737	35607562	-1
ENSG00000019505	1.01338	1.42e-18	5.9e-17	SYT13	protein_coding	11	45240301	45286319	-1
ENSG00000183111	1.97778	1.46e-18	6.03e-17	ARHGEF37	protein_coding	5	149551947	149634968	1
ENSG00000102312	1.28422	1.52e-18	6.27e-17	PORCN	protein_coding	X	48508962	48520814	1
ENSG00000125826	0.89065	1.67e-18	6.83e-17	RBCK1	protein_coding	20	407498	430966	1
ENSG00000180628	0.928693	1.86e-18	7.56e-17	PCGF5	protein_coding	10	91163012	91284331	1
ENSG00000156650	0.680582	2.48e-18	1e-16	KAT6B	protein_coding	10	74824927	75032624	1
ENSG00000089775	0.846214	2.82e-18	1.13e-16	ZBTB25	protein_coding	14	64449106	64505213	-1
ENSG00000179833	0.678048	3.27e-18	1.31e-16	SERTAD2	protein_coding	2	64631621	64751005	-1
ENSG00000168528	1.49966	3.58e-18	1.43e-16	SERINC2	protein_coding	1	31409565	31434680	1
ENSG00000112972	0.767602	3.8e-18	1.52e-16	HMGCS1	protein_coding	5	43289395	43313512	-1
ENSG00000175582	0.599412	3.95e-18	1.57e-16	RAB6A	protein_coding	11	73675638	73761137	-1
ENSG00000135924	0.922565	4.42e-18	1.76e-16	DNAJB2	protein_coding	2	219279267	219286900	1
ENSG00000099849	0.77798	4.84e-18	1.92e-16	RASSF7	protein_coding	11	560404	564021	1
ENSG00000123240	0.947907	4.98e-18	1.97e-16	OPTN	protein_coding	10	13099449	13138308	1
ENSG00000127561	1.82619	5.47e-18	2.16e-16	SYNGR3	protein_coding	16	1989660	1994275	1
ENSG00000152217	1.05261	6.17e-18	2.42e-16	SETBP1	protein_coding	18	44680173	45068510	1
ENSG00000241852	1.08229	6.28e-18	2.46e-16	C8orf58	protein_coding	8	22599601	22604150	1
ENSG00000143322	0.600609	6.49e-18	2.53e-16	ABL2	protein_coding	1	179099327	179229684	-1
ENSG00000079432	0.604634	6.96e-18	2.7e-16	CIC	protein_coding	19	42268537	42295797	1
ENSG00000187550	2.36307	7.45e-18	2.88e-16	SBK2	protein_coding	19	55529733	55537089	-1
ENSG00000168214	0.649726	7.6e-18	2.93e-16	RBPJ	protein_coding	4	26163455	26435131	1
ENSG00000026025	0.634754	9.69e-18	3.69e-16	VIM	protein_coding	10	17228259	17237593	1
ENSG00000231890	2.19645	9.94e-18	3.78e-16	DARS-AS1	antisense	2	135985176	136022593	1
ENSG00000167508	0.715886	1.02e-17	3.86e-16	MVD	protein_coding	16	88651935	88663161	-1
ENSG00000125841	0.632003	1.12e-17	4.24e-16	NRSN2	protein_coding	20	346782	359660	1
ENSG00000198682	0.588094	1.12e-17	4.24e-16	PAPSS2	protein_coding	10	87659613	87747705	1
ENSG00000010278	0.596312	1.21e-17	4.57e-16	CD9	protein_coding	12	6199715	6238271	1
ENSG00000184441	2.48057	1.25e-17	4.69e-16	AP001062.1	antisense	21	44331234	44335851	1
ENSG00000104756	0.700868	1.28e-17	4.78e-16	KCTD9	protein_coding	8	25427847	25458476	-1
ENSG00000102878	1.17481	1.5e-17	5.59e-16	HSF4	protein_coding	16	67164681	67169945	1
ENSG00000226510	4.82965	1.8e-17	6.63e-16	UPK1A-AS1	antisense	19	35667948	35673291	-1
ENSG00000068305	0.763005	2.27e-17	8.34e-16	MEF2A	protein_coding	15	99565417	99716466	1
ENSG00000172059	0.901639	2.46e-17	9e-16	KLF11	protein_coding	2	10042849	10054836	1
ENSG00000130270	1.01541	2.6e-17	9.46e-16	ATP8B3	protein_coding	19	1782075	1812276	-1
ENSG00000144320	0.922654	3e-17	1.09e-15	LNPK	protein_coding	2	175923892	176002839	-1
ENSG00000119686	1.28331	3.06e-17	1.11e-15	FLVCR2	protein_coding	14	75578617	75663214	1
ENSG00000166923	0.780259	3.81e-17	1.37e-15	GREM1	protein_coding	15	32717974	32745107	1
ENSG00000106366	2.30575	4.2e-17	1.5e-15	SERPINE1	protein_coding	7	101127089	101139266	1
ENSG00000101187	0.910689	4.27e-17	1.53e-15	SLCO4A1	protein_coding	20	62642445	62685785	1
ENSG00000095596	3.90172	4.53e-17	1.62e-15	CYP26A1	protein_coding	10	93073475	93077890	1
ENSG00000197467	1.0048	4.56e-17	1.63e-15	COL13A1	protein_coding	10	69801867	69964275	1
ENSG00000173210	0.999613	4.65e-17	1.65e-15	ABLIM3	protein_coding	5	149141483	149260542	1
ENSG00000259207	1.34064	4.79e-17	1.69e-15	ITGB3	protein_coding	17	47253846	47311816	1
ENSG00000186594	0.828738	5.27e-17	1.85e-15	MIR22HG	lincRNA	17	1711493	1717174	-1
ENSG00000131016	2.09008	5.33e-17	1.87e-15	AKAP12	protein_coding	6	151239999	151358557	1
ENSG00000162105	0.72608	5.8e-17	2.03e-15	SHANK2	protein_coding	11	70467856	71252577	-1
ENSG00000166073	0.870911	6.52e-17	2.27e-15	GPR176	protein_coding	15	39799032	39920892	-1
ENSG00000171462	1.25565	6.66e-17	2.31e-15	DLK2	protein_coding	6	43450352	43456632	-1
ENSG00000068971	1.40658	7.77e-17	2.69e-15	PPP2R5B	protein_coding	11	64917553	64934473	1
ENSG00000139793	0.819562	8.64e-17	2.98e-15	MBNL2	protein_coding	13	97221434	97394120	1
ENSG00000169554	1.00142	9.51e-17	3.27e-15	ZEB2	protein_coding	2	144364364	144524583	-1
ENSG00000134294	0.650467	1.14e-16	3.92e-15	SLC38A2	protein_coding	12	46358189	46372867	-1
ENSG00000067064	0.703995	1.2e-16	4.08e-15	IDI1	protein_coding	10	1039152	1049170	-1
ENSG00000164056	1.70481	1.27e-16	4.3e-15	SPRY1	protein_coding	4	123396795	123403760	1
ENSG00000275074	1.1222	1.35e-16	4.54e-15	NUDT18	protein_coding	8	22106872	22109419	-1
ENSG00000110328	0.724744	1.54e-16	5.17e-15	GALNT18	protein_coding	11	11270876	11622005	-1
ENSG00000051108	1.1126	1.8e-16	6.04e-15	HERPUD1	protein_coding	16	56932048	56944863	1
ENSG00000178802	0.689889	2.04e-16	6.77e-15	MPI	protein_coding	15	74890005	74902219	1
ENSG00000148848	0.705947	2.25e-16	7.44e-15	ADAM12	protein_coding	10	126012381	126388455	-1
ENSG00000204178	0.712971	2.42e-16	8e-15	MACO1	protein_coding	1	25430858	25500209	1
ENSG00000143674	0.613635	2.54e-16	8.36e-15	MAP3K21	protein_coding	1	233327768	233385148	1
ENSG00000107771	0.643664	2.79e-16	9.16e-15	CCSER2	protein_coding	10	84328558	84518521	1
ENSG00000272398	0.654723	2.92e-16	9.56e-15	CD24	protein_coding	6	106969831	106975627	-1
ENSG00000179820	0.839896	3.54e-16	1.15e-14	MYADM	protein_coding	19	53866223	53876437	1
ENSG00000185262	0.580619	3.82e-16	1.24e-14	UBALD2	protein_coding	17	76265202	76271299	1
ENSG00000163818	0.809234	3.94e-16	1.27e-14	LZTFL1	protein_coding	3	45823316	45916042	-1
ENSG00000133488	1.28463	4.13e-16	1.33e-14	SEC14L4	protein_coding	22	30488913	30505711	-1
ENSG00000139433	0.655223	4.2e-16	1.35e-14	GLTP	protein_coding	12	109850943	109880488	-1
ENSG00000164463	1.08886	8.13e-16	2.56e-14	CREBRF	protein_coding	5	173056352	173139284	1
ENSG00000182472	1.35675	8.64e-16	2.71e-14	CAPN12	protein_coding	19	38730187	38769904	-1
ENSG00000114796	0.957294	8.62e-16	2.71e-14	KLHL24	protein_coding	3	183635568	183684477	1
ENSG00000197016	1.09134	8.7e-16	2.72e-14	ZNF470	protein_coding	19	56567511	56588911	1
ENSG00000026652	1.22984	9.13e-16	2.85e-14	AGPAT4	protein_coding	6	161129979	161274061	-1
ENSG00000130766	1.09182	1.03e-15	3.19e-14	SESN2	protein_coding	1	28259527	28282491	1
ENSG00000184156	1.53784	1.18e-15	3.66e-14	KCNQ3	protein_coding	8	132120858	132481019	-1
ENSG00000100344	1.14582	1.25e-15	3.86e-14	PNPLA3	protein_coding	22	43923739	43964488	1
ENSG00000142910	1.01234	1.41e-15	4.32e-14	TINAGL1	protein_coding	1	31576485	31587686	1
ENSG00000150593	0.669582	1.65e-15	5.06e-14	PDCD4	protein_coding	10	110871795	110900006	1
ENSG00000117139	0.840149	1.76e-15	5.37e-14	KDM5B	protein_coding	1	202724495	202809470	-1
ENSG00000100557	1.7003	1.9e-15	5.8e-14	CCDC198	protein_coding	14	57469301	57493867	-1
ENSG00000145819	1.05097	2.07e-15	6.31e-14	ARHGAP26	protein_coding	5	142770377	143229011	1
ENSG00000075420	0.822421	2.35e-15	7.11e-14	FNDC3B	protein_coding	3	172039628	172401665	1
ENSG00000162426	1.73065	2.52e-15	7.61e-14	SLC45A1	protein_coding	1	8317826	8344167	1
ENSG00000146966	1.45302	2.71e-15	8.19e-14	DENND2A	protein_coding	7	140518420	140673993	-1
ENSG00000254815	2.36092	2.97e-15	8.89e-14	AP006284.1	antisense	11	557595	560107	1
ENSG00000137285	1.73255	3.04e-15	9.1e-14	TUBB2B	protein_coding	6	3224261	3231730	-1
ENSG00000188002	0.891936	3.05e-15	9.11e-14	AC026412.1	transcribed_unprocessed_pseudogene	5	1598920	1634005	-1
ENSG00000260822	1.21971	3.44e-15	1.02e-13	AC004656.1	sense_overlapping	X	24545516	24550466	1
ENSG00000053254	0.689763	3.62e-15	1.07e-13	FOXN3	protein_coding	14	89124871	89619149	-1
ENSG00000141655	0.656633	3.65e-15	1.08e-13	TNFRSF11A	protein_coding	18	62325287	62391292	1
ENSG00000059804	2.44055	6.86e-15	1.99e-13	SLC2A3	protein_coding	12	7919230	7936275	-1
ENSG00000059728	1.1263	7.72e-15	2.23e-13	MXD1	protein_coding	2	69897688	69942945	1
ENSG00000275216	0.773082	9.26e-15	2.66e-13	AL161431.1	lincRNA	13	109269634	109278512	1
ENSG00000117266	2.10968	1.25e-14	3.54e-13	CDK18	protein_coding	1	205504595	205532793	1
ENSG00000126803	1.11224	1.4e-14	3.95e-13	HSPA2	protein_coding	14	64535905	64546173	1
ENSG00000130731	0.607705	1.46e-14	4.1e-13	METTL26	protein_coding	16	634427	636366	-1
ENSG00000164849	1.75205	1.52e-14	4.28e-13	GPR146	protein_coding	7	1044576	1059261	1
ENSG00000132196	0.744126	1.72e-14	4.81e-13	HSD17B7	protein_coding	1	162790702	162812817	1
ENSG00000229656	1.51493	1.83e-14	5.12e-13	ITGB1-DT	lincRNA	10	32958845	33082102	1
ENSG00000246273	0.947145	2.05e-14	5.73e-13	SBF2-AS1	antisense	11	9758292	9811335	1
ENSG00000108840	0.717444	2.47e-14	6.84e-13	HDAC5	protein_coding	17	44076746	44123702	-1
ENSG00000181744	0.922675	2.49e-14	6.88e-13	C3orf58	protein_coding	3	143971798	144048719	1
ENSG00000145779	0.710003	2.54e-14	7e-13	TNFAIP8	protein_coding	5	119268692	119399688	1
ENSG00000101213	1.59758	2.85e-14	7.78e-13	PTK6	protein_coding	20	63528001	63537370	-1
ENSG00000162734	0.589299	3.16e-14	8.55e-13	PEA15	protein_coding	1	160205337	160215376	1
ENSG00000170345	2.51113	3.42e-14	9.24e-13	FOS	protein_coding	14	75278774	75282230	1
ENSG00000169031	2.11286	3.91e-14	1.05e-12	COL4A3	protein_coding	2	227164565	227314792	1
ENSG00000135365	0.878838	3.98e-14	1.07e-12	PHF21A	protein_coding	11	45929323	46121178	-1
ENSG00000151151	0.874872	4.73e-14	1.26e-12	IPMK	protein_coding	10	58191517	58267934	-1
ENSG00000125648	0.582258	4.79e-14	1.27e-12	SLC25A23	protein_coding	19	6436079	6465203	-1
ENSG00000157510	0.891325	5.04e-14	1.33e-12	AFAP1L1	protein_coding	5	149271871	149341802	1
ENSG00000183049	0.635906	5.58e-14	1.46e-12	CAMK1D	protein_coding	10	12349482	12835545	1
ENSG00000137962	0.633881	5.88e-14	1.54e-12	ARHGAP29	protein_coding	1	94148988	94275068	-1
ENSG00000266976	5.15031	6.07e-14	1.58e-12	AC079466.1	lincRNA	19	28606688	28615229	1
ENSG00000148154	0.752352	7.92e-14	2.06e-12	UGCG	protein_coding	9	111896766	111935369	1
ENSG00000143878	0.759372	9.05e-14	2.33e-12	RHOB	protein_coding	2	20447074	20449445	1
ENSG00000107077	0.666746	9.7e-14	2.47e-12	KDM4C	protein_coding	9	6720863	7175648	1
ENSG00000138944	1.65771	1.08e-13	2.73e-12	SHISAL1	protein_coding	22	44243667	44312851	-1
ENSG00000162366	0.983213	1.07e-13	2.73e-12	PDZK1IP1	protein_coding	1	47183593	47191044	-1
ENSG00000161638	1.01967	1.1e-13	2.78e-12	ITGA5	protein_coding	12	54395261	54419460	-1
ENSG00000134755	0.819928	1.11e-13	2.81e-12	DSC2	protein_coding	18	31058840	31102522	-1
ENSG00000139832	1.89339	1.22e-13	3.09e-12	RAB20	protein_coding	13	110523066	110561733	-1
ENSG00000152284	1.73237	1.3e-13	3.28e-12	TCF7L1	protein_coding	2	85133410	85310388	1
ENSG00000114861	0.59505	1.39e-13	3.5e-12	FOXP1	protein_coding	3	70952817	71583993	-1
ENSG00000147689	1.57289	1.58e-13	3.95e-12	FAM83A	protein_coding	8	123178960	123210079	1
ENSG00000128342	0.757458	1.63e-13	4.06e-12	LIF	protein_coding	22	30240447	30246851	-1
ENSG00000228451	1.52411	1.81e-13	4.51e-12	SDAD1P1	transcribed_processed_pseudogene	8	26375913	26382953	-1
ENSG00000283632	1.96451	2.2e-13	5.39e-12	EXOC3L2	protein_coding	19	45212621	45245431	-1
ENSG00000184916	0.706008	2.38e-13	5.82e-12	JAG2	protein_coding	14	105140981	105168824	-1
ENSG00000133138	0.92919	2.39e-13	5.83e-12	TBC1D8B	protein_coding	X	106802680	106876145	1
ENSG00000196843	0.957651	2.47e-13	6.01e-12	ARID5A	protein_coding	2	96536743	96552638	1
ENSG00000101665	0.681477	2.92e-13	7.04e-12	SMAD7	protein_coding	18	48919853	48952052	-1
ENSG00000120913	0.925466	3.13e-13	7.5e-12	PDLIM2	protein_coding	8	22578279	22598025	1
ENSG00000153162	1.20033	3.45e-13	8.24e-12	BMP6	protein_coding	6	7726797	7881422	1
ENSG00000165195	0.869736	3.62e-13	8.64e-12	PIGA	protein_coding	X	15319451	15335580	-1
ENSG00000008086	1.01492	3.69e-13	8.78e-12	CDKL5	protein_coding	X	18425583	18653629	1
ENSG00000154217	1.12599	3.81e-13	9.06e-12	PITPNC1	protein_coding	17	67377281	67697261	1
ENSG00000143499	0.651419	3.85e-13	9.13e-12	SMYD2	protein_coding	1	214281102	214337131	1
ENSG00000164176	0.845412	4.35e-13	1.03e-11	EDIL3	protein_coding	5	83940554	84384793	-1
ENSG00000124006	0.64387	4.7e-13	1.11e-11	OBSL1	protein_coding	2	219550729	219571859	-1
ENSG00000205129	3.39966	5.76e-13	1.35e-11	C4orf47	protein_coding	4	185426249	185449826	1
ENSG00000166510	0.944921	6.55e-13	1.51e-11	CCDC68	protein_coding	18	54901509	54959508	-1
ENSG00000037637	0.58125	6.7e-13	1.55e-11	FBXO42	protein_coding	1	16246839	16352454	-1
ENSG00000180815	0.963682	6.98e-13	1.61e-11	MAP3K15	protein_coding	X	19360056	19515261	-1
ENSG00000123933	0.914533	7.55e-13	1.73e-11	MXD4	protein_coding	4	2247432	2262294	-1
ENSG00000278948	1.18824	8.02e-13	1.83e-11	AL031587.5	TEC	22	37943050	37944898	1
ENSG00000167535	0.925331	8.31e-13	1.88e-11	CACNB3	protein_coding	12	48813794	48828941	1
ENSG00000177453	3.60973	9.91e-13	2.23e-11	NIM1K	protein_coding	5	43192071	43280850	1
ENSG00000138640	0.74655	9.94e-13	2.23e-11	FAM13A	protein_coding	4	88725955	89111398	-1
ENSG00000173230	0.69048	9.92e-13	2.23e-11	GOLGB1	protein_coding	3	121663199	121749767	-1
ENSG00000144935	0.681619	1.07e-12	2.41e-11	TRPC1	protein_coding	3	142724074	142807888	1
ENSG00000102871	0.602277	1.13e-12	2.53e-11	TRADD	protein_coding	16	67154180	67160298	-1
ENSG00000171314	0.70138	1.23e-12	2.74e-11	PGAM1	protein_coding	10	97426160	97433441	1
ENSG00000158555	1.09796	1.25e-12	2.78e-11	GDPD5	protein_coding	11	75434640	75525903	-1
ENSG00000214900	1.28183	1.25e-12	2.79e-11	LINC01588	lincRNA	14	49927571	50092643	-1
ENSG00000154358	0.802445	1.45e-12	3.2e-11	OBSCN	protein_coding	1	228208130	228378874	1
ENSG00000101265	0.740345	1.53e-12	3.38e-11	RASSF2	protein_coding	20	4780023	4823645	-1
ENSG00000130522	0.937372	1.97e-12	4.3e-11	JUND	protein_coding	19	18279760	18281622	-1
ENSG00000144821	1.34127	1.99e-12	4.33e-11	MYH15	protein_coding	3	108380369	108529322	-1
ENSG00000168350	3.08439	2.01e-12	4.38e-11	DEGS2	protein_coding	14	100143957	100160163	-1
ENSG00000166025	0.689683	2.14e-12	4.64e-11	AMOTL1	protein_coding	11	94706431	94876753	1
ENSG00000140941	0.622055	2.36e-12	5.09e-11	MAP1LC3B	protein_coding	16	87383995	87404779	1
ENSG00000081760	0.671397	2.59e-12	5.57e-11	AACS	protein_coding	12	125065379	125143333	1
ENSG00000269926	2.02772	2.8e-12	5.99e-11	DDIT4-AS1	antisense	10	72274915	72275980	-1
ENSG00000119242	0.80549	2.88e-12	6.15e-11	CCDC92	protein_coding	12	123918660	123972831	-1
ENSG00000151422	0.674527	3.04e-12	6.47e-11	FER	protein_coding	5	108747822	109196841	1
ENSG00000145390	0.740785	3.16e-12	6.71e-11	USP53	protein_coding	4	119212587	119295517	1
ENSG00000142867	0.766803	3.8e-12	8.01e-11	BCL10	protein_coding	1	85265776	85276904	-1
ENSG00000196428	0.715595	3.93e-12	8.26e-11	TSC22D2	protein_coding	3	150408335	150466431	1
ENSG00000179832	0.613602	4.07e-12	8.55e-11	MROH1	protein_coding	8	144148016	144261940	1
ENSG00000163683	0.765973	4.13e-12	8.65e-11	SMIM14	protein_coding	4	39546330	39639090	-1
ENSG00000118689	0.597691	4.32e-12	9.02e-11	FOXO3	protein_coding	6	108559835	108684774	1
ENSG00000077420	0.909847	4.52e-12	9.42e-11	APBB1IP	protein_coding	10	26438203	26567803	1
ENSG00000145911	1.93683	4.89e-12	1.01e-10	N4BP3	protein_coding	5	178113443	178126087	1
ENSG00000106688	1.18816	4.87e-12	1.01e-10	SLC1A1	protein_coding	9	4490444	4587469	1
ENSG00000078804	0.937581	5.06e-12	1.04e-10	TP53INP2	protein_coding	20	34704290	34713439	1
ENSG00000166886	0.752051	5.07e-12	1.04e-10	NAB2	protein_coding	12	57088894	57095476	1
ENSG00000117143	0.791785	5.48e-12	1.13e-10	UAP1	protein_coding	1	162561506	162599842	1
ENSG00000080031	2.24094	6.13e-12	1.25e-10	PTPRH	protein_coding	19	55181248	55209506	-1
ENSG00000197381	0.823652	6.37e-12	1.3e-10	ADARB1	protein_coding	21	45073853	45226560	1
ENSG00000101457	0.729366	6.55e-12	1.33e-10	DNTTIP1	protein_coding	20	45791937	45811427	1
ENSG00000163364	1.27149	6.67e-12	1.36e-10	LINC01116	lincRNA	2	176629589	176637931	-1
ENSG00000155324	0.794299	7.28e-12	1.48e-10	GRAMD2B	protein_coding	5	126360132	126496494	1
ENSG00000130363	1.002	7.98e-12	1.61e-10	RSPH3	protein_coding	6	158972871	159000187	-1
ENSG00000146166	1.23687	8.32e-12	1.67e-10	LGSN	protein_coding	6	63275951	63319977	-1
ENSG00000164603	0.73673	8.95e-12	1.79e-10	BMT2	protein_coding	7	112819147	112939916	-1
ENSG00000103742	1.31196	9.75e-12	1.94e-10	IGDCC4	protein_coding	15	65381464	65423072	-1
ENSG00000204634	0.697924	1.09e-11	2.16e-10	TBC1D8	protein_coding	2	101007617	101252866	-1
ENSG00000134297	1.03989	1.13e-11	2.23e-10	PLEKHA8P1	transcribed_processed_pseudogene	12	45173064	45216041	-1
ENSG00000141446	0.593441	1.22e-11	2.39e-10	ESCO1	protein_coding	18	21529281	21600884	-1
ENSG00000105929	2.16226	1.32e-11	2.57e-10	ATP6V0A4	protein_coding	7	138706294	138799560	-1
ENSG00000133805	0.745589	1.34e-11	2.62e-10	AMPD3	protein_coding	11	10308313	10507579	1
ENSG00000135722	0.925369	1.64e-11	3.16e-10	FBXL8	protein_coding	16	67159931	67164570	1
ENSG00000230882	1.23529	1.75e-11	3.35e-10	AC005077.4	processed_pseudogene	7	76071469	76074963	-1
ENSG00000133794	0.830446	1.85e-11	3.54e-10	ARNTL	protein_coding	11	13276652	13387266	1
ENSG00000088854	0.814926	1.94e-11	3.71e-10	C20orf194	protein_coding	20	3249305	3407625	-1
ENSG00000136826	0.788747	1.97e-11	3.75e-10	KLF4	protein_coding	9	107484852	107490482	-1
ENSG00000100100	2.16574	1.98e-11	3.77e-10	PIK3IP1	protein_coding	22	31281593	31292534	-1
ENSG00000273038	0.691308	2.1e-11	4e-10	AL365203.2	lincRNA	10	32887255	32889311	-1
ENSG00000169715	0.982616	2.12e-11	4.03e-10	MT1E	protein_coding	16	56625475	56627112	1
ENSG00000003137	0.944226	2.37e-11	4.49e-10	CYP26B1	protein_coding	2	72129238	72148038	-1
ENSG00000135636	0.833239	2.61e-11	4.92e-10	DYSF	protein_coding	2	71453722	71686768	1
ENSG00000087303	0.951423	3.03e-11	5.65e-10	NID2	protein_coding	14	52004803	52069228	-1
ENSG00000115419	0.654035	3.25e-11	6.05e-10	GLS	protein_coding	2	190880827	190965552	1
ENSG00000166016	0.587581	3.29e-11	6.11e-10	ABTB2	protein_coding	11	34150988	34358008	-1
ENSG00000165512	0.694898	3.87e-11	7.12e-10	ZNF22	protein_coding	10	45000475	45005326	1
ENSG00000087266	0.673387	4.14e-11	7.62e-10	SH3BP2	protein_coding	4	2793023	2841098	1
ENSG00000175414	1.42126	4.22e-11	7.75e-10	ARL10	protein_coding	5	176365468	176401865	1
ENSG00000262454	0.940328	4.27e-11	7.82e-10	MIR193BHG	lincRNA	16	14301389	14331067	1
ENSG00000185168	1.90758	4.29e-11	7.85e-10	LINC00482	lincRNA	17	81303771	81309248	-1
ENSG00000073711	0.666086	4.58e-11	8.32e-10	PPP2R3A	protein_coding	3	135965673	136147891	1
ENSG00000162772	2.27279	6e-11	1.08e-09	ATF3	protein_coding	1	212565334	212620777	1
ENSG00000188060	0.626465	6.17e-11	1.1e-09	RAB42	protein_coding	1	28592200	28595443	1
ENSG00000153233	2.0785	6.41e-11	1.14e-09	PTPRR	protein_coding	12	70638073	70920843	-1
ENSG00000049239	0.714864	6.5e-11	1.16e-09	H6PD	protein_coding	1	9234775	9271337	1
ENSG00000213213	2.46413	7.28e-11	1.28e-09	CCDC183	protein_coding	9	136796350	136807741	1
ENSG00000011422	0.627559	7.47e-11	1.31e-09	PLAUR	protein_coding	19	43646095	43670547	-1
ENSG00000116032	1.59451	7.89e-11	1.38e-09	GRIN3B	protein_coding	19	1000419	1009732	1
ENSG00000119508	1.18863	8.55e-11	1.49e-09	NR4A3	protein_coding	9	99821855	99866891	1
ENSG00000250462	0.699416	9.15e-11	1.58e-09	LRRC37BP1	transcribed_unprocessed_pseudogene	17	30629680	30637466	1
ENSG00000198753	1.08863	9.45e-11	1.63e-09	PLXNB3	protein_coding	X	153764196	153779346	1
ENSG00000101400	0.760943	1.03e-10	1.77e-09	SNTA1	protein_coding	20	33407955	33443892	-1
ENSG00000131069	1.11131	1.05e-10	1.81e-09	ACSS2	protein_coding	20	34872146	34927962	1
ENSG00000158825	1.33528	1.43e-10	2.41e-09	CDA	protein_coding	1	20588948	20618908	1
ENSG00000161653	1.00183	1.44e-10	2.43e-09	NAGS	protein_coding	17	44004546	44009063	1
ENSG00000165861	0.647166	1.85e-10	3.1e-09	ZFYVE1	protein_coding	14	72969451	73027212	-1
ENSG00000274750	0.885755	1.97e-10	3.27e-09	HIST1H3E	protein_coding	6	26224199	26227473	1
ENSG00000176597	0.789458	1.98e-10	3.29e-09	B3GNT5	protein_coding	3	183253244	183298504	1
ENSG00000173930	2.5824	2.17e-10	3.59e-09	SLCO4C1	protein_coding	5	102233986	102296549	-1
ENSG00000174327	0.633435	2.21e-10	3.64e-09	SLC16A13	protein_coding	17	7036075	7040121	1
ENSG00000087074	1.45258	2.22e-10	3.65e-09	PPP1R15A	protein_coding	19	48872392	48876057	1
ENSG00000168300	0.739669	2.57e-10	4.19e-09	PCMTD1	protein_coding	8	51817575	51899186	-1
ENSG00000170175	1.04434	2.63e-10	4.28e-09	CHRNB1	protein_coding	17	7445061	7457707	1
ENSG00000130775	1.56686	3.24e-10	5.23e-09	THEMIS2	protein_coding	1	27872543	27886685	1
ENSG00000160469	1.13203	3.27e-10	5.26e-09	BRSK1	protein_coding	19	55282072	55312533	1
ENSG00000039560	0.58091	3.41e-10	5.48e-09	RAI14	protein_coding	5	34656237	34832627	1
ENSG00000185522	1.18425	3.47e-10	5.55e-09	LMNTD2	protein_coding	11	554855	560779	-1
ENSG00000095752	0.615354	3.47e-10	5.56e-09	IL11	protein_coding	19	55364389	55370463	-1
ENSG00000140450	1.61934	3.82e-10	6.11e-09	ARRDC4	protein_coding	15	97960698	97973838	1
ENSG00000232324	1.66353	3.83e-10	6.12e-09	AC008440.3	lincRNA	19	53864763	53866140	1
ENSG00000131018	0.697756	3.84e-10	6.13e-09	SYNE1	protein_coding	6	152121684	152637801	-1
ENSG00000166446	2.75813	4.14e-10	6.58e-09	CDYL2	protein_coding	16	80597906	80804329	-1
ENSG00000160471	3.09124	4.19e-10	6.64e-09	COX6B2	protein_coding	19	55349306	55354814	-1
ENSG00000125895	1.71576	4.26e-10	6.73e-09	TMEM74B	protein_coding	20	1180561	1185415	-1
ENSG00000005700	0.581683	4.68e-10	7.37e-09	IBTK	protein_coding	6	82169983	82247754	-1
ENSG00000124785	2.57605	4.75e-10	7.46e-09	NRN1	protein_coding	6	5997999	6007605	-1
ENSG00000112406	0.85571	4.87e-10	7.63e-09	HECA	protein_coding	6	139135112	139180802	1
ENSG00000103647	1.5345	4.89e-10	7.66e-09	CORO2B	protein_coding	15	68578969	68727806	1
ENSG00000282849	1.6871	5.03e-10	7.87e-09	AL359834.1	lincRNA	1	200478020	200483604	-1
ENSG00000150630	0.631626	5.04e-10	7.87e-09	VEGFC	protein_coding	4	176683538	176792727	-1
ENSG00000026751	2.04949	5.11e-10	7.97e-09	SLAMF7	protein_coding	1	160739057	160754821	1
ENSG00000078114	0.984841	5.22e-10	8.11e-09	NEBL	protein_coding	10	20779973	21174187	-1
ENSG00000142549	4.13792	5.72e-10	8.83e-09	IGLON5	protein_coding	19	51311848	51330354	1
ENSG00000125740	2.13745	5.86e-10	9.04e-09	FOSB	protein_coding	19	45467995	45475179	1
ENSG00000182158	0.739314	5.97e-10	9.19e-09	CREB3L2	protein_coding	7	137874979	138002067	-1
ENSG00000177675	1.0844	6.07e-10	9.32e-09	CD163L1	protein_coding	12	7346685	7479897	-1
ENSG00000186567	0.884322	6.56e-10	1.01e-08	CEACAM19	protein_coding	19	44662278	44684359	1
ENSG00000182685	0.979568	7.23e-10	1.1e-08	BRICD5	protein_coding	16	2209253	2211950	-1
ENSG00000159733	0.800471	7.41e-10	1.13e-08	ZFYVE28	protein_coding	4	2269582	2418663	-1
ENSG00000089723	0.6355	7.56e-10	1.15e-08	OTUB2	protein_coding	14	94026329	94048930	1
ENSG00000146858	0.679554	7.95e-10	1.2e-08	ZC3HAV1L	protein_coding	7	139025706	139036029	-1
ENSG00000120708	0.758027	8.01e-10	1.21e-08	TGFBI	protein_coding	5	136028895	136063818	1
ENSG00000231274	1.13078	8.31e-10	1.25e-08	SBK3	protein_coding	19	55540656	55545543	-1
ENSG00000115935	0.784747	8.37e-10	1.26e-08	WIPF1	protein_coding	2	174559572	174682916	-1
ENSG00000176018	0.610643	1.07e-09	1.58e-08	LYSMD3	protein_coding	5	90515611	90529584	-1
ENSG00000135842	0.957235	1.12e-09	1.66e-08	FAM129A	protein_coding	1	184790724	184974550	-1
ENSG00000146205	1.16553	1.15e-09	1.7e-08	ANO7	protein_coding	2	241188509	241225377	1
ENSG00000196083	0.964275	1.21e-09	1.79e-08	IL1RAP	protein_coding	3	190514051	190659750	1
ENSG00000129422	1.45253	1.29e-09	1.89e-08	MTUS1	protein_coding	8	17643795	17800917	-1
ENSG00000261594	2.33339	1.35e-09	1.98e-08	TPBGL	protein_coding	11	75240905	75243697	1
ENSG00000213199	1.00185	1.37e-09	1.99e-08	ASIC3	protein_coding	7	151048292	151052756	1
ENSG00000115963	0.775404	1.5e-09	2.17e-08	RND3	protein_coding	2	150468195	150539011	-1
ENSG00000234498	0.994247	1.73e-09	2.48e-08	RPL13AP20	processed_pseudogene	12	12875499	12876107	1
ENSG00000031003	0.762314	1.76e-09	2.52e-08	FAM13B	protein_coding	5	137937960	138051961	-1
ENSG00000090006	0.685424	1.88e-09	2.68e-08	LTBP4	protein_coding	19	40592883	40629818	1
ENSG00000197989	0.620827	1.98e-09	2.82e-08	SNHG12	antisense	1	28578538	28583132	-1
ENSG00000272870	1.89113	2.04e-09	2.89e-08	AC097534.2	antisense	4	173363780	173370446	-1
ENSG00000172638	1.58841	2.11e-09	2.98e-08	EFEMP2	protein_coding	11	65866441	65873592	-1
ENSG00000279689	1.45315	2.18e-09	3.08e-08	AC022400.8	TEC	10	73769264	73772862	-1
ENSG00000100003	0.851886	2.2e-09	3.1e-08	SEC14L2	protein_coding	22	30396857	30425317	1
ENSG00000186868	1.30728	2.41e-09	3.37e-08	MAPT	protein_coding	17	45894382	46028334	1
ENSG00000132334	0.858668	2.62e-09	3.67e-08	PTPRE	protein_coding	10	127907061	128085855	1
ENSG00000020577	0.704304	2.64e-09	3.68e-08	SAMD4A	protein_coding	14	54567097	54793315	1
ENSG00000091428	2.10988	3.21e-09	4.44e-08	RAPGEF4	protein_coding	2	172735274	173052893	1
ENSG00000257913	1.23627	3.29e-09	4.54e-08	DDN-AS1	antisense	12	48998367	49019235	1
ENSG00000249673	0.696134	3.36e-09	4.61e-08	NOP14-AS1	antisense	4	2934899	2961738	1
ENSG00000123595	0.640235	3.44e-09	4.72e-08	RAB9A	protein_coding	X	13689125	13710506	1
ENSG00000171606	0.645331	3.64e-09	4.97e-08	ZNF274	protein_coding	19	58183029	58213562	1
ENSG00000116254	0.944189	3.76e-09	5.13e-08	CHD5	protein_coding	1	6101793	6180123	-1
ENSG00000257732	1.21401	3.77e-09	5.14e-08	AC089983.1	antisense	12	104262314	104280722	-1
ENSG00000214944	0.630576	3.95e-09	5.34e-08	ARHGEF28	protein_coding	5	73626158	73941993	1
ENSG00000031081	0.806522	4.37e-09	5.87e-08	ARHGAP31	protein_coding	3	119294373	119420714	1
ENSG00000185561	1.12445	4.66e-09	6.24e-08	TLCD2	protein_coding	17	1702790	1710438	-1
ENSG00000267757	0.896386	4.72e-09	6.31e-08	EML2-AS1	processed_transcript	19	45641494	45642840	1
ENSG00000251432	1.46531	5.01e-09	6.67e-08	AC108062.1	lincRNA	4	128292751	128519394	1
ENSG00000124508	0.688514	5.05e-09	6.72e-08	BTN2A2	protein_coding	6	26383096	26394874	1
ENSG00000156711	0.989367	5.81e-09	7.65e-08	MAPK13	protein_coding	6	36127809	36144524	1
ENSG00000087250	4.21544	5.96e-09	7.85e-08	MT3	protein_coding	16	56589074	56591088	1
ENSG00000184545	1.32149	6.02e-09	7.92e-08	DUSP8	protein_coding	11	1554044	1571920	-1
ENSG00000124224	1.04153	6.16e-09	8.09e-08	PPP4R1L	transcribed_unprocessed_pseudogene	20	58228940	58309439	-1
ENSG00000179532	0.764498	6.3e-09	8.27e-08	DNHD1	protein_coding	11	6497260	6593758	1
ENSG00000182600	1.08723	7.16e-09	9.33e-08	SNORC	protein_coding	2	232857270	232878708	1
ENSG00000240225	0.675768	7.23e-09	9.41e-08	ZNF542P	transcribed_unprocessed_pseudogene	19	56368099	56379828	1
ENSG00000228288	1.58385	7.87e-09	1.02e-07	PCAT6	antisense	1	202810954	202812156	1
ENSG00000048052	0.844504	9.8e-09	1.26e-07	HDAC9	protein_coding	7	18086949	19002416	1
ENSG00000153234	0.801129	1.03e-08	1.31e-07	NR4A2	protein_coding	2	156324432	156342348	-1
ENSG00000244165	0.849138	1.06e-08	1.35e-07	P2RY11	protein_coding	19	10111538	10115372	1
ENSG00000067840	1.03837	1.09e-08	1.39e-07	PDZD4	protein_coding	X	153802166	153830565	-1
ENSG00000126870	0.607955	1.11e-08	1.41e-07	WDR60	protein_coding	7	158856578	158956747	1
ENSG00000245522	1.02613	1.12e-08	1.42e-07	AC026250.1	lincRNA	11	9754770	9759533	-1
ENSG00000235194	0.685197	1.31e-08	1.64e-07	PPP1R3E	protein_coding	14	23295643	23302848	-1
ENSG00000101751	0.602968	1.32e-08	1.65e-07	POLI	protein_coding	18	54269404	54321266	1
ENSG00000167103	1.2718	1.34e-08	1.68e-07	PIP5KL1	protein_coding	9	127920879	127930797	-1
ENSG00000118473	2.50618	1.4e-08	1.75e-07	SGIP1	protein_coding	1	66533383	66748299	1
ENSG00000104953	1.26489	1.45e-08	1.8e-07	TLE6	protein_coding	19	2977446	2995184	1
ENSG00000188177	1.2273	1.54e-08	1.91e-07	ZC3H6	protein_coding	2	112275594	112340063	1
ENSG00000205755	2.19198	1.55e-08	1.92e-07	CRLF2	protein_coding	X	1187549	1212750	-1
ENSG00000160781	1.21499	1.57e-08	1.94e-07	PAQR6	protein_coding	1	156243321	156248117	-1
ENSG00000164938	0.769353	1.61e-08	1.98e-07	TP53INP1	protein_coding	8	94925972	94949411	-1
ENSG00000145358	1.39673	1.64e-08	2.02e-07	DDIT4L	protein_coding	4	100185870	100190782	-1
ENSG00000196415	2.73669	1.65e-08	2.03e-07	PRTN3	protein_coding	19	840960	848175	1
ENSG00000134548	1.12414	1.83e-08	2.24e-07	SPX	protein_coding	12	21526307	21541249	1
ENSG00000263535	2.10373	1.85e-08	2.26e-07	AK4P1	processed_pseudogene	17	31345519	31346190	1
ENSG00000008300	0.621055	1.89e-08	2.29e-07	CELSR3	protein_coding	3	48636469	48662915	-1
ENSG00000161249	1.10795	1.94e-08	2.36e-07	DMKN	protein_coding	19	35497220	35513658	-1
ENSG00000196218	1.48844	2.13e-08	2.56e-07	RYR1	protein_coding	19	38433699	38587564	1
ENSG00000072832	1.64155	2.19e-08	2.61e-07	CRMP1	protein_coding	4	5748084	5893058	-1
ENSG00000081052	1.44883	2.26e-08	2.7e-07	COL4A4	protein_coding	2	227002711	227164453	-1
ENSG00000137474	0.735472	2.42e-08	2.88e-07	MYO7A	protein_coding	11	77128264	77215241	1
ENSG00000106868	0.599549	2.57e-08	3.04e-07	SUSD1	protein_coding	9	112040785	112175408	-1
ENSG00000196975	0.654951	2.58e-08	3.05e-07	ANXA4	protein_coding	2	69644425	69827100	1
ENSG00000197872	1.17903	2.64e-08	3.11e-07	FAM49A	protein_coding	2	16549459	16666331	-1
ENSG00000062038	1.68637	2.67e-08	3.14e-07	CDH3	protein_coding	16	68636189	68722616	1
ENSG00000141968	0.821481	2.71e-08	3.18e-07	VAV1	protein_coding	19	6772714	6857366	1
ENSG00000181284	0.827059	2.79e-08	3.27e-07	TMEM102	protein_coding	17	7435443	7437679	1
ENSG00000129990	3.00071	3.43e-08	3.94e-07	SYT5	protein_coding	19	55171199	55180441	-1
ENSG00000230615	1.33914	3.5e-08	4.02e-07	AL139220.2	lincRNA	1	44030443	44115913	1
ENSG00000167971	1.03729	3.51e-08	4.02e-07	CASKIN1	protein_coding	16	2177180	2196525	-1
ENSG00000134698	0.603378	3.52e-08	4.04e-07	AGO4	protein_coding	1	35808172	35857890	1
ENSG00000136052	0.631753	3.59e-08	4.11e-07	SLC41A2	protein_coding	12	104802553	104958744	-1
ENSG00000001630	0.634648	3.73e-08	4.24e-07	CYP51A1	protein_coding	7	92112151	92134803	-1
ENSG00000165029	1.43939	3.9e-08	4.42e-07	ABCA1	protein_coding	9	104781002	104928237	-1
ENSG00000130294	1.90387	4e-08	4.52e-07	KIF1A	protein_coding	2	240713761	240821036	-1
ENSG00000135362	0.736083	4.11e-08	4.64e-07	PRR5L	protein_coding	11	36296288	36465204	1
ENSG00000173546	1.29282	4.16e-08	4.69e-07	CSPG4	protein_coding	15	75674322	75712848	-1
ENSG00000131981	0.58831	4.15e-08	4.69e-07	LGALS3	protein_coding	14	55124110	55145413	1
ENSG00000125744	1.09078	4.24e-08	4.78e-07	RTN2	protein_coding	19	45485289	45497061	-1
ENSG00000078177	0.730442	4.89e-08	5.46e-07	N4BP2	protein_coding	4	40056826	40158252	1
ENSG00000005238	0.625317	5.14e-08	5.7e-07	FAM214B	protein_coding	9	35104112	35116341	-1
ENSG00000106701	0.698569	5.4e-08	5.95e-07	FSD1L	protein_coding	9	105447796	105552433	1
ENSG00000181007	0.617097	5.4e-08	5.95e-07	ZFP82	protein_coding	19	36383120	36418656	-1
ENSG00000162520	1.00115	5.87e-08	6.46e-07	SYNC	protein_coding	1	32680360	32703596	-1
ENSG00000205593	1.2449	5.99e-08	6.58e-07	DENND6B	protein_coding	22	50309030	50327060	-1
ENSG00000122641	2.19087	6.03e-08	6.62e-07	INHBA	protein_coding	7	41667168	41705834	-1
ENSG00000258667	4.73735	6.38e-08	6.98e-07	HIF1A-AS2	lincRNA	14	61715558	61751097	-1
ENSG00000054654	0.71598	6.44e-08	7.02e-07	SYNE2	protein_coding	14	63852983	64226433	1
ENSG00000136383	1.50488	6.94e-08	7.53e-07	ALPK3	protein_coding	15	84816680	84873482	1
ENSG00000127946	0.639009	7.16e-08	7.76e-07	HIP1	protein_coding	7	75533300	75738962	-1
ENSG00000162241	0.865871	7.53e-08	8.11e-07	SLC25A45	protein_coding	11	65375192	65383701	-1
ENSG00000120738	1.55187	7.95e-08	8.53e-07	EGR1	protein_coding	5	138465490	138469315	1
ENSG00000240032	1.56438	8.53e-08	9.12e-07	LNCSRLR	antisense	3	146066344	146069185	-1
ENSG00000138641	0.95323	8.6e-08	9.18e-07	HERC3	protein_coding	4	88592423	88708542	1
ENSG00000105419	1.13539	8.84e-08	9.42e-07	MEIS3	protein_coding	19	47403124	47419523	-1
ENSG00000230432	7.31422	9.05e-08	9.62e-07	AC114803.1	antisense	2	219299002	219304130	1
ENSG00000169583	1.56223	9.16e-08	9.72e-07	CLIC3	protein_coding	9	136994635	136996803	-1
ENSG00000186907	1.20221	9.44e-08	1e-06	RTN4RL2	protein_coding	11	57460549	57477534	1
ENSG00000196611	3.94754	1e-07	1.06e-06	MMP1	protein_coding	11	102789920	102798160	-1
ENSG00000159208	2.59919	1.01e-07	1.06e-06	CIART	protein_coding	1	150282543	150287093	1
ENSG00000197557	0.600792	1.04e-07	1.09e-06	TTC30A	protein_coding	2	177612992	177618966	-1
ENSG00000184227	0.758653	1.14e-07	1.19e-06	ACOT1	protein_coding	14	73537114	73543794	1
ENSG00000123689	1.66909	1.15e-07	1.2e-06	G0S2	protein_coding	1	209675420	209676388	1
ENSG00000006606	1.27944	1.15e-07	1.2e-06	CCL26	protein_coding	7	75769533	75789896	-1
ENSG00000123095	0.719373	1.16e-07	1.2e-06	BHLHE41	protein_coding	12	26120026	26125127	-1
ENSG00000146555	1.27228	1.22e-07	1.26e-06	SDK1	protein_coding	7	3301448	4269000	1
ENSG00000166924	2.06166	1.35e-07	1.39e-06	NYAP1	protein_coding	7	100483927	100494799	1
ENSG00000146094	0.736511	1.37e-07	1.41e-06	DOK3	protein_coding	5	177501907	177511274	-1
ENSG00000279095	0.625144	1.38e-07	1.42e-06	AC243964.3	TEC	19	44664131	44666158	1
ENSG00000253882	7.24595	1.58e-07	1.61e-06	AC099548.2	transcribed_unprocessed_pseudogene	7	143761790	143836933	-1
ENSG00000164949	0.697819	1.68e-07	1.7e-06	GEM	protein_coding	8	94249253	94262350	-1
ENSG00000072818	2.25583	1.76e-07	1.77e-06	ACAP1	protein_coding	17	7336529	7351478	1
ENSG00000164181	0.711409	1.81e-07	1.83e-06	ELOVL7	protein_coding	5	60751791	60844389	-1
ENSG00000186994	1.42759	1.88e-07	1.89e-06	KANK3	protein_coding	19	8322584	8343262	-1
ENSG00000186642	1.34342	2.02e-07	2.02e-06	PDE2A	protein_coding	11	72576141	72674591	-1
ENSG00000159110	0.664584	2.14e-07	2.12e-06	IFNAR2	protein_coding	21	33229901	33265675	1
ENSG00000163121	1.71283	2.15e-07	2.14e-06	NEURL3	protein_coding	2	96497643	96508109	-1
ENSG00000139178	0.718829	2.37e-07	2.33e-06	C1RL	protein_coding	12	7089587	7109273	-1
ENSG00000171766	0.700677	2.58e-07	2.53e-06	GATM	protein_coding	15	45361124	45402327	-1
ENSG00000204540	1.275	2.6e-07	2.54e-06	PSORS1C1	protein_coding	6	31114750	31140092	1
ENSG00000188211	0.660854	2.61e-07	2.54e-06	NCR3LG1	protein_coding	11	17351726	17377341	1
ENSG00000276141	0.660408	2.6e-07	2.54e-06	WHAMMP3	transcribed_unprocessed_pseudogene	15	22664359	22686213	1
ENSG00000225377	1.10181	2.64e-07	2.57e-06	NRSN2-AS1	antisense	20	320313	348224	-1
ENSG00000177875	1.04399	2.66e-07	2.59e-06	CCDC184	protein_coding	12	48183584	48185926	1
ENSG00000134533	2.1727	2.72e-07	2.64e-06	RERG	protein_coding	12	15107783	15348675	-1
ENSG00000154319	1.20123	2.83e-07	2.73e-06	FAM167A	protein_coding	8	11421463	11475908	-1
ENSG00000165215	1.03652	2.91e-07	2.81e-06	CLDN3	protein_coding	7	73768997	73770270	-1
ENSG00000067191	0.800666	2.97e-07	2.87e-06	CACNB1	protein_coding	17	39173456	39197703	-1
ENSG00000267858	0.720293	3.16e-07	3.03e-06	MZF1-AS1	antisense	19	58559129	58574797	1
ENSG00000128881	0.604466	3.2e-07	3.06e-06	TTBK2	protein_coding	15	42738734	42920809	-1
ENSG00000040608	0.693386	3.28e-07	3.13e-06	RTN4R	protein_coding	22	20241415	20283246	-1
ENSG00000094841	0.581775	3.37e-07	3.21e-06	UPRT	protein_coding	X	75274085	75304600	1
ENSG00000132357	0.775964	3.51e-07	3.34e-06	CARD6	protein_coding	5	40841184	40860175	1
ENSG00000162039	2.10854	3.59e-07	3.4e-06	MEIOB	protein_coding	16	1833987	1884294	-1
ENSG00000266088	1.04505	3.67e-07	3.47e-06	AC004585.1	lincRNA	17	40517026	40527002	1
ENSG00000224596	2.22134	3.92e-07	3.69e-06	ZMIZ1-AS1	antisense	10	78943328	79067895	-1
ENSG00000140009	1.9787	4.36e-07	4.06e-06	ESR2	protein_coding	14	64084232	64338112	-1
ENSG00000177465	0.861221	4.46e-07	4.14e-06	ACOT4	protein_coding	14	73591706	73596496	1
ENSG00000214110	1.12868	4.56e-07	4.22e-06	LDHAP4	processed_pseudogene	9	14921337	14922334	-1
ENSG00000143382	1.007	4.94e-07	4.54e-06	ADAMTSL4	protein_coding	1	150549369	150560937	1
ENSG00000132031	0.937001	5.05e-07	4.62e-06	MATN3	protein_coding	2	19992111	20012694	-1
ENSG00000118515	0.60919	5.07e-07	4.64e-06	SGK1	protein_coding	6	134169246	134318112	-1
ENSG00000164855	0.640438	5.16e-07	4.71e-06	TMEM184A	protein_coding	7	1542235	1560821	-1
ENSG00000067992	0.741029	5.27e-07	4.81e-06	PDK3	protein_coding	X	24465221	24541862	1
ENSG00000172071	0.659704	5.44e-07	4.94e-06	EIF2AK3	protein_coding	2	88556741	88627576	-1
ENSG00000143590	1.40117	5.67e-07	5.14e-06	EFNA3	protein_coding	1	155078872	155087538	1
ENSG00000130508	0.634433	5.7e-07	5.16e-06	PXDN	protein_coding	2	1631887	1744852	-1
ENSG00000176928	0.869749	5.88e-07	5.32e-06	GCNT4	protein_coding	5	75025346	75030899	-1
ENSG00000049249	1.65964	6.19e-07	5.58e-06	TNFRSF9	protein_coding	1	7915894	7943165	-1
ENSG00000205885	0.725148	6.21e-07	5.59e-06	C1RL-AS1	antisense	12	7108052	7122501	1
ENSG00000188290	0.606957	6.29e-07	5.65e-06	HES4	protein_coding	1	998962	1000172	-1
ENSG00000161642	0.880119	6.68e-07	5.98e-06	ZNF385A	protein_coding	12	54369133	54391298	-1
ENSG00000099999	0.624408	6.68e-07	5.98e-06	RNF215	protein_coding	22	30368811	30421771	-1
ENSG00000164171	1.28065	6.83e-07	6.1e-06	ITGA2	protein_coding	5	52989326	53094779	1
ENSG00000171533	1.4529	7.06e-07	6.29e-06	MAP6	protein_coding	11	75586918	75669120	-1
ENSG00000121966	4.01003	7.28e-07	6.48e-06	CXCR4	protein_coding	2	136114349	136118165	-1
ENSG00000259291	1.14774	7.63e-07	6.74e-06	ZNF710-AS1	antisense	15	90074512	90082207	-1
ENSG00000054938	2.38352	8.46e-07	7.41e-06	CHRDL2	protein_coding	11	74696429	74731385	-1
ENSG00000237686	0.925867	9.23e-07	8.03e-06	AL109615.3	antisense	6	43995723	44074652	-1
ENSG00000135525	0.655808	9.57e-07	8.29e-06	MAP7	protein_coding	6	136342281	136550819	-1
ENSG00000048740	1.22645	9.84e-07	8.5e-06	CELF2	protein_coding	10	10798397	11336675	1
ENSG00000172426	1.86541	1.05e-06	9e-06	RSPH9	protein_coding	6	43645046	43672599	1
ENSG00000164509	0.826965	1.1e-06	9.44e-06	IL31RA	protein_coding	5	55851379	55922853	1
ENSG00000153294	0.884795	1.12e-06	9.55e-06	ADGRF4	protein_coding	6	47685864	47722021	1
ENSG00000185519	0.684159	1.19e-06	1.01e-05	FAM131C	protein_coding	1	16057769	16073632	-1
ENSG00000134986	1.50135	1.21e-06	1.02e-05	NREP	protein_coding	5	111662621	111997464	-1
ENSG00000008513	0.600538	1.21e-06	1.02e-05	ST3GAL1	protein_coding	8	133454848	133571940	-1
ENSG00000186862	1.28868	1.23e-06	1.04e-05	PDZD7	protein_coding	10	101007683	101032295	-1
ENSG00000074660	2.20225	1.31e-06	1.11e-05	SCARF1	protein_coding	17	1633858	1645747	-1
ENSG00000145014	0.757657	1.34e-06	1.13e-05	TMEM44	protein_coding	3	194587673	194633689	-1
ENSG00000134594	2.25519	1.35e-06	1.14e-05	RAB33A	protein_coding	X	130171649	130184870	1
ENSG00000162194	0.589097	1.35e-06	1.14e-05	LBHD1	protein_coding	11	62662817	62672255	-1
ENSG00000169418	1.38648	1.38e-06	1.16e-05	NPR1	protein_coding	1	153678637	153693992	1
ENSG00000204758	0.911238	1.42e-06	1.19e-05	AC008429.1	antisense	5	172954786	172959392	-1
ENSG00000048471	0.60473	1.53e-06	1.27e-05	SNX29	protein_coding	16	11976737	12574289	1
ENSG00000112096	1.20816	1.55e-06	1.29e-05	SOD2	protein_coding	6	159669057	159745186	-1
ENSG00000126368	0.600715	1.59e-06	1.32e-05	NR1D1	protein_coding	17	40092787	40100725	-1
ENSG00000256940	0.701091	1.6e-06	1.33e-05	AP001453.2	antisense	11	64245964	64248217	1
ENSG00000127578	2.21074	1.71e-06	1.4e-05	WFIKKN1	protein_coding	16	629239	634116	1
ENSG00000138769	1.50554	1.7e-06	1.4e-05	CDKL2	protein_coding	4	75578005	75630716	-1
ENSG00000225828	0.72401	1.74e-06	1.43e-05	FAM229A	protein_coding	1	32361270	32364278	-1
ENSG00000144843	0.928121	1.75e-06	1.44e-05	ADPRH	protein_coding	3	119579268	119589945	1
ENSG00000138675	0.870433	1.84e-06	1.5e-05	FGF5	protein_coding	4	80266599	80336680	1
ENSG00000099377	0.659491	1.85e-06	1.51e-05	HSD3B7	protein_coding	16	30985207	30989152	1
ENSG00000183208	0.898862	1.98e-06	1.6e-05	GDPGP1	protein_coding	15	90233808	90245811	1
ENSG00000141622	1.69222	1.99e-06	1.61e-05	RNF165	protein_coding	18	46326809	46463140	1
ENSG00000132950	0.619954	2.08e-06	1.67e-05	ZMYM5	protein_coding	13	19823482	19863636	-1
ENSG00000116584	0.617084	2.09e-06	1.68e-05	ARHGEF2	protein_coding	1	155946851	156007070	-1
ENSG00000167397	0.645586	2.2e-06	1.76e-05	VKORC1	protein_coding	16	31090842	31095980	-1
ENSG00000187266	0.703664	2.24e-06	1.79e-05	EPOR	protein_coding	19	11377205	11384342	-1
ENSG00000142319	2.95614	2.26e-06	1.8e-05	SLC6A3	protein_coding	5	1392790	1445430	-1
ENSG00000169359	0.615328	2.42e-06	1.92e-05	SLC33A1	protein_coding	3	155821024	155854456	-1
ENSG00000204128	0.792575	2.62e-06	2.07e-05	C2orf72	protein_coding	2	231037490	231049719	1
ENSG00000197358	2.08095	2.77e-06	2.17e-05	BNIP3P1	transcribed_processed_pseudogene	14	28264390	28265974	1
ENSG00000196867	0.813038	2.76e-06	2.17e-05	ZFP28	protein_coding	19	56538948	56556810	1
ENSG00000169242	0.596037	3.03e-06	2.36e-05	EFNA1	protein_coding	1	155127460	155134857	1
ENSG00000065485	0.672612	3.13e-06	2.42e-05	PDIA5	protein_coding	3	123067062	123225227	1
ENSG00000199038	3.26958	3.21e-06	2.48e-05	MIR210	miRNA	11	568089	568198	-1
ENSG00000105270	0.900565	3.26e-06	2.51e-05	CLIP3	protein_coding	19	36014660	36033343	-1
ENSG00000228486	1.78417	3.31e-06	2.54e-05	C2orf92	protein_coding	2	97664217	97703064	1
ENSG00000041880	0.716003	3.39e-06	2.6e-05	PARP3	protein_coding	3	51942345	51948867	1
ENSG00000229245	1.46115	3.43e-06	2.63e-05	AL359636.1	antisense	9	122403407	122448977	1
ENSG00000159753	1.43717	3.44e-06	2.63e-05	CARMIL2	protein_coding	16	67644919	67657569	1
ENSG00000182782	3.77579	3.46e-06	2.65e-05	HCAR2	protein_coding	12	122701293	122703343	-1
ENSG00000065609	1.47486	3.57e-06	2.72e-05	SNAP91	protein_coding	6	83552880	83709691	-1
ENSG00000186792	0.838736	3.72e-06	2.82e-05	HYAL3	protein_coding	3	50292831	50299468	-1
ENSG00000006756	0.643128	3.73e-06	2.83e-05	ARSD	protein_coding	X	2903970	2929351	-1
ENSG00000132359	1.04462	3.75e-06	2.84e-05	RAP1GAP2	protein_coding	17	2755705	3037739	1
ENSG00000184860	0.585557	4.18e-06	3.13e-05	SDR42E1	protein_coding	16	81988855	82011488	-1
ENSG00000171174	0.697343	4.2e-06	3.15e-05	RBKS	protein_coding	2	27781364	27891098	-1
ENSG00000274290	0.712567	4.35e-06	3.24e-05	HIST1H2BE	protein_coding	6	26172059	26184655	1
ENSG00000151090	0.602014	4.34e-06	3.24e-05	THRB	protein_coding	3	24117153	24495756	-1
ENSG00000180720	2.43452	4.49e-06	3.33e-05	CHRM4	protein_coding	11	46385098	46386608	-1
ENSG00000276851	1.25754	4.56e-06	3.39e-05	AC002401.4	lincRNA	17	50094065	50094647	1
ENSG00000139112	0.651385	4.61e-06	3.41e-05	GABARAPL1	protein_coding	12	10212458	10223130	1
ENSG00000114993	0.60909	4.64e-06	3.43e-05	RTKN	protein_coding	2	74425836	74442422	-1
ENSG00000215788	0.809179	4.78e-06	3.53e-05	TNFRSF25	protein_coding	1	6460786	6466195	-1
ENSG00000072163	1.16323	4.9e-06	3.61e-05	LIMS2	protein_coding	2	127638381	127681786	-1
ENSG00000248807	1.71554	4.93e-06	3.63e-05	KRTAP9-12P	unprocessed_pseudogene	17	41212706	41213237	1
ENSG00000144119	6.41199	5.05e-06	3.72e-05	C1QL2	protein_coding	2	119156243	119158889	-1
ENSG00000236404	1.54305	5.07e-06	3.73e-05	VLDLR-AS1	antisense	9	2421597	2643359	-1
ENSG00000101670	1.50434	5.13e-06	3.77e-05	LIPG	protein_coding	18	49560699	49599182	1
ENSG00000235831	1.83473	5.65e-06	4.11e-05	BHLHE40-AS1	antisense	3	4896809	4979961	-1
ENSG00000169894	1.84149	5.73e-06	4.16e-05	MUC3A	protein_coding	7	100949555	100968346	1
ENSG00000133874	0.925609	5.74e-06	4.17e-05	RNF122	protein_coding	8	33547755	33567125	-1
ENSG00000163013	0.717969	5.92e-06	4.29e-05	FBXO41	protein_coding	2	73254682	73284431	-1
ENSG00000147614	2.07475	6.24e-06	4.5e-05	ATP6V0D2	protein_coding	8	85987323	86154228	1
ENSG00000171223	0.619537	6.57e-06	4.72e-05	JUNB	protein_coding	19	12791496	12793315	1
ENSG00000152503	1.07025	7.04e-06	5.02e-05	TRIM36	protein_coding	5	115124762	115180546	-1
ENSG00000176399	0.802694	7.05e-06	5.02e-05	DMRTA1	protein_coding	9	22446841	22455740	1
ENSG00000250697	1.28135	7.27e-06	5.17e-05	AC010343.3	lincRNA	5	32925639	33297910	-1
ENSG00000091513	2.43207	7.36e-06	5.22e-05	TF	protein_coding	3	133745956	133796640	1
ENSG00000183691	2.02099	7.46e-06	5.29e-05	NOG	protein_coding	17	56593699	56595590	1
ENSG00000125910	2.40883	7.52e-06	5.32e-05	S1PR4	protein_coding	19	3172346	3180332	1
ENSG00000197608	0.70382	7.68e-06	5.42e-05	ZNF841	protein_coding	19	52064466	52095765	-1
ENSG00000160233	0.952213	7.92e-06	5.58e-05	LRRC3	protein_coding	21	44455486	44462196	1
ENSG00000142046	0.830265	8.32e-06	5.84e-05	TMEM91	protein_coding	19	41350911	41384083	1
ENSG00000197128	0.663985	8.38e-06	5.87e-05	ZNF772	protein_coding	19	57466663	57477570	-1
ENSG00000168477	0.858974	8.46e-06	5.92e-05	TNXB	protein_coding	6	32041153	32115334	-1
ENSG00000070759	1.2004	8.53e-06	5.97e-05	TESK2	protein_coding	1	45343883	45491166	-1
ENSG00000224189	1.06705	9.27e-06	6.44e-05	HAGLR	antisense	2	176164051	176188958	-1
ENSG00000188747	0.76474	9.94e-06	6.85e-05	NOXA1	protein_coding	9	137423350	137434406	1
ENSG00000103522	1.74886	1.03e-05	7.05e-05	IL21R	protein_coding	16	27402162	27452042	1
ENSG00000198417	1.10985	1.09e-05	7.43e-05	MT1F	protein_coding	16	56657694	56660698	1
ENSG00000135253	1.28239	1.16e-05	7.9e-05	KCP	protein_coding	7	128862451	128910719	-1
ENSG00000066248	0.691426	1.22e-05	8.24e-05	NGEF	protein_coding	2	232878686	233013272	-1
ENSG00000142661	0.673805	1.23e-05	8.31e-05	MYOM3	protein_coding	1	24056035	24112175	-1
ENSG00000154153	0.806706	1.26e-05	8.54e-05	RETREG1	protein_coding	5	16473038	16617058	-1
ENSG00000176490	0.63728	1.36e-05	9.14e-05	DIRAS1	protein_coding	19	2714567	2721418	-1
ENSG00000111860	0.66895	1.41e-05	9.4e-05	CEP85L	protein_coding	6	118460772	118710075	-1
ENSG00000177283	0.851315	1.43e-05	9.53e-05	FZD8	protein_coding	10	35638249	35642278	-1
ENSG00000090238	0.716215	1.44e-05	9.57e-05	YPEL3	protein_coding	16	30092314	30096915	-1
ENSG00000002079	1.17513	1.47e-05	9.74e-05	MYH16	transcribed_unitary_pseudogene	7	99238829	99311130	1
ENSG00000101115	0.893484	1.49e-05	9.86e-05	SALL4	protein_coding	20	51782331	51802520	-1
ENSG00000276445	1.18776	1.5e-05	9.95e-05	AC005393.1	lincRNA	19	39812972	39813555	-1
ENSG00000197279	0.930643	1.52e-05	0.000100628	ZNF165	protein_coding	6	28080975	28089563	1
ENSG00000174428	0.780594	1.57e-05	0.000103794	GTF2IRD2B	protein_coding	7	75092573	75149817	1
ENSG00000121905	1.94835	1.58e-05	0.000104406	HPCA	protein_coding	1	32885994	32898441	1
ENSG00000235601	1.99594	1.58e-05	0.000104415	BARX1-DT	lincRNA	9	93955597	93959140	1
ENSG00000198855	0.767256	1.58e-05	0.000104466	FICD	protein_coding	12	108515185	108525837	1
ENSG00000261051	1.02004	1.61e-05	0.000106184	AC107021.2	sense_overlapping	3	146059585	146061679	-1
ENSG00000101335	0.826026	1.62e-05	0.000106472	MYL9	protein_coding	20	36541484	36551447	1
ENSG00000234678	0.921074	1.66e-05	0.000108782	ELF3-AS1	antisense	1	201995696	202010463	-1
ENSG00000253616	1.03117	1.67e-05	0.000109397	AC107959.3	antisense	8	23071377	23074488	-1
ENSG00000279117	1.20308	1.68e-05	0.000110355	AP001972.5	TEC	11	75260129	75262466	-1
ENSG00000230836	1.51345	1.69e-05	0.000110976	LINC01293	lincRNA	2	74940258	74942670	1
ENSG00000138131	1.2083	1.71e-05	0.000111885	LOXL4	protein_coding	10	98247690	98268250	-1
ENSG00000101842	2.19346	1.71e-05	0.000111917	VSIG1	protein_coding	X	108044970	108079184	1
ENSG00000128965	0.749074	1.73e-05	0.000112836	CHAC1	protein_coding	15	40952962	40956519	1
ENSG00000154493	0.956001	1.74e-05	0.000113977	C10orf90	protein_coding	10	126424997	126670446	-1
ENSG00000171680	0.603428	1.75e-05	0.000114008	PLEKHG5	protein_coding	1	6466092	6520061	-1
ENSG00000203721	1.45174	1.76e-05	0.000115081	LINC00862	lincRNA	1	200253419	200400705	-1
ENSG00000272482	1.65796	1.83e-05	0.000118705	AC254633.1	lincRNA	1	12618900	12619244	-1
ENSG00000145687	0.90866	1.84e-05	0.000119358	SSBP2	protein_coding	5	81413021	81751797	-1
ENSG00000167619	0.885157	1.88e-05	0.00012185	TMEM145	protein_coding	19	42313325	42325062	1
ENSG00000213700	1.63682	2.02e-05	0.000129411	RPL17P50	processed_pseudogene	10	73005833	73006595	-1
ENSG00000168386	6.09743	2.07e-05	0.000132212	FILIP1L	protein_coding	3	99830141	100114513	-1
ENSG00000163293	1.45048	2.08e-05	0.000132506	NIPAL1	protein_coding	4	47914142	48040173	1
ENSG00000230061	0.943742	2.12e-05	0.000135129	TRPM2-AS	antisense	21	44414588	44425272	-1
ENSG00000130529	0.628493	2.12e-05	0.000135132	TRPM4	protein_coding	19	49157741	49211836	1
ENSG00000166670	3.36183	2.14e-05	0.000136414	MMP10	protein_coding	11	102770503	102780628	-1
ENSG00000167771	0.988152	2.21e-05	0.000140157	RCOR2	protein_coding	11	63911221	63916844	-1
ENSG00000104899	0.584034	2.22e-05	0.000140434	AMH	protein_coding	19	2249309	2252073	1
ENSG00000109220	0.716257	2.22e-05	0.00014082	CHIC2	protein_coding	4	54009789	54064690	-1
ENSG00000284968	1.0379	2.24e-05	0.000141766	AC093827.4	antisense	4	86924630	86936202	-1
ENSG00000273001	1.69837	2.26e-05	0.000142863	AL731533.2	lincRNA	10	3065424	3066001	-1
ENSG00000119514	0.721779	2.4e-05	0.000151004	GALNT12	protein_coding	9	98807699	98850081	1
ENSG00000123610	2.03105	2.56e-05	0.000160116	TNFAIP6	protein_coding	2	151357592	151380048	1
ENSG00000185986	0.851034	2.59e-05	0.000161596	SDHAP3	transcribed_unprocessed_pseudogene	5	1572222	1594620	-1
ENSG00000160191	1.20374	2.62e-05	0.000162831	PDE9A	protein_coding	21	42653636	42775509	1
ENSG00000196517	0.586829	2.64e-05	0.00016419	SLC6A9	protein_coding	1	43991500	44031467	-1
ENSG00000271119	2.26479	2.82e-05	0.000174575	AC026412.3	lincRNA	5	1594626	1611467	1
ENSG00000164142	0.818346	2.93e-05	0.000180348	FAM160A1	protein_coding	4	151409216	151663632	1
ENSG00000165617	1.76636	3.05e-05	0.000187203	DACT1	protein_coding	14	58633967	58648321	1
ENSG00000169955	1.18848	3.06e-05	0.000187506	ZNF747	protein_coding	16	30530367	30535347	-1
ENSG00000237596	1.34206	3.29e-05	0.000200235	AL138828.1	antisense	6	135991936	136225751	-1
ENSG00000153283	0.91716	3.33e-05	0.000202498	CD96	protein_coding	3	111292719	111665750	1
ENSG00000163531	0.695408	3.48e-05	0.000211301	NFASC	protein_coding	1	204828651	205022822	1
ENSG00000179476	0.907094	3.52e-05	0.00021307	C14orf28	protein_coding	14	44897295	44907257	1
ENSG00000108813	0.870069	3.62e-05	0.000218425	DLX4	protein_coding	17	49968970	49974959	1
ENSG00000186472	0.839278	3.65e-05	0.000219947	PCLO	protein_coding	7	82754013	83162930	-1
ENSG00000259674	0.633125	3.67e-05	0.000220954	AC092868.1	processed_pseudogene	15	59406963	59408154	-1
ENSG00000177989	0.868189	3.68e-05	0.000221209	ODF3B	protein_coding	22	50529710	50532580	-1
ENSG00000140379	1.61091	3.94e-05	0.000236041	BCL2A1	protein_coding	15	79960889	79971446	-1
ENSG00000145850	0.951555	3.96e-05	0.00023671	TIMD4	protein_coding	5	156919282	156963255	-1
ENSG00000255346	0.924672	3.97e-05	0.000237405	NOX5	protein_coding	15	68930525	69062743	1
ENSG00000114771	0.804863	4e-05	0.000239146	AADAC	protein_coding	3	151814037	151828488	1
ENSG00000170873	1.41427	4.02e-05	0.000240159	MTSS1	protein_coding	8	124550790	124728429	-1
ENSG00000101307	1.18158	4.14e-05	0.000246386	SIRPB1	protein_coding	20	1563521	1620061	-1
ENSG00000146592	1.99597	4.23e-05	0.00025106	CREB5	protein_coding	7	28299321	28825894	1
ENSG00000128165	1.1104	4.29e-05	0.000254376	ADM2	protein_coding	22	50481556	50486440	1
ENSG00000106789	1.34797	4.43e-05	0.000261709	CORO2A	protein_coding	9	98120975	98192640	-1
ENSG00000266714	0.834223	4.49e-05	0.0002652	MYO15B	protein_coding	17	75588058	75626501	1
ENSG00000099889	0.793453	4.54e-05	0.000268039	ARVCF	protein_coding	22	19969896	20016808	-1
ENSG00000106333	0.687937	4.63e-05	0.000272836	PCOLCE	protein_coding	7	100602177	100608175	1
ENSG00000162415	0.934676	4.99e-05	0.000291075	ZSWIM5	protein_coding	1	45016399	45306209	-1
ENSG00000233822	0.809467	5.17e-05	0.000300595	HIST1H2BN	protein_coding	6	27837760	27865798	1
ENSG00000134864	0.787874	5.17e-05	0.000300595	GGACT	protein_coding	13	100530164	100589528	-1
ENSG00000277883	2.22796	5.2e-05	0.000302095	NLRP3P1	unprocessed_pseudogene	X	107974078	107985008	1
ENSG00000174567	1.19635	5.2e-05	0.000302095	GOLT1A	protein_coding	1	204198160	204214092	-1
ENSG00000277363	0.759089	5.33e-05	0.000308495	SRCIN1	protein_coding	17	38530016	38605930	-1
ENSG00000167972	1.22703	5.41e-05	0.00031228	ABCA3	protein_coding	16	2275881	2340746	-1
ENSG00000250091	1.31228	5.49e-05	0.000317142	DNAH10OS	antisense	12	123925461	123934984	-1
ENSG00000259518	2.70405	5.7e-05	0.000328083	LINC01583	lincRNA	15	82088594	82097694	1
ENSG00000174370	0.952341	5.86e-05	0.000335814	C11orf45	protein_coding	11	128899565	128906035	-1
ENSG00000179855	1.54116	5.9e-05	0.000338252	GIPC3	protein_coding	19	3585553	3593541	1
ENSG00000139364	3.13325	5.96e-05	0.000341136	TMEM132B	protein_coding	12	125186836	125662377	1
ENSG00000117009	1.18144	6.03e-05	0.000344567	KMO	protein_coding	1	241532134	241595642	1
ENSG00000183114	0.798574	6.09e-05	0.00034758	FAM43B	protein_coding	1	20552439	20555010	1
ENSG00000142459	0.703532	6.36e-05	0.000360593	EVI5L	protein_coding	19	7830233	7864976	1
ENSG00000161544	1.65065	6.47e-05	0.000366546	CYGB	protein_coding	17	76527356	76551175	-1
ENSG00000140519	1.09998	6.5e-05	0.000367964	RHCG	protein_coding	15	89471398	89496613	-1
ENSG00000163462	0.628405	6.79e-05	0.000382584	TRIM46	protein_coding	1	155173787	155184971	1
ENSG00000054356	0.804272	6.88e-05	0.000387256	PTPRN	protein_coding	2	219289623	219309648	-1
ENSG00000225489	1.29199	7.25e-05	0.000406712	AL354707.1	lincRNA	9	6716495	6727438	1
ENSG00000164616	1.07365	7.29e-05	0.00040862	FBXL21	transcribed_unitary_pseudogene	5	135930317	135951591	1
ENSG00000087085	1.76962	7.34e-05	0.000410837	ACHE	protein_coding	7	100889994	100896974	-1
ENSG00000223509	0.590666	7.42e-05	0.000415029	AC135983.2	transcribed_processed_pseudogene	15	32519848	32536926	-1
ENSG00000125355	2.94223	7.46e-05	0.000416641	TMEM255A	protein_coding	X	120258650	120311556	-1
ENSG00000178033	2.55375	7.47e-05	0.000417148	CALHM5	protein_coding	6	116511646	116524792	1
ENSG00000185101	1.42294	7.52e-05	0.000419583	ANO9	protein_coding	11	417933	442011	-1
ENSG00000239697	0.703971	7.53e-05	0.000419872	TNFSF12	protein_coding	17	7548891	7557890	1
ENSG00000140057	0.841429	7.66e-05	0.000426213	AK7	protein_coding	14	96392111	96489427	1
ENSG00000131095	0.678869	7.78e-05	0.000432285	GFAP	protein_coding	17	44903161	44916937	-1
ENSG00000116990	1.19984	7.95e-05	0.000441162	MYCL	protein_coding	1	39895426	39902256	-1
ENSG00000138356	0.601162	8e-05	0.000443689	AOX1	protein_coding	2	200585868	200677064	1
ENSG00000056558	1.25837	8.1e-05	0.000449144	TRAF1	protein_coding	9	120902393	120929173	-1
ENSG00000232133	1.55773	8.13e-05	0.000450401	IMPDH1P10	processed_pseudogene	2	201137516	201140027	-1
ENSG00000243753	1.35799	8.23e-05	0.000455558	HLA-L	transcribed_unprocessed_pseudogene	6	30259584	30293014	1
ENSG00000114646	0.96207	8.23e-05	0.000455558	CSPG5	protein_coding	3	47562239	47580792	-1
ENSG00000163536	0.622846	8.49e-05	0.000467657	SERPINI1	protein_coding	3	167735243	167825568	1
ENSG00000182809	0.624783	8.58e-05	0.000471874	CRIP2	protein_coding	14	105472962	105480170	1
ENSG00000279196	1.77851	8.67e-05	0.000476638	AC135048.4	TEC	16	30984630	30988270	-1
ENSG00000227038	1.05638	8.78e-05	0.000481901	GTF2IP7	transcribed_unprocessed_pseudogene	7	76090431	76108779	-1
ENSG00000283511	1.66054	8.79e-05	0.000482205	AC137936.2	transcribed_unitary_pseudogene	3	58180009	58187495	1
ENSG00000229809	0.64358	8.82e-05	0.000483587	ZNF688	protein_coding	16	30569346	30572734	-1
ENSG00000166922	1.04783	8.98e-05	0.000491441	SCG5	protein_coding	15	32641676	32697098	1
ENSG00000213290	1.98826	9.13e-05	0.000498144	PGK1P2	processed_pseudogene	19	12559571	12561105	1
ENSG00000137273	0.600588	9.14e-05	0.000498501	FOXF2	protein_coding	6	1389576	1395603	1
ENSG00000154134	0.598973	9.24e-05	0.000503296	ROBO3	protein_coding	11	124865386	124881470	1
ENSG00000164976	0.594628	9.24e-05	0.000503296	MYORG	protein_coding	9	34366670	34376853	-1
ENSG00000176658	1.02676	9.32e-05	0.000507079	MYO1D	protein_coding	17	32492522	32877177	-1
ENSG00000267577	1.70501	9.46e-05	0.000513634	AC010327.3	antisense	19	55158939	55177540	1
ENSG00000067715	0.823506	9.55e-05	0.000517634	SYT1	protein_coding	12	78863993	79452008	1
ENSG00000224536	0.928684	0.000102457	0.000551615	AC096677.1	antisense	1	201507241	201534784	1
ENSG00000173040	0.763568	0.000102428	0.000551615	EVC2	protein_coding	4	5542772	5709548	-1
ENSG00000272068	0.660653	0.000103493	0.000556858	AL365181.2	lincRNA	1	156637783	156641004	-1
ENSG00000172159	0.915224	0.000106152	0.000570123	FRMD3	protein_coding	9	83242990	83538546	-1
ENSG00000166321	0.645165	0.000107052	0.000574435	NUDT13	protein_coding	10	73110375	73131828	1
ENSG00000105549	2.63195	0.000108902	0.000583305	THEG	protein_coding	19	361747	376670	-1
ENSG00000261040	1.3024	0.000112251	0.000599789	WFDC21P	transcribed_unitary_pseudogene	17	60083566	60091885	-1
ENSG00000272114	2.06375	0.000112679	0.000601533	AL136131.3	antisense	6	43770429	43770616	-1
ENSG00000111981	0.850776	0.000113234	0.000604131	ULBP1	protein_coding	6	149964007	149973710	1
ENSG00000118922	0.82606	0.000113857	0.000606004	KLF12	protein_coding	13	73686089	73995056	-1
ENSG00000132821	1.35115	0.000115056	0.000610909	VSTM2L	protein_coding	20	37903104	37945350	1
ENSG00000047457	1.04362	0.000116047	0.000615429	CP	protein_coding	3	149162410	149222055	-1
ENSG00000242732	0.609662	0.000120466	0.000636577	RTL5	protein_coding	X	72127110	72131901	-1
ENSG00000204815	1.21737	0.000122146	0.000644686	TTC25	protein_coding	17	41930635	41965651	1
ENSG00000260630	0.658597	0.000128823	0.000677103	SNAI3-AS1	antisense	16	88663298	88687186	1
ENSG00000129946	1.39159	0.000131869	0.000690046	SHC2	protein_coding	19	416583	460996	-1
ENSG00000197587	1.09105	0.000134862	0.000703003	DMBX1	protein_coding	1	46506996	46514226	1
ENSG00000143554	0.834952	0.000136277	0.00070934	SLC27A3	protein_coding	1	153774354	153780157	1
ENSG00000111266	0.614825	0.000149425	0.00077053	DUSP16	protein_coding	12	12474210	12562383	-1
ENSG00000135063	1.11097	0.000150161	0.000774096	FAM189A2	protein_coding	9	69324567	69392558	1
ENSG00000106733	0.875343	0.000150702	0.000776436	NMRK1	protein_coding	9	75060573	75088217	-1
ENSG00000213949	0.711897	0.000153451	0.000788076	ITGA1	protein_coding	5	52787896	52959210	1
ENSG00000105613	0.654943	0.000153557	0.000788393	MAST1	protein_coding	19	12833951	12874951	1
ENSG00000279455	2.73857	0.000153641	0.000788598	AC117500.5	TEC	12	131620178	131620765	-1
ENSG00000104368	0.850013	0.000154261	0.000791549	PLAT	protein_coding	8	42175233	42207724	-1
ENSG00000187105	1.93317	0.000154816	0.000793478	HEATR4	protein_coding	14	73478484	73558947	-1
ENSG00000204362	0.846387	0.000157783	0.000806393	AL590644.1	lincRNA	1	17189783	17197617	1
ENSG00000162733	1.31047	0.000158562	0.000809867	DDR2	protein_coding	1	162631373	162787400	1
ENSG00000203497	0.767666	0.000165514	0.000841246	PDCD4-AS1	antisense	10	110869868	110872233	-1
ENSG00000161270	1.51106	0.000168617	0.000855303	NPHS1	protein_coding	19	35825964	35869287	-1
ENSG00000106327	0.790776	0.000170235	0.000862277	TFR2	protein_coding	7	100620416	100642779	-1
ENSG00000079931	0.685754	0.000181622	0.000913163	MOXD1	protein_coding	6	132296055	132401545	-1
ENSG00000272808	1.21966	0.000186543	0.000934196	AC015712.6	processed_transcript	15	100849831	100876836	1
ENSG00000244128	0.705172	0.000186486	0.000934196	LINC01322	lincRNA	3	165206960	165655423	1
ENSG00000228328	1.58231	0.000188111	0.000940982	AL158201.1	processed_pseudogene	X	68070520	68071767	-1
ENSG00000182218	0.796963	0.000188716	0.000942943	HHIPL1	protein_coding	14	99645110	99680569	1
ENSG00000124466	0.851391	0.00020077	0.000996705	LYPD3	protein_coding	19	43460787	43465660	-1
ENSG00000265190	0.60468	0.00020254	0.00100436	ANXA8	protein_coding	10	47460162	47484158	-1
ENSG00000143387	0.900728	0.000205124	0.00101462	CTSK	protein_coding	1	150796208	150808323	-1
ENSG00000115266	0.65509	0.000213106	0.00105117	APC2	protein_coding	19	1446302	1473244	1
ENSG00000198223	0.843353	0.000221263	0.00108687	CSF2RA	protein_coding	X	1268800	1310381	1
ENSG00000250412	2.21182	0.000223185	0.00109479	KLHL2P1	unprocessed_pseudogene	4	119334329	119378233	1
ENSG00000144476	0.897281	0.000225733	0.00110514	ACKR3	protein_coding	2	236567787	236582358	1
ENSG00000235423	0.622334	0.000233393	0.00113855	AC068768.1	antisense	12	123252030	123261483	-1
ENSG00000246228	0.766446	0.000237191	0.00115645	CASC8	antisense	8	127289817	127482139	-1
ENSG00000214145	1.95893	0.000239498	0.00116577	LINC00887	lincRNA	3	194296465	194312803	-1
ENSG00000007264	2.4011	0.00024135	0.00117446	MATK	protein_coding	19	3777970	3802129	-1
ENSG00000117115	1.44863	0.000243644	0.00118399	PADI2	protein_coding	1	17066761	17119435	-1
ENSG00000256151	0.760472	0.000246901	0.00119884	ADGRD1-AS1	lincRNA	12	130990138	130993976	-1
ENSG00000274512	0.605765	0.000248983	0.00120729	TBC1D3L	protein_coding	17	37977972	37989048	-1
ENSG00000259953	0.697705	0.000253621	0.00122777	AL138756.1	sense_overlapping	9	112032555	112037730	-1
ENSG00000076344	0.819166	0.000257566	0.00124448	RGS11	protein_coding	16	268301	275980	-1
ENSG00000198443	1.04975	0.000261601	0.00126019	KRTAP4-1	protein_coding	17	41184102	41185342	-1
ENSG00000141448	1.09892	0.000265894	0.00127948	GATA6	protein_coding	18	22169443	22202528	1
ENSG00000159713	1.4789	0.000272767	0.00130936	TPPP3	protein_coding	16	67389809	67393535	-1
ENSG00000269386	0.870072	0.000274438	0.00131666	RAB11B-AS1	antisense	19	8374373	8390685	-1
ENSG00000270607	1.42952	0.000277427	0.0013292	AC009549.1	lincRNA	11	19710934	19712619	-1
ENSG00000257642	2.51097	0.000279607	0.00133712	KCCAT198	antisense	12	105304867	105327017	-1
ENSG00000150281	1.14688	0.000297523	0.00141363	CTF1	protein_coding	16	30896607	30903560	1
ENSG00000099251	0.841565	0.000303586	0.00144012	HSD17B7P2	transcribed_unprocessed_pseudogene	10	38356380	38378505	1
ENSG00000179528	0.746478	0.000332778	0.00156107	LBX2	protein_coding	2	74497517	74503316	-1
ENSG00000275131	0.854097	0.000338536	0.00158637	AC241952.1	transcribed_unprocessed_pseudogene	1	120489860	120701289	-1
ENSG00000143786	0.719836	0.000344061	0.00160907	CNIH3	protein_coding	1	224434660	224740549	1
ENSG00000231770	0.83235	0.000346103	0.00161754	TMEM44-AS1	antisense	3	194584011	194590260	1
ENSG00000282885	1.5953	0.000346728	0.0016194	AL627171.2	lincRNA	14	49861176	49864326	-1
ENSG00000152784	0.694747	0.000347072	0.00162037	PRDM8	protein_coding	4	80183879	80204329	1
ENSG00000185046	0.969592	0.000360358	0.00167797	ANKS1B	protein_coding	12	98726457	99984654	-1
ENSG00000128590	1.02367	0.000374568	0.00173684	DNAJB9	protein_coding	7	108569568	108574850	1
ENSG00000181652	1.79732	0.000377645	0.00174882	ATG9B	protein_coding	7	151012209	151024499	-1
ENSG00000226415	0.684447	0.000379167	0.00175541	TPI1P1	processed_pseudogene	1	76699789	76700538	1
ENSG00000107954	1.37723	0.000379739	0.0017576	NEURL1	protein_coding	10	103493979	103592552	1
ENSG00000250271	0.837725	0.00038646	0.00178404	AC068647.2	transcribed_unprocessed_pseudogene	3	151797047	151808249	1
ENSG00000205085	1.55603	0.000391512	0.00180642	FAM71F2	protein_coding	7	128672288	128687872	1
ENSG00000203635	2.01043	0.00040472	0.00186106	AC144450.1	lincRNA	2	1620510	1625419	-1
ENSG00000256006	1.31174	0.00040562	0.00186423	AC084117.1	sense_intronic	11	18405609	18406731	1
ENSG00000137393	0.619874	0.000406372	0.00186672	RNF144B	protein_coding	6	18387350	18468874	1
ENSG00000261189	0.987576	0.000433486	0.00197946	AL031058.1	antisense	6	7540451	7541338	-1
ENSG00000101096	0.90874	0.000436008	0.00198944	NFATC2	protein_coding	20	51386957	51562831	-1
ENSG00000116962	0.848918	0.000441684	0.00201223	NID1	protein_coding	1	235975830	236065162	-1
ENSG00000267424	2.54133	0.000451908	0.00205511	AC020934.1	antisense	19	12825711	12832983	1
ENSG00000130545	0.88107	0.000463395	0.00210518	CRB3	protein_coding	19	6463777	6467221	1
ENSG00000245904	1.66439	0.000467026	0.0021195	AC025164.1	antisense	12	92145573	92189660	1
ENSG00000180767	0.81135	0.00046873	0.00212614	CHST13	protein_coding	3	126524283	126543291	1
ENSG00000105499	1.17561	0.000471806	0.00213846	PLA2G4C	protein_coding	19	48047843	48110817	-1
ENSG00000167654	3.92546	0.000474267	0.00214797	ATCAY	protein_coding	19	3879864	3928079	1
ENSG00000168453	0.66279	0.000476186	0.00215339	HR	protein_coding	8	22114415	22133384	-1
ENSG00000155093	1.42013	0.000491655	0.00221201	PTPRN2	protein_coding	7	157539056	158587788	-1
ENSG00000204792	1.45381	0.000499895	0.00224339	LINC01291	lincRNA	2	74918148	74938418	1
ENSG00000018869	0.780479	0.000501588	0.00225041	ZNF582	protein_coding	19	56375846	56393545	-1
ENSG00000223764	0.733012	0.000502806	0.00225461	LINC02593	lincRNA	1	916865	921016	-1
ENSG00000197863	0.699438	0.000505395	0.0022652	ZNF790	protein_coding	19	36817428	36850787	-1
ENSG00000244041	0.816599	0.000506025	0.00226745	LINC01011	lincRNA	6	2987967	2991173	1
ENSG00000171747	2.00862	0.000511924	0.00229214	LGALS4	protein_coding	19	38801671	38813364	-1
ENSG00000127863	1.27964	0.000512501	0.00229415	TNFRSF19	protein_coding	13	23570370	23676104	1
ENSG00000174672	0.644871	0.000515554	0.00230665	BRSK2	protein_coding	11	1389899	1462689	1
ENSG00000236064	2.37799	0.000528438	0.00235952	AL034399.2	antisense	X	107894597	107935980	-1
ENSG00000153790	0.929359	0.000544227	0.00242696	C7orf31	protein_coding	7	25134697	25180356	-1
ENSG00000152463	2.70526	0.000556106	0.00247433	OLAH	protein_coding	10	15032227	15073852	1
ENSG00000137825	0.736113	0.000564834	0.00251127	ITPKA	protein_coding	15	41493393	41503551	1
ENSG00000149506	2.06705	0.000570002	0.00253234	ZP1	protein_coding	11	60867562	60875693	1
ENSG00000223403	1.08343	0.000575325	0.00255407	MEG9	lincRNA	14	101064151	101072937	1
ENSG00000136367	0.809858	0.000610791	0.00269128	ZFHX2	protein_coding	14	23520855	23556192	-1
ENSG00000223745	0.589183	0.00061416	0.00270343	CCDC18-AS1	processed_transcript	1	93262186	93346025	-1
ENSG00000136999	0.678544	0.000618608	0.00271828	NOV	protein_coding	8	119416306	119424353	1
ENSG00000168939	1.0006	0.000639382	0.00279915	SPRY3	protein_coding	X	155767812	155782459	1
ENSG00000186076	0.754296	0.000652146	0.00284308	AC012085.1	processed_pseudogene	12	93640822	93641586	-1
ENSG00000260428	0.815075	0.000671341	0.00291959	SCX	protein_coding	8	144266560	144268481	1
ENSG00000175147	0.610949	0.000680682	0.00295585	TMEM51-AS1	antisense	1	15111815	15153237	-1
ENSG00000222009	0.585243	0.000701677	0.0030366	BTBD19	protein_coding	1	44808482	44815585	1
ENSG00000272502	1.7873	0.000701881	0.00303674	AC104958.2	antisense	8	120812219	120813359	1
ENSG00000233818	1.48253	0.000704928	0.00304669	AP000695.2	antisense	21	36445731	36532408	1
ENSG00000178752	0.848448	0.000712107	0.00307348	ERFE	protein_coding	2	238158982	238168900	1
ENSG00000272750	1.28391	0.000732549	0.00315249	AL592148.3	antisense	1	222658867	222661512	-1
ENSG00000169231	0.598855	0.000736091	0.00316542	THBS3	protein_coding	1	155195588	155209051	-1
ENSG00000153814	0.690505	0.000761423	0.00326406	JAZF1	protein_coding	7	27830573	28180743	-1
ENSG00000103888	1.63958	0.000764694	0.00327729	CEMIP	protein_coding	15	80779343	80951776	1
ENSG00000165929	0.964871	0.000777464	0.00332638	TC2N	protein_coding	14	91779751	91867536	-1
ENSG00000149243	0.91523	0.000795275	0.00339112	KLHL35	protein_coding	11	75422394	75430629	-1
ENSG00000255398	4.01787	0.000826793	0.00351194	HCAR3	protein_coding	12	122714756	122716892	-1
ENSG00000176383	0.949182	0.000826996	0.00351194	B3GNT4	protein_coding	12	122203543	122208952	1
ENSG00000179913	1.03048	0.000829258	0.00351992	B3GNT3	protein_coding	19	17794828	17813082	1
ENSG00000183044	1.35349	0.00083443	0.00354018	ABAT	protein_coding	16	8674565	8784575	1
ENSG00000258376	0.700701	0.000846806	0.00358925	AC004846.1	antisense	14	73242651	73245979	-1
ENSG00000126562	0.747985	0.00084847	0.00359544	WNK4	protein_coding	17	42780678	42796936	1
ENSG00000130700	0.780947	0.000857872	0.00363007	GATA5	protein_coding	20	62463497	62475970	-1
ENSG00000111012	0.582895	0.000863595	0.00365071	CYP27B1	protein_coding	12	57762334	57768986	-1
ENSG00000058085	0.71053	0.000874405	0.00369297	LAMC2	protein_coding	1	183186238	183244900	1
ENSG00000134363	0.606581	0.000881673	0.00371923	FST	protein_coding	5	53480409	53487134	1
ENSG00000256258	2.38238	0.000902325	0.00379191	AC117500.3	lincRNA	12	131621891	131623203	-1
ENSG00000260077	0.734734	0.000908991	0.00381539	AC104794.2	lincRNA	2	10039092	10040663	-1
ENSG00000183248	0.752343	0.000933064	0.00390533	PRR36	protein_coding	19	7868719	7874379	-1
ENSG00000163701	0.769722	0.000941936	0.00393781	IL17RE	protein_coding	3	9902612	9916402	1
ENSG00000185015	1.04405	0.00095798	0.00399357	CA13	protein_coding	8	85220587	85284073	1
ENSG00000178977	1.92465	0.000960684	0.00400296	LINC00324	lincRNA	17	8220642	8224043	-1
ENSG00000181690	0.599272	0.000964196	0.00401476	PLAG1	protein_coding	8	56160904	56211324	-1
ENSG00000012171	0.837698	0.000983213	0.00408339	SEMA3B	protein_coding	3	50267558	50277546	1
ENSG00000254554	1.16701	0.000984267	0.00408489	AC080023.1	antisense	11	10302657	10303704	-1
ENSG00000160801	1.87773	0.00101442	0.00419822	PTH1R	protein_coding	3	46877746	46903799	1
ENSG00000099840	1.02617	0.00102817	0.00424818	IZUMO4	protein_coding	19	2096429	2099593	1
ENSG00000272419	0.821832	0.00103315	0.00426477	LINC01145	transcribed_unprocessed_pseudogene	1	145164099	145216058	-1
ENSG00000116574	0.796844	0.00105203	0.00433401	RHOU	protein_coding	1	228735077	228746669	1
ENSG00000107518	1.00248	0.00107068	0.00439946	ATRNL1	protein_coding	10	115093365	115948992	1
ENSG00000112812	0.712313	0.00108704	0.00445623	PRSS16	protein_coding	6	27247701	27256624	1
ENSG00000156959	0.963201	0.001101	0.00450859	LHFPL4	protein_coding	3	9498361	9553802	-1
ENSG00000146859	0.868466	0.00113187	0.00461953	TMEM140	protein_coding	7	135148072	135166215	1
ENSG00000128482	0.9399	0.00114071	0.00465073	RNF112	protein_coding	17	19411125	19417276	1
ENSG00000269970	2.78893	0.00114196	0.00465429	AL162424.1	sense_intronic	9	122372605	122372825	1
ENSG00000162645	1.21668	0.00114281	0.00465666	GBP2	protein_coding	1	89106132	89150456	-1
ENSG00000164932	0.825715	0.00114985	0.00468431	CTHRC1	protein_coding	8	103371515	103382997	1
ENSG00000174951	1.46031	0.00117464	0.00477429	FUT1	protein_coding	19	48748011	48755390	-1
ENSG00000164850	1.82249	0.0011924	0.0048343	GPER1	protein_coding	7	1082208	1093815	1
ENSG00000088899	0.586722	0.00119555	0.0048433	LZTS3	protein_coding	20	3162617	3173592	-1
ENSG00000105538	1.29011	0.00124808	0.00503353	RASIP1	protein_coding	19	48720587	48740721	-1
ENSG00000237975	1.05275	0.00124941	0.00503571	FLG-AS1	antisense	1	152168125	152445456	1
ENSG00000145949	1.16692	0.00128957	0.00518317	MYLK4	protein_coding	6	2663629	2750966	-1
ENSG00000134668	0.635559	0.00130337	0.00523505	SPOCD1	protein_coding	1	31790422	31816051	-1
ENSG00000265666	0.84698	0.00132231	0.00530271	RARA-AS1	antisense	17	40340867	40343136	-1
ENSG00000245025	0.823692	0.00135864	0.00543364	AC107959.1	antisense	8	22984596	23019335	-1
ENSG00000251281	1.03034	0.00136288	0.00544567	AC034223.2	lincRNA	5	33011322	33017607	-1
ENSG00000196267	0.935183	0.0013734	0.00548401	ZNF836	protein_coding	19	52153864	52171643	-1
ENSG00000238045	0.62407	0.00139568	0.00556542	AC009133.1	antisense	16	29808636	29821252	-1
ENSG00000274630	1.29506	0.00141151	0.00561594	AC125257.2	antisense	17	41867581	41867736	1
ENSG00000283930	1.31813	0.0014387	0.00571769	AL117339.5	protein_coding	10	38094368	38360098	1
ENSG00000229782	3.11976	0.00146737	0.00581856	AC118754.1	antisense	17	4497394	4499674	-1
ENSG00000144802	0.581217	0.00147742	0.00585317	NFKBIZ	protein_coding	3	101827991	101861022	1
ENSG00000197558	1.00818	0.00152065	0.00600296	SSPO	protein_coding	7	149776042	149833979	1
ENSG00000228203	0.784789	0.00153117	0.00604046	RNF144A-AS1	processed_transcript	2	6912277	6918709	-1
ENSG00000135604	1.10301	0.00154764	0.00608914	STX11	protein_coding	6	144150526	144188370	1
ENSG00000197646	0.794968	0.00156598	0.00614899	PDCD1LG2	protein_coding	9	5510570	5571254	1
ENSG00000176593	0.668252	0.00161244	0.00630351	AC008969.1	processed_transcript	19	58002061	58011232	1
ENSG00000172006	0.904799	0.001653	0.00643508	ZNF554	protein_coding	19	2819874	2835773	1
ENSG00000176222	0.811477	0.0016784	0.00651731	ZNF404	protein_coding	19	43872363	43901385	-1
ENSG00000188505	1.1873	0.00168207	0.00652528	NCCRP1	protein_coding	19	39196961	39201884	1
ENSG00000149582	0.992609	0.00168859	0.00654628	TMEM25	protein_coding	11	118531041	118547280	1
ENSG00000228232	0.595959	0.0017188	0.00665177	GAPDHP1	processed_pseudogene	X	39787132	39788136	-1
ENSG00000204219	0.604274	0.00173592	0.00670922	TCEA3	protein_coding	1	23381061	23424740	-1
ENSG00000125510	0.861858	0.00175349	0.00677072	OPRL1	protein_coding	20	64080173	64100643	1
ENSG00000180787	0.634161	0.00176808	0.0068201	ZFP3	protein_coding	17	5078248	5096374	1
ENSG00000189223	0.692929	0.00181687	0.00698704	PAX8-AS1	processed_transcript	2	113211522	113276581	1
ENSG00000247809	1.63395	0.00184686	0.00708851	NR2F2-AS1	antisense	15	96110040	96327361	-1
ENSG00000077264	0.826022	0.00185514	0.00711102	PAK3	protein_coding	X	110944285	111227361	1
ENSG00000204947	0.730005	0.00190968	0.00729956	ZNF425	protein_coding	7	149102784	149126346	-1
ENSG00000166257	1.68748	0.00194708	0.00741533	SCN3B	protein_coding	11	123629187	123655244	-1
ENSG00000092929	0.658467	0.00195205	0.00743105	UNC13D	protein_coding	17	75827225	75844717	-1
ENSG00000089820	0.928485	0.00199939	0.00759819	ARHGAP4	protein_coding	X	153907367	153934999	-1
ENSG00000185291	2.29011	0.00200837	0.00763069	IL3RA	protein_coding	X	1336616	1382689	1
ENSG00000107742	1.03915	0.00201823	0.00765828	SPOCK2	protein_coding	10	72059035	72089032	-1
ENSG00000100027	0.869873	0.00206682	0.00782255	YPEL1	protein_coding	22	21697544	21735834	-1
ENSG00000007516	0.769322	0.00208134	0.00787077	BAIAP3	protein_coding	16	1333601	1349441	1
ENSG00000258334	2.13535	0.00209444	0.00790988	AC125611.4	antisense	12	49292631	49324576	-1
ENSG00000129675	0.943814	0.0020948	0.00790988	ARHGEF6	protein_coding	X	136665547	136782088	-1
ENSG00000140368	2.57089	0.0021339	0.00804209	PSTPIP1	protein_coding	15	76993359	77037332	1
ENSG00000131737	1.22397	0.00215085	0.00809823	KRT34	protein_coding	17	41377650	41382403	-1
ENSG00000235863	0.852092	0.00216915	0.00815412	B3GALT4	protein_coding	6	33277132	33284832	1
ENSG00000220804	0.638526	0.00217566	0.00817511	LINC01881	transcribed_unprocessed_pseudogene	2	242088633	242160153	1
ENSG00000205795	0.829098	0.00225925	0.00844266	CYS1	protein_coding	2	10056780	10080944	-1
ENSG00000110031	0.597232	0.00230552	0.00859198	LPXN	protein_coding	11	58526871	58578220	-1
ENSG00000148600	1.11574	0.0023206	0.00864091	CDHR1	protein_coding	10	84194635	84219621	1
ENSG00000136244	0.903903	0.00233768	0.00869173	IL6	protein_coding	7	22725884	22732002	1
ENSG00000102984	0.587484	0.00235873	0.00876262	ZNF821	protein_coding	16	71859680	71895336	-1
ENSG00000203499	0.988359	0.00235972	0.00876448	IQANK1	protein_coding	8	143734140	143790644	1
ENSG00000119411	1.42456	0.00236762	0.00879197	BSPRY	protein_coding	9	113349541	113371233	1
ENSG00000188112	1.06088	0.00236949	0.00879707	C6orf132	protein_coding	6	42101118	42142619	-1
ENSG00000266993	1.55921	0.00237601	0.00881203	AL050343.1	antisense	1	51793934	51799154	1
ENSG00000114279	0.607546	0.00238409	0.00883459	FGF12	protein_coding	3	192139395	192767764	-1
ENSG00000100593	1.50202	0.00242015	0.0089495	ISM2	protein_coding	14	77474394	77498850	-1
ENSG00000214274	0.641523	0.00245629	0.009068	ANG	protein_coding	14	20684177	20698971	1
ENSG00000137877	0.999319	0.00250636	0.00923554	SPTBN5	protein_coding	15	41848144	41894077	-1
ENSG00000130487	2.01395	0.00253013	0.00930957	KLHDC7B	protein_coding	22	50545891	50551023	1
ENSG00000280407	1.08502	0.00254805	0.00937161	AC132872.4	TEC	17	82249067	82251844	1
ENSG00000100290	1.764	0.00258628	0.00949644	BIK	protein_coding	22	43110748	43129712	1
ENSG00000106772	1.9183	0.00259056	0.00950425	PRUNE2	protein_coding	9	76611376	76906087	-1
ENSG00000284738	1.05424	0.00261846	0.00960066	AL358472.5	antisense	1	153923337	153935240	1
ENSG00000183570	0.937929	0.00265351	0.00970909	PCBP3	protein_coding	21	45643694	45942454	1
ENSG00000069188	0.980863	0.00269971	0.00984353	SDK2	protein_coding	17	73334384	73644089	-1
ENSG00000226674	1.15291	0.00270094	0.00984601	TEX41	lincRNA	2	144667967	145262988	1
ENSG00000197599	0.953604	0.0027886	0.0101322	CCDC154	protein_coding	16	1434383	1444556	-1
ENSG00000158315	0.632697	0.00280269	0.0101788	RHBDL2	protein_coding	1	38885807	38941799	-1
ENSG00000260196	0.662723	0.00285457	0.0103422	AC124798.1	antisense	11	17380649	17383531	1
ENSG00000170745	0.822057	0.00286228	0.010368	KCNS3	protein_coding	2	17877847	18361616	1
ENSG00000240303	0.589106	0.00287673	0.0104097	ACAD11	protein_coding	3	132558138	132660723	-1
ENSG00000270681	2.40349	0.0028988	0.010481	AC095055.1	antisense	4	151139991	151141103	1
ENSG00000232453	1.23626	0.00290238	0.0104918	AC105277.1	lincRNA	1	58882868	58903747	-1
ENSG00000265962	0.791683	0.00300233	0.0108134	GACAT2	antisense	18	8695856	8707621	-1
ENSG00000184451	0.870393	0.00305533	0.0109775	CCR10	protein_coding	17	42678889	42683917	-1
ENSG00000004139	0.676763	0.00305898	0.0109884	SARM1	protein_coding	17	28364356	28404049	1
ENSG00000274020	0.701944	0.00313441	0.0112275	LINC01138	processed_transcript	1	148290889	148519604	-1
ENSG00000178026	0.633808	0.00320136	0.0114234	LRRC75B	protein_coding	22	24585620	24593208	-1
ENSG00000111199	0.777297	0.00321113	0.0114513	TRPV4	protein_coding	12	109783085	109833401	-1
ENSG00000185467	1.4414	0.00324935	0.0115713	KPNA7	protein_coding	7	99173574	99207506	-1
ENSG00000240875	0.671776	0.00327043	0.0116347	LINC00886	lincRNA	3	156747346	156817062	-1
ENSG00000167555	1.38601	0.0033409	0.0118568	ZNF528	protein_coding	19	52397849	52418412	1
ENSG00000197847	1.04825	0.00343619	0.0121584	SLC22A20P	transcribed_unitary_pseudogene	11	65213840	65242757	1
ENSG00000181577	1.065	0.00348017	0.0123018	C6orf223	protein_coding	6	44000580	44005958	1
ENSG00000253837	1.25534	0.00353141	0.012463	AC090197.1	processed_transcript	8	23336171	23366125	1
ENSG00000130822	1.97501	0.00356974	0.0125776	PNCK	protein_coding	X	153669730	153689010	-1
ENSG00000175874	0.646536	0.00359895	0.012661	CREG2	protein_coding	2	101345551	101387595	-1
ENSG00000162745	0.84235	0.00363995	0.0127875	OLFML2B	protein_coding	1	161983192	162023854	-1
ENSG00000272512	0.858648	0.00368186	0.0129108	AL645608.7	lincRNA	1	995966	998051	-1
ENSG00000132801	0.640525	0.00369151	0.0129354	ZSWIM3	protein_coding	20	45857617	45879122	1
ENSG00000104888	0.848685	0.00372627	0.0130313	SLC17A7	protein_coding	19	49429401	49442360	-1
ENSG00000159860	2.70443	0.00373491	0.0130589	TCAF2P1	transcribed_unprocessed_pseudogene	7	143800732	143817973	1
ENSG00000261101	2.0789	0.00376558	0.0131506	AC234775.3	sense_overlapping	X	101627868	101628523	1
ENSG00000278869	1.05371	0.00380989	0.0132791	BX539320.1	lincRNA	22	49933198	49934074	-1
ENSG00000120051	0.834188	0.0038383	0.0133624	CFAP58	protein_coding	10	104353764	104455090	1
ENSG00000179059	1.25777	0.00387446	0.0134516	ZFP42	protein_coding	4	187995771	188005050	1
ENSG00000196440	0.720167	0.00389084	0.0134917	ARMCX4	protein_coding	X	101418287	101533459	1
ENSG00000214999	0.601588	0.00390573	0.0135333	AC129492.1	antisense	17	8079482	8081565	1
ENSG00000073756	1.03942	0.00404424	0.0139613	PTGS2	protein_coding	1	186671791	186680427	-1
ENSG00000272909	0.863128	0.0040632	0.014024	AL122035.2	antisense	14	64440369	64442238	-1
ENSG00000251615	0.917053	0.00406938	0.0140427	AC104825.1	lincRNA	4	8355090	8358338	-1
ENSG00000164619	0.876131	0.00420681	0.014469	BMPER	protein_coding	7	33904308	34156356	1
ENSG00000269113	1.33524	0.00431398	0.0147916	TRABD2B	protein_coding	1	47760528	47996895	-1
ENSG00000152779	1.45179	0.00435046	0.0148908	SLC16A12	protein_coding	10	89430299	89556641	-1
ENSG00000188760	0.686909	0.00436451	0.014928	TMEM198	protein_coding	2	219543663	219550595	1
ENSG00000273443	0.948106	0.00442171	0.0150996	AL645608.8	lincRNA	1	1062208	1063288	-1
ENSG00000247679	0.739755	0.00450564	0.0153566	AC139795.2	antisense	5	177611253	177619754	1
ENSG00000204584	0.589222	0.00452539	0.015421	FLJ45513	antisense	17	49845910	49848837	1
ENSG00000263874	1.02057	0.00452652	0.0154219	LINC00672	protein_coding	17	38925168	38929384	1
ENSG00000155961	0.744791	0.0045605	0.0155167	RAB39B	protein_coding	X	155258241	155264589	-1
ENSG00000267551	1.32654	0.00459775	0.0156214	AC005264.1	antisense	19	3141576	3155175	-1
ENSG00000078900	0.896686	0.00464283	0.0157575	TP73	protein_coding	1	3652520	3736201	1
ENSG00000231752	0.988607	0.00473143	0.0160183	EMBP1	transcribed_unprocessed_pseudogene	1	121519112	121575702	1
ENSG00000134538	1.19347	0.00474117	0.0160456	SLCO1B1	protein_coding	12	21131202	21239246	1
ENSG00000214922	0.969989	0.00474129	0.0160456	HLA-F-AS1	processed_transcript	6	29726601	29749049	-1
ENSG00000269954	2.22637	0.00479126	0.0161838	AC022239.1	antisense	8	11552488	11564694	-1
ENSG00000272221	0.844209	0.00480243	0.0162153	AL645933.2	lincRNA	6	31394289	31395495	-1
ENSG00000106823	0.931169	0.0048326	0.0163041	ECM2	protein_coding	9	92493554	92536655	-1
ENSG00000163328	0.615995	0.00486517	0.016399	GPR155	protein_coding	2	174431571	174487094	-1
ENSG00000188910	1.21098	0.00498116	0.0167453	GJB3	protein_coding	1	34781189	34786369	1
ENSG00000017483	1.43244	0.00501272	0.0168419	SLC38A5	protein_coding	X	48458537	48470256	-1
ENSG00000160145	0.625022	0.00502806	0.0168774	KALRN	protein_coding	3	124080023	124726325	1
ENSG00000219891	1.17626	0.00510575	0.0170896	ZSCAN12P1	transcribed_unprocessed_pseudogene	6	28091154	28093664	1
ENSG00000215244	1.74324	0.00515265	0.0172368	AL137145.2	lincRNA	10	6277687	6335982	1
ENSG00000237517	0.661633	0.00516095	0.0172574	DGCR5	transcribed_unprocessed_pseudogene	22	18970514	18994628	1
ENSG00000105699	0.629639	0.00532569	0.0177486	LSR	protein_coding	19	35248330	35267964	1
ENSG00000163817	1.26526	0.00537289	0.0178723	SLC6A20	protein_coding	3	45755450	45796535	-1
ENSG00000164690	0.769634	0.00537261	0.0178723	SHH	protein_coding	7	155799986	155812273	-1
ENSG00000215769	0.629568	0.00538485	0.0179055	ARHGAP27P1-BPTFP1-KPNA2P3	processed_transcript	17	64749663	64781707	-1
ENSG00000084628	0.897937	0.00552276	0.018285	NKAIN1	protein_coding	1	31179745	31239554	-1
ENSG00000280303	0.757452	0.00553548	0.0183203	ERICD	lincRNA	8	140636281	140638283	1
ENSG00000134709	0.742084	0.00562364	0.0185634	HOOK1	protein_coding	1	59814786	59876378	1
ENSG00000135378	0.736507	0.00574608	0.0189113	PRRG4	protein_coding	11	32829943	32858123	1
ENSG00000102057	0.62985	0.00574545	0.0189113	KCND1	protein_coding	X	48961378	48971569	-1
ENSG00000185269	1.00442	0.00579003	0.0190276	NOTUM	protein_coding	17	81952507	81961840	-1
ENSG00000242861	1.01571	0.00580071	0.0190592	AL591895.1	antisense	1	225840883	225846522	-1
ENSG00000095713	2.4598	0.0058415	0.0191683	CRTAC1	protein_coding	10	97865000	98030828	-1
ENSG00000234264	1.18863	0.00587357	0.0192628	DEPDC1-AS1	antisense	1	68496676	68538627	1
ENSG00000273226	1.03203	0.0059084	0.0193699	AL391834.2	antisense	9	19375451	19375996	1
ENSG00000135439	0.700754	0.00592465	0.0194017	AGAP2	protein_coding	12	57723761	57742157	-1
ENSG00000250509	0.978695	0.00603176	0.0196977	AC034213.1	lincRNA	5	180441559	180443238	1
ENSG00000135406	1.21743	0.00607602	0.0198277	PRPH	protein_coding	12	49293252	49298686	1
ENSG00000234869	0.929346	0.0061751	0.0200992	AL021392.1	antisense	22	46541495	46548196	1
ENSG00000010379	1.12131	0.00622949	0.0202538	SLC6A13	protein_coding	12	220621	262873	-1
ENSG00000153012	0.915318	0.00623621	0.020272	LGI2	protein_coding	4	24998847	25030879	-1
ENSG00000236480	0.675104	0.00637351	0.0206803	PKMP1	processed_pseudogene	1	114535995	114537840	1
ENSG00000237624	0.619029	0.00637259	0.0206803	OXCT2P1	unprocessed_pseudogene	1	39514956	39516490	1
ENSG00000265817	1.27621	0.00643665	0.020847	FSBP	protein_coding	8	94372170	94436952	-1
ENSG00000240038	0.731071	0.0065959	0.0213005	AMY2B	protein_coding	1	103553815	103579534	1
ENSG00000250320	0.876682	0.00660657	0.0213272	AC113383.1	antisense	5	84384427	84490765	1
ENSG00000169884	0.7448	0.00660659	0.0213272	WNT10B	protein_coding	12	48965340	48971763	-1
ENSG00000153714	0.647632	0.00669631	0.0215854	LURAP1L	protein_coding	9	12775021	12822131	1
ENSG00000064300	1.2999	0.00691464	0.0222285	NGFR	protein_coding	17	49495293	49515017	1
ENSG00000137672	1.10145	0.00691998	0.0222416	TRPC6	protein_coding	11	101451564	101872562	-1
ENSG00000234043	1.11915	0.00704844	0.0225988	NUDT9P1	processed_pseudogene	10	91152605	91153349	-1
ENSG00000264215	0.91286	0.00705726	0.0226172	AC126365.1	lincRNA	17	20788071	20789584	1
ENSG00000156265	0.604051	0.00725412	0.0231685	MAP3K7CL	protein_coding	21	29077471	29175889	1
ENSG00000070669	0.589513	0.00731753	0.0233541	ASNS	protein_coding	7	97852118	97872542	-1
ENSG00000240219	1.34998	0.0073707	0.0234943	AL512306.2	lincRNA	1	204626775	204629712	1
ENSG00000238290	1.3253	0.00742325	0.0236234	AL034417.2	lincRNA	1	8026738	8122702	1
ENSG00000134769	1.35208	0.00747749	0.0237751	DTNA	protein_coding	18	34493290	34891844	1
ENSG00000261338	0.582274	0.00753634	0.0239232	AC021016.2	sense_overlapping	2	218255319	218257366	1
ENSG00000173175	1.04689	0.00754978	0.0239615	ADCY5	protein_coding	3	123282296	123449758	-1
ENSG00000106541	0.681281	0.00764332	0.024228	AGR2	protein_coding	7	16791811	16833433	-1
ENSG00000137265	0.838911	0.00786048	0.0248364	IRF4	protein_coding	6	391739	411447	1
ENSG00000215022	0.691892	0.00788773	0.0249048	AL008729.1	antisense	6	13264861	13295586	-1
ENSG00000183023	0.792613	0.00794312	0.0250617	SLC8A1	protein_coding	2	40097270	40611053	-1
ENSG00000173991	0.66636	0.00796558	0.0251147	TCAP	protein_coding	17	39664187	39666555	1
ENSG00000130287	1.27414	0.00800956	0.0252399	NCAN	protein_coding	19	19211973	19252233	1
ENSG00000240541	0.860906	0.00802347	0.0252747	TM4SF1-AS1	antisense	3	149377778	149386583	1
ENSG00000212864	0.606345	0.00803984	0.0253145	RNF208	protein_coding	9	137220247	137221581	-1
ENSG00000152926	0.713013	0.0080914	0.025457	ZNF117	protein_coding	7	64971776	65006684	-1
ENSG00000172382	1.0134	0.00813103	0.025559	PRSS27	protein_coding	16	2712418	2720551	-1
ENSG00000227946	0.623536	0.00835361	0.0261982	AC007383.2	lincRNA	2	206084605	206086564	1
ENSG00000171724	1.71886	0.0083811	0.0262705	VAT1L	protein_coding	16	77788530	77980107	1
ENSG00000015520	1.54689	0.00859993	0.0268377	NPC1L1	protein_coding	7	44512535	44541315	-1
ENSG00000273492	1.51212	0.00859793	0.0268377	AP000229.1	lincRNA	21	26170871	26217381	1
ENSG00000127399	0.80663	0.00872991	0.0272061	LRRC61	protein_coding	7	150322639	150338150	1
ENSG00000268220	0.941824	0.00873905	0.0272191	AC008040.5	antisense	3	170087810	170089590	1
ENSG00000175536	0.637631	0.00878455	0.0273223	LIPT2	protein_coding	11	74491712	74493733	-1
ENSG00000154678	0.956799	0.00886523	0.0275346	PDE1C	protein_coding	7	31751179	32299329	-1
ENSG00000170681	0.623186	0.00899098	0.0278665	CAVIN4	protein_coding	9	100578079	100587906	1
ENSG00000010810	0.650175	0.00906961	0.0280768	FYN	protein_coding	6	111660332	111873452	-1
ENSG00000125845	0.624536	0.00909109	0.0281325	BMP2	protein_coding	20	6767664	6780280	1
ENSG00000279118	0.893845	0.00948764	0.0291589	AC093535.2	TEC	5	126496279	126498604	1
ENSG00000250397	1.00112	0.00971186	0.0297675	AP006623.1	antisense	11	856880	859795	-1
ENSG00000254452	1.11654	0.00982149	0.0300671	AP001107.2	antisense	11	66276779	66277492	-1
ENSG00000081181	0.65389	0.00995765	0.0304261	ARG2	protein_coding	14	67619798	67651720	1
ENSG00000166750	0.787452	0.0101135	0.0308651	SLFN5	protein_coding	17	35243036	35273655	1
ENSG00000179846	1.04158	0.0102019	0.0310974	NKPD1	protein_coding	19	45149750	45158737	-1
ENSG00000068615	0.59459	0.0103895	0.031582	REEP1	protein_coding	2	86213993	86338083	-1
ENSG00000203392	0.836195	0.0105322	0.0319774	AC105020.1	antisense	15	75678548	75680752	1
ENSG00000204876	0.706609	0.0105462	0.0320036	AC021218.1	lincRNA	7	155962632	155966343	1
ENSG00000123201	0.643473	0.0105645	0.0320425	GUCY1B2	transcribed_unitary_pseudogene	13	50994511	51080862	-1
ENSG00000120693	0.979188	0.0105689	0.032045	SMAD9	protein_coding	13	36844831	36920765	-1
ENSG00000068976	0.902422	0.010873	0.0328141	PYGM	protein_coding	11	64746389	64760297	-1
ENSG00000186765	0.842407	0.0109052	0.0328956	FSCN2	protein_coding	17	81528396	81537130	1
ENSG00000196549	1.06533	0.0109676	0.0330785	MME	protein_coding	3	155024124	155183729	1
ENSG00000162461	0.86187	0.0110174	0.0332058	SLC25A34	protein_coding	1	15736405	15741396	1
ENSG00000224086	0.636038	0.011028	0.0332225	AC245452.1	antisense	22	21938293	21977632	1
ENSG00000226549	0.758257	0.0111757	0.03362	SCDP1	processed_pseudogene	17	20784645	20785725	1
ENSG00000163661	0.66813	0.011178	0.0336212	PTX3	protein_coding	3	157436789	157443628	1
ENSG00000072201	0.820248	0.0114345	0.0342939	LNX1	protein_coding	4	53459301	53701405	-1
ENSG00000186648	0.704574	0.0116291	0.0347775	CARMIL3	protein_coding	14	24052000	24069728	1
ENSG00000120278	0.776034	0.0116673	0.0348858	PLEKHG1	protein_coding	6	150599883	150843665	1
ENSG00000161082	0.840448	0.0119835	0.0356805	CELF5	protein_coding	19	3224703	3297076	1
ENSG00000267265	0.951128	0.0122481	0.0363644	AC011476.3	antisense	19	55006193	55048086	1
ENSG00000102409	0.610206	0.0122586	0.0363896	BEX4	protein_coding	X	103215092	103217246	1
ENSG00000226179	0.650078	0.0124935	0.0370128	LINC00685	antisense	X	320990	321851	1
ENSG00000270210	0.708616	0.0126782	0.0374844	AC104695.2	lincRNA	2	28425945	28426719	1
ENSG00000266341	0.885936	0.0126975	0.0375352	AC004477.2	antisense	17	48060383	48060669	-1
ENSG00000159212	0.774897	0.0127983	0.0377882	CLIC6	protein_coding	21	34669389	34718227	1
ENSG00000274904	0.773853	0.0128002	0.0377882	AC093512.1	antisense	16	30064306	30064825	-1
ENSG00000197776	0.683737	0.0128524	0.0379173	KLHDC1	protein_coding	14	49693105	49753152	1
ENSG00000131096	0.880819	0.0129205	0.0380926	PYY	protein_coding	17	43952738	44004469	-1
ENSG00000138135	0.888226	0.0130302	0.0383779	CH25H	protein_coding	10	89205629	89207314	-1
ENSG00000265263	0.686719	0.0131003	0.0385458	AC124066.1	antisense	17	19334308	19336127	-1
ENSG00000169403	0.743117	0.0132665	0.0389571	PTAFR	protein_coding	1	28147166	28193936	-1
ENSG00000183873	0.733878	0.0134433	0.0394306	SCN5A	protein_coding	3	38548057	38649673	-1
ENSG00000128710	0.670161	0.013501	0.039567	HOXD10	protein_coding	2	176108790	176119942	1
ENSG00000246640	0.602911	0.0135402	0.0396622	PICART1	lincRNA	17	50050349	50055739	-1
ENSG00000198576	0.760398	0.0135486	0.0396738	ARC	protein_coding	8	142611044	142614472	-1
ENSG00000198156	0.749534	0.0135517	0.0396762	NPIPB6	protein_coding	16	28342555	28363508	-1
ENSG00000157613	0.855267	0.0136232	0.0398525	CREB3L1	protein_coding	11	46277661	46321422	1
ENSG00000188396	0.693843	0.0136787	0.0399886	TCTEX1D4	protein_coding	1	44805913	44806675	-1
ENSG00000147437	0.675135	0.0137278	0.0401056	GNRH1	protein_coding	8	25419260	25424654	-1
ENSG00000074966	0.744469	0.0139482	0.0406623	TXK	protein_coding	4	48066393	48134256	-1
ENSG00000261490	0.64509	0.0147102	0.0426381	AC005674.2	sense_overlapping	4	10068089	10073019	-1
ENSG00000090339	0.74178	0.0150691	0.0434864	ICAM1	protein_coding	19	10270835	10286615	1
ENSG00000180535	0.725544	0.0150742	0.043494	BHLHA15	protein_coding	7	98211427	98212979	1
ENSG00000256894	0.675029	0.0151599	0.0437055	AC022509.3	antisense	12	26125155	26126617	-1
ENSG00000173557	0.623249	0.0153106	0.0440969	C2orf70	protein_coding	2	26562582	26579532	1
ENSG00000270882	0.645995	0.0154935	0.0445096	HIST2H4A	protein_coding	1	149832659	149839767	1
ENSG00000231465	0.754501	0.0155185	0.0445582	AL359636.2	antisense	9	122471358	122475817	1
ENSG00000128645	0.582627	0.0156152	0.0447634	HOXD1	protein_coding	2	176188579	176190907	1
ENSG00000184828	0.686647	0.0158114	0.0452451	ZBTB7C	protein_coding	18	48026673	48410752	-1
ENSG00000105559	0.681408	0.0158835	0.0454294	PLEKHA4	protein_coding	19	48837097	48868632	-1
ENSG00000142611	0.72183	0.0159281	0.045535	PRDM16	protein_coding	1	3069168	3438621	1
ENSG00000232022	0.710065	0.0161328	0.0460308	FAAHP1	transcribed_unprocessed_pseudogene	1	46432129	46482493	1
ENSG00000140600	0.642395	0.0164091	0.0467366	SH3GL3	protein_coding	15	83447228	83618743	1
ENSG00000226029	0.688377	0.0166457	0.047266	LINC01772	lincRNA	1	16460948	16468481	1
ENSG00000278611	0.597389	0.0168947	0.0479039	ZNF426-DT	lincRNA	19	9538733	9539734	1
ENSG00000271943	0.741507	0.0169932	0.0481369	AC098614.4	lincRNA	3	27638315	27638776	1
ENSG00000143882	0.653506	0.0170673	0.0483159	ATP6V1C2	protein_coding	2	10721100	10785110	1
ENSG00000224729	0.728783	0.0171556	0.0485427	PCOLCE-AS1	antisense	7	100589402	100604206	-1
ENSG00000233757	0.731438	0.0173759	0.0490955	AC092835.1	protein_coding	2	95207535	95259774	1
ENSG00000180139	0.591125	0.0175144	0.0494404	ACTA2-AS1	antisense	10	88932390	88940820	1
ENSG00000263335	0.65483	0.017702	0.0498497	AF001548.2	antisense	16	15726674	15732993	1

## Sheet: a549 24h_down
ensembl_gene_id	log2FoldChange	pvalue	FDR	external_gene_name	gene_biotype	chromosome_name	start_position	end_position	strand
ENSG00000100644	-1.05965	7.93e-68	2.3e-65	HIF1A	protein_coding	14	61695513	61748259	1
ENSG00000143819	-1.34712	4.08e-67	1.15e-64	EPHX1	protein_coding	1	225810092	225845563	1
ENSG00000146072	-1.02055	9.19e-50	1.61e-47	TNFRSF21	protein_coding	6	47231532	47309905	-1
ENSG00000019186	-1.60042	2.81e-45	4.44e-43	CYP24A1	protein_coding	20	54153449	54173973	-1
ENSG00000165271	-1.06105	1.45e-43	2.17e-41	NOL6	protein_coding	9	33461441	33473930	-1
ENSG00000205426	-0.752296	1.47e-43	2.19e-41	KRT81	protein_coding	12	52285913	52291534	-1
ENSG00000101871	-0.928053	2.05e-41	2.75e-39	MID1	protein_coding	X	10445310	10833654	-1
ENSG00000138061	-1.33094	1.08e-38	1.32e-36	CYP1B1	protein_coding	2	38066973	38109902	-1
ENSG00000138074	-0.97075	5.22e-37	6e-35	SLC5A6	protein_coding	2	27199587	27212958	-1
ENSG00000112576	-1.01328	1.27e-34	1.33e-32	CCND3	protein_coding	6	41934933	42050357	-1
ENSG00000114767	-1.1542	1.52e-34	1.58e-32	RRP9	protein_coding	3	51933430	51941941	-1
ENSG00000108602	-1.40289	2.06e-33	2.06e-31	ALDH3A1	protein_coding	17	19737984	19748943	-1
ENSG00000132768	-0.887977	2.52e-33	2.5e-31	DPH2	protein_coding	1	43970000	43973369	1
ENSG00000211584	-0.996387	5.07e-33	4.99e-31	SLC48A1	protein_coding	12	47753916	47782753	1
ENSG00000132382	-0.893759	7.8e-33	7.59e-31	MYBBP1A	protein_coding	17	4538897	4555631	-1
ENSG00000101224	-0.784203	4.51e-32	4.25e-30	CDC25B	protein_coding	20	3786772	3806121	1
ENSG00000117877	-1.15766	2.49e-31	2.27e-29	CD3EAP	protein_coding	19	45406209	45410766	1
ENSG00000124588	-0.837213	1.72e-30	1.48e-28	NQO2	protein_coding	6	2987987	3028869	1
ENSG00000174177	-1.17967	5.45e-30	4.51e-28	CTU2	protein_coding	16	88706463	88715386	1
ENSG00000136271	-0.745917	2.68e-29	2.14e-27	DDX56	protein_coding	7	44565417	44575051	-1
ENSG00000186283	-0.965347	1.23e-28	9.61e-27	TOR3A	protein_coding	1	179081377	179098023	1
ENSG00000204394	-0.802416	1.34e-27	9.95e-26	VARS	protein_coding	6	31777518	31795953	-1
ENSG00000107833	-0.930299	1.65e-27	1.21e-25	NPM3	protein_coding	10	101781325	101783413	-1
ENSG00000148843	-0.701316	1.65e-27	1.21e-25	PDCD11	protein_coding	10	103396626	103446292	1
ENSG00000261373	-1.3085	2.07e-27	1.52e-25	VPS9D1-AS1	antisense	16	89711856	89718165	1
ENSG00000198917	-0.959699	4.1e-27	2.97e-25	SPOUT1	protein_coding	9	128819651	128829821	-1
ENSG00000100350	-1.00461	2.91e-26	2.01e-24	FOXRED2	protein_coding	22	36487190	36507101	-1
ENSG00000110104	-0.863775	5.8e-26	3.94e-24	CCDC86	protein_coding	11	60842071	60851081	1
ENSG00000136444	-0.807624	7.79e-26	5.22e-24	RSAD1	protein_coding	17	50478800	50485975	1
ENSG00000105447	-0.863447	8.18e-26	5.47e-24	GRWD1	protein_coding	19	48445773	48457022	1
ENSG00000136718	-0.746637	9.32e-26	6.18e-24	IMP4	protein_coding	2	130342225	130347810	1
ENSG00000004478	-0.703275	4.12e-25	2.64e-23	FKBP4	protein_coding	12	2794953	2805423	1
ENSG00000151929	-0.785808	9.95e-25	6.27e-23	BAG3	protein_coding	10	119651370	119677819	1
ENSG00000160818	-0.99347	1.02e-24	6.43e-23	GPATCH4	protein_coding	1	156594487	156601496	-1
ENSG00000072210	-0.832774	1.21e-24	7.51e-23	ALDH3A2	protein_coding	17	19648136	19677598	1
ENSG00000213694	-0.758994	1.38e-24	8.57e-23	S1PR3	protein_coding	9	88990863	89005010	1
ENSG00000135723	-0.683293	5.41e-24	3.26e-22	FHOD1	protein_coding	16	67229387	67247658	-1
ENSG00000052749	-0.684941	6.01e-24	3.59e-22	RRP12	protein_coding	10	97356358	97426076	-1
ENSG00000023839	-0.614552	6.43e-24	3.84e-22	ABCC2	protein_coding	10	99782640	99852594	1
ENSG00000261236	-1.06967	8.85e-24	5.24e-22	BOP1	protein_coding	8	144262102	144291370	-1
ENSG00000096060	-1.15669	1.02e-23	6.03e-22	FKBP5	protein_coding	6	35573585	35728583	-1
ENSG00000161513	-0.924318	1.31e-23	7.67e-22	FDXR	protein_coding	17	74862497	74873031	-1
ENSG00000118894	-0.973324	2.45e-23	1.41e-21	EEF2KMT	protein_coding	16	5084304	5097808	-1
ENSG00000064651	-0.922532	4.47e-23	2.51e-21	SLC12A2	protein_coding	5	128083766	128189688	1
ENSG00000166197	-0.739608	4.74e-23	2.65e-21	NOLC1	protein_coding	10	102152176	102163871	1
ENSG00000063660	-0.976877	5.7e-23	3.16e-21	GPC1	protein_coding	2	240435671	240468078	1
ENSG00000082516	-0.863198	7.53e-23	4.17e-21	GEMIN5	protein_coding	5	154887416	154938209	-1
ENSG00000049130	-0.931111	8.27e-23	4.55e-21	KITLG	protein_coding	12	88492793	88580851	-1
ENSG00000160193	-0.876896	9.02e-23	4.93e-21	WDR4	protein_coding	21	42843094	42879568	-1
ENSG00000115616	-1.00298	1.31e-22	7.09e-21	SLC9A2	protein_coding	2	102619707	102711318	1
ENSG00000141401	-0.732995	2.16e-22	1.16e-20	IMPA2	protein_coding	18	11981025	12030883	1
ENSG00000227057	-0.695517	4.09e-22	2.17e-20	WDR46	protein_coding	6	33279108	33289527	-1
ENSG00000184226	-0.88454	9.52e-22	5e-20	PCDH9	protein_coding	13	66302834	67230445	-1
ENSG00000048162	-0.854912	1.35e-21	7.07e-20	NOP16	protein_coding	5	176383938	176388975	-1
ENSG00000204388	-0.710489	1.59e-21	8.21e-20	HSPA1B	protein_coding	6	31827735	31830255	1
ENSG00000198074	-0.870654	1.66e-21	8.59e-20	AKR1B10	protein_coding	7	134527592	134541408	1
ENSG00000005156	-0.660115	2.07e-21	1.06e-19	LIG3	protein_coding	17	34980494	35009743	1
ENSG00000132600	-0.90576	2.11e-21	1.07e-19	PRMT7	protein_coding	16	68310974	68358563	1
ENSG00000148344	-1.5887	4.74e-21	2.37e-19	PTGES	protein_coding	9	129738331	129753047	-1
ENSG00000188976	-0.741355	1.37e-20	6.7e-19	NOC2L	protein_coding	1	944204	959309	-1
ENSG00000112578	-0.724476	1.73e-20	8.46e-19	BYSL	protein_coding	6	41921188	41933046	1
ENSG00000162975	-1.11821	1.75e-20	8.54e-19	KCNF1	protein_coding	2	10911937	10914225	1
ENSG00000177542	-0.788765	1.94e-20	9.4e-19	SLC25A22	protein_coding	11	790475	798333	-1
ENSG00000105835	-0.717222	2.04e-20	9.83e-19	NAMPT	protein_coding	7	106248285	106286326	-1
ENSG00000173638	-0.867328	2.59e-20	1.24e-18	SLC19A1	protein_coding	21	45493572	45544411	-1
ENSG00000133131	-0.911602	3.09e-20	1.48e-18	MORC4	protein_coding	X	106813871	107000244	-1
ENSG00000177830	-0.700811	3.87e-20	1.83e-18	CHID1	protein_coding	11	867860	915058	-1
ENSG00000161980	-1.08221	4.92e-20	2.3e-18	POLR3K	protein_coding	16	46407	53628	-1
ENSG00000125630	-0.730142	5.99e-20	2.78e-18	POLR1B	protein_coding	2	112541915	112577150	1
ENSG00000187325	-1.46731	6.64e-20	3.06e-18	TAF9B	protein_coding	X	78129748	78139706	-1
ENSG00000159199	-0.88221	1.25e-19	5.67e-18	ATP5MC1	protein_coding	17	48892765	48895871	1
ENSG00000138678	-1.02807	1.27e-19	5.72e-18	GPAT3	protein_coding	4	83535914	83605875	1
ENSG00000131669	-0.634079	1.44e-19	6.48e-18	NINJ1	protein_coding	9	93121489	93134288	-1
ENSG00000181924	-0.654314	1.83e-19	8.16e-18	COA4	protein_coding	11	73872667	73876988	-1
ENSG00000141480	-0.727828	2.44e-19	1.08e-17	ARRB2	protein_coding	17	4710489	4721499	1
ENSG00000169297	-1.28969	2.88e-19	1.27e-17	NR0B1	protein_coding	X	30304206	30309598	-1
ENSG00000167641	-1.03728	4.03e-19	1.75e-17	PPP1R14A	protein_coding	19	38251237	38256591	-1
ENSG00000184967	-0.778424	4.14e-19	1.8e-17	NOC4L	protein_coding	12	132144448	132152473	1
ENSG00000100292	-0.925475	4.68e-19	2.02e-17	HMOX1	protein_coding	22	35380361	35394214	1
ENSG00000080608	-0.763859	4.92e-19	2.11e-17	PUM3	protein_coding	9	2720469	2844241	-1
ENSG00000106927	-2.13997	6.48e-19	2.77e-17	AMBP	protein_coding	9	114060127	114078472	-1
ENSG00000142207	-0.758514	6.77e-19	2.89e-17	URB1	protein_coding	21	32311018	32393026	-1
ENSG00000106780	-0.748947	8.89e-19	3.75e-17	MEGF9	protein_coding	9	120600813	120714470	-1
ENSG00000004799	-1.40739	1.24e-18	5.19e-17	PDK4	protein_coding	7	95583499	95596491	-1
ENSG00000128626	-0.614703	1.35e-18	5.62e-17	MRPS12	protein_coding	19	38930548	38933162	1
ENSG00000179041	-0.778548	1.44e-18	5.96e-17	RRS1	protein_coding	8	66429028	66430733	1
ENSG00000116649	-0.843008	1.57e-18	6.45e-17	SRM	protein_coding	1	11054584	11060024	-1
ENSG00000180340	-0.666658	1.67e-18	6.83e-17	FZD2	protein_coding	17	44557459	44559570	1
ENSG00000104907	-0.6764	1.95e-18	7.92e-17	TRMT1	protein_coding	19	13104902	13117567	-1
ENSG00000242265	-0.796629	2.6e-18	1.05e-16	PEG10	protein_coding	7	94656325	94669695	1
ENSG00000256802	-1.08899	6.25e-18	2.45e-16	AC022613.1	antisense	15	29674990	29680957	1
ENSG00000156697	-0.597911	7.45e-18	2.88e-16	UTP14A	protein_coding	X	129906121	129929761	1
ENSG00000178921	-0.833995	7.66e-18	2.94e-16	PFAS	protein_coding	17	8247618	8270491	1
ENSG00000165376	-1.77698	8.41e-18	3.22e-16	CLDN2	protein_coding	X	106900164	106930861	1
ENSG00000067182	-0.614879	8.98e-18	3.44e-16	TNFRSF1A	protein_coding	12	6328757	6342114	-1
ENSG00000107815	-0.622443	9.3e-18	3.55e-16	TWNK	protein_coding	10	100987367	100994401	1
ENSG00000183751	-0.755719	1.18e-17	4.46e-16	TBL3	protein_coding	16	1972037	1982933	1
ENSG00000111907	-0.968056	1.57e-17	5.86e-16	TPD52L1	protein_coding	6	125119049	125264407	1
ENSG00000140961	-0.674619	1.59e-17	5.9e-16	OSGIN1	protein_coding	16	83948282	83966332	1
ENSG00000166979	-1.10968	1.66e-17	6.14e-16	EVA1C	protein_coding	21	32412006	32515397	1
ENSG00000136875	-0.724839	2.37e-17	8.68e-16	PRPF4	protein_coding	9	113275343	113292905	1
ENSG00000104687	-0.648783	2.55e-17	9.29e-16	GSR	protein_coding	8	30678061	30727999	-1
ENSG00000179958	-0.883342	3.38e-17	1.22e-15	DCTPP1	protein_coding	16	30423619	30430075	-1
ENSG00000168646	-1.47637	4.12e-17	1.48e-15	AXIN2	protein_coding	17	65528563	65561647	-1
ENSG00000169083	-0.646703	4.69e-17	1.66e-15	AR	protein_coding	X	67544032	67730619	1
ENSG00000160932	-0.769697	4.78e-17	1.69e-15	LY6E	protein_coding	8	143017982	143023832	1
ENSG00000145920	-2.32455	6.42e-17	2.24e-15	CPLX2	protein_coding	5	175796310	175884020	1
ENSG00000143924	-0.61	6.6e-17	2.3e-15	EML4	protein_coding	2	42169350	42332548	1
ENSG00000137054	-0.6228	8.89e-17	3.07e-15	POLR1E	protein_coding	9	37485935	37503697	1
ENSG00000165912	-0.7558	1.04e-16	3.58e-15	PACSIN3	protein_coding	11	47177525	47186443	-1
ENSG00000090273	-0.604744	1.15e-16	3.93e-15	NUDC	protein_coding	1	26900238	26946862	1
ENSG00000130204	-0.690069	1.23e-16	4.17e-15	TOMM40	protein_coding	19	44890569	44903689	1
ENSG00000167994	-0.908572	1.23e-16	4.19e-15	RAB3IL1	protein_coding	11	61897301	61920269	-1
ENSG00000136856	-0.914202	1.25e-16	4.23e-15	SLC2A8	protein_coding	9	127397138	127408424	1
ENSG00000175756	-0.596132	1.3e-16	4.39e-15	AURKAIP1	protein_coding	1	1373730	1375495	-1
ENSG00000178996	-0.676156	1.37e-16	4.62e-15	SNX18	protein_coding	5	54517759	54546585	1
ENSG00000134809	-0.799006	1.49e-16	5e-15	TIMM10	protein_coding	11	57528463	57530803	-1
ENSG00000179409	-0.775221	1.84e-16	6.14e-15	GEMIN4	protein_coding	17	744414	753999	-1
ENSG00000076864	-0.901869	1.95e-16	6.49e-15	RAP1GAP	protein_coding	1	21596215	21669363	-1
ENSG00000188807	-0.942413	2.02e-16	6.73e-15	TMEM201	protein_coding	1	9588922	9614873	1
ENSG00000168077	-0.889271	2.17e-16	7.18e-15	SCARA3	protein_coding	8	27633868	27676776	1
ENSG00000074582	-0.771652	2.77e-16	9.1e-15	BCS1L	protein_coding	2	218658764	218663443	1
ENSG00000214706	-0.847468	3.61e-16	1.17e-14	IFRD2	protein_coding	3	50287732	50292918	-1
ENSG00000162377	-0.586218	3.67e-16	1.19e-14	COA7	protein_coding	1	52684451	52698366	-1
ENSG00000119929	-0.756407	3.83e-16	1.24e-14	CUTC	protein_coding	10	99702558	99756134	1
ENSG00000166582	-0.89439	5.1e-16	1.63e-14	CENPV	protein_coding	17	16342534	16353656	-1
ENSG00000148229	-0.786431	5.3e-16	1.69e-14	POLE3	protein_coding	9	113407235	113410672	-1
ENSG00000163053	-1.43581	6.17e-16	1.97e-14	SLC16A14	protein_coding	2	230034974	230068999	-1
ENSG00000171227	-1.74874	6.65e-16	2.12e-14	TMEM37	protein_coding	2	119429901	119438520	1
ENSG00000189306	-0.716955	7.39e-16	2.34e-14	RRP7A	protein_coding	22	42509968	42519802	-1
ENSG00000127586	-0.859328	7.76e-16	2.44e-14	CHTF18	protein_coding	16	788046	800737	1
ENSG00000001497	-0.689978	9.52e-16	2.96e-14	LAS1L	protein_coding	X	65512582	65534775	-1
ENSG00000105825	-0.657247	9.5e-16	2.96e-14	TFPI2	protein_coding	7	93885396	93890991	-1
ENSG00000091129	-0.623006	1.14e-15	3.55e-14	NRCAM	protein_coding	7	108147623	108456717	-1
ENSG00000100714	-0.670936	1.38e-15	4.24e-14	MTHFD1	protein_coding	14	64388031	64463457	1
ENSG00000181019	-0.604097	1.46e-15	4.49e-14	NQO1	protein_coding	16	69706996	69726951	-1
ENSG00000105364	-0.709215	2.91e-15	8.74e-14	MRPL4	protein_coding	19	10251901	10260045	1
ENSG00000183605	-0.823488	3.14e-15	9.37e-14	SFXN4	protein_coding	10	119140767	119165667	-1
ENSG00000121454	-1.29848	3.21e-15	9.56e-14	LHX4	protein_coding	1	180230286	180278982	1
ENSG00000103876	-0.773626	3.23e-15	9.61e-14	FAH	protein_coding	15	80152490	80186946	1
ENSG00000065183	-0.72037	3.67e-15	1.08e-13	WDR3	protein_coding	1	117929720	117966542	1
ENSG00000181817	-0.719771	3.81e-15	1.12e-13	LSM10	protein_coding	1	36391238	36397892	-1
ENSG00000110400	-0.916869	3.95e-15	1.16e-13	NECTIN1	protein_coding	11	119623408	119729084	-1
ENSG00000108578	-0.614045	4.79e-15	1.41e-13	BLMH	protein_coding	17	30248195	30292056	-1
ENSG00000143314	-0.674967	6.2e-15	1.81e-13	MRPL24	protein_coding	1	156737303	156741590	-1
ENSG00000132361	-0.688605	6.29e-15	1.83e-13	CLUH	protein_coding	17	2689386	2712663	-1
ENSG00000108561	-0.682115	6.82e-15	1.98e-13	C1QBP	protein_coding	17	5432777	5448830	-1
ENSG00000116120	-0.831136	6.88e-15	1.99e-13	FARSB	protein_coding	2	222570536	222656337	-1
ENSG00000121057	-0.607204	8.7e-15	2.5e-13	AKAP1	protein_coding	17	57085092	57121349	1
ENSG00000262814	-0.965259	9.37e-15	2.69e-13	MRPL12	protein_coding	17	81703357	81707526	1
ENSG00000186529	-1.498	9.57e-15	2.74e-13	CYP4F3	protein_coding	19	15640897	15662825	1
ENSG00000144120	-0.793396	1.11e-14	3.17e-13	TMEM177	protein_coding	2	119679167	119686507	1
ENSG00000053372	-0.798492	1.21e-14	3.43e-13	MRTO4	protein_coding	1	19251539	19260128	1
ENSG00000073536	-0.621574	1.28e-14	3.63e-13	NLE1	protein_coding	17	35128753	35142315	-1
ENSG00000247077	-0.615017	1.36e-14	3.85e-13	PGAM5	protein_coding	12	132710819	132722734	1
ENSG00000164300	-0.815073	1.78e-14	4.99e-13	SERINC5	protein_coding	5	80111651	80256079	-1
ENSG00000242485	-0.620507	2.5e-14	6.9e-13	MRPL20	protein_coding	1	1401908	1407313	-1
ENSG00000235173	-0.912137	2.6e-14	7.14e-13	HGH1	protein_coding	8	144137769	144140843	1
ENSG00000120800	-0.676672	2.69e-14	7.39e-13	UTP20	protein_coding	12	101280109	101386616	1
ENSG00000135763	-0.695035	2.92e-14	7.96e-13	URB2	protein_coding	1	229626234	229660199	1
ENSG00000213339	-0.629744	2.92e-14	7.96e-13	QTRT1	protein_coding	19	10701430	10713437	1
ENSG00000101311	-0.883145	2.93e-14	7.97e-13	FERMT1	protein_coding	20	6074845	6123544	-1
ENSG00000254858	-0.800528	2.96e-14	8.05e-13	MPV17L2	protein_coding	19	18193182	18196948	1
ENSG00000130881	-0.617448	3.17e-14	8.58e-13	LRP3	protein_coding	19	33177603	33208867	1
ENSG00000148334	-0.687097	3.65e-14	9.82e-13	PTGES2	protein_coding	9	128120693	128128462	-1
ENSG00000070785	-0.871765	3.84e-14	1.03e-12	EIF2B3	protein_coding	1	44850522	44986722	-1
ENSG00000100296	-0.589994	4.16e-14	1.11e-12	THOC5	protein_coding	22	29505879	29555216	-1
ENSG00000165802	-0.648674	4.56e-14	1.22e-12	NSMF	protein_coding	9	137447573	137459334	-1
ENSG00000105197	-0.609011	4.76e-14	1.26e-12	TIMM50	protein_coding	19	39480412	39493785	1
ENSG00000103356	-0.672104	4.91e-14	1.3e-12	EARS2	protein_coding	16	23522014	23557731	-1
ENSG00000164934	-0.644435	5.23e-14	1.38e-12	DCAF13	protein_coding	8	103414714	103443453	1
ENSG00000185163	-0.694757	5.4e-14	1.42e-12	DDX51	protein_coding	12	132136594	132144335	-1
ENSG00000148335	-0.670459	6.02e-14	1.57e-12	NTMT1	protein_coding	9	129608884	129636131	1
ENSG00000149218	-0.855602	6.8e-14	1.77e-12	ENDOD1	protein_coding	11	95089810	95132645	1
ENSG00000100304	-0.77307	7.09e-14	1.84e-12	TTLL12	protein_coding	22	43166622	43187133	-1
ENSG00000178896	-0.749638	8.36e-14	2.17e-12	EXOSC4	protein_coding	8	144078626	144080647	1
ENSG00000100297	-0.870882	8.5e-14	2.2e-12	MCM5	protein_coding	22	35400063	35425430	1
ENSG00000155846	-0.969407	8.56e-14	2.21e-12	PPARGC1B	protein_coding	5	149730298	149855022	1
ENSG00000109971	-0.588073	9.11e-14	2.34e-12	HSPA8	protein_coding	11	123057489	123063230	-1
ENSG00000104356	-0.927743	9.57e-14	2.45e-12	POP1	protein_coding	8	98117297	98159834	1
ENSG00000108528	-0.594856	9.6e-14	2.45e-12	SLC25A11	protein_coding	17	4937130	4940251	-1
ENSG00000146707	-0.904987	1.26e-13	3.17e-12	POMZP3	protein_coding	7	76609986	76627261	-1
ENSG00000152147	-0.774411	1.27e-13	3.19e-12	GEMIN6	protein_coding	2	38751534	38785000	1
ENSG00000204682	-0.88559	1.49e-13	3.74e-12	CASC10	protein_coding	10	21492658	21497262	-1
ENSG00000179091	-0.61242	1.52e-13	3.81e-12	CYC1	protein_coding	8	144095027	144097525	1
ENSG00000203867	-1.11423	1.61e-13	4.03e-12	RBM20	protein_coding	10	110644397	110839469	1
ENSG00000102967	-0.898635	1.67e-13	4.17e-12	DHODH	protein_coding	16	72008588	72027664	1
ENSG00000278535	-0.809856	1.86e-13	4.6e-12	DHRS11	protein_coding	17	36591798	36600806	1
ENSG00000143772	-1.18865	1.91e-13	4.72e-12	ITPKB	protein_coding	1	226631690	226739323	-1
ENSG00000007968	-1.05783	1.92e-13	4.73e-12	E2F2	protein_coding	1	23506430	23531220	-1
ENSG00000126602	-0.728583	2.05e-13	5.04e-12	TRAP1	protein_coding	16	3651639	3717597	-1
ENSG00000170500	-0.737934	2.11e-13	5.17e-12	LONRF2	protein_coding	2	100273291	100322733	-1
ENSG00000116455	-0.73654	2.42e-13	5.9e-12	WDR77	protein_coding	1	111439890	111449376	-1
ENSG00000130826	-0.654744	2.57e-13	6.24e-12	DKC1	protein_coding	X	154762742	154777689	1
ENSG00000197785	-0.695302	2.61e-13	6.31e-12	ATAD3A	protein_coding	1	1512151	1534687	1
ENSG00000160072	-0.777995	2.92e-13	7.04e-12	ATAD3B	protein_coding	1	1471769	1497848	1
ENSG00000160949	-0.789028	2.95e-13	7.08e-12	TONSL	protein_coding	8	144428775	144444444	-1
ENSG00000175567	-0.581372	3.07e-13	7.36e-12	UCP2	protein_coding	11	73974667	73983307	-1
ENSG00000109861	-0.652626	3.57e-13	8.53e-12	CTSC	protein_coding	11	88293592	88337787	-1
ENSG00000065328	-0.983044	3.95e-13	9.36e-12	MCM10	protein_coding	10	13161554	13211104	1
ENSG00000145912	-0.592315	4.06e-13	9.59e-12	NHP2	protein_coding	5	178149460	178153967	-1
ENSG00000188735	-0.623739	4.29e-13	1.01e-11	TMEM120B	protein_coding	12	121712752	121783001	1
ENSG00000105676	-0.676126	4.78e-13	1.12e-11	ARMC6	protein_coding	19	19033575	19060311	1
ENSG00000162407	-0.673786	5.13e-13	1.2e-11	PLPP3	protein_coding	1	56494747	56645301	-1
ENSG00000125378	-0.999624	6.23e-13	1.44e-11	BMP4	protein_coding	14	53949736	53958761	-1
ENSG00000165238	-0.989878	6.52e-13	1.51e-11	WNK2	protein_coding	9	93184916	93320572	1
ENSG00000132613	-0.691867	7.41e-13	1.71e-11	MTSS1L	protein_coding	16	70661204	70686066	-1
ENSG00000073111	-0.803701	8.21e-13	1.87e-11	MCM2	protein_coding	3	127598223	127622436	1
ENSG00000101361	-0.728136	8.22e-13	1.87e-11	NOP56	protein_coding	20	2652145	2658393	1
ENSG00000169991	-0.727347	8.71e-13	1.97e-11	IFFO2	protein_coding	1	18904281	18956686	-1
ENSG00000162878	-1.17889	9.25e-13	2.09e-11	PKDCC	protein_coding	2	42048020	42058528	1
ENSG00000188385	-0.902157	1.08e-12	2.42e-11	JAKMIP3	protein_coding	10	132104671	132184809	1
ENSG00000171631	-1.90071	1.08e-12	2.43e-11	P2RY6	protein_coding	11	73264505	73298617	1
ENSG00000142684	-0.706279	1.31e-12	2.9e-11	ZNF593	protein_coding	1	26169871	26170873	1
ENSG00000069011	-0.863805	1.49e-12	3.29e-11	PITX1	protein_coding	5	135027735	135034813	-1
ENSG00000120942	-0.641941	1.53e-12	3.37e-11	UBIAD1	protein_coding	1	11273206	11296049	1
ENSG00000153094	-0.647607	1.59e-12	3.5e-11	BCL2L11	protein_coding	2	111119378	111168447	1
ENSG00000152953	-0.632782	1.73e-12	3.81e-11	STK32B	protein_coding	4	5051442	5500998	1
ENSG00000142494	-1.00971	1.95e-12	4.26e-11	SLC47A1	protein_coding	17	19495385	19579034	1
ENSG00000136717	-0.662061	2.26e-12	4.9e-11	BIN1	protein_coding	2	127048027	127107355	-1
ENSG00000115946	-0.639143	2.31e-12	5e-11	PNO1	protein_coding	2	68157844	68176238	1
ENSG00000162595	-1.67844	2.34e-12	5.06e-11	DIRAS3	protein_coding	1	68045896	68051631	-1
ENSG00000104679	-0.648295	2.6e-12	5.6e-11	R3HCC1	protein_coding	8	23270120	23296279	1
ENSG00000224877	-0.743444	3.09e-12	6.57e-11	NDUFAF8	protein_coding	17	81239239	81241281	1
ENSG00000181449	-0.99374	4.08e-12	8.57e-11	SOX2	protein_coding	3	181711924	181714436	1
ENSG00000184675	-0.817534	4.29e-12	8.97e-11	AMER1	protein_coding	X	64185117	64205744	-1
ENSG00000174446	-0.610308	4.56e-12	9.49e-11	SNAPC5	protein_coding	15	66490135	66497813	-1
ENSG00000184162	-0.738597	4.58e-12	9.54e-11	NR2C2AP	protein_coding	19	19201416	19203424	-1
ENSG00000240065	-0.730655	7.15e-12	1.45e-10	PSMB9	protein_coding	6	32844136	32859585	1
ENSG00000147813	-0.60976	7.58e-12	1.53e-10	NAPRT	protein_coding	8	143574785	143578649	-1
ENSG00000063241	-0.585098	7.58e-12	1.53e-10	ISOC2	protein_coding	19	55452985	55462343	-1
ENSG00000277972	-0.585526	8.05e-12	1.62e-10	CISD3	protein_coding	17	38730235	38735044	1
ENSG00000004399	-0.858504	8.54e-12	1.71e-10	PLXND1	protein_coding	3	129555175	129606818	-1
ENSG00000154743	-0.723824	9.05e-12	1.81e-10	TSEN2	protein_coding	3	12484432	12539623	1
ENSG00000105671	-0.585821	9.06e-12	1.81e-10	DDX49	protein_coding	19	18919675	18928633	1
ENSG00000136463	-0.590146	9.17e-12	1.83e-10	TACO1	protein_coding	17	63600872	63608365	1
ENSG00000136933	-0.635557	1.05e-11	2.08e-10	RABEPK	protein_coding	9	125200542	125234158	1
ENSG00000243232	-1.12821	1.06e-11	2.09e-10	PCDHAC2	protein_coding	5	140966235	141012344	1
ENSG00000165724	-0.654296	1.19e-11	2.33e-10	ZMYND19	protein_coding	9	137582079	137590490	-1
ENSG00000065057	-0.755053	1.19e-11	2.34e-10	NTHL1	protein_coding	16	2039815	2047866	-1
ENSG00000137713	-0.621607	1.36e-11	2.66e-10	PPP2R1B	protein_coding	11	111726908	111766427	-1
ENSG00000166166	-0.713098	1.52e-11	2.95e-10	TRMT61A	protein_coding	14	103529184	103537073	1
ENSG00000131153	-0.883791	1.72e-11	3.31e-10	GINS2	protein_coding	16	85676198	85690073	-1
ENSG00000130713	-0.661983	1.87e-11	3.58e-10	EXOSC2	protein_coding	9	130693721	130704894	1
ENSG00000176273	-0.799763	2.28e-11	4.33e-10	SLC35G1	protein_coding	10	93893973	93956062	1
ENSG00000139880	-0.841018	2.37e-11	4.49e-10	CDH24	protein_coding	14	23047062	23057538	-1
ENSG00000197905	-0.631908	2.47e-11	4.68e-10	TEAD4	protein_coding	12	2959330	3040673	1
ENSG00000137491	-1.51161	2.54e-11	4.78e-10	SLCO2B1	protein_coding	11	75100563	75206549	1
ENSG00000183978	-0.630298	2.72e-11	5.12e-10	COA3	protein_coding	17	42795147	42798704	-1
ENSG00000175283	-0.601511	2.74e-11	5.14e-10	DOLK	protein_coding	9	128945530	128947619	-1
ENSG00000162174	-0.805092	2.83e-11	5.31e-10	ASRGL1	protein_coding	11	62337448	62393412	1
ENSG00000087245	-1.82175	2.99e-11	5.59e-10	MMP2	protein_coding	16	55389700	55506691	1
ENSG00000167085	-0.625464	3.01e-11	5.63e-10	PHB	protein_coding	17	49404049	49414905	-1
ENSG00000107957	-0.876834	3.29e-11	6.11e-10	SH3PXD2A	protein_coding	10	103594027	103855543	-1
ENSG00000138031	-0.609878	3.37e-11	6.24e-10	ADCY3	protein_coding	2	24819169	24919839	-1
ENSG00000178409	-0.964344	3.53e-11	6.51e-10	BEND3	protein_coding	6	107065182	107115269	-1
ENSG00000167680	-0.91202	3.78e-11	6.96e-10	SEMA6B	protein_coding	19	4542593	4559808	-1
ENSG00000168874	-1.06665	4.16e-11	7.63e-10	ATOH8	protein_coding	2	85751344	85788066	1
ENSG00000081692	-0.650528	4.5e-11	8.2e-10	JMJD4	protein_coding	1	227730425	227735411	-1
ENSG00000170515	-0.719673	4.55e-11	8.28e-10	PA2G4	protein_coding	12	56104319	56113907	1
ENSG00000149499	-0.591158	4.57e-11	8.32e-10	EML3	protein_coding	11	62602218	62612765	-1
ENSG00000167272	-0.586288	5.02e-11	9.09e-10	POP5	protein_coding	12	120578764	120581398	-1
ENSG00000111845	-0.647563	5.27e-11	9.53e-10	PAK1IP1	protein_coding	6	10694695	10709782	1
ENSG00000176225	-0.728233	5.54e-11	9.98e-10	RTTN	protein_coding	18	70003031	70205945	-1
ENSG00000101000	-0.700532	5.56e-11	1e-09	PROCR	protein_coding	20	35172073	35216240	1
ENSG00000066379	-0.732062	5.75e-11	1.03e-09	ZNRD1	protein_coding	6	30058899	30064909	1
ENSG00000121039	-0.625736	6.07e-11	1.09e-09	RDH10	protein_coding	8	73294612	73325281	1
ENSG00000161647	-0.652913	6.13e-11	1.1e-09	MPP3	protein_coding	17	43800799	43833170	-1
ENSG00000166508	-0.669491	6.23e-11	1.11e-09	MCM7	protein_coding	7	100092728	100101940	-1
ENSG00000281398	-0.948872	6.47e-11	1.15e-09	SNHG4	lincRNA	5	139274102	139284899	1
ENSG00000141577	-0.720884	6.9e-11	1.22e-09	CEP131	protein_coding	17	81189593	81222999	-1
ENSG00000073670	-0.992308	7.36e-11	1.3e-09	ADAM11	protein_coding	17	44759031	44781846	1
ENSG00000157214	-0.808795	7.36e-11	1.3e-09	STEAP2	protein_coding	7	90167590	90238137	1
ENSG00000140263	-0.784991	7.58e-11	1.33e-09	SORD	protein_coding	15	45023104	45077185	1
ENSG00000106785	-0.672941	7.62e-11	1.34e-09	TRIM14	protein_coding	9	98069275	98119212	-1
ENSG00000101019	-0.584815	8.25e-11	1.44e-09	UQCC1	protein_coding	20	35302566	35412141	-1
ENSG00000114790	-1.05883	1.15e-10	1.97e-09	ARHGEF26	protein_coding	3	154121003	154257827	1
ENSG00000137513	-0.615411	1.19e-10	2.03e-09	NARS2	protein_coding	11	78435961	78574874	-1
ENSG00000107984	-0.636679	1.21e-10	2.06e-09	DKK1	protein_coding	10	52314296	52318042	1
ENSG00000278619	-0.712766	1.27e-10	2.16e-09	MRM1	protein_coding	17	36601572	36608971	1
ENSG00000002549	-0.63379	1.33e-10	2.26e-09	LAP3	protein_coding	4	17577192	17607972	1
ENSG00000099899	-0.590314	1.54e-10	2.6e-09	TRMT2A	protein_coding	22	20111866	20117392	-1
ENSG00000271303	-0.697278	1.95e-10	3.24e-09	SRXN1	protein_coding	20	646615	653370	-1
ENSG00000138193	-0.706556	2.12e-10	3.5e-09	PLCE1	protein_coding	10	94030812	94332823	1
ENSG00000075131	-0.86605	2.63e-10	4.28e-09	TIPIN	protein_coding	15	66336206	66386746	-1
ENSG00000149483	-0.586112	2.63e-10	4.28e-09	TMEM138	protein_coding	11	61362001	61369509	1
ENSG00000136982	-0.934536	2.95e-10	4.76e-09	DSCC1	protein_coding	8	119833976	119856010	-1
ENSG00000156398	-0.918858	3.05e-10	4.92e-09	SFXN2	protein_coding	10	102714538	102743492	1
ENSG00000117395	-0.654533	3.26e-10	5.25e-09	EBNA1BP2	protein_coding	1	43164175	43270936	-1
ENSG00000112118	-0.712275	4.12e-10	6.55e-09	MCM3	protein_coding	6	52264009	52284881	-1
ENSG00000239306	-0.689538	4.4e-10	6.93e-09	RBM14	protein_coding	11	66616582	66627347	1
ENSG00000104524	-0.647593	4.66e-10	7.34e-09	PYCR3	protein_coding	8	143603913	143609773	-1
ENSG00000210112	-2.78415	5.31e-10	8.25e-09	MT-TM	Mt_tRNA	MT	4402	4469	1
ENSG00000221829	-0.636713	5.33e-10	8.28e-09	FANCG	protein_coding	9	35073835	35080016	-1
ENSG00000189007	-0.98394	5.46e-10	8.46e-09	ADAT2	protein_coding	6	143422832	143450673	-1
ENSG00000239521	-1.01957	5.64e-10	8.71e-09	CASTOR3	protein_coding	7	100200653	100272232	-1
ENSG00000120068	-0.878856	6.08e-10	9.32e-09	HOXB8	protein_coding	17	48611377	48614939	-1
ENSG00000117983	-2.64245	7.24e-10	1.1e-08	MUC5B	protein_coding	11	1223066	1262172	1
ENSG00000114491	-0.616522	7.53e-10	1.14e-08	UMPS	protein_coding	3	124730366	124749273	1
ENSG00000171903	-0.763245	7.95e-10	1.2e-08	CYP4F11	protein_coding	19	15912367	15934867	-1
ENSG00000183579	-0.658832	8.73e-10	1.31e-08	ZNRF3	protein_coding	22	28883592	29057487	1
ENSG00000169684	-0.817692	9.28e-10	1.39e-08	CHRNA5	protein_coding	15	78565520	78595269	1
ENSG00000146828	-0.607417	9.34e-10	1.4e-08	SLC12A9	protein_coding	7	100826820	100867009	1
ENSG00000239672	-0.602191	9.57e-10	1.43e-08	NME1	protein_coding	17	51153536	51162428	1
ENSG00000163050	-0.646692	9.71e-10	1.45e-08	COQ8A	protein_coding	1	226897536	226987545	1
ENSG00000141576	-0.590879	9.83e-10	1.47e-08	RNF157	protein_coding	17	76142453	76240373	-1
ENSG00000105607	-0.668872	9.92e-10	1.48e-08	GCDH	protein_coding	19	12891026	12914207	1
ENSG00000237943	-0.940841	1.11e-09	1.64e-08	PRKCQ-AS1	processed_transcript	10	6580419	6616452	1
ENSG00000130748	-0.5813	1.27e-09	1.87e-08	TMEM160	protein_coding	19	47045907	47048630	-1
ENSG00000240184	-0.886358	1.38e-09	2e-08	PCDHGC3	protein_coding	5	141475947	141512979	1
ENSG00000158089	-0.621322	1.87e-09	2.67e-08	GALNT14	protein_coding	2	30910467	31155202	-1
ENSG00000165572	-0.749205	1.94e-09	2.77e-08	KBTBD6	protein_coding	13	41127569	41132746	-1
ENSG00000147536	-0.725342	2.09e-09	2.96e-08	GINS4	protein_coding	8	41529206	41545046	1
ENSG00000164077	-0.816635	2.38e-09	3.34e-08	MON1A	protein_coding	3	49907160	49930173	-1
ENSG00000210100	-3.25589	2.46e-09	3.45e-08	MT-TI	Mt_tRNA	MT	4263	4331	1
ENSG00000171492	-0.677356	2.62e-09	3.66e-08	LRRC8D	protein_coding	1	89821014	89936611	1
ENSG00000185238	-0.729232	2.65e-09	3.69e-08	PRMT3	protein_coding	11	20387530	20509294	1
ENSG00000075336	-0.619367	3.26e-09	4.51e-08	TIMM21	protein_coding	18	74148511	74160530	1
ENSG00000063438	-0.77608	3.29e-09	4.54e-08	AHRR	protein_coding	5	304176	438291	1
ENSG00000107949	-0.601106	3.3e-09	4.54e-08	BCCIP	protein_coding	10	125823546	125853695	1
ENSG00000167670	-0.646524	3.5e-09	4.8e-08	CHAF1A	protein_coding	19	4402662	4445018	1
ENSG00000086189	-0.639686	3.82e-09	5.2e-08	DIMT1	protein_coding	5	62387254	62403939	-1
ENSG00000203883	-1.33066	3.92e-09	5.33e-08	SOX18	protein_coding	20	64047582	64049641	-1
ENSG00000182173	-0.723561	3.94e-09	5.34e-08	TSEN54	protein_coding	17	75516060	75524739	1
ENSG00000159423	-0.6587	4e-09	5.41e-08	ALDH4A1	protein_coding	1	18871430	18902781	-1
ENSG00000131368	-0.653874	4.72e-09	6.31e-08	MRPS25	protein_coding	3	15042460	15065335	-1
ENSG00000087253	-0.602383	4.78e-09	6.39e-08	LPCAT2	protein_coding	16	55508998	55586670	1
ENSG00000164045	-0.758914	5.12e-09	6.8e-08	CDC25A	protein_coding	3	48157146	48188402	-1
ENSG00000185090	-0.623711	5.28e-09	7e-08	MANEAL	protein_coding	1	37793802	37801137	1
ENSG00000140284	-0.730926	6.65e-09	8.69e-08	SLC27A2	protein_coding	15	50182196	50236395	1
ENSG00000113460	-0.594184	7.24e-09	9.42e-08	BRIX1	protein_coding	5	34915376	34925996	1
ENSG00000163251	-0.59522	8.21e-09	1.06e-07	FZD5	protein_coding	2	207762586	207769563	-1
ENSG00000131462	-0.585614	8.2e-09	1.06e-07	TUBG1	protein_coding	17	42609676	42615234	1
ENSG00000113532	-1.79898	9.86e-09	1.27e-07	ST8SIA4	protein_coding	5	100806935	100903266	-1
ENSG00000126953	-0.947052	9.95e-09	1.27e-07	TIMM8A	protein_coding	X	101345659	101349196	-1
ENSG00000162062	-0.753496	1.09e-08	1.39e-07	TEDC2	protein_coding	16	2460080	2464963	1
ENSG00000265763	-1.06594	1.15e-08	1.46e-07	ZNF488	protein_coding	10	47365496	47384273	-1
ENSG00000106268	-0.594852	1.19e-08	1.5e-07	NUDT1	protein_coding	7	2242222	2251146	1
ENSG00000088035	-0.695827	1.2e-08	1.52e-07	ALG6	protein_coding	1	63367575	63438562	1
ENSG00000184254	-0.674549	1.24e-08	1.55e-07	ALDH1A3	protein_coding	15	100877714	100916626	1
ENSG00000161981	-0.659215	1.28e-08	1.6e-07	SNRNP25	protein_coding	16	53010	57669	1
ENSG00000164220	-1.25398	1.36e-08	1.7e-07	F2RL2	protein_coding	5	76615482	76623434	-1
ENSG00000102743	-0.772232	1.38e-08	1.72e-07	SLC25A15	protein_coding	13	40789412	40810111	1
ENSG00000109674	-0.704528	1.43e-08	1.78e-07	NEIL3	protein_coding	4	177309836	177362943	1
ENSG00000099901	-0.639549	1.49e-08	1.85e-07	RANBP1	protein_coding	22	20115938	20127357	1
ENSG00000157216	-0.634769	1.78e-08	2.18e-07	SSBP3	protein_coding	1	54225432	54413479	-1
ENSG00000183684	-0.59118	1.97e-08	2.38e-07	ALYREF	protein_coding	17	81887844	81891586	-1
ENSG00000113356	-0.746009	2.09e-08	2.52e-07	POLR3G	protein_coding	5	90471748	90514553	1
ENSG00000111490	-1.07517	2.15e-08	2.57e-07	TBC1D30	protein_coding	12	64780516	64881032	1
ENSG00000204267	-0.684868	2.14e-08	2.57e-07	TAP2	protein_coding	6	32821833	32838780	-1
ENSG00000176422	-0.642476	2.19e-08	2.61e-07	SPRYD4	protein_coding	12	56468567	56479707	1
ENSG00000162894	-0.812355	2.47e-08	2.93e-07	FCMR	protein_coding	1	206904386	206923247	-1
ENSG00000125454	-0.742178	2.58e-08	3.05e-07	SLC25A19	protein_coding	17	75272981	75289510	-1
ENSG00000164338	-0.605714	2.6e-08	3.07e-07	UTP15	protein_coding	5	73565443	73583377	1
ENSG00000132330	-1.09232	2.8e-08	3.27e-07	SCLY	protein_coding	2	238060889	238099413	1
ENSG00000150756	-0.733325	2.86e-08	3.33e-07	FAM173B	protein_coding	5	10226330	10249897	-1
ENSG00000126249	-0.751194	2.96e-08	3.44e-07	PDCD2L	protein_coding	19	34404384	34426168	1
ENSG00000204869	-1.29078	3.01e-08	3.5e-07	IGFL4	protein_coding	19	46039748	46077118	-1
ENSG00000180739	-0.975545	3.41e-08	3.93e-07	S1PR5	protein_coding	19	10512742	10517931	-1
ENSG00000140326	-0.632724	3.72e-08	4.24e-07	CDAN1	protein_coding	15	42723544	42737128	-1
ENSG00000112039	-0.669227	4.48e-08	5.04e-07	FANCE	protein_coding	6	35452356	35467103	1
ENSG00000133119	-0.756005	4.72e-08	5.27e-07	RFC3	protein_coding	13	33818049	33966558	1
ENSG00000085840	-0.696587	4.84e-08	5.41e-07	ORC1	protein_coding	1	52372829	52404459	-1
ENSG00000100479	-0.91252	4.91e-08	5.48e-07	POLE2	protein_coding	14	49643555	49688422	-1
ENSG00000023909	-0.596407	5.08e-08	5.65e-07	GCLM	protein_coding	1	93885205	93909456	-1
ENSG00000162139	-0.710408	5.1e-08	5.66e-07	NEU3	protein_coding	11	74988134	75018893	1
ENSG00000198130	-0.58298	5.2e-08	5.76e-07	HIBCH	protein_coding	2	190189735	190344193	-1
ENSG00000168140	-0.778033	5.45e-08	6e-07	VASN	protein_coding	16	4371848	4383528	1
ENSG00000160712	-0.644376	6.04e-08	6.62e-07	IL6R	protein_coding	1	154405193	154469450	1
ENSG00000196668	-1.53777	6.39e-08	6.98e-07	LINC00173	processed_transcript	12	116533422	116536518	1
ENSG00000186603	-1.7028	6.43e-08	7.01e-07	HPDL	protein_coding	1	45326905	45328533	1
ENSG00000230453	-0.672262	6.62e-08	7.2e-07	ANKRD18B	protein_coding	9	33524394	33573009	1
ENSG00000170442	-0.826352	7.16e-08	7.76e-07	KRT86	protein_coding	12	52249300	52309163	1
ENSG00000156587	-0.584584	7.2e-08	7.79e-07	UBE2L6	protein_coding	11	57551656	57568284	-1
ENSG00000141574	-0.644454	7.4e-08	7.97e-07	SECTM1	protein_coding	17	82321024	82334074	-1
ENSG00000134569	-0.680266	7.64e-08	8.22e-07	LRP4	protein_coding	11	46856868	46918642	-1
ENSG00000134262	-0.583106	9.14e-08	9.71e-07	AP4B1	protein_coding	1	113894748	113905201	-1
ENSG00000159259	-0.76949	9.5e-08	1e-06	CHAF1B	protein_coding	21	36385378	36419015	1
ENSG00000145220	-0.656899	1.04e-07	1.09e-06	LYAR	protein_coding	4	4267701	4290169	-1
ENSG00000267100	-0.723297	1.12e-07	1.18e-06	ILF3-DT	lincRNA	19	10651862	10653844	-1
ENSG00000110080	-0.676335	1.27e-07	1.32e-06	ST3GAL4	protein_coding	11	126355640	126440344	1
ENSG00000134780	-0.750389	1.37e-07	1.41e-06	DAGLA	protein_coding	11	61680433	61747001	1
ENSG00000186481	-0.870107	1.43e-07	1.46e-06	ANKRD20A5P	transcribed_unprocessed_pseudogene	18	14179097	14252140	1
ENSG00000215883	-0.617775	1.47e-07	1.5e-06	CYB5RL	protein_coding	1	54169651	54200036	-1
ENSG00000076003	-0.637979	1.5e-07	1.53e-06	MCM6	protein_coding	2	135839626	135876426	-1
ENSG00000184178	-0.808768	1.55e-07	1.58e-06	SCFD2	protein_coding	4	52872982	53366075	-1
ENSG00000179348	-0.685553	1.56e-07	1.58e-06	GATA2	protein_coding	3	128479427	128493185	-1
ENSG00000165300	-0.677801	1.63e-07	1.66e-06	SLITRK5	protein_coding	13	87672615	87696272	1
ENSG00000168661	-0.822847	1.76e-07	1.77e-06	ZNF30	protein_coding	19	34926903	34945170	1
ENSG00000101220	-0.654958	1.84e-07	1.84e-06	C20orf27	protein_coding	20	3753508	3768387	-1
ENSG00000104140	-0.965284	1.87e-07	1.88e-06	RHOV	protein_coding	15	40872214	40874289	-1
ENSG00000239900	-0.727037	1.88e-07	1.89e-06	ADSL	protein_coding	22	40346500	40390463	1
ENSG00000121210	-0.800669	2.11e-07	2.1e-06	TMEM131L	protein_coding	4	153466346	153636711	1
ENSG00000214826	-0.69355	2.11e-07	2.1e-06	DDX12P	unprocessed_pseudogene	12	9418673	9448229	-1
ENSG00000139631	-0.608018	2.19e-07	2.17e-06	CSAD	protein_coding	12	53157663	53180909	-1
ENSG00000127564	-0.690901	2.29e-07	2.26e-06	PKMYT1	protein_coding	16	2968024	2980539	-1
ENSG00000119969	-0.607662	2.52e-07	2.47e-06	HELLS	protein_coding	10	94501434	94613905	1
ENSG00000128011	-0.810552	2.65e-07	2.58e-06	LRFN1	protein_coding	19	39306568	39315336	-1
ENSG00000198056	-0.702475	2.71e-07	2.63e-06	PRIM1	protein_coding	12	56731596	56752373	-1
ENSG00000164362	-1.04833	2.78e-07	2.7e-06	TERT	protein_coding	5	1253147	1295069	-1
ENSG00000143512	-0.583871	2.83e-07	2.73e-06	HHIPL2	protein_coding	1	222522258	222548103	-1
ENSG00000162616	-0.601115	3.05e-07	2.93e-06	DNAJB4	protein_coding	1	77979175	78017964	1
ENSG00000124191	-0.810214	3.19e-07	3.06e-06	TOX2	protein_coding	20	43914864	44069616	1
ENSG00000132646	-0.646074	3.24e-07	3.1e-06	PCNA	protein_coding	20	5114953	5126626	-1
ENSG00000076356	-1.46082	3.45e-07	3.28e-06	PLXNA2	protein_coding	1	208022242	208244320	-1
ENSG00000209082	-1.20338	3.59e-07	3.4e-06	MT-TL1	Mt_tRNA	MT	3230	3304	1
ENSG00000144354	-0.720992	3.6e-07	3.41e-06	CDCA7	protein_coding	2	173354820	173368997	1
ENSG00000274605	-0.693059	3.71e-07	3.5e-06	AL355338.1	lincRNA	13	100086031	100088848	-1
ENSG00000213337	-0.761841	3.82e-07	3.6e-06	ANKRD39	protein_coding	2	96836611	96858095	-1
ENSG00000078319	-0.690143	3.88e-07	3.65e-06	PMS2P1	unprocessed_pseudogene	7	100320992	100341908	-1
ENSG00000148219	-0.80259	4.04e-07	3.79e-06	ASTN2	protein_coding	9	116425225	117415070	-1
ENSG00000158966	-0.709074	4.22e-07	3.95e-06	CACHD1	protein_coding	1	64470792	64693058	1
ENSG00000187741	-0.640426	4.29e-07	4e-06	FANCA	protein_coding	16	89737549	89816657	-1
ENSG00000116711	-1.00184	4.32e-07	4.02e-06	PLA2G4A	protein_coding	1	186828953	186988981	1
ENSG00000000971	-0.699017	4.31e-07	4.02e-06	CFH	protein_coding	1	196651878	196747504	1
ENSG00000111788	-0.59858	4.38e-07	4.08e-06	AC009533.1	unprocessed_pseudogene	12	9277235	9313241	1
ENSG00000156076	-1.86151	4.47e-07	4.15e-06	WIF1	protein_coding	12	65050626	65121566	-1
ENSG00000210194	-2.0056	4.55e-07	4.22e-06	MT-TE	Mt_tRNA	MT	14674	14742	-1
ENSG00000115380	-0.658782	4.96e-07	4.55e-06	EFEMP1	protein_coding	2	55865967	55924139	-1
ENSG00000184937	-1.10446	5e-07	4.58e-06	WT1	protein_coding	11	32387775	32435630	-1
ENSG00000128849	-0.892908	5.43e-07	4.94e-06	CGNL1	protein_coding	15	57375967	57550727	1
ENSG00000179598	-0.656356	5.55e-07	5.04e-06	PLD6	protein_coding	17	17200995	17206315	-1
ENSG00000132423	-0.62576	6.07e-07	5.48e-06	COQ3	protein_coding	6	99369400	99394204	-1
ENSG00000159231	-0.728532	7.45e-07	6.6e-06	CBR3	protein_coding	21	36134912	36146566	1
ENSG00000164647	-1.00158	7.81e-07	6.88e-06	STEAP1	protein_coding	7	90154375	90164829	1
ENSG00000092470	-0.658269	7.84e-07	6.89e-06	WDR76	protein_coding	15	43826963	43868419	1
ENSG00000123545	-0.670409	7.9e-07	6.94e-06	NDUFAF4	protein_coding	6	96889313	96897881	-1
ENSG00000161682	-0.874322	8.41e-07	7.36e-06	FAM171A2	protein_coding	17	44353215	44363875	-1
ENSG00000131470	-0.614342	8.48e-07	7.42e-06	PSMC3IP	protein_coding	17	42572315	42577831	-1
ENSG00000104738	-0.638565	8.82e-07	7.69e-06	MCM4	protein_coding	8	47960185	47978160	1
ENSG00000006625	-0.657923	9.35e-07	8.12e-06	GGCT	protein_coding	7	30496621	30504844	-1
ENSG00000099998	-1.32326	1.03e-06	8.86e-06	GGT5	protein_coding	22	24219654	24245142	-1
ENSG00000189431	-0.656445	1.05e-06	9.05e-06	RASSF10	protein_coding	11	13009577	13012106	1
ENSG00000120899	-0.60565	1.07e-06	9.14e-06	PTK2B	protein_coding	8	27311482	27459391	1
ENSG00000271270	-0.815533	1.12e-06	9.53e-06	TMCC1-AS1	antisense	3	129893811	129918575	1
ENSG00000149150	-1.19011	1.19e-06	1.01e-05	SLC43A1	protein_coding	11	57484534	57515786	-1
ENSG00000051596	-0.635614	1.22e-06	1.04e-05	THOC3	protein_coding	5	175917873	176034680	-1
ENSG00000130558	-1.09032	1.35e-06	1.13e-05	OLFM1	protein_coding	9	135075422	135121179	1
ENSG00000150907	-0.812354	1.35e-06	1.14e-05	FOXO1	protein_coding	13	40469953	40666597	-1
ENSG00000088836	-0.672867	1.42e-06	1.19e-05	SLC4A11	protein_coding	20	3227417	3239559	-1
ENSG00000164053	-0.630735	1.53e-06	1.27e-05	ATRIP	protein_coding	3	48446710	48467645	1
ENSG00000184831	-0.605142	1.6e-06	1.32e-05	APOO	protein_coding	X	23833353	23907934	-1
ENSG00000187024	-0.645736	2e-06	1.61e-05	PTRH1	protein_coding	9	127690348	127724873	-1
ENSG00000109881	-0.587763	2.12e-06	1.7e-05	CCDC34	protein_coding	11	27330827	27363868	-1
ENSG00000093009	-0.585608	2.64e-06	2.08e-05	CDC45	protein_coding	22	19479459	19520612	1
ENSG00000104983	-0.740524	2.73e-06	2.15e-05	CCDC61	protein_coding	19	45995461	46021318	1
ENSG00000259494	-0.644027	2.76e-06	2.17e-05	MRPL46	protein_coding	15	88459476	88467419	-1
ENSG00000009950	-0.933236	2.92e-06	2.28e-05	MLXIPL	protein_coding	7	73593194	73624543	-1
ENSG00000210154	-1.70803	3.13e-06	2.43e-05	MT-TD	Mt_tRNA	MT	7518	7585	1
ENSG00000093217	-0.595764	3.41e-06	2.61e-05	XYLB	protein_coding	3	38346760	38421348	1
ENSG00000188312	-0.60663	3.44e-06	2.63e-05	CENPP	protein_coding	9	92325484	92620533	1
ENSG00000182841	-0.854094	3.72e-06	2.82e-05	RRP7BP	transcribed_unprocessed_pseudogene	22	42555223	42582038	-1
ENSG00000033050	-0.597062	3.73e-06	2.83e-05	ABCF2	protein_coding	7	151212490	151227230	-1
ENSG00000135587	-0.582941	3.86e-06	2.91e-05	SMPD2	protein_coding	6	109440763	109443919	1
ENSG00000108924	-1.59612	4.1e-06	3.08e-05	HLF	protein_coding	17	55265012	55325065	1
ENSG00000196839	-0.640743	4.33e-06	3.23e-05	ADA	protein_coding	20	44619522	44652233	-1
ENSG00000138587	-0.633352	4.75e-06	3.51e-05	MNS1	protein_coding	15	56421544	56465137	-1
ENSG00000183048	-0.685805	5.06e-06	3.72e-05	SLC25A10	protein_coding	17	81712236	81721016	1
ENSG00000234362	-1.94669	5.11e-06	3.75e-05	LINC01914	lincRNA	2	41931599	41933723	-1
ENSG00000127423	-0.77124	5.63e-06	4.1e-05	AUNIP	protein_coding	1	25831913	25859458	-1
ENSG00000100162	-0.737541	5.78e-06	4.19e-05	CENPM	protein_coding	22	41938721	41947164	-1
ENSG00000013297	-1.19825	6.1e-06	4.4e-05	CLDN11	protein_coding	3	170418865	170454733	1
ENSG00000175906	-0.683892	6.68e-06	4.79e-05	ARL4D	protein_coding	17	43398959	43401137	1
ENSG00000170364	-0.656363	7.12e-06	5.07e-05	SETMAR	protein_coding	3	4303304	4317567	1
ENSG00000082438	-0.703782	7.81e-06	5.5e-05	COBLL1	protein_coding	2	164653624	164843679	-1
ENSG00000164161	-1.34726	7.87e-06	5.55e-05	HHIP	protein_coding	4	144646021	144745271	1
ENSG00000026036	-0.877571	8.83e-06	6.17e-05	RTEL1-TNFRSF6B	protein_coding	20	63659300	63698684	1
ENSG00000106077	-0.651599	9.13e-06	6.36e-05	ABHD11	protein_coding	7	73736094	73738867	-1
ENSG00000139629	-1.25699	9.2e-06	6.4e-05	GALNT6	protein_coding	12	51351247	51392867	-1
ENSG00000267321	-0.654933	9.28e-06	6.45e-05	LINC02001	lincRNA	17	35568109	35574843	1
ENSG00000165490	-0.598382	9.65e-06	6.67e-05	DDIAS	protein_coding	11	82899975	82958277	1
ENSG00000143867	-0.791463	9.69e-06	6.69e-05	OSR1	protein_coding	2	19351485	19358653	-1
ENSG00000170293	-0.67464	9.85e-06	6.79e-05	CMTM8	protein_coding	3	32238679	32370325	1
ENSG00000198848	-0.97348	1.04e-05	7.11e-05	CES1	protein_coding	16	55802851	55833337	-1
ENSG00000255561	-1.29659	1.05e-05	7.18e-05	FDXACB1	protein_coding	11	111874056	111881243	-1
ENSG00000118777	-0.905076	1.1e-05	7.49e-05	ABCG2	protein_coding	4	88090264	88231322	-1
ENSG00000171056	-0.924864	1.2e-05	8.16e-05	SOX7	protein_coding	8	10723768	10730512	-1
ENSG00000092853	-0.625779	1.29e-05	8.69e-05	CLSPN	protein_coding	1	35720218	35769967	-1
ENSG00000246067	-0.667824	1.32e-05	8.87e-05	RAB30-AS1	lincRNA	11	83072066	83106719	1
ENSG00000165272	-2.00296	1.43e-05	9.53e-05	AQP3	protein_coding	9	33441154	33447633	-1
ENSG00000173917	-1.3448	1.44e-05	9.59e-05	HOXB2	protein_coding	17	48540894	48544989	-1
ENSG00000143375	-0.725391	1.46e-05	9.73e-05	CGN	protein_coding	1	151510510	151538692	1
ENSG00000085999	-0.644446	1.71e-05	0.000111916	RAD54L	protein_coding	1	46247688	46278473	1
ENSG00000210077	-2.84054	1.89e-05	0.000122344	MT-TV	Mt_tRNA	MT	1602	1670	1
ENSG00000148459	-0.61864	2.06e-05	0.000131796	PDSS1	protein_coding	10	26697659	26746798	1
ENSG00000199753	-0.800922	2.13e-05	0.000135742	SNORD104	snoRNA	17	64146083	64146152	1
ENSG00000131061	-0.61802	2.22e-05	0.000140434	ZNF341	protein_coding	20	33731657	33792269	1
ENSG00000145703	-1.16102	2.24e-05	0.000141808	IQGAP2	protein_coding	5	76403249	76708132	1
ENSG00000155792	-1.20197	2.41e-05	0.000151761	DEPTOR	protein_coding	8	119873717	120050913	1
ENSG00000143473	-1.00437	2.42e-05	0.000151811	KCNH1	protein_coding	1	210676823	211134180	-1
ENSG00000115556	-1.276	2.56e-05	0.000160107	PLCD4	protein_coding	2	218607765	218637184	1
ENSG00000196562	-0.803013	2.7e-05	0.000167545	SULF2	protein_coding	20	47656348	47786616	-1
ENSG00000112218	-2.75298	2.73e-05	0.000169431	GPR63	protein_coding	6	96794126	96837463	-1
ENSG00000236824	-0.892393	2.95e-05	0.000181454	BCYRN1	scRNA	2	47335315	47335514	1
ENSG00000112561	-0.705696	2.99e-05	0.000183749	TFEB	protein_coding	6	41683978	41736259	-1
ENSG00000258366	-1.30703	3.08e-05	0.000188928	RTEL1	protein_coding	20	63657810	63696253	1
ENSG00000012124	-1.39755	3.14e-05	0.00019211	CD22	protein_coding	19	35319261	35347355	1
ENSG00000215182	-3.3496	3.49e-05	0.000211418	MUC5AC	protein_coding	11	1157953	1201138	1
ENSG00000166823	-0.796782	3.5e-05	0.000212186	MESP1	protein_coding	15	89748661	89751310	-1
ENSG00000258429	-0.618303	3.57e-05	0.000215561	PDF	protein_coding	16	69328621	69330595	-1
ENSG00000183763	-0.589338	3.93e-05	0.000235626	TRAIP	protein_coding	3	49828599	49856574	-1
ENSG00000160172	-0.762811	4.04e-05	0.000241393	FAM86C2P	transcribed_unprocessed_pseudogene	11	67791648	67805336	-1
ENSG00000168306	-1.57991	4.17e-05	0.000248403	ACOX2	protein_coding	3	58505136	58537319	-1
ENSG00000274070	-1.01432	4.28e-05	0.000254006	CASTOR2	protein_coding	7	74964818	75024798	1
ENSG00000267698	-0.952291	4.31e-05	0.000255228	AC002116.2	antisense	19	36014508	36045972	1
ENSG00000062282	-0.696802	4.37e-05	0.000258224	DGAT2	protein_coding	11	75759512	75801535	1
ENSG00000233611	-0.970252	4.47e-05	0.000263789	AC019068.1	antisense	2	236167447	236294927	1
ENSG00000132000	-1.36001	4.71e-05	0.000276736	PODNL1	protein_coding	19	13931187	13953392	-1
ENSG00000180592	-0.933462	4.8e-05	0.000281331	SKIDA1	protein_coding	10	21513478	21526368	-1
ENSG00000169851	-0.775026	4.85e-05	0.000283681	PCDH7	protein_coding	4	30720415	31146805	1
ENSG00000114805	-0.725053	5.02e-05	0.000292615	PLCH1	protein_coding	3	155375580	155745067	-1
ENSG00000041982	-0.631571	5.18e-05	0.000300859	TNC	protein_coding	9	115019578	115118257	-1
ENSG00000143942	-0.697581	5.2e-05	0.00030215	CHAC2	protein_coding	2	53767792	53775196	1
ENSG00000198774	-0.884061	5.72e-05	0.000329285	RASSF9	protein_coding	12	85800697	85836570	-1
ENSG00000182742	-0.82158	6.2e-05	0.00035342	HOXB4	protein_coding	17	48575513	48580111	-1
ENSG00000088727	-0.649548	6.57e-05	0.000371405	KIF9	protein_coding	3	47228026	47283451	-1
ENSG00000145088	-0.637426	7.21e-05	0.000404419	EAF2	protein_coding	3	121835183	121886526	1
ENSG00000120075	-0.665138	7.3e-05	0.000409184	HOXB5	protein_coding	17	48591257	48593961	-1
ENSG00000198695	-0.930772	7.43e-05	0.000415428	MT-ND6	protein_coding	MT	14149	14673	-1
ENSG00000164048	-0.624817	7.43e-05	0.000415495	ZNF589	protein_coding	3	48241100	48299253	1
ENSG00000154188	-1.37734	7.44e-05	0.000415548	ANGPT1	protein_coding	8	107249482	107498055	-1
ENSG00000176153	-2.21471	7.78e-05	0.000432536	GPX2	protein_coding	14	64939152	64942905	-1
ENSG00000168079	-1.41022	8.13e-05	0.000450401	SCARA5	protein_coding	8	27869882	27992727	-1
ENSG00000210117	-1.9429	8.45e-05	0.000465929	MT-TW	Mt_tRNA	MT	5512	5579	1
ENSG00000254093	-0.641728	9.96e-05	0.000537491	PINX1	protein_coding	8	10764963	10839884	-1
ENSG00000255198	-0.813741	0.000113589	0.000605296	SNHG9	lincRNA	16	1964959	1965509	1
ENSG00000134207	-0.899665	0.000121981	0.000644008	SYT6	protein_coding	1	114089291	114153919	-1
ENSG00000168237	-0.709141	0.000129131	0.00067838	GLYCTK	protein_coding	3	52287089	52293476	1
ENSG00000171522	-0.852003	0.000138615	0.000720024	PTGER4	protein_coding	5	40679498	40693735	1
ENSG00000108375	-1.19078	0.000147348	0.000761148	RNF43	protein_coding	17	58352500	58417595	-1
ENSG00000141314	-0.795427	0.000155723	0.000797663	RHBDL3	protein_coding	17	32266176	32324661	1
ENSG00000276386	-0.708694	0.000157687	0.000806393	CNTNAP3P2	unprocessed_pseudogene	9	67059560	67293468	1
ENSG00000162892	-1.61326	0.000159458	0.000813388	IL24	protein_coding	1	206897443	206904139	1
ENSG00000079215	-0.930839	0.000212304	0.0010478	SLC1A3	protein_coding	5	36606355	36688334	1
ENSG00000170458	-0.711589	0.000233217	0.00113832	CD14	protein_coding	5	140631728	140633701	-1
ENSG00000149527	-0.834941	0.000238165	0.00116023	PLCH2	protein_coding	1	2425980	2505530	1
ENSG00000198934	-0.594081	0.000245015	0.00119033	MAGEE1	protein_coding	X	76427724	76431353	1
ENSG00000230650	-1.02633	0.000256227	0.00123902	AC140479.2	processed_pseudogene	2	110360608	110363737	-1
ENSG00000170089	-0.591744	0.000261876	0.00126084	AC106795.1	transcribed_unprocessed_pseudogene	5	177809407	177950732	1
ENSG00000142677	-0.778616	0.00027844	0.00133261	IL22RA1	protein_coding	1	24119771	24143121	-1
ENSG00000271709	-2.61311	0.000304676	0.00144452	AC017033.1	lincRNA	2	120866378	120867403	-1
ENSG00000210196	-0.843963	0.000306222	0.00145107	MT-TP	Mt_tRNA	MT	15956	16023	-1
ENSG00000139679	-1.16266	0.000310071	0.00146656	LPAR6	protein_coding	13	48389567	48444704	-1
ENSG00000204316	-0.656962	0.000320066	0.00150941	MRPL38	protein_coding	17	75898643	75905413	-1
ENSG00000005981	-2.0461	0.000338744	0.00158693	ASB4	protein_coding	7	95478444	95540232	1
ENSG00000164093	-0.775549	0.000367945	0.00171061	PITX2	protein_coding	4	110617423	110642123	-1
ENSG00000170899	-0.641364	0.0003864	0.00178404	GSTA4	protein_coding	6	52977948	52995378	-1
ENSG00000247092	-0.64476	0.000420007	0.00192536	SNHG10	antisense	14	95532297	95534872	-1
ENSG00000146122	-0.775839	0.000448762	0.0020429	DAAM2	protein_coding	6	39792298	39904877	1
ENSG00000230002	-0.935804	0.000455421	0.00207055	ALMS1-IT1	sense_intronic	2	73456764	73459482	1
ENSG00000121690	-0.757206	0.000486567	0.00219246	DEPDC7	protein_coding	11	33015864	33033582	1
ENSG00000174125	-1.00862	0.000496482	0.00223033	TLR1	protein_coding	4	38790677	38856817	-1
ENSG00000069482	-0.651005	0.000590489	0.00261549	GAL	protein_coding	11	68683779	68691175	1
ENSG00000114251	-1.21841	0.000599034	0.00264738	WNT5A	protein_coding	3	55465715	55490539	-1
ENSG00000267296	-1.11497	0.0006124	0.00269703	CEBPA-DT	antisense	19	33302857	33305054	1
ENSG00000138696	-0.75518	0.000639592	0.00279938	BMPR1B	protein_coding	4	94757968	95158448	1
ENSG00000187801	-0.610892	0.000648382	0.00282877	ZFP69B	protein_coding	1	40450102	40463718	1
ENSG00000234912	-0.623504	0.000659657	0.0028723	SNHG20	sense_overlapping	17	77086716	77099902	1
ENSG00000003989	-0.588952	0.000698376	0.00302305	SLC7A2	protein_coding	8	17497088	17570573	1
ENSG00000152402	-0.669559	0.00070504	0.00304669	GUCY1A2	protein_coding	11	106674012	107018524	-1
ENSG00000171791	-0.835893	0.00089206	0.003755	BCL2	protein_coding	18	63123346	63320128	-1
ENSG00000206535	-0.875594	0.000920577	0.0038558	LNP1	protein_coding	3	100401193	100456319	1
ENSG00000119283	-0.866384	0.00105173	0.00433401	TRIM67	protein_coding	1	231162112	231221556	1
ENSG00000134317	-0.628328	0.00121785	0.0049262	GRHL1	protein_coding	2	9951693	10002277	1
ENSG00000187094	-0.711502	0.00124017	0.00500389	CCK	protein_coding	3	42257825	42266207	-1
ENSG00000086548	-2.07061	0.00131653	0.00528394	CEACAM6	protein_coding	19	41750977	41772208	1
ENSG00000171051	-1.0766	0.00139452	0.00556207	FPR1	protein_coding	19	51745172	51804110	-1
ENSG00000210107	-0.825287	0.00145044	0.00575786	MT-TQ	Mt_tRNA	MT	4329	4400	-1
ENSG00000180425	-0.649209	0.0015364	0.00605568	C11orf71	protein_coding	11	114391443	114400511	-1
ENSG00000108551	-0.828738	0.00160903	0.00629156	RASD1	protein_coding	17	17494437	17496395	-1
ENSG00000164920	-0.742424	0.0017254	0.00667149	OSR2	protein_coding	8	98944403	98952104	1
ENSG00000234494	-0.983501	0.0017806	0.00686395	SP2-AS1	antisense	17	47897330	47941410	-1
ENSG00000261071	-1.04189	0.00186707	0.00715523	AL441883.1	antisense	6	13614111	13615155	-1
ENSG00000273899	-0.710351	0.00191037	0.0073006	NOL12	protein_coding	22	37681673	37693478	1
ENSG00000068078	-0.750645	0.00191392	0.00731105	FGFR3	protein_coding	4	1793293	1808872	1
ENSG00000264070	-0.819992	0.00212434	0.00800946	DND1P1	processed_pseudogene	17	45585871	45586929	1
ENSG00000198435	-0.617861	0.00213555	0.00804659	NRARP	protein_coding	9	137300482	137302251	-1
ENSG00000232445	-0.739631	0.00216333	0.00813867	AC006329.1	antisense	7	101308346	101310985	1
ENSG00000124614	-0.751847	0.00222217	0.0083234	RPS10	protein_coding	6	34417454	34426125	-1
ENSG00000246334	-0.650123	0.00224372	0.00839524	PRR7-AS1	antisense	5	177438503	177447699	-1
ENSG00000233184	-0.735669	0.0022856	0.00853032	AC093157.1	antisense	1	101025878	101087268	1
ENSG00000198624	-0.580782	0.00250714	0.00923646	CCDC69	protein_coding	5	151181052	151224145	-1
ENSG00000272636	-0.982055	0.00251214	0.00925105	DOC2B	protein_coding	17	142789	181636	-1
ENSG00000166963	-0.678791	0.00251761	0.00926736	MAP1A	protein_coding	15	43510958	43531620	1
ENSG00000144893	-0.66407	0.00284007	0.0103002	MED12L	protein_coding	3	151085697	151437072	1
ENSG00000198157	-0.609895	0.00285125	0.0103344	HMGN5	protein_coding	X	81113701	81201942	-1
ENSG00000258920	-0.6679	0.00294258	0.0106155	FOXN3-AS1	antisense	14	89417354	89419793	1
ENSG00000104081	-0.66613	0.00322084	0.011478	BMF	protein_coding	15	40087890	40108892	-1
ENSG00000135373	-1.99397	0.00332249	0.0117986	EHF	protein_coding	11	34621093	34661057	1
ENSG00000128594	-1.51643	0.00342224	0.0121212	LRRC4	protein_coding	7	128027071	128032107	-1
ENSG00000250988	-0.743849	0.00359462	0.0126483	SNHG21	antisense	15	82750564	82757206	1
ENSG00000138798	-1.0094	0.00367051	0.012877	EGF	protein_coding	4	109912884	110012266	1
ENSG00000131620	-0.745305	0.00369777	0.0129546	ANO1	protein_coding	11	70078302	70189528	1
ENSG00000280987	-0.694797	0.00375735	0.0131253	MATR3	protein_coding	5	139273752	139331671	1
ENSG00000170439	-0.710697	0.0037737	0.0131737	METTL7B	protein_coding	12	55681546	55684611	1
ENSG00000133321	-0.756721	0.00384465	0.0133767	RARRES3	protein_coding	11	63536809	63546462	1
ENSG00000139187	-0.74317	0.00391434	0.0135578	KLRG1	protein_coding	12	8950044	9010760	1
ENSG00000133937	-1.3418	0.00392956	0.0136026	GSC	protein_coding	14	94768216	94770230	-1
ENSG00000154146	-0.642077	0.00395671	0.0136885	NRGN	protein_coding	11	124739846	124747210	1
ENSG00000260442	-0.660286	0.00400269	0.0138341	ATP2A1-AS1	antisense	16	28878957	28879920	-1
ENSG00000271127	-0.819922	0.00418706	0.0144066	AP000526.1	sense_intronic	22	15796959	15798346	1
ENSG00000172572	-1.32301	0.00426377	0.014645	PDE3A	protein_coding	12	20369245	20684381	1
ENSG00000140538	-2.06749	0.00428345	0.0146967	NTRK3	protein_coding	15	87859751	88256768	-1
ENSG00000279602	-0.936003	0.00433284	0.0148419	AC109326.1	TEC	17	43360041	43361361	-1
ENSG00000228192	-1.03589	0.0044438	0.0151692	AL512353.1	antisense	1	42834681	42846422	-1
ENSG00000230109	-1.84914	0.00467294	0.0158415	AL158209.1	lincRNA	10	21340233	21372950	-1
ENSG00000261884	-0.807686	0.00471758	0.0159745	AC040162.1	protein_coding	16	67929614	67936017	-1
ENSG00000163064	-0.607965	0.0048351	0.016306	EN1	protein_coding	2	118842171	118847678	-1
ENSG00000170523	-0.76365	0.00488156	0.0164449	KRT83	protein_coding	12	52314301	52321398	-1
ENSG00000239791	-1.37513	0.00493033	0.0165997	AC002310.2	antisense	16	30572250	30583860	1
ENSG00000124507	-1.50208	0.00504495	0.0169181	PACSIN1	protein_coding	6	34466061	34535231	1
ENSG00000124664	-0.602245	0.0051226	0.0171428	SPDEF	protein_coding	6	34537802	34556333	-1
ENSG00000137561	-0.819668	0.00521598	0.0174125	TTPA	protein_coding	8	63048553	63086053	-1
ENSG00000173083	-0.635254	0.00529273	0.0176454	HPSE	protein_coding	4	83292461	83335153	-1
ENSG00000256433	-0.62729	0.0053632	0.0178501	AC005840.2	lincRNA	12	6393905	6396148	1
ENSG00000254682	-0.588965	0.00568758	0.0187466	AP002387.1	antisense	11	71448674	71452157	1
ENSG00000258708	-0.755775	0.00579003	0.0190276	SLC25A21-AS1	antisense	14	37171888	37173811	1
ENSG00000200534	-1.15063	0.00605531	0.0197674	SNORA33	snoRNA	6	132817219	132817348	1
ENSG00000247796	-0.585012	0.00643104	0.0208365	AC008966.1	antisense	5	53109842	53115126	1
ENSG00000168913	-1.03139	0.00668001	0.0215368	ENHO	protein_coding	9	34521040	34523041	-1
ENSG00000203930	-0.684603	0.0068909	0.0221602	LINC00632	antisense	X	140709562	140793215	1
ENSG00000196081	-0.603048	0.00716378	0.0229047	ZNF724	protein_coding	19	23221599	23250390	-1
ENSG00000169247	-0.60883	0.00727205	0.0232215	SH3TC2	protein_coding	5	148923639	149063163	-1
ENSG00000167178	-0.990291	0.00747561	0.0237751	ISLR2	protein_coding	15	74100311	74138540	1
ENSG00000137868	-0.904303	0.00758611	0.0240639	STRA6	protein_coding	15	74179466	74212267	-1
ENSG00000230359	-0.913227	0.0079648	0.0251147	TPI1P2	transcribed_processed_pseudogene	7	129055223	129057239	1
ENSG00000263843	-0.666159	0.00835608	0.0262013	AC022211.2	antisense	17	75271369	75273895	1
ENSG00000104889	-0.724108	0.00849172	0.0265467	RNASEH2A	protein_coding	19	12806556	12815201	1
ENSG00000234233	-1.03316	0.00858299	0.026799	KCNH1-IT1	sense_intronic	1	211132588	211133374	-1
ENSG00000227268	-0.588986	0.00904713	0.028016	KLLN	protein_coding	10	87859161	87863437	-1
ENSG00000179240	-0.633892	0.00906993	0.0280768	GVQW3	protein_coding	11	76381313	76414619	1
ENSG00000158246	-0.604962	0.00928954	0.0286465	TENT5B	protein_coding	1	27005020	27012836	-1
ENSG00000143494	-0.610185	0.00932003	0.0287305	VASH2	protein_coding	1	212950520	212992037	1
ENSG00000111885	-0.58025	0.00932625	0.0287447	MAN1A1	protein_coding	6	119177209	119349761	-1
ENSG00000181773	-0.598977	0.00958108	0.0294022	GPR3	protein_coding	1	27392644	27395814	1
ENSG00000108387	-0.689715	0.0104889	0.0318569	38231	protein_coding	17	58520250	58540818	-1
ENSG00000259479	-0.771902	0.0105393	0.0319936	SORD2P	transcribed_unprocessed_pseudogene	15	44825747	44884694	-1
ENSG00000261783	-0.870688	0.0114454	0.0343148	AC009054.2	sense_intronic	16	75379818	75381260	-1
ENSG00000231566	-0.942403	0.0115152	0.0344851	LINC02595	lincRNA	X	45848074	45851490	-1
ENSG00000078725	-0.929576	0.0121117	0.036014	BRINP1	protein_coding	9	119153458	119369467	-1
ENSG00000137869	-0.883876	0.0121199	0.0360322	CYP19A1	protein_coding	15	51208057	51338610	-1
ENSG00000167676	-0.866926	0.0122231	0.0363084	PLIN4	protein_coding	19	4502180	4518465	-1
ENSG00000143416	-0.739605	0.0124936	0.0370128	SELENBP1	protein_coding	1	151364302	151372733	-1
ENSG00000127084	-0.740966	0.0132308	0.0388708	FGD3	protein_coding	9	92947451	93036236	1
ENSG00000125848	-0.582198	0.013286	0.0390079	FLRT3	protein_coding	20	14322988	14337616	-1
ENSG00000235180	-0.829325	0.0139902	0.0407581	LINC00601	lincRNA	10	126413869	126421879	-1
ENSG00000261033	-0.752862	0.0141557	0.0411993	AC005730.2	antisense	17	20008051	20009234	-1
ENSG00000279140	-0.750574	0.0143232	0.0416391	AL590326.1	TEC	14	104815449	104815753	-1
ENSG00000271857	-0.770457	0.0153215	0.0441139	AL096865.1	antisense	6	45421079	45422005	-1
ENSG00000201512	-0.769582	0.0157825	0.0451697	SNORA71C	snoRNA	20	38429670	38429803	-1
ENSG00000236809	-0.718968	0.0160109	0.0457348	SNX25P1	unprocessed_pseudogene	1	211417025	211417934	1
ENSG00000140807	-0.702589	0.0160511	0.0458421	NKD1	protein_coding	16	50548330	50649249	1
ENSG00000136040	-0.719719	0.0175383	0.049499	PLXNC1	protein_coding	12	94148723	94307675	1
ENSG00000235472	-0.67807	0.0176305	0.0497119	EIF4A1P7	processed_pseudogene	13	28598833	28600052	1
