# Supplementary material for: Regulation of chromatin accessibility by hypoxia and HIF
Source: Biochem J. 2022 Mar 28;479(6):767–86. doi: 10.1042/BCJ20220008 (PMC9022986; doi:10.1042/BCJ20220008)
Supplement: Supplementary Material 5 [file BCJ-479-767-s5.pdf]

## Sheet: 24h Hxp up ATAC and RNA
seqnames	start	end	width	strand	Conc	Conc_24hpx	Conc_0hpx	Fold	p.value	FDR	annotation	geneChr	geneStart	geneEnd	geneLength	geneStrand	geneId	transcriptId	distanceToTSS	ENTREZID	SYMBOL	GENENAME
9	35673354	35674525	1172	*	11.09	11.69	10.02	1.68	4.12e-127	2.97e-122	Promoter (<=1kb)	454	35673918	35681155	7238	1	ENSG00000107159	ENST00000617161	0	768	CA9	carbonic anhydrase 9
6	44074336	44075852	1517	*	11.06	11.41	10.59	0.82	1.52e-33	2.18e-29	Promoter (<=1kb)	451	43995723	44074652	78930	2	ENSG00000237686	ENST00000422059	0	101929705	LOC101929705	uncharacterized LOC101929705
8	133216278	133217436	1159	*	11.32	11.67	10.86	0.81	3.3e-33	3.97e-29	Intron (ENST00000377862/ENSG00000104415, intron 1 of 2)	453	133237176	133241527	4352	2	ENSG00000104419	ENST00000521438	24091	10397	NDRG1	N-myc downstream regulated 1
3	129586664	129588186	1523	*	10.63	11.05	10.02	1.03	1.75e-31	1.8e-27	Promoter (<=1kb)	448	129583631	129586685	3055	2	ENSG00000004399	ENST00000505665	0	23129	PLXND1	plexin D1
12	131901930	131902778	849	*	10.62	10.99	10.11	0.88	4.08e-27	2.68e-23	Intron (ENST00000321867/ENSG00000177169, intron 3 of 27)	457	131906490	131909996	3507	1	ENSG00000177169	ENST00000537421	-3712	8408	ULK1	unc-51 like autophagy activating kinase 1
9	2427368	2427952	585	*	7.28	8.06	5.42	2.64	1.16e-26	6.94e-23	Promoter (1-2kb)	454	2421926	2425957	4032	2	ENSG00000236404	ENST00000653709	-1411	401491	VLDLR-AS1	VLDLR antisense RNA 1
19	2087015	2087555	541	*	9.01	9.55	8.15	1.4	4e-26	2.22e-22	Promoter (1-2kb)	464	2078446	2085652	7207	2	ENSG00000172081	ENST00000586676	-1363	126308	MOB3A	MOB kinase activator 3A
1	180166891	180168566	1676	*	11.46	11.76	11.09	0.66	5.56e-22	2e-18	Intron (ENST00000367602/ENSG00000116260, intron 2 of 11)	446	180154897	180198034	43138	1	ENSG00000116260	ENST00000367600	11994	5768	QSOX1	quiescin sulfhydryl oxidase 1
20	35617392	35617948	557	*	10.32	10.67	9.87	0.8	3.26e-19	9.04e-16	Promoter (<=1kb)	465	35617689	35620934	3246	1	ENSG00000061656	ENST00000498203	0	6676	SPAG4	sperm associated antigen 4
8	133217753	133218409	657	*	10.15	10.48	9.73	0.74	3.41e-17	7.93e-14	Intron (ENST00000377862/ENSG00000104415, intron 1 of 2)	453	133237176	133241527	4352	2	ENSG00000104419	ENST00000521438	23118	10397	NDRG1	N-myc downstream regulated 1
7	158863256	158864504	1249	*	10.73	11.02	10.37	0.65	6.71e-17	1.51e-13	Intron (ENST00000407559/ENSG00000126870, intron 1 of 24)	452	158869446	158871499	2054	1	ENSG00000126870	ENST00000397143	-4942	55112	WDR60	WD repeat domain 60
17	7440023	7441135	1113	*	10.42	10.72	10.05	0.67	1.6e-16	3.39e-13	Promoter (<=1kb)	462	7440742	7443556	2815	1	ENSG00000161958	ENST00000575398	0	2256	FGF11	fibroblast growth factor 11
17	40312088	40312680	593	*	10.98	11.28	10.6	0.67	3.07e-16	5.98e-13	Promoter (2-3kb)	462	40309192	40348336	39145	1	ENSG00000131759	ENST00000577646	2896	5914	RARA	retinoic acid receptor alpha
19	18225812	18226451	640	*	9.19	9.57	8.68	0.89	1.23e-15	2.07e-12	Promoter (<=1kb)	464	18210831	18226425	15595	2	ENSG00000105650	ENST00000599188	0	5143	PDE4C	phosphodiesterase 4C
17	44972812	44973380	569	*	10.14	10.46	9.74	0.71	1.41e-14	2.16e-11	Intron (ENST00000678938/ENSG00000136448, intron 1 of 11)	462	44959693	44968303	8611	2	ENSG00000131094	ENST00000253407	-4509	10882	C1QL1	complement C1q like 1
10	110209501	110210426	926	*	10.07	10.37	9.69	0.68	1.89e-14	2.84e-11	Promoter (<=1kb)	455	110210231	110286506	76276	1	ENSG00000119950	ENST00000361248	0	4601	MXI1	MAX interactor 1, dimerization protein
19	2089698	2090679	982	*	9.51	9.85	9.08	0.77	9.81e-14	1.33e-10	Promoter (<=1kb)	464	2078372	2090176	11805	2	ENSG00000172081	ENST00000591326	0	126308	MOB3A	MOB kinase activator 3A
7	138752403	138753101	699	*	9.71	10.02	9.32	0.71	3.89e-13	4.92e-10	Promoter (2-3kb)	452	138706310	138755901	49592	2	ENSG00000105929	ENST00000644341	2800	50617	ATP6V0A4	ATPase H+ transporting V0 subunit a4
8	133227585	133228776	1192	*	8.79	9.19	8.25	0.94	4.47e-13	5.56e-10	3' UTR	453	133237176	133241527	4352	2	ENSG00000104419	ENST00000521438	12751	10397	NDRG1	N-myc downstream regulated 1
14	33938055	33938969	915	*	10.38	10.64	10.06	0.58	3.48e-12	3.53e-09	Intron (ENST00000250457/ENSG00000129521, intron 1 of 4)	459	33925511	33931336	5826	2	ENSG00000129521	ENST00000556785	-6719	112399	EGLN3	egl-9 family hypoxia inducible factor 3
6	5082475	5083116	642	*	9.89	10.21	9.48	0.73	2.47e-11	2.37e-08	Promoter (2-3kb)	451	5085341	5089487	4147	1	ENSG00000219607	ENST00000405617	-2225	648791	PPP1R3G	protein phosphatase 1 regulatory subunit 3G
5	132263781	132264307	527	*	10.45	10.71	10.13	0.59	4.47e-11	3.98e-08	Promoter (2-3kb)	450	132261449	132271336	9888	1	ENSG00000131435	ENST00000418373	2332	8572	PDLIM4	PDZ and LIM domain 4
1	201791845	201792416	572	*	7.84	8.31	7.14	1.16	6.2e-11	5.19e-08	3' UTR	446	201786550	201803706	17157	1	ENSG00000134369	ENST00000477118	5295	89796	NAV1	neuron navigator 1
2	219298705	219299234	530	*	9.52	9.83	9.14	0.69	2.25e-10	1.69e-07	Promoter (<=1kb)	447	219299002	219304130	5129	1	ENSG00000230432	ENST00000417355	0	NA	NA	NA
20	45781363	45781938	576	*	9.53	9.8	9.2	0.6	3.2e-09	1.79e-06	Promoter (1-2kb)	465	45774213	45779893	5681	2	ENSG00000124116	ENST00000474942	-1470	140686	WFDC3	WAP four-disulfide core domain 3
19	3828345	3829010	666	*	8.82	9.15	8.4	0.76	1.04e-08	4.99e-06	Intron (ENST00000262961/ENSG00000105278, intron 5 of 18)	464	3785247	3802129	16883	2	ENSG00000007264	ENST00000590980	-26216	4145	MATK	megakaryocyte-associated tyrosine kinase
17	6456750	6457394	645	*	8.73	9.05	8.31	0.74	1.89e-08	8.5e-06	Intron (ENST00000262483/ENSG00000091622, intron 19 of 19)	462	6460569	6463881	3313	2	ENSG00000091622	ENST00000575201	6487	83394	PITPNM3	PITPNM family member 3
1	203038114	203038793	680	*	8.82	9.13	8.42	0.71	5e-08	1.87e-05	5' UTR	446	203034484	203078740	44257	1	ENSG00000143847	ENST00000447715	3630	8497	PPFIA4	PTPRF interacting protein alpha 4
22	39252172	39252608	437	*	8.75	9.04	8.38	0.65	4.44e-07	0.000112	Intron (ENST00000641859/ENSG00000284633, intron 1 of 2)	467	39223359	39244982	21624	2	ENSG00000100311	ENST00000331163	-7190	5155	PDGFB	platelet derived growth factor subunit B
X	78064864	78065636	773	*	9.1	9.36	8.78	0.59	5.13e-07	0.000125	Promoter (<=1kb)	468	78065188	78113844	48657	1	ENSG00000102144	ENST00000477335	0	5230	PGK1	phosphoglycerate kinase 1
8	23325793	23326486	694	*	9.12	9.39	8.78	0.61	1.3e-06	0.000258	Promoter (2-3kb)	453	23319927	23328768	8842	2	ENSG00000134013	ENST00000522446	2282	4017	LOXL2	lysyl oxidase like 2
14	34231515	34232023	509	*	7.21	7.63	6.62	1	6.12e-06	0.000837	Intron (ENST00000551935/ENSG00000129521, intron 1 of 4)	459	34096163	34227814	131652	2	ENSG00000129521	ENST00000546681	-3701	112399	EGLN3	egl-9 family hypoxia inducible factor 3
2	73089523	73090047	525	*	8.55	8.84	8.19	0.65	9.84e-06	0.00121	Promoter (<=1kb)	447	73073384	73089655	16272	2	ENSG00000135631	ENST00000493523	0	26056	RAB11FIP5	RAB11 family interacting protein 5
17	72602671	72603429	759	*	8.21	8.5	7.83	0.67	1.32e-05	0.0015	Promoter (<=1kb)	462	72403327	72603162	199836	2	ENSG00000227036	ENST00000649833	0	400619	LINC00511	long intergenic non-protein coding RNA 511
14	49992904	49993366	463	*	8.11	8.42	7.71	0.71	1.32e-05	0.0015	Promoter (<=1kb)	459	49990944	49993121	2178	2	ENSG00000214900	ENST00000658223	0	283551	LINC01588	long intergenic non-protein coding RNA 1588
5	172647983	172648380	398	*	8	8.31	7.61	0.7	2.11e-05	0.00209	Intron (ENST00000369800/ENSG00000214357, intron 1 of 4)	450	172641266	172686925	45660	1	ENSG00000214357	ENST00000522853	6717	54492	NEURL1B	neuralized E3 ubiquitin protein ligase 1B
1	201748302	201748836	535	*	8.38	8.65	8.05	0.61	6.01e-05	0.00449	Intron (ENST00000367302/ENSG00000134369, intron 5 of 29)	446	201739868	201826969	87102	1	ENSG00000134369	ENST00000367295	8434	89796	NAV1	neuron navigator 1
17	72613789	72614342	554	*	8.2	8.47	7.87	0.6	9.56e-05	0.00633	Promoter (<=1kb)	462	72598071	72615134	17064	2	ENSG00000227036	ENST00000647871	792	400619	LINC00511	long intergenic non-protein coding RNA 511
8	28369217	28369731	515	*	7.22	7.58	6.75	0.83	0.000113	0.00717	Intron (ENST00000344423/ENSG00000186918, intron 1 of 9)	453	28365348	28375378	10031	2	ENSG00000186918	ENST00000519730	5647	55893	ZNF395	zinc finger protein 395
7	138740808	138741659	852	*	8.25	8.51	7.93	0.58	0.000186	0.01	Intron (ENST00000310018/ENSG00000105929, intron 14 of 21)	452	138734188	138747675	13488	2	ENSG00000105929	ENST00000471085	6016	50617	ATP6V0A4	ATPase H+ transporting V0 subunit a4
16	73202067	73202773	707	*	7.64	7.96	7.23	0.73	0.000189	0.0101	Intron (ENST00000641206/ENSG00000140836, intron 5 of 17)	461	73232055	73233108	1054	1	ENSG00000261227	ENST00000577171	-29282	NA	NA	NA
19	55352064	55352411	348	*	8.03	8.3	7.7	0.61	0.000202	0.0106	Promoter (<=1kb)	464	55352007	55352168	162	2	ENSG00000160471	ENST00000588586	0	125965	COX6B2	cytochrome c oxidase subunit 6B2
8	49071915	49072459	545	*	7.35	7.68	6.92	0.76	0.00024	0.0121	Promoter (<=1kb)	453	49072344	49076090	3747	1	ENSG00000168333	ENST00000399653	0	492307	PPDPFL	pancreatic progenitor cell differentiation and proliferation factor like
16	58459362	58459720	359	*	7.83	8.1	7.5	0.6	0.000459	0.0185	Intron (ENST00000561906/ENSG00000260186, intron 2 of 3)	461	58462846	58504649	41804	1	ENSG00000103034	ENST00000568999	-3126	65009	NDRG4	NDRG family member 4
10	35789821	35790357	537	*	7.63	7.91	7.27	0.64	0.000803	0.0261	Intron (ENST00000626667/ENSG00000280719, intron 1 of 2)	455	35778302	35800920	22619	1	ENSG00000280719	ENST00000626667	11519	102578074	PCAT5	prostate cancer associated transcript 5

## Sheet: 24h Hpx down ATAC and RNA
seqnames	start	end	width	strand	Conc	Conc_24hpx	Conc_0hpx	Fold	p.value	FDR	annotation	geneChr	geneStart	geneEnd	geneLength	geneStrand	geneId	transcriptId	distanceToTSS	ENTREZID	SYMBOL	GENENAME
10	5032931	5034057	1127	*	8.89	8.57	9.15	-0.58	3.69e-06	0.000577	Promoter (1-2kb)	455	5035354	5102210	66857	1	ENSG00000196139	ENST00000605781	-1297	8644	AKR1C3	aldo-keto reductase family 1 member C3
14	63078519	63079166	648	*	7.91	7.44	8.26	-0.82	4.01e-06	0.000615	Intron (ENST00000394968/ENSG00000140015, intron 1 of 10)	459	62712240	63101866	389627	2	ENSG00000140015	ENST00000394968	22700	27133	KCNH5	potassium voltage-gated channel subfamily H member 5
7	37694130	37695251	1122	*	8.67	8.32	8.95	-0.63	6.53e-06	0.000876	Intron (ENST00000461610/ENSG00000187037, intron 2 of 3)	452	37683872	37741374	57503	1	ENSG00000187037	ENST00000447769	10258	353345	GPR141	G protein-coupled receptor 141
8	107374031	107374604	574	*	7.61	7.14	7.97	-0.83	2.34e-05	0.00226	Intron (ENST00000517746/ENSG00000154188, intron 1 of 8)	453	107251512	107336522	85011	2	ENSG00000154188	ENST00000520734	-37509	284	ANGPT1	angiopoietin 1
7	37730430	37731101	672	*	8.42	8.08	8.69	-0.6	3.83e-05	0.00326	Intron (ENST00000461610/ENSG00000187037, intron 2 of 3)	452	37740394	37741311	918	1	ENSG00000187037	ENST00000334425	-9293	353345	GPR141	G protein-coupled receptor 141
7	37732328	37732860	533	*	8.38	8.06	8.64	-0.58	7.31e-05	0.0052	Intron (ENST00000461610/ENSG00000187037, intron 2 of 3)	452	37740394	37741311	918	1	ENSG00000187037	ENST00000334425	-7534	353345	GPR141	G protein-coupled receptor 141
5	58649575	58650403	829	*	7.85	7.48	8.15	-0.68	0.000141	0.00834	Intron (ENST00000282878/ENSG00000152932, intron 2 of 4)	450	58644364	58794531	150168	1	ENSG00000152932	ENST00000507977	5211	115827	RAB3C	RAB3C, member RAS oncogene family
12	64818141	64818799	659	*	7.61	7.21	7.92	-0.71	0.00017	0.00941	Exon (ENST00000456757/ENSG00000111490, exon 4 of 4)	457	64824647	64881033	56387	1	ENSG00000111490	ENST00000539867	-5848	23329	TBC1D30	TBC1 domain family member 30
10	5020168	5020642	475	*	7.95	7.63	8.22	-0.59	0.000492	0.0193	Promoter (2-3kb)	455	5005995	5018031	12037	2	ENSG00000151632	ENST00000604428	-2137	1646	AKR1C2	aldo-keto reductase family 1 member C2

## Sheet: 24h VH298 ATAC up RNA up
seqnames	start	end	width	strand	Conc	Conc_24v	Conc_0v	Fold	p.value	FDR	annotation	geneChr	geneStart	geneEnd	geneLength	geneStrand	geneId	transcriptId	distanceToTSS	ENTREZID	SYMBOL	GENENAME
9	35673301	35674552	1252	*	10.92	11.52	9.85	1.67	4.79e-63	3.64e-58	Promoter (<=1kb)	454	35673918	35681155	7238	1	ENSG00000107159	ENST00000617161	0	768	CA9	carbonic anhydrase 9
9	2427273	2428116	844	*	8.1	8.87	6.3	2.57	2.8e-32	5.32e-28	Promoter (1-2kb)	454	2421926	2425957	4032	2	ENSG00000236404	ENST00000653709	-1316	401491	VLDLR-AS1	VLDLR antisense RNA 1
12	131901887	131902723	837	*	10.78	11.25	10.09	1.16	2.22e-26	3.38e-22	Intron (ENST00000321867/ENSG00000177169, intron 3 of 27)	457	131906490	131909996	3507	1	ENSG00000177169	ENST00000537421	-3767	8408	ULK1	unc-51 like autophagy activating kinase 1
3	129586661	129588159	1499	*	10.85	11.24	10.32	0.92	1.88e-24	2.38e-20	Promoter (<=1kb)	448	129583631	129586685	3055	2	ENSG00000004399	ENST00000505665	0	23129	PLXND1	plexin D1
8	133216236	133217548	1313	*	11.84	12.21	11.34	0.87	2.34e-21	1.97e-17	Intron (ENST00000377862/ENSG00000104415, intron 1 of 2)	453	133237176	133241527	4352	2	ENSG00000104419	ENST00000521438	23979	10397	NDRG1	N-myc downstream regulated 1
8	133217767	133218408	642	*	10.22	10.6	9.7	0.9	1.76e-17	1.03e-13	Intron (ENST00000377862/ENSG00000104415, intron 1 of 2)	453	133237176	133241527	4352	2	ENSG00000104419	ENST00000521438	23119	10397	NDRG1	N-myc downstream regulated 1
10	110209562	110210454	893	*	9.75	10.14	9.21	0.94	2.35e-15	9.41e-12	Promoter (<=1kb)	455	110210231	110286506	76276	1	ENSG00000119950	ENST00000361248	0	4601	MXI1	MAX interactor 1, dimerization protein
1	3509833	3510955	1123	*	11.13	11.45	10.74	0.71	1.26e-14	4.37e-11	Exon (ENST00000356575/ENSG00000162591, exon 10 of 37)	446	3490925	3496717	5793	2	ENSG00000162591	ENST00000491842	-13116	1953	MEGF6	multiple EGF like domains 6
1	65147311	65149301	1991	*	11.38	11.65	11.05	0.6	2.46e-14	7.8e-11	Promoter (<=1kb)	446	65147549	65226092	78544	1	ENSG00000162433	ENST00000497030	0	205	AK4	adenylate kinase 4
6	5082482	5083126	645	*	9.61	10	9.07	0.93	2.15e-13	5.85e-10	Promoter (2-3kb)	451	5085341	5089487	4147	1	ENSG00000219607	ENST00000405617	-2215	648791	PPP1R3G	protein phosphatase 1 regulatory subunit 3G
1	3515902	3516750	849	*	10.45	10.75	10.07	0.67	5.17e-13	1.36e-09	Intron (ENST00000356575/ENSG00000162591, intron 5 of 36)	446	3489920	3531448	41529	2	ENSG00000162591	ENST00000294599	14698	1953	MEGF6	multiple EGF like domains 6
1	3502839	3503369	531	*	9.76	10.13	9.26	0.88	1.65e-11	3.4e-08	Intron (ENST00000356575/ENSG00000162591, intron 17 of 36)	446	3490925	3496717	5793	2	ENSG00000162591	ENST00000491842	-6122	1953	MEGF6	multiple EGF like domains 6
17	40312074	40312698	625	*	11.11	11.43	10.71	0.72	3.48e-11	6.62e-08	Promoter (2-3kb)	462	40309192	40348336	39145	1	ENSG00000131759	ENST00000577646	2882	5914	RARA	retinoic acid receptor alpha
17	72362099	72363179	1081	*	10.21	10.52	9.8	0.72	2.26e-10	3.73e-07	Intron (ENST00000648631/ENSG00000227036, intron 5 of 5)	462	72323139	72349484	26346	2	ENSG00000227036	ENST00000649595	-12615	400619	LINC00511	long intergenic non-protein coding RNA 511
13	113784726	113785636	911	*	9.47	9.84	8.99	0.85	1.5e-09	2e-06	Intron (ENST00000375353/ENSG00000184497, intron 3 of 8)	458	113799888	113804890	5003	1	ENSG00000184497	ENST00000498692	-14252	348013	TMEM255B	transmembrane protein 255B
19	2086904	2087570	667	*	8.74	9.21	8.02	1.19	2.11e-09	2.56e-06	Promoter (1-2kb)	464	2078446	2085652	7207	2	ENSG00000172081	ENST00000586676	-1252	126308	MOB3A	MOB kinase activator 3A
7	138752398	138753121	724	*	9.44	9.75	9.05	0.7	4.19e-08	3.47e-05	Promoter (2-3kb)	452	138706310	138755901	49592	2	ENSG00000105929	ENST00000644341	2780	50617	ATP6V0A4	ATPase H+ transporting V0 subunit a4
15	60591311	60593148	1838	*	10.42	10.72	10.04	0.68	4.28e-08	3.5e-05	Promoter (<=1kb)	460	60497285	60592541	95257	2	ENSG00000069667	ENST00000449337	0	6095	RORA	RAR related orphan receptor A
14	104735996	104736779	784	*	10.25	10.58	9.81	0.77	5.56e-08	4.39e-05	Promoter (<=1kb)	459	104737143	104747308	10166	1	ENSG00000185100	ENST00000557582	-364	122622	ADSS1	adenylosuccinate synthase 1
8	133227541	133228762	1222	*	9.81	10.13	9.39	0.75	8.68e-08	6.53e-05	3' UTR	453	133237176	133241527	4352	2	ENSG00000104419	ENST00000521438	12765	10397	NDRG1	N-myc downstream regulated 1
1	203037990	203038804	815	*	9.24	9.64	8.68	0.96	1.05e-07	7.73e-05	5' UTR	446	203034484	203078740	44257	1	ENSG00000143847	ENST00000447715	3506	8497	PPFIA4	PTPRF interacting protein alpha 4
19	3828337	3828996	660	*	8.63	9.01	8.12	0.89	2.57e-07	0.000155	Intron (ENST00000262961/ENSG00000105278, intron 5 of 18)	464	3785247	3802129	16883	2	ENSG00000007264	ENST00000590980	-26208	4145	MATK	megakaryocyte-associated tyrosine kinase
10	97433524	97435130	1607	*	8.18	8.57	7.64	0.92	7.33e-07	0.000395	Downstream (<1kb)	455	97427534	97432690	5157	1	ENSG00000171314	ENST00000467867	5990	5223	PGAM1	phosphoglycerate mutase 1
10	77513656	77514451	796	*	9.59	9.88	9.23	0.64	7.33e-07	0.000395	Intron (ENST00000639601/ENSG00000156113, intron 1 of 27)	455	77249431	77498970	249540	2	ENSG00000156113	ENST00000639282	-14686	3778	KCNMA1	potassium calcium-activated channel subfamily M alpha 1
2	26696353	26696810	458	*	7.73	8.15	7.13	1.02	1.22e-06	0.000569	Intron (ENST00000620977/ENSG00000171303, intron 2 of 2)	447	26692722	26733420	40699	1	ENSG00000171303	ENST00000302909	3631	3777	KCNK3	potassium two pore domain channel subfamily K member 3
14	34084831	34085399	569	*	8.86	9.17	8.45	0.72	3.66e-06	0.00132	Intron (ENST00000487915/ENSG00000129521, intron 4 of 5)	459	34127029	34130044	3016	2	ENSG00000129521	ENST00000557521	44645	112399	EGLN3	egl-9 family hypoxia inducible factor 3
17	56887804	56888502	699	*	9.32	9.6	8.97	0.62	4.01e-06	0.00141	Promoter (<=1kb)	462	56888880	56891841	2962	1	ENSG00000262112	ENST00000574826	-378	NA	NA	NA
7	45885366	45885976	611	*	9.28	9.56	8.93	0.62	8.97e-06	0.00266	Promoter (2-3kb)	452	45888360	45893625	5266	1	ENSG00000146678	ENST00000457280	-2384	3484	IGFBP1	insulin like growth factor binding protein 1
19	2089744	2090672	929	*	9.05	9.34	8.68	0.66	1.14e-05	0.00318	Promoter (<=1kb)	464	2078372	2090176	11805	2	ENSG00000172081	ENST00000591326	0	126308	MOB3A	MOB kinase activator 3A
10	35789819	35790364	546	*	7.57	7.96	7.02	0.94	1.58e-05	0.00395	Intron (ENST00000626667/ENSG00000280719, intron 1 of 2)	455	35778302	35800920	22619	1	ENSG00000280719	ENST00000626667	11517	102578074	PCAT5	prostate cancer associated transcript 5
6	44034265	44035356	1092	*	9.35	9.63	9	0.63	2.16e-05	0.00493	Intron (ENST00000422059/ENSG00000237686, intron 1 of 4)	451	44058792	44089288	30497	1	ENSG00000231881	ENST00000665400	-23436	NA	NA	NA
3	149216098	149216838	741	*	8.93	9.22	8.57	0.64	3.69e-05	0.0073	Intron (ENST00000481169/ENSG00000047457, intron 1 of 17)	448	149177785	149221824	44040	2	ENSG00000047457	ENST00000490639	4986	1356	CP	ceruloplasmin
14	34231542	34232052	511	*	7.4	7.79	6.85	0.94	0.000111	0.0157	Intron (ENST00000551935/ENSG00000129521, intron 1 of 4)	459	34096163	34227814	131652	2	ENSG00000129521	ENST00000546681	-3728	112399	EGLN3	egl-9 family hypoxia inducible factor 3
19	18225811	18226364	554	*	8.56	8.86	8.18	0.68	0.000268	0.029	Promoter (<=1kb)	464	18220905	18225786	4882	2	ENSG00000105650	ENST00000610023	-25	5143	PDE4C	phosphodiesterase 4C
1	235642094	235643046	953	*	8.53	8.82	8.15	0.67	0.000341	0.0337	Intron (ENST00000391854/ENSG00000168243, intron 1 of 3)	446	235547685	235649784	102100	2	ENSG00000168243	ENST00000391854	6738	2786	GNG4	G protein subunit gamma 4
7	3267783	3268407	625	*	8.52	8.8	8.16	0.65	0.000396	0.0372	Intron (ENST00000437354/ENSG00000236708, intron 1 of 1)	452	3301252	4269000	967749	1	ENSG00000146555	ENST00000404826	-32845	221935	SDK1	sidekick cell adhesion molecule 1
2	38166	38492	327	*	7.46	7.79	7.04	0.76	0.000642	0.0498	Downstream (<1kb)	447	41220	42952	1733	2	ENSG00000184731	ENST00000460464	4460	642273	FAM110C	family with sequence similarity 110 member C
