# Supplementary material for: Regulation of chromatin accessibility by hypoxia and HIF
Source: Biochem J. 2022 Mar 28;479(6):767–86. doi: 10.1042/BCJ20220008 (PMC9022986; doi:10.1042/BCJ20220008)
Supplement: Supplementary Material 6 [file BCJ-479-767-s6.pdf]

## Sheet: 1h Hpx up HIF1b indep
seqnames	start	end	width	strand	annotation	geneChr	geneStart	geneEnd	geneLength	geneStrand	geneId	transcriptId	distanceToTSS	ENTREZID	SYMBOL	GENENAME
1	121417302	121417914	613	*	Intron (ENST00000417218/ENSG00000227082, intron 1 of 1)	446	121412719	121429274	16556	1	ENSG00000227082	ENST00000445260	4583	107985194	LINC02798	long intergenic non-protein coding RNA 2798
13	83751931	83752737	807	*	Distal Intergenic	458	83650249	83654789	4541	2	ENSG00000286446	ENST00000657985	-97142	NA	NA	NA

## Sheet: 24h Hpx up HIF1b indep
seqnames	start	end	width	strand	annotation	geneChr	geneStart	geneEnd	geneLength	geneStrand	geneId	transcriptId	distanceToTSS	ENTREZID	SYMBOL	GENENAME
1	19754367	19754922	556	*	Intron (ENST00000294543/ENSG00000162542, intron 7 of 15)	446	19682242	19738419	56178	2	ENSG00000162542	ENST00000489814	-15948	255104	TMCO4	transmembrane and coiled-coil domains 4
1	55580901	55581361	461	*	Promoter (<=1kb)	446	55581037	55735002	153966	1	ENSG00000234810	ENST00000422374	0	NA	NA	NA
1	90386803	90387525	723	*	Downstream (<1kb)	446	90389826	90400981	11156	2	ENSG00000287372	ENST00000661553	13456	NA	NA	NA
1	207944520	207944961	442	*	Distal Intergenic	446	207959292	207969329	10038	1	ENSG00000284237	ENST00000638446	-14331	NA	NA	NA
1	220487308	220487851	544	*	Promoter (<=1kb)	446	220485104	220487558	2455	2	ENSG00000231529	ENST00000446169	0	NA	NA	NA
1	231106274	231106961	688	*	Distal Intergenic	446	231117831	231118325	495	2	ENSG00000229595	ENST00000435008	11364	NA	NA	NA
2	55165564	55166013	450	*	Distal Intergenic	447	55175861	55209652	33792	2	ENSG00000162994	ENST00000411884	43639	130162	CLHC1	clathrin heavy chain linker domain containing 1
2	118049348	118050097	750	*	Intron (ENST00000627670/ENSG00000235066, intron 5 of 5)	447	118031840	118055033	23194	1	ENSG00000235066	ENST00000627626	17508	NA	NA	NA
2	214577691	214578259	569	*	3' UTR	447	214510196	214536890	26695	1	ENSG00000224257	ENST00000416430	67495	100885780	VWC2L-IT1	VWC2L intronic transcript 1
3	23728559	23729228	670	*	Distal Intergenic	448	23805955	23807888	1934	1	ENSG00000170142	ENST00000484048	-76727	7324	UBE2E1	ubiquitin conjugating enzyme E2 E1
3	25523059	25523673	615	*	Intron (ENST00000383772/ENSG00000077092, intron 3 of 7)	448	25555543	25555606	64	2	ENSG00000272166	ENST00000607246	31933	NA	NA	NA
3	36219322	36220004	683	*	Distal Intergenic	448	36169767	36170448	682	2	ENSG00000236158	ENST00000454568	-48874	NA	NA	NA
3	179852055	179852559	505	*	Intron (ENST00000392649/ENSG00000114757, intron 5 of 11)	448	179875376	179881609	6234	1	ENSG00000243799	ENST00000466064	-22817	NA	NA	NA
4	71126724	71127322	599	*	Intron (ENST00000649996/ENSG00000080493, intron 2 of 26)	449	71187259	71572083	384825	1	ENSG00000080493	ENST00000264485	-59937	8671	SLC4A4	solute carrier family 4 member 4
4	77481747	77482533	787	*	Intron (ENST00000513871/ENSG00000249036, intron 1 of 2)	449	77394491	77494286	99796	2	ENSG00000249036	ENST00000513871	11753	NA	NA	NA
4	97396686	97397176	491	*	Intron (ENST00000651895/ENSG00000251620, intron 1 of 4)	449	97366926	97490164	123239	1	ENSG00000251620	ENST00000508933	29760	101410545	STPG2-AS1	STPG2 antisense RNA 1
4	113473989	113474487	499	*	Intron (ENST00000394524/ENSG00000145349, intron 14 of 17)	449	113452961	113513842	60882	2	ENSG00000145349	ENST00000513132	39355	817	CAMK2D	calcium/calmodulin dependent protein kinase II delta
5	27830414	27830920	507	*	Distal Intergenic	450	27493359	27496404	3046	1	ENSG00000250337	ENST00000671061	337055	643401	PURPL	p53 upregulated regulator of p53 levels
5	33367423	33367845	423	*	Promoter (<=1kb)	450	33367179	33368778	1600	2	ENSG00000288579	ENST00000673986	933	NA	NA	NA
5	167773557	167774150	594	*	Intron (ENST00000518659/ENSG00000145934, intron 2 of 28)	450	167755003	168263185	508183	1	ENSG00000145934	ENST00000520394	18554	57451	TENM2	teneurin transmembrane protein 2
7	27277529	27278032	504	*	Distal Intergenic	452	27269357	27269678	322	2	ENSG00000213783	ENST00000446039	-7851	NA	NA	NA
7	96954051	96954471	421	*	Downstream (<1kb)	452	96965302	96965481	180	1	ENSG00000274409	ENST00000621599	-10831	NA	NA	NA
7	116836827	116837346	520	*	Intron (ENST00000464223/ENSG00000198898, intron 1 of 3)	452	116862530	116904336	41807	1	ENSG00000198898	ENST00000414148	-25184	830	CAPZA2	capping actin protein of muscle Z-line subunit alpha 2
8	52914844	52915480	637	*	Distal Intergenic	453	52939182	52943734	4553	1	ENSG00000288611	ENST00000674939	-23702	NA	NA	NA
9	27519828	27520689	862	*	Intron (ENST00000262244/ENSG00000120162, intron 1 of 3)	454	27524314	27526498	2185	1	ENSG00000147896	ENST00000276943	-3625	56832	IFNK	interferon kappa
10	66836110	66836483	374	*	Promoter (<=1kb)	455	66837457	66837704	248	1	ENSG00000277056	ENST00000620045	-974	NA	NA	NA
10	99325245	99325618	374	*	Distal Intergenic	455	99329356	99394330	64975	1	ENSG00000119946	ENST00000356713	-3738	26507	CNNM1	cyclin and CBS domain divalent metal cation transport mediator 1
12	102631173	102631803	631	*	Distal Intergenic	457	102513251	102513655	405	2	ENSG00000257254	ENST00000551181	-117518	NA	NA	NA
13	109627991	109628700	710	*	Intron (ENST00000650264/ENSG00000285534, intron 1 of 3)	458	109728282	109730007	1726	1	ENSG00000234854	ENST00000416090	-99582	101409253	LINC00676	long intergenic non-protein coding RNA 676
14	49992904	49993366	463	*	Promoter (<=1kb)	459	49990944	49993121	2178	2	ENSG00000214900	ENST00000658223	0	283551	LINC01588	long intergenic non-protein coding RNA 1588
14	56271838	56272539	702	*	Intron (ENST00000559044/ENSG00000139946, intron 2 of 4)	459	56305838	56306394	557	1	ENSG00000275569	ENST00000612106	-33299	NA	NA	NA
14	100204327	100205004	678	*	Downstream (2-3kb)	459	100238298	100239346	1049	1	ENSG00000100811	ENST00000554371	-33294	7528	YY1	YY1 transcription factor
15	59570282	59570803	522	*	Distal Intergenic	460	59574103	59574222	120	2	ENSG00000201704	ENST00000364834	3419	NA	NA	NA
15	87661439	87662005	567	*	Intron (ENST00000670668/ENSG00000287391, intron 2 of 3)	460	87638688	87668488	29801	1	ENSG00000287391	ENST00000670668	22751	NA	NA	NA
15	90126525	90127470	946	*	Intron (ENST00000561101/ENSG00000259685, intron 3 of 4)	460	90102649	90138016	35368	1	ENSG00000259685	ENST00000561101	23876	NA	NA	NA
16	30541385	30541850	466	*	Distal Intergenic	461	30537202	30538231	1030	2	ENSG00000260494	ENST00000569728	-3154	NA	NA	NA
18	9731320	9731793	474	*	Intron (ENST00000578734/ENSG00000168461, intron 1 of 5)	463	9734882	9735602	721	2	ENSG00000266891	ENST00000578806	3809	NA	NA	NA
22	32539506	32540362	857	*	Promoter (1-2kb)	467	32513692	32541716	28025	2	ENSG00000185666	ENST00000332840	1354	8224	SYN3	synapsin III

## Sheet: 24h Hpx down HIF1b indep
seqnames	start	end	width	strand	annotation	geneChr	geneStart	geneEnd	geneLength	geneStrand	geneId	transcriptId	distanceToTSS	ENTREZID	SYMBOL	GENENAME
1	44720899	44722379	1481	*	Promoter (<=1kb)	446	44721786	44721902	117	2	ENSG00000199377	ENST00000362507	0	26828	RNU5F-1	RNA, U5F small nuclear 1
1	72462189	72462893	705	*	Exon (ENST00000653965/ENSG00000286863, exon 2 of 7)	446	72533764	72583443	49680	1	ENSG00000286863	ENST00000662505	-70871	NA	NA	NA
1	109644657	109645159	503	*	Distal Intergenic	446	109651370	109652099	730	1	ENSG00000235045	ENST00000411964	-6211	NA	NA	NA
1	184947539	184948088	550	*	Intron (ENST00000367511/ENSG00000135842, intron 1 of 13)	446	184791032	184974508	183477	2	ENSG00000135842	ENST00000367511	26420	116496	NIBAN1	niban apoptosis regulator 1
1	210373164	210374917	1754	*	Promoter (<=1kb)	446	210374154	210374267	114	2	ENSG00000200972	ENST00000364102	0	NA	NA	NA
1	218679203	218679794	592	*	Distal Intergenic	446	218541690	218541899	210	2	ENSG00000212610	ENST00000391308	-137304	NA	NA	NA
2	149768194	149768903	710	*	Intron (ENST00000449714/ENSG00000231969, intron 2 of 2)	447	149847909	149957711	109803	1	ENSG00000231969	ENST00000657556	-79006	101929231	MMADHC-DT	MMADHC divergent transcript
2	150174035	150175325	1291	*	Promoter (2-3kb)	447	150171423	150301080	129658	1	ENSG00000230645	ENST00000437118	2612	NA	NA	NA
2	184178073	184179018	946	*	Intron (ENST00000652637/ENSG00000286152, intron 2 of 5)	447	184049467	184187573	138107	2	ENSG00000286152	ENST00000652637	8555	NA	NA	NA
2	188280652	188281378	727	*	Intron (ENST00000434418/ENSG00000231689, intron 1 of 3)	447	188276732	188276844	113	2	ENSG00000200650	ENST00000363780	-3808	NA	NA	NA
3	54307671	54308401	731	*	Intron (ENST00000415676/ENSG00000157445, intron 3 of 38)	448	54272774	54320541	47768	1	ENSG00000157445	ENST00000478466	34897	55799	CACNA2D3	calcium voltage-gated channel auxiliary subunit alpha2delta 3
3	78701438	78702091	654	*	Intron (ENST00000464233/ENSG00000169855, intron 8 of 30)	448	78692888	78714520	21633	2	ENSG00000169855	ENST00000488735	12429	6091	ROBO1	roundabout guidance receptor 1
3	100888749	100889353	605	*	Intron (ENST00000471714/ENSG00000154175, intron 4 of 67)	448	100862311	100885578	23268	2	ENSG00000154175	ENST00000483129	-3171	25890	ABI3BP	ABI family member 3 binding protein
3	106424995	106425418	424	*	Promoter (2-3kb)	448	106367979	106427977	59999	2	ENSG00000286854	ENST00000653375	2559	NA	NA	NA
3	149643053	149643908	856	*	Intron (ENST00000360632/ENSG00000018408, intron 2 of 6)	448	149648997	149650184	1188	2	ENSG00000241985	ENST00000463167	6276	NA	NA	NA
3	160577591	160578192	602	*	Distal Intergenic	448	160584945	160585787	843	1	ENSG00000242285	ENST00000490136	-6753	NA	NA	NA
3	171897809	171898450	642	*	Promoter (2-3kb)	448	171900511	171938062	37552	1	ENSG00000186329	ENST00000469981	-2061	389177	TMEM212	transmembrane protein 212
3	177946930	177947528	599	*	Distal Intergenic	448	177934823	177937662	2840	1	ENSG00000225790	ENST00000450500	12107	NA	NA	NA
3	178146348	178146952	605	*	Intron (ENST00000651726/ENSG00000286003, intron 1 of 3)	448	178028130	178172449	144320	2	ENSG00000286003	ENST00000651726	25497	NA	NA	NA
4	47278010	47278707	698	*	Intron (ENST00000295454/ENSG00000163288, intron 4 of 8)	449	47431960	47438959	7000	1	ENSG00000260918	ENST00000562284	-153253	NA	NA	NA
4	73891721	73892444	724	*	Distal Intergenic	449	73869393	73871308	1916	1	ENSG00000163739	ENST00000395761	22328	2919	CXCL1	C-X-C motif chemokine ligand 1
4	74056522	74057473	952	*	Promoter (1-2kb)	449	74054038	74055399	1362	2	ENSG00000248848	ENST00000513150	-1123	10895	PPBPP2	pro-platelet basic protein pseudogene 2
4	119099149	119099761	613	*	Distal Intergenic	449	119135832	119187789	51958	1	ENSG00000172399	ENST00000307128	-36071	51778	MYOZ2	myozenin 2
4	173236691	173237596	906	*	Intron (ENST00000512285/ENSG00000109586, intron 1 of 5)	449	173268160	173268233	74	1	ENSG00000221296	ENST00000408369	-30564	100422849	MIR548T	microRNA 548t
4	184401404	184401814	411	*	Intron (ENST00000393593/ENSG00000168310, intron 6 of 8)	449	184389022	184418590	29569	2	ENSG00000168310	ENST00000505067	16776	3660	IRF2	interferon regulatory factor 2
5	41883759	41884520	762	*	Distal Intergenic	450	41895068	41895599	532	1	ENSG00000240281	ENST00000494052	-10548	NA	NA	NA
5	65393952	65394710	759	*	Intron (ENST00000381055/ENSG00000049192, intron 7 of 24)	450	65415353	65416222	870	1	ENSG00000205644	ENST00000478174	-20643	NA	NA	NA
5	68505800	68506797	998	*	Downstream (1-2kb)	450	68523878	68530007	6130	1	ENSG00000249588	ENST00000515504	-17081	NA	NA	NA
5	90119332	90120096	765	*	Distal Intergenic	450	90016621	90016720	100	2	ENSG00000264342	ENST00000584845	-102612	100500825	MIR3660	microRNA 3660
5	90534900	90535719	820	*	Intron (ENST00000508842/ENSG00000164199, intron 1 of 3)	450	90519433	90529584	10152	2	ENSG00000176018	ENST00000453259	-5316	116068	LYSMD3	LysM domain containing 3
5	125026959	125027788	830	*	Intron (ENST00000647105/ENSG00000260192, intron 1 of 6)	450	125036638	125150729	114092	1	ENSG00000260192	ENST00000512965	-8850	101927460	LINC02240	long intergenic non-protein coding RNA 2240
5	168061648	168062447	800	*	Exon (ENST00000518659/ENSG00000145934, exon 7 of 29)	450	168033091	168033205	115	2	ENSG00000253065	ENST00000517256	-28443	NA	NA	NA
6	90000089	90000601	513	*	Promoter (<=1kb)	451	90001222	90001506	285	2	ENSG00000222078	ENST00000410146	905	NA	NA	NA
6	133978040	133978820	781	*	Intron (ENST00000416965/ENSG00000028839, intron 1 of 4)	451	133982817	133987499	4683	1	ENSG00000028839	ENST00000477527	-3997	9519	TBPL1	TATA-box binding protein like 1
6	143734673	143735211	539	*	Intron (ENST00000367584/ENSG00000112419, intron 2 of 11)	451	143748928	143765665	16738	1	ENSG00000112419	ENST00000420771	-13717	9749	PHACTR2	phosphatase and actin regulator 2
7	7136054	7137163	1110	*	Distal Intergenic	452	7156934	7238428	81495	1	ENSG00000106392	ENST00000429911	-19771	56913	C1GALT1	core 1 synthase, glycoprotein-N-acetylgalactosamine 3-beta-galactosyltransferase 1
7	37694130	37695251	1122	*	Intron (ENST00000461610/ENSG00000187037, intron 2 of 3)	452	37683872	37741374	57503	1	ENSG00000187037	ENST00000447769	10258	353345	GPR141	G protein-coupled receptor 141
7	37732318	37732860	543	*	Intron (ENST00000461610/ENSG00000187037, intron 2 of 3)	452	37740394	37741311	918	1	ENSG00000187037	ENST00000334425	-7534	353345	GPR141	G protein-coupled receptor 141
7	87375603	87376531	929	*	Promoter (<=1kb)	452	87375873	87382329	6457	1	ENSG00000005469	ENST00000479014	0	54677	CROT	carnitine O-octanoyltransferase
7	88327047	88327807	761	*	Distal Intergenic	452	88270892	88306894	36003	2	ENSG00000127954	ENST00000380079	-20153	79689	STEAP4	STEAP4 metalloreductase
8	5066118	5066873	756	*	Distal Intergenic	453	5072645	5072869	225	2	ENSG00000253262	ENST00000518519	5996	NA	NA	NA
8	17895789	17896500	712	*	Promoter (<=1kb)	453	17891266	17895544	4279	2	ENSG00000104760	ENST00000519055	-245	2267	FGL1	fibrinogen like 1
8	27399757	27400385	629	*	Promoter (2-3kb)	453	27397452	27459386	61935	1	ENSG00000120899	ENST00000517339	2305	2185	PTK2B	protein tyrosine kinase 2 beta
8	37110800	37111443	644	*	Distal Intergenic	453	37095150	37095390	241	1	ENSG00000253650	ENST00000523647	15650	NA	NA	NA
8	58931045	58931806	762	*	Intron (ENST00000361421/ENSG00000198846, intron 3 of 8)	453	58991720	58992938	1219	2	ENSG00000254048	ENST00000518011	61132	NA	NA	NA
8	75194237	75195194	958	*	Intron (ENST00000676364/ENSG00000249395, intron 1 of 2)	453	75167704	75176656	8953	2	ENSG00000253712	ENST00000467082	-17581	NA	NA	NA
8	76580298	76580675	378	*	Promoter (<=1kb)	453	76576551	76579345	2795	2	ENSG00000253681	ENST00000524269	-953	NA	NA	NA
8	77882711	77883419	709	*	Distal Intergenic	453	78148101	78153913	5813	1	ENSG00000254001	ENST00000521879	-264682	NA	NA	NA
8	84288886	84289540	655	*	Intron (ENST00000522613/ENSG00000184672, intron 2 of 2)	453	84184941	84529464	344524	1	ENSG00000184672	ENST00000522647	103945	138046	RALYL	RALY RNA binding protein like
8	118974646	118975691	1046	*	Promoter (<=1kb)	453	118976513	118976619	107	1	ENSG00000207334	ENST00000384604	-822	NA	NA	NA
9	12794015	12794607	593	*	Intron (ENST00000319264/ENSG00000153714, intron 1 of 1)	454	12775668	12777578	1911	1	ENSG00000153714	ENST00000489107	18347	286343	LURAP1L	leucine rich adaptor protein 1 like
9	18038700	18039385	686	*	Intron (ENST00000636209/ENSG00000178031, intron 1 of 3)	454	17906563	18533292	626730	1	ENSG00000178031	ENST00000636209	132137	92949	ADAMTSL1	ADAMTS like 1
10	74432941	74433615	675	*	Intron (ENST00000672429/ENSG00000156110, intron 6 of 9)	455	74423435	74424014	580	2	ENSG00000213731	ENST00000395972	-8927	NA	NA	NA
10	111867471	111868169	699	*	Intron (ENST00000656217/ENSG00000287231, intron 2 of 2)	455	111787233	111989909	202677	2	ENSG00000287231	ENST00000656217	121740	NA	NA	NA
12	20018267	20019110	844	*	Intron (ENST00000536666/ENSG00000256287, intron 1 of 2)	457	20014780	20098868	84089	1	ENSG00000256287	ENST00000536666	3487	100506393	LINC02398	long intergenic non-protein coding RNA 2398
12	88720619	88721572	954	*	Distal Intergenic	457	88601862	88602195	334	1	ENSG00000278011	ENST00000612250	118757	NA	NA	NA
13	57888981	57889966	986	*	Distal Intergenic	458	57991350	57991464	115	1	ENSG00000202422	ENST00000365552	-101384	NA	NA	NA
14	30610487	30611381	895	*	Promoter (<=1kb)	459	30611302	30618232	6931	1	ENSG00000092140	ENST00000549159	0	55632	G2E3	G2/M-phase specific E3 ubiquitin protein ligase
14	63078519	63079166	648	*	Intron (ENST00000394968/ENSG00000140015, intron 1 of 10)	459	62712240	63101866	389627	2	ENSG00000140015	ENST00000394968	22700	27133	KCNH5	potassium voltage-gated channel subfamily H member 5
15	36495389	36496069	681	*	Distal Intergenic	460	36443537	36471016	27480	2	ENSG00000259737	ENST00000558875	-24373	NA	NA	NA
15	65304594	65305612	1019	*	Promoter (<=1kb)	460	65304677	65304792	116	1	ENSG00000200156	ENST00000363286	0	26832	RNU5B-1	RNA, U5B small nuclear 1
17	43272601	43273000	400	*	Promoter (<=1kb)	462	43273101	43273292	192	2	ENSG00000278774	ENST00000613956	292	NA	NA	NA
18	59484365	59485492	1128	*	Intron (ENST00000439986/ENSG00000183287, intron 2 of 10)	463	59430940	59480240	49301	2	ENSG00000183287	ENST00000398179	-4125	147372	CCBE1	collagen and calcium binding EGF domains 1
20	17542948	17543700	753	*	Intron (ENST00000377868/ENSG00000125864, intron 1 of 7)	465	17493905	17531379	37475	2	ENSG00000125864	ENST00000377873	-11569	631	BFSP1	beaded filament structural protein 1
20	52953060	52953565	506	*	Distal Intergenic	465	52972358	53495330	522973	1	ENSG00000182463	ENST00000371497	-18793	128553	TSHZ2	teashirt zinc finger homeobox 2
21	28587450	28588277	828	*	Intron (ENST00000433310/ENSG00000232855, intron 2 of 4)	466	28431159	28577380	146222	2	ENSG00000232855	ENST00000659279	-10070	NA	NA	NA
22	45698801	45699657	857	*	Intron (ENST00000381061/ENSG00000130638, intron 2 of 10)	467	45703973	45738839	34867	1	ENSG00000130638	ENST00000476998	-4316	25814	ATXN10	ataxin 10
X	118152175	118152797	623	*	Distal Intergenic	468	118146063	118146561	499	1	ENSG00000234524	ENST00000420608	6112	NA	NA	NA
X	141924082	141924947	866	*	Distal Intergenic	468	141934496	142740581	806086	1	ENSG00000288098	ENST00000664519	-9549	NA	NA	NA
X	149641512	149642402	891	*	Distal Intergenic	468	149649174	149650124	951	2	ENSG00000229322	ENST00000456494	7722	NA	NA	NA
