# Supplementary material for: Regulation of chromatin accessibility by hypoxia and HIF
Source: Biochem J. 2022 Mar 28;479(6):767–86. doi: 10.1042/BCJ20220008 (PMC9022986; doi:10.1042/BCJ20220008)
Supplement: Supplementary Material 7 [file BCJ-479-767-s7.pdf]

## Sheet: 24h Hpx up Reox sensitive
seqnames	start	end	width	strand	annotation	geneChr	geneStart	geneEnd	geneLength	geneStrand	geneId	transcriptId	distanceToTSS	ENTREZID	SYMBOL	GENENAME
1	3348811	3349605	795	*	Intron (ENST00000511072/ENSG00000142611, intron 3 of 15)	446	3367815	3373928	6114	2	ENSG00000286518	ENST00000665088	24323	NA	NA	NA
1	8201304	8201925	622	*	Promoter (<=1kb)	446	8201518	8215207	13690	1	ENSG00000227634	ENST00000670361	0	102724539	LINC01714	long intergenic non-protein coding RNA 1714
1	8675004	8675367	364	*	Intron (ENST00000337907/ENSG00000142599, intron 2 of 23)	446	8353943	8656371	302429	2	ENSG00000142599	ENST00000400907	-18633	473	RERE	arginine-glutamic acid dipeptide repeats
1	10765688	10766403	716	*	Intron (ENST00000377022/ENSG00000130940, intron 1 of 20)	446	10636604	10796646	160043	2	ENSG00000130940	ENST00000377022	30243	54897	CASZ1	castor zinc finger 1
1	12593571	12594028	458	*	Promoter (2-3kb)	446	12578718	12596308	17591	2	ENSG00000162496	ENST00000430996	2280	9249	DHRS3	dehydrogenase/reductase 3
1	19033851	19034559	709	*	Distal Intergenic	446	19072110	19075511	3402	2	ENSG00000272084	ENST00000606379	40952	NA	NA	NA
1	19045205	19045853	649	*	Distal Intergenic	446	19072110	19075511	3402	2	ENSG00000272084	ENST00000606379	29658	NA	NA	NA
1	19735844	19736217	374	*	Promoter (2-3kb)	446	19682242	19738419	56178	2	ENSG00000162542	ENST00000489814	2202	255104	TMCO4	transmembrane and coiled-coil domains 4
1	19754400	19754919	520	*	Intron (ENST00000294543/ENSG00000162542, intron 7 of 15)	446	19682242	19738419	56178	2	ENSG00000162542	ENST00000489814	-15981	255104	TMCO4	transmembrane and coiled-coil domains 4
1	20411098	20411891	794	*	Promoter (1-2kb)	446	20412304	20413253	950	2	ENSG00000226487	ENST00000421114	1362	NA	NA	NA
1	23214761	23215038	278	*	Distal Intergenic	446	23191895	23194729	2835	2	ENSG00000179546	ENST00000374619	-20032	3352	HTR1D	5-hydroxytryptamine receptor 1D
1	41317327	41317805	479	*	Intron (ENST00000657314/ENSG00000287400, intron 1 of 1)	446	41302932	41306148	3217	2	ENSG00000286640	ENST00000662236	-11179	NA	NA	NA
1	41404246	41404859	614	*	Distal Intergenic	446	41375004	41375669	666	2	ENSG00000229901	ENST00000429109	-28577	101929901	FOXO6-AS1	FOXO6 antisense RNA 1
1	55580901	55581349	449	*	Promoter (<=1kb)	446	55581037	55735002	153966	1	ENSG00000234810	ENST00000422374	0	NA	NA	NA
1	55827291	55827732	442	*	Intron (ENST00000643167/ENSG00000234810, intron 3 of 3)	446	55823816	56070513	246698	1	ENSG00000234810	ENST00000646266	3475	NA	NA	NA
1	56425062	56425608	547	*	Intron (ENST00000641494/ENSG00000284686, intron 3 of 5)	446	56415064	56415962	899	1	ENSG00000223956	ENST00000635434	9998	105378744	LINC01767	long intergenic non-protein coding RNA 1767
1	59116948	59117475	528	*	Intron (ENST00000634569/ENSG00000237352, intron 4 of 5)	446	59132473	59150550	18078	1	ENSG00000237352	ENST00000631169	-14998	NA	NA	NA
1	67339650	67340290	641	*	Intron (ENST00000262345/ENSG00000081985, intron 8 of 15)	446	67326769	67338760	11992	1	ENSG00000081985	ENST00000441640	12881	3595	IL12RB2	interleukin 12 receptor subunit beta 2
1	90386803	90387525	723	*	Downstream (<1kb)	446	90389826	90400981	11156	2	ENSG00000287372	ENST00000661553	13456	NA	NA	NA
1	99808436	99809336	901	*	Distal Intergenic	446	99791662	99791753	92	1	ENSG00000202254	ENST00000365384	16774	NA	NA	NA
1	105664244	105664984	741	*	Distal Intergenic	446	105698039	105698218	180	1	ENSG00000227850	ENST00000419651	-33055	NA	NA	NA
1	109901532	109902072	541	*	Distal Intergenic	446	109895973	109897861	1889	1	ENSG00000261055	ENST00000565955	5559	NA	NA	NA
1	116486441	116486900	460	*	Distal Intergenic	446	116493350	116502634	9285	1	ENSG00000286276	ENST00000660250	-6450	NA	NA	NA
1	117077198	117077805	608	*	Promoter (1-2kb)	446	117075295	117076389	1095	1	ENSG00000116830	ENST00000469638	1903	8458	TTF2	transcription termination factor 2
1	118944150	118944759	610	*	Intron (ENST00000207157/ENSG00000092607, intron 1 of 7)	446	118883047	118914125	31079	2	ENSG00000092607	ENST00000449873	-30025	6913	TBX15	T-box transcription factor 15
1	159910148	159910822	675	*	Promoter (<=1kb)	446	159910094	159910554	461	2	ENSG00000279430	ENST00000623350	0	NA	NA	NA
1	162554135	162554772	638	*	Distal Intergenic	446	162560227	162561308	1082	2	ENSG00000259788	ENST00000563991	6536	NA	NA	NA
1	167517395	167517977	583	*	Promoter (<=1kb)	446	167430640	167518529	87890	2	ENSG00000198821	ENST00000362089	552	919	CD247	CD247 molecule
1	170461157	170461836	680	*	Exon (ENST00000416416/ENSG00000231407, exon 2 of 2)	446	170461317	170494540	33224	2	ENSG00000231407	ENST00000446102	32704	NA	NA	NA
1	176865887	176866463	577	*	Intron (ENST00000367657/ENSG00000152092, intron 22 of 22)	446	176829128	176831841	2714	2	ENSG00000286754	ENST00000662545	-34046	NA	NA	NA
1	177926599	177927523	925	*	Promoter (<=1kb)	446	177923956	177928485	4530	2	ENSG00000120341	ENST00000441371	962	89866	SEC16B	SEC16 homolog B, endoplasmic reticulum export factor
1	179937793	179938264	472	*	Intron (ENST00000567486/ENSG00000261831, intron 1 of 2)	446	179926641	179941796	15156	2	ENSG00000261831	ENST00000567486	3532	NA	NA	NA
1	180166891	180168566	1676	*	Intron (ENST00000367602/ENSG00000116260, intron 2 of 11)	446	180154897	180198034	43138	1	ENSG00000116260	ENST00000367600	11994	5768	QSOX1	quiescin sulfhydryl oxidase 1
1	182625989	182626447	459	*	Distal Intergenic	446	182615254	182616629	1376	1	ENSG00000261504	ENST00000566297	10735	284648	LINC01686	long intergenic non-protein coding RNA 1686
1	183191791	183192236	446	*	Intron (ENST00000493293/ENSG00000058085, intron 1 of 21)	446	183186264	183245127	58864	1	ENSG00000058085	ENST00000264144	5527	3918	LAMC2	laminin subunit gamma 2
1	184792340	184793034	695	*	3' UTR	446	184790724	184805985	15262	2	ENSG00000135842	ENST00000417056	12951	116496	NIBAN1	niban apoptosis regulator 1
1	201748302	201748836	535	*	Intron (ENST00000367302/ENSG00000134369, intron 5 of 29)	446	201739868	201826969	87102	1	ENSG00000134369	ENST00000367295	8434	89796	NAV1	neuron navigator 1
1	201791845	201792416	572	*	3' UTR	446	201786550	201803706	17157	1	ENSG00000134369	ENST00000477118	5295	89796	NAV1	neuron navigator 1
1	201849756	201850428	673	*	Promoter (2-3kb)	446	201847295	201850816	3522	1	ENSG00000198700	ENST00000479374	2461	55705	IPO9	importin 9
1	203038114	203038793	680	*	5' UTR	446	203034484	203078740	44257	1	ENSG00000143847	ENST00000447715	3630	8497	PPFIA4	PTPRF interacting protein alpha 4
1	204726488	204726887	400	*	Promoter (1-2kb)	446	204727991	204728106	116	1	ENSG00000251861	ENST00000516052	-1104	NA	NA	NA
1	207944520	207944961	442	*	Distal Intergenic	446	207959292	207969329	10038	1	ENSG00000284237	ENST00000638446	-14331	NA	NA	NA
1	217660235	217661066	832	*	Intron (ENST00000470448/ENSG00000162814, intron 3 of 7)	446	217631344	217871696	240353	1	ENSG00000162814	ENST00000366933	28891	128153	SPATA17	spermatogenesis associated 17
1	217721666	217722107	442	*	Intron (ENST00000470448/ENSG00000162814, intron 6 of 7)	446	217737844	217801768	63925	1	ENSG00000162814	ENST00000492747	-15737	128153	SPATA17	spermatogenesis associated 17
1	220343652	220344038	387	*	Distal Intergenic	446	220359731	220360183	453	2	ENSG00000226927	ENST00000413159	16145	NA	NA	NA
1	220487308	220487837	530	*	Promoter (<=1kb)	446	220485104	220487558	2455	2	ENSG00000231529	ENST00000446169	0	NA	NA	NA
1	220961999	220962644	646	*	Distal Intergenic	446	220881069	220884493	3425	1	ENSG00000136630	ENST00000427693	80930	3142	HLX	H2.0 like homeobox
1	221040765	221041306	542	*	Distal Intergenic	446	221133865	221134221	357	2	ENSG00000226211	ENST00000448432	92915	NA	NA	NA
1	224637449	224637968	520	*	Intron (ENST00000498382/ENSG00000143786, intron 1 of 5)	446	224616317	224740554	124238	1	ENSG00000143786	ENST00000272133	21132	149111	CNIH3	cornichon family AMPA receptor auxiliary protein 3
1	226436668	226437386	719	*	Promoter (1-2kb)	446	226438564	226439344	781	1	ENSG00000229965	ENST00000411586	-1178	NA	NA	NA
1	226821256	226821851	596	*	Distal Intergenic	446	226827711	226833906	6196	1	ENSG00000287259	ENST00000664298	-5860	NA	NA	NA
1	231106289	231106884	596	*	Distal Intergenic	446	231117831	231118325	495	2	ENSG00000229595	ENST00000435008	11441	NA	NA	NA
1	235532368	235533216	849	*	Distal Intergenic	446	235537520	235538041	522	1	ENSG00000235638	ENST00000433044	-4304	NA	NA	NA
2	8148215	8148710	496	*	Intron (ENST00000663636/ENSG00000235665, intron 1 of 5)	447	8139402	8143269	3868	1	ENSG00000229740	ENST00000442864	8813	NA	NA	NA
2	12343155	12343670	516	*	Intron (ENST00000412294/ENSG00000224184, intron 4 of 5)	447	12314321	12562617	248297	1	ENSG00000224184	ENST00000412606	28834	100506457	MIR3681HG	MIR3681 host gene
2	18834202	18834843	642	*	Distal Intergenic	447	18784807	18787752	2946	1	ENSG00000224626	ENST00000431697	49395	NA	NA	NA
2	39631665	39632224	560	*	Intron (ENST00000415640/ENSG00000231312, intron 1 of 2)	447	39664982	39707136	42155	1	ENSG00000152154	ENST00000437068	-32758	130733	TMEM178A	transmembrane protein 178A
2	55165564	55166013	450	*	Distal Intergenic	447	55175861	55209652	33792	2	ENSG00000162994	ENST00000411884	43639	130162	CLHC1	clathrin heavy chain linker domain containing 1
2	61750509	61751078	570	*	Distal Intergenic	447	61710076	61710978	903	2	ENSG00000213486	ENST00000456719	-39531	NA	NA	NA
2	65819135	65819703	569	*	Intron (ENST00000606978/ENSG00000204929, intron 6 of 9)	447	65790039	65793533	3495	1	ENSG00000280257	ENST00000623818	29096	NA	NA	NA
2	67954140	67954781	642	*	Distal Intergenic	447	68023694	68024766	1073	2	ENSG00000235968	ENST00000454972	69985	NA	NA	NA
2	70596174	70597214	1041	*	Distal Intergenic	447	70629657	70648761	19105	1	ENSG00000286979	ENST00000663725	-32443	NA	NA	NA
2	71498242	71498719	478	*	Intron (ENST00000409582/ENSG00000135636, intron 3 of 55)	447	71466702	71686648	219947	1	ENSG00000135636	ENST00000410041	31540	8291	DYSF	dysferlin
2	73089523	73090047	525	*	Promoter (<=1kb)	447	73073384	73089655	16272	2	ENSG00000135631	ENST00000493523	0	26056	RAB11FIP5	RAB11 family interacting protein 5
2	84945879	84946997	1119	*	Intron (ENST00000671359/ENSG00000287625, intron 2 of 3)	447	84926143	84963249	37107	1	ENSG00000287625	ENST00000661374	19736	NA	NA	NA
2	95760836	95761627	792	*	Distal Intergenic	447	95789654	95797846	8193	1	ENSG00000237510	ENST00000471661	-28027	NA	NA	NA
2	96427840	96428386	547	*	Distal Intergenic	447	96364480	96373583	9104	1	ENSG00000121152	ENST00000435349	63360	23397	NCAPH	non-SMC condensin I complex subunit H
2	96916680	96917614	935	*	Exon (ENST00000661235/ENSG00000286654, exon 2 of 2)	447	96912571	96914775	2205	1	ENSG00000286654	ENST00000670174	4109	NA	NA	NA
2	109209434	109209786	353	*	Intron (ENST00000309415/ENSG00000172985, intron 1 of 9)	447	109251422	109251646	225	1	ENSG00000228551	ENST00000456025	-41636	NA	NA	NA
2	111983976	111984648	673	*	Intron (ENST00000295408/ENSG00000153208, intron 8 of 18)	447	111997370	112003443	6074	1	ENSG00000153208	ENST00000473065	-12722	10461	MERTK	MER proto-oncogene, tyrosine kinase
2	115624314	115624717	404	*	Intron (ENST00000410059/ENSG00000175497, intron 5 of 25)	447	115468056	115468938	883	1	ENSG00000230391	ENST00000446095	156258	NA	NA	NA
2	118049348	118049991	644	*	Intron (ENST00000627670/ENSG00000235066, intron 5 of 5)	447	118031840	118055033	23194	1	ENSG00000235066	ENST00000627626	17508	NA	NA	NA
2	128260589	128261168	580	*	Intron (ENST00000469019/ENSG00000136720, intron 1 of 2)	447	128268690	128290196	21507	2	ENSG00000136720	ENST00000463963	29028	9394	HS6ST1	heparan sulfate 6-O-sulfotransferase 1
2	133586996	133587426	431	*	Distal Intergenic	447	133596091	133596399	309	1	ENSG00000200708	ENST00000363838	-8665	NA	NA	NA
2	134819308	134819815	508	*	Promoter (2-3kb)	447	134816362	134816589	228	1	ENSG00000228098	ENST00000416042	2946	NA	NA	NA
2	142531266	142531802	537	*	Distal Intergenic	447	142543418	142543975	558	1	ENSG00000228134	ENST00000415815	-11616	NA	NA	NA
2	146370714	146371219	506	*	Distal Intergenic	447	146477427	146478113	687	1	ENSG00000227134	ENST00000424233	-106208	NA	NA	NA
2	150663093	150663595	503	*	Distal Intergenic	447	150631181	150634787	3607	1	ENSG00000224048	ENST00000653799	31912	101929282	LINC02612	long intergenic non-protein coding RNA 2612
2	169184033	169184605	573	*	Promoter (1-2kb)	447	169177840	169182450	4611	2	ENSG00000081479	ENST00000461418	-1583	4036	LRP2	LDL receptor related protein 2
2	172829072	172829660	589	*	Intron (ENST00000484331/ENSG00000091428, intron 4 of 4)	447	172821575	173052893	231319	1	ENSG00000091428	ENST00000397087	7497	11069	RAPGEF4	Rap guanine nucleotide exchange factor 4
2	181949060	181949551	492	*	Distal Intergenic	447	181954241	182117518	163278	1	ENSG00000150722	ENST00000495820	-4690	151242	PPP1R1C	protein phosphatase 1 regulatory inhibitor subunit 1C
2	186919218	186919643	426	*	Distal Intergenic	447	186844753	186849208	4456	2	ENSG00000163012	ENST00000419862	-70010	151112	ZSWIM2	zinc finger SWIM-type containing 2
2	200628441	200629007	567	*	Intron (ENST00000374700/ENSG00000138356, intron 20 of 34)	447	200638132	200642803	4672	1	ENSG00000138356	ENST00000472553	-9125	316	AOX1	aldehyde oxidase 1
2	207394382	207395782	1401	*	Intron (ENST00000412387/ENSG00000223725, intron 3 of 4)	447	207269275	207269424	150	2	ENSG00000221628	ENST00000408701	-124958	100302130	MIR1302-4	microRNA 1302-4
2	207487754	207488341	588	*	Intron (ENST00000412387/ENSG00000223725, intron 3 of 4)	447	207529737	207597789	68053	1	ENSG00000118260	ENST00000430624	-41396	1385	CREB1	cAMP responsive element binding protein 1
2	214577722	214578228	507	*	3' UTR	447	214510196	214536890	26695	1	ENSG00000224257	ENST00000416430	67526	100885780	VWC2L-IT1	VWC2L intronic transcript 1
2	215843352	215844046	695	*	Promoter (<=1kb)	447	215611563	215843536	231974	2	ENSG00000235770	ENST00000445174	0	646324	LINC00607	long intergenic non-protein coding RNA 607
2	217451457	217452301	845	*	Intron (ENST00000474063/ENSG00000231672, intron 2 of 11)	447	217425510	217434216	8707	2	ENSG00000231672	ENST00000484635	-17241	NA	NA	NA
2	219298705	219299234	530	*	Promoter (<=1kb)	447	219299002	219304130	5129	1	ENSG00000230432	ENST00000417355	0	NA	NA	NA
2	220187911	220188579	669	*	Intron (ENST00000432993/ENSG00000239498, intron 1 of 3)	447	220127546	220212491	84946	1	ENSG00000235337	ENST00000438633	60365	NA	NA	NA
2	222813243	222813930	688	*	Distal Intergenic	447	222860942	222942222	81281	1	ENSG00000123983	ENST00000392066	-47012	2181	ACSL3	acyl-CoA synthetase long chain family member 3
2	226903152	226903624	473	*	Intron (ENST00000341329/ENSG00000144468, intron 3 of 6)	447	226906712	226988498	81787	1	ENSG00000144468	ENST00000409053	-3088	84236	RHBDD1	rhomboid domain containing 1
2	234111335	234112040	706	*	Promoter (2-3kb)	447	234109081	234109481	401	1	ENSG00000226442	ENST00000437967	2254	NA	NA	NA
3	1251609	1252093	485	*	Intron (ENST00000397479/ENSG00000134115, intron 3 of 21)	448	1394173	1394448	276	2	ENSG00000232563	ENST00000449338	142355	NA	NA	NA
3	8509942	8510351	410	*	Intron (ENST00000426878/ENSG00000071282, intron 1 of 4)	448	8501888	8567764	65877	1	ENSG00000071282	ENST00000456506	8054	29995	LMCD1	LIM and cysteine rich domains 1
3	23728567	23729228	662	*	Distal Intergenic	448	23805955	23807888	1934	1	ENSG00000170142	ENST00000484048	-76727	7324	UBE2E1	ubiquitin conjugating enzyme E2 E1
3	24254484	24255141	658	*	Intron (ENST00000396671/ENSG00000151090, intron 2 of 9)	448	24122838	24165595	42758	2	ENSG00000151090	ENST00000280696	-88889	7068	THRB	thyroid hormone receptor beta
3	24524299	24524758	460	*	Promoter (2-3kb)	448	24521362	24521435	74	2	ENSG00000265028	ENST00000580344	-2864	NA	NA	NA
3	25523059	25523673	615	*	Intron (ENST00000383772/ENSG00000077092, intron 3 of 7)	448	25555543	25555606	64	2	ENSG00000272166	ENST00000607246	31933	NA	NA	NA
3	36219322	36220004	683	*	Distal Intergenic	448	36169767	36170448	682	2	ENSG00000236158	ENST00000454568	-48874	NA	NA	NA
3	57298022	57298452	431	*	Promoter (<=1kb)	448	57293700	57297308	3609	2	ENSG00000174844	ENST00000462713	-714	201625	DNAH12	dynein axonemal heavy chain 12
3	59573886	59574277	392	*	Intron (ENST00000668131/ENSG00000243295, intron 5 of 6)	448	59584169	59584445	277	1	ENSG00000277592	ENST00000611926	-9892	NA	NA	NA
3	65170518	65171124	607	*	Distal Intergenic	448	65174916	65193509	18594	1	ENSG00000243149	ENST00000667847	-3792	NA	NA	NA
3	65230260	65230806	547	*	Distal Intergenic	448	65174958	65193499	18542	1	ENSG00000243149	ENST00000481004	55302	NA	NA	NA
3	71989107	71989606	500	*	Intron (ENST00000666244/ENSG00000241163, intron 5 of 6)	448	72006774	72006975	202	1	ENSG00000244130	ENST00000490086	-17168	NA	NA	NA
3	94935975	94936762	788	*	Promoter (<=1kb)	448	94935760	94936120	361	2	ENSG00000242911	ENST00000489238	0	NA	NA	NA
3	107124767	107125298	532	*	Intron (ENST00000660862/ENSG00000242759, intron 2 of 9)	448	107109761	107121308	11548	2	ENSG00000242759	ENST00000654920	-3459	NA	NA	NA
3	108917464	108918035	572	*	Intron (ENST00000393963/ENSG00000138472, intron 2 of 3)	448	108907792	108953762	45971	2	ENSG00000138472	ENST00000393963	35727	9626	GUCA1C	guanylate cyclase activator 1C
3	122952434	122952932	499	*	Intron (ENST00000357599/ENSG00000082684, intron 2 of 22)	448	122948582	122975370	26789	2	ENSG00000082684	ENST00000449546	22438	54437	SEMA5B	semaphorin 5B
3	122969719	122970564	846	*	Intron (ENST00000357599/ENSG00000082684, intron 1 of 22)	448	122948582	122975370	26789	2	ENSG00000082684	ENST00000449546	4806	54437	SEMA5B	semaphorin 5B
3	122977690	122978494	805	*	Promoter (1-2kb)	448	122943496	122976134	32639	2	ENSG00000082684	ENST00000465147	-1556	54437	SEMA5B	semaphorin 5B
3	129586664	129588186	1523	*	Promoter (<=1kb)	448	129583631	129586685	3055	2	ENSG00000004399	ENST00000505665	0	23129	PLXND1	plexin D1
3	149224641	149225747	1107	*	Promoter (<=1kb)	448	149224138	149226334	2197	1	ENSG00000286714	ENST00000663884	503	NA	NA	NA
3	157475898	157476482	585	*	Intron (ENST00000392833/ENSG00000197415, intron 2 of 12)	448	157459622	157470529	10908	2	ENSG00000197415	ENST00000490235	-5369	79674	VEPH1	ventricular zone expressed PH domain containing 1
3	179852055	179852559	505	*	Intron (ENST00000392649/ENSG00000114757, intron 5 of 11)	448	179875376	179881609	6234	1	ENSG00000243799	ENST00000466064	-22817	NA	NA	NA
3	183454956	183455598	643	*	Promoter (<=1kb)	448	183454128	183454262	135	1	ENSG00000251730	ENST00000515921	828	NA	NA	NA
4	37693395	37693822	428	*	Distal Intergenic	449	37699895	37700002	108	2	ENSG00000207075	ENST00000384347	6180	NA	NA	NA
4	42927910	42928540	631	*	Intron (ENST00000399770/ENSG00000215203, intron 1 of 3)	449	42892713	43030658	137946	1	ENSG00000215203	ENST00000399770	35197	389207	GRXCR1	glutaredoxin and cysteine rich domain containing 1
4	47213904	47214466	563	*	Intron (ENST00000295454/ENSG00000163288, intron 4 of 8)	449	47031633	47403385	371753	1	ENSG00000163288	ENST00000510909	182271	2560	GABRB1	gamma-aminobutyric acid type A receptor beta1 subunit
4	71126724	71127322	599	*	Intron (ENST00000649996/ENSG00000080493, intron 2 of 26)	449	71187259	71572083	384825	1	ENSG00000080493	ENST00000264485	-59937	8671	SLC4A4	solute carrier family 4 member 4
4	77481747	77482533	787	*	Intron (ENST00000513871/ENSG00000249036, intron 1 of 2)	449	77394491	77494286	99796	2	ENSG00000249036	ENST00000513871	11753	NA	NA	NA
4	80237987	80238362	376	*	Distal Intergenic	449	80266599	80290194	23596	1	ENSG00000138675	ENST00000312465	-28237	2250	FGF5	fibroblast growth factor 5
4	109921304	109921761	458	*	Intron (ENST00000265171/ENSG00000138798, intron 1 of 23)	449	109913241	110011501	98261	1	ENSG00000138798	ENST00000503392	8063	1950	EGF	epidermal growth factor
4	113474005	113474487	483	*	Intron (ENST00000394524/ENSG00000145349, intron 14 of 17)	449	113452961	113513842	60882	2	ENSG00000145349	ENST00000513132	39355	817	CAMK2D	calcium/calmodulin dependent protein kinase II delta
4	121053730	121054148	419	*	Intron (ENST00000379692/ENSG00000173376, intron 1 of 3)	449	121061172	121061478	307	2	ENSG00000223006	ENST00000411074	7330	NA	NA	NA
4	131635170	131635676	507	*	Distal Intergenic	449	131720260	131720543	284	2	ENSG00000241392	ENST00000490174	84867	NA	NA	NA
4	140856664	140857493	830	*	Downstream (2-3kb)	449	140779039	140779141	103	2	ENSG00000222613	ENST00000410681	-77523	NA	NA	NA
4	141046194	141046738	545	*	Intron (ENST00000515673/ENSG00000170153, intron 1 of 6)	449	140944549	140967870	23322	2	ENSG00000170153	ENST00000515057	-78324	57484	RNF150	ring finger protein 150
4	154124537	154125230	694	*	Intron (ENST00000660197/ENSG00000280241, intron 2 of 4)	449	154142122	154298819	156698	1	ENSG00000280241	ENST00000624941	-16892	NA	NA	NA
4	183828124	183828441	318	*	Intron (ENST00000513034/ENSG00000173320, intron 1 of 2)	449	183853431	184001407	147977	1	ENSG00000173320	ENST00000511250	-24990	56977	STOX2	storkhead box 2
5	47270	47807	538	*	Distal Intergenic	450	58198	58915	718	1	ENSG00000250020	ENST00000506872	-10391	NA	NA	NA
5	458700	459378	679	*	Promoter (1-2kb)	450	457006	459580	2575	1	ENSG00000180104	ENST00000510028	1694	11336	EXOC3	exocyst complex component 3
5	1548174	1548532	359	*	Exon (ENST00000503113/ENSG00000251532, exon 2 of 4)	450	1544107	1551710	7604	2	ENSG00000251532	ENST00000503113	3178	NA	NA	NA
5	1563858	1564471	614	*	Distal Intergenic	450	1544107	1551710	7604	2	ENSG00000251532	ENST00000503113	-12148	NA	NA	NA
5	1568187	1569074	888	*	Exon (ENST00000652578/ENSG00000185986, exon 9 of 9)	450	1544107	1551710	7604	2	ENSG00000251532	ENST00000503113	-16477	NA	NA	NA
5	4584957	4585507	551	*	Intron (ENST00000507435/ENSG00000248973, intron 3 of 5)	450	4640731	4648254	7524	1	ENSG00000251371	ENST00000513925	-55224	NA	NA	NA
5	4802038	4802451	414	*	Exon (ENST00000651493/ENSG00000248973, exon 5 of 5)	450	4775476	4805769	30294	2	ENSG00000248311	ENST00000506059	3318	NA	NA	NA
5	6454641	6455245	605	*	Intron (ENST00000399816/ENSG00000215218, intron 1 of 1)	450	6448859	6496723	47865	1	ENSG00000215218	ENST00000399816	5782	134111	UBE2QL1	ubiquitin conjugating enzyme E2 Q family like 1
5	13632619	13633120	502	*	Distal Intergenic	450	13637919	13638381	463	2	ENSG00000243744	ENST00000473590	5261	NA	NA	NA
5	17096804	17097511	708	*	Intron (ENST00000606445/ENSG00000176788, intron 2 of 3)	450	17107360	17107789	430	2	ENSG00000271892	ENST00000606282	10278	NA	NA	NA
5	23223848	23224397	550	*	Distal Intergenic	450	23262159	23263185	1027	2	ENSG00000250319	ENST00000509054	38788	NA	NA	NA
5	26579594	26580144	551	*	Distal Intergenic	450	26669346	26669736	391	1	ENSG00000230571	ENST00000413321	-89202	NA	NA	NA
5	27830431	27830910	480	*	Distal Intergenic	450	27493359	27496404	3046	1	ENSG00000250337	ENST00000671061	337072	643401	PURPL	p53 upregulated regulator of p53 levels
5	30179865	30180503	639	*	Distal Intergenic	450	30248350	30248893	544	1	ENSG00000250587	ENST00000505250	-67847	NA	NA	NA
5	33367423	33367832	410	*	Promoter (<=1kb)	450	33367179	33368778	1600	2	ENSG00000288579	ENST00000673986	946	NA	NA	NA
5	43416091	43416814	724	*	Distal Intergenic	450	43379193	43412391	33199	2	ENSG00000151882	ENST00000361115	-3700	56477	CCL28	C-C motif chemokine ligand 28
5	74105098	74105663	566	*	Promoter (1-2kb)	450	74084068	74103216	19149	2	ENSG00000248474	ENST00000511395	-1882	NA	NA	NA
5	80990493	80991385	893	*	Intron (ENST00000265080/ENSG00000113319, intron 1 of 26)	450	80997183	80998047	865	2	ENSG00000251001	ENST00000506228	6662	NA	NA	NA
5	82365618	82366223	606	*	Intron (ENST00000508366/ENSG00000205464, intron 6 of 7)	450	82382945	82386516	3572	1	ENSG00000205464	ENST00000502523	-16722	92270	ATP6AP1L	ATPase H+ transporting accessory protein 1 like
5	98414937	98415765	829	*	Distal Intergenic	450	98410235	98411792	1558	2	ENSG00000249448	ENST00000515438	-3145	NA	NA	NA
5	100797774	100798417	644	*	Distal Intergenic	450	100816482	100816565	84	2	ENSG00000221263	ENST00000408336	18148	100302288	MIR548P	microRNA 548p
5	103676134	103676715	582	*	Distal Intergenic	450	103559405	103562790	3386	2	ENSG00000112874	ENST00000508889	-113344	83594	NUDT12	nudix hydrolase 12
5	116763886	116764398	513	*	Promoter (1-2kb)	450	116742991	116762209	19219	2	ENSG00000251311	ENST00000504419	-1677	NA	NA	NA
5	126884263	126884827	565	*	Intron (ENST00000308660/ENSG00000173926, intron 3 of 4)	450	126870191	126878397	8207	2	ENSG00000173926	ENST00000506088	-5866	115123	MARCHF3	membrane associated ring-CH-type finger 3
5	127887133	127887602	470	*	Intron (ENST00000514853/ENSG00000230561, intron 6 of 6)	450	127838486	127857804	19319	2	ENSG00000250603	ENST00000507509	-29329	NA	NA	NA
5	130710391	130710993	603	*	Intron (ENST00000661392/ENSG00000287390, intron 4 of 5)	450	130598348	130598779	432	1	ENSG00000249418	ENST00000511094	112043	NA	NA	NA
5	132002043	132002611	569	*	Promoter (<=1kb)	450	131989450	132001881	12432	2	ENSG00000164398	ENST00000416557	-162	23305	ACSL6	acyl-CoA synthetase long chain family member 6
5	132263781	132264307	527	*	Promoter (2-3kb)	450	132261449	132271336	9888	1	ENSG00000131435	ENST00000418373	2332	8572	PDLIM4	PDZ and LIM domain 4
5	132674633	132675105	473	*	Promoter (<=1kb)	450	132674358	132679869	5512	1	ENSG00000113520	ENST00000495905	275	3565	IL4	interleukin 4
5	137035405	137035969	565	*	Intron (ENST00000394945/ENSG00000152377, intron 6 of 10)	450	136988553	136993160	4608	2	ENSG00000152377	ENST00000508642	-42245	6695	SPOCK1	SPARC (osteonectin), cwcv and kazal like domains proteoglycan 1
5	140317818	140318217	400	*	Distal Intergenic	450	140245125	140303113	57989	2	ENSG00000113068	ENST00000510217	-14705	5201	PFDN1	prefoldin subunit 1
5	141747016	141747629	614	*	Intron (ENST00000653358/ENSG00000286736, intron 1 of 1)	450	141718711	141775187	56477	2	ENSG00000286736	ENST00000653358	27558	NA	NA	NA
5	142472259	142472744	486	*	Intron (ENST00000668207/ENSG00000231185, intron 3 of 4)	450	142404218	142530130	125913	1	ENSG00000231185	ENST00000425963	68041	101926941	SPRY4-AS1	SPRY4 antisense RNA 1
5	145484122	145484627	506	*	Intron (ENST00000510259/ENSG00000186314, intron 1 of 2)	450	145429903	145451099	21197	1	ENSG00000248125	ENST00000513657	54219	NA	NA	NA
5	145848810	145849337	528	*	Distal Intergenic	450	145819688	145835369	15682	2	ENSG00000186314	ENST00000515475	-13441	153768	PRELID2	PRELI domain containing 2
5	145960930	145961582	653	*	Intron (ENST00000359120/ENSG00000156463, intron 2 of 9)	450	145937877	146081791	143915	1	ENSG00000156463	ENST00000511217	23053	153769	SH3RF2	SH3 domain containing ring finger 2
5	152092535	152092942	408	*	Intron (ENST00000524295/ENSG00000254226, intron 3 of 6)	450	152194423	152270412	75990	1	ENSG00000254226	ENST00000670537	-101481	101927115	LINC01933	long intergenic non-protein coding RNA 1933
5	157516100	157516444	345	*	Intron (ENST00000517951/ENSG00000135074, intron 7 of 22)	450	157477304	157502822	25519	2	ENSG00000135074	ENST00000517374	-13278	8728	ADAM19	ADAM metallopeptidase domain 19
5	159330154	159330507	354	*	Promoter (<=1kb)	450	159314780	159330487	15708	2	ENSG00000113302	ENST00000231228	0	3593	IL12B	interleukin 12B
5	167759291	167759891	601	*	Intron (ENST00000518659/ENSG00000145934, intron 2 of 28)	450	167755003	168263185	508183	1	ENSG00000145934	ENST00000520394	4288	57451	TENM2	teneurin transmembrane protein 2
5	167773597	167774137	541	*	Intron (ENST00000518659/ENSG00000145934, intron 2 of 28)	450	167755003	168263185	508183	1	ENSG00000145934	ENST00000520394	18594	57451	TENM2	teneurin transmembrane protein 2
5	168765593	168766210	618	*	Promoter (2-3kb)	450	168768146	168768255	110	2	ENSG00000207739	ENST00000385006	2045	407001	MIR218-2	microRNA 218-2
5	168908197	168908641	445	*	Intron (ENST00000519560/ENSG00000184347, intron 4 of 35)	450	168661733	168883338	221606	2	ENSG00000184347	ENST00000404867	-24859	6586	SLIT3	slit guidance ligand 3
5	168931482	168932171	690	*	Intron (ENST00000519560/ENSG00000184347, intron 4 of 35)	450	168661733	168883338	221606	2	ENSG00000184347	ENST00000404867	-48144	6586	SLIT3	slit guidance ligand 3
5	168977894	168978563	670	*	Intron (ENST00000519560/ENSG00000184347, intron 4 of 35)	450	168993000	168995677	2678	1	ENSG00000248965	ENST00000514811	-14437	NA	NA	NA
5	170614732	170615697	966	*	Intron (ENST00000377360/ENSG00000182132, intron 1 of 7)	450	170680953	170736604	55652	1	ENSG00000182132	ENST00000636734	-65256	30820	KCNIP1	potassium voltage-gated channel interacting protein 1
5	172102700	172103408	709	*	Intron (ENST00000176763/ENSG00000072786, intron 7 of 18)	450	172105571	172106798	1228	2	ENSG00000072786	ENST00000517527	3390	6793	STK10	serine/threonine kinase 10
5	172647983	172648380	398	*	Intron (ENST00000369800/ENSG00000214357, intron 1 of 4)	450	172641266	172686925	45660	1	ENSG00000214357	ENST00000522853	6717	54492	NEURL1B	neuralized E3 ubiquitin protein ligase 1B
5	176615080	176615417	338	*	Distal Intergenic	450	176595802	176610156	14355	2	ENSG00000169258	ENST00000303991	-4924	114787	GPRIN1	G protein regulated inducer of neurite outgrowth 1
6	753371	753885	515	*	Intron (ENST00000658207/ENSG00000271727, intron 4 of 4)	451	729128	760936	31809	2	ENSG00000287293	ENST00000655063	7051	NA	NA	NA
6	3282170	3282644	475	*	Promoter (1-2kb)	451	3273356	3284120	10765	2	ENSG00000137266	ENST00000482874	1476	63027	SLC22A23	solute carrier family 22 member 23
6	5082475	5083116	642	*	Promoter (2-3kb)	451	5085341	5089487	4147	1	ENSG00000219607	ENST00000405617	-2225	648791	PPP1R3G	protein phosphatase 1 regulatory subunit 3G
6	13480664	13481221	558	*	Intron (ENST00000379287/ENSG00000145990, intron 1 of 1)	451	13363355	13486183	122829	2	ENSG00000145990	ENST00000612338	4962	54438	GFOD1	glucose-fructose oxidoreductase domain containing 1
6	33894391	33894827	437	*	Promoter (<=1kb)	451	33867506	33893653	26148	2	ENSG00000249346	ENST00000525912	-738	100507584	LINC01016	long intergenic non-protein coding RNA 1016
6	34059310	34059781	472	*	Promoter (2-3kb)	451	34040711	34056323	15613	2	ENSG00000124493	ENST00000609915	-2987	2914	GRM4	glutamate metabotropic receptor 4
6	43667220	43668849	1630	*	Intron (ENST00000372163/ENSG00000172426, intron 4 of 4)	451	43671202	43687791	16590	2	ENSG00000096080	ENST00000372133	18942	55168	MRPS18A	mitochondrial ribosomal protein S18A
6	43923351	43923998	648	*	Distal Intergenic	451	43851757	43852333	577	2	ENSG00000223469	ENST00000451910	-71018	NA	NA	NA
6	44074336	44075852	1517	*	Promoter (<=1kb)	451	43995723	44074652	78930	2	ENSG00000237686	ENST00000422059	0	101929705	LOC101929705	uncharacterized LOC101929705
6	54282019	54282671	653	*	Distal Intergenic	451	54307859	54326840	18982	1	ENSG00000137251	ENST00000486436	-25188	27283	TINAG	tubulointerstitial nephritis antigen
6	114633998	114634461	464	*	Distal Intergenic	451	114523443	114545335	21893	2	ENSG00000226079	ENST00000652989	-88663	105377959	LOC105377959	uncharacterized LOC105377959
6	116215352	116215870	519	*	Intron (ENST00000319550/ENSG00000178425, intron 6 of 11)	451	116244187	116244728	542	2	ENSG00000236326	ENST00000457319	28858	NA	NA	NA
6	138465005	138465589	585	*	Promoter (<=1kb)	451	138464099	138464383	285	1	ENSG00000274594	ENST00000619829	906	NA	NA	NA
6	159578671	159579153	483	*	Intron (ENST00000656085/ENSG00000286533, intron 1 of 1)	451	159586955	159589169	2215	2	ENSG00000237927	ENST00000430078	10016	NA	NA	NA
7	1124846	1125339	494	*	Promoter (2-3kb)	452	997494	1127388	129895	2	ENSG00000146540	ENST00000488073	2049	84310	C7orf50	chromosome 7 open reading frame 50
7	2224735	2225569	835	*	Promoter (<=1kb)	452	2215957	2225598	9642	2	ENSG00000002822	ENST00000429625	29	8379	MAD1L1	mitotic arrest deficient 1 like 1
7	18109769	18110250	482	*	Intron (ENST00000417496/ENSG00000048052, intron 1 of 12)	452	18127220	18127309	90	2	ENSG00000221393	ENST00000408466	17059	100302140	MIR1302-6	microRNA 1302-6
7	27277529	27278032	504	*	Distal Intergenic	452	27269357	27269678	322	2	ENSG00000213783	ENST00000446039	-7851	NA	NA	NA
7	28804969	28805457	489	*	Intron (ENST00000396299/ENSG00000146592, intron 7 of 9)	452	28809409	28819559	10151	1	ENSG00000146592	ENST00000498316	-3952	9586	CREB5	cAMP responsive element binding protein 5
7	29304705	29305245	541	*	Intron (ENST00000644824/ENSG00000285162, intron 5 of 16)	452	29288881	29400781	111901	1	ENSG00000106069	ENST00000409922	15824	1124	CHN2	chimerin 2
7	30717060	30717677	618	*	Intron (ENST00000484180/ENSG00000241644, intron 1 of 3)	452	30686408	30700129	13722	2	ENSG00000106113	ENST00000462882	-16931	1395	CRHR2	corticotropin releasing hormone receptor 2
7	30799450	30800112	663	*	Intron (ENST00000458257/ENSG00000254959, intron 7 of 19)	452	30796691	30803410	6720	2	ENSG00000229263	ENST00000440376	3298	NA	NA	NA
7	34672447	34672877	431	*	Intron (ENST00000360581/ENSG00000187258, intron 1 of 8)	452	34658409	34849668	191260	1	ENSG00000187258	ENST00000381539	14038	387129	NPSR1	neuropeptide S receptor 1
7	39605039	39605740	702	*	Intron (ENST00000432096/ENSG00000241127, intron 2 of 2)	452	39609717	39610280	564	1	ENSG00000106540	ENST00000446267	-3977	NA	NA	NA
7	41572896	41573607	712	*	Distal Intergenic	452	41689516	41692564	3049	2	ENSG00000122641	ENST00000464515	118957	3624	INHBA	inhibin subunit beta A
7	46784689	46785139	451	*	Promoter (1-2kb)	452	46782800	46783135	336	1	ENSG00000242948	ENST00000448836	1889	NA	NA	NA
7	51034238	51035101	864	*	Promoter (<=1kb)	452	51017280	51035955	18676	2	ENSG00000106078	ENST00000462395	854	23242	COBL	cordon-bleu WH2 repeat protein
7	55185946	55186631	686	*	Promoter (2-3kb)	452	55179750	55188934	9185	2	ENSG00000224057	ENST00000442411	2303	100507500	EGFR-AS1	EGFR antisense RNA 1
7	66635902	66636432	531	*	Promoter (2-3kb)	452	66638856	66642763	3908	1	ENSG00000243335	ENST00000640601	-2424	154881	KCTD7	potassium channel tetramerization domain containing 7
7	67937721	67938235	515	*	Distal Intergenic	452	68020235	68036917	16683	1	ENSG00000225209	ENST00000659217	-82000	102723427	LOC102723427	uncharacterized LOC102723427
7	69367647	69368162	516	*	Intron (ENST00000435148/ENSG00000225718, intron 1 of 2)	452	69387756	69393844	6089	2	ENSG00000225718	ENST00000662641	25682	NA	NA	NA
7	70598989	70599505	517	*	Promoter (2-3kb)	452	70596085	70792485	196401	1	ENSG00000158321	ENST00000644506	2904	26053	AUTS2	activator of transcription and developmental regulator AUTS2
7	96954103	96954471	369	*	Downstream (<1kb)	452	96965302	96965481	180	1	ENSG00000274409	ENST00000621599	-10831	NA	NA	NA
7	116653169	116653606	438	*	Intron (ENST00000650435/ENSG00000231210, intron 2 of 5)	452	116563594	116663829	100236	2	ENSG00000231210	ENST00000650435	10223	NA	NA	NA
7	116836827	116837339	513	*	Intron (ENST00000464223/ENSG00000198898, intron 1 of 3)	452	116862530	116904336	41807	1	ENSG00000198898	ENST00000414148	-25191	830	CAPZA2	capping actin protein of muscle Z-line subunit alpha 2
7	130144352	130145202	851	*	Promoter (2-3kb)	452	130141738	130142615	878	1	ENSG00000229196	ENST00000470348	2614	100128325	LOC100128325	uncharacterized LOC100128325
7	130180598	130181128	531	*	Promoter (<=1kb)	452	130178459	130182057	3599	2	ENSG00000146842	ENST00000467599	929	84928	TMEM209	transmembrane protein 209
7	134290058	134290690	633	*	3' UTR	452	134294606	134295177	572	2	ENSG00000205060	ENST00000466599	4487	84912	SLC35B4	solute carrier family 35 member B4
7	138740808	138741659	852	*	Intron (ENST00000310018/ENSG00000105929, intron 14 of 21)	452	138734188	138747675	13488	2	ENSG00000105929	ENST00000471085	6016	50617	ATP6V0A4	ATPase H+ transporting V0 subunit a4
7	140230408	140231767	1360	*	Distal Intergenic	452	140241870	140242032	163	1	ENSG00000199283	ENST00000362413	-10103	NA	NA	NA
7	140626251	140626891	641	*	Intron (ENST00000275884/ENSG00000146966, intron 1 of 18)	452	140602162	140640298	38137	2	ENSG00000146966	ENST00000477488	13407	27147	DENND2A	DENN domain containing 2A
7	155830080	155830558	479	*	Distal Intergenic	452	155799980	155812463	12484	2	ENSG00000164690	ENST00000297261	-17617	6469	SHH	sonic hedgehog signaling molecule
7	158863256	158864504	1249	*	Intron (ENST00000407559/ENSG00000126870, intron 1 of 24)	452	158869446	158871499	2054	1	ENSG00000126870	ENST00000397143	-4942	55112	WDR60	WD repeat domain 60
8	11726594	11727381	788	*	Intron (ENST00000528712/ENSG00000136574, intron 2 of 6)	453	11708313	11759131	50819	1	ENSG00000136574	ENST00000622443	18281	2626	GATA4	GATA binding protein 4
8	23325793	23326486	694	*	Promoter (2-3kb)	453	23319927	23328768	8842	2	ENSG00000134013	ENST00000522446	2282	4017	LOXL2	lysyl oxidase like 2
8	28369217	28369731	515	*	Intron (ENST00000344423/ENSG00000186918, intron 1 of 9)	453	28365348	28375378	10031	2	ENSG00000186918	ENST00000519730	5647	55893	ZNF395	zinc finger protein 395
8	41717844	41718194	351	*	Exon (ENST00000347528/ENSG00000029534, exon 11 of 42)	453	41655324	41706179	50856	2	ENSG00000029534	ENST00000520299	-11665	286	ANK1	ankyrin 1
8	48930260	48930946	687	*	Exon (ENST00000668879/ENSG00000287788, exon 2 of 2)	453	48925917	48931288	5372	1	ENSG00000287788	ENST00000668879	4343	NA	NA	NA
8	49071915	49072459	545	*	Promoter (<=1kb)	453	49072344	49076090	3747	1	ENSG00000168333	ENST00000399653	0	492307	PPDPFL	pancreatic progenitor cell differentiation and proliferation factor like
8	57376282	57377065	784	*	Distal Intergenic	453	57392546	57392882	337	1	ENSG00000243050	ENST00000488148	-15481	NA	NA	NA
8	57855094	57855757	664	*	Promoter (<=1kb)	453	57855500	57984114	128615	1	ENSG00000205293	ENST00000650579	0	100505477	LINC01602	long intergenic non-protein coding RNA 1602
8	69642461	69642980	520	*	Intron (ENST00000260128/ENSG00000137573, intron 22 of 22)	453	69638811	69641147	2337	1	ENSG00000137573	ENST00000526654	3650	23213	SULF1	sulfatase 1
8	69653650	69654456	807	*	Intron (ENST00000260128/ENSG00000137573, intron 22 of 22)	453	69638811	69641147	2337	1	ENSG00000137573	ENST00000526654	14839	23213	SULF1	sulfatase 1
8	93392940	93393574	635	*	Intron (ENST00000520096/ENSG00000246662, intron 1 of 5)	453	93213310	93420880	207571	2	ENSG00000246662	ENST00000520096	27306	642924	LINC00535	long intergenic non-protein coding RNA 535
8	100761342	100762160	819	*	Distal Intergenic	453	100755099	100755195	97	2	ENSG00000202001	ENST00000365131	-6147	NA	NA	NA
8	118056203	118056674	472	*	Intron (ENST00000378204/ENSG00000182197, intron 1 of 10)	453	117822465	118110414	287950	2	ENSG00000182197	ENST00000436216	53740	2131	EXT1	exostosin glycosyltransferase 1
8	120315630	120316104	475	*	Exon (ENST00000297848/ENSG00000187955, exon 40 of 48)	453	120345446	120371081	25636	1	ENSG00000187955	ENST00000440844	-29342	7373	COL14A1	collagen type XIV alpha 1 chain
8	121530303	121530894	592	*	Distal Intergenic	453	121639293	121643451	4159	1	ENSG00000248690	ENST00000518865	-108399	NA	NA	NA
8	123174284	123174902	619	*	Distal Intergenic	453	123178960	123180615	1656	1	ENSG00000147689	ENST00000523819	-4058	84985	FAM83A	family with sequence similarity 83 member A
8	125606259	125606831	573	*	Distal Intergenic	453	125648327	125955592	307266	1	ENSG00000286122	ENST00000651999	-41496	NA	NA	NA
8	129508390	129509007	618	*	Intron (ENST00000675388/ENSG00000229140, intron 1 of 8)	453	129484057	129484142	86	2	ENSG00000263763	ENST00000577904	-24248	100500839	MIR3686	microRNA 3686
8	130649515	130650010	496	*	Intron (ENST00000523502/ENSG00000253656, intron 1 of 2)	453	130595299	130655712	60414	2	ENSG00000253656	ENST00000523502	5702	NA	NA	NA
8	132991484	132991905	422	*	Intron (ENST00000220616/ENSG00000042832, intron 35 of 47)	453	133002605	133003075	471	2	ENSG00000240237	ENST00000485217	11170	NA	NA	NA
8	133036831	133037329	499	*	3' UTR	453	133038260	133040341	2082	2	ENSG00000155926	ENST00000517549	3012	6503	SLA	Src like adaptor
8	133206945	133207302	358	*	Intron (ENST00000377862/ENSG00000104415, intron 1 of 2)	453	133191137	133228064	36928	1	ENSG00000104415	ENST00000220856	15808	8840	CCN4	cellular communication network factor 4
8	133216278	133217436	1159	*	Intron (ENST00000377862/ENSG00000104415, intron 1 of 2)	453	133237176	133241527	4352	2	ENSG00000104419	ENST00000521438	24091	10397	NDRG1	N-myc downstream regulated 1
8	133217753	133218409	657	*	Intron (ENST00000377862/ENSG00000104415, intron 1 of 2)	453	133237176	133241527	4352	2	ENSG00000104419	ENST00000521438	23118	10397	NDRG1	N-myc downstream regulated 1
8	133227585	133228776	1192	*	3' UTR	453	133237176	133241527	4352	2	ENSG00000104419	ENST00000521438	12751	10397	NDRG1	N-myc downstream regulated 1
8	133320470	133320999	530	*	Distal Intergenic	453	133325997	133326404	408	1	ENSG00000243537	ENST00000479066	-4998	NA	NA	NA
8	133363160	133363657	498	*	Distal Intergenic	453	133392211	133392690	480	2	ENSG00000253638	ENST00000517470	29033	NA	NA	NA
8	133381921	133382632	712	*	Distal Intergenic	453	133392211	133392690	480	2	ENSG00000253638	ENST00000517470	10058	NA	NA	NA
8	133383133	133383810	678	*	Distal Intergenic	453	133392211	133392690	480	2	ENSG00000253638	ENST00000517470	8880	NA	NA	NA
9	2427368	2427952	585	*	Promoter (1-2kb)	454	2421926	2425957	4032	2	ENSG00000236404	ENST00000653709	-1411	401491	VLDLR-AS1	VLDLR antisense RNA 1
9	4832901	4833557	657	*	5' UTR	454	4836726	4860472	23747	1	ENSG00000120158	ENST00000381730	-3169	10171	RCL1	RNA terminal phosphate cyclase like 1
9	5621333	5621717	385	*	Intron (ENST00000661858/ENSG00000286162, intron 1 of 2)	454	5577021	5628981	51961	2	ENSG00000286162	ENST00000650674	7264	NA	NA	NA
9	6034437	6035416	980	*	Distal Intergenic	454	6047360	6066714	19355	1	ENSG00000228739	ENST00000437881	-11944	NA	NA	NA
9	16246829	16247830	1002	*	Intron (ENST00000380685/ENSG00000205549, intron 1 of 3)	454	16203947	16253114	49168	2	ENSG00000205549	ENST00000433347	5284	100129385	C9orf92	chromosome 9 open reading frame 92
9	16399878	16400269	392	*	Intron (ENST00000648575/ENSG00000205549, intron 2 of 3)	454	16203948	16410990	207043	2	ENSG00000205549	ENST00000648575	10721	100129385	C9orf92	chromosome 9 open reading frame 92
9	19161559	19162273	715	*	Distal Intergenic	454	19129737	19149290	19554	2	ENSG00000147872	ENST00000494753	-12269	123	PLIN2	perilipin 2
9	27519828	27520689	862	*	Intron (ENST00000262244/ENSG00000120162, intron 1 of 3)	454	27524314	27526498	2185	1	ENSG00000147896	ENST00000276943	-3625	56832	IFNK	interferon kappa
9	89431002	89431388	387	*	Intron (ENST00000339861/ENSG00000187764, intron 1 of 18)	454	89402945	89436463	33519	2	ENSG00000187764	ENST00000418828	5075	10507	SEMA4D	semaphorin 4D
9	93244336	93244893	558	*	Intron (ENST00000448039/ENSG00000165238, intron 6 of 9)	454	93234923	93319208	84286	1	ENSG00000165238	ENST00000411624	9413	65268	WNK2	WNK lysine deficient protein kinase 2
9	100575718	100576337	620	*	Promoter (1-2kb)	454	100578079	100588389	10311	1	ENSG00000170681	ENST00000307584	-1742	347273	CAVIN4	caveolae associated protein 4
9	108520940	108521591	652	*	Distal Intergenic	454	108626833	108627150	318	1	ENSG00000169253	ENST00000306634	-105242	NA	NA	NA
9	123753618	123754366	749	*	Intron (ENST00000473039/ENSG00000119522, intron 4 of 17)	454	123569545	123757759	188215	2	ENSG00000119522	ENST00000474676	3393	57706	DENND1A	DENN domain containing 1A
9	126474623	126475196	574	*	Intron (ENST00000361171/ENSG00000196814, intron 7 of 9)	454	126480813	126507041	26229	1	ENSG00000196814	ENST00000485886	-5617	89853	MVB12B	multivesicular body subunit 12B
9	130499838	130500477	640	*	Intron (ENST00000352480/ENSG00000130707, intron 14 of 14)	454	130479856	130501178	21323	1	ENSG00000130707	ENST00000372386	19982	445	ASS1	argininosuccinate synthase 1
9	131727387	131727784	398	*	Promoter (1-2kb)	454	131725168	131725467	300	2	ENSG00000240853	ENST00000484033	-1920	NA	NA	NA
10	454797	455281	485	*	Intron (ENST00000381496/ENSG00000151240, intron 2 of 35)	455	437561	441170	3610	1	ENSG00000233021	ENST00000425723	17236	NA	NA	NA
10	5595788	5596418	631	*	Promoter (<=1kb)	455	5594984	5596118	1135	2	ENSG00000242147	ENST00000478294	0	105376382	LINC02657	long intergenic non-protein coding RNA 2657
10	10320954	10321370	417	*	Distal Intergenic	455	10326875	10337876	11002	2	ENSG00000286439	ENST00000664907	16506	NA	NA	NA
10	14466264	14466707	444	*	Distal Intergenic	455	14326175	14462142	135968	2	ENSG00000151474	ENST00000475141	-4122	55691	FRMD4A	FERM domain containing 4A
10	19013984	19014517	534	*	Distal Intergenic	455	19048801	19734478	685678	1	ENSG00000204740	ENST00000454679	-34284	340895	MALRD1	MAM and LDL receptor class A domain containing 1
10	31075336	31075887	552	*	Intron (ENST00000658872/ENSG00000287564, intron 1 of 2)	455	31033089	31143813	110725	1	ENSG00000287564	ENST00000658872	42247	NA	NA	NA
10	32413388	32414001	614	*	Exon (ENST00000658560/ENSG00000286409, exon 3 of 3)	455	32394558	32394665	108	2	ENSG00000200484	ENST00000363614	-18723	NA	NA	NA
10	35789821	35790357	537	*	Intron (ENST00000626667/ENSG00000280719, intron 1 of 2)	455	35778302	35800920	22619	1	ENSG00000280719	ENST00000626667	11519	102578074	PCAT5	prostate cancer associated transcript 5
10	49177423	49177941	519	*	Promoter (<=1kb)	455	49154728	49178401	23674	2	ENSG00000204161	ENST00000374156	460	170371	TMEM273	transmembrane protein 273
10	66836124	66836483	360	*	Promoter (<=1kb)	455	66837457	66837704	248	1	ENSG00000277056	ENST00000620045	-974	NA	NA	NA
10	75532559	75532880	322	*	Intron (ENST00000611255/ENSG00000148655, intron 2 of 6)	455	75552458	75552553	96	1	ENSG00000207583	ENST00000384851	-19578	693191	MIR606	microRNA 606
10	78830354	78830947	594	*	Distal Intergenic	455	78943328	78962394	19067	2	ENSG00000224596	ENST00000428862	131447	283050	ZMIZ1-AS1	ZMIZ1 antisense RNA 1
10	79984852	79985233	382	*	Promoter (1-2kb)	455	79982910	79983240	331	2	ENSG00000225100	ENST00000456300	-1612	NA	NA	NA
10	95406816	95407304	489	*	Intron (ENST00000371227/ENSG00000095637, intron 10 of 31)	455	95384051	95413764	29714	2	ENSG00000095637	ENST00000465489	6460	10580	SORBS1	sorbin and SH3 domain containing 1
10	103777122	103777867	746	*	Intron (ENST00000369774/ENSG00000107957, intron 2 of 14)	455	103601746	103801297	199552	2	ENSG00000107957	ENST00000420222	23430	9644	SH3PXD2A	SH3 and PX domains 2A
10	103779397	103779878	482	*	Intron (ENST00000369774/ENSG00000107957, intron 2 of 14)	455	103601746	103801297	199552	2	ENSG00000107957	ENST00000420222	21419	9644	SH3PXD2A	SH3 and PX domains 2A
10	110209501	110210426	926	*	Promoter (<=1kb)	455	110210231	110286506	76276	1	ENSG00000119950	ENST00000361248	0	4601	MXI1	MAX interactor 1, dimerization protein
10	112934052	112934865	814	*	Distal Intergenic	455	112950247	113167678	217432	1	ENSG00000148737	ENST00000627217	-15382	6934	TCF7L2	transcription factor 7 like 2
10	118835525	118836202	678	*	Intron (ENST00000663084/ENSG00000229272, intron 3 of 3)	455	118872054	118872602	549	2	ENSG00000236058	ENST00000420302	36400	NA	NA	NA
10	132208201	132209554	1354	*	Exon (ENST00000462160/ENSG00000165752, exon 11 of 13)	455	132203553	132204907	1355	1	ENSG00000151640	ENST00000471544	4648	10570	DPYSL4	dihydropyrimidinase like 4
12	7982241	7982705	465	*	Distal Intergenic	457	7976259	7976360	102	1	ENSG00000206636	ENST00000383909	5982	NA	NA	NA
12	30828612	30829214	603	*	Intron (ENST00000648700/ENSG00000285517, intron 2 of 2)	457	30800211	30801997	1787	1	ENSG00000285517	ENST00000551972	28401	NA	NA	NA
12	32943987	32944607	621	*	Distal Intergenic	457	32985838	32987070	1233	1	ENSG00000257316	ENST00000553060	-41231	NA	NA	NA
12	41292711	41293716	1006	*	Intron (ENST00000402685/ENSG00000165966, intron 3 of 9)	457	41188320	41574745	386426	1	ENSG00000165966	ENST00000402685	104391	29951	PDZRN4	PDZ domain containing ring finger 4
12	54431985	54433080	1096	*	Intron (ENST00000550474/ENSG00000258137, intron 2 of 3)	457	54428303	54429403	1101	1	ENSG00000257477	ENST00000548617	3682	NA	NA	NA
12	65999225	66000038	814	*	Distal Intergenic	457	66023620	66023726	107	2	ENSG00000276878	ENST00000612054	23688	102464827	MIR6074	microRNA 6074
12	69655866	69656453	588	*	Intron (ENST00000547208/ENSG00000127325, intron 6 of 6)	457	69660034	69661429	1396	2	ENSG00000279551	ENST00000622965	4976	NA	NA	NA
12	70976678	70977121	444	*	Distal Intergenic	457	71007773	71032083	24311	2	ENSG00000257265	ENST00000552098	54962	NA	NA	NA
12	80001349	80002075	727	*	Distal Intergenic	457	79989014	79989218	205	2	ENSG00000271496	ENST00000604477	-12131	NA	NA	NA
12	80648795	80649337	543	*	Exon (ENST00000644991/ENSG00000139304, exon 36 of 45)	457	80634670	80652824	18155	1	ENSG00000139304	ENST00000549355	14125	374462	PTPRQ	protein tyrosine phosphatase receptor type Q
12	92289995	92290623	629	*	Intron (ENST00000615716/ENSG00000277851, intron 2 of 4)	457	92247697	92363832	116136	2	ENSG00000277851	ENST00000615716	73209	NA	NA	NA
12	97912712	97913432	721	*	Distal Intergenic	457	97939056	97939121	66	2	ENSG00000265861	ENST00000577562	25689	100616287	MIR4495	microRNA 4495
12	102631173	102631763	591	*	Distal Intergenic	457	102513251	102513655	405	2	ENSG00000257254	ENST00000551181	-117518	NA	NA	NA
12	109539488	109539900	413	*	Distal Intergenic	457	109529930	109534538	4609	1	ENSG00000151148	ENST00000605142	9558	89910	UBE3B	ubiquitin protein ligase E3B
12	120474632	120475000	369	*	Intron (ENST00000392509/ENSG00000088986, intron 1 of 2)	457	120469883	120498237	28355	1	ENSG00000088986	ENST00000548342	4749	8655	DYNLL1	dynein light chain LC8-type 1
12	124026627	124027441	815	*	Intron (ENST00000618862/ENSG00000274874, intron 3 of 3)	457	124005871	124006225	355	2	ENSG00000256827	ENST00000536166	-20402	NA	NA	NA
12	131901930	131902778	849	*	Intron (ENST00000321867/ENSG00000177169, intron 3 of 27)	457	131906490	131909996	3507	1	ENSG00000177169	ENST00000537421	-3712	8408	ULK1	unc-51 like autophagy activating kinase 1
13	20378727	20379115	389	*	Distal Intergenic	458	20433778	20433846	69	2	ENSG00000263978	ENST00000584834	54731	100616304	MIR4499	microRNA 4499
13	33739910	33740678	769	*	Distal Intergenic	458	33800138	33802853	2716	1	ENSG00000286779	ENST00000667510	-59460	NA	NA	NA
13	44108399	44108869	471	*	Promoter (<=1kb)	458	44105488	44108684	3197	2	ENSG00000226519	ENST00000654658	0	NA	NA	NA
13	64551724	64552219	496	*	Distal Intergenic	458	64958097	64959396	1300	2	ENSG00000214269	ENST00000441282	407177	NA	NA	NA
13	67299120	67300106	987	*	Distal Intergenic	458	67326177	67379994	53818	1	ENSG00000230040	ENST00000656527	-26071	100874145	LINC00364	long intergenic non-protein coding RNA 364
13	82370139	82370824	686	*	Distal Intergenic	458	82823131	82824136	1006	1	ENSG00000237099	ENST00000426437	-452307	NA	NA	NA
13	84400647	84401231	585	*	Intron (ENST00000653443/ENSG00000288016, intron 3 of 4)	458	84520103	84521568	1466	1	ENSG00000228597	ENST00000457501	-118872	NA	NA	NA
13	85665314	85665717	404	*	Distal Intergenic	458	85693937	85783203	89267	2	ENSG00000285834	ENST00000647840	117486	NA	NA	NA
13	98775940	98776686	747	*	Distal Intergenic	458	98683801	98752672	68872	2	ENSG00000088386	ENST00000376503	-23268	6564	SLC15A1	solute carrier family 15 member 1
13	98997676	98998555	880	*	Intron (ENST00000448493/ENSG00000088387, intron 1 of 52)	458	98809311	99015780	206470	2	ENSG00000088387	ENST00000339416	17225	23348	DOCK9	dedicator of cytokinesis 9
13	100131932	100132584	653	*	Intron (ENST00000376279/ENSG00000175198, intron 4 of 22)	458	100149201	100161625	12425	1	ENSG00000175198	ENST00000485946	-16617	5095	PCCA	propionyl-CoA carboxylase subunit alpha
13	108463336	108463802	467	*	Distal Intergenic	458	108480226	108481817	1592	1	ENSG00000232087	ENST00000392864	-16424	NA	NA	NA
13	108987433	108987938	506	*	Intron (ENST00000356711/ENSG00000041515, intron 20 of 34)	458	109101261	109101919	659	2	ENSG00000229938	ENST00000412809	113981	NA	NA	NA
13	109628087	109628681	595	*	Intron (ENST00000650264/ENSG00000285534, intron 1 of 3)	458	109728282	109730007	1726	1	ENSG00000234854	ENST00000416090	-99601	101409253	LINC00676	long intergenic non-protein coding RNA 676
13	111337097	111337555	459	*	Intron (ENST00000497241/ENSG00000153495, intron 3 of 6)	458	111320642	111344248	23607	1	ENSG00000153495	ENST00000283547	16455	121793	TEX29	testis expressed 29
13	113821131	113821626	496	*	Promoter (1-2kb)	458	113820549	113823194	2646	2	ENSG00000183087	ENST00000608763	1568	2621	GAS6	growth arrest specific 6
13	113897016	113897985	970	*	Promoter (1-2kb)	458	113895103	113921317	26215	1	ENSG00000229373	ENST00000426859	1913	643365	LINC00452	long intergenic non-protein coding RNA 452
14	33435851	33436309	459	*	Intron (ENST00000551634/ENSG00000151322, intron 3 of 10)	459	33560185	33585979	25795	1	ENSG00000151322	ENST00000552696	-123876	64067	NPAS3	neuronal PAS domain protein 3
14	33938055	33938969	915	*	Intron (ENST00000250457/ENSG00000129521, intron 1 of 4)	459	33925511	33931336	5826	2	ENSG00000129521	ENST00000556785	-6719	112399	EGLN3	egl-9 family hypoxia inducible factor 3
14	34231515	34232023	509	*	Intron (ENST00000551935/ENSG00000129521, intron 1 of 4)	459	34096163	34227814	131652	2	ENSG00000129521	ENST00000546681	-3701	112399	EGLN3	egl-9 family hypoxia inducible factor 3
14	38357506	38357892	387	*	Intron (ENST00000655453/ENSG00000259072, intron 3 of 3)	459	38290953	38311930	20978	1	ENSG00000259072	ENST00000555636	66553	NA	NA	NA
14	49505358	49505974	617	*	Distal Intergenic	459	49552633	49552748	116	1	ENSG00000252424	ENST00000516615	-46659	NA	NA	NA
14	49992904	49993366	463	*	Promoter (<=1kb)	459	49990944	49993121	2178	2	ENSG00000214900	ENST00000658223	0	283551	LINC01588	long intergenic non-protein coding RNA 1588
14	50542890	50543476	587	*	Intron (ENST00000556478/ENSG00000198513, intron 1 of 2)	459	50533026	50633049	100024	1	ENSG00000198513	ENST00000441560	9864	51062	ATL1	atlastin GTPase 1
14	51181881	51182620	740	*	Distal Intergenic	459	51240162	51245851	5690	1	ENSG00000139921	ENST00000555574	-57542	81542	TMX1	thioredoxin related transmembrane protein 1
14	55831994	55832643	650	*	Distal Intergenic	459	55781132	55796731	15600	2	ENSG00000258791	ENST00000647781	-35263	645687	LINC00520	long intergenic non-protein coding RNA 520
14	56271880	56272480	601	*	Intron (ENST00000559044/ENSG00000139946, intron 2 of 4)	459	56305838	56306394	557	1	ENSG00000275569	ENST00000612106	-33358	NA	NA	NA
14	63178815	63179465	651	*	Promoter (<=1kb)	459	63122888	63178190	55303	2	ENSG00000259093	ENST00000654636	-625	105370531	LOC105370531	uncharacterized LOC105370531
14	64421015	64421560	546	*	Promoter (1-2kb)	459	64419203	64426192	6990	1	ENSG00000100714	ENST00000554057	1812	4522	MTHFD1	methylenetetrahydrofolate dehydrogenase, cyclohydrolase and formyltetrahydrofolate synthetase 1
14	64721323	64721832	510	*	Promoter (1-2kb)	459	64723781	64730278	6498	1	ENSG00000126822	ENST00000554499	-1949	26030	PLEKHG3	pleckstrin homology and RhoGEF domain containing G3
14	68535233	68536131	899	*	Intron (ENST00000487861/ENSG00000182185, intron 10 of 10)	459	68545562	68594988	49427	1	ENSG00000182185	ENST00000556251	-9431	5890	RAD51B	RAD51 paralog B
14	77663127	77663905	779	*	Distal Intergenic	459	77652827	77653055	229	2	ENSG00000258668	ENST00000555293	-10072	NA	NA	NA
14	96225606	96226186	581	*	Promoter (2-3kb)	459	96223108	96223347	240	1	ENSG00000258788	ENST00000555221	2498	NA	NA	NA
14	97180251	97180856	606	*	Promoter (<=1kb)	459	97180525	97217778	37254	1	ENSG00000285584	ENST00000648645	0	NA	NA	NA
14	100204327	100204997	671	*	Downstream (2-3kb)	459	100238298	100239346	1049	1	ENSG00000100811	ENST00000554371	-33301	7528	YY1	YY1 transcription factor
14	103618966	103619470	505	*	Intron (ENST00000557172/ENSG00000126214, intron 1 of 2)	459	103629177	103714249	85073	1	ENSG00000126214	ENST00000348520	-9707	3831	KLC1	kinesin light chain 1
15	22599897	22600380	484	*	Distal Intergenic	460	22606022	22608126	2105	2	ENSG00000277561	ENST00000647991	7746	283796	GOLGA8IP	golgin A8 family member I, pseudogene
15	35281520	35282057	538	*	Promoter (<=1kb)	460	35282596	35282980	385	1	ENSG00000259710	ENST00000560892	-539	NA	NA	NA
15	59570282	59570776	495	*	Distal Intergenic	460	59574103	59574222	120	2	ENSG00000201704	ENST00000364834	3446	NA	NA	NA
15	59919300	59920012	713	*	Distal Intergenic	460	59964942	59966084	1143	1	ENSG00000259573	ENST00000559657	-44930	NA	NA	NA
15	68552463	68553201	739	*	Distal Intergenic	460	68578993	68727806	148814	1	ENSG00000103647	ENST00000261861	-25792	10391	CORO2B	coronin 2B
15	69100746	69101730	985	*	Distal Intergenic	460	69080879	69099987	19109	1	ENSG00000259222	ENST00000559870	19867	NA	NA	NA
15	71374483	71375039	557	*	Intron (ENST00000355327/ENSG00000187720, intron 6 of 17)	460	71342324	71348471	6148	1	ENSG00000260586	ENST00000562681	32159	NA	NA	NA
15	80178985	80179506	522	*	Promoter (1-2kb)	460	80177407	80186351	8945	1	ENSG00000103876	ENST00000559217	1578	2184	FAH	fumarylacetoacetate hydrolase
15	80580077	80580527	451	*	Promoter (<=1kb)	460	80580029	80580566	538	2	ENSG00000270919	ENST00000603875	39	NA	NA	NA
15	81829156	81829889	734	*	Intron (ENST00000559428/ENSG00000259692, intron 1 of 2)	460	81660487	81798070	137584	2	ENSG00000259692	ENST00000668584	-31086	NA	NA	NA
15	84894833	84895332	500	*	Exon (ENST00000338602/ENSG00000156222, exon 6 of 7)	460	84884678	84945796	61119	1	ENSG00000156222	ENST00000286749	10155	9154	SLC28A1	solute carrier family 28 member 1
15	90126538	90127437	900	*	Intron (ENST00000561101/ENSG00000259685, intron 3 of 4)	460	90102649	90138016	35368	1	ENSG00000259685	ENST00000561101	23889	NA	NA	NA
15	101613366	101613875	510	*	Promoter (<=1kb)	460	101609100	101614383	5284	2	ENSG00000286733	ENST00000618724	508	101927505	LINC02348	long intergenic non-protein coding RNA 2348
15	101615612	101616508	897	*	Promoter (1-2kb)	460	101602786	101614531	11746	2	ENSG00000286733	ENST00000655738	-1081	101927505	LINC02348	long intergenic non-protein coding RNA 2348
16	14423281	14423826	546	*	Distal Intergenic	461	14410263	14418908	8646	2	ENSG00000263257	ENST00000656661	-4373	NA	NA	NA
16	19680761	19681398	638	*	Intron (ENST00000438132/ENSG00000103544, intron 27 of 30)	461	19691456	19706793	15338	1	ENSG00000103544	ENST00000542027	-10058	57020	VPS35L	VPS35 endosomal protein sorting factor like
16	30541385	30541826	442	*	Distal Intergenic	461	30537202	30538231	1030	2	ENSG00000260494	ENST00000569728	-3154	NA	NA	NA
16	56814706	56815104	399	*	Intron (ENST00000563858/ENSG00000102900, intron 2 of 7)	461	56831515	56833389	1875	1	ENSG00000102900	ENST00000563437	-16411	9688	NUP93	nucleoporin 93
16	58459362	58459720	359	*	Intron (ENST00000561906/ENSG00000260186, intron 2 of 3)	461	58462846	58504649	41804	1	ENSG00000103034	ENST00000568999	-3126	65009	NDRG4	NDRG family member 4
16	68756063	68756641	579	*	Intron (ENST00000612417/ENSG00000039068, intron 2 of 13)	461	68763294	68833538	70245	1	ENSG00000039068	ENST00000562836	-6653	999	CDH1	cadherin 1
16	71474910	71475331	422	*	3' UTR	461	71477886	71478999	1114	2	ENSG00000157429	ENST00000561469	3668	7567	ZNF19	zinc finger protein 19
16	73202067	73202773	707	*	Intron (ENST00000641206/ENSG00000140836, intron 5 of 17)	461	73232055	73233108	1054	1	ENSG00000261227	ENST00000577171	-29282	NA	NA	NA
16	77409262	77409810	549	*	Intron (ENST00000282849/ENSG00000140873, intron 3 of 22)	461	77364352	77431587	67236	2	ENSG00000140873	ENST00000562345	21777	170692	ADAMTS18	ADAM metallopeptidase with thrombospondin type 1 motif 18
16	80006191	80007098	908	*	Distal Intergenic	461	80040662	80045745	5084	1	ENSG00000260237	ENST00000565531	-33564	NA	NA	NA
16	84247367	84248282	916	*	Distal Intergenic	461	84235408	84239750	4343	2	ENSG00000168418	ENST00000568181	-7617	93107	KCNG4	potassium voltage-gated channel modifier subfamily G member 4
16	89067527	89068339	813	*	Distal Intergenic	461	89046231	89052966	6736	2	ENSG00000256982	ENST00000669920	-14561	NA	NA	NA
17	6456750	6457394	645	*	Intron (ENST00000262483/ENSG00000091622, intron 19 of 19)	462	6460569	6463881	3313	2	ENSG00000091622	ENST00000575201	6487	83394	PITPNM3	PITPNM family member 3
17	7440023	7441135	1113	*	Promoter (<=1kb)	462	7440742	7443556	2815	1	ENSG00000161958	ENST00000575398	0	2256	FGF11	fibroblast growth factor 11
17	9371022	9371479	458	*	Intron (ENST00000306357/ENSG00000170310, intron 7 of 7)	462	9250474	9437889	187416	2	ENSG00000170310	ENST00000570583	66410	9482	STX8	syntaxin 8
17	10085882	10086567	686	*	Intron (ENST00000432992/ENSG00000007237, intron 1 of 13)	462	9946933	10061379	114447	2	ENSG00000007237	ENST00000584389	-24503	8522	GAS7	growth arrest specific 7
17	12902547	12903099	553	*	Intron (ENST00000379672/ENSG00000006740, intron 3 of 20)	462	12917268	12917342	75	2	ENSG00000265503	ENST00000580405	14243	100616494	MIR1269B	microRNA 1269b
17	40312088	40312680	593	*	Promoter (2-3kb)	462	40309192	40348336	39145	1	ENSG00000131759	ENST00000577646	2896	5914	RARA	retinoic acid receptor alpha
17	44972812	44973380	569	*	Intron (ENST00000678938/ENSG00000136448, intron 1 of 11)	462	44959693	44968303	8611	2	ENSG00000131094	ENST00000253407	-4509	10882	C1QL1	complement C1q like 1
17	50890743	50891083	341	*	Intron (ENST00000671267/ENSG00000229980, intron 1 of 1)	462	50908678	50909417	740	1	ENSG00000229980	ENST00000519432	-17595	400604	TOB1-AS1	TOB1 antisense RNA 1
17	62178563	62178950	388	*	Distal Intergenic	462	62136972	62140639	3668	2	ENSG00000266066	ENST00000578759	-37924	NA	NA	NA
17	64459200	64459850	651	*	Intron (ENST00000615220/ENSG00000271605, intron 4 of 8)	462	64465452	64467935	2484	1	ENSG00000271605	ENST00000620304	-5602	284021	MILR1	mast cell immunoglobulin like receptor 1
17	72602671	72603429	759	*	Promoter (<=1kb)	462	72403327	72603162	199836	2	ENSG00000227036	ENST00000649833	0	400619	LINC00511	long intergenic non-protein coding RNA 511
17	72613789	72614342	554	*	Promoter (<=1kb)	462	72598071	72615134	17064	2	ENSG00000227036	ENST00000647871	792	400619	LINC00511	long intergenic non-protein coding RNA 511
18	2898041	2898461	421	*	Intron (ENST00000254528/ENSG00000132205, intron 4 of 7)	463	2906215	2914041	7827	1	ENSG00000132205	ENST00000308080	-7754	84034	EMILIN2	elastin microfibril interfacer 2
18	3675403	3675852	450	*	Intron (ENST00000400147/ENSG00000170579, intron 4 of 9)	463	3653410	3656282	2873	1	ENSG00000266401	ENST00000577848	21993	105371967	LOC105371967	uncharacterized LOC105371967
18	9731331	9731764	434	*	Intron (ENST00000578734/ENSG00000168461, intron 1 of 5)	463	9734882	9735602	721	2	ENSG00000266891	ENST00000578806	3838	NA	NA	NA
18	11676827	11677337	511	*	Distal Intergenic	463	11666456	11670165	3710	2	ENSG00000260759	ENST00000561598	-6662	NA	NA	NA
18	49838924	49839449	526	*	Promoter (<=1kb)	463	49839867	49840526	660	1	ENSG00000267322	ENST00000617833	-418	677769	SCARNA17	small Cajal body-specific RNA 17
19	2087015	2087555	541	*	Promoter (1-2kb)	464	2078446	2085652	7207	2	ENSG00000172081	ENST00000586676	-1363	126308	MOB3A	MOB kinase activator 3A
19	2089698	2090679	982	*	Promoter (<=1kb)	464	2078372	2090176	11805	2	ENSG00000172081	ENST00000591326	0	126308	MOB3A	MOB kinase activator 3A
19	3828345	3829010	666	*	Intron (ENST00000262961/ENSG00000105278, intron 5 of 18)	464	3785247	3802129	16883	2	ENSG00000007264	ENST00000590980	-26216	4145	MATK	megakaryocyte-associated tyrosine kinase
19	15072839	15073518	680	*	Distal Intergenic	464	15082211	15092970	10760	1	ENSG00000094661	ENST00000641398	-8693	126370	OR1I1	olfactory receptor family 1 subfamily I member 1
19	18225812	18226451	640	*	Promoter (<=1kb)	464	18210831	18226425	15595	2	ENSG00000105650	ENST00000599188	0	5143	PDE4C	phosphodiesterase 4C
19	41380111	41380568	458	*	Promoter (1-2kb)	464	41378468	41384077	5610	1	ENSG00000142046	ENST00000546362	1643	641649	TMEM91	transmembrane protein 91
19	45576883	45577777	895	*	Intron (ENST00000323060/ENSG00000125741, intron 1 of 1)	464	45546281	45584802	38522	2	ENSG00000125741	ENST00000263275	7025	80207	OPA3	outer mitochondrial membrane lipid metabolism regulator OPA3
19	46951208	46952029	822	*	Intron (ENST00000672722/ENSG00000160007, intron 3 of 6)	464	46946535	46949156	2622	1	ENSG00000279948	ENST00000624074	4673	NA	NA	NA
19	55352064	55352411	348	*	Promoter (<=1kb)	464	55352007	55352168	162	2	ENSG00000160471	ENST00000588586	0	125965	COX6B2	cytochrome c oxidase subunit 6B2
20	4225744	4226187	444	*	Intron (ENST00000379453/ENSG00000171873, intron 1 of 1)	465	4221681	4222381	701	2	ENSG00000171873	ENST00000621688	-3363	146	ADRA1D	adrenoceptor alpha 1D
20	35617392	35617948	557	*	Promoter (<=1kb)	465	35617689	35620934	3246	1	ENSG00000061656	ENST00000498203	0	6676	SPAG4	sperm associated antigen 4
20	37542231	37542616	386	*	Distal Intergenic	465	37530039	37530543	505	1	ENSG00000235044	ENST00000450588	12192	NA	NA	NA
20	40431577	40432197	621	*	Distal Intergenic	465	40685848	40689236	3389	2	ENSG00000204103	ENST00000373313	257039	9935	MAFB	MAF bZIP transcription factor B
20	45087839	45088786	948	*	Downstream (2-3kb)	465	45092310	45101112	8803	2	ENSG00000124134	ENST00000306117	12326	3787	KCNS1	potassium voltage-gated channel modifier subfamily S member 1
20	45104826	45105206	381	*	Distal Intergenic	465	45091214	45101127	9914	2	ENSG00000124134	ENST00000537075	-3699	3787	KCNS1	potassium voltage-gated channel modifier subfamily S member 1
20	45781363	45781938	576	*	Promoter (1-2kb)	465	45774213	45779893	5681	2	ENSG00000124116	ENST00000474942	-1470	140686	WFDC3	WAP four-disulfide core domain 3
20	45905657	45905994	338	*	Intron (ENST00000354050/ENSG00000100979, intron 7 of 14)	465	45898760	45910937	12178	2	ENSG00000100979	ENST00000372420	4943	5360	PLTP	phospholipid transfer protein
20	46958906	46959824	919	*	Intron (ENST00000357410/ENSG00000064655, intron 1 of 13)	465	46978235	46990070	11836	1	ENSG00000064655	ENST00000497428	-18411	2139	EYA2	EYA transcriptional coactivator and phosphatase 2
20	50670527	50670871	345	*	Intron (ENST00000327979/ENSG00000042062, intron 1 of 21)	465	50653202	50662275	9074	1	ENSG00000234693	ENST00000435177	17325	100506175	LOC100506175	uncharacterized LOC100506175
20	52859086	52859868	783	*	Promoter (2-3kb)	465	52858338	52862855	4518	2	ENSG00000232286	ENST00000426963	2987	NA	NA	NA
20	57810790	57811334	545	*	Distal Intergenic	465	57895394	57895444	51	1	ENSG00000263453	ENST00000582082	-84060	NA	NA	NA
20	58017181	58017964	784	*	Distal Intergenic	465	58003904	58004648	745	1	ENSG00000275852	ENST00000616333	13277	105376992	LINC01742	long intergenic non-protein coding RNA 1742
21	35614306	35615104	799	*	Intron (ENST00000475045/ENSG00000159216, intron 7 of 12)	466	35599732	35600022	291	2	ENSG00000231300	ENST00000431167	-14284	NA	NA	NA
21	41165316	41165670	355	*	Promoter (1-2kb)	466	41167557	41167629	73	1	ENSG00000263681	ENST00000582241	-1887	100423023	MIR3197	microRNA 3197
21	42414854	42415630	777	*	Promoter (1-2kb)	466	42417497	42417593	97	2	ENSG00000252619	ENST00000516810	1963	NA	NA	NA
22	23219701	23220172	472	*	Intron (ENST00000479188/ENSG00000186716, intron 1 of 4)	467	23198332	23253833	55502	1	ENSG00000186716	ENST00000487679	21369	613	BCR	BCR activator of RhoGEF and GTPase
22	30562305	30562858	554	*	Promoter (1-2kb)	467	30555498	30560776	5279	2	ENSG00000128242	ENST00000452827	-1529	9514	GAL3ST1	galactose-3-O-sulfotransferase 1
22	32539511	32540362	852	*	Promoter (1-2kb)	467	32513692	32541716	28025	2	ENSG00000185666	ENST00000332840	1354	8224	SYN3	synapsin III
22	38327438	38328149	712	*	Intron (ENST00000400206/ENSG00000283900, intron 5 of 14)	467	38290691	38318084	27394	2	ENSG00000213923	ENST00000359867	-9354	1454	CSNK1E	casein kinase 1 epsilon
22	39252172	39252608	437	*	Intron (ENST00000641859/ENSG00000284633, intron 1 of 2)	467	39223359	39244982	21624	2	ENSG00000100311	ENST00000331163	-7190	5155	PDGFB	platelet derived growth factor subunit B
22	43126537	43127988	1452	*	Exon (ENST00000216115/ENSG00000100290, exon 3 of 5)	467	43140830	43142964	2135	2	ENSG00000100294	ENST00000608052	14976	27349	MCAT	malonyl-CoA-acyl carrier protein transacylase
22	46984732	46985724	993	*	Intron (ENST00000380995/ENSG00000054611, intron 10 of 13)	467	46914092	46916042	1951	2	ENSG00000280080	ENST00000640274	-68690	642757	TBC1D22A-AS1	TBC1D22A antisense RNA 1
22	47281152	47281576	425	*	Distal Intergenic	467	47259366	47261007	1642	1	ENSG00000280312	ENST00000624605	21786	NA	NA	NA
X	10748997	10749577	581	*	Intron (ENST00000380785/ENSG00000101871, intron 1 of 10)	468	10445310	10677739	232430	2	ENSG00000101871	ENST00000453318	-71258	4281	MID1	midline 1
X	39870130	39870629	500	*	Distal Intergenic	468	39865424	39865888	465	1	ENSG00000214047	ENST00000442125	4706	NA	NA	NA
X	78064864	78065636	773	*	Promoter (<=1kb)	468	78065188	78113844	48657	1	ENSG00000102144	ENST00000477335	0	5230	PGK1	phosphoglycerate kinase 1
X	143780885	143781529	645	*	Intron (ENST00000423667/ENSG00000225970, intron 1 of 2)	468	143757737	143828133	70397	1	ENSG00000225970	ENST00000423667	23148	NA	NA	NA

## Sheet: 24h Hpx up Reox insensitive
seqnames	start	end	width	strand	annotation	geneChr	geneStart	geneEnd	geneLength	geneStrand	geneId	transcriptId	distanceToTSS	ENTREZID	SYMBOL	GENENAME
1	7526315	7527385	1071	*	Intron (ENST00000303635/ENSG00000171735, intron 6 of 22)	446	7441096	7441554	459	2	ENSG00000225126	ENST00000440032	-84761	NA	NA	NA
1	8899919	8900314	396	*	Distal Intergenic	446	8893409	8894151	743	1	ENSG00000238249	ENST00000425872	6510	NA	NA	NA
1	48876268	48876657	390	*	Intron (ENST00000371839/ENSG00000186094, intron 5 of 13)	446	48926021	48936734	10714	1	ENSG00000286597	ENST00000663662	-49364	NA	NA	NA
1	56080053	56080688	636	*	Distal Intergenic	446	56145721	56155224	9504	1	ENSG00000235612	ENST00000435828	-65033	NA	NA	NA
1	69947839	69948488	650	*	Intron (ENST00000651989/ENSG00000033122, intron 8 of 26)	446	69919357	69919657	301	1	ENSG00000229359	ENST00000439639	28482	5301	PIN1P1	peptidylprolyl cis/trans isomerase, NIMA-interacting 1 pseudogene 1
1	88398163	88398910	748	*	Intron (ENST00000645056/ENSG00000237505, intron 3 of 5)	446	88462936	88464079	1144	1	ENSG00000286758	ENST00000662514	-64026	NA	NA	NA
1	168763037	168763603	567	*	Exon (ENST00000457405/ENSG00000235736, exon 2 of 2)	446	168763365	168774490	11126	2	ENSG00000235736	ENST00000457405	10887	NA	NA	NA
1	201584633	201585260	628	*	Distal Intergenic	446	201622885	201623610	726	1	ENSG00000134369	ENST00000593583	-37625	89796	NAV1	neuron navigator 1
1	202084961	202085723	763	*	Distal Intergenic	446	202096759	202096978	220	1	ENSG00000227109	ENST00000416794	-11036	NA	NA	NA
1	209415807	209416481	675	*	Distal Intergenic	446	209428817	209432551	3735	1	ENSG00000230937	ENST00000429156	-12336	642587	MIR205HG	MIR205 host gene
1	221025879	221026464	586	*	Distal Intergenic	446	221133865	221134221	357	2	ENSG00000226211	ENST00000448432	107757	NA	NA	NA
1	221163809	221164400	592	*	Distal Intergenic	446	221133865	221134221	357	2	ENSG00000226211	ENST00000448432	-29588	NA	NA	NA
1	223500485	223500966	482	*	Distal Intergenic	446	223538007	223543166	5160	2	ENSG00000203697	ENST00000484873	42200	388743	CAPN8	calpain 8
2	460789	461392	604	*	Distal Intergenic	447	490944	492655	1712	2	ENSG00000223985	ENST00000427398	31263	727944	LINC01874	long intergenic non-protein coding RNA 1874
2	18535886	18536631	746	*	Distal Intergenic	447	18547386	18548204	819	2	ENSG00000260331	ENST00000565944	11573	NA	NA	NA
2	82182147	82182706	560	*	Distal Intergenic	447	82268612	82268706	95	1	ENSG00000252897	ENST00000517088	-85906	NA	NA	NA
2	206968395	206969102	708	*	Intron (ENST00000272852/ENSG00000144410, intron 8 of 8)	447	206939518	206969474	29957	1	ENSG00000144410	ENST00000272852	28877	130749	CPO	carboxypeptidase O
2	215609053	215609744	692	*	Intron (ENST00000422353/ENSG00000237525, intron 1 of 2)	447	215620108	215621353	1246	2	ENSG00000235770	ENST00000419922	11609	646324	LINC00607	long intergenic non-protein coding RNA 607
3	20622144	20622852	709	*	Intron (ENST00000634618/ENSG00000231304, intron 10 of 16)	448	20732384	21145967	413584	1	ENSG00000231304	ENST00000634837	-109532	100874028	SGO1-AS1	SGO1 antisense RNA 1
3	189928065	189928764	700	*	Distal Intergenic	448	189957697	189964121	6425	2	ENSG00000090530	ENST00000490940	35357	55214	P3H2	prolyl 3-hydroxylase 2
4	97396687	97397154	468	*	Intron (ENST00000651895/ENSG00000251620, intron 1 of 4)	449	97366926	97490164	123239	1	ENSG00000251620	ENST00000508933	29761	101410545	STPG2-AS1	STPG2 antisense RNA 1
5	13510333	13511060	728	*	Distal Intergenic	450	13553654	13553966	313	2	ENSG00000248462	ENST00000503735	42906	NA	NA	NA
5	23257603	23258072	470	*	Distal Intergenic	450	23262159	23263185	1027	2	ENSG00000250319	ENST00000509054	5113	NA	NA	NA
5	27328454	27328947	494	*	Intron (ENST00000650981/ENSG00000250337, intron 2 of 9)	450	27406530	27436421	29892	2	ENSG00000248490	ENST00000510512	107474	NA	NA	NA
6	33896556	33897260	705	*	Promoter (<=1kb)	451	33889511	33896907	7397	2	ENSG00000249346	ENST00000506222	0	100507584	LINC01016	long intergenic non-protein coding RNA 1016
6	131379943	131380442	500	*	Distal Intergenic	451	131469059	131469536	478	1	ENSG00000219776	ENST00000402896	-88617	NA	NA	NA
7	19361979	19362523	545	*	Intron (ENST00000412563/ENSG00000223838, intron 2 of 5)	452	19353534	19578606	225073	1	ENSG00000223838	ENST00000412563	8445	NA	NA	NA
7	70599641	70600201	561	*	Intron (ENST00000644939/ENSG00000158321, intron 5 of 18)	452	70596085	70792485	196401	1	ENSG00000158321	ENST00000644506	3556	26053	AUTS2	activator of transcription and developmental regulator AUTS2
7	106535466	106536089	624	*	Intron (ENST00000490856/ENSG00000243797, intron 2 of 4)	452	106462013	106504839	42827	2	ENSG00000243797	ENST00000475791	-30627	NA	NA	NA
7	138752403	138753101	699	*	Promoter (2-3kb)	452	138706310	138755901	49592	2	ENSG00000105929	ENST00000644341	2800	50617	ATP6V0A4	ATPase H+ transporting V0 subunit a4
7	140315974	140317028	1055	*	Intron (ENST00000477571/ENSG00000157800, intron 13 of 15)	452	140335472	140337825	2354	2	ENSG00000157800	ENST00000485139	20797	84255	SLC37A3	solute carrier family 37 member 3
8	52914844	52915480	637	*	Distal Intergenic	453	52939182	52943734	4553	1	ENSG00000288611	ENST00000674939	-23702	NA	NA	NA
8	133386495	133386905	411	*	Distal Intergenic	453	133392211	133392690	480	2	ENSG00000253638	ENST00000517470	5785	NA	NA	NA
8	133403736	133404424	689	*	Distal Intergenic	453	133408006	133409107	1102	1	ENSG00000225259	ENST00000522430	-3582	NA	NA	NA
9	35673354	35674525	1172	*	Promoter (<=1kb)	454	35673918	35681155	7238	1	ENSG00000107159	ENST00000617161	0	768	CA9	carbonic anhydrase 9
9	115164443	115165141	699	*	Intron (ENST00000649121/ENSG00000173077, intron 5 of 6)	454	115141818	115402644	260827	1	ENSG00000173077	ENST00000374016	22625	50514	2001-12-01	deleted in esophageal cancer 1
10	62422013	62422598	586	*	Intron (ENST00000395255/ENSG00000138311, intron 3 of 4)	455	62375544	62376352	809	1	ENSG00000138311	ENST00000421210	46469	22891	ZNF365	zinc finger protein 365
10	88156371	88156711	341	*	Distal Intergenic	455	88259129	88259372	244	2	ENSG00000275015	ENST00000610667	102661	NA	NA	NA
10	99325245	99325618	374	*	Distal Intergenic	455	99329356	99394330	64975	1	ENSG00000119946	ENST00000356713	-3738	26507	CNNM1	cyclin and CBS domain divalent metal cation transport mediator 1
13	73922628	73923744	1117	*	Intron (ENST00000377669/ENSG00000118922, intron 2 of 6)	458	73686089	73995049	308961	2	ENSG00000118922	ENST00000377669	71305	11278	KLF12	Kruppel like factor 12
13	95481070	95481684	615	*	Intron (ENST00000376873/ENSG00000134873, intron 1 of 4)	458	95433604	95579759	146156	1	ENSG00000134873	ENST00000376873	47466	9071	CLDN10	claudin 10
14	34035242	34036296	1055	*	Intron (ENST00000487915/ENSG00000129521, intron 4 of 5)	459	34040097	34059300	19204	1	ENSG00000258897	ENST00000555922	-3801	NA	NA	NA
14	34052533	34053004	472	*	Intron (ENST00000555922/ENSG00000258897, intron 2 of 2)	459	34040097	34059300	19204	1	ENSG00000258897	ENST00000555922	12436	NA	NA	NA
15	84840651	84841394	744	*	Exon (ENST00000258888/ENSG00000136383, exon 5 of 14)	460	84852498	84852615	118	2	ENSG00000200991	ENST00000364121	11221	NA	NA	NA
15	86362487	86363121	635	*	Intron (ENST00000441037/ENSG00000273540, intron 17 of 24)	460	86305051	86317173	12123	2	ENSG00000260125	ENST00000563472	-45314	727915	AGBL1-AS1	AGBL1 antisense RNA 1
15	87661509	87661960	452	*	Intron (ENST00000670668/ENSG00000287391, intron 2 of 3)	460	87638688	87668488	29801	1	ENSG00000287391	ENST00000670668	22821	NA	NA	NA
15	99029097	99029784	688	*	Promoter (<=1kb)	460	99028538	99031053	2516	1	ENSG00000278090	ENST00000611654	559	NA	NA	NA
16	12341487	12341994	508	*	Intron (ENST00000566228/ENSG00000048471, intron 15 of 20)	461	12356253	12443365	87113	1	ENSG00000048471	ENST00000562510	-14259	92017	SNX29	sorting nexin 29
16	80250125	80250946	822	*	Intron (ENST00000668341/ENSG00000259867, intron 2 of 5)	461	80179129	80180682	1554	1	ENSG00000261376	ENST00000566030	70996	NA	NA	NA
17	16980815	16981477	663	*	Promoter (<=1kb)	462	16975999	16981353	5355	2	ENSG00000230709	ENST00000428142	0	284191	LOC284191	uncharacterized LOC284191
20	35215161	35215836	676	*	Promoter (2-3kb)	465	35218009	35218185	177	1	ENSG00000229230	ENST00000421424	-2173	NA	NA	NA
20	56606463	56606931	469	*	Distal Intergenic	465	56601701	56602113	413	1	ENSG00000214541	ENST00000398541	4762	NA	NA	NA
20	59826199	59826729	531	*	Intron (ENST00000359926/ENSG00000087495, intron 8 of 12)	465	59835853	59847711	11859	1	ENSG00000087495	ENST00000492611	-9124	116154	PHACTR3	phosphatase and actin regulator 3
X	27728131	27728769	639	*	Intron (ENST00000583068/ENSG00000189186, intron 6 of 6)	468	27746809	27748821	2013	1	ENSG00000189186	ENST00000545306	-18040	347442	DCAF8L2	DDB1 and CUL4 associated factor 8 like 2

## Sheet: 24h Hpx down Reox sensitive
seqnames	start	end	width	strand	annotation	geneChr	geneStart	geneEnd	geneLength	geneStrand	geneId	transcriptId	distanceToTSS	ENTREZID	SYMBOL	GENENAME
1	39852084	39852944	861	*	5' UTR	446	39841833	39848097	6265	2	ENSG00000043514	ENST00000465417	-3987	54802	TRIT1	tRNA isopentenyltransferase 1
1	44720905	44722379	1475	*	Promoter (<=1kb)	446	44721786	44721902	117	2	ENSG00000199377	ENST00000362507	0	26828	RNU5F-1	RNA, U5F small nuclear 1
1	64295266	64296016	751	*	Distal Intergenic	446	64220864	64267249	46386	1	ENSG00000177414	ENST00000608956	74402	148581	UBE2U	ubiquitin conjugating enzyme E2 U
1	66292913	66293318	406	*	Intron (ENST00000329654/ENSG00000184588, intron 7 of 16)	446	66257647	66266155	8509	1	ENSG00000184588	ENST00000491340	35266	5142	PDE4B	phosphodiesterase 4B
1	72462189	72462893	705	*	Exon (ENST00000653965/ENSG00000286863, exon 2 of 7)	446	72533764	72583443	49680	1	ENSG00000286863	ENST00000662505	-70871	NA	NA	NA
1	109644657	109645159	503	*	Distal Intergenic	446	109651370	109652099	730	1	ENSG00000235045	ENST00000411964	-6211	NA	NA	NA
1	109678241	109679195	955	*	Intron (ENST00000442650/ENSG00000213366, intron 7 of 8)	446	109670659	109675079	4421	1	ENSG00000213366	ENST00000496578	7582	2946	GSTM2	glutathione S-transferase mu 2
1	184947542	184948088	547	*	Intron (ENST00000367511/ENSG00000135842, intron 1 of 13)	446	184791032	184974508	183477	2	ENSG00000135842	ENST00000367511	26420	116496	NIBAN1	niban apoptosis regulator 1
1	218679203	218679794	592	*	Distal Intergenic	446	218541690	218541899	210	2	ENSG00000212610	ENST00000391308	-137304	NA	NA	NA
1	234369652	234370165	514	*	Promoter (2-3kb)	446	234372186	234372811	626	1	ENSG00000273367	ENST00000610233	-2021	NA	NA	NA
2	9010834	9011326	493	*	Distal Intergenic	447	8873108	9003709	130602	2	ENSG00000143797	ENST00000477073	-7125	129642	MBOAT2	membrane bound O-acyltransferase domain containing 2
2	43463230	43463670	441	*	Promoter (<=1kb)	447	43344157	43463259	119103	2	ENSG00000115970	ENST00000485353	0	63892	THADA	THADA armadillo repeat containing
2	72271802	72272284	483	*	Intron (ENST00000272427/ENSG00000144036, intron 20 of 21)	447	72179173	72263437	84265	2	ENSG00000144036	ENST00000492257	-8365	23233	EXOC6B	exocyst complex component 6B
2	127830774	127831484	711	*	Promoter (<=1kb)	447	127829747	127829852	106	2	ENSG00000200390	ENST00000363520	-922	NA	NA	NA
2	127932215	127933062	848	*	Promoter (<=1kb)	447	127931327	127931440	114	1	ENSG00000204399	ENST00000423267	888	NA	NA	NA
2	149768194	149768887	694	*	Intron (ENST00000449714/ENSG00000231969, intron 2 of 2)	447	149847909	149957711	109803	1	ENSG00000231969	ENST00000657556	-79022	101929231	MMADHC-DT	MMADHC divergent transcript
2	150174035	150175325	1291	*	Promoter (2-3kb)	447	150171423	150301080	129658	1	ENSG00000230645	ENST00000437118	2612	NA	NA	NA
2	160379289	160379704	416	*	Intron (ENST00000474820/ENSG00000153250, intron 2 of 15)	447	160272152	160367526	95375	2	ENSG00000153250	ENST00000392753	-11763	5937	RBMS1	RNA binding motif single stranded interacting protein 1
2	172255805	172256393	589	*	Intron (ENST00000667725/ENSG00000232555, intron 2 of 4)	447	172234230	172237223	2994	1	ENSG00000288048	ENST00000662764	21575	NA	NA	NA
2	184178073	184179018	946	*	Intron (ENST00000652637/ENSG00000286152, intron 2 of 5)	447	184049467	184187573	138107	2	ENSG00000286152	ENST00000652637	8555	NA	NA	NA
2	185284424	185285209	786	*	Distal Intergenic	447	185425063	185505608	80546	1	ENSG00000286797	ENST00000655441	-139854	NA	NA	NA
2	188280652	188281378	727	*	Intron (ENST00000434418/ENSG00000231689, intron 1 of 3)	447	188276732	188276844	113	2	ENSG00000200650	ENST00000363780	-3808	NA	NA	NA
2	233756526	233757274	749	*	Promoter (1-2kb)	447	233754305	233755345	1041	2	ENSG00000178836	ENST00000421868	-1181	100286922	LOC100286922	DnaJ heat shock protein family (Hsp40) member B3 pseudogene
3	17515299	17516186	888	*	Intron (ENST00000253692/ENSG00000131374, intron 2 of 21)	448	17465150	17465510	361	1	ENSG00000227309	ENST00000449897	50149	NA	NA	NA
3	27424732	27425279	548	*	Promoter (<=1kb)	448	27421672	27424502	2831	2	ENSG00000033867	ENST00000491211	-230	9497	SLC4A7	solute carrier family 4 member 7
3	33318153	33319019	867	*	Intron (ENST00000498807/ENSG00000153558, intron 3 of 7)	448	33289669	33373303	83635	1	ENSG00000153558	ENST00000464164	28484	25827	FBXL2	F-box and leucine rich repeat protein 2
3	35224576	35225657	1082	*	Distal Intergenic	448	35215705	35217149	1445	2	ENSG00000228767	ENST00000413425	-7427	NA	NA	NA
3	54307671	54308401	731	*	Intron (ENST00000415676/ENSG00000157445, intron 3 of 38)	448	54272774	54320541	47768	1	ENSG00000157445	ENST00000478466	34897	55799	CACNA2D3	calcium voltage-gated channel auxiliary subunit alpha2delta 3
3	63976610	63977087	478	*	Intron (ENST00000674280/ENSG00000163635, intron 5 of 12)	448	63982187	63988474	6288	1	ENSG00000163635	ENST00000466529	-5100	6314	ATXN7	ataxin 7
3	78701438	78702091	654	*	Intron (ENST00000464233/ENSG00000169855, intron 8 of 30)	448	78692888	78714520	21633	2	ENSG00000169855	ENST00000488735	12429	6091	ROBO1	roundabout guidance receptor 1
3	100888749	100889353	605	*	Intron (ENST00000471714/ENSG00000154175, intron 4 of 67)	448	100862311	100885578	23268	2	ENSG00000154175	ENST00000483129	-3171	25890	ABI3BP	ABI family member 3 binding protein
3	106424995	106425418	424	*	Promoter (2-3kb)	448	106367979	106427977	59999	2	ENSG00000286854	ENST00000653375	2559	NA	NA	NA
3	149643053	149643908	856	*	Intron (ENST00000360632/ENSG00000018408, intron 2 of 6)	448	149648997	149650184	1188	2	ENSG00000241985	ENST00000463167	6276	NA	NA	NA
3	160577598	160578177	580	*	Distal Intergenic	448	160584945	160585787	843	1	ENSG00000242285	ENST00000490136	-6768	NA	NA	NA
3	160869714	160870273	560	*	Promoter (<=1kb)	448	160870598	161069844	199247	1	ENSG00000163590	ENST00000480117	-325	151742	PPM1L	protein phosphatase, Mg2+/Mn2+ dependent 1L
3	171897809	171898450	642	*	Promoter (2-3kb)	448	171900511	171938062	37552	1	ENSG00000186329	ENST00000469981	-2061	2965-07-11	TMEM212	transmembrane protein 212
3	177946930	177947526	597	*	Distal Intergenic	448	177934823	177937662	2840	1	ENSG00000225790	ENST00000450500	12107	NA	NA	NA
3	178146348	178146952	605	*	Intron (ENST00000651726/ENSG00000286003, intron 1 of 3)	448	178028130	178172449	144320	2	ENSG00000286003	ENST00000651726	25497	NA	NA	NA
4	39035914	39036684	771	*	Promoter (2-3kb)	449	38993735	39032922	39188	2	ENSG00000121895	ENST00000344606	-2992	80008	TMEM156	transmembrane protein 156
4	39990908	39991650	743	*	Distal Intergenic	449	39898014	39977956	79943	2	ENSG00000121892	ENST00000503396	-12952	23244	PDS5A	PDS5 cohesin associated factor A
4	40022370	40023016	647	*	Promoter (2-3kb)	449	40020240	40021517	1278	1	ENSG00000249064	ENST00000508931	2130	NA	NA	NA
4	47278010	47278707	698	*	Intron (ENST00000295454/ENSG00000163288, intron 4 of 8)	449	47431960	47438959	7000	1	ENSG00000260918	ENST00000562284	-153253	NA	NA	NA
4	71609656	71610027	372	*	Distal Intergenic	449	71741708	71754478	12771	2	ENSG00000145321	ENST00000503364	144451	2638	GC	GC vitamin D binding protein
4	73891726	73892444	719	*	Distal Intergenic	449	73869393	73871308	1916	1	ENSG00000163739	ENST00000395761	22333	2919	CXCL1	C-X-C motif chemokine ligand 1
4	74056522	74057473	952	*	Promoter (1-2kb)	449	74054038	74055399	1362	2	ENSG00000248848	ENST00000513150	-1123	10895	PPBPP2	pro-platelet basic protein pseudogene 2
4	173236691	173237590	900	*	Intron (ENST00000512285/ENSG00000109586, intron 1 of 5)	449	173268160	173268233	74	1	ENSG00000221296	ENST00000408369	-30570	100422849	MIR548T	microRNA 548t
4	184401404	184401791	388	*	Intron (ENST00000393593/ENSG00000168310, intron 6 of 8)	449	184389022	184418590	29569	2	ENSG00000168310	ENST00000505067	16799	3660	IRF2	interferon regulatory factor 2
5	39755837	39756379	543	*	Distal Intergenic	450	39718984	39721513	2530	2	ENSG00000250492	ENST00000504674	-34324	NA	NA	NA
5	58649575	58650403	829	*	Intron (ENST00000282878/ENSG00000152932, intron 2 of 4)	450	58644364	58794531	150168	1	ENSG00000152932	ENST00000507977	5211	115827	RAB3C	RAB3C, member RAS oncogene family
5	61397277	61397610	334	*	Intron (ENST00000252744/ENSG00000130449, intron 1 of 13)	450	61390668	61391871	1204	2	ENSG00000213891	ENST00000474162	-5406	NA	NA	NA
5	64965187	64966712	1526	*	Intron (ENST00000381070/ENSG00000153015, intron 11 of 13)	450	65020038	65020551	514	1	ENSG00000272370	ENST00000607786	-53326	NA	NA	NA
5	65393973	65394710	738	*	Intron (ENST00000381055/ENSG00000049192, intron 7 of 24)	450	65415353	65416222	870	1	ENSG00000205644	ENST00000478174	-20643	NA	NA	NA
5	68505800	68506797	998	*	Downstream (1-2kb)	450	68523878	68530007	6130	1	ENSG00000249588	ENST00000515504	-17081	NA	NA	NA
5	90534900	90535490	591	*	Intron (ENST00000508842/ENSG00000164199, intron 1 of 3)	450	90519433	90529584	10152	2	ENSG00000176018	ENST00000453259	-5316	116068	LYSMD3	LysM domain containing 3
5	94699532	94699877	346	*	Intron (ENST00000493934/ENSG00000133302, intron 1 of 2)	450	94692186	94739436	47251	1	ENSG00000133302	ENST00000493934	7346	84250	SLF1	SMC5-SMC6 complex localization factor 1
5	123881726	123882432	707	*	Distal Intergenic	450	123636110	123637403	1294	1	ENSG00000235275	ENST00000510337	245616	NA	NA	NA
5	125027001	125027788	788	*	Intron (ENST00000647105/ENSG00000260192, intron 1 of 6)	450	125036638	125150729	114092	1	ENSG00000260192	ENST00000512965	-8850	101927460	LINC02240	long intergenic non-protein coding RNA 2240
5	168061648	168062437	790	*	Exon (ENST00000518659/ENSG00000145934, exon 7 of 29)	450	168033091	168033205	115	2	ENSG00000253065	ENST00000517256	-28443	NA	NA	NA
5	168128488	168129039	552	*	Promoter (<=1kb)	450	168128856	168130422	1567	1	ENSG00000279739	ENST00000624423	0	NA	NA	NA
6	35046885	35047672	788	*	Intron (ENST00000360359/ENSG00000064999, intron 11 of 23)	451	35041116	35058015	16900	2	ENSG00000286550	ENST00000660796	10343	NA	NA	NA
6	63496213	63496888	676	*	Distal Intergenic	451	63480134	63481876	1743	1	ENSG00000225121	ENST00000444820	16079	NA	NA	NA
6	78484493	78485036	544	*	Distal Intergenic	451	78604467	78606036	1570	2	ENSG00000230309	ENST00000449463	121000	NA	NA	NA
6	90000100	90000601	502	*	Promoter (<=1kb)	451	90001222	90001506	285	2	ENSG00000222078	ENST00000410146	905	NA	NA	NA
6	124481971	124482580	610	*	Intron (ENST00000368417/ENSG00000188580, intron 3 of 6)	451	124283004	124283271	268	1	ENSG00000188580	ENST00000546092	198967	154215	NKAIN2	sodium/potassium transporting ATPase interacting 2
6	130620258	130620892	635	*	Distal Intergenic	451	130573996	130574112	117	2	ENSG00000202438	ENST00000365568	-46146	NA	NA	NA
6	133309514	133310114	601	*	Intron (ENST00000452339/ENSG00000112319, intron 3 of 18)	451	133325211	133468569	143359	1	ENSG00000112319	ENST00000421413	-15097	2070	EYA4	EYA transcriptional coactivator and phosphatase 4
6	133644907	133645878	972	*	Intron (ENST00000607033/ENSG00000227954, intron 4 of 8)	451	133676729	133677429	701	2	ENSG00000218213	ENST00000406512	31551	NA	NA	NA
6	133978053	133978820	768	*	Intron (ENST00000416965/ENSG00000028839, intron 1 of 4)	451	133982817	133987499	4683	1	ENSG00000028839	ENST00000477527	-3997	9519	TBPL1	TATA-box binding protein like 1
6	137731713	137732551	839	*	Intron (ENST00000635999/ENSG00000230533, intron 2 of 2)	451	137730170	137738983	8814	2	ENSG00000234956	ENST00000411615	6432	100507406	LINC02539	long intergenic non-protein coding RNA 2539
6	143734673	143735211	539	*	Intron (ENST00000367584/ENSG00000112419, intron 2 of 11)	451	143748928	143765665	16738	1	ENSG00000112419	ENST00000420771	-13717	9749	PHACTR2	phosphatase and actin regulator 2
7	7136054	7137163	1110	*	Distal Intergenic	452	7156934	7238428	81495	1	ENSG00000106392	ENST00000429911	-19771	56913	C1GALT1	core 1 synthase, glycoprotein-N-acetylgalactosamine 3-beta-galactosyltransferase 1
7	9836564	9837317	754	*	Distal Intergenic	452	9850924	9851386	463	1	ENSG00000270611	ENST00000603806	-13607	NA	NA	NA
7	9842167	9842928	762	*	Distal Intergenic	452	9850924	9851386	463	1	ENSG00000270611	ENST00000603806	-7996	NA	NA	NA
7	37694130	37695251	1122	*	Intron (ENST00000461610/ENSG00000187037, intron 2 of 3)	452	37683872	37741374	57503	1	ENSG00000187037	ENST00000447769	10258	353345	GPR141	G protein-coupled receptor 141
7	37730430	37731101	672	*	Intron (ENST00000461610/ENSG00000187037, intron 2 of 3)	452	37740394	37741311	918	1	ENSG00000187037	ENST00000334425	-9293	353345	GPR141	G protein-coupled receptor 141
7	37732328	37732860	533	*	Intron (ENST00000461610/ENSG00000187037, intron 2 of 3)	452	37740394	37741311	918	1	ENSG00000187037	ENST00000334425	-7534	353345	GPR141	G protein-coupled receptor 141
7	46933614	46933947	334	*	Intron (ENST00000433337/ENSG00000232072, intron 2 of 2)	452	46890625	46900932	10308	2	ENSG00000232072	ENST00000424359	-32682	NA	NA	NA
7	87375603	87376531	929	*	Promoter (<=1kb)	452	87375873	87382329	6457	1	ENSG00000005469	ENST00000479014	0	54677	CROT	carnitine O-octanoyltransferase
7	88327050	88327807	758	*	Distal Intergenic	452	88270892	88306894	36003	2	ENSG00000127954	ENST00000380079	-20156	79689	STEAP4	STEAP4 metalloreductase
7	88737505	88738263	759	*	Intron (ENST00000663862/ENSG00000233420, intron 4 of 4)	452	88749470	88749694	225	1	ENSG00000227979	ENST00000421305	-11207	NA	NA	NA
7	112550469	112551182	714	*	Distal Intergenic	452	112520488	112521670	1183	1	ENSG00000182965	ENST00000343743	29981	NA	NA	NA
7	137642056	137643129	1074	*	Intron (ENST00000453654/ENSG00000157680, intron 6 of 32)	452	137391220	137690004	298785	2	ENSG00000157680	ENST00000614521	46875	9162	DGKI	diacylglycerol kinase iota
7	152735384	152736156	773	*	Distal Intergenic	452	152749079	152749735	657	1	ENSG00000214003	ENST00000397213	-12923	NA	NA	NA
8	17895789	17896500	712	*	Promoter (<=1kb)	453	17891266	17895544	4279	2	ENSG00000104760	ENST00000519055	-245	2267	FGL1	fibrinogen like 1
8	35079951	35080594	644	*	Promoter (<=1kb)	453	35080592	35093509	12918	1	ENSG00000287152	ENST00000667383	0	NA	NA	NA
8	37110800	37111443	644	*	Distal Intergenic	453	37095150	37095390	241	1	ENSG00000253650	ENST00000523647	15650	NA	NA	NA
8	49121380	49121970	591	*	Intron (ENST00000657689/ENSG00000253474, intron 1 of 5)	453	49086301	49228743	142443	1	ENSG00000253474	ENST00000657689	35079	NA	NA	NA
8	56896932	56897620	689	*	Distal Intergenic	453	56917084	56917190	107	1	ENSG00000206975	ENST00000384248	-19464	NA	NA	NA
8	58931045	58931806	762	*	Intron (ENST00000361421/ENSG00000198846, intron 3 of 8)	453	58991720	58992938	1219	2	ENSG00000254048	ENST00000518011	61132	NA	NA	NA
8	65963103	65963837	735	*	Distal Intergenic	453	66021553	66101245	79693	1	ENSG00000147570	ENST00000276570	-57716	85479	DNAJC5B	DnaJ heat shock protein family (Hsp40) member C5 beta
8	75194237	75195194	958	*	Intron (ENST00000676364/ENSG00000249395, intron 1 of 2)	453	75167704	75176656	8953	2	ENSG00000253712	ENST00000467082	-17581	NA	NA	NA
8	76580298	76580675	378	*	Promoter (<=1kb)	453	76576551	76579345	2795	2	ENSG00000253681	ENST00000524269	-953	NA	NA	NA
8	77882795	77883419	625	*	Distal Intergenic	453	78148101	78153913	5813	1	ENSG00000254001	ENST00000521879	-264682	NA	NA	NA
8	84288886	84289540	655	*	Intron (ENST00000522613/ENSG00000184672, intron 2 of 2)	453	84184941	84529464	344524	1	ENSG00000184672	ENST00000522647	103945	138046	RALYL	RALY RNA binding protein like
8	107374031	107374604	574	*	Intron (ENST00000517746/ENSG00000154188, intron 1 of 8)	453	107251512	107336522	85011	2	ENSG00000154188	ENST00000520734	-37509	284	ANGPT1	angiopoietin 1
8	114475843	114476606	764	*	Distal Intergenic	453	114318400	114318911	512	2	ENSG00000253499	ENST00000518851	-156932	NA	NA	NA
8	118974646	118975691	1046	*	Promoter (<=1kb)	453	118976513	118976619	107	1	ENSG00000207334	ENST00000384604	-822	NA	NA	NA
9	18060053	18060772	720	*	Intron (ENST00000636209/ENSG00000178031, intron 1 of 3)	454	17906563	18533292	626730	1	ENSG00000178031	ENST00000636209	153490	92949	ADAMTSL1	ADAMTS like 1
9	33619626	33619944	319	*	Promoter (1-2kb)	454	33617762	33618506	745	1	ENSG00000205274	ENST00000379435	1864	NA	NA	NA
9	126802179	126802689	511	*	Promoter (2-3kb)	454	126805006	126838210	33205	1	ENSG00000169155	ENST00000449886	-2317	23099	ZBTB43	zinc finger and BTB domain containing 43
10	5020168	5020642	475	*	Promoter (2-3kb)	455	5005995	5018031	12037	2	ENSG00000151632	ENST00000604428	-2137	1646	AKR1C2	aldo-keto reductase family 1 member C2
10	5032931	5034057	1127	*	Promoter (1-2kb)	455	5035354	5102210	66857	1	ENSG00000196139	ENST00000605781	-1297	8644	AKR1C3	aldo-keto reductase family 1 member C3
10	32950633	32951137	505	*	Intron (ENST00000609742/ENSG00000150093, intron 1 of 15)	455	32928150	32955663	27514	2	ENSG00000150093	ENST00000480226	4526	3688	ITGB1	integrin subunit beta 1
10	61153510	61154189	680	*	Distal Intergenic	455	61016275	61026420	10146	1	ENSG00000227244	ENST00000417931	137235	100507058	LINC00845	long intergenic non-protein coding RNA 845
10	74432941	74433615	675	*	Intron (ENST00000672429/ENSG00000156110, intron 6 of 9)	455	74423435	74424014	580	2	ENSG00000213731	ENST00000395972	-8927	NA	NA	NA
10	111867471	111868169	699	*	Intron (ENST00000656217/ENSG00000287231, intron 2 of 2)	455	111787233	111989909	202677	2	ENSG00000287231	ENST00000656217	121740	NA	NA	NA
12	20018267	20019110	844	*	Intron (ENST00000536666/ENSG00000256287, intron 1 of 2)	457	20014780	20098868	84089	1	ENSG00000256287	ENST00000536666	3487	100506393	LINC02398	long intergenic non-protein coding RNA 2398
12	26032700	26033132	433	*	Intron (ENST00000381352/ENSG00000123094, intron 2 of 5)	457	26021440	26064762	43323	1	ENSG00000123094	ENST00000542315	11260	11228	RASSF8	Ras association domain family member 8
12	42729378	42729877	500	*	Distal Intergenic	457	42693824	42717117	23294	1	ENSG00000257114	ENST00000655248	35554	105369739	LINC02450	long intergenic non-protein coding RNA 2450
12	71315453	71316108	656	*	Promoter (<=1kb)	457	71157748	71315756	158009	2	ENSG00000127324	ENST00000549421	0	7103	TSPAN8	tetraspanin 8
12	88720619	88721572	954	*	Distal Intergenic	457	88601862	88602195	334	1	ENSG00000278011	ENST00000612250	118757	NA	NA	NA
12	122459137	122459651	515	*	Distal Intergenic	457	122472893	122478533	5641	2	ENSG00000033030	ENST00000538116	18882	55596	ZCCHC8	zinc finger CCHC-type containing 8
13	57888981	57889966	986	*	Distal Intergenic	458	57991350	57991464	115	1	ENSG00000202422	ENST00000365552	-101384	NA	NA	NA
13	69856207	69856768	562	*	Intron (ENST00000545028/ENSG00000150361, intron 4 of 9)	458	69894101	69895085	985	2	ENSG00000232314	ENST00000458195	38317	NA	NA	NA
13	90839010	90839822	813	*	Distal Intergenic	458	90781766	90781869	104	2	ENSG00000251753	ENST00000515944	-57141	NA	NA	NA
14	26811576	26812350	775	*	Promoter (<=1kb)	459	26810673	26820650	9978	1	ENSG00000257185	ENST00000664061	903	102724890	LINC02293	long intergenic non-protein coding RNA 2293
14	30610531	30611381	851	*	Promoter (<=1kb)	459	30611302	30618232	6931	1	ENSG00000092140	ENST00000549159	0	55632	G2E3	G2/M-phase specific E3 ubiquitin protein ligase
14	36822177	36822968	792	*	Intron (ENST00000557642/ENSG00000258601, intron 1 of 1)	459	36808871	36828729	19859	1	ENSG00000258601	ENST00000557642	13306	NA	NA	NA
14	37900447	37900932	486	*	Promoter (1-2kb)	459	37896060	37902124	6065	2	ENSG00000259091	ENST00000554257	1192	400208	LINC00517	long intergenic non-protein coding RNA 517
14	52823716	52824317	602	*	Intron (ENST00000654071/ENSG00000285664, intron 1 of 3)	459	52792875	52820034	27160	2	ENSG00000258698	ENST00000554548	-3682	NA	NA	NA
14	63078519	63079166	648	*	Intron (ENST00000394968/ENSG00000140015, intron 1 of 10)	459	62712240	63101866	389627	2	ENSG00000140015	ENST00000394968	22700	27133	KCNH5	potassium voltage-gated channel subfamily H member 5
15	36495389	36496069	681	*	Distal Intergenic	460	36443537	36471016	27480	2	ENSG00000259737	ENST00000558875	-24373	NA	NA	NA
15	44977777	44978422	646	*	Intron (ENST00000340827/ENSG00000167014, intron 6 of 6)	460	44973558	44973661	104	1	ENSG00000252288	ENST00000516479	4219	NA	NA	NA
15	65304594	65305612	1019	*	Promoter (<=1kb)	460	65304677	65304792	116	1	ENSG00000200156	ENST00000363286	0	26832	RNU5B-1	RNA, U5B small nuclear 1
16	51722876	51723918	1043	*	Distal Intergenic	461	51755325	51788208	32884	1	ENSG00000260057	ENST00000667113	-31407	NA	NA	NA
16	61944008	61944366	359	*	Intron (ENST00000577730/ENSG00000150394, intron 1 of 11)	461	61901392	61918714	17323	2	ENSG00000150394	ENST00000577228	-25294	1006	CDH8	cadherin 8
17	8681082	8681897	816	*	Distal Intergenic	462	8474212	8630761	156550	2	ENSG00000133026	ENST00000269243	-50321	4628	MYH10	myosin heavy chain 10
18	59484394	59485482	1089	*	Intron (ENST00000439986/ENSG00000183287, intron 2 of 10)	463	59430940	59480240	49301	2	ENSG00000183287	ENST00000398179	-4154	147372	CCBE1	collagen and calcium binding EGF domains 1
18	73784980	73786049	1070	*	Distal Intergenic	463	73744935	73745232	298	1	ENSG00000241866	ENST00000470065	40045	NA	NA	NA
20	33724416	33724841	426	*	Distal Intergenic	465	33707269	33720319	13051	2	ENSG00000101417	ENST00000344022	-4097	11264	PXMP4	peroxisomal membrane protein 4
20	52953060	52953543	484	*	Distal Intergenic	465	52972358	53495330	522973	1	ENSG00000182463	ENST00000371497	-18815	128553	TSHZ2	teashirt zinc finger homeobox 2
21	20789777	20790550	774	*	Intron (ENST00000669643/ENSG00000224924, intron 1 of 7)	466	20742611	20778619	36009	2	ENSG00000224924	ENST00000653294	-11158	387486	LINC00320	long intergenic non-protein coding RNA 320
21	28587450	28588277	828	*	Intron (ENST00000433310/ENSG00000232855, intron 2 of 4)	466	28431159	28577380	146222	2	ENSG00000232855	ENST00000659279	-10070	NA	NA	NA
22	45698801	45699497	697	*	Intron (ENST00000381061/ENSG00000130638, intron 2 of 10)	467	45703973	45738839	34867	1	ENSG00000130638	ENST00000476998	-4476	25814	ATXN10	ataxin 10
X	118152175	118152703	529	*	Distal Intergenic	468	118146063	118146561	499	1	ENSG00000234524	ENST00000420608	6112	NA	NA	NA
X	138853938	138854634	697	*	Intron (ENST00000441825/ENSG00000129682, intron 3 of 6)	468	138806374	138807091	718	1	ENSG00000235975	ENST00000433780	47564	NA	NA	NA
X	141924082	141924947	866	*	Distal Intergenic	468	141934496	142740581	806086	1	ENSG00000288098	ENST00000664519	-9549	NA	NA	NA
X	149641527	149642402	876	*	Distal Intergenic	468	149649174	149650124	951	2	ENSG00000229322	ENST00000456494	7722	NA	NA	NA

## Sheet: 24h down Reox insensitive
seqnames	start	end	width	strand	annotation	geneChr	geneStart	geneEnd	geneLength	geneStrand	geneId	transcriptId	distanceToTSS	ENTREZID	SYMBOL	GENENAME
1	173862137	173862891	755	*	Promoter (<=1kb)	446	173862473	173863941	1469	1	ENSG00000270084	ENST00000602767	0	NA	NA	NA
1	185541764	185542542	779	*	Distal Intergenic	446	185518651	185520986	2336	1	ENSG00000279401	ENST00000622958	23113	NA	NA	NA
1	210373208	210374917	1710	*	Promoter (<=1kb)	446	210374154	210374267	114	2	ENSG00000200972	ENST00000364102	0	NA	NA	NA
2	188495884	188496504	621	*	Intron (ENST00000409843/ENSG00000144366, intron 4 of 12)	447	188522738	188584309	61572	1	ENSG00000144366	ENST00000476422	-26234	51454	GULP1	GULP PTB domain containing engulfment adaptor 1
3	89267815	89268467	653	*	Intron (ENST00000336596/ENSG00000044524, intron 3 of 16)	448	89283016	89314604	31589	2	ENSG00000285780	ENST00000650616	46137	NA	NA	NA
3	151770063	151770612	550	*	Promoter (<=1kb)	448	151770428	151773952	3525	1	ENSG00000240602	ENST00000471766	0	201651	AADACP1	arylacetamide deacetylase pseudogene 1
4	87187999	87188524	526	*	Intron (ENST00000273963/ENSG00000145332, intron 2 of 9)	449	87207092	87208086	995	1	ENSG00000248180	ENST00000513846	-18568	NA	NA	NA
4	119099149	119099761	613	*	Distal Intergenic	449	119135832	119187789	51958	1	ENSG00000172399	ENST00000307128	-36071	51778	MYOZ2	myozenin 2
5	41883759	41884498	740	*	Distal Intergenic	450	41895068	41895599	532	1	ENSG00000240281	ENST00000494052	-10570	NA	NA	NA
5	90119349	90120063	715	*	Distal Intergenic	450	90016621	90016720	100	2	ENSG00000264342	ENST00000584845	-102629	100500825	MIR3660	microRNA 3660
7	84647638	84648342	705	*	Distal Intergenic	452	84549206	84584322	35117	1	ENSG00000235139	ENST00000446000	98432	101927378	LOC101927378	uncharacterized LOC101927378
8	5066118	5066873	756	*	Distal Intergenic	453	5072645	5072869	225	2	ENSG00000253262	ENST00000518519	5996	NA	NA	NA
8	27399757	27400385	629	*	Promoter (2-3kb)	453	27397452	27459386	61935	1	ENSG00000120899	ENST00000517339	2305	2185	PTK2B	protein tyrosine kinase 2 beta
8	74405974	74406747	774	*	Intron (ENST00000674710/ENSG00000104381, intron 5 of 7)	453	74376687	74376793	107	1	ENSG00000207417	ENST00000384686	29287	NA	NA	NA
8	120286810	120287579	770	*	Intron (ENST00000297848/ENSG00000187955, intron 33 of 47)	453	120250747	120372027	121281	1	ENSG00000187955	ENST00000247781	36063	7373	COL14A1	collagen type XIV alpha 1 chain
9	12794015	12794607	593	*	Intron (ENST00000319264/ENSG00000153714, intron 1 of 1)	454	12775668	12777578	1911	1	ENSG00000153714	ENST00000489107	18347	286343	LURAP1L	leucine rich adaptor protein 1 like
9	18038700	18039385	686	*	Intron (ENST00000636209/ENSG00000178031, intron 1 of 3)	454	17906563	18533292	626730	1	ENSG00000178031	ENST00000636209	132137	92949	ADAMTSL1	ADAMTS like 1
12	22477167	22477789	623	*	Promoter (<=1kb)	457	22470897	22477338	6442	2	ENSG00000111731	ENST00000537643	0	9847	C2CD5	C2 calcium dependent domain containing 5
12	64818141	64818799	659	*	Exon (ENST00000456757/ENSG00000111490, exon 4 of 4)	457	64824647	64881033	56387	1	ENSG00000111490	ENST00000539867	-5848	23329	TBC1D30	TBC1 domain family member 30
15	47293430	47294244	815	*	Intron (ENST00000558014/ENSG00000137872, intron 1 of 19)	460	47274183	47275164	982	1	ENSG00000259554	ENST00000561254	19247	NA	NA	NA
17	43272601	43273000	400	*	Promoter (<=1kb)	462	43273101	43273292	192	2	ENSG00000278774	ENST00000613956	292	NA	NA	NA
18	10738916	10739706	791	*	3' UTR	463	10737663	10748500	10838	2	ENSG00000154864	ENST00000579949	8794	63895	PIEZO2	piezo type mechanosensitive ion channel component 2
18	31247597	31248247	651	*	Distal Intergenic	463	31318160	31359246	41087	1	ENSG00000134760	ENST00000257192	-69913	1828	DSG1	desmoglein 1
20	17542948	17543675	728	*	Intron (ENST00000377868/ENSG00000125864, intron 1 of 7)	465	17493905	17531379	37475	2	ENSG00000125864	ENST00000377873	-11569	631	BFSP1	beaded filament structural protein 1
