# Supplementary material for: Regulation of chromatin accessibility by hypoxia and HIF
Source: Biochem J. 2022 Mar 28;479(6):767–86. doi: 10.1042/BCJ20220008 (PMC9022986; doi:10.1042/BCJ20220008)
Supplement: Supplementary Material 8 [file BCJ-479-767-s8.pdf]

## Sheet: 24h Hpx and VH298 up
seqnames	start	end	width	strand
1	12593555	12594053	499	*
1	20411098	20411891	794	*
1	69947839	69948604	766	*
1	159910148	159910822	675	*
1	202084854	202085733	880	*
1	203037990	203038804	815	*
1	217660234	217661084	851	*
1	221025819	221026464	646	*
2	460745	461475	731	*
2	18535861	18536696	836	*
2	84945879	84946997	1119	*
2	115624169	115624891	723	*
2	207394382	207395787	1406	*
2	234111266	234112041	776	*
3	8509942	8510351	410	*
3	20622142	20622852	711	*
3	24254484	24255165	682	*
3	71989067	71989606	540	*
3	122969507	122970564	1058	*
3	122977563	122978513	951	*
3	129586661	129588186	1526	*
4	42927884	42928692	809	*
5	458650	459378	729	*
5	1548166	1548573	408	*
5	1568187	1569240	1054	*
5	26579594	26580213	620	*
5	116763886	116764398	513	*
5	168765465	168766261	797	*
5	170614732	170615697	966	*
6	3282156	3282644	489	*
6	5082475	5083126	652	*
6	43667220	43668888	1669	*
6	43923351	43923998	648	*
6	159578670	159579169	500	*
7	1124846	1125339	494	*
7	27277529	27278096	568	*
7	55185946	55186842	897	*
7	70598982	70599566	585	*
7	96954017	96954480	464	*
7	130180588	130181287	700	*
7	138752398	138753121	724	*
7	140230408	140231767	1360	*
7	140626251	140626898	648	*
7	155830045	155830558	514	*
8	129508308	129509007	700	*
8	133036831	133037329	499	*
8	133206943	133207302	360	*
8	133216236	133217548	1313	*
8	133217753	133218409	657	*
8	133227541	133228776	1236	*
8	133320434	133321043	610	*
8	133363012	133363657	646	*
9	2427273	2428116	844	*
9	4832901	4833567	667	*
9	16246675	16247830	1156	*
9	19161559	19162310	752	*
9	35673354	35674552	1199	*
10	35789819	35790364	546	*
10	95406717	95407330	614	*
10	103777069	103777867	799	*
10	132208180	132209554	1375	*
12	32943903	32944626	724	*
12	54431962	54433102	1141	*
12	120474621	120475059	439	*
12	131901887	131902778	892	*
13	20378571	20379115	545	*
14	34035242	34036308	1067	*
14	34231515	34232052	538	*
14	50542700	50543476	777	*
14	64721310	64721895	586	*
14	68535204	68536131	928	*
15	59919300	59920012	713	*
15	86362487	86363121	635	*
15	90126512	90127437	926	*
15	99029035	99029794	760	*
15	101613366	101613921	556	*
15	101615579	101616553	975	*
16	80006191	80007642	1452	*
16	84247367	84248503	1137	*
16	89067527	89068339	813	*
17	12902528	12903118	591	*
17	40312074	40312680	607	*
18	11676827	11677338	512	*
19	2086960	2087555	596	*
19	2089698	2090679	982	*
19	3828337	3829010	674	*
19	15072839	15073572	734	*
19	18225811	18226451	641	*
20	45087839	45088786	948	*
20	57810774	57811345	572	*
21	41165220	41165740	521	*
22	30562305	30562877	573	*
22	43126537	43127988	1452	*

## Sheet: 24h Hpx and VH298 down
seqnames	start	end	width	strand
1	72462160	72462893	734	*
2	233756526	233757423	898	*
5	90119343	90120086	744	*
13	90839003	90839822	820	*
14	30610465	30611409	945	*
15	47293361	47294244	884	*

## Sheet: ATAC up at Hpx RNA up genes
ensembl gene name	ensembl gene id
ENSG00000107159	CA9
ENSG00000131759	RARA
ENSG00000177169	ULK1
ENSG00000004399	PLXND1
ENSG00000172081	MOB3A
ENSG00000119950	MXI1
ENSG00000104419	NDRG1
ENSG00000219607	PPP1R3G
ENSG00000236404	VLDLR-AS1
ENSG00000105650	PDE4C
ENSG00000105929	ATP6V0A4
ENSG00000129521	EGLN3
ENSG00000007264	MATK
ENSG00000143847	PPFIA4
ENSG00000227036	LINC00511
ENSG00000280719	PCAT5
