# Supplementary material for: Regulation of chromatin accessibility by hypoxia and HIF
Source: Biochem J. 2022 Mar 28;479(6):767–86. doi: 10.1042/BCJ20220008 (PMC9022986; doi:10.1042/BCJ20220008)
Supplement: Supplementary Material 9 [file BCJ-479-767-s9.pdf]

## Sheet: a549_atac
seqnames	start	end	width	strand	name	score	sigValue	pvalue	qvalue	peak	annotation	geneChr	geneStart	geneEnd	geneLength	geneStrand	geneId	transcriptId	distanceToTSS	ENTREZID	SYMBOL	GENENAME
19	36114425	36116227	1803	*	.	1000	14.6729	10454.5	10447.6	927	Promoter (<=1kb)	464	36115439	36118560	3122	1	ENSG00000105254	ENST00000629269	0	1155	TBCB	tubulin folding cofactor B
19	42267865	42269326	1462	*	.	1000	12.1726	10157.7	10151	1106	Promoter (<=1kb)	464	42268537	42295796	27260	1	ENSG00000079432	ENST00000572681	0	23152	CIC	capicua transcriptional repressor
7	134316208	134317499	1292	*	.	1000	20.7795	9807.53	9800.88	830	Promoter (<=1kb)	452	134289332	134316930	27599	2	ENSG00000205060	ENST00000378509	0	84912	SLC35B4	solute carrier family 35 member B4
19	33176230	33178054	1825	*	.	1000	12.7893	9755.98	9749.34	980	Promoter (<=1kb)	464	33177603	33205291	27689	1	ENSG00000130881	ENST00000592484	0	4037	LRP3	LDL receptor related protein 3
19	39970316	39971653	1338	*	.	1000	19.0771	9709.84	9703.21	735	Promoter (<=1kb)	464	39971165	39981764	10600	1	ENSG00000013275	ENST00000157812	0	5704	PSMC4	proteasome 26S subunit, ATPase 4
19	42075140	42076476	1337	*	.	1000	17.6325	9484.69	9478.12	865	Promoter (<=1kb)	464	42076166	42081552	5387	1	ENSG00000105732	ENST00000359044	0	64763	ZNF574	zinc finger protein 574
19	35757376	35758812	1437	*	.	1000	16.2931	9099.96	9093.5	632	Promoter (<=1kb)	464	35755639	35758079	2441	2	ENSG00000004776	ENST00000592984	0	126393	HSPB6	heat shock protein family B (small) member 6
19	35702083	35703164	1082	*	.	1000	20.1722	8976.97	8970.56	412	Promoter (1-2kb)	464	35704558	35717038	12481	1	ENSG00000011590	ENST00000392197	-1394	27033	ZBTB32	zinc finger and BTB domain containing 32
2	54723074	54724191	1118	*	.	1000	18.6969	8868.44	8862.06	387	Promoter (<=1kb)	447	54723499	54972018	248520	1	ENSG00000214595	ENST00000673912	0	400954	EML6	EMAP like 6
19	27793027	27794749	1723	*	.	1000	15.2812	8765.84	8759.51	921	Promoter (<=1kb)	464	27681072	27793138	112067	2	ENSG00000261824	ENST00000666409	0	148189	LINC00662	long intergenic non-protein coding RNA 662
2	64750603	64752115	1513	*	.	1000	12.9028	8572.88	8566.62	510	Promoter (<=1kb)	447	64636533	64751005	114473	2	ENSG00000179833	ENST00000476805	0	9792	SERTAD2	SERTA domain containing 2
17	82458015	82459312	1298	*	.	1000	20.6949	8525.64	8519.4	577	Promoter (<=1kb)	462	82458180	82468799	10620	1	ENSG00000141562	ENST00000579198	0	26502	NARF	nuclear prelamin A recognition factor
1	16612610	16614061	1452	*	.	1000	18.4946	8470.41	8464.19	993	Promoter (<=1kb)	446	16562319	16613487	51169	2	ENSG00000219481	ENST00000430580	0	55672	NBPF1	NBPF member 1
14	20342479	20343833	1355	*	.	1000	18.3645	8465.59	8459.38	827	Promoter (<=1kb)	459	20343615	20357904	14290	1	ENSG00000129484	ENST00000250416	0	10038	PARP2	poly(ADP-ribose) polymerase 2
19	42396415	42397688	1274	*	.	1000	14.9902	8447.6	8441.4	662	Promoter (<=1kb)	464	42397114	42408452	11339	1	ENSG00000213904	ENST00000593491	0	100996307	LIPE-AS1	LIPE antisense RNA 1
1	184754127	184755730	1604	*	.	1000	17.6911	8422.41	8416.22	863	Promoter (<=1kb)	446	184690237	184754858	64622	2	ENSG00000116406	ENST00000318130	0	80267	EDEM3	ER degradation enhancing alpha-mannosidase like protein 3
19	40777241	40778982	1742	*	.	1000	11.9156	8362.74	8356.58	810	Promoter (<=1kb)	464	40778216	40792572	14357	1	ENSG00000167578	ENST00000594800	0	53916	RAB4B	RAB4B, member RAS oncogene family
16	29453713	29455244	1532	*	.	1000	14.1975	8358.48	8352.32	782	Promoter (<=1kb)	461	29454501	29458219	3719	1	ENSG00000181625	ENST00000330181	0	79008	SLX1B	SLX1 homolog B, structure-specific endonuclease subunit
5	75336184	75337886	1703	*	.	1000	17.2942	8313.21	8307.07	811	Promoter (<=1kb)	450	75336329	75360758	24430	1	ENSG00000113161	ENST00000511206	0	3156	HMGCR	3-hydroxy-3-methylglutaryl-CoA reductase
2	62705007	62706687	1681	*	.	1000	14.7499	8271.89	8265.76	630	Promoter (<=1kb)	447	62705652	62764336	58685	1	ENSG00000115504	ENST00000427809	0	23301	EHBP1	EH domain binding protein 1
19	35628316	35629665	1350	*	.	1000	22.7076	8220.15	8214.04	566	Promoter (<=1kb)	464	35629030	35637686	8657	1	ENSG00000126254	ENST00000588161	0	79171	RBM42	RNA binding motif protein 42
7	134646481	134647403	923	*	.	1000	22.081	8179.94	8173.85	249	Promoter (<=1kb)	452	134646811	134679808	32998	1	ENSG00000172331	ENST00000418040	0	669	BPGM	bisphosphoglycerate mutase
5	146202968	146204080	1113	*	.	1000	22.4769	8179.33	8173.24	534	Promoter (<=1kb)	450	146203605	146289223	85619	1	ENSG00000091009	ENST00000265271	0	54439	RBM27	RNA binding motif protein 27
17	4966781	4968314	1534	*	.	1000	13.2681	8158.54	8152.46	653	Promoter (<=1kb)	462	4959226	4967790	8565	2	ENSG00000091640	ENST00000575142	0	9552	SPAG7	sperm associated antigen 7
19	42242485	42243480	996	*	.	1000	9.60869	8024.66	8018.64	761	Promoter (<=1kb)	464	42230190	42242602	12413	2	ENSG00000105723	ENST00000222330	0	2931	GSK3A	glycogen synthase kinase 3 alpha
12	53078765	53080039	1275	*	.	1000	19.2528	8020.46	8014.43	719	Promoter (<=1kb)	457	53064316	53079390	15075	2	ENSG00000167778	ENST00000301463	0	84926	SPRYD3	SPRY domain containing 3
1	151281073	151283090	2018	*	.	1000	14.4582	7965.89	7959.88	1063	Promoter (<=1kb)	446	151281618	151286705	5088	1	ENSG00000143373	ENST00000443959	0	57592	ZNF687	zinc finger protein 687
16	30193060	30194764	1705	*	.	1000	13.7663	7962.63	7956.63	780	Promoter (<=1kb)	461	30193875	30197561	3687	1	ENSG00000132207	ENST00000251303	0	548593	SLX1A	SLX1 homolog A, structure-specific endonuclease subunit
12	56103927	56105087	1161	*	.	1000	17.7639	7956.5	7950.5	527	Promoter (<=1kb)	457	56104537	56113907	9371	1	ENSG00000170515	ENST00000552766	0	5036	PA2G4	proliferation-associated 2G4
17	47649177	47650974	1798	*	.	1000	12.3115	7927.43	7921.45	444	Promoter (<=1kb)	462	47649476	47682633	33158	1	ENSG00000108424	ENST00000535458	0	3837	KPNB1	karyopherin subunit beta 1
2	3557800	3559252	1453	*	.	1000	19.3408	7888.16	7882.19	739	Promoter (<=1kb)	447	3541430	3558333	16904	2	ENSG00000171865	ENST00000315212	0	246243	RNASEH1	ribonuclease H1
19	47047815	47049221	1407	*	.	1000	19.9871	7859.49	7853.54	895	Promoter (<=1kb)	464	47045909	47048624	2716	2	ENSG00000130748	ENST00000253047	0	54958	TMEM160	transmembrane protein 160
11	14890972	14892623	1652	*	.	1000	19.1376	7851.53	7845.58	1306	Promoter (<=1kb)	456	14877440	14892231	14792	2	ENSG00000186104	ENST00000334636	0	120227	CYP2R1	cytochrome P450 family 2 subfamily R member 1
5	108747686	108749745	2060	*	.	1000	15.4733	7849.28	7843.33	1198	Promoter (<=1kb)	450	108747841	108832924	85084	1	ENSG00000151422	ENST00000509035	0	2241	FER	FER tyrosine kinase
17	46192570	46194393	1824	*	.	1000	15.8539	7836.46	7830.52	1508	Promoter (<=1kb)	462	46029916	46193429	163514	2	ENSG00000120071	ENST00000432791	0	284058	KANSL1	KAT8 regulatory NSL complex subunit 1
19	36013919	36014892	974	*	.	1000	16.659	7796.07	7790.15	430	Promoter (<=1kb)	464	36009120	36014213	5094	2	ENSG00000239382	ENST00000378875	0	84964	ALKBH6	alkB homolog 6
19	35643243	35645323	2081	*	.	1000	10.1739	7780.01	7774.09	1276	Promoter (<=1kb)	464	35643666	35644682	1017	1	ENSG00000105672	ENST00000591135	0	2116	ETV2	ETS variant transcription factor 2
2	73232983	73234907	1925	*	.	1000	13.2359	7773.67	7767.76	407	Promoter (<=1kb)	447	73228010	73233239	5230	2	ENSG00000135617	ENST00000258083	0	84279	PRADC1	protease associated domain containing 1
15	100601859	100603354	1496	*	.	1000	19.2329	7740.01	7734.11	658	Promoter (<=1kb)	460	100566924	100602184	35261	2	ENSG00000140471	ENST00000314742	0	55180	LINS1	lines homolog 1
17	48047553	48049292	1740	*	.	1000	13.737	7726.16	7720.27	635	Promoter (<=1kb)	462	48048329	48051146	2818	1	ENSG00000082641	ENST00000579889	0	4779	NFE2L1	nuclear factor, erythroid 2 like 1
2	69914111	69915573	1463	*	.	1000	13.422	7681.79	7675.91	553	Promoter (<=1kb)	447	69915041	69942938	27898	1	ENSG00000059728	ENST00000540449	0	4084	MXD1	MAX dimerization protein 1
2	46698309	46699664	1356	*	.	1000	18.1453	7592.83	7586.99	733	Promoter (<=1kb)	447	46698952	46763129	64178	1	ENSG00000171150	ENST00000306503	0	9655	SOCS5	suppressor of cytokine signaling 5
15	84715401	84717221	1821	*	.	1000	17.3206	7583.84	7578.01	1087	Promoter (<=1kb)	460	84669538	84716460	46923	2	ENSG00000140612	ENST00000559729	0	23478	SEC11A	SEC11 homolog A, signal peptidase complex subunit
2	24083768	24085357	1590	*	.	1000	12.1537	7541.12	7535.3	666	Promoter (<=1kb)	447	24077433	24084834	7402	2	ENSG00000115129	ENST00000238721	0	9540	TP53I3	tumor protein p53 inducible protein 3
19	39390568	39391853	1286	*	.	1000	15.1759	7529.1	7523.29	619	Promoter (<=1kb)	464	39385629	39391106	5478	2	ENSG00000006712	ENST00000221265	0	54623	PAF1	PAF1 homolog, Paf1/RNA polymerase II complex component
19	41883772	41884844	1073	*	.	1000	15.8281	7509.7	7503.9	501	Promoter (<=1kb)	464	41884370	41907454	23085	1	ENSG00000076928	ENST00000378152	0	9138	ARHGEF1	Rho guanine nucleotide exchange factor 1
15	81323732	81324978	1247	*	.	1000	23.1183	7494.25	7488.45	591	Promoter (<=1kb)	460	81309053	81324141	15089	2	ENSG00000172345	ENST00000302824	0	80765	STARD5	StAR related lipid transfer domain containing 5
19	38930064	38931745	1682	*	.	1000	16.4676	7480.74	7474.95	806	Promoter (<=1kb)	464	38915266	38930763	15498	2	ENSG00000104835	ENST00000221431	0	54938	SARS2	seryl-tRNA synthetase 2, mitochondrial
17	13017298	13018618	1321	*	.	1000	20.3055	7475.27	7469.47	779	Promoter (<=1kb)	462	12991612	13018027	26416	2	ENSG00000006744	ENST00000338034	0	60528	ELAC2	elaC ribonuclease Z 2
15	58770568	58772253	1686	*	.	1000	16.47	7419.82	7414.05	632	Promoter (<=1kb)	460	58771192	58857552	86361	1	ENSG00000128923	ENST00000316848	0	54629	MINDY2	MINDY lysine 48 deubiquitinase 2
14	77616207	77617198	992	*	.	1000	18.7634	7353.96	7348.22	699	Promoter (<=1kb)	459	77505997	77616637	110641	2	ENSG00000100596	ENST00000216484	0	9517	SPTLC2	serine palmitoyltransferase long chain base subunit 2
1	248837771	248839318	1548	*	.	1000	13.2782	7324.23	7318.5	525	Promoter (<=1kb)	446	248838210	248847208	8999	1	ENSG00000171161	ENST00000510904	0	79894	ZNF672	zinc finger protein 672
15	89087682	89089294	1613	*	.	1000	16.0748	7313.76	7308.04	571	Promoter (<=1kb)	460	89088422	89113816	25395	1	ENSG00000140526	ENST00000564876	0	11057	ABHD2	abhydrolase domain containing 2, acylglycerol lipase
11	78187977	78189342	1366	*	.	1000	16.3438	7306.43	7300.72	738	Promoter (<=1kb)	456	78188812	78214026	25215	1	ENSG00000118369	ENST00000530267	0	57558	USP35	ubiquitin specific peptidase 35
20	3888357	3889996	1640	*	.	1000	15.7497	7302.4	7296.68	875	Promoter (<=1kb)	465	3888839	3926958	38120	1	ENSG00000125779	ENST00000497424	0	80025	PANK2	pantothenate kinase 2
19	48468580	48470041	1462	*	.	1000	13.3289	7300.02	7294.31	643	Promoter (<=1kb)	464	48469208	48482313	13106	1	ENSG00000105443	ENST00000427476	0	9266	CYTH2	cytohesin 2
19	42325041	42326439	1399	*	.	1000	15.1095	7289.76	7284.04	467	Promoter (<=1kb)	464	42325609	42378769	53161	1	ENSG00000105429	ENST00000334370	0	1954	MEGF8	multiple EGF like domains 8
19	38335515	38337320	1806	*	.	1000	11.5728	7261.01	7255.31	909	Promoter (<=1kb)	464	38335775	38370943	35169	1	ENSG00000099338	ENST00000410018	0	57828	CATSPERG	cation channel sperm associated auxiliary subunit gamma
1	171780836	171782149	1314	*	.	1000	20.2924	7254.8	7249.1	575	Promoter (<=1kb)	446	171781660	171797716	16057	1	ENSG00000010165	ENST00000361735	0	51603	EEF1AKNMT	eEF1A lysine and N-terminal methyltransferase
19	38899321	38900514	1194	*	.	1000	15.4591	7247.31	7241.62	524	Promoter (<=1kb)	464	38878555	38899862	21308	2	ENSG00000068903	ENST00000358931	0	22933	SIRT2	sirtuin 2
3	36992599	36993901	1303	*	.	1000	16.1143	7246.93	7241.24	576	Promoter (<=1kb)	448	36993350	37050842	57493	1	ENSG00000076242	ENST00000536378	0	4292	MLH1	mutL homolog 1
12	82685735	82687919	2185	*	.	1000	14.8228	7216.58	7210.9	1086	Promoter (<=1kb)	457	82686880	82986573	299694	1	ENSG00000179104	ENST00000551915	0	160335	TMTC2	transmembrane O-mannosyltransferase targeting cadherins 2
12	95473470	95474851	1382	*	.	1000	21.1613	7198.58	7192.91	586	Promoter (<=1kb)	457	95473520	95514342	40823	1	ENSG00000111142	ENST00000535095	0	10988	METAP2	methionyl aminopeptidase 2
12	6851236	6852919	1684	*	.	1000	11.001	7187.41	7181.74	1237	Promoter (<=1kb)	457	6844793	6851269	6477	2	ENSG00000111665	ENST00000422785	0	83461	CDCA3	cell division cycle associated 3
2	74529037	74530782	1746	*	.	1000	15.0469	7185.12	7179.46	878	Promoter (<=1kb)	447	74526645	74529760	3116	2	ENSG00000115307	ENST00000425118	0	550	AUP1	AUP1 lipid droplet regulating VLDL assembly factor
19	32971159	32972729	1571	*	.	1000	16.1542	7175.96	7170.3	1003	Promoter (<=1kb)	464	32875925	32971958	96034	2	ENSG00000121289	ENST00000305768	0	84902	CEP89	centrosomal protein 89
9	100098194	100100014	1821	*	.	1000	16.7016	7158.55	7152.9	942	Promoter (<=1kb)	454	99979185	100099000	119816	2	ENSG00000023318	ENST00000262455	0	23071	ERP44	endoplasmic reticulum protein 44
19	38849233	38851022	1790	*	.	1000	9.79736	7139.97	7134.32	1260	Promoter (<=1kb)	464	38836370	38849986	13617	2	ENSG00000104824	ENST00000221419	0	3191	HNRNPL	heterogeneous nuclear ribonucleoprotein L
8	66666245	66667895	1651	*	.	1000	18.3504	7127.45	7121.81	1102	Promoter (<=1kb)	453	66628487	66667231	38745	2	ENSG00000175073	ENST00000310421	0	80124	VCPIP1	valosin containing protein interacting protein 1
17	75288741	75290325	1585	*	.	1000	17.731	7103.62	7097.99	758	Promoter (<=1kb)	462	75272981	75289449	16469	2	ENSG00000125454	ENST00000375261	0	60386	SLC25A19	solute carrier family 25 member 19
19	55339080	55340395	1316	*	.	1000	11.2373	7068.54	7062.92	384	Promoter (<=1kb)	464	55339853	55343818	3966	1	ENSG00000133247	ENST00000589338	0	84787	KMT5C	lysine methyltransferase 5C
8	25458154	25459530	1377	*	.	1000	14.7475	7063.46	7057.84	436	Promoter (<=1kb)	453	25427847	25458433	30587	2	ENSG00000104756	ENST00000221200	0	54793	KCTD9	potassium channel tetramerization domain containing 9
19	41439437	41440329	893	*	.	1000	18.7221	7061.15	7055.54	174	Promoter (<=1kb)	464	41431318	41439910	8593	2	ENSG00000105341	ENST00000438807	0	55101	DMAC2	distal membrane arm assembly component 2
2	88627118	88628362	1245	*	.	1000	14.3956	7050	7044.39	672	Promoter (<=1kb)	447	88556741	88627464	70724	2	ENSG00000172071	ENST00000303236	0	9451	EIF2AK3	eukaryotic translation initiation factor 2 alpha kinase 3
12	49321966	49323727	1762	*	.	1000	20.6465	7018.9	7013.31	1046	Promoter (<=1kb)	457	49323236	49324296	1061	1	ENSG00000135451	ENST00000549275	0	10024	TROAP	trophinin associated protein
2	196639209	196640221	1013	*	.	1000	23.8034	7017.81	7012.21	383	Promoter (<=1kb)	447	196639554	196732800	93247	1	ENSG00000144395	ENST00000431807	0	284992	CCDC150	coiled-coil domain containing 150
14	66507385	66509342	1958	*	.	1000	17.2373	7009.77	7004.17	641	Promoter (<=1kb)	459	66507407	67181798	674392	1	ENSG00000171723	ENST00000315266	0	10243	GPHN	gephyrin
19	37317160	37318240	1081	*	.	1000	21.2187	7002.95	6997.36	613	Promoter (<=1kb)	464	37317887	37364407	46521	1	ENSG00000181666	ENST00000652615	0	284459	ZNF875	zinc finger protein 875
10	99620337	99621745	1409	*	.	1000	14.6106	7001.17	6995.58	447	Promoter (<=1kb)	455	99610522	99620439	9918	2	ENSG00000155287	ENST00000370495	0	81894	SLC25A28	solute carrier family 25 member 28
8	92964862	92966489	1628	*	.	1000	19.6406	6995.66	6990.07	1291	Promoter (<=1kb)	453	92883532	92966144	82613	2	ENSG00000205133	ENST00000537541	0	286144	TRIQK	triple QxxK/R motif containing
12	56645680	56646549	870	*	.	1000	20.6925	6992.68	6987.09	382	Promoter (<=1kb)	457	56638175	56645984	7810	2	ENSG00000110955	ENST00000262030	0	506	ATP5F1B	ATP synthase F1 subunit beta
2	239400904	239402210	1307	*	.	1000	18.9504	6941.8	6936.24	392	Promoter (<=1kb)	447	239048168	239400949	352782	2	ENSG00000068024	ENST00000345617	0	9759	HDAC4	histone deacetylase 4
2	74653503	74654901	1399	*	.	1000	21.1543	6937.68	6932.12	700	Promoter (<=1kb)	447	74654228	74683853	29626	1	ENSG00000135622	ENST00000611975	0	10505	SEMA4F	ssemaphorin 4F
19	36214136	36215539	1404	*	.	1000	14.6169	6935.11	6929.55	519	Promoter (<=1kb)	464	36214602	36238771	24170	1	ENSG00000167635	ENST00000456324	0	7705	ZNF146	zinc finger protein 146
8	144103482	144105076	1595	*	.	1000	11.7498	6933.81	6928.25	902	Promoter (<=1kb)	453	144098637	144103773	5137	2	ENSG00000179526	ENST00000398712	0	81858	SHARPIN	SHANK associated RH domain interactor
2	86719192	86720872	1681	*	.	1000	17.9395	6931.61	6926.06	779	Promoter (<=1kb)	447	86720291	86778041	57751	1	ENSG00000153561	ENST00000283632	0	64795	RMND5A	required for meiotic nuclear division 5 homolog A
2	74457334	74458709	1376	*	.	1000	11.5666	6921.46	6915.91	970	Promoter (<=1kb)	447	74458400	74460891	2492	1	ENSG00000239779	ENST00000393972	0	23559	WBP1	WW domain binding protein 1
7	143835838	143837564	1727	*	.	1000	13.7566	6920.61	6915.06	962	Promoter (<=1kb)	452	143761790	143836705	74916	2	ENSG00000253882	ENST00000491047	0	154761	LOC154761	family with sequence similarity 115, member C pseudogene
2	20051330	20052288	959	*	.	1000	15.2653	6919.83	6914.28	431	Promoter (<=1kb)	447	20032650	20051628	18979	2	ENSG00000068697	ENST00000175091	0	9741	LAPTM4A	lysosomal protein transmembrane 4 alpha
17	28811635	28813004	1370	*	.	1000	17.5866	6911.46	6905.91	916	Promoter (<=1kb)	462	28755980	28812224	56245	2	ENSG00000173065	ENST00000582059	0	55731	FAM222B	family with sequence similarity 222 member B
15	76931262	76932390	1129	*	.	1000	24.1578	6907.18	6901.64	359	Promoter (<=1kb)	460	76931738	76949860	18123	1	ENSG00000117906	ENST00000320963	0	5955	RCN2	reticulocalbin 2
17	60677062	60678365	1304	*	.	1000	17.8141	6900.39	6894.85	735	Promoter (<=1kb)	462	60677453	60747282	69830	1	ENSG00000141376	ENST00000588168	0	54828	BCAS3	BCAS3 microtubule associated cell migration factor
10	110918446	110919889	1444	*	.	1000	14.095	6899.46	6893.92	881	Promoter (<=1kb)	455	110919367	111015491	96125	1	ENSG00000108061	ENST00000688928	0	8036	SHOC2	SHOC2 leucine rich repeat scaffold protein
19	45691644	45693098	1455	*	.	1000	13.9337	6891.3	6885.77	907	Promoter (<=1kb)	464	45692403	45701914	9512	1	ENSG00000011478	ENST00000677024	0	54814	QPCTL	glutaminyl-peptide cyclotransferase like
2	58046290	58047539	1250	*	.	1000	16.1474	6885.37	6879.84	399	Promoter (<=1kb)	447	58046642	58159920	113279	1	ENSG00000028116	ENST00000412104	0	7444	VRK2	VRK serine/threonine kinase 2
10	123153949	123155266	1318	*	.	1000	19.3247	6845.5	6839.99	375	Promoter (<=1kb)	455	123154402	123165212	10811	1	ENSG00000154473	ENST00000368859	0	9184	BUB3	BUB3 mitotic checkpoint protein
8	109333421	109334797	1377	*	.	1000	16.9595	6821.31	6815.81	834	Promoter (<=1kb)	453	109240919	109334087	93169	2	ENSG00000120526	ENST00000239690	0	84955	NUDCD1	NudC domain containing 1
10	74825402	74827325	1924	*	.	1000	13.3317	6819.96	6814.46	1079	Promoter (<=1kb)	455	74825484	75032237	206754	1	ENSG00000156650	ENST00000649006	0	23522	KAT6B	lysine acetyltransferase 6B
2	26785392	26787058	1667	*	.	1000	18.3975	6816.84	6811.34	501	Promoter (<=1kb)	447	26786027	26794076	8050	1	ENSG00000115163	ENST00000472719	0	1058	CENPA	centromere protein A
1	185156240	185157728	1489	*	.	1000	15.5389	6816.82	6811.32	880	Promoter (<=1kb)	446	185157080	185291007	133928	1	ENSG00000116668	ENST00000367501	0	54823	SWT1	SWT1 RNA endoribonuclease homolog
2	41840522	41841690	1169	*	.	1000	21.9846	6810.59	6805.1	437	Distal Intergenic	447	41850203	41850601	399	2	ENSG00000236533	ENST00000414823	8911	NA	NA	NA
17	63621520	63622642	1123	*	.	1000	14.6948	6797.69	6792.2	576	Promoter (<=1kb)	462	63622415	63695089	72675	1	ENSG00000198909	ENST00000579585	0	4215	MAP3K3	mitogen-activated protein kinase kinase kinase 3
2	44167747	44169781	2035	*	.	1000	11.8191	6795.22	6789.73	334	Promoter (<=1kb)	447	44167969	44218537	50569	1	ENSG00000138032	ENST00000419807	0	5495	PPM1B	protein phosphatase, Mg2+/Mn2+ dependent 1B
12	55973390	55974564	1175	*	.	1000	14.3912	6790.97	6785.48	537	Promoter (<=1kb)	457	55973913	55994706	20794	1	ENSG00000111540	ENST00000553116	0	5869	RAB5B	RAB5B, member RAS oncogene family
16	72093272	72094388	1117	*	.	1000	19.9934	6767.1	6761.62	516	Promoter (<=1kb)	461	72093613	72096912	3300	1	ENSG00000140829	ENST00000566794	0	9785	DHX38	DEAH-box helicase 38
15	79922750	79924306	1557	*	.	1000	15.8282	6766.27	6760.79	1023	Promoter (<=1kb)	460	79898904	79923702	24799	2	ENSG00000180953	ENST00000485386	0	400410	ST20	suppressor of tumorigenicity 20
17	8295045	8296075	1031	*	.	1000	20.3212	6732.36	6726.9	381	Promoter (<=1kb)	462	8287763	8295343	7581	2	ENSG00000125434	ENST00000579192	0	399512	SLC25A35	solute carrier family 25 member 35
5	151770622	151772302	1681	*	.	1000	12.9239	6727.96	6722.5	850	Promoter (<=1kb)	450	151771045	151791029	19985	1	ENSG00000145907	ENST00000523519	0	10146	G3BP1	G3BP stress granule assembly factor 1
2	30146261	30147374	1114	*	.	1000	17.9843	6709.41	6703.96	395	Promoter (<=1kb)	447	30146941	30160533	13593	1	ENSG00000119801	ENST00000379519	0	51646	YPEL5	yippee like 5
3	9749226	9750549	1324	*	.	1000	17.2574	6704.19	6698.75	728	Promoter (<=1kb)	448	9749944	9757407	7464	1	ENSG00000114026	ENST00000302003	0	4968	OGG1	8-oxoguanine DNA glycosylase
17	28318416	28319722	1307	*	.	1000	20.4223	6686.8	6681.36	647	Promoter (<=1kb)	462	28319200	28328685	9486	1	ENSG00000109084	ENST00000226230	0	27346	TMEM97	transmembrane protein 97
5	127029546	127031366	1821	*	.	1000	17.1155	6668.58	6663.15	1091	Promoter (<=1kb)	450	126867714	127030558	162845	2	ENSG00000173926	ENST00000308660	0	115123	MARCHF3	membrane associated ring-CH-type finger 3
1	169485196	169486641	1446	*	.	1000	20.9488	6663.67	6658.24	802	Promoter (<=1kb)	446	169463909	169485944	22036	2	ENSG00000117479	ENST00000236137	0	10560	SLC19A2	solute carrier family 19 member 2
1	159780512	159781647	1136	*	.	1000	19.1747	6650.49	6645.07	380	Promoter (<=1kb)	446	159780932	159782543	1612	1	ENSG00000158716	ENST00000368109	0	54935	DUSP23	dual specificity phosphatase 23
1	244652591	244653852	1262	*	.	1000	17.3425	6644.98	6639.56	246	Promoter (<=1kb)	446	244653103	244705951	52849	1	ENSG00000121644	ENST00000263831	0	51029	DESI2	desumoylating isopeptidase 2
5	138331205	138332379	1175	*	.	1000	21.2462	6643.52	6638.1	739	Promoter (<=1kb)	450	138331935	138345058	13124	1	ENSG00000120709	ENST00000512180	0	51307	FAM53C	family with sequence similarity 53 member C
17	7403265	7405204	1940	*	.	1000	15.1255	6627.27	6621.86	892	Promoter (<=1kb)	462	7404874	7418684	13811	1	ENSG00000169992	ENST00000575301	0	57555	NLGN2	neuroligin 2
1	225777151	225778446	1296	*	.	1000	20.6997	6611.96	6606.56	612	Promoter (<=1kb)	446	225777813	225786969	9157	1	ENSG00000143742	ENST00000619790	0	6726	SRP9	signal recognition particle 9
2	171433663	171434903	1241	*	.	1000	15.5489	6611.77	6606.36	427	Promoter (<=1kb)	447	171434217	171482158	47942	1	ENSG00000115827	ENST00000468592	0	80067	DCAF17	DDB1 and CUL4 associated factor 17
17	81222689	81223714	1026	*	.	1000	20.2599	6607.68	6602.27	385	Promoter (<=1kb)	462	81189593	81222945	33353	2	ENSG00000141577	ENST00000374782	0	22994	CEP131	centrosomal protein 131
2	24046898	24048065	1168	*	.	1000	16.0826	6596.38	6590.98	595	Promoter (<=1kb)	447	24029347	24047361	18015	2	ENSG00000163026	ENST00000406895	0	80304	WDCP	WD repeat and coiled coil containing
5	108727332	108728782	1451	*	.	1000	26.1434	6579.13	6573.74	1027	Promoter (<=1kb)	450	108727825	108728260	436	2	ENSG00000272523	ENST00000606054	0	100652853	LINC01023	long intergenic non-protein coding RNA 1023
1	236794866	236796185	1320	*	.	1000	20.0675	6570.51	6565.12	358	Promoter (<=1kb)	446	236795260	236900656	105397	1	ENSG00000116984	ENST00000680454	0	4548	MTR	5-methyltetrahydrofolate-homocysteine methyltransferase
20	18507220	18508375	1156	*	.	1000	19.8565	6555.1	6549.72	627	Promoter (<=1kb)	465	18507520	18561415	53896	1	ENSG00000101310	ENST00000336714	0	10483	SEC23B	SEC23 homolog B, COPII coat complex component
2	175167295	175168849	1555	*	.	1000	15.2265	6535.43	6530.06	1160	Promoter (<=1kb)	447	175072250	175168206	95957	2	ENSG00000115966	ENST00000345739	0	1386	ATF2	activating transcription factor 2
19	55461519	55462237	719	*	.	1000	16.3679	6532.24	6526.87	201	Promoter (<=1kb)	464	55452985	55461642	8658	2	ENSG00000063241	ENST00000425675	0	79763	ISOC2	isochorismatase domain containing 2
17	4730685	4732136	1452	*	.	1000	17.5673	6526.89	6521.53	1035	Promoter (<=1kb)	462	4731428	4733312	1885	1	ENSG00000161920	ENST00000575284	0	400569	MED11	mediator complex subunit 11
17	81238592	81239672	1081	*	.	1000	14.9338	6525.3	6519.94	541	Promoter (<=1kb)	462	81228277	81239041	10765	2	ENSG00000167302	ENST00000573295	0	146705	TEPSIN	TEPSIN adaptor related protein complex 4 accessory protein
9	72304927	72305724	798	*	.	1000	27.2173	6522.39	6517.03	367	Promoter (<=1kb)	454	72305367	72316942	11576	1	ENSG00000225434	ENST00000659727	0	100507540	LINC01504	long intergenic non-protein coding RNA 1504
19	37906271	37907647	1377	*	.	1000	15.3665	6520.64	6515.28	833	Promoter (<=1kb)	464	37907208	38208369	301162	1	ENSG00000105738	ENST00000222345	0	23094	SIPA1L3	signal induced proliferation associated 1 like 3
2	162343778	162344878	1101	*	.	1000	21.8105	6518.31	6512.96	238	Promoter (<=1kb)	447	162344132	162363123	18992	1	ENSG00000115271	ENST00000437150	0	25801	GCA	grancalcin
3	93979802	93980707	906	*	.	1000	20.7296	6511.55	6506.2	254	Promoter (<=1kb)	448	93980139	94055668	75530	1	ENSG00000169379	ENST00000535334	0	200894	ARL13B	ADP ribosylation factor like GTPase 13B
12	57077994	57079246	1253	*	.	1000	19.9203	6507.26	6501.91	862	Promoter (<=1kb)	457	57055643	57078763	23121	2	ENSG00000166881	ENST00000379391	0	23306	NEMP1	nuclear envelope integral membrane protein 1
4	165327125	165328199	1075	*	.	1000	20.7314	6491.04	6485.7	402	Promoter (<=1kb)	449	165327667	165340351	12685	1	ENSG00000052802	ENST00000507013	0	6307	MSMO1	methylsterol monooxygenase 1
17	19377535	19378961	1427	*	.	1000	13.1284	6480.67	6475.33	859	Promoter (<=1kb)	462	19336552	19377907	41356	2	ENSG00000108641	ENST00000674596	0	27077	B9D1	B9 domain containing 1
12	55996789	55997919	1131	*	.	1000	22.6497	6474.76	6469.43	398	Promoter (<=1kb)	457	55997180	56005525	8346	1	ENSG00000139531	ENST00000356124	0	6821	SUOX	sulfite oxidase
1	153727464	153729011	1548	*	.	1000	22.7237	6470.93	6465.6	426	Promoter (<=1kb)	446	153728050	153774808	46759	1	ENSG00000143624	ENST00000318967	0	65123	INTS3	integrator complex subunit 3
9	78296203	78298215	2013	*	.	1000	17.7173	6459.38	6454.05	854	Promoter (<=1kb)	454	78297125	78330093	32969	1	ENSG00000135069	ENST00000376588	0	29968	PSAT1	phosphoserine aminotransferase 1
19	35931196	35932133	938	*	.	1000	17.5364	6446.16	6440.84	498	Distal Intergenic	464	35935358	35936792	1435	1	ENSG00000126243	ENST00000585876	-3225	79414	LRFN3	leucine rich repeat and fibronectin type III domain containing 3
17	59106030	59107513	1484	*	.	1000	15.6766	6444.97	6439.65	983	Promoter (<=1kb)	462	58982651	59106921	124271	2	ENSG00000108395	ENST00000393066	0	4591	TRIM37	tripartite motif containing 37
12	14802949	14804044	1096	*	.	1000	21.6967	6441.22	6435.9	657	Promoter (<=1kb)	457	14784582	14803478	18897	2	ENSG00000084463	ENST00000261167	0	51729	WBP11	WW domain binding protein 11
14	75660597	75661770	1174	*	.	1000	19.9518	6441.05	6435.73	390	Promoter (<=1kb)	459	75660992	75690282	29291	1	ENSG00000119685	ENST00000555290	0	23093	TTLL5	tubulin tyrosine ligase like 5
17	46224815	46226044	1230	*	.	1000	22.2452	6431.56	6426.25	616	Promoter (<=1kb)	462	46029916	46225389	195474	2	ENSG00000120071	ENST00000574590	0	284058	KANSL1	KAT8 regulatory NSL complex subunit 1
10	92290206	92291894	1689	*	.	1000	19.9804	6428.46	6423.15	899	Promoter (<=1kb)	455	92046692	92291078	244387	2	ENSG00000107864	ENST00000265997	0	22849	CPEB3	cytoplasmic polyadenylation element binding protein 3
8	124997587	124999214	1628	*	.	1000	15.5004	6413.66	6408.36	835	Promoter (<=1kb)	453	124998497	125022281	23785	1	ENSG00000104549	ENST00000523430	0	6713	SQLE	squalene epoxidase
2	32063030	32064263	1234	*	.	1000	16.2711	6403.29	6397.99	608	Promoter (<=1kb)	447	32063556	32157637	94082	1	ENSG00000021574	ENST00000315285	0	6683	SPAST	spastin
15	90716713	90718022	1310	*	.	1000	20.984	6397.18	6391.89	541	Promoter (<=1kb)	460	90717346	90816166	98821	1	ENSG00000197299	ENST00000355112	0	641	BLM	BLM RecQ like helicase
10	28302442	28303524	1083	*	.	1000	24.1355	6393.21	6387.92	759	Promoter (<=1kb)	455	28050993	28303064	252072	2	ENSG00000150054	ENST00000683449	0	143098	MPP7	membrane palmitoylated protein 7
19	36127531	36128742	1212	*	.	1000	16.47	6385.36	6380.08	544	Distal Intergenic	464	36121895	36125945	4051	1	ENSG00000105254	ENST00000468156	5636	1155	TBCB	tubulin folding cofactor B
5	83076910	83078100	1191	*	.	1000	25.5868	6385.13	6379.84	533	Promoter (<=1kb)	450	83077498	83353758	276261	1	ENSG00000152422	ENST00000282268	0	7518	XRCC4	X-ray repair cross complementing 4
12	49741110	49742510	1401	*	.	1000	17.5371	6382.86	6377.57	321	Promoter (<=1kb)	457	49741544	49758265	16722	1	ENSG00000139644	ENST00000549966	0	7009	TMBIM6	transmembrane BAX inhibitor motif containing 6
1	226939348	226940760	1413	*	.	1000	17.4012	6381.75	6376.46	774	Promoter (<=1kb)	446	226940286	226987544	47259	1	ENSG00000163050	ENST00000366778	0	56997	COQ8A	coenzyme Q8A
17	49788354	49789457	1104	*	.	1000	16.3924	6370.96	6365.68	862	Promoter (<=1kb)	462	49710995	49788592	77598	2	ENSG00000121104	ENST00000513602	0	81558	FAM117A	family with sequence similarity 117 member A
17	47895197	47896845	1649	*	.	1000	13.9071	6370.46	6365.18	943	Promoter (<=1kb)	462	47896150	47915388	19239	1	ENSG00000167182	ENST00000642065	0	6668	SP2	Sp2 transcription factor
1	201954894	201955997	1104	*	.	1000	22.1501	6367.17	6361.89	509	Promoter (<=1kb)	446	201955503	201970664	15162	1	ENSG00000134375	ENST00000367287	0	10440	TIMM17A	translocase of inner mitochondrial membrane 17A
1	244451034	244452407	1374	*	.	1000	17.384	6363.68	6358.41	975	Promoter (<=1kb)	446	244408494	244451909	43416	2	ENSG00000035687	ENST00000366535	0	159	ADSS2	adenylosuccinate synthase 2
2	87075813	87077533	1721	*	.	1000	17.9105	6353.7	6348.43	950	Promoter (<=1kb)	447	87055658	87076060	20403	2	ENSG00000266931	ENST00000592457	0	NA	NA	NA
8	28889835	28890705	871	*	.	1000	16.5426	6351.74	6346.47	372	Promoter (<=1kb)	453	28767661	28889913	122253	2	ENSG00000104299	ENST00000523303	0	55756	INTS9	integrator complex subunit 9
12	68331879	68332783	905	*	.	1000	20.4293	6351.39	6346.12	585	Promoter (<=1kb)	457	68294566	68332362	37797	2	ENSG00000111554	ENST00000682720	0	56890	MDM1	Mdm1 nuclear protein
7	23013227	23014484	1258	*	.	1000	22.9307	6346.59	6341.33	935	Promoter (<=1kb)	452	22920232	23014087	93856	2	ENSG00000122591	ENST00000465661	0	84668	FAM126A	family with sequence similarity 126 member A
9	4792121	4793527	1407	*	.	1000	17.7348	6345.87	6340.6	637	Promoter (<=1kb)	454	4792944	4861066	68123	1	ENSG00000120158	ENST00000381750	0	10171	RCL1	RNA terminal phosphate cyclase like 1
12	112125078	112126145	1068	*	.	1000	20.7256	6333.95	6328.69	403	Promoter (<=1kb)	457	112125538	112141491	15954	1	ENSG00000135148	ENST00000550051	0	10906	TRAFD1	TRAF-type zinc finger domain containing 1
17	30599792	30601600	1809	*	.	1000	16.9365	6331.95	6326.7	596	Promoter (<=1kb)	462	30600892	30634326	33435	1	ENSG00000214719	ENST00000651170	0	NA	NA	NA
3	120093882	120096007	2126	*	.	1000	9.99408	6329.12	6323.87	1169	Promoter (<=1kb)	448	119821321	120094447	273127	2	ENSG00000082701	ENST00000264235	0	2932	GSK3B	glycogen synthase kinase 3 beta
12	51047599	51048949	1351	*	.	1000	22.9339	6319.57	6314.32	594	Promoter (<=1kb)	457	51047962	51058087	10126	1	ENSG00000050426	ENST00000551477	0	25875	LETMD1	LETM1 domain containing 1
12	55817251	55818552	1302	*	.	1000	15.6957	6306.17	6300.93	698	Promoter (<=1kb)	457	55818041	55820712	2672	1	ENSG00000123353	ENST00000552672	0	29095	ORMDL2	ORMDL sphingolipid biosynthesis regulator 2
12	88141539	88143024	1486	*	.	1000	18.7636	6294.37	6289.13	702	Promoter (<=1kb)	457	88142296	88154324	12029	1	ENSG00000139324	ENST00000549011	0	160418	TMTC3	transmembrane O-mannosyltransferase targeting cadherins 3
7	100585713	100586813	1101	*	.	1000	13.7997	6290.48	6285.24	828	Promoter (<=1kb)	452	100574011	100586129	12119	2	ENSG00000077454	ENST00000310300	0	4034	LRCH4	leucine rich repeats and calponin homology domain containing 4
17	8629902	8631845	1944	*	.	1000	16.0632	6288.86	6283.63	1062	Promoter (<=1kb)	462	8474207	8630761	156555	2	ENSG00000133026	ENST00000379980	0	4628	MYH10	myosin heavy chain 10
8	73971703	73972995	1293	*	.	1000	13.9678	6284.66	6279.42	614	Promoter (<=1kb)	453	73939169	73972186	33018	2	ENSG00000154582	ENST00000602840	0	6921	ELOC	elongin C
10	25015843	25017502	1660	*	.	1000	18.3366	6281.52	6276.29	734	Promoter (<=1kb)	455	24981979	25016160	34182	2	ENSG00000151023	ENST00000496261	0	219670	ENKUR	enkurin, TRPC channel interacting protein
9	41272908	41274391	1484	*	.	1000	30.7017	6280.7	6275.47	1165	Promoter (<=1kb)	454	41269916	41273997	4082	2	ENSG00000279561	ENST00000633881	0	100132249	LOC100132249	uncharacterized LOC100132249
15	78506965	78508092	1128	*	.	1000	16.0439	6273.03	6267.8	558	Promoter (<=1kb)	460	78507564	78537372	29809	1	ENSG00000188266	ENST00000408962	0	123688	HYKK	hydroxylysine kinase
1	151790021	151791609	1589	*	.	1000	19.4243	6270.51	6265.28	593	Promoter (<=1kb)	446	151770107	151790488	20382	2	ENSG00000182134	ENST00000525790	0	11022	TDRKH	tudor and KH domain containing
5	123422450	123424162	1713	*	.	1000	21.9185	6265.98	6260.76	987	Promoter (<=1kb)	450	123344892	123423403	78512	2	ENSG00000168944	ENST00000306467	0	153241	CEP120	centrosomal protein 120
7	100538462	100539861	1400	*	.	1000	18.402	6264.98	6259.75	645	Promoter (<=1kb)	452	100539203	100568220	29018	1	ENSG00000106351	ENST00000300176	0	3268	AGFG2	ArfGAP with FG repeats 2
1	212284634	212286651	2018	*	.	1000	13.9508	6257.51	6252.29	546	Promoter (<=1kb)	446	212285410	212361853	76444	1	ENSG00000066027	ENST00000261461	0	5525	PPP2R5A	protein phosphatase 2 regulatory subunit B'alpha
19	40576289	40577695	1407	*	.	1000	18.8317	6255.17	6249.95	519	Promoter (<=1kb)	464	40576853	40580650	3798	1	ENSG00000160410	ENST00000595803	0	92799	SHKBP1	SH3KBP1 binding protein 1
2	63840356	63842181	1826	*	.	1000	13.482	6254.1	6248.89	545	Promoter (<=1kb)	447	63840952	63884110	43159	1	ENSG00000169764	ENST00000466642	0	7360	UGP2	UDP-glucose pyrophosphorylase 2
14	35825934	35827160	1227	*	.	1000	15.1578	6251.83	6246.61	370	Promoter (<=1kb)	459	35826338	35871963	45626	1	ENSG00000100916	ENST00000216807	0	84312	BRMS1L	BRMS1 like transcriptional repressor
2	178450477	178452049	1573	*	.	1000	15.95	6249.45	6244.23	849	Promoter (<=1kb)	447	178431414	178451175	19762	2	ENSG00000180228	ENST00000325748	0	8575	PRKRA	protein activator of interferon induced protein kinase EIF2AK2
9	129080659	129081670	1012	*	.	1000	17.0728	6242.81	6237.59	352	Promoter (<=1kb)	454	129081111	129090435	9325	1	ENSG00000167130	ENST00000406974	0	57171	DOLPP1	dolichyldiphosphatase 1
9	71910268	71911992	1725	*	.	1000	15.8657	6223.76	6218.56	999	Promoter (<=1kb)	454	71862452	71910931	48480	2	ENSG00000107362	ENST00000377041	0	51104	ABHD17B	abhydrolase domain containing 17B, depalmitoylase
8	11802036	11803459	1424	*	.	1000	17.4546	6221.55	6216.35	565	Promoter (<=1kb)	453	11802239	11821818	19580	1	ENSG00000079459	ENST00000530337	0	2222	FDFT1	farnesyl-diphosphate farnesyltransferase 1
7	108569190	108570717	1528	*	.	1000	17.6777	6221.1	6215.9	662	Promoter (<=1kb)	452	108569867	108572063	2197	1	ENSG00000128590	ENST00000491582	0	4189	DNAJB9	DnaJ heat shock protein family (Hsp40) member B9
17	17590796	17592612	1817	*	.	1000	16.4223	6219.35	6214.15	1048	Promoter (<=1kb)	462	17505563	17591679	86117	2	ENSG00000133027	ENST00000435340	0	10400	PEMT	phosphatidylethanolamine N-methyltransferase
14	49620126	49621611	1486	*	.	1000	17.2261	6213.46	6208.27	595	Promoter (<=1kb)	459	49618530	49620626	2097	2	ENSG00000165502	ENST00000298289	0	6166	RPL36AL	ribosomal protein L36a like
17	42387679	42389322	1644	*	.	1000	16.3897	6211.49	6206.29	869	Promoter (<=1kb)	462	42313324	42388442	75119	2	ENSG00000168610	ENST00000264657	0	6774	STAT3	signal transducer and activator of transcription 3
17	28335008	28336808	1801	*	.	1000	14.6845	6202.94	6197.74	688	Promoter (<=1kb)	462	28335602	28345255	9654	1	ENSG00000109079	ENST00000544907	0	7126	TNFAIP1	TNF alpha induced protein 1
12	109097209	109098811	1603	*	.	1000	15.1281	6187.34	6182.16	814	Promoter (<=1kb)	457	109097597	109110992	13396	1	ENSG00000076248	ENST00000242576	0	7374	UNG	uracil DNA glycosylase
12	50111456	50112910	1455	*	.	1000	12.2389	6184.2	6179.02	682	Promoter (<=1kb)	457	50112082	50120451	8370	1	ENSG00000178449	ENST00000317943	0	84987	COX14	cytochrome c oxidase assembly factor COX14
20	5119140	5120423	1284	*	.	1000	15.3713	6161.02	6155.84	909	Promoter (<=1kb)	465	5114953	5119958	5006	2	ENSG00000132646	ENST00000379143	0	5111	PCNA	proliferating cell nuclear antigen
5	149960277	149961298	1022	*	.	1000	12.9729	6158.27	6153.1	393	Promoter (<=1kb)	450	149960758	149987400	26643	1	ENSG00000155850	ENST00000286298	0	1836	SLC26A2	solute carrier family 26 member 2
2	31233720	31234627	908	*	.	1000	23.6532	6146.9	6141.73	267	Promoter (<=1kb)	447	31234152	31269451	35300	1	ENSG00000013016	ENST00000322054	0	30845	EHD3	EH domain containing 3
17	82021922	82023921	2000	*	.	1000	9.80869	6144.24	6139.07	1239	Promoter (<=1kb)	462	82023305	82031151	7847	1	ENSG00000169683	ENST00000306688	0	201255	LRRC45	leucine rich repeat containing 45
17	8435386	8436869	1484	*	.	1000	19.3225	6143.97	6138.81	547	Promoter (<=1kb)	462	8435852	8448635	12784	1	ENSG00000166579	ENST00000582665	0	81565	NDEL1	nudE neurodevelopment protein 1 like 1
3	5187231	5189296	2066	*	.	1000	16.2527	6140.93	6135.77	377	Promoter (<=1kb)	448	5187646	5208172	20527	1	ENSG00000134109	ENST00000434243	0	9695	EDEM1	ER degradation enhancing alpha-mannosidase like protein 1
15	72271949	72273217	1269	*	.	1000	19.2107	6138.49	6133.33	828	Promoter (<=1kb)	460	72241181	72272554	31374	2	ENSG00000137817	ENST00000569795	0	56965	PARP6	poly(ADP-ribose) polymerase family member 6
5	118987754	118989062	1309	*	.	1000	19.3573	6132.57	6127.41	900	Promoter (<=1kb)	450	118836074	118988547	152474	2	ENSG00000169570	ENST00000510708	0	285605	DTWD2	DTW domain containing 2
17	75393432	75394720	1289	*	.	1000	22.6245	6129.59	6124.43	560	Promoter (<=1kb)	462	75318076	75393656	75581	2	ENSG00000177885	ENST00000392563	0	2885	GRB2	growth factor receptor bound protein 2
3	98522118	98523379	1262	*	.	1000	18.8268	6123.98	6118.83	855	Promoter (<=1kb)	448	98497912	98522887	24976	2	ENSG00000080822	ENST00000502288	0	56650	CLDND1	claudin domain containing 1
12	124939104	124941000	1897	*	.	1000	9.73114	6123.4	6118.25	1048	Distal Intergenic	457	124935455	124935895	441	2	ENSG00000241129	ENST00000480427	-3209	644022	RPL22P19	ribosomal protein L22 pseudogene 19
14	73026614	73027614	1001	*	.	1000	21.6571	6116.21	6111.06	590	Promoter (<=1kb)	459	72969451	73027106	57656	2	ENSG00000165861	ENST00000553891	0	53349	ZFYVE1	zinc finger FYVE-type containing 1
8	119873417	119874875	1459	*	.	1000	20.4493	6114.58	6109.43	304	Promoter (<=1kb)	453	119873717	120050044	176328	1	ENSG00000155792	ENST00000523492	0	64798	DEPTOR	DEP domain containing MTOR interacting protein
2	207710595	207712373	1779	*	.	1000	17.5883	6110.4	6105.25	925	Promoter (<=1kb)	447	207711540	207754465	42926	1	ENSG00000163249	ENST00000392209	0	151195	CCNYL1	cyclin Y like 1
19	32372722	32374285	1564	*	.	1000	17.6591	6104.02	6098.88	1233	Intron (ENST00000311921/ENSG00000168813, intron 4 of 5)	464	32382032	32383248	1217	1	ENSG00000168813	ENST00000586664	-7747	22847	ZNF507	zinc finger protein 507
7	44606155	44607476	1322	*	.	1000	20.4287	6103.66	6098.52	694	Promoter (<=1kb)	452	44606572	44708230	101659	1	ENSG00000105953	ENST00000439616	0	4967	OGDH	oxoglutarate dehydrogenase
19	55165885	55167260	1376	*	.	1000	16.0088	6098.59	6093.46	784	Promoter (<=1kb)	464	55158661	55166722	8062	2	ENSG00000167646	ENST00000455045	0	352909	DNAAF3	dynein axonemal assembly factor 3
19	49766089	49767110	1022	*	.	1000	13.2277	6093.98	6088.84	433	Promoter (<=1kb)	464	49767001	49807114	40114	1	ENSG00000196961	ENST00000354293	0	160	AP2A1	adaptor related protein complex 2 subunit alpha 1
7	98251389	98252807	1419	*	.	1000	23.0876	6092.64	6087.5	862	Promoter (<=1kb)	452	98252379	98291524	39146	1	ENSG00000164713	ENST00000456357	0	25798	BRI3	brain protein I3
14	23285615	23286855	1241	*	.	1000	18.9972	6092.19	6087.05	649	Promoter (<=1kb)	459	23272422	23286132	13711	2	ENSG00000215271	ENST00000357460	0	57594	HOMEZ	homeobox and leucine zipper encoding
19	52189332	52190898	1567	*	.	1000	14.0872	6090.14	6085	458	Promoter (<=1kb)	464	52190048	52211483	21436	1	ENSG00000105568	ENST00000490868	0	5518	PPP2R1A	protein phosphatase 2 scaffold subunit Aalpha
10	46523108	46525472	2365	*	.	1000	8.31398	6089.67	6084.53	1682	Intron (ENST00000616785/ENSG00000285402, intron 3 of 3)	455	46541736	46555530	13795	2	ENSG00000204175	ENST00000374317	30058	9721	GPRIN2	G protein regulated inducer of neurite outgrowth 2
3	98900917	98902221	1305	*	.	1000	15.142	6088.84	6083.71	918	Promoter (<=1kb)	448	98795941	98901695	105755	2	ENSG00000057019	ENST00000326840	0	131566	DCBLD2	discoidin, CUB and LCCL domain containing 2
16	46883409	46884626	1218	*	.	1000	19.2796	6084.25	6079.12	839	Promoter (<=1kb)	461	46884362	46931289	46928	1	ENSG00000166123	ENST00000340124	0	84706	GPT2	glutamic--pyruvic transaminase 2
2	197452862	197454104	1243	*	.	1000	13.9561	6077.87	6072.74	606	Promoter (<=1kb)	447	197453493	197474168	20676	1	ENSG00000115520	ENST00000409398	0	80219	COQ10B	coenzyme Q10B
11	43680263	43681485	1223	*	.	1000	18.7666	6074.97	6069.84	295	Promoter (<=1kb)	456	43680680	43838374	157695	1	ENSG00000149084	ENST00000527433	0	51144	HSD17B12	hydroxysteroid 17-beta dehydrogenase 12
11	74170472	74171921	1450	*	.	1000	17.6515	6060.88	6055.76	675	Promoter (<=1kb)	456	74012718	74170792	158075	2	ENSG00000168014	ENST00000442398	0	26005	C2CD3	C2 domain containing 3 centriole elongation regulator
17	41785697	41787211	1515	*	.	1000	13.9263	6059.68	6054.56	1196	Promoter (<=1kb)	462	41754604	41786698	32095	2	ENSG00000173801	ENST00000310706	0	3728	JUP	junction plakoglobin
12	121351719	121352933	1215	*	.	1000	19.8486	6058.09	6052.97	774	Promoter (<=1kb)	457	121308245	121352411	44167	2	ENSG00000089053	ENST00000261819	0	51433	ANAPC5	anaphase promoting complex subunit 5
19	39030954	39032497	1544	*	.	1000	14.3865	6057.77	6052.65	758	Promoter (<=1kb)	464	39025412	39032063	6652	2	ENSG00000161243	ENST00000594770	0	126433	FBXO27	F-box protein 27
5	43312793	43313960	1168	*	.	1000	14.0126	6052.57	6047.46	957	Promoter (<=1kb)	450	43287470	43313412	25943	2	ENSG00000112972	ENST00000325110	0	3157	HMGCS1	3-hydroxy-3-methylglutaryl-CoA synthase 1
17	15699001	15700549	1549	*	.	1000	20.1786	6046.72	6041.6	589	Promoter (<=1kb)	462	15699577	15701300	1724	1	ENSG00000187607	ENST00000585207	0	57335	ZNF286A	zinc finger protein 286A
12	113220595	113222212	1618	*	.	1000	14.1499	6045.01	6039.9	789	Promoter (<=1kb)	457	113195441	113221094	25654	2	ENSG00000166578	ENST00000299732	0	115811	IQCD	IQ motif containing D
3	33439481	33441361	1881	*	.	1000	12.21	6044.31	6039.2	1056	Promoter (<=1kb)	448	33388336	33440405	52070	2	ENSG00000153560	ENST00000283629	0	7342	UBP1	upstream binding protein 1
10	99658599	99660237	1639	*	.	1000	19.701	6044.05	6038.94	758	Promoter (<=1kb)	455	99659509	99711241	51733	1	ENSG00000198018	ENST00000370489	0	57089	ENTPD7	ectonucleoside triphosphate diphosphohydrolase 7
2	65129412	65131044	1633	*	.	1000	15.2035	6042.78	6037.67	803	Promoter (<=1kb)	447	65070696	65130331	59636	2	ENSG00000138069	ENST00000649427	0	5861	RAB1A	RAB1A, member RAS oncogene family
17	75940517	75941706	1190	*	.	1000	20.8981	6042.51	6037.4	625	Promoter (<=1kb)	462	75909574	75941038	31465	2	ENSG00000188878	ENST00000586717	0	85302	FBF1	Fas binding factor 1
7	77797938	77799747	1810	*	.	1000	14.2857	6042.45	6037.33	556	Promoter (<=1kb)	452	77798792	77957503	158712	1	ENSG00000006576	ENST00000416283	0	57157	PHTF2	putative homeodomain transcription factor 2
15	64162512	64163942	1431	*	.	1000	16.0484	6041.64	6036.53	768	Promoter (<=1kb)	460	64155740	64162581	6842	2	ENSG00000166794	ENST00000680343	0	5479	PPIB	peptidylprolyl isomerase B
14	100192485	100193907	1423	*	.	1000	20.7758	6039.88	6034.77	576	Distal Intergenic	459	100143957	100159645	15689	2	ENSG00000168350	ENST00000305631	-32840	123099	DEGS2	delta 4-desaturase, sphingolipid 2
5	34914744	34916139	1396	*	.	1000	21.2952	6036.88	6031.78	851	Promoter (<=1kb)	450	34905260	34915504	10245	2	ENSG00000113456	ENST00000382038	0	5810	RAD1	RAD1 checkpoint DNA exonuclease
7	102748426	102749695	1270	*	.	1000	18.002	6032.24	6027.13	440	Promoter (<=1kb)	452	102748971	102779810	30840	1	ENSG00000222011	ENST00000481697	0	222234	FAM185A	family with sequence similarity 185 member A
2	231780587	231781804	1218	*	.	1000	17.2029	6017.56	6012.46	737	Promoter (<=1kb)	447	231781671	231807724	26054	1	ENSG00000144524	ENST00000410024	0	64708	COPS7B	COP9 signalosome subunit 7B
14	102524351	102525648	1298	*	.	1000	15.3225	6016	6010.9	452	Distal Intergenic	459	102539644	102539726	83	1	ENSG00000266015	ENST00000582498	-13996	100422954	MIR4309	microRNA 4309
7	7968330	7969525	1196	*	.	1000	21.5241	6013.79	6008.69	358	Promoter (<=1kb)	452	7968796	8089080	120285	1	ENSG00000106415	ENST00000223145	0	113263	GLCCI1	glucocorticoid induced 1
14	63641219	63642589	1371	*	.	1000	14.1846	6012.62	6007.53	824	Promoter (<=1kb)	459	63597039	63641861	44823	2	ENSG00000140006	ENST00000394942	0	112840	WDR89	WD repeat domain 89
2	231463678	231465507	1830	*	.	1000	13.54	6012.2	6007.1	854	Promoter (<=1kb)	447	231453531	231464484	10954	2	ENSG00000115053	ENST00000322723	0	4691	NCL	nucleolin
7	87344868	87346130	1263	*	.	1000	22.3153	6009.16	6004.06	689	Promoter (<=1kb)	452	87345664	87399794	54131	1	ENSG00000005469	ENST00000331536	0	54677	CROT	carnitine O-octanoyltransferase
12	53179869	53181476	1608	*	.	1000	17.062	6007.05	6001.96	713	Promoter (<=1kb)	457	53157663	53180596	22934	2	ENSG00000139631	ENST00000267085	0	51380	CSAD	cysteine sulfinic acid decarboxylase
14	59187816	59190239	2424	*	.	1000	15.2074	6004.78	5999.69	786	Promoter (<=1kb)	459	59188646	59266161	77516	1	ENSG00000100592	ENST00000556596	0	23002	DAAM1	dishevelled associated activator of morphogenesis 1
5	168578895	168580180	1286	*	.	1000	17.7581	6004.03	5998.94	895	Promoter (<=1kb)	450	168548495	168579368	30874	2	ENSG00000120137	ENST00000239231	0	79646	PANK3	pantothenate kinase 3
7	112449937	112451600	1664	*	.	1000	13.3852	6003.79	5998.69	367	Promoter (<=1kb)	452	112450049	112455855	5807	1	ENSG00000006652	ENST00000445335	0	3475	IFRD1	interferon related developmental regulator 1
2	186589430	186591232	1803	*	.	1000	16.0657	6001.04	5995.95	555	Promoter (<=1kb)	447	186590056	186680901	90846	1	ENSG00000138448	ENST00000261023	0	3685	ITGAV	integrin subunit alpha V
8	143608880	143610340	1461	*	.	1000	14.1936	5992.97	5987.88	837	Promoter (<=1kb)	453	143603210	143609575	6366	2	ENSG00000104524	ENST00000495276	0	65263	PYCR3	pyrroline-5-carboxylate reductase 3
11	66616069	66617545	1477	*	.	1000	16.6992	5991.78	5986.7	441	Promoter (<=1kb)	456	66616626	66627343	10718	1	ENSG00000239306	ENST00000393979	0	10432	RBM14	RNA binding motif protein 14
17	64918933	64920437	1505	*	.	1000	17.4244	5983.35	5978.27	594	Promoter (<=1kb)	462	64854130	64919478	65349	2	ENSG00000176809	ENST00000584306	0	374819	LRRC37A3	leucine rich repeat containing 37 member A3
12	75390637	75391639	1003	*	.	1000	22.4277	5980.49	5975.41	512	Promoter (<=1kb)	457	75391089	75432688	41600	1	ENSG00000180481	ENST00000550916	0	144321	GLIPR1L2	GLIPR1 like 2
1	193058495	193060249	1755	*	.	1000	15.1792	5973.35	5968.28	988	Promoter (<=1kb)	446	193059454	193091219	31766	1	ENSG00000116747	ENST00000432079	0	6738	RO60	Ro60, Y RNA binding protein
2	88690995	88692587	1593	*	.	1000	16.9319	5969.42	5964.35	624	Promoter (<=1kb)	447	88691673	88750929	59257	1	ENSG00000153574	ENST00000283646	0	22934	RPIA	ribose 5-phosphate isomerase A
2	96265228	96266653	1426	*	.	1000	15.6649	5967.87	5962.8	943	Promoter (<=1kb)	447	96248514	96265997	17484	2	ENSG00000135956	ENST00000258439	0	55654	TMEM127	transmembrane protein 127
2	11743967	11745412	1446	*	.	1000	13.9399	5966.56	5961.49	263	Promoter (<=1kb)	447	11740997	11745301	4305	2	ENSG00000230790	ENST00000431500	0	NA	NA	NA
7	7639997	7641566	1570	*	.	1000	18.4276	5963.16	5958.09	639	Promoter (<=1kb)	452	7636927	7640816	3890	2	ENSG00000106399	ENST00000406109	0	6119	RPA3	replication protein A3
16	72008388	72009272	885	*	.	1000	22.7535	5959.47	5954.4	309	Promoter (<=1kb)	461	72008588	72027664	19077	1	ENSG00000102967	ENST00000572887	0	1723	DHODH	dihydroorotate dehydrogenase (quinone)
19	38374120	38375307	1188	*	.	1000	15.9861	5953.17	5948.1	552	Promoter (<=1kb)	464	38374550	38383823	9274	1	ENSG00000099341	ENST00000620216	0	5714	PSMD8	proteasome 26S subunit, non-ATPase 8
2	48314007	48315801	1795	*	.	1000	14.6844	5952.94	5947.87	333	Promoter (<=1kb)	447	48314637	48373328	58692	1	ENSG00000170802	ENST00000413569	0	3344	FOXN2	forkhead box N2
12	56333292	56334823	1532	*	.	1000	22.065	5952.06	5947	756	Promoter (<=1kb)	457	56334174	56340305	6132	1	ENSG00000110944	ENST00000622119	0	51561	IL23A	interleukin 23 subunit alpha
2	85595056	85596252	1197	*	.	1000	17.8804	5951.73	5946.67	601	Promoter (<=1kb)	447	85595725	85597016	1292	1	ENSG00000168894	ENST00000461845	0	51255	RNF181	ring finger protein 181
11	4607714	4608694	981	*	.	1000	22.5772	5947.45	5942.39	543	Promoter (<=1kb)	456	4598672	4608231	9560	2	ENSG00000167333	ENST00000300747	0	55128	TRIM68	tripartite motif containing 68
17	49414408	49415836	1429	*	.	1000	22.09	5945.77	5940.71	555	Promoter (<=1kb)	462	49404052	49414802	10751	2	ENSG00000167085	ENST00000511832	0	5245	PHB	prohibitin
9	120842459	120843561	1103	*	.	1000	20.4614	5935.77	5930.71	571	Promoter (<=1kb)	454	120816053	120842922	26870	2	ENSG00000095261	ENST00000210313	0	5711	PSMD5	proteasome 26S subunit, non-ATPase 5
19	32674754	32676661	1908	*	.	1000	12.4239	5934.26	5929.21	480	Promoter (<=1kb)	464	32597006	32675180	78175	2	ENSG00000105186	ENST00000306065	0	84079	ANKRD27	ankyrin repeat domain 27
3	131381059	131382403	1345	*	.	1000	21.5986	5925.62	5920.57	673	Promoter (<=1kb)	448	131381671	131388830	7160	1	ENSG00000198585	ENST00000537561	0	131870	NUDT16	nudix hydrolase 16
17	18362591	18363942	1352	*	.	1000	23.0641	5924.11	5919.06	997	Promoter (<=1kb)	462	18327860	18363563	35704	2	ENSG00000176974	ENST00000352886	0	6470	SHMT1	serine hydroxymethyltransferase 1
9	127396426	127397604	1179	*	.	1000	14.0827	5919.17	5914.12	489	Promoter (<=1kb)	454	127397138	127407855	10718	1	ENSG00000136856	ENST00000610552	0	29988	SLC2A8	solute carrier family 2 member 8
22	15784404	15785859	1456	*	.	1000	19.1519	5916.3	5911.26	526	Promoter (<=1kb)	467	15784959	15827434	42476	1	ENSG00000206195	ENST00000413768	0	503637	DUXAP8	double homeobox A pseudogene 8
7	133081176	133082744	1569	*	.	1000	20.919	5915.57	5910.53	1048	Promoter (<=1kb)	452	132784870	133082090	297221	2	ENSG00000106554	ENST00000262570	0	54927	CHCHD3	coiled-coil-helix-coiled-coil-helix domain containing 3
2	86194852	86196171	1320	*	.	1000	13.1355	5908.11	5903.07	229	Promoter (<=1kb)	447	86143932	86195002	51071	2	ENSG00000132305	ENST00000254636	0	10989	IMMT	inner membrane mitochondrial protein
5	72307671	72308884	1214	*	.	1000	20.4145	5907.97	5902.93	734	Promoter (<=1kb)	450	72238025	72307962	69938	2	ENSG00000113048	ENST00000519143	0	23107	MRPS27	mitochondrial ribosomal protein S27
1	206202378	206204369	1992	*	.	1000	9.63225	5907.91	5902.87	817	Promoter (<=1kb)	446	206186179	206202839	16661	2	ENSG00000196550	ENST00000367128	0	729533	FAM72A	family with sequence similarity 72 member A
2	24075854	24077307	1454	*	.	1000	12.6583	5906.75	5901.71	654	Promoter (<=1kb)	447	24067586	24076326	8741	2	ENSG00000115128	ENST00000233468	0	51639	SF3B6	splicing factor 3b subunit 6
7	107168051	107170248	2198	*	.	1000	13.4294	5899.32	5894.28	606	Promoter (<=1kb)	452	107168961	107202508	33548	1	ENSG00000105856	ENST00000468410	0	26959	HBP1	HMG-box transcription factor 1
7	150378796	150380198	1403	*	.	1000	15.3533	5897.46	5892.42	458	Promoter (<=1kb)	452	150379330	150398630	19301	1	ENSG00000196456	ENST00000329630	0	285971	ZNF775	zinc finger protein 775
11	66051640	66052839	1200	*	.	1000	18.0869	5895.25	5890.22	557	Promoter (<=1kb)	456	66052331	66069308	16978	1	ENSG00000087365	ENST00000528302	0	10992	SF3B2	splicing factor 3b subunit 2
7	149028135	149029269	1135	*	.	1000	15.6966	5894.39	5889.36	529	Promoter (<=1kb)	452	149003062	149028505	25444	2	ENSG00000155660	ENST00000652332	0	9601	PDIA4	protein disulfide isomerase family A member 4
17	28570809	28571993	1185	*	.	1000	17.7278	5889.96	5884.93	782	Promoter (<=1kb)	462	28553383	28571528	18146	2	ENSG00000087111	ENST00000268758	0	94005	PIGS	phosphatidylinositol glycan anchor biosynthesis class S
9	130712384	130713647	1264	*	.	1000	17.0599	5886.5	5881.47	357	Promoter (<=1kb)	454	130713016	130885683	172668	1	ENSG00000097007	ENST00000372348	0	25	ABL1	ABL proto-oncogene 1, non-receptor tyrosine kinase
11	1388872	1390031	1160	*	.	1000	18.5156	5885.16	5880.13	871	Promoter (<=1kb)	456	1389899	1462685	72787	1	ENSG00000174672	ENST00000308219	0	9024	BRSK2	BR serine/threonine kinase 2
12	39442132	39444172	2041	*	.	1000	14.4205	5882.01	5876.98	1226	Promoter (<=1kb)	457	39293228	39443120	149893	2	ENSG00000139116	ENST00000361418	0	55605	KIF21A	kinesin family member 21A
12	48681490	48682874	1385	*	.	1000	17.2597	5878.36	5873.34	832	Promoter (<=1kb)	457	48653211	48682238	29028	2	ENSG00000139620	ENST00000420613	0	54934	KANSL2	KAT8 regulatory NSL complex subunit 2
8	109539261	109540672	1412	*	.	1000	16.0254	5877.69	5872.67	354	Promoter (<=1kb)	453	109539711	109565160	25450	1	ENSG00000147654	ENST00000395785	0	9166	EBAG9	estrogen receptor binding site associated antigen 9
12	53726935	53728230	1296	*	.	1000	22.5464	5869.74	5864.72	636	Promoter (<=1kb)	457	53708517	53727452	18936	2	ENSG00000012822	ENST00000550804	0	57658	CALCOCO1	calcium binding and coiled-coil domain 1
1	85275880	85277097	1218	*	.	1000	17.7889	5867.95	5862.93	760	Promoter (<=1kb)	446	85265776	85276632	10857	2	ENSG00000142867	ENST00000648566	0	8915	BCL10	BCL10 immune signaling adaptor
1	172532110	172533851	1742	*	.	1000	14.022	5867.41	5862.39	968	Promoter (<=1kb)	446	172532349	172611833	79485	1	ENSG00000094975	ENST00000367723	0	51430	SUCO	SUN domain containing ossification factor
7	66996269	66997167	899	*	.	1000	14.9822	5867.05	5862.03	536	Promoter (<=1kb)	452	66996820	67017881	21062	1	ENSG00000198874	ENST00000442959	0	55253	TYW1	tRNA-yW synthesizing protein 1 homolog
10	3172068	3173695	1628	*	.	1000	16.8612	5865.33	5860.31	809	Promoter (<=1kb)	455	3137728	3172782	35055	2	ENSG00000107959	ENST00000224949	0	10531	PITRM1	pitrilysin metallopeptidase 1
7	107743092	107744689	1598	*	.	1000	16.3108	5862.33	5857.31	654	Promoter (<=1kb)	452	107743949	107749316	5368	1	ENSG00000105879	ENST00000479443	0	79872	CBLL1	Cbl proto-oncogene like 1
10	95693087	95694399	1313	*	.	1000	21.5932	5861.45	5856.44	929	Promoter (<=1kb)	455	95659823	95693952	34130	2	ENSG00000119977	ENST00000680353	0	26123	TCTN3	tectonic family member 3
2	65055679	65057089	1411	*	.	1000	18.1658	5861	5855.98	575	Promoter (<=1kb)	447	65056366	65071844	15479	1	ENSG00000011523	ENST00000475851	0	23177	CEP68	centrosomal protein 68
2	189783481	189784996	1516	*	.	1000	16.8927	5860.14	5855.13	917	Promoter (<=1kb)	447	189784085	189877628	93544	1	ENSG00000064933	ENST00000418224	0	5378	PMS1	PMS1 homolog 1, mismatch repair system component
15	64355319	64356959	1641	*	.	1000	18.2342	5849.55	5844.54	894	Promoter (<=1kb)	460	64165525	64356173	190649	2	ENSG00000169118	ENST00000303052	0	53944	CSNK1G1	casein kinase 1 gamma 1
14	53217120	53218150	1031	*	.	1000	22.8314	5848.67	5843.66	471	Promoter (<=1kb)	459	53217655	53720974	503320	1	ENSG00000237356	ENST00000663444	0	NA	NA	NA
19	35716282	35717957	1676	*	.	1000	10.6749	5846.92	5841.91	1316	Promoter (<=1kb)	464	35717973	35738880	20908	1	ENSG00000272333	ENST00000673918	-16	9757	KMT2B	lysine methyltransferase 2B
16	2881999	2883917	1919	*	.	1000	16.4523	5835.46	5830.46	750	Promoter (<=1kb)	461	2883213	2899382	16170	1	ENSG00000162076	ENST00000293981	0	114984	FLYWCH2	FLYWCH family member 2
2	61763684	61764888	1205	*	.	1000	17.1991	5831.76	5826.76	704	Promoter (<=1kb)	447	61728808	61764201	35394	2	ENSG00000289410	ENST00000689428	0	NA	NA	NA
12	122500173	122501629	1457	*	.	1000	14.799	5827.52	5822.52	817	Promoter (<=1kb)	457	122471599	122501073	29475	2	ENSG00000033030	ENST00000672018	0	55596	ZCCHC8	zinc finger CCHC-type containing 8
11	83071277	83072411	1135	*	.	1000	16.675	5825.46	5820.47	719	Promoter (<=1kb)	456	82973133	83071462	98330	2	ENSG00000137502	ENST00000612684	0	27314	RAB30	RAB30, member RAS oncogene family
2	24971102	24972470	1369	*	.	1000	15.8702	5823.07	5818.08	639	Promoter (<=1kb)	447	24943636	24972094	28459	2	ENSG00000115137	ENST00000534855	0	51277	DNAJC27	DnaJ heat shock protein family (Hsp40) member C27
10	89701062	89701926	865	*	.	1000	21.0039	5821.1	5816.1	446	Promoter (<=1kb)	455	89701590	89774934	73345	1	ENSG00000138182	ENST00000371728	0	9585	KIF20B	kinesin family member 20B
5	141923242	141924428	1187	*	.	1000	18.5557	5820.95	5815.95	558	Promoter (<=1kb)	450	141923855	141940120	16266	1	ENSG00000081791	ENST00000194118	0	9812	DELE1	DAP3 binding cell death enhancer 1
12	56359815	56360893	1079	*	.	1000	18.2017	5819.01	5814.02	485	Promoter (<=1kb)	457	56341597	56360107	18511	2	ENSG00000170581	ENST00000314128	0	6773	STAT2	signal transducer and activator of transcription 2
7	42931719	42933482	1764	*	.	1000	24.7853	5810.69	5805.7	582	Promoter (<=1kb)	452	42916861	42932174	15314	2	ENSG00000106588	ENST00000223321	0	5683	PSMA2	proteasome 20S subunit alpha 2
2	27369661	27371545	1885	*	.	1000	12.7945	5809.24	5804.25	699	Promoter (<=1kb)	447	27364352	27370338	5987	2	ENSG00000115211	ENST00000347454	0	8890	EIF2B4	eukaryotic translation initiation factor 2B subunit delta
5	160118659	160120186	1528	*	.	1000	15.075	5808.07	5803.08	973	Promoter (<=1kb)	450	160075882	160119423	43542	2	ENSG00000170234	ENST00000456329	0	114825	PWWP2A	PWWP domain containing 2A
3	121749142	121750165	1024	*	.	1000	18.6763	5804.63	5799.64	646	Promoter (<=1kb)	448	121663199	121749755	86557	2	ENSG00000173230	ENST00000340645	0	2804	GOLGB1	golgin B1
19	40750376	40751906	1531	*	.	1000	11.4214	5803.79	5798.8	306	Promoter (<=1kb)	464	40750637	40765021	14385	1	ENSG00000077312	ENST00000601545	0	6626	SNRPA	small nuclear ribonucleoprotein polypeptide A
5	146181933	146183397	1465	*	.	1000	18.2991	5799.96	5794.97	771	Promoter (<=1kb)	450	146110566	146182475	71910	2	ENSG00000133706	ENST00000674158	0	51520	LARS1	leucyl-tRNA synthetase 1
7	44123157	44124479	1323	*	.	1000	19.0868	5798.1	5793.12	497	Promoter (<=1kb)	452	44114680	44123548	8869	2	ENSG00000106628	ENST00000610533	0	5425	POLD2	DNA polymerase delta 2, accessory subunit
9	127244677	127245835	1159	*	.	1000	26.2031	5796.89	5791.9	585	Promoter (<=1kb)	454	127245337	127320778	75442	1	ENSG00000136895	ENST00000478702	0	84253	GARNL3	GTPase activating Rap/RanGAP domain like 3
5	179559026	179560388	1363	*	.	1000	22.0444	5793.55	5788.57	581	Promoter (<=1kb)	450	179559692	179562922	3231	1	ENSG00000176783	ENST00000507569	0	80230	RUFY1	RUN and FYVE domain containing 1
19	41958295	41959771	1477	*	.	1000	10.4841	5793.48	5788.5	1112	Promoter (<=1kb)	464	41956681	41959266	2586	2	ENSG00000105404	ENST00000600292	0	10567	RABAC1	Rab acceptor 1
19	54136760	54137857	1098	*	.	1000	11.3039	5790.21	5785.23	499	Promoter (<=1kb)	464	54137749	54145698	7950	1	ENSG00000088038	ENST00000644245	0	4849	CNOT3	CCR4-NOT transcription complex subunit 3
7	128738747	128739973	1227	*	.	1000	19.0893	5789.78	5784.8	514	Promoter (<=1kb)	452	128739292	128771477	32186	1	ENSG00000128595	ENST00000535011	0	813	CALU	calumenin
7	112939265	112940655	1391	*	.	1000	19.4397	5789.75	5784.77	757	Promoter (<=1kb)	452	112819147	112939875	120729	2	ENSG00000164603	ENST00000297145	0	154743	BMT2	base methyltransferase of 25S rRNA 2 homolog
17	76671044	76672225	1182	*	.	1000	19.3407	5780.21	5775.24	774	Promoter (<=1kb)	462	76671942	76673658	1717	1	ENSG00000261335	ENST00000565271	0	105274304	LOC105274304	uncharacterized LOC105274304
17	32443843	32445420	1578	*	.	1000	16.193	5777.44	5772.47	593	Promoter (<=1kb)	462	32444379	32464561	20183	1	ENSG00000108671	ENST00000578213	0	5717	PSMD11	proteasome 26S subunit, non-ATPase 11
2	32165160	32166324	1165	*	.	1000	20.9025	5772.9	5767.93	592	Promoter (<=1kb)	447	32165841	32224112	58272	1	ENSG00000152683	ENST00000357055	0	55676	SLC30A6	solute carrier family 30 member 6
1	246565818	246567116	1299	*	.	1000	16.6042	5765.91	5760.95	557	Promoter (<=1kb)	446	246540561	246566261	25701	2	ENSG00000162851	ENST00000366514	0	64216	TFB2M	transcription factor B2, mitochondrial
12	52068880	52070577	1698	*	.	1000	13.7291	5756.86	5751.9	761	Promoter (<=1kb)	457	52069246	52070415	1170	1	ENSG00000123395	ENST00000547409	0	60673	ATG101	autophagy related 101
7	134458289	134459740	1452	*	.	1000	12.9805	5751.33	5746.38	895	Promoter (<=1kb)	452	134442356	134459100	16745	2	ENSG00000085662	ENST00000285930	0	231	AKR1B1	aldo-keto reductase family 1 member B
11	83156208	83157954	1747	*	.	1000	12.9359	5735.92	5730.97	617	Promoter (<=1kb)	456	83156988	83187451	30464	1	ENSG00000165494	ENST00000298281	0	51585	PCF11	PCF11 cleavage and polyadenylation factor subunit
5	157142202	157143859	1658	*	.	1000	21.5003	5733.43	5728.48	694	Promoter (<=1kb)	450	157142933	157222963	80031	1	ENSG00000113263	ENST00000521769	0	3702	ITK	IL2 inducible T cell kinase
10	104268217	104269438	1222	*	.	1000	21.872	5726.94	5721.99	858	Promoter (<=1kb)	455	104268873	104299417	30545	1	ENSG00000065621	ENST00000450629	0	119391	GSTO2	glutathione S-transferase omega 2
19	38303846	38305563	1718	*	.	1000	8.39989	5725.19	5720.24	1221	Promoter (<=1kb)	464	38304164	38305006	843	1	ENSG00000167644	ENST00000588605	0	64073	C19orf33	chromosome 19 open reading frame 33
12	116737758	116738658	901	*	.	1000	19.0075	5723.33	5718.39	453	Promoter (<=1kb)	457	116710171	116738069	27899	2	ENSG00000111412	ENST00000261318	0	79794	SPRING1	SREBF pathway regulator in golgi 1
20	63537043	63538475	1433	*	.	1000	13.7276	5721.24	5716.3	829	Promoter (<=1kb)	465	63528001	63537376	9376	2	ENSG00000101213	ENST00000542869	0	5753	PTK6	protein tyrosine kinase 6
12	78863471	78865501	2031	*	.	1000	14.984	5714.89	5709.95	1185	Promoter (<=1kb)	457	78863993	79450279	586287	1	ENSG00000067715	ENST00000393240	0	6857	SYT1	synaptotagmin 1
X	47650167	47651383	1217	*	.	1000	18.1766	5709	5704.07	573	Promoter (<=1kb)	468	47635521	47650488	14968	2	ENSG00000126767	ENST00000247161	0	2002	ELK1	ETS transcription factor ELK1
16	87950272	87951669	1398	*	.	1000	18.6313	5708.56	5703.62	764	Promoter (<=1kb)	461	87950436	87981049	30614	1	ENSG00000172530	ENST00000423252	0	54971	BANP	BTG3 associated nuclear protein
10	104231540	104232970	1431	*	.	1000	23.3038	5708.31	5703.38	875	Promoter (<=1kb)	455	104129888	104232364	102477	2	ENSG00000197748	ENST00000357060	0	80217	CFAP43	cilia and flagella associated protein 43
11	85627320	85628916	1597	*	.	1000	20.111	5705.95	5701.02	1129	Promoter (<=1kb)	456	83455173	85627344	2172172	2	ENSG00000150672	ENST00000376104	0	1740	DLG2	discs large MAGUK scaffold protein 2
2	68466849	68467979	1131	*	.	1000	17.9942	5705.65	5700.72	549	Promoter (<=1kb)	447	68467572	68579257	111686	1	ENSG00000169621	ENST00000529851	0	200558	APLF	aprataxin and PNKP like factor
17	44774649	44776368	1720	*	.	1000	11.1733	5697.49	5692.56	1104	Promoter (<=1kb)	462	44775558	44777802	2245	1	ENSG00000073670	ENST00000588363	0	4185	ADAM11	ADAM metallopeptidase domain 11
19	36053791	36055574	1784	*	.	1000	10.1945	5693.9	5688.97	1050	Promoter (<=1kb)	464	36054649	36093142	38494	1	ENSG00000075702	ENST00000680489	0	284403	WDR62	WD repeat domain 62
14	21455629	21457000	1372	*	.	1000	20.6234	5689.7	5684.78	538	Promoter (<=1kb)	459	21385199	21456123	70925	2	ENSG00000100888	ENST00000646647	0	57680	CHD8	chromodomain helicase DNA binding protein 8
16	56450860	56452067	1208	*	.	1000	21.7338	5687.59	5682.66	594	Promoter (<=1kb)	461	56451521	56466183	14663	1	ENSG00000087263	ENST00000569802	0	55239	OGFOD1	2-oxoglutarate and iron dependent oxygenase domain containing 1
7	44082158	44083127	970	*	.	1000	16.9523	5685.82	5680.9	490	Promoter (<=1kb)	452	44072062	44082530	10469	2	ENSG00000122678	ENST00000242248	0	27434	POLM	DNA polymerase mu
17	27332104	27333444	1341	*	.	1000	16.5792	5684.44	5679.52	918	Promoter (<=1kb)	462	27333241	27348487	15247	1	ENSG00000266313	ENST00000666005	0	NA	NA	NA
12	66169071	66170490	1420	*	.	1000	18.8943	5682.02	5677.1	607	Promoter (<=1kb)	457	66135846	66169996	34151	2	ENSG00000155957	ENST00000358230	0	51643	TMBIM4	transmembrane BAX inhibitor motif containing 4
17	81665784	81667447	1664	*	.	1000	17.796	5675.78	5670.86	880	Promoter (<=1kb)	462	81666737	81673899	7163	1	ENSG00000185298	ENST00000329214	0	339230	CCDC137	coiled-coil domain containing 137
15	84600272	84601407	1136	*	.	1000	16.1309	5675.72	5670.8	661	Promoter (<=1kb)	460	84600986	84620649	19664	1	ENSG00000176371	ENST00000540936	0	54993	ZSCAN2	zinc finger and SCAN domain containing 2
14	95534293	95535152	860	*	.	1000	16.079	5668.79	5663.87	490	Promoter (<=1kb)	459	95535050	95544714	9665	1	ENSG00000182512	ENST00000331334	0	51218	GLRX5	glutaredoxin 5
1	212857451	212859141	1691	*	.	1000	14.9886	5668.05	5663.14	749	Promoter (<=1kb)	446	212858275	212899363	41089	1	ENSG00000162769	ENST00000366971	0	28982	FLVCR1	FLVCR heme transporter 1
3	156554628	156555712	1085	*	.	1000	22.4809	5665.43	5660.52	578	Promoter (<=1kb)	448	156539553	156555117	15565	2	ENSG00000114850	ENST00000265044	0	6747	SSR3	signal sequence receptor subunit 3
11	62753565	62754659	1095	*	.	1000	17.7203	5663.14	5658.23	681	Promoter (<=1kb)	456	62750963	62754160	3198	2	ENSG00000185670	ENST00000394807	0	79842	ZBTB3	zinc finger and BTB domain containing 3
9	77176787	77178687	1901	*	.	1000	15.633	5659.18	5654.27	704	Promoter (<=1kb)	454	77177445	77417483	240039	1	ENSG00000197969	ENST00000376636	0	23230	VPS13A	vacuolar protein sorting 13 homolog A
14	74083998	74085423	1426	*	.	1000	16.1364	5658.29	5653.38	507	Promoter (<=1kb)	459	74056847	74084453	27607	2	ENSG00000119711	ENST00000553458	0	4329	ALDH6A1	aldehyde dehydrogenase 6 family member A1
12	98593003	98594492	1490	*	.	1000	18.4827	5655.85	5650.94	667	Promoter (<=1kb)	457	98593591	98606379	12789	1	ENSG00000075415	ENST00000401722	0	5250	SLC25A3	solute carrier family 25 member 3
2	55231598	55232962	1365	*	.	1000	15.9884	5654.83	5649.93	693	Promoter (<=1kb)	447	55231903	55235588	3686	1	ENSG00000143947	ENST00000402285	0	6233	RPS27A	ribosomal protein S27a
12	118135411	118136944	1534	*	.	1000	20.4401	5653.81	5648.91	637	Promoter (<=1kb)	457	118136124	118145584	9461	1	ENSG00000089220	ENST00000261313	0	5037	PEBP1	phosphatidylethanolamine binding protein 1
1	202348254	202349760	1507	*	.	1000	20.3364	5651.29	5646.39	397	Promoter (<=1kb)	446	202348699	202592702	244004	1	ENSG00000077157	ENST00000608999	0	4660	PPP1R12B	protein phosphatase 1 regulatory subunit 12B
9	107282479	107284300	1822	*	.	1000	16.8391	5648.01	5643.1	521	Promoter (<=1kb)	454	107283137	107306590	23454	1	ENSG00000119318	ENST00000419616	0	5887	RAD23B	RAD23 homolog B, nucleotide excision repair protein
17	3635615	3637302	1688	*	.	1000	15.6671	5645.84	5640.94	774	Promoter (<=1kb)	462	3636459	3661448	24990	1	ENSG00000040531	ENST00000673965	0	1497	CTNS	cystinosin, lysosomal cystine transporter
7	21426829	21428590	1762	*	.	1000	12.069	5644.18	5639.28	622	Promoter (<=1kb)	452	21428043	21477239	49197	1	ENSG00000105866	ENST00000432066	0	6671	SP4	Sp4 transcription factor
19	45717190	45718377	1188	*	.	1000	15.8194	5643.92	5639.02	298	Promoter (<=1kb)	464	45714387	45717381	2995	2	ENSG00000279407	ENST00000623179	0	NA	NA	NA
19	43668187	43670450	2264	*	.	1000	13.2864	5637.7	5632.8	714	Promoter (<=1kb)	464	43646095	43670166	24072	2	ENSG00000011422	ENST00000339082	0	5329	PLAUR	plasminogen activator, urokinase receptor
1	179953761	179955587	1827	*	.	1000	15.9811	5637.59	5632.69	951	Promoter (<=1kb)	446	179954773	179996963	42191	1	ENSG00000135837	ENST00000491495	0	9857	CEP350	centrosomal protein 350
11	77994388	77995362	975	*	.	1000	18.9388	5637.29	5632.39	545	Promoter (<=1kb)	456	77878720	77994668	115949	2	ENSG00000149262	ENST00000534064	0	92105	INTS4	integrator complex subunit 4
20	17681961	17682919	959	*	.	1000	14.9386	5635.77	5630.88	415	Promoter (<=1kb)	465	17613678	17682283	68606	2	ENSG00000125844	ENST00000377807	0	6238	RRBP1	ribosome binding protein 1
8	73008399	73009386	988	*	.	1000	22.5243	5635.59	5630.69	402	Promoter (<=1kb)	453	73008856	73025699	16844	1	ENSG00000147601	ENST00000678358	0	7013	TERF1	telomeric repeat binding factor 1
11	10807815	10809769	1955	*	.	1000	16.0561	5634.34	5629.44	1202	Promoter (<=1kb)	456	10797050	10807973	10924	2	ENSG00000110321	ENST00000526148	0	1982	EIF4G2	eukaryotic translation initiation factor 4 gamma 2
19	44890270	44891364	1095	*	.	1000	11.3883	5633.25	5628.35	519	Promoter (<=1kb)	464	44890569	44891525	957	1	ENSG00000130204	ENST00000589253	0	10452	TOMM40	translocase of outer mitochondrial membrane 40
5	7868256	7869842	1587	*	.	1000	25.7512	5631.53	5626.63	861	Promoter (<=1kb)	450	7869104	7900279	31176	1	ENSG00000124275	ENST00000513439	0	4552	MTRR	5-methyltetrahydrofolate-homocysteine methyltransferase reductase
2	38875149	38876778	1630	*	.	1000	22.9329	5626.66	5621.77	800	Promoter (<=1kb)	447	38797729	38875934	78206	2	ENSG00000163214	ENST00000457308	0	90957	DHX57	DExH-box helicase 57
7	143620113	143622002	1890	*	.	1000	16.6862	5626.34	5621.45	631	Promoter (<=1kb)	452	143620952	143725082	104131	1	ENSG00000170379	ENST00000444908	0	285966	TCAF2	TRPM8 channel associated factor 2
7	38177725	38178904	1180	*	.	1000	19.7177	5626.32	5621.43	423	Promoter (<=1kb)	452	38178245	38230669	52425	1	ENSG00000010270	ENST00000009041	0	83930	STARD3NL	STARD3 N-terminal like
16	50741319	50742369	1051	*	.	1000	20.6378	5625.72	5620.83	631	Promoter (<=1kb)	461	50742050	50796881	54832	1	ENSG00000083799	ENST00000569418	0	1540	CYLD	CYLD lysine 63 deubiquitinase
10	130109755	130111866	2112	*	.	1000	12.7798	5624.64	5619.75	1452	Promoter (<=1kb)	455	130020025	130110810	90786	2	ENSG00000237489	ENST00000643056	0	387723	C10orf143	chromosome 10 open reading frame 143
20	3045154	3046922	1769	*	.	1000	15.8187	5623.98	5619.09	851	Promoter (<=1kb)	465	3046052	3048250	2199	1	ENSG00000125901	ENST00000380325	0	64949	MRPS26	mitochondrial ribosomal protein S26
17	47970487	47971621	1135	*	.	1000	15.0502	5623.92	5619.03	558	Promoter (<=1kb)	462	47970534	47981772	11239	1	ENSG00000108465	ENST00000536708	0	80279	CDK5RAP3	CDK5 regulatory subunit associated protein 3
9	125143100	125144064	965	*	.	1000	23.3938	5623.55	5618.66	516	Promoter (<=1kb)	454	124942608	125143528	200921	2	ENSG00000173611	ENST00000336505	0	286205	SCAI	suppressor of cancer cell invasion
2	46616034	46617529	1496	*	.	1000	20.2265	5618.4	5613.51	1051	Promoter (<=1kb)	447	46616416	46625053	8638	1	ENSG00000119878	ENST00000486447	0	9419	CRIPT	CXXC repeat containing interactor of PDZ3 domain
19	34358750	34360105	1356	*	.	1000	14.125	5616.01	5611.13	620	Promoter (<=1kb)	464	34359480	34366802	7323	1	ENSG00000105220	ENST00000587521	0	2821	GPI	glucose-6-phosphate isomerase
2	61853670	61855487	1818	*	.	1000	12.1533	5613.58	5608.7	907	Promoter (<=1kb)	447	61824848	61854060	29213	2	ENSG00000170264	ENST00000404929	0	84140	FAM161A	FAM161 centrosomal protein A
17	21041826	21044208	2383	*	.	1000	14.1263	5607.34	5602.46	1583	Promoter (<=1kb)	462	20999596	21043011	43416	2	ENSG00000124422	ENST00000261497	0	23326	USP22	ubiquitin specific peptidase 22
12	22624617	22626278	1662	*	.	1000	18.4991	5606.03	5601.15	501	Promoter (<=1kb)	457	22625075	22685709	60635	1	ENSG00000139163	ENST00000671733	0	55500	ETNK1	ethanolamine kinase 1
3	38136802	38137793	992	*	.	1000	14.2454	5605.06	5600.18	451	Promoter (<=1kb)	448	38122710	38137242	14533	2	ENSG00000060971	ENST00000301810	0	30	ACAA1	acetyl-CoA acyltransferase 1
5	142769371	142771633	2263	*	.	1000	16.538	5598.71	5593.83	931	Promoter (<=1kb)	450	142770377	143229007	458631	1	ENSG00000145819	ENST00000645722	0	23092	ARHGAP26	Rho GTPase activating protein 26
7	77121641	77122908	1268	*	.	1000	19.8352	5591.51	5586.64	844	Promoter (<=1kb)	452	77122434	77254567	132134	1	ENSG00000135205	ENST00000415750	0	57639	CCDC146	coiled-coil domain containing 146
17	28040851	28042245	1395	*	.	1000	16.3454	5591.47	5586.59	774	Promoter (<=1kb)	462	28041737	28048324	6588	1	ENSG00000087095	ENST00000583517	0	51701	NLK	nemo like kinase
12	53625696	53626809	1114	*	.	1000	17.4148	5585.88	5581.01	401	Promoter (<=1kb)	457	53507856	53626370	118515	2	ENSG00000170653	ENST00000548446	0	11016	ATF7	activating transcription factor 7
12	49109818	49111513	1696	*	.	1000	19.2888	5585.08	5580.21	1139	Promoter (<=1kb)	457	49097136	49110681	13546	2	ENSG00000139636	ENST00000417750	0	55716	LMBR1L	limb development membrane protein 1 like
17	58517466	58518932	1467	*	.	1000	10.4253	5579.21	5574.34	654	Promoter (<=1kb)	462	58489529	58517851	28323	2	ENSG00000108389	ENST00000579925	0	9110	MTMR4	myotubularin related protein 4
7	10973547	10974912	1366	*	.	1000	17.013	5575.1	5570.24	192	Promoter (<=1kb)	452	10973872	11102646	128775	1	ENSG00000106443	ENST00000521747	0	9678	PHF14	PHD finger protein 14
12	32678911	32680042	1132	*	.	1000	16.2325	5575.05	5570.18	308	Promoter (<=1kb)	457	32679200	32745552	66353	1	ENSG00000087470	ENST00000452533	0	10059	DNM1L	dynamin 1 like
14	81533248	81534323	1076	*	.	1000	19.6783	5570.79	5565.93	792	Promoter (<=1kb)	459	81471547	81533853	62307	2	ENSG00000071537	ENST00000336735	0	6400	SEL1L	SEL1L adaptor subunit of ERAD E3 ubiquitin ligase
12	125049217	125050285	1069	*	.	1000	22.6545	5568.2	5563.34	489	Distal Intergenic	457	125056359	125056581	223	2	ENSG00000256093	ENST00000541494	6296	100131779	LOC100131779	translocase of outer mitochondrial membrane 6 homolog (yeast) pseudogene
5	179698088	179699478	1391	*	.	1000	13.6469	5563.57	5558.7	747	Promoter (<=1kb)	450	179698405	179731453	33049	1	ENSG00000127022	ENST00000680406	0	821	CANX	calnexin
15	22837552	22839174	1623	*	.	1000	16.329	5555.61	5550.75	938	Promoter (<=1kb)	460	22838644	22851665	13022	1	ENSG00000140157	ENST00000560205	0	81614	NIPA2	NIPA magnesium transporter 2
3	179562538	179563758	1221	*	.	1000	15.731	5553.41	5548.55	355	Promoter (<=1kb)	448	179562886	179588407	25522	1	ENSG00000136518	ENST00000450518	0	86	ACTL6A	actin like 6A
19	45862337	45863687	1351	*	.	1000	14.1117	5549	5544.14	928	Promoter (<=1kb)	464	45815410	45863147	47738	2	ENSG00000125755	ENST00000245934	0	8189	SYMPK	symplekin
20	13638231	13639504	1274	*	.	1000	22.2916	5546.17	5541.31	732	Promoter (<=1kb)	465	13389392	13638903	249512	2	ENSG00000089123	ENST00000480436	0	55617	TASP1	taspase 1
2	170928412	170930089	1678	*	.	1000	15.4402	5541.53	5536.68	652	Promoter (<=1kb)	447	170928464	170956514	28051	1	ENSG00000115806	ENST00000471559	0	26003	GORASP2	golgi reassembly stacking protein 2
7	101243895	101245440	1546	*	.	1000	16.2277	5540.49	5535.64	916	Promoter (<=1kb)	452	101239458	101245075	5618	2	ENSG00000214253	ENST00000449367	0	51024	FIS1	fission, mitochondrial 1
12	63843367	63845187	1821	*	.	1000	12.0651	5536.51	5531.67	499	Promoter (<=1kb)	457	63844700	64162217	317518	1	ENSG00000196935	ENST00000355086	0	57522	SRGAP1	SLIT-ROBO Rho GTPase activating protein 1
11	13276846	13278390	1545	*	.	1000	18.0216	5535.67	5530.82	687	Promoter (<=1kb)	456	13277639	13358440	80802	1	ENSG00000133794	ENST00000527998	0	406	ARNTL	aryl hydrocarbon receptor nuclear translocator like
2	61538057	61539119	1063	*	.	1000	11.4188	5530.52	5525.68	351	Promoter (<=1kb)	447	61477689	61538197	60509	2	ENSG00000082898	ENST00000677150	0	7514	XPO1	exportin 1
17	5418967	5420625	1659	*	.	1000	16.9509	5529.68	5524.84	759	Promoter (<=1kb)	462	5384833	5419662	34830	2	ENSG00000108559	ENST00000573584	0	4927	NUP88	nucleoporin 88
3	155853788	155855258	1471	*	.	1000	17.3052	5527.05	5522.21	694	Promoter (<=1kb)	448	155821024	155854427	33404	2	ENSG00000169359	ENST00000643144	0	9197	SLC33A1	solute carrier family 33 member 1
7	96321128	96322531	1404	*	.	1000	17.9063	5523.47	5518.63	1034	Promoter (<=1kb)	452	96120220	96322098	201879	2	ENSG00000004864	ENST00000265631	0	10165	SLC25A13	solute carrier family 25 member 13
12	103965263	103966496	1234	*	.	1000	18.3441	5522.82	5517.98	613	Promoter (<=1kb)	457	103965822	103982810	16989	1	ENSG00000139372	ENST00000436021	0	6996	TDG	thymine DNA glycosylase
2	32627338	32628603	1266	*	.	1000	21.1037	5518.58	5513.74	716	Promoter (<=1kb)	447	32628032	32640368	12337	1	ENSG00000018699	ENST00000448773	0	55622	TTC27	tetratricopeptide repeat domain 27
7	65750388	65751952	1565	*	.	1000	19.3334	5516.84	5512	584	Promoter (<=1kb)	452	65751037	65764225	13189	1	ENSG00000228409	ENST00000686363	0	NA	NA	NA
9	35731987	35733529	1543	*	.	1000	11.7234	5515.1	5510.26	536	Promoter (<=1kb)	454	35732598	35736860	4263	1	ENSG00000107175	ENST00000486056	0	10488	CREB3	cAMP responsive element binding protein 3
16	81095762	81097053	1292	*	.	1000	17.8779	5515	5510.16	736	Promoter (<=1kb)	461	81081945	81096395	14451	2	ENSG00000140905	ENST00000315467	0	2653	GCSH	glycine cleavage system protein H
19	51593753	51595068	1316	*	.	1000	23.2067	5508.81	5503.98	729	Promoter (<=1kb)	464	51594561	51601788	7228	1	ENSG00000269388	ENST00000598755	0	NA	NA	NA
19	36488837	36490306	1470	*	.	1000	16.3204	5508.23	5503.4	758	Promoter (<=1kb)	464	36445119	36489435	44317	2	ENSG00000186017	ENST00000434377	0	84924	ZNF566	zinc finger protein 566
3	33798131	33799435	1305	*	.	1000	17.5498	5501.14	5496.31	946	Promoter (<=1kb)	448	33798571	33869707	71137	1	ENSG00000170248	ENST00000457054	0	10015	PDCD6IP	programmed cell death 6 interacting protein
12	76763432	76765040	1609	*	.	1000	14.8352	5500.96	5496.13	568	Promoter (<=1kb)	457	76764103	76827016	62914	1	ENSG00000186908	ENST00000546778	0	23390	ZDHHC17	zinc finger DHHC-type palmitoyltransferase 17
2	63587829	63589401	1573	*	.	1000	15.4611	5500.79	5495.96	895	Promoter (<=1kb)	447	63588609	63597657	9049	1	ENSG00000014641	ENST00000485781	0	4190	MDH1	malate dehydrogenase 1
19	37370517	37371553	1037	*	.	1000	21.4178	5500.7	5495.87	495	Promoter (<=1kb)	464	37371061	37379692	8632	1	ENSG00000189164	ENST00000589615	0	84503	ZNF527	zinc finger protein 527
10	87341848	87343364	1517	*	.	1000	13.5563	5495.03	5490.2	777	Promoter (<=1kb)	455	87189773	87342389	152617	2	ENSG00000223482	ENST00000692417	0	728190	NUTM2A-AS1	NUTM2A antisense RNA 1
9	97632807	97634237	1431	*	.	1000	15.6859	5493.13	5488.3	719	Promoter (<=1kb)	454	97600080	97633368	33289	2	ENSG00000136925	ENST00000341170	0	158427	TSTD2	thiosulfate sulfurtransferase like domain containing 2
5	119267982	119269622	1641	*	.	1000	16.5846	5486.52	5481.7	668	Promoter (<=1kb)	450	119268692	119393394	124703	1	ENSG00000145779	ENST00000274456	0	25816	TNFAIP8	TNF alpha induced protein 8
11	64809765	64811223	1459	*	.	1000	20.8921	5486.03	5481.2	921	Promoter (<=1kb)	456	64803510	64810485	6976	2	ENSG00000133895	ENST00000377316	0	4221	MEN1	menin 1
19	58278245	58279790	1546	*	.	1000	16.8175	5485.01	5480.19	493	Promoter (<=1kb)	464	58278966	58315197	36232	1	ENSG00000267216	ENST00000591325	0	108903150	ZNF8-ERVK3-1	ZNF8-ERVK3-1 readthrough
17	59154442	59155848	1407	*	.	1000	12.3231	5482.48	5477.66	798	Promoter (<=1kb)	462	59155732	59193686	37955	1	ENSG00000068489	ENST00000578777	0	55771	PRR11	proline rich 11
7	127651166	127652626	1461	*	.	1000	15.5264	5481.44	5476.62	889	Promoter (<=1kb)	452	127652194	127687147	34954	1	ENSG00000197157	ENST00000463020	0	27044	SND1	staphylococcal nuclease and tudor domain containing 1
7	30504200	30505511	1312	*	.	1000	17.5575	5478.1	5473.28	783	Promoter (<=1kb)	452	30496621	30504829	8209	2	ENSG00000006625	ENST00000275428	0	79017	GGCT	gamma-glutamylcyclotransferase
12	104985317	104986983	1667	*	.	1000	22.6206	5476.21	5471.39	945	Promoter (<=1kb)	457	104986316	105017625	31310	1	ENSG00000151131	ENST00000552951	0	121053	NOPCHAP1	NOP protein chaperone 1
2	73070532	73072261	1730	*	.	1000	13.8102	5476.08	5471.26	862	Promoter (<=1kb)	447	72942036	73071712	129677	2	ENSG00000144040	ENST00000272433	0	94097	SFXN5	sideroflexin 5
1	201170316	201171647	1332	*	.	1000	19.3215	5469.77	5464.95	534	Promoter (<=1kb)	446	201134772	201171574	36803	2	ENSG00000116857	ENST00000367333	0	252839	TMEM9	transmembrane protein 9
12	123232516	123233933	1418	*	.	1000	15.8298	5468.27	5463.45	708	Promoter (<=1kb)	457	123154215	123233141	78927	2	ENSG00000051825	ENST00000606320	0	10198	MPHOSPH9	M-phase phosphoprotein 9
17	47941166	47942069	904	*	.	1000	20.9817	5457.71	5452.9	318	Promoter (<=1kb)	462	47941506	47946733	5228	1	ENSG00000108439	ENST00000583599	0	55163	PNPO	pyridoxamine 5'-phosphate oxidase
19	42219760	42220713	954	*	.	1000	11.426	5457.19	5452.38	503	Promoter (<=1kb)	464	42198613	42220123	21511	2	ENSG00000160570	ENST00000595337	0	162989	DEDD2	death effector domain containing 2
15	82809000	82810515	1516	*	.	1000	19.63	5454.29	5449.48	533	Promoter (<=1kb)	460	82809628	82836108	26481	1	ENSG00000156232	ENST00000286760	0	123720	WHAMM	WASP homolog associated with actin, golgi membranes and microtubules
10	114173598	114175093	1496	*	.	1000	22.0025	5451.77	5446.96	712	Promoter (<=1kb)	455	114120862	114174203	53342	2	ENSG00000165813	ENST00000369287	0	55088	CCDC186	coiled-coil domain containing 186
19	58304862	58305965	1104	*	.	1000	21.786	5450.75	5445.94	422	Promoter (<=1kb)	464	58305319	58315663	10345	1	ENSG00000142396	ENST00000413518	0	105372481	ERVK3-1	endogenous retrovirus group K3 member 1
19	46660700	46661774	1075	*	.	1000	13.7658	5450.24	5445.43	788	Promoter (<=1kb)	464	46647551	46661182	13632	2	ENSG00000197380	ENST00000391916	0	147906	DACT3	dishevelled binding antagonist of beta catenin 3
14	19336776	19338280	1505	*	.	1000	20.8077	5448.75	5443.94	928	Promoter (<=1kb)	459	19268853	19337669	68817	2	ENSG00000244306	ENST00000648085	0	503639	DUXAP10	double homeobox A pseudogene 10
17	74748163	74749612	1450	*	.	1000	14.8256	5448.53	5443.72	419	Promoter (<=1kb)	462	74748628	74769353	20726	1	ENSG00000109062	ENST00000262613	0	9368	SLC9A3R1	SLC9A3 regulator 1
20	18466669	18467986	1318	*	.	1000	20.3242	5447.44	5442.63	421	Promoter (<=1kb)	465	18383367	18467030	83664	2	ENSG00000089091	ENST00000377630	0	55184	DZANK1	double zinc ribbon and ankyrin repeat domains 1
14	77457143	77458812	1670	*	.	1000	16.3234	5441.91	5437.1	554	Promoter (<=1kb)	459	77457870	77469247	11378	1	ENSG00000100591	ENST00000555133	0	10598	AHSA1	activator of HSP90 ATPase activity 1
12	55828933	55830617	1685	*	.	1000	15.8746	5440.5	5435.7	763	Promoter (<=1kb)	457	55820985	55829587	8603	2	ENSG00000135392	ENST00000678005	0	85406	DNAJC14	DnaJ heat shock protein family (Hsp40) member C14
15	34969110	34970235	1126	*	.	1000	22.1127	5437.93	5433.13	688	Promoter (<=1kb)	460	34851782	34969742	117961	2	ENSG00000021776	ENST00000156471	0	9716	AQR	aquarius intron-binding spliceosomal factor
12	53379344	53380873	1530	*	.	1000	11.2657	5435.3	5430.49	495	Promoter (<=1kb)	457	53380176	53382577	2402	1	ENSG00000185591	ENST00000551969	0	6667	SP1	Sp1 transcription factor
5	96934693	96936978	2286	*	.	1000	10.5083	5434.74	5429.94	651	Promoter (<=1kb)	450	96935394	96937766	2373	1	ENSG00000113441	ENST00000395784	0	4012	LNPEP	leucyl and cystinyl aminopeptidase
17	21213501	21215154	1654	*	.	1000	15.5551	5432.49	5427.69	735	Promoter (<=1kb)	462	21197954	21213921	15968	2	ENSG00000178307	ENST00000584432	0	8834	TMEM11	transmembrane protein 11
12	95216720	95219035	2316	*	.	1000	11.7765	5432.17	5427.37	968	Promoter (<=1kb)	457	95217746	95257181	39436	1	ENSG00000028203	ENST00000549589	0	55591	VEZT	vezatin, adherens junctions transmembrane protein
11	13667857	13669544	1688	*	.	1000	13.7583	5431.69	5426.89	670	Promoter (<=1kb)	456	13668668	13732346	63679	1	ENSG00000197601	ENST00000354817	0	84188	FAR1	fatty acyl-CoA reductase 1
11	17276148	17277562	1415	*	.	1000	18.0322	5430.66	5425.86	438	Promoter (<=1kb)	456	17276731	17282870	6140	1	ENSG00000070081	ENST00000525637	0	4925	NUCB2	nucleobindin 2
14	64539495	64541044	1550	*	.	1000	14.1935	5427.89	5423.09	1118	Promoter (<=1kb)	459	64540741	64541575	835	1	ENSG00000126803	ENST00000554883	0	3306	HSPA2	heat shock protein family A (Hsp70) member 2
2	23925808	23927967	2160	*	.	1000	14.5513	5427.34	5422.54	1314	Promoter (<=1kb)	447	23748664	23927123	178460	2	ENSG00000119778	ENST00000238789	0	54454	ATAD2B	ATPase family AAA domain containing 2B
11	6234181	6235589	1409	*	.	1000	13.7776	5426.29	5421.5	739	Promoter (<=1kb)	456	6211345	6234636	23292	2	ENSG00000051009	ENST00000449352	0	84067	FHIP1B	FHF complex subunit HOOK interacting protein 1B
12	26937689	26939163	1475	*	.	1000	16.4358	5425.29	5420.5	721	Promoter (<=1kb)	457	26905181	26937981	32801	2	ENSG00000064102	ENST00000261191	0	55726	INTS13	integrator complex subunit 13
19	46850041	46851205	1165	*	.	1000	17.4393	5424.98	5420.19	851	Promoter (<=1kb)	464	46838136	46850777	12642	2	ENSG00000042753	ENST00000352203	0	1175	AP2S1	adaptor related protein complex 2 subunit sigma 1
1	161165713	161167289	1577	*	.	1000	15.1204	5424.81	5420.02	671	Promoter (<=1kb)	446	161166056	161168095	2040	1	ENSG00000143224	ENST00000652729	0	5498	PPOX	protoporphyrinogen oxidase
17	55750638	55751711	1074	*	.	1000	18.1251	5424.71	5419.91	400	Promoter (<=1kb)	462	55751051	55777374	26324	1	ENSG00000141179	ENST00000268896	0	58488	PCTP	phosphatidylcholine transfer protein
15	89334211	89335844	1634	*	.	1000	12.837	5422.95	5418.16	675	Promoter (<=1kb)	460	89316305	89334817	18513	2	ENSG00000140521	ENST00000631044	0	5428	POLG	DNA polymerase gamma, catalytic subunit
5	177425725	177426806	1082	*	.	1000	13.1101	5416.69	5411.89	643	Promoter (<=1kb)	450	177426496	177433189	6694	1	ENSG00000198055	ENST00000511244	0	2870	GRK6	G protein-coupled receptor kinase 6
12	119876697	119877852	1156	*	.	1000	23.4667	5414.48	5409.69	688	Promoter (<=1kb)	457	119685791	119877288	191498	2	ENSG00000122966	ENST00000261833	0	11113	CIT	citron rho-interacting serine/threonine kinase
X	130902526	130903613	1088	*	.	1000	21.9836	5414.43	5409.64	733	Promoter (<=1kb)	468	130622325	130903209	280885	2	ENSG00000165675	ENST00000338144	0	10495	ENOX2	ecto-NOX disulfide-thiol exchanger 2
2	219228896	219230506	1611	*	.	1000	18.2555	5412.08	5407.29	809	Promoter (<=1kb)	447	219229783	219230756	974	1	ENSG00000163516	ENST00000464763	0	55139	ANKZF1	ankyrin repeat and zinc finger peptidyl tRNA hydrolase 1
8	144900747	144902662	1916	*	.	1000	12.7191	5408.74	5403.95	891	Promoter (<=1kb)	453	144876497	144901479	24983	2	ENSG00000196150	ENST00000528258	0	58500	ZNF250	zinc finger protein 250
2	238060243	238061904	1662	*	.	1000	16.6839	5406.14	5401.35	724	Promoter (<=1kb)	447	238060924	238099412	38489	1	ENSG00000132330	ENST00000651534	0	51540	SCLY	selenocysteine lyase
2	214808819	214810473	1655	*	.	1000	14.5304	5404.99	5400.2	1273	Promoter (<=1kb)	447	214725646	214809683	84038	2	ENSG00000138376	ENST00000260947	0	580	BARD1	BRCA1 associated RING domain 1
5	140646989	140648361	1373	*	.	1000	20.5631	5403.96	5399.17	708	Promoter (<=1kb)	450	140647058	140653073	6016	1	ENSG00000113141	ENST00000513256	0	3550	IK	IK cytokine
1	221741455	221743505	2051	*	.	1000	13.6001	5400.96	5396.18	763	Promoter (<=1kb)	446	221701424	221742089	40666	2	ENSG00000143507	ENST00000366899	0	11221	DUSP10	dual specificity phosphatase 10
20	21125255	21126692	1438	*	.	1000	17.8408	5400.01	5395.22	791	Promoter (<=1kb)	465	21125983	21246618	120636	1	ENSG00000088970	ENST00000619574	0	55857	KIZ	kizuna centrosomal protein
11	67239375	67240281	907	*	.	1000	16.2079	5398.26	5393.47	535	Promoter (<=1kb)	456	67240047	67256373	16327	1	ENSG00000173120	ENST00000530342	0	22992	KDM2A	lysine demethylase 2A
12	56315404	56316699	1296	*	.	1000	15.3563	5386.96	5382.18	662	Promoter (<=1kb)	457	56285916	56315943	30028	2	ENSG00000144785	ENST00000549318	0	NA	NA	NA
7	33128929	33130087	1159	*	.	1000	23.3216	5386.5	5381.72	612	Promoter (<=1kb)	452	33129244	33155667	26424	1	ENSG00000122507	ENST00000432983	0	27241	BBS9	Bardet-Biedl syndrome 9
14	20461078	20462114	1037	*	.	1000	16.9463	5382.08	5377.3	675	Promoter (<=1kb)	459	20457681	20461434	3754	2	ENSG00000165782	ENST00000250489	0	90809	PIP4P1	phosphatidylinositol-4,5-bisphosphate 4-phosphatase 1
19	40920589	40922142	1554	*	.	1000	13.046	5377.51	5372.74	816	Promoter (2-3kb)	464	40924219	40939517	15299	1	ENSG00000256612	ENST00000593298	-2077	1556	CYP2B7P	cytochrome P450 family 2 subfamily B member 7, pseudogene
7	104983250	104984879	1630	*	.	1000	15.6884	5375.22	5370.44	997	Promoter (<=1kb)	452	104981743	104983894	2152	2	ENSG00000228393	ENST00000687367	0	NA	NA	NA
14	21476282	21477699	1418	*	.	1000	20.7212	5374.23	5369.46	795	Promoter (<=1kb)	459	21476597	21488850	12254	1	ENSG00000092203	ENST00000416256	0	9878	TOX4	TOX high mobility group box family member 4
17	15650808	15652252	1445	*	.	1000	14.5312	5372.55	5367.78	1056	Promoter (<=1kb)	462	15571491	15651653	80163	2	ENSG00000251537	ENST00000455584	0	NA	NA	NA
19	48203678	48204779	1102	*	.	1000	19.1104	5370.11	5365.34	350	Promoter (<=1kb)	464	48180770	48203952	23183	2	ENSG00000105483	ENST00000600800	0	22900	CARD8	caspase recruitment domain family member 8
15	34101294	34102389	1096	*	.	1000	22.8646	5368.2	5363.43	738	Promoter (<=1kb)	460	34084017	34101862	17846	2	ENSG00000134153	ENST00000256545	0	56851	EMC7	ER membrane protein complex subunit 7
14	52729771	52730873	1103	*	.	1000	18.5434	5366.4	5361.64	371	Promoter (<=1kb)	459	52730166	52774989	44824	1	ENSG00000198252	ENST00000354586	0	6815	STYX	serine/threonine/tyrosine interacting protein
19	54158984	54160721	1738	*	.	1000	10.4416	5366.16	5361.39	898	Promoter (<=1kb)	464	54155161	54159721	4561	2	ENSG00000105617	ENST00000222224	0	79165	LENG1	leukocyte receptor cluster member 1
3	153160427	153162726	2300	*	.	1000	10.6419	5362.4	5357.63	945	Promoter (<=1kb)	448	153162226	153170627	8402	1	ENSG00000181467	ENST00000323534	0	5912	RAP2B	RAP2B, member of RAS oncogene family
17	10697028	10698032	1005	*	.	1000	21.5406	5362.35	5357.58	611	Promoter (<=1kb)	462	10672474	10697533	25060	2	ENSG00000133028	ENST00000255390	0	6341	SCO1	synthesis of cytochrome C oxidase 1
2	207528923	207530403	1481	*	.	1000	13.9529	5352.63	5347.87	1014	Promoter (<=1kb)	447	207529737	207597789	68053	1	ENSG00000118260	ENST00000430624	0	1385	CREB1	cAMP responsive element binding protein 1
16	88662908	88664166	1259	*	.	1000	19.2292	5350.13	5345.36	272	Promoter (<=1kb)	461	88651940	88663091	11152	2	ENSG00000167508	ENST00000301012	0	4597	MVD	mevalonate diphosphate decarboxylase
15	90954545	90955907	1363	*	.	1000	12.3931	5348.43	5343.67	290	Promoter (<=1kb)	460	90954881	90962324	7444	1	ENSG00000166965	ENST00000555155	0	91433	RCCD1	RCC1 domain containing 1
20	37178054	37179841	1788	*	.	1000	17.1574	5343.49	5338.73	970	Promoter (<=1kb)	465	37101226	37179548	78323	2	ENSG00000101353	ENST00000343811	0	140699	MROH8	maestro heat like repeat family member 8
16	75516317	75517855	1539	*	.	1000	19.0209	5342.56	5337.8	1092	Promoter (<=1kb)	461	75501693	75517260	15568	2	ENSG00000262583	ENST00000690952	0	NA	NA	NA
5	163437142	163438230	1089	*	.	1000	16.9787	5342.02	5337.26	281	Promoter (<=1kb)	450	163437569	163443729	6161	1	ENSG00000113328	ENST00000512163	0	900	CCNG1	cyclin G1
17	49191741	49193419	1679	*	.	1000	11.1596	5339.71	5334.95	1177	Distal Intergenic	462	49202791	49208912	6122	2	ENSG00000167083	ENST00000503070	15493	2793	GNGT2	G protein subunit gamma transducin 2
X	49190755	49191926	1172	*	.	1000	13.3607	5338.05	5333.29	622	Promoter (2-3kb)	468	49188163	49194614	6452	2	ENSG00000102003	ENST00000692723	2688	6855	SYP	synaptophysin
5	62403330	62404713	1384	*	.	1000	18.4837	5337.56	5332.8	655	Promoter (<=1kb)	450	62347284	62403929	56646	2	ENSG00000086189	ENST00000651114	0	27292	DIMT1	DIMT1 rRNA methyltransferase and ribosome maturation factor
3	101724253	101725590	1338	*	.	1000	18.4891	5334.88	5330.13	652	Promoter (<=1kb)	448	101724593	101759512	34920	1	ENSG00000182504	ENST00000489172	0	79598	CEP97	centrosomal protein 97
3	172750142	172751465	1324	*	.	1000	14.962	5334.83	5330.08	529	Promoter (<=1kb)	448	172750682	172821474	70793	1	ENSG00000114346	ENST00000232458	0	1894	ECT2	epithelial cell transforming 2
16	53502612	53504304	1693	*	.	1000	15.0996	5332.74	5327.98	990	Promoter (<=1kb)	461	53491040	53503209	12170	2	ENSG00000166971	ENST00000394657	0	64400	AKTIP	AKT interacting protein
2	18559603	18561067	1465	*	.	1000	18.8788	5331.31	5326.55	1142	Promoter (<=1kb)	447	18554723	18560653	5931	2	ENSG00000240857	ENST00000381249	0	57665	RDH14	retinol dehydrogenase 14
16	77190210	77191612	1403	*	.	1000	17.3886	5329.95	5325.2	662	Promoter (<=1kb)	461	77190835	77194360	3526	1	ENSG00000103111	ENST00000569610	0	22879	MON1B	MON1 homolog B, secretory trafficking associated
5	112976052	112977548	1497	*	.	1000	18.7707	5324.5	5319.75	641	Promoter (<=1kb)	450	112976702	113020123	43422	1	ENSG00000172795	ENST00000515408	0	167227	DCP2	decapping mRNA 2
7	77695797	77697608	1812	*	.	1000	17.6036	5323.8	5319.05	545	Promoter (<=1kb)	452	77696459	77783022	86564	1	ENSG00000187257	ENST00000334955	0	222194	RSBN1L	round spermatid basic protein 1 like
2	130341660	130343243	1584	*	.	1000	13.3934	5323.54	5318.79	1135	Promoter (<=1kb)	447	130337933	130342164	4232	2	ENSG00000136710	ENST00000259229	0	84317	CCDC115	coiled-coil domain containing 115
13	49443484	49444934	1451	*	.	1000	18.7558	5323.34	5318.59	727	Promoter (<=1kb)	458	49308650	49444064	135415	2	ENSG00000102547	ENST00000409308	0	81617	CAB39L	calcium binding protein 39 like
17	29292941	29294561	1621	*	.	1000	15.3303	5322.17	5317.42	1202	Promoter (<=1kb)	462	29255839	29294148	38310	2	ENSG00000108256	ENST00000225388	0	57532	NUFIP2	nuclear FMR1 interacting protein 2
8	65644247	65645417	1171	*	.	1000	15.7504	5321.34	5316.59	444	Promoter (<=1kb)	453	65644734	65704747	60014	1	ENSG00000066855	ENST00000523170	0	9650	MTFR1	mitochondrial fission regulator 1
2	38602161	38603741	1581	*	.	1000	12.6524	5316.72	5311.98	799	Promoter (<=1kb)	447	38561969	38602928	40960	2	ENSG00000143889	ENST00000449105	0	92906	HNRNPLL	heterogeneous nuclear ribonucleoprotein L like
3	105868272	105869721	1450	*	.	1000	15.6939	5316.22	5311.47	817	Promoter (<=1kb)	448	105655461	105869012	213552	2	ENSG00000114423	ENST00000394030	0	868	CBLB	Cbl proto-oncogene B
9	4984288	4985774	1487	*	.	1000	13.8465	5313.35	5308.61	500	Promoter (<=1kb)	454	4984390	5078444	94055	1	ENSG00000096968	ENST00000636127	0	3717	JAK2	Janus kinase 2
16	68310432	68311592	1161	*	.	1000	24.0884	5306.37	5301.63	529	Promoter (<=1kb)	461	68298034	68310946	12913	2	ENSG00000103061	ENST00000263997	0	84138	SLC7A6OS	solute carrier family 7 member 6 opposite strand
2	26243935	26245678	1744	*	.	1000	15.2453	5302.09	5297.35	731	Promoter (<=1kb)	447	26190635	26244632	53998	2	ENSG00000084754	ENST00000380649	0	3030	HADHA	hydroxyacyl-CoA dehydrogenase trifunctional multienzyme complex subunit alpha
2	200525751	200526747	997	*	.	1000	23.7734	5301.16	5296.42	320	Promoter (<=1kb)	447	200526167	200570142	43976	1	ENSG00000163535	ENST00000409203	0	151246	SGO2	shugoshin 2
3	15601044	15602499	1456	*	.	1000	16.077	5300.11	5295.37	621	Promoter (<=1kb)	448	15560699	15601569	40871	2	ENSG00000131373	ENST00000321169	0	26061	HACL1	2-hydroxyacyl-CoA lyase 1
17	11996735	11998054	1320	*	.	1000	18.5261	5299.74	5295	717	Promoter (<=1kb)	462	11977439	11997475	20037	2	ENSG00000154957	ENST00000580306	0	7566	ZNF18	zinc finger protein 18
19	58361909	58363204	1296	*	.	1000	13.7059	5298.45	5293.72	655	Promoter (<=1kb)	464	58354357	58362751	8395	2	ENSG00000174586	ENST00000311044	0	162968	ZNF497	zinc finger protein 497
17	73311863	73312628	766	*	.	1000	9.32798	5292.14	5287.4	214	Promoter (<=1kb)	462	73283624	73312001	28378	2	ENSG00000179604	ENST00000335793	0	23580	CDC42EP4	CDC42 effector protein 4
8	103414310	103415818	1509	*	.	1000	16.4597	5291.82	5287.09	874	Promoter (<=1kb)	453	103398635	103415171	16537	2	ENSG00000164933	ENST00000523256	0	81034	SLC25A32	solute carrier family 25 member 32
2	100562328	100563630	1303	*	.	1000	15.4173	5290.17	5285.44	514	Promoter (<=1kb)	447	100562993	100576739	13747	1	ENSG00000115539	ENST00000264254	0	79031	PDCL3	phosducin like 3
3	11846216	11847289	1074	*	.	1000	23.6372	5287.93	5283.2	733	Promoter (<=1kb)	448	11790442	11846885	56444	2	ENSG00000144559	ENST00000455809	0	132001	TAMM41	TAM41 mitochondrial translocator assembly and maintenance homolog
2	10812290	10813414	1125	*	.	1000	17.5075	5283.67	5278.94	554	Promoter (<=1kb)	447	10783391	10812785	29395	2	ENSG00000143870	ENST00000272227	0	10130	PDIA6	protein disulfide isomerase family A member 6
1	151145877	151147304	1428	*	.	1000	20.5563	5283.47	5278.74	873	Promoter (<=1kb)	446	151131685	151146457	14773	2	ENSG00000143434	ENST00000368912	0	10500	SEMA6C	semaphorin 6C
17	48892011	48893256	1246	*	.	1000	15.1273	5278.25	5273.53	575	Promoter (<=1kb)	462	48892765	48895871	3107	1	ENSG00000159199	ENST00000355938	0	516	ATP5MC1	ATP synthase membrane subunit c locus 1
17	3048388	3049538	1151	*	.	1000	19.6383	5276.54	5271.81	637	Distal Intergenic	462	3062669	3063607	939	2	ENSG00000262628	ENST00000575751	14069	8386	OR1D5	olfactory receptor family 1 subfamily D member 5
19	45177782	45179077	1296	*	.	1000	12.3839	5276.09	5271.36	834	Promoter (<=1kb)	464	45162928	45178237	15310	2	ENSG00000007255	ENST00000006275	0	79090	TRAPPC6A	trafficking protein particle complex subunit 6A
2	69436609	69438048	1440	*	.	1000	17.9288	5273.79	5269.06	897	Promoter (<=1kb)	447	69396113	69437628	41516	2	ENSG00000169599	ENST00000394305	0	27247	NFU1	NFU1 iron-sulfur cluster scaffold
5	109409032	109410840	1809	*	.	1000	12.0729	5272.72	5267.99	1094	Promoter (<=1kb)	450	109334722	109409974	75253	2	ENSG00000198961	ENST00000361189	0	9867	PJA2	praja ring finger ubiquitin ligase 2
19	48363015	48364624	1610	*	.	1000	13.6725	5272.28	5267.56	251	Promoter (<=1kb)	464	48364367	48376377	12011	1	ENSG00000105467	ENST00000344846	0	23546	SYNGR4	synaptogyrin 4
12	50166435	50167915	1481	*	.	1000	16.735	5270.13	5265.41	1031	Promoter (<=1kb)	457	50129289	50167369	38081	2	ENSG00000139624	ENST00000317551	0	91012	CERS5	ceramide synthase 5
10	97497697	97499671	1975	*	.	1000	13.2071	5269.98	5265.26	1149	Promoter (<=1kb)	455	97458324	97498388	40065	2	ENSG00000155229	ENST00000415383	0	64210	MMS19	MMS19 homolog, cytosolic iron-sulfur assembly component
8	42152365	42153701	1337	*	.	1000	17.2035	5269.59	5264.87	448	Promoter (<=1kb)	453	42152946	42171182	18237	1	ENSG00000070718	ENST00000518421	0	10947	AP3M2	adaptor related protein complex 3 subunit mu 2
16	19555045	19556498	1454	*	.	1000	17.8231	5267.03	5262.3	502	Promoter (<=1kb)	461	19555240	19579129	23890	1	ENSG00000103544	ENST00000544670	0	57020	VPS35L	VPS35 endosomal protein sorting factor like
7	72827870	72828783	914	*	.	1000	13.8253	5263.17	5258.45	355	Promoter (<=1kb)	452	72558744	72828174	269431	2	ENSG00000277149	ENST00000612372	0	441250	TYW1B	tRNA-yW synthesizing protein 1 homolog B
19	45994780	45995741	962	*	.	1000	17.6094	5258.61	5253.89	478	Promoter (<=1kb)	464	45995461	46018615	23155	1	ENSG00000104983	ENST00000536603	0	729440	CCDC61	coiled-coil domain containing 61
19	32404787	32406526	1740	*	.	1000	16.1552	5256.38	5251.66	830	Promoter (<=1kb)	464	32405543	32413187	7645	1	ENSG00000178904	ENST00000587077	0	147991	DPY19L3	dpy-19 like C-mannosyltransferase 3
19	35739755	35741405	1651	*	.	1000	8.73829	5255.51	5250.79	902	Promoter (<=1kb)	464	35739157	35741335	2179	2	ENSG00000126246	ENST00000592889	0	79713	IGFLR1	IGF like family receptor 1
2	70994718	70995733	1016	*	.	1000	18.4851	5251.29	5246.58	293	Promoter (<=1kb)	447	70985942	70994873	8932	2	ENSG00000144043	ENST00000272438	0	113419	TEX261	testis expressed 261
19	56140353	56141559	1207	*	.	1000	17.1622	5250.94	5246.23	434	Promoter (<=1kb)	464	56140951	56147128	6178	1	ENSG00000167685	ENST00000588358	0	55311	ZNF444	zinc finger protein 444
12	53370269	53371912	1644	*	.	1000	14.1058	5247.14	5242.42	1133	Distal Intergenic	457	53380176	53382577	2402	1	ENSG00000185591	ENST00000551969	-8264	6667	SP1	Sp1 transcription factor
14	103715149	103716048	900	*	.	1000	15.9659	5244.74	5240.03	378	Promoter (<=1kb)	459	103715730	103733668	17939	1	ENSG00000100711	ENST00000216602	0	79038	ZFYVE21	zinc finger FYVE-type containing 21
17	76264793	76265408	616	*	.	1000	16.4174	5243.77	5239.06	341	Promoter (<=1kb)	462	76265348	76271298	5951	1	ENSG00000185262	ENST00000327490	0	283991	UBALD2	UBA like domain containing 2
10	17200871	17201973	1103	*	.	1000	22.8077	5243.5	5238.79	568	Promoter (<=1kb)	455	17137336	17201672	64337	2	ENSG00000107614	ENST00000377799	0	1787	TRDMT1	tRNA aspartic acid methyltransferase 1
11	75814421	75815863	1443	*	.	1000	15.7578	5241.16	5236.45	708	Promoter (<=1kb)	456	75815210	76144232	329023	1	ENSG00000198382	ENST00000356136	0	7405	UVRAG	UV radiation resistance associated
17	75046149	75047363	1215	*	.	1000	18.1995	5240.92	5236.21	862	Promoter (<=1kb)	462	75038863	75046969	8107	2	ENSG00000167863	ENST00000301587	0	10476	ATP5PD	ATP synthase peripheral stalk subunit d
19	19775951	19777111	1161	*	.	1000	24.0225	5238.37	5233.66	576	Promoter (<=1kb)	464	19757366	19776393	19028	2	ENSG00000266904	ENST00000586645	0	NA	NA	NA
15	55407410	55408948	1539	*	.	1000	14.7297	5238.2	5233.49	996	Promoter (<=1kb)	460	55355239	55408359	53121	2	ENSG00000260916	ENST00000442196	0	9236	CCPG1	cell cycle progression 1
12	109572974	109573941	968	*	.	1000	19.9485	5236.33	5231.62	700	Promoter (<=1kb)	457	109573255	109581535	8281	1	ENSG00000110921	ENST00000539335	0	4598	MVK	mevalonate kinase
1	230978504	230979583	1080	*	.	1000	21.2666	5235.42	5230.71	458	Promoter (<=1kb)	446	230906243	230978859	72617	2	ENSG00000143643	ENST00000366662	0	79573	TTC13	tetratricopeptide repeat domain 13
20	23349725	23351613	1889	*	.	1000	12.1742	5235.24	5230.53	855	Promoter (<=1kb)	465	23350791	23354771	3981	1	ENSG00000132661	ENST00000254998	0	29107	NXT1	nuclear transport factor 2 like export factor 1
15	88546136	88547031	896	*	.	1000	20.605	5235.17	5230.46	568	Promoter (<=1kb)	460	88494440	88546645	52206	2	ENSG00000140543	ENST00000557842	0	55070	DET1	DET1 partner of COP1 E3 ubiquitin ligase
15	74872745	74874233	1489	*	.	1000	19.5655	5233.94	5229.23	337	Promoter (<=1kb)	460	74843730	74873365	29636	2	ENSG00000140497	ENST00000268099	0	10066	SCAMP2	secretory carrier membrane protein 2
7	108525370	108526789	1420	*	.	1000	12.5077	5233.77	5229.06	1019	Promoter (<=1kb)	452	108470417	108526135	55719	2	ENSG00000135241	ENST00000257694	0	50640	PNPLA8	patatin like phospholipase domain containing 8
3	136861494	136862965	1472	*	.	1000	18.5973	5233.08	5228.37	608	Promoter (<=1kb)	448	136862208	136949126	86919	1	ENSG00000158092	ENST00000288986	0	4690	NCK1	NCK adaptor protein 1
7	33062106	33063546	1441	*	.	1000	18.1738	5232.23	5227.52	1068	Promoter (<=1kb)	452	33014130	33062776	48647	2	ENSG00000122643	ENST00000610140	0	51251	NT5C3A	5'-nucleotidase, cytosolic IIIA
9	101397914	101399346	1433	*	.	1000	19.36	5229.88	5225.17	780	Promoter (<=1kb)	454	101398851	101410654	11804	1	ENSG00000136870	ENST00000339664	0	7743	ZNF189	zinc finger protein 189
16	67805912	67807403	1492	*	.	1000	15.9049	5228.9	5224.2	797	Promoter (<=1kb)	461	67806765	67828014	21250	1	ENSG00000102904	ENST00000415766	0	55815	TSNAXIP1	translin associated factor X interacting protein 1
17	63549658	63551445	1788	*	.	1000	14.2455	5227.14	5222.44	561	Promoter (<=1kb)	462	63550222	63594279	44058	1	ENSG00000136485	ENST00000431926	0	10238	DCAF7	DDB1 and CUL4 associated factor 7
17	78592102	78593227	1126	*	.	1000	15.8892	5225.46	5220.76	445	Distal Intergenic	462	78423697	78577396	153700	2	ENSG00000187775	ENST00000389840	-14706	8632	DNAH17	dynein axonemal heavy chain 17
15	82539772	82541420	1649	*	.	1000	14.5989	5221.77	5217.07	810	Promoter (<=1kb)	460	82536750	82540457	3708	2	ENSG00000182774	ENST00000647841	0	6218	RPS17	ribosomal protein S17
12	31728398	31729619	1222	*	.	1000	14.6507	5221.74	5217.03	599	Promoter (<=1kb)	457	31671142	31729021	57880	2	ENSG00000151743	ENST00000281471	0	196394	AMN1	antagonist of mitotic exit network 1 homolog
1	143971489	143973445	1957	*	.	1000	9.32508	5220.04	5215.34	818	Promoter (<=1kb)	446	143955287	143971986	16700	2	ENSG00000263513	ENST00000584486	0	554282	FAM72C	family with sequence similarity 72 member C
8	66428126	66430094	1969	*	.	1000	14.5813	5219.93	5215.23	710	Promoter (<=1kb)	453	66429014	66430733	1720	1	ENSG00000179041	ENST00000320270	0	23212	RRS1	ribosome biogenesis regulator 1 homolog
2	202634483	202635482	1000	*	.	1000	17.1321	5219.14	5214.44	416	Promoter (<=1kb)	447	202634969	202769757	134789	1	ENSG00000138439	ENST00000392238	0	150864	FAM117B	family with sequence similarity 117 member B
14	80941056	80942374	1319	*	.	1000	21.2036	5213.76	5209.06	726	Promoter (<=1kb)	459	80496479	80941738	445260	2	ENSG00000100629	ENST00000555265	0	145508	CEP128	centrosomal protein 128
9	15422079	15423615	1537	*	.	1000	18.5269	5212.44	5207.74	675	Promoter (<=1kb)	454	15422734	15465832	43099	1	ENSG00000164975	ENST00000610884	0	6619	SNAPC3	small nuclear RNA activating complex polypeptide 3
11	59615498	59616736	1239	*	.	1000	13.8925	5210.53	5205.83	435	Promoter (<=1kb)	456	59574398	59615774	41377	2	ENSG00000110048	ENST00000263847	0	5007	OSBP	oxysterol binding protein
1	243254830	243256407	1578	*	.	1000	12.1922	5209.47	5204.77	1151	Promoter (<=1kb)	446	243256034	243286397	30364	1	ENSG00000054282	ENST00000490065	0	10806	SDCCAG8	SHH signaling and ciliogenesis regulator SDCCAG8
3	168094738	168096678	1941	*	.	1000	14.0408	5206.49	5201.79	1285	Promoter (<=1kb)	448	168008689	168095924	87236	2	ENSG00000173905	ENST00000470487	0	27333	GOLIM4	golgi integral membrane protein 4
17	1684134	1685366	1233	*	.	1000	19.8961	5202.43	5197.74	781	Promoter (<=1kb)	462	1650629	1684867	34239	2	ENSG00000174231	ENST00000304992	0	10594	PRPF8	pre-mRNA processing factor 8
14	50311489	50313006	1518	*	.	1000	16.032	5201.58	5196.89	781	Promoter (<=1kb)	459	50237563	50312168	74606	2	ENSG00000087299	ENST00000261699	0	79944	L2HGDH	L-2-hydroxyglutarate dehydrogenase
1	154982838	154984190	1353	*	.	1000	21.2093	5200.71	5196.02	400	Promoter (<=1kb)	446	154983338	154988132	4795	1	ENSG00000160688	ENST00000492620	0	80308	FLAD1	flavin adenine dinucleotide synthetase 1
7	100148216	100149626	1411	*	.	1000	19.1005	5200.11	5195.42	513	Promoter (<=1kb)	452	100148912	100154203	5292	1	ENSG00000188186	ENST00000474141	0	389541	LAMTOR4	late endosomal/lysosomal adaptor, MAPK and MTOR activator 4
9	122930920	122932180	1261	*	.	1000	19.7294	5191.75	5187.06	712	Promoter (<=1kb)	454	122915566	122931512	15947	2	ENSG00000171448	ENST00000373656	0	57684	ZBTB26	zinc finger and BTB domain containing 26
7	135508997	135511172	2176	*	.	1000	15.2507	5191.11	5186.42	1230	Promoter (<=1kb)	452	135361795	135510080	148286	2	ENSG00000080802	ENST00000451834	0	4850	CNOT4	CCR4-NOT transcription complex subunit 4
16	13919341	13920664	1324	*	.	1000	18.2417	5189.79	5185.1	686	Promoter (<=1kb)	461	13920138	13952348	32211	1	ENSG00000175595	ENST00000682617	0	2072	ERCC4	ERCC excision repair 4, endonuclease catalytic subunit
1	155308292	155309824	1533	*	.	1000	17.0882	5188.6	5183.92	428	Promoter (<=1kb)	446	155308748	155320666	11919	1	ENSG00000160752	ENST00000611010	0	2224	FDPS	farnesyl diphosphate synthase
5	163505126	163506054	929	*	.	1000	14.6707	5188.19	5183.5	453	Promoter (<=1kb)	450	163505584	163517630	12047	1	ENSG00000038274	ENST00000421814	0	27430	MAT2B	methionine adenosyltransferase 2B
3	142148514	142150038	1525	*	.	1000	22.787	5187.67	5182.98	1033	Promoter (<=1kb)	448	141944428	142149544	205117	2	ENSG00000114126	ENST00000489671	0	7029	TFDP2	transcription factor Dp-2
17	49763920	49764640	721	*	.	1000	19.2439	5187.14	5182.45	346	Promoter (<=1kb)	462	49710332	49764131	53800	2	ENSG00000121104	ENST00000240364	0	81558	FAM117A	family with sequence similarity 117 member A
2	96208037	96209324	1288	*	.	1000	15.7765	5185.82	5181.13	886	Promoter (<=1kb)	447	96184859	96208827	23969	2	ENSG00000084090	ENST00000337288	0	56910	STARD7	StAR related lipid transfer domain containing 7
17	18780641	18781730	1090	*	.	1000	22.9321	5185.2	5180.52	576	Promoter (<=1kb)	462	18781111	18805895	24785	1	ENSG00000171928	ENST00000574294	0	51030	TVP23B	trans-golgi network vesicle protein 23 homolog B
16	74666372	74667637	1266	*	.	1000	22.4421	5180.85	5176.16	597	Promoter (<=1kb)	461	74621399	74666877	45479	2	ENSG00000168411	ENST00000361070	0	55159	RFWD3	ring finger and WD repeat domain 3
16	53703494	53704445	952	*	.	1000	21.2359	5179.92	5175.24	420	Promoter (<=1kb)	461	53598153	53703859	105707	2	ENSG00000103494	ENST00000647211	0	23322	RPGRIP1L	RPGRIP1 like
3	167734328	167735883	1556	*	.	1000	13.0052	5179.05	5174.37	806	Promoter (<=1kb)	448	167683298	167734892	51595	2	ENSG00000114209	ENST00000392750	0	11235	PDCD10	programmed cell death 10
19	38361261	38362803	1543	*	.	1000	11.8049	5176.14	5171.46	702	Promoter (<=1kb)	464	38361795	38362484	690	2	ENSG00000266963	ENST00000590304	0	NA	NA	NA
11	61361265	61362842	1578	*	.	1000	16.9971	5168.26	5163.58	987	Promoter (<=1kb)	456	61361964	61369149	7186	1	ENSG00000149483	ENST00000689076	0	51524	TMEM138	transmembrane protein 138
1	207751496	207753064	1569	*	.	1000	18.8335	5168.01	5163.33	486	Promoter (<=1kb)	446	207752054	207795504	43451	1	ENSG00000117335	ENST00000367042	0	4179	CD46	CD46 molecule
12	77064984	77066224	1241	*	.	1000	17.8693	5165.89	5161.21	659	Promoter (<=1kb)	457	77021248	77065563	44316	2	ENSG00000165891	ENST00000416496	0	144455	E2F7	E2F transcription factor 7
3	32106024	32107357	1334	*	.	1000	15.6856	5163.3	5158.62	460	Promoter (<=1kb)	448	32106612	32159615	53004	1	ENSG00000152642	ENST00000428684	0	23171	GPD1L	glycerol-3-phosphate dehydrogenase 1 like
1	33036000	33037223	1224	*	.	1000	24.0371	5162.57	5157.89	945	Promoter (<=1kb)	446	33007940	33036911	28972	2	ENSG00000004455	ENST00000629371	0	204	AK2	adenylate kinase 2
10	102713657	102715404	1748	*	.	1000	12.7782	5162.4	5157.73	810	Promoter (<=1kb)	455	102673731	102714397	40667	2	ENSG00000138175	ENST00000260746	0	403	ARL3	ADP ribosylation factor like GTPase 3
9	120868306	120869484	1179	*	.	1000	15.3256	5160.74	5156.07	467	Promoter (<=1kb)	454	120855652	120868911	13260	2	ENSG00000119403	ENST00000419155	0	26147	PHF19	PHD finger protein 19
7	27662088	27663298	1211	*	.	1000	17.2104	5159.86	5155.18	959	Promoter (<=1kb)	452	27525442	27662883	137442	2	ENSG00000106049	ENST00000265395	0	11112	HIBADH	3-hydroxyisobutyrate dehydrogenase
8	144326577	144327511	935	*	.	1000	12.0474	5159.06	5154.38	387	Promoter (<=1kb)	453	144314584	144326852	12269	2	ENSG00000185000	ENST00000528718	0	8694	DGAT1	diacylglycerol O-acyltransferase 1
2	74178109	74179532	1424	*	.	1000	18.4962	5156.91	5152.23	884	Promoter (<=1kb)	447	74152528	74178879	26352	2	ENSG00000114978	ENST00000396049	0	55233	MOB1A	MOB kinase activator 1A
15	64840940	64842350	1411	*	.	1000	15.8106	5153.56	5148.88	492	Promoter (<=1kb)	460	64841883	64868000	26118	1	ENSG00000241839	ENST00000616065	0	80301	PLEKHO2	pleckstrin homology domain containing O2
10	42637838	42639011	1174	*	.	1000	18.5104	5146.81	5142.14	455	Promoter (<=1kb)	455	42581594	42638553	56960	2	ENSG00000196693	ENST00000486187	0	7582	ZNF33B	zinc finger protein 33B
17	19647721	19649370	1650	*	.	1000	12.6032	5146.57	5141.9	1009	Promoter (<=1kb)	462	19648136	19677130	28995	1	ENSG00000072210	ENST00000581518	0	224	ALDH3A2	aldehyde dehydrogenase 3 family member A2
5	32312167	32313778	1612	*	.	1000	18.1068	5144.06	5139.39	1036	Promoter (<=1kb)	450	32226994	32312938	85945	2	ENSG00000150712	ENST00000280285	0	54545	MTMR12	myotubularin related protein 12
2	172084358	172086079	1722	*	.	1000	15.2864	5143.74	5139.07	1006	Promoter (<=1kb)	447	172084740	172086854	2115	1	ENSG00000144355	ENST00000361609	0	1745	DLX1	distal-less homeobox 1
8	86507909	86509008	1100	*	.	1000	20.2838	5143.73	5139.06	819	Promoter (<=1kb)	453	86472349	86508686	36338	2	ENSG00000176623	ENST00000406452	0	51115	RMDN1	regulator of microtubule dynamics 1
17	63741106	63743158	2053	*	.	1000	14.8693	5142.44	5137.77	791	Promoter (<=1kb)	462	63682336	63741845	59510	2	ENSG00000266173	ENST00000640870	0	92335	STRADA	STE20 related adaptor alpha
8	76999776	77001087	1312	*	.	1000	17.4625	5140.42	5135.75	530	Promoter (<=1kb)	453	76980258	77000078	19821	2	ENSG00000164751	ENST00000357039	0	5828	PEX2	peroxisomal biogenesis factor 2
14	39174631	39175926	1296	*	.	1000	13.6066	5138.34	5133.68	503	Promoter (<=1kb)	459	39175183	39179246	4064	1	ENSG00000100941	ENST00000553331	0	5411	PNN	pinin, desmosome associated protein
3	123584500	123585878	1379	*	.	1000	14.5485	5137.06	5132.39	626	Promoter (<=1kb)	448	123491554	123585053	93500	2	ENSG00000206527	ENST00000383657	0	201562	HACD2	3-hydroxyacyl-CoA dehydratase 2
5	71586710	71588023	1314	*	.	1000	22.9376	5136.6	5131.94	544	Promoter (<=1kb)	450	71586745	71658691	71947	1	ENSG00000131844	ENST00000682214	0	64087	MCCC2	methylcrotonyl-CoA carboxylase subunit 2
5	179858109	179859502	1394	*	.	1000	16.6841	5133.47	5128.81	795	Promoter (<=1kb)	450	179835133	179858860	23728	2	ENSG00000161010	ENST00000522663	0	51149	MRNIP	MRN complex interacting protein
8	91069474	91070811	1338	*	.	1000	22.7485	5132	5127.34	802	Promoter (<=1kb)	453	91070196	91087091	16896	1	ENSG00000155100	ENST00000615618	0	51633	OTUD6B	OTU deubiquitinase 6B
1	155609690	155610849	1160	*	.	1000	18.4179	5124.18	5119.52	421	Promoter (<=1kb)	446	155610205	155612316	2112	1	ENSG00000125459	ENST00000488901	0	55154	MSTO1	misato mitochondrial distribution and morphology regulator 1
7	112205324	112207388	2065	*	.	1000	12.2542	5123.45	5118.79	1132	Promoter (<=1kb)	452	111726110	112206399	480290	2	ENSG00000128512	ENST00000428084	0	9732	DOCK4	dedicator of cytokinesis 4
17	43360344	43361835	1492	*	.	1000	11.6795	5122.77	5118.11	785	Promoter (<=1kb)	462	43360041	43361361	1321	2	ENSG00000279602	ENST00000624705	0	NA	NA	NA
16	4733812	4735221	1410	*	.	1000	17.5158	5119.78	5115.12	603	Promoter (<=1kb)	461	4734344	4740345	6002	1	ENSG00000166246	ENST00000586724	0	146562	DNAAF8	dynein axonemal assembly factor 8
11	125111004	125112226	1223	*	.	1000	22.805	5119.71	5115.05	782	Promoter (<=1kb)	456	125094389	125111626	17238	2	ENSG00000150433	ENST00000682305	0	219854	TMEM218	transmembrane protein 218
2	25041234	25043706	2473	*	.	1000	13.5518	5118.17	5113.51	872	Promoter (<=1kb)	447	25042076	25159135	117060	1	ENSG00000084710	ENST00000403714	0	22979	EFR3B	EFR3 homolog B
12	56127828	56129647	1820	*	.	1000	13.5522	5117.53	5112.87	288	Promoter (<=1kb)	457	56128267	56144041	15775	1	ENSG00000139641	ENST00000267113	0	23344	ESYT1	extended synaptotagmin 1
17	72119920	72122245	2326	*	.	1000	14.0617	5115.36	5110.71	1025	Promoter (<=1kb)	462	72121020	72126416	5397	1	ENSG00000125398	ENST00000245479	0	6662	SOX9	SRY-box transcription factor 9
15	92903896	92904676	781	*	.	1000	10.3	5113.53	5108.88	381	Promoter (<=1kb)	460	92904473	92949231	44759	1	ENSG00000173575	ENST00000626782	0	1106	CHD2	chromodomain helicase DNA binding protein 2
14	24241819	24243413	1595	*	.	1000	14.6306	5112.95	5108.29	878	Promoter (<=1kb)	459	24239643	24242623	2981	2	ENSG00000092330	ENST00000267415	0	26277	TINF2	TERF1 interacting nuclear factor 2
2	112763722	112765122	1401	*	.	1000	17.9709	5112.62	5107.96	1023	Promoter (<=1kb)	447	112736349	112764609	28261	2	ENSG00000169607	ENST00000302450	0	150468	CKAP2L	cytoskeleton associated protein 2 like
8	123072226	123073571	1346	*	.	1000	20.3777	5111.7	5107.05	379	Promoter (<=1kb)	453	123072682	123109620	36939	1	ENSG00000156787	ENST00000519418	0	93594	TBC1D31	TBC1 domain family member 31
17	75904346	75905548	1203	*	.	1000	15.8208	5109.3	5104.65	697	Promoter (<=1kb)	462	75898644	75904884	6241	2	ENSG00000204316	ENST00000309352	0	64978	MRPL38	mitochondrial ribosomal protein L38
15	64835546	64836437	892	*	.	1000	24.6244	5109.28	5104.62	302	Distal Intergenic	460	64841883	64868000	26118	1	ENSG00000241839	ENST00000616065	-5446	80301	PLEKHO2	pleckstrin homology domain containing O2
2	210001994	210003304	1311	*	.	1000	24.4045	5106.15	5101.5	566	Promoter (<=1kb)	447	210002565	210022259	19695	1	ENSG00000197713	ENST00000354506	0	6120	RPE	ribulose-5-phosphate-3-epimerase
19	51107702	51109072	1371	*	.	1000	16.9096	5104.17	5099.52	741	Promoter (<=1kb)	464	51097606	51108409	10804	2	ENSG00000142544	ENST00000421832	0	90353	CTU1	cytosolic thiouridylase subunit 1
7	105531481	105532827	1347	*	.	1000	22.74	5102.91	5098.26	651	Promoter (<=1kb)	452	105532169	105547321	15153	1	ENSG00000135249	ENST00000467392	0	60561	RINT1	RAD50 interactor 1
11	64184896	64186379	1484	*	.	1000	11.9922	5099.6	5094.95	1148	Promoter (<=1kb)	456	64185272	64204543	19272	1	ENSG00000168439	ENST00000358794	0	10963	STIP1	stress induced phosphoprotein 1
4	83034317	83035858	1542	*	.	1000	19.8225	5098.77	5094.13	722	Promoter (<=1kb)	449	83034447	83075789	41343	1	ENSG00000138663	ENST00000509093	0	51138	COPS4	COP9 signalosome subunit 4
16	30377518	30379229	1712	*	.	1000	15.0122	5094.42	5089.77	852	Promoter (<=1kb)	461	30378106	30395455	17350	1	ENSG00000180035	ENST00000495929	0	197407	ZNF48	zinc finger protein 48
17	47099830	47100783	954	*	.	1000	22.653	5092.38	5087.74	534	Promoter (<=1kb)	462	46983287	47100289	117003	2	ENSG00000262879	ENST00000668245	0	101927060	LOC101927060	uncharacterized LOC101927060
2	9554890	9556595	1706	*	.	1000	11.6352	5085.83	5081.19	1029	Promoter (<=1kb)	447	9488486	9555830	67345	2	ENSG00000151694	ENST00000310823	0	6868	ADAM17	ADAM metallopeptidase domain 17
15	33194270	33195377	1108	*	.	1000	22.0226	5085.45	5080.81	568	Promoter (<=1kb)	460	32765544	33194714	429171	2	ENSG00000248905	ENST00000616417	0	342184	FMN1	formin 1
1	145094557	145096498	1942	*	.	1000	9.0736	5085.12	5080.48	1122	Promoter (<=1kb)	446	144887265	145095528	208264	2	ENSG00000196369	ENST00000612199	0	647135	SRGAP2B	SLIT-ROBO Rho GTPase activating protein 2B
1	225923482	225924796	1315	*	.	1000	19.4734	5081.95	5077.31	866	Promoter (<=1kb)	446	225919877	225924340	4464	2	ENSG00000143811	ENST00000612039	0	29920	PYCR2	pyrroline-5-carboxylate reductase 2
14	91060212	91061254	1043	*	.	1000	14.8629	5079.91	5075.27	502	Promoter (<=1kb)	459	90847861	91060641	212781	2	ENSG00000100784	ENST00000614987	0	9252	RPS6KA5	ribosomal protein S6 kinase A5
3	8501302	8502206	905	*	.	1000	13.0071	5078.89	5074.25	393	Promoter (<=1kb)	448	8501807	8550449	48643	1	ENSG00000071282	ENST00000426878	0	29995	LMCD1	LIM and cysteine rich domains 1
8	9555423	9556876	1454	*	.	1000	22.1171	5077.53	5072.89	444	Promoter (<=1kb)	453	9555912	9782346	226435	1	ENSG00000173273	ENST00000310430	0	8658	TNKS	tankyrase
3	101676088	101677674	1587	*	.	1000	12.0459	5075.4	5070.76	253	Promoter (<=1kb)	448	101648889	101677132	28244	2	ENSG00000066422	ENST00000312938	0	27107	ZBTB11	zinc finger and BTB domain containing 11
1	55428626	55429847	1222	*	.	1000	18.7909	5074.43	5069.8	750	Intron (ENST00000643167/ENSG00000234810, intron 1 of 3)	446	55398514	55398620	107	1	ENSG00000252162	ENST00000516353	30112	106480613	RNU6-830P	RNA, U6 small nuclear 830, pseudogene
1	153922317	153923915	1599	*	.	1000	16.6964	5073.48	5068.84	764	Promoter (<=1kb)	446	153804725	153922972	118248	2	ENSG00000143614	ENST00000368655	0	57459	GATAD2B	GATA zinc finger domain containing 2B
10	102501932	102503156	1225	*	.	1000	10.1666	5072.67	5068.03	997	Promoter (<=1kb)	455	102461881	102502709	40829	2	ENSG00000138107	ENST00000636707	0	10121	ACTR1A	actin related protein 1A
9	15552128	15553762	1635	*	.	1000	18.477	5070.45	5065.82	848	Promoter (<=1kb)	454	15553043	15974037	420995	1	ENSG00000164989	ENST00000380701	0	203238	CCDC171	coiled-coil domain containing 171
17	81860317	81861686	1370	*	.	1000	11.445	5069.89	5065.25	567	Promoter (<=1kb)	462	81843159	81860508	17350	2	ENSG00000185624	ENST00000680083	0	5034	P4HB	prolyl 4-hydroxylase subunit beta
16	71425785	71427478	1694	*	.	1000	14.9284	5068.64	5064.01	911	Promoter (<=1kb)	461	71366933	71426464	59532	2	ENSG00000261348	ENST00000567469	0	NA	NA	NA
17	82036866	82037980	1115	*	.	1000	14.3773	5066.96	5062.32	893	Promoter (<=1kb)	462	82035136	82036995	1860	2	ENSG00000169738	ENST00000577532	0	51181	DCXR	dicarbonyl and L-xylulose reductase
7	36152488	36153977	1490	*	.	1000	14.9405	5065.42	5060.79	560	Promoter (<=1kb)	452	36153254	36301538	148285	1	ENSG00000122547	ENST00000242108	0	80820	EEPD1	endonuclease/exonuclease/phosphatase family domain containing 1
10	99430262	99431610	1349	*	.	1000	19.3342	5063.94	5059.31	620	Promoter (<=1kb)	455	99396870	99430624	33755	2	ENSG00000120053	ENST00000370508	0	2805	GOT1	glutamic-oxaloacetic transaminase 1
19	40348025	40348872	848	*	.	1000	18.9293	5062.77	5058.14	427	Promoter (<=1kb)	464	40348456	40366880	18425	1	ENSG00000105223	ENST00000599685	0	23646	PLD3	phospholipase D family member 3
14	72925902	72927476	1575	*	.	1000	15.6454	5061.92	5057.29	476	Promoter (<=1kb)	459	72926377	72959592	33216	1	ENSG00000119599	ENST00000353777	0	26094	DCAF4	DDB1 and CUL4 associated factor 4
1	186374402	186376182	1781	*	.	1000	14.2636	5061.88	5057.25	969	Promoter (<=1kb)	446	186311652	186375253	63602	2	ENSG00000047410	ENST00000367478	0	7175	TPR	translocated promoter region, nuclear basket protein
11	4094107	4095366	1260	*	.	1000	20.3073	5060.58	5055.96	580	Promoter (<=1kb)	456	4094707	4107480	12774	1	ENSG00000167325	ENST00000532710	0	6240	RRM1	ribonucleotide reductase catalytic subunit M1
5	75510519	75512233	1715	*	.	1000	16.8901	5059.45	5054.82	1298	Promoter (<=1kb)	450	75356352	75511286	154935	2	ENSG00000113163	ENST00000644912	0	10087	CERT1	ceramide transporter 1
3	150545516	150547141	1626	*	.	1000	16.931	5056.53	5051.9	1226	Promoter (<=1kb)	448	150541998	150546496	4499	2	ENSG00000120742	ENST00000239944	0	27230	SERP1	stress associated endoplasmic reticulum protein 1
12	6470148	6471377	1230	*	.	1000	14.8247	5055.38	5050.75	615	Promoter (<=1kb)	457	6462237	6470653	8417	2	ENSG00000139190	ENST00000400911	0	6843	VAMP1	vesicle associated membrane protein 1
19	58475428	58476918	1491	*	.	1000	12.0087	5054.65	5050.02	692	Promoter (<=1kb)	464	58476146	58478124	1979	1	ENSG00000083838	ENST00000594468	0	55663	ZNF446	zinc finger protein 446
3	149812113	149813950	1838	*	.	1000	14.4538	5052.67	5048.04	1060	Promoter (<=1kb)	448	149812770	149962122	149353	1	ENSG00000082996	ENST00000344229	0	11342	RNF13	ring finger protein 13
14	75002192	75003620	1429	*	.	1000	20.1997	5049.05	5044.43	653	Promoter (<=1kb)	459	75002921	75012366	9446	1	ENSG00000119718	ENST00000266126	0	8892	EIF2B2	eukaryotic translation initiation factor 2B subunit beta
3	121834384	121835824	1441	*	.	1000	22.0558	5046.15	5041.53	748	Promoter (<=1kb)	448	121835183	121886468	51286	1	ENSG00000145088	ENST00000490434	0	55840	EAF2	ELL associated factor 2
2	26345360	26346903	1544	*	.	1000	15.8097	5041.71	5037.09	569	Promoter (<=1kb)	447	26346143	26395885	49743	1	ENSG00000138018	ENST00000260585	0	85465	SELENOI	selenoprotein I
7	102490458	102491372	915	*	.	1000	12.254	5037.91	5033.29	392	Promoter (1-2kb)	452	102482445	102493311	10867	2	ENSG00000170667	ENST00000477184	1939	100271927	RASA4B	RAS p21 protein activator 4B
14	22929044	22930098	1055	*	.	1000	15.0112	5036.39	5031.78	486	Promoter (<=1kb)	459	22920525	22929401	8877	2	ENSG00000100462	ENST00000397441	0	10419	PRMT5	protein arginine methyltransferase 5
14	63542264	63544104	1841	*	.	1000	16.1898	5035.99	5031.37	1190	Promoter (<=1kb)	459	63371364	63543377	172014	2	ENSG00000154001	ENST00000337537	0	5529	PPP2R5E	protein phosphatase 2 regulatory subunit B'epsilon
7	90402966	90404192	1227	*	.	1000	24.2184	5035.14	5030.52	489	Promoter (<=1kb)	452	90403386	90415954	12569	1	ENSG00000157224	ENST00000287916	0	9069	CLDN12	claudin 12
17	76540334	76541362	1029	*	.	1000	17.9691	5034.67	5030.05	668	Promoter (<=1kb)	462	76540471	76545345	4875	1	ENSG00000214140	ENST00000397630	0	768206	PRCD	photoreceptor disc component
15	75639508	75641196	1689	*	.	1000	13.721	5034.19	5029.57	798	Promoter (<=1kb)	460	75639093	75640224	1132	2	ENSG00000177971	ENST00000403490	0	55272	IMP3	IMP U3 small nucleolar ribonucleoprotein 3
21	10341798	10343267	1470	*	.	1000	16.1084	5031.88	5027.26	964	Promoter (<=1kb)	466	10328411	10342669	14259	2	ENSG00000277693	ENST00000622592	0	NA	NA	NA
14	101947606	101949092	1487	*	.	1000	18.1871	5026.84	5022.23	662	Promoter (<=1kb)	459	101948347	101949425	1079	1	ENSG00000271780	ENST00000607414	0	NA	NA	NA
2	127885286	127886924	1639	*	.	1000	14.7256	5026.76	5022.15	911	Promoter (<=1kb)	447	127861630	127885956	24327	2	ENSG00000144233	ENST00000272647	0	83607	AMMECR1L	AMMECR1 like
3	9730740	9732378	1639	*	.	1000	15.0692	5025.76	5021.15	598	Promoter (<=1kb)	448	9731729	9747873	16145	1	ENSG00000156983	ENST00000433861	0	7862	BRPF1	bromodomain and PHD finger containing 1
15	79896219	79897613	1395	*	.	1000	16.6285	5025.71	5021.1	815	Promoter (<=1kb)	460	79843547	79897014	53468	2	ENSG00000136371	ENST00000258874	0	10588	MTHFS	methenyltetrahydrofolate synthetase
19	39341176	39342502	1327	*	.	1000	15.7647	5025.62	5021.01	836	Promoter (<=1kb)	464	39328362	39342372	14011	2	ENSG00000130755	ENST00000600322	0	9535	GMFG	glia maturation factor gamma
12	48851820	48852883	1064	*	.	1000	13.8695	5025.49	5020.88	446	Promoter (<=1kb)	457	48829756	48852163	22408	2	ENSG00000174243	ENST00000308025	0	9416	DDX23	DEAD-box helicase 23
7	138001387	138002536	1150	*	.	1000	15.4619	5022.47	5017.86	962	Promoter (<=1kb)	452	138002324	138116866	114543	1	ENSG00000122787	ENST00000468877	0	6718	AKR1D1	aldo-keto reductase family 1 member D1
12	31073146	31074902	1757	*	.	1000	14.3173	5021.74	5017.13	1033	Promoter (<=1kb)	457	31073860	31094633	20774	1	ENSG00000013573	ENST00000542129	0	1663	DDX11	DEAD/H-box helicase 11
10	103917352	103918878	1527	*	.	1000	16.2602	5021.4	5016.79	869	Promoter (<=1kb)	455	103877569	103918184	40616	2	ENSG00000107960	ENST00000224950	0	79991	STN1	STN1 subunit of CST complex
11	106021745	106022888	1144	*	.	1000	20.8667	5020.92	5016.31	725	Promoter (<=1kb)	456	106007899	106022240	14342	2	ENSG00000170903	ENST00000301919	0	84437	MSANTD4	Myb/SANT DNA binding domain containing 4 with coiled-coils
16	28950346	28951636	1291	*	.	1000	15.8907	5020.81	5016.2	438	Promoter (<=1kb)	461	28950807	28965698	14892	1	ENSG00000176953	ENST00000564978	0	84901	NFATC2IP	nuclear factor of activated T cells 2 interacting protein
11	34438477	34439607	1131	*	.	1000	21.6377	5018.63	5014.02	370	Promoter (<=1kb)	456	34438934	34472060	33127	1	ENSG00000121691	ENST00000241052	0	847	CAT	catalase
12	57693348	57694643	1296	*	.	1000	22.2296	5017.26	5012.65	715	Promoter (<=1kb)	457	57693955	57720998	27044	1	ENSG00000135506	ENST00000552285	0	10956	OS9	OS9 endoplasmic reticulum lectin
8	141153292	141154575	1284	*	.	1000	13.7972	5015.59	5010.98	1020	Promoter (1-2kb)	453	141155894	141166233	10340	1	ENSG00000105339	ENST00000521477	-1319	22898	DENND3	DENN domain containing 3
5	81971531	81972650	1120	*	.	1000	17.2487	5014.9	5010.29	453	Promoter (<=1kb)	450	81972023	82256133	284111	1	ENSG00000152348	ENST00000282185	0	83734	ATG10	autophagy related 10
15	64380669	64382099	1431	*	.	1000	20.4177	5013.18	5008.57	901	Promoter (<=1kb)	460	64364304	64381441	17138	2	ENSG00000166803	ENST00000300035	0	9768	PCLAF	PCNA clamp associated factor
19	38402626	38403801	1176	*	.	1000	16.7016	5013.17	5008.56	417	Promoter (<=1kb)	464	38403093	38409084	5992	1	ENSG00000130244	ENST00000252530	0	147965	FAM98C	family with sequence similarity 98 member C
5	141968629	141969835	1207	*	.	1000	18.1357	5013.17	5008.56	492	Promoter (<=1kb)	450	141968886	141990290	21405	1	ENSG00000013561	ENST00000347642	0	9604	RNF14	ring finger protein 14
4	140523658	140524759	1102	*	.	1000	25.4642	5009.73	5005.12	419	Promoter (<=1kb)	449	140524168	140527952	3785	1	ENSG00000179387	ENST00000511887	0	255520	ELMOD2	ELMO domain containing 2
12	108690923	108692727	1805	*	.	1000	15.3076	5008.79	5004.18	833	Intron (ENST00000261401/ENSG00000110880, intron 2 of 10)	457	108647380	108696402	49023	2	ENSG00000110880	ENST00000421578	3675	23603	CORO1C	coronin 1C
12	71662857	71664638	1782	*	.	1000	14.0626	5006.07	5001.47	1117	Promoter (<=1kb)	457	71609599	71663848	54250	2	ENSG00000133858	ENST00000378743	0	196441	ZFC3H1	zinc finger C3H1-type containing
10	101353509	101354834	1326	*	.	1000	18.2114	5005.44	5000.83	552	Promoter (<=1kb)	455	101354033	101557319	203287	1	ENSG00000166167	ENST00000393441	0	8945	BTRC	beta-transducin repeat containing E3 ubiquitin protein ligase
10	44959128	44960315	1188	*	.	1000	23.1203	5003.74	4999.14	503	Promoter (<=1kb)	455	44959407	44994707	35301	1	ENSG00000107551	ENST00000489171	0	83937	RASSF4	Ras association domain family member 4
5	140400629	140402685	2057	*	.	1000	10.2771	5003.44	4998.83	546	Promoter (<=1kb)	450	140401814	140472476	70663	1	ENSG00000131503	ENST00000616482	0	54882	ANKHD1	ankyrin repeat and KH domain containing 1
11	19116803	19117899	1097	*	.	1000	20.9711	5001.5	4996.9	283	Promoter (<=1kb)	456	19117099	19149255	32157	1	ENSG00000177054	ENST00000532026	0	54503	ZDHHC13	zinc finger DHHC-type palmitoyltransferase 13
1	154182140	154183577	1438	*	.	1000	15.5905	5000.83	4996.23	1182	Promoter (<=1kb)	446	154155304	154183249	27946	2	ENSG00000143549	ENST00000611659	0	7170	TPM3	tropomyosin 3
15	59104689	59105810	1122	*	.	1000	19.9911	4999.91	4995.31	396	Promoter (<=1kb)	460	59105126	59114614	9489	1	ENSG00000157456	ENST00000561077	0	9133	CCNB2	cyclin B2
5	131634674	131636163	1490	*	.	1000	15.6911	4998.53	4993.93	784	Promoter (<=1kb)	450	131423921	131635229	211309	2	ENSG00000158987	ENST00000509018	0	51735	RAPGEF6	Rap guanine nucleotide exchange factor 6
15	75451596	75452373	778	*	.	1000	6.14825	4996.47	4991.87	412	Promoter (<=1kb)	460	75369379	75451690	82312	2	ENSG00000169375	ENST00000394947	0	25942	SIN3A	SIN3 transcription regulator family member A
14	104752346	104753793	1448	*	.	1000	13.6596	4992.5	4987.9	647	Promoter (<=1kb)	459	104753147	104757479	4333	1	ENSG00000184990	ENST00000535554	0	10572	SIVA1	SIVA1 apoptosis inducing factor
6	155313963	155315271	1309	*	.	1000	18.3518	4992.46	4987.86	754	Promoter (<=1kb)	451	155256134	155314484	58351	2	ENSG00000029639	ENST00000367166	0	51106	TFB1M	transcription factor B1, mitochondrial
17	3667357	3669297	1941	*	.	1000	12.253	4987.35	4982.75	1225	Promoter (<=1kb)	462	3668812	3669665	854	1	ENSG00000127774	ENST00000248378	0	83460	EMC6	ER membrane protein complex subunit 6
2	9630062	9631564	1503	*	.	1000	12.8095	4986.41	4981.81	1105	Promoter (<=1kb)	447	9583967	9630997	47031	2	ENSG00000134308	ENST00000238081	0	10971	YWHAQ	tyrosine 3-monooxygenase/tryptophan 5-monooxygenase activation protein theta
14	73949673	73950802	1130	*	.	1000	15.9682	4985.57	4980.98	605	Promoter (<=1kb)	459	73949926	73963108	13183	1	ENSG00000119723	ENST00000394026	0	51004	COQ6	coenzyme Q6, monooxygenase
1	164558536	164560058	1523	*	.	1000	17.7915	4985.14	4980.55	371	Promoter (<=1kb)	446	164559184	164851831	292648	1	ENSG00000185630	ENST00000420696	0	5087	PBX1	PBX homeobox 1
7	102363365	102364388	1024	*	.	1000	23.8288	4983.6	4979.01	386	Promoter (<=1kb)	452	102363872	102404625	40754	1	ENSG00000128563	ENST00000477886	0	79706	PRKRIP1	PRKR interacting protein 1
16	67935149	67937160	2012	*	.	1000	13.6117	4982.85	4978.26	653	Promoter (<=1kb)	461	67934506	67935795	1290	2	ENSG00000205220	ENST00000570985	0	5699	PSMB10	proteasome 20S subunit beta 10
10	97640202	97641558	1357	*	.	1000	19.8669	4982.76	4978.17	435	Promoter (<=1kb)	455	97640686	97676434	35749	1	ENSG00000155252	ENST00000370631	0	55361	PI4K2A	phosphatidylinositol 4-kinase type 2 alpha
7	149837962	149839331	1370	*	.	1000	17.2143	4981.84	4977.24	380	Promoter (<=1kb)	452	149838375	149845091	6717	1	ENSG00000106479	ENST00000489820	0	643641	ZNF862	zinc finger protein 862
2	132346836	132347836	1001	*	.	1000	22.9981	4979.79	4975.2	587	Promoter (<=1kb)	447	132345616	132347297	1682	2	ENSG00000272769	ENST00000608279	0	NA	NA	NA
12	62259358	62261205	1848	*	.	1000	16.4647	4979.68	4975.08	846	Promoter (<=1kb)	457	62260338	62416389	156052	1	ENSG00000135655	ENST00000353364	0	9958	USP15	ubiquitin specific peptidase 15
17	59707107	59708507	1401	*	.	1000	15.6608	4977.77	4973.18	487	Promoter (<=1kb)	462	59707192	59707676	485	1	ENSG00000062716	ENST00000588915	0	81671	VMP1	vacuole membrane protein 1
14	19061659	19063269	1611	*	.	1000	23.1808	4974.34	4969.75	678	Promoter (<=1kb)	459	19062316	19068183	5868	1	ENSG00000225210	ENST00000549484	0	503638	DUXAP9	double homeobox A pseudogene 9
5	151252406	151253608	1203	*	.	1000	17.8545	4973.56	4968.97	606	Promoter (<=1kb)	450	151253185	151270440	17256	1	ENSG00000196743	ENST00000357164	0	2760	GM2A	GM2 ganglioside activator
11	73597719	73598904	1186	*	.	1000	17.2365	4972.61	4968.02	869	Promoter (<=1kb)	456	73400487	73598112	197626	2	ENSG00000054965	ENST00000356467	0	23201	FAM168A	family with sequence similarity 168 member A
19	58326497	58327792	1296	*	.	1000	15.2113	4972.12	4967.53	473	Promoter (<=1kb)	464	58326994	58342332	15339	1	ENSG00000182318	ENST00000329665	0	342945	ZSCAN22	zinc finger and SCAN domain containing 22
3	9396147	9397840	1694	*	.	1000	9.20379	4970.33	4965.74	904	Promoter (<=1kb)	448	9397615	9440698	43084	1	ENSG00000168137	ENST00000431285	0	55209	SETD5	SET domain containing 5
5	103258322	103260006	1685	*	.	1000	12.4632	4966.16	4961.57	280	Promoter (<=1kb)	450	103258763	103278660	19898	1	ENSG00000181751	ENST00000319933	0	90355	MACIR	macrophage immunometabolism regulator
12	96219038	96220389	1352	*	.	1000	15.6047	4964.63	4960.04	914	Intron (ENST00000228741/ENSG00000111145, intron 1 of 4)	457	96222797	96223973	1177	2	ENSG00000258177	ENST00000551844	3584	NA	NA	NA
2	74198053	74199689	1637	*	.	1000	13.1066	4964.55	4959.96	481	Promoter (<=1kb)	447	74198610	74215298	16689	1	ENSG00000065911	ENST00000409804	0	10797	MTHFD2	methylenetetrahydrofolate dehydrogenase (NADP+ dependent) 2, methenyltetrahydrofolate cyclohydrolase
5	150758270	150759476	1207	*	.	1000	17.5149	4961.2	4956.61	387	Promoter (<=1kb)	450	150708440	150759017	50578	2	ENSG00000132912	ENST00000447998	0	51164	DCTN4	dynactin subunit 4
4	183658569	183659811	1243	*	.	1000	23.9647	4960.26	4955.67	665	Promoter (<=1kb)	449	183659267	183713594	54328	1	ENSG00000168538	ENST00000357207	0	60684	TRAPPC11	trafficking protein particle complex subunit 11
17	20155574	20156841	1268	*	.	1000	17.4488	4959.47	4954.89	360	Promoter (<=1kb)	462	20155742	20314735	158994	1	ENSG00000128487	ENST00000579688	0	92521	SPECC1	sperm antigen with calponin homology and coiled-coil domains 1
17	20531511	20533428	1918	*	.	1000	18.162	4958.97	4954.38	695	Promoter (<=1kb)	462	20532248	20532881	634	2	ENSG00000265916	ENST00000584274	0	NA	NA	NA
7	92527550	92529115	1566	*	.	1000	16.0021	4958.29	4953.71	1165	Promoter (<=1kb)	452	92487020	92528441	41422	2	ENSG00000127980	ENST00000438045	0	5189	PEX1	peroxisomal biogenesis factor 1
12	51025667	51026821	1155	*	.	1000	16.4492	4956.3	4951.72	780	Promoter (<=1kb)	457	50979784	51026384	46601	2	ENSG00000110911	ENST00000644495	0	4891	SLC11A2	solute carrier family 11 member 2
3	120741983	120743238	1256	*	.	1000	19.1704	4955.65	4951.07	587	Promoter (<=1kb)	448	120684938	120742516	57579	2	ENSG00000144840	ENST00000273375	0	285282	RABL3	RAB, member of RAS oncogene family like 3
1	235367058	235368328	1271	*	.	1000	22.5727	4954.86	4950.28	305	Promoter (<=1kb)	446	235367360	235448966	81607	1	ENSG00000284770	ENST00000651186	0	6905	TBCE	tubulin folding cofactor E
10	12068457	12069731	1275	*	.	1000	17.0098	4953.17	4948.59	331	Promoter (<=1kb)	455	12068954	12123221	54268	1	ENSG00000181192	ENST00000263035	0	55526	DHTKD1	dehydrogenase E1 and transketolase domain containing 1
2	24792619	24794282	1664	*	.	1000	13.6556	4952.86	4948.28	761	Promoter (<=1kb)	447	24793136	24799794	6659	1	ENSG00000138092	ENST00000473476	0	79172	CENPO	centromere protein O
16	30747823	30748998	1176	*	.	1000	17.7748	4951.79	4947.21	477	Promoter (<=1kb)	461	30748293	30756483	8191	1	ENSG00000156873	ENST00000565924	0	5261	PHKG2	phosphorylase kinase catalytic subunit gamma 2
13	72726987	72728338	1352	*	.	1000	18.9441	4951.18	4946.6	683	Promoter (<=1kb)	458	72727749	72756198	28450	1	ENSG00000136122	ENST00000652266	0	79866	BORA	BORA aurora kinase A activator
1	246931014	246932605	1592	*	.	1000	16.6745	4950.49	4945.91	953	Promoter (<=1kb)	446	246839098	246931363	92266	2	ENSG00000153207	ENST00000366508	0	25909	AHCTF1	AT-hook containing transcription factor 1
17	41917984	41920047	2064	*	.	1000	11.7106	4949.58	4945	1167	Promoter (<=1kb)	462	41866917	41918962	52046	2	ENSG00000131473	ENST00000590151	0	47	ACLY	ATP citrate lyase
10	16816906	16818037	1132	*	.	1000	16.9788	4948.68	4944.1	595	Promoter (<=1kb)	455	16590611	16817383	226773	2	ENSG00000148484	ENST00000377921	0	6251	RSU1	Ras suppressor protein 1
19	58407779	58409852	2074	*	.	1000	13.6793	4946.56	4941.98	776	Promoter (<=1kb)	464	58408649	58418327	9679	1	ENSG00000171574	ENST00000306910	0	201514	ZNF584	zinc finger protein 584
17	46361004	46362342	1339	*	.	1000	21.1995	4945.93	4941.35	855	Promoter (<=1kb)	462	46274784	46361764	86981	2	ENSG00000228696	ENST00000570618	0	51326	ARL17A	ADP ribosylation factor like GTPase 17A
19	45583844	45585325	1482	*	.	1000	13.0493	4943.09	4938.51	654	Promoter (<=1kb)	464	45527427	45584842	57416	2	ENSG00000125741	ENST00000323060	0	80207	OPA3	outer mitochondrial membrane lipid metabolism regulator OPA3
11	59549892	59551553	1662	*	.	1000	11.4162	4941.2	4936.63	555	Intron (ENST00000659845/ENSG00000287264, intron 1 of 1)	456	59545602	59558882	13281	1	ENSG00000287264	ENST00000659845	4290	NA	NA	NA
3	38024096	38025418	1323	*	.	1000	11.6793	4940.4	4935.82	1004	Promoter (<=1kb)	448	38007498	38024787	17290	2	ENSG00000187091	ENST00000463876	0	5333	PLCD1	phospholipase C delta 1
6	89828968	89830325	1358	*	.	1000	21.1349	4939.07	4934.5	880	Promoter (<=1kb)	451	89829894	89862793	32900	1	ENSG00000118412	ENST00000552401	0	9994	CASP8AP2	caspase 8 associated protein 2
7	151226569	151227734	1166	*	.	1000	20.704	4937.96	4933.39	733	Promoter (<=1kb)	452	151211484	151227205	15722	2	ENSG00000033050	ENST00000287844	0	10061	ABCF2	ATP binding cassette subfamily F member 2
9	125199906	125201207	1302	*	.	1000	17.9825	4936.82	4932.25	567	Promoter (<=1kb)	454	125200542	125234158	33617	1	ENSG00000136933	ENST00000259460	0	10244	RABEPK	Rab9 effector protein with kelch motifs
19	55407153	55408529	1377	*	.	1000	14.4322	4936.08	4931.51	1107	Promoter (<=1kb)	464	55399745	55407788	8044	2	ENSG00000108106	ENST00000264552	0	27338	UBE2S	ubiquitin conjugating enzyme E2 S
14	74492880	74494279	1400	*	.	1000	15.2723	4931.17	4926.6	708	Promoter (<=1kb)	459	74476192	74493307	17116	2	ENSG00000119655	ENST00000434013	0	10577	NPC2	NPC intracellular cholesterol transporter 2
12	132593769	132594404	636	*	.	1000	18.9502	4927.69	4923.12	350	Promoter (<=1kb)	457	132593031	132593698	668	2	ENSG00000277186	ENST00000613771	-71	NA	NA	NA
3	100260427	100261508	1082	*	.	1000	21.8019	4927.62	4923.05	411	Promoter (<=1kb)	448	100260992	100325238	64247	1	ENSG00000036054	ENST00000394144	0	55773	TBC1D23	TBC1 domain family member 23
7	35003209	35004512	1304	*	.	1000	14.7153	4927.22	4922.65	728	Promoter (2-3kb)	452	34973513	35000702	27190	2	ENSG00000173852	ENST00000463538	-2507	23333	DPY19L1	dpy-19 like C-mannosyltransferase 1
1	155745197	155746422	1226	*	.	1000	16.5005	4926.05	4921.48	536	Promoter (<=1kb)	446	155745829	155750137	4309	1	ENSG00000203761	ENST00000314835	0	NA	NA	NA
14	90382633	90383969	1337	*	.	1000	17.1521	4925.04	4920.47	634	Promoter (<=1kb)	459	90383365	90387973	4609	1	ENSG00000275198	ENST00000615251	0	NA	NA	NA
17	42154565	42155781	1217	*	.	1000	19.2393	4922.18	4917.62	547	Promoter (<=1kb)	462	42124978	42155044	30067	2	ENSG00000108774	ENST00000393860	0	5878	RAB5C	RAB5C, member RAS oncogene family
20	5126263	5128022	1760	*	.	1000	13.6774	4919.78	4915.22	644	Promoter (<=1kb)	465	5126879	5183178	56300	1	ENSG00000101290	ENST00000467923	0	8760	CDS2	CDP-diacylglycerol synthase 2
8	89983698	89984872	1175	*	.	1000	16.7975	4919.77	4915.2	513	Promoter (<=1kb)	453	89933331	89984667	51337	2	ENSG00000104320	ENST00000265433	0	4683	NBN	nibrin
11	82900145	82901984	1840	*	.	1000	13.1838	4919.08	4914.52	356	Promoter (<=1kb)	456	82822936	82900430	77495	2	ENSG00000137509	ENST00000313010	0	5547	PRCP	prolylcarboxypeptidase
11	47766635	47768077	1443	*	.	1000	13.5423	4918.5	4913.94	934	Promoter (<=1kb)	456	47716494	47767341	50848	2	ENSG00000109920	ENST00000263773	0	23360	FNBP4	formin binding protein 4
7	88219288	88220772	1485	*	.	1000	18.9098	4916.63	4912.06	760	Promoter (<=1kb)	452	88205115	88220038	14924	2	ENSG00000075142	ENST00000265729	0	6717	SRI	sorcin
5	5421763	5423095	1333	*	.	1000	16.9034	4914.75	4910.19	520	Promoter (<=1kb)	450	5422677	5490220	67544	1	ENSG00000164151	ENST00000296564	0	23379	ICE1	interactor of little elongation complex ELL subunit 1
12	88035008	88036231	1224	*	.	1000	23.1774	4914.2	4909.64	499	Promoter (<=1kb)	457	88035505	88050158	14654	1	ENSG00000133641	ENST00000550333	0	91298	C12orf29	chromosome 12 open reading frame 29
8	102238480	102239875	1396	*	.	1000	11.2121	4913.99	4909.43	949	Promoter (<=1kb)	453	102204502	102238961	34460	2	ENSG00000048392	ENST00000251810	0	50484	RRM2B	ribonucleotide reductase regulatory TP53 inducible subunit M2B
10	119595841	119597490	1650	*	.	1000	13.1729	4909.62	4905.06	1386	Promoter (<=1kb)	455	119571802	119596495	24694	2	ENSG00000151923	ENST00000369093	0	7073	TIAL1	TIA1 cytotoxic granule associated RNA binding protein like 1
9	38392267	38393715	1449	*	.	1000	21.2192	4907.85	4903.29	396	Promoter (<=1kb)	454	38392702	38398661	5960	1	ENSG00000137124	ENST00000377698	0	219	ALDH1B1	aldehyde dehydrogenase 1 family member B1
8	37762054	37763480	1427	*	.	1000	22.9853	4906.67	4902.11	505	Promoter (<=1kb)	453	37762595	37766741	4147	1	ENSG00000147471	ENST00000520073	0	11212	PLPBP	pyridoxal phosphate binding protein
7	30284010	30285356	1347	*	.	1000	14.2201	4905.22	4900.66	430	Promoter (<=1kb)	452	30284597	30367689	83093	1	ENSG00000180233	ENST00000323037	0	223082	ZNRF2	zinc and ring finger 2
9	36190491	36191580	1090	*	.	1000	18.5075	4904.02	4899.46	348	Promoter (<=1kb)	454	36190856	36212061	21206	1	ENSG00000122705	ENST00000433436	0	1211	CLTA	clathrin light chain A
17	17971675	17973197	1523	*	.	1000	14.3893	4901.08	4896.52	895	Promoter (<=1kb)	462	17972813	17983858	11046	1	ENSG00000171962	ENST00000582416	0	83450	DRC3	dynein regulatory complex subunit 3
4	781363	782634	1272	*	.	1000	16.6634	4900.85	4896.29	569	Promoter (<=1kb)	449	760202	781849	21648	2	ENSG00000249592	ENST00000660016	0	100129917	LOC100129917	uncharacterized LOC100129917
6	52284172	52285158	987	*	.	1000	20.4221	4897.94	4893.39	812	Promoter (<=1kb)	451	52264014	52284881	20868	2	ENSG00000112118	ENST00000229854	0	4172	MCM3	minichromosome maintenance complex component 3
16	74984380	74985782	1403	*	.	1000	18.9844	4896.37	4891.81	773	Promoter (<=1kb)	461	74871362	74985123	113762	2	ENSG00000103091	ENST00000262144	0	79726	WDR59	WD repeat domain 59
1	152047580	152048819	1240	*	.	1000	13.4803	4895.88	4891.33	545	Promoter (<=1kb)	446	152032506	152047907	15402	2	ENSG00000163191	ENST00000478109	0	6282	S100A11	S100 calcium binding protein A11
15	92831386	92832257	872	*	.	1000	21.4276	4895.71	4891.15	570	Intron (ENST00000653163/ENSG00000272888, intron 1 of 4)	460	92819650	92820384	735	2	ENSG00000289200	ENST00000691828	-11002	NA	NA	NA
19	58401122	58402021	900	*	.	1000	13.0337	4889.07	4884.52	191	Promoter (<=1kb)	464	58401504	58417119	15616	1	ENSG00000171574	ENST00000596921	0	201514	ZNF584	zinc finger protein 584
12	121399545	121401058	1514	*	.	1000	15.056	4885.98	4881.43	423	Promoter (<=1kb)	457	121345999	121399896	53898	2	ENSG00000089053	ENST00000536837	0	51433	ANAPC5	anaphase promoting complex subunit 5
2	119366150	119367896	1747	*	.	1000	17.7296	4883.55	4879	788	Promoter (<=1kb)	447	119366924	119372550	5627	1	ENSG00000155368	ENST00000535617	0	1622	DBI	diazepam binding inhibitor, acyl-CoA binding protein
19	42386741	42387799	1059	*	.	1000	15.7485	4882.25	4877.7	462	Promoter (2-3kb)	464	42387101	42390268	3168	2	ENSG00000105427	ENST00000597255	2469	84518	CNFN	cornifelin
12	120200668	120202162	1495	*	.	1000	14.3193	4881.5	4876.95	581	Promoter (<=1kb)	457	120196699	120201099	4401	2	ENSG00000089157	ENST00000551150	0	6175	RPLP0	ribosomal protein lateral stalk subunit P0
5	140664130	140665510	1381	*	.	1000	18.5723	4881.36	4876.81	670	Promoter (<=1kb)	450	140664868	140672344	7477	1	ENSG00000120314	ENST00000506393	0	54853	WDR55	WD repeat domain 55
19	34676812	34678079	1268	*	.	1000	16.6857	4880.53	4875.98	838	Promoter (<=1kb)	464	34677639	34683049	5411	1	ENSG00000089335	ENST00000512455	0	55900	ZNF302	zinc finger protein 302
2	241148949	241150792	1844	*	.	1000	14.1178	4878.65	4874.1	598	Promoter (<=1kb)	447	241149576	241169856	20281	1	ENSG00000115685	ENST00000438799	0	5510	PPP1R7	protein phosphatase 1 regulatory subunit 7
20	18496066	18497467	1402	*	.	1000	27.7144	4877.22	4872.67	1177	Promoter (<=1kb)	465	18486540	18497225	10686	2	ENSG00000089050	ENST00000337227	0	10741	RBBP9	RB binding protein 9, serine hydrolase
3	50358847	50359999	1153	*	.	1000	21.7734	4874.84	4870.29	775	Promoter (<=1kb)	448	50354750	50359521	4772	2	ENSG00000126062	ENST00000266025	0	11070	TMEM115	transmembrane protein 115
4	82284496	82285654	1159	*	.	1000	23.4936	4873.69	4869.14	576	Promoter (<=1kb)	449	82284971	82297513	12543	1	ENSG00000284516	ENST00000640685	0	105377307	VAMP9P	vesicle associated membrane protein 9, pseudogene
2	2613133	2614016	884	*	.	1000	22.468	4872.53	4867.99	416	Distal Intergenic	447	2641989	2656630	14642	2	ENSG00000234929	ENST00000414065	42614	NA	NA	NA
2	69741197	69742560	1364	*	.	1000	13.0351	4869.37	4864.83	871	Promoter (<=1kb)	447	69741974	69825781	83808	1	ENSG00000196975	ENST00000409920	0	307	ANXA4	annexin A4
2	121648583	121650408	1826	*	.	1000	17.3699	4867.83	4863.29	1019	Promoter (<=1kb)	447	121337776	121649462	311687	2	ENSG00000074054	ENST00000409078	0	23332	CLASP1	cytoplasmic linker associated protein 1
11	57310769	57311938	1170	*	.	1000	16.4552	4863.43	4858.89	757	Promoter (<=1kb)	456	57309832	57311469	1638	2	ENSG00000149115	ENST00000530920	0	85456	TNKS1BP1	tankyrase 1 binding protein 1
17	75978495	75980291	1797	*	.	1000	15.0621	4862.31	4857.77	1059	Promoter (<=1kb)	462	75941507	75979166	37660	2	ENSG00000161533	ENST00000293217	0	51	ACOX1	acyl-CoA oxidase 1
5	146446781	146447879	1099	*	.	1000	15.6811	4861.21	4856.67	220	Promoter (<=1kb)	450	146447311	146480216	32906	1	ENSG00000113649	ENST00000507175	0	10915	TCERG1	transcription elongation regulator 1
5	69166639	69167837	1199	*	.	1000	21.5188	4861.02	4856.48	434	Promoter (<=1kb)	450	69167135	69177358	10224	1	ENSG00000134057	ENST00000506572	0	891	CCNB1	cyclin B1
10	86399815	86401765	1951	*	.	1000	12.325	4858.31	4853.77	250	Promoter (<=1kb)	455	86395187	86400943	5757	2	ENSG00000287475	ENST00000670831	0	NA	NA	NA
19	38223790	38224854	1065	*	.	1000	12.337	4857.59	4853.05	486	Promoter (<=1kb)	464	38211006	38224222	13217	2	ENSG00000011332	ENST00000355526	0	8193	DPF1	double PHD fingers 1
10	79825404	79827332	1929	*	.	1000	16.1998	4856.31	4851.77	1169	Promoter (<=1kb)	455	79691500	79826516	135017	2	ENSG00000225484	ENST00000601369	0	101060691	NUTM2B-AS1	NUTM2B antisense RNA 1
1	147669377	147671131	1755	*	.	1000	18.7357	4855.36	4850.82	1184	Promoter (<=1kb)	446	147642230	147670524	28295	2	ENSG00000162836	ENST00000583509	0	51205	ACP6	acid phosphatase 6, lysophosphatidic
2	74439428	74441268	1841	*	.	1000	18.0704	4852.84	4848.3	1145	Promoter (<=1kb)	447	74425836	74440583	14748	2	ENSG00000114993	ENST00000305557	0	6242	RTKN	rhotekin
2	74481939	74483656	1718	*	.	1000	15.151	4852.55	4848.01	1085	Promoter (<=1kb)	447	74483073	74494559	11487	1	ENSG00000115282	ENST00000489152	0	64427	TTC31	tetratricopeptide repeat domain 31
5	131170553	131171725	1173	*	.	1000	18.0835	4851.15	4846.62	381	Promoter (<=1kb)	450	131170944	131199966	29023	1	ENSG00000186687	ENST00000510516	0	90624	LYRM7	LYR motif containing 7
3	97821404	97822838	1435	*	.	1000	18.8055	4850.18	4845.64	567	Promoter (<=1kb)	448	97822011	97944984	122974	1	ENSG00000080200	ENST00000389622	0	131544	CRYBG3	crystallin beta-gamma domain containing 3
8	102411343	102413265	1923	*	.	1000	18.2795	4850.13	4845.6	1574	Promoter (<=1kb)	453	102252273	102412700	160428	2	ENSG00000104517	ENST00000520539	0	51366	UBR5	ubiquitin protein ligase E3 component n-recognin 5
9	128634953	128636869	1917	*	.	1000	11.8651	4848.61	4844.07	525	Promoter (<=1kb)	454	128634695	128636063	1369	2	ENSG00000119333	ENST00000483181	0	89891	DYNC2I2	dynein 2 intermediate chain 2
11	72079826	72081387	1562	*	.	1000	15.5357	4846.48	4841.95	813	Promoter (<=1kb)	456	72002864	72080389	77526	2	ENSG00000137497	ENST00000351960	0	4926	NUMA1	nuclear mitotic apparatus protein 1
12	114683460	114685150	1691	*	.	1000	11.261	4844.96	4840.43	1005	Promoter (<=1kb)	457	114670255	114683590	13336	2	ENSG00000135111	ENST00000257566	0	6926	TBX3	T-box transcription factor 3
5	36150842	36152594	1753	*	.	1000	19.252	4844.3	4839.77	1195	Promoter (<=1kb)	450	36151989	36184041	32053	1	ENSG00000145604	ENST00000274254	0	6502	SKP2	S-phase kinase associated protein 2
2	47344883	47345822	940	*	.	1000	20.2121	4842.46	4837.93	253	Promoter (<=1kb)	447	47345158	47386900	41743	1	ENSG00000119888	ENST00000405271	0	4072	EPCAM	epithelial cell adhesion molecule
2	70190176	70191416	1241	*	.	1000	14.9738	4841.89	4837.35	953	Promoter (<=1kb)	447	70149885	70191019	41135	2	ENSG00000115998	ENST00000264434	0	54980	C2orf42	chromosome 2 open reading frame 42
20	46688930	46690051	1122	*	.	1000	17.5962	4840.43	4835.9	671	Promoter (<=1kb)	465	46684365	46689444	5080	2	ENSG00000172315	ENST00000372114	0	112858	TP53RK	TP53 regulating kinase
11	9572775	9573928	1154	*	.	1000	11.8243	4840.14	4835.61	656	Promoter (<=1kb)	456	9573670	9589985	16316	1	ENSG00000166483	ENST00000450114	0	7465	WEE1	WEE1 G2 checkpoint kinase
19	57410675	57411963	1289	*	.	1000	25.9525	4839.72	4835.19	439	Promoter (<=1kb)	464	57411161	57421934	10774	1	ENSG00000186272	ENST00000307658	0	7565	ZNF17	zinc finger protein 17
12	56299382	56300963	1582	*	.	1000	15.7082	4837.12	4832.59	1061	Promoter (<=1kb)	457	56271699	56300318	28620	2	ENSG00000062485	ENST00000549143	0	1431	CS	citrate synthase
20	3767495	3769112	1618	*	.	1000	11.8056	4833.6	4829.07	433	Promoter (<=1kb)	465	3753508	3767728	14221	2	ENSG00000101220	ENST00000217195	0	54976	C20orf27	chromosome 20 open reading frame 27
X	155215811	155217308	1498	*	.	1000	21.2259	4832.76	4828.24	545	Promoter (<=1kb)	468	155216460	155239841	23382	1	ENSG00000155959	ENST00000286428	0	7411	VBP1	VHL binding protein 1
1	167721065	167722679	1615	*	.	1000	16.2585	4831.5	4826.97	848	Promoter (<=1kb)	446	167721192	167722014	823	1	ENSG00000197965	ENST00000487858	0	9019	MPZL1	myelin protein zero like 1
3	149085581	149086989	1409	*	.	1000	21.3623	4831.26	4826.74	997	Promoter (<=1kb)	448	149030127	149086522	56396	2	ENSG00000071794	ENST00000465259	0	6596	HLTF	helicase like transcription factor
5	134505809	134506998	1190	*	.	1000	12.7905	4831.01	4826.48	509	Promoter (<=1kb)	450	134506552	134509229	2678	1	ENSG00000251169	ENST00000515627	0	101927934	LINC01843	long intergenic non-protein coding RNA 1843
5	132866046	132867256	1211	*	.	1000	17.8548	4827.12	4822.59	469	Promoter (<=1kb)	450	132861181	132866079	4899	2	ENSG00000164404	ENST00000621295	0	2661	GDF9	growth differentiation factor 9
10	93495560	93497008	1449	*	.	1000	18.7587	4826.3	4821.78	928	Promoter (<=1kb)	455	93496612	93529092	32481	1	ENSG00000138180	ENST00000371485	0	55165	CEP55	centrosomal protein 55
1	150629036	150630123	1088	*	.	1000	14.4507	4824.62	4820.1	661	Promoter (<=1kb)	446	150600851	150629566	28716	2	ENSG00000143420	ENST00000369016	0	2029	ENSA	endosulfine alpha
5	60944786	60946240	1455	*	.	1000	21.8886	4823.46	4818.93	328	Promoter (<=1kb)	450	60866454	60945070	78617	2	ENSG00000049167	ENST00000676185	0	1161	ERCC8	ERCC excision repair 8, CSA ubiquitin ligase complex subunit
5	177351085	177352438	1354	*	.	1000	20.2196	4820.96	4816.44	848	Promoter (<=1kb)	450	177331567	177351668	20102	2	ENSG00000169223	ENST00000303127	0	10960	LMAN2	lectin, mannose binding 2
15	67253973	67255214	1242	*	.	1000	15.9479	4817.61	4813.09	730	Promoter (<=1kb)	460	67200667	67254661	53995	2	ENSG00000103591	ENST00000261880	0	79719	AAGAB	alpha and gamma adaptin binding protein
17	35808909	35810114	1206	*	.	1000	14.1848	4817.09	4812.57	491	Promoter (<=1kb)	462	35809482	35811584	2103	1	ENSG00000270647	ENST00000604434	0	8148	TAF15	TATA-box binding protein associated factor 15
7	56105974	56106969	996	*	.	1000	22.9972	4816.94	4812.42	565	Promoter (<=1kb)	452	56101573	56106476	4904	2	ENSG00000106153	ENST00000395422	0	51142	CHCHD2	coiled-coil-helix-coiled-coil-helix domain containing 2
12	62466035	62467664	1630	*	.	1000	21.7546	4816.63	4812.11	715	Promoter (<=1kb)	457	62466817	62597583	130767	1	ENSG00000061987	ENST00000641654	0	23041	MON2	MON2 homolog, regulator of endosome-to-Golgi trafficking
20	45812000	45813377	1378	*	.	1000	19.3265	4812.04	4807.52	513	Promoter (<=1kb)	465	45812576	45816953	4378	1	ENSG00000175063	ENST00000405520	0	11065	UBE2C	ubiquitin conjugating enzyme E2 C
20	2840075	2841554	1480	*	.	1000	20.8579	4809.79	4805.28	628	Promoter (<=1kb)	465	2835314	2840655	5342	2	ENSG00000132635	ENST00000360652	0	64773	PCED1A	PC-esterase domain containing 1A
16	58629295	58630679	1385	*	.	1000	13.9237	4809.53	4805.01	772	Promoter (<=1kb)	461	58519951	58629826	109876	2	ENSG00000125107	ENST00000317147	0	23019	CNOT1	CCR4-NOT transcription complex subunit 1
14	58297485	58299451	1967	*	.	1000	13.0185	4809.49	4804.98	982	Promoter (<=1kb)	459	58298504	58373730	75227	1	ENSG00000032219	ENST00000348476	0	5926	ARID4A	AT-rich interaction domain 4A
19	45729888	45731431	1544	*	.	1000	19.0494	4807.93	4803.41	1076	Promoter (<=1kb)	464	45710629	45730896	20268	2	ENSG00000177051	ENST00000317683	0	23403	FBXO46	F-box protein 46
17	82494119	82495121	1003	*	.	1000	11.1004	4806.88	4802.37	545	Distal Intergenic	462	82484808	82488259	3452	1	ENSG00000141562	ENST00000578820	9311	26502	NARF	nuclear prelamin A recognition factor
12	120686254	120687550	1297	*	.	1000	12.5491	4806.83	4802.31	207	Promoter (<=1kb)	457	120687149	120701859	14711	1	ENSG00000110917	ENST00000228506	0	9761	MLEC	malectin
17	40287290	40288757	1468	*	.	1000	15.0362	4804.66	4800.14	469	Promoter (<=1kb)	462	40287879	40304657	16779	1	ENSG00000094804	ENST00000209728	0	990	CDC6	cell division cycle 6
15	65517099	65518140	1042	*	.	1000	19.5039	4802.06	4797.54	686	Promoter (<=1kb)	460	65442463	65517273	74811	2	ENSG00000074603	ENST00000341861	0	54878	DPP8	dipeptidyl peptidase 8
9	92764757	92765983	1227	*	.	1000	14.2976	4801.62	4797.11	236	Promoter (<=1kb)	454	92711363	92764812	53450	2	ENSG00000185963	ENST00000375512	0	23299	BICD2	BICD cargo adaptor 2
12	54280438	54281522	1085	*	.	1000	9.83412	4800.45	4795.94	170	Promoter (<=1kb)	457	54280663	54285229	4567	1	ENSG00000135486	ENST00000677375	0	3178	HNRNPA1	heterogeneous nuclear ribonucleoprotein A1
17	28951155	28952743	1589	*	.	1000	10.7303	4796.47	4791.96	1330	Promoter (<=1kb)	462	28905250	28951518	46269	2	ENSG00000109118	ENST00000332830	0	57649	PHF12	PHD finger protein 12
17	6443514	6444843	1330	*	.	1000	16.011	4796.27	4791.75	764	Promoter (<=1kb)	462	6444441	6451065	6625	1	ENSG00000129195	ENST00000250056	0	54478	PIMREG	PICALM interacting mitotic regulator
14	54509354	54510555	1202	*	.	1000	19.5268	4795.92	4791.41	378	Promoter (<=1kb)	459	54509812	54538281	28470	1	ENSG00000100532	ENST00000554791	0	10668	CGRRF1	cell growth regulator with ring finger domain 1
15	90387494	90388980	1487	*	.	1000	14.9449	4795.43	4790.92	523	Promoter (<=1kb)	460	90388242	90502239	113998	1	ENSG00000140575	ENST00000268182	0	8826	IQGAP1	IQ motif containing GTPase activating protein 1
5	154038192	154039482	1291	*	.	1000	23.4823	4795.31	4790.8	704	Promoter (<=1kb)	450	154038959	154054052	15094	1	ENSG00000037749	ENST00000439768	0	4238	MFAP3	microfibril associated protein 3
6	20211948	20213095	1148	*	.	1000	20.1086	4794.42	4789.91	600	Promoter (<=1kb)	451	20099684	20212469	112786	2	ENSG00000172197	ENST00000324607	0	154141	MBOAT1	membrane bound O-acyltransferase domain containing 1
2	190319004	190320200	1197	*	.	1000	18.4056	4793.63	4789.12	967	Promoter (<=1kb)	447	190203920	190319826	115907	2	ENSG00000198130	ENST00000359678	0	26275	HIBCH	3-hydroxyisobutyryl-CoA hydrolase
2	60755989	60757323	1335	*	.	1000	22.0513	4792.11	4787.6	211	Promoter (<=1kb)	447	60756253	60798468	42216	1	ENSG00000115421	ENST00000496283	0	64895	PAPOLG	poly(A) polymerase gamma
7	39622897	39624311	1415	*	.	1000	18.2938	4791.49	4786.98	618	Promoter (<=1kb)	452	39623565	39706391	82827	1	ENSG00000006451	ENST00000468201	0	5898	RALA	RAS like proto-oncogene A
5	111511879	111513376	1498	*	.	1000	19.9496	4790.08	4785.57	818	Promoter (<=1kb)	450	111496033	111512535	16503	2	ENSG00000164211	ENST00000296632	0	134429	STARD4	StAR related lipid transfer domain containing 4
7	73234800	73236292	1493	*	.	1000	15.7649	4788.36	4783.85	796	Exon (ENST00000423083/ENSG00000182487, exon 7 of 8)	452	73220646	73235787	15142	1	ENSG00000182487	ENST00000435988	14154	654816	NCF1B	neutrophil cytosolic factor 1B pseudogene
9	62837263	62838744	1482	*	.	1000	28.3591	4786.78	4782.28	1140	Promoter (<=1kb)	454	62837139	62838302	1164	2	ENSG00000229422	ENST00000417533	0	NA	NA	NA
17	45060587	45061882	1296	*	.	1000	15.0798	4785.69	4781.19	660	Promoter (<=1kb)	462	45061271	45108980	47710	1	ENSG00000136448	ENST00000676828	0	4836	NMT1	N-myristoyltransferase 1
9	129641561	129642736	1176	*	.	1000	15.1443	4785.58	4781.07	751	Promoter (<=1kb)	454	129634604	129642169	7566	2	ENSG00000148331	ENST00000450050	0	140459	ASB6	ankyrin repeat and SOCS box containing 6
7	101251801	101252979	1179	*	.	1000	22.9724	4784.39	4779.88	627	Promoter (<=1kb)	452	101239594	101252316	12723	2	ENSG00000214253	ENST00000474120	0	51024	FIS1	fission, mitochondrial 1
5	33440307	33441750	1444	*	.	1000	16.0429	4784.39	4779.88	538	Promoter (<=1kb)	450	33440696	33467933	27238	1	ENSG00000113407	ENST00000502553	0	6897	TARS1	threonyl-tRNA synthetase 1
3	28241005	28242109	1105	*	.	1000	21.6221	4784.06	4779.56	492	Promoter (<=1kb)	448	28241584	28319762	78179	1	ENSG00000187118	ENST00000477739	0	152100	CMC1	C-X9-C motif containing 1
16	3400571	3401886	1316	*	.	1000	18.4644	4782.17	4777.66	539	Promoter (<=1kb)	461	3401215	3409364	8150	1	ENSG00000103343	ENST00000268655	0	7727	ZNF174	zinc finger protein 174
11	76444330	76446112	1783	*	.	1000	14.3176	4777.42	4772.92	401	Promoter (<=1kb)	456	76444923	76497231	52309	1	ENSG00000158636	ENST00000427574	0	56946	EMSY	EMSY transcriptional repressor, BRCA2 interacting
3	111674175	111675359	1185	*	.	1000	16.689	4776.79	4772.29	407	Promoter (<=1kb)	448	111674676	111726996	52321	1	ENSG00000240891	ENST00000636933	0	257068	PLCXD2	phosphatidylinositol specific phospholipase C X domain containing 2
14	92747536	92748986	1451	*	.	1000	23.1446	4776.4	4771.9	1158	Promoter (<=1kb)	459	92703807	92748612	44806	2	ENSG00000100600	ENST00000555699	0	5641	LGMN	legumain
3	122382893	122384743	1851	*	.	1000	16.1166	4776.39	4771.89	1232	Promoter (<=1kb)	448	122384161	122412322	28162	1	ENSG00000114023	ENST00000693245	0	26355	FAM162A	family with sequence similarity 162 member A
17	7572075	7574114	2040	*	.	1000	10.4478	4775.67	4771.17	503	Promoter (<=1kb)	462	7572824	7575171	2348	1	ENSG00000161960	ENST00000584054	0	1973	EIF4A1	eukaryotic translation initiation factor 4A1
17	54967600	54969439	1840	*	.	1000	18.5459	4774.29	4769.79	1089	Promoter (<=1kb)	462	54951902	54968653	16752	2	ENSG00000166260	ENST00000576370	0	1353	COX11	cytochrome c oxidase copper chaperone COX11
8	117520062	117521577	1516	*	.	1000	23.574	4773.82	4769.32	562	Promoter (<=1kb)	453	117520713	117540262	19550	1	ENSG00000164758	ENST00000297347	0	90390	MED30	mediator complex subunit 30
2	26033110	26034834	1725	*	.	1000	9.91285	4773.76	4769.26	920	Promoter (<=1kb)	447	26034084	26137454	103371	1	ENSG00000084733	ENST00000264710	0	10890	RAB10	RAB10, member RAS oncogene family
5	119070126	119071837	1712	*	.	1000	13.2509	4770.87	4766.37	801	Promoter (<=1kb)	450	119071087	119249127	178041	1	ENSG00000172869	ENST00000539542	0	1657	DMXL1	Dmx like 1
7	35800162	35802152	1991	*	.	1000	14.4257	4770.32	4765.82	882	Promoter (<=1kb)	452	35800932	35907105	106174	1	ENSG00000122545	ENST00000399034	0	989	SEPTIN7	septin 7
1	156766392	156768261	1870	*	.	1000	15.6286	4770.11	4765.61	1058	Promoter (<=1kb)	446	156767535	156800815	33281	1	ENSG00000143294	ENST00000271526	0	5546	PRCC	proline rich mitotic checkpoint control factor
12	2812399	2813337	939	*	.	1000	16.2363	4769.52	4765.02	180	Promoter (<=1kb)	457	2812622	2859791	47170	1	ENSG00000111203	ENST00000644123	0	55846	ITFG2	integrin alpha FG-GAP repeat containing 2
7	76511586	76513462	1877	*	.	1000	11.8278	4761.29	4756.79	865	Promoter (<=1kb)	452	76511535	76514048	2514	1	ENSG00000243566	ENST00000469114	51	105375355	UPK3B	uroplakin 3B
7	90211014	90212480	1467	*	.	1000	17.5997	4760.65	4756.16	744	Promoter (<=1kb)	452	90211686	90237631	25946	1	ENSG00000157214	ENST00000287908	0	261729	STEAP2	STEAP2 metalloreductase
17	74872545	74873774	1230	*	.	1000	14.3567	4760.33	4755.83	702	Promoter (<=1kb)	462	74862497	74872994	10498	2	ENSG00000161513	ENST00000293195	0	2232	FDXR	ferredoxin reductase
15	75367643	75369027	1385	*	.	1000	12.0047	4758.69	4754.19	356	Promoter (<=1kb)	460	75355792	75368592	12801	2	ENSG00000140400	ENST00000569482	0	4123	MAN2C1	mannosidase alpha class 2C member 1
11	86954804	86956694	1891	*	.	1000	16.3432	4758.04	4753.55	633	Promoter (<=1kb)	456	86945679	86955395	9717	2	ENSG00000174804	ENST00000531380	0	8322	FZD4	frizzled class receptor 4
7	93231743	93232910	1168	*	.	1000	21.8187	4754.59	4750.1	552	Promoter (<=1kb)	452	93232340	93276428	44089	1	ENSG00000004766	ENST00000251739	0	55610	VPS50	VPS50 subunit of EARP/GARPII complex
13	60163257	60164539	1283	*	.	1000	24.9016	4752.8	4748.31	762	Promoter (<=1kb)	458	59665583	60163928	498346	2	ENSG00000139734	ENST00000400324	0	81624	DIAPH3	diaphanous related formin 3
2	28869574	28870948	1375	*	.	1000	21.6223	4752.78	4748.29	832	Promoter (<=1kb)	447	28849821	28870309	20489	2	ENSG00000171103	ENST00000306108	0	55006	TRMT61B	tRNA methyltransferase 61B
1	16872213	16873752	1540	*	.	1000	17.0753	4752.65	4748.15	559	Promoter (<=1kb)	446	16872226	16874024	1799	1	ENSG00000228549	ENST00000668460	0	112267871	LOC112267871	uncharacterized LOC112267871
5	131796245	131797799	1555	*	.	1000	15.9154	4751.38	4746.89	927	Promoter (<=1kb)	450	131641714	131796921	155208	2	ENSG00000217128	ENST00000307968	0	96459	FNIP1	folliculin interacting protein 1
12	95942223	95943807	1585	*	.	1000	15.1693	4747.84	4743.35	771	Promoter (<=1kb)	457	95943331	95968720	25390	1	ENSG00000139344	ENST00000266736	0	144193	AMDHD1	amidohydrolase domain containing 1
2	135741369	135742728	1360	*	.	1000	14.7405	4746.12	4741.63	297	Promoter (<=1kb)	447	135741734	135754188	12455	1	ENSG00000144224	ENST00000415164	0	23190	UBXN4	UBX domain protein 4
15	72116760	72118721	1962	*	.	1000	13.7074	4745.78	4741.29	846	Promoter (<=1kb)	460	71822291	72118150	295860	2	ENSG00000066933	ENST00000356056	0	4649	MYO9A	myosin IXA
5	132556479	132557828	1350	*	.	1000	19.421	4742.49	4738	421	Promoter (<=1kb)	450	132556930	132591985	35056	1	ENSG00000113522	ENST00000651541	0	10111	RAD50	RAD50 double strand break repair protein
3	197736035	197737638	1604	*	.	1000	20.8228	4740.92	4736.44	959	Promoter (<=1kb)	448	197737179	197777001	39823	1	ENSG00000122068	ENST00000428738	0	84248	FYTTD1	forty-two-three domain containing 1
7	143901220	143902415	1196	*	.	1000	17.0342	4739.55	4735.07	1004	Promoter (<=1kb)	452	143851375	143902176	50802	2	ENSG00000198420	ENST00000479870	0	9747	TCAF1	TRPM8 channel associated factor 1
11	3797000	3798290	1291	*	.	1000	13.0446	4737.76	4733.27	709	Promoter (<=1kb)	456	3675011	3797792	122782	2	ENSG00000110713	ENST00000359171	0	4928	NUP98	nucleoporin 98 and 96 precursor
14	54396458	54398083	1626	*	.	1000	16.2129	4736.33	4731.85	493	Promoter (<=1kb)	459	54396849	54417951	21103	1	ENSG00000100526	ENST00000555837	0	1033	CDKN3	cyclin dependent kinase inhibitor 3
14	96796908	96798211	1304	*	.	1000	24.7738	4735.52	4731.04	371	Promoter (<=1kb)	459	96797304	96881612	84309	1	ENSG00000100749	ENST00000553683	0	7443	VRK1	VRK serine/threonine kinase 1
15	99732782	99734008	1227	*	.	1000	19.1234	4734.13	4729.64	739	Promoter (<=1kb)	460	99715697	99733391	17695	2	ENSG00000183060	ENST00000604213	0	145748	LYSMD4	LysM domain containing 4
7	151027898	151029098	1201	*	.	1000	14.5256	4733.41	4728.92	498	Promoter (<=1kb)	452	151028422	151047782	19361	1	ENSG00000197150	ENST00000542328	0	11194	ABCB8	ATP binding cassette subfamily B member 8
17	64836443	64838100	1658	*	.	1000	15.5263	4732.74	4728.25	778	Promoter (<=1kb)	462	64779259	64837139	57881	2	ENSG00000214176	ENST00000578036	0	NA	NA	NA
2	71226717	71227757	1041	*	.	1000	14.5534	4729.89	4725.41	710	Promoter (<=1kb)	447	71182738	71227103	44366	2	ENSG00000124374	ENST00000244221	0	400961	PAIP2B	poly(A) binding protein interacting protein 2B
11	2399631	2401060	1430	*	.	1000	12.3385	4729.86	4725.37	1068	Promoter (<=1kb)	456	2400488	2403878	3391	1	ENSG00000184281	ENST00000380996	0	10078	TSSC4	tumor suppressing subtransferable candidate 4
12	11171011	11171829	819	*	.	1000	22.2037	4728.61	4724.13	643	Promoter (<=1kb)	457	10937408	11171573	234166	2	ENSG00000212127	ENST00000381852	0	50840	TAS2R14	taste 2 receptor member 14
3	100491906	100493032	1127	*	.	1000	20.0651	4727.32	4722.84	568	Promoter (<=1kb)	448	100492619	100577444	84826	1	ENSG00000181458	ENST00000323523	0	55076	TMEM45A	transmembrane protein 45A
20	54122971	54124363	1393	*	.	1000	13.498	4726.12	4721.64	824	Distal Intergenic	465	54154370	54157298	2929	2	ENSG00000019186	ENST00000460643	32935	1591	CYP24A1	cytochrome P450 family 24 subfamily A member 1
8	730601	731823	1223	*	.	1000	19.3155	4725.95	4721.47	680	Promoter (<=1kb)	453	614746	731197	116452	2	ENSG00000104714	ENST00000522706	0	157697	ERICH1	glutamate rich 1
5	115543812	115545431	1620	*	.	1000	17.6329	4724.89	4720.41	964	Promoter (<=1kb)	450	115520908	115544775	23868	2	ENSG00000145780	ENST00000274457	0	56929	FEM1C	fem-1 homolog C
1	214602743	214604275	1533	*	.	1000	17.6242	4722.07	4717.59	420	Promoter (<=1kb)	446	214603195	214615190	11996	1	ENSG00000117724	ENST00000464322	0	1063	CENPF	centromere protein F
10	96513356	96514630	1275	*	.	1000	15.7742	4720.19	4715.71	626	Promoter (<=1kb)	455	96364608	96513926	149319	2	ENSG00000095587	ENST00000357947	0	7093	TLL2	tolloid like 2
9	133478247	133479745	1499	*	.	1000	19.4597	4717.99	4713.52	921	Promoter (<=1kb)	454	133471094	133479099	8006	2	ENSG00000160326	ENST00000371899	0	11182	SLC2A6	solute carrier family 2 member 6
12	54279404	54280346	943	*	.	1000	9.76116	4714.35	4709.87	382	Promoter (<=1kb)	457	54230942	54280122	49181	2	ENSG00000094916	ENST00000209875	0	23468	CBX5	chromobox 5
5	65623881	65625292	1412	*	.	1000	19.66	4714.28	4709.81	482	Promoter (<=1kb)	450	65589690	65624333	34644	2	ENSG00000113595	ENST00000231524	0	373	TRIM23	tripartite motif containing 23
2	105037413	105038719	1307	*	.	1000	19.9989	4713.84	4709.36	572	Promoter (<=1kb)	447	105038069	105099960	61892	1	ENSG00000135972	ENST00000258455	0	64965	MRPS9	mitochondrial ribosomal protein S9
1	155323703	155325599	1897	*	.	1000	8.26993	4710.72	4706.25	733	Promoter (<=1kb)	446	155323937	155331114	7178	1	ENSG00000160753	ENST00000368347	0	23623	RUSC1	RUN and SH3 domain containing 1
6	116570839	116571852	1014	*	.	1000	19.1411	4710.09	4705.62	445	Promoter (<=1kb)	451	116571409	116590298	18890	1	ENSG00000111832	ENST00000368590	0	51389	RWDD1	RWD domain containing 1
1	222464702	222466027	1326	*	.	1000	21.3659	4708	4703.53	919	Promoter (2-3kb)	446	222468094	222470882	2789	1	ENSG00000234419	ENST00000422015	-2067	NA	NA	NA
15	88620883	88621773	891	*	.	1000	16.3746	4707.83	4703.36	375	Promoter (<=1kb)	460	88621337	88627341	6005	1	ENSG00000181026	ENST00000557787	0	64782	AEN	apoptosis enhancing nuclease
16	70380027	70382163	2137	*	.	1000	12.9458	4706.14	4701.67	1439	Promoter (<=1kb)	461	70379457	70399502	20046	1	ENSG00000260111	ENST00000566960	570	NA	NA	NA
2	165953302	165954372	1071	*	.	1000	17.1648	4705.56	4701.09	582	Promoter (<=1kb)	447	165857493	165953759	96267	2	ENSG00000123607	ENST00000681502	0	79809	TTC21B	tetratricopeptide repeat domain 21B
9	120714168	120715874	1707	*	.	1000	14.0965	4705.4	4700.93	464	Promoter (<=1kb)	454	120600811	120714470	113660	2	ENSG00000106780	ENST00000373930	0	1955	MEGF9	multiple EGF like domains 9
19	58543596	58544696	1101	*	.	1000	15.4947	4702.66	4698.19	428	Promoter (<=1kb)	464	58544064	58550715	6652	1	ENSG00000130726	ENST00000253024	0	10155	TRIM28	tripartite motif containing 28
1	241518854	241520106	1253	*	.	1000	17.0466	4700.95	4696.48	974	Promoter (<=1kb)	446	241497511	241519694	22184	2	ENSG00000091483	ENST00000493477	0	2271	FH	fumarate hydratase
5	157731094	157732108	1015	*	.	1000	20.6012	4698.8	4694.33	642	Promoter (<=1kb)	450	157731420	157739578	8159	1	ENSG00000113272	ENST00000521655	0	54974	THG1L	tRNA-histidine guanylyltransferase 1 like
15	65868841	65870762	1922	*	.	1000	14.6598	4698.02	4693.55	642	Promoter (<=1kb)	460	65869456	65888247	18792	1	ENSG00000103769	ENST00000564910	0	8766	RAB11A	RAB11A, member RAS oncogene family
7	74788307	74789691	1385	*	.	1000	15.5951	4697.97	4693.5	661	3' UTR	452	74783443	74785546	2104	1	ENSG00000158517	ENST00000486097	4864	653361	NCF1	neutrophil cytosolic factor 1
20	23357731	23358518	788	*	.	1000	11.0423	4695.61	4691.14	593	Promoter (<=1kb)	465	23356586	23358175	1590	2	ENSG00000232645	ENST00000687401	0	100505683	LINC01431	long intergenic non-protein coding RNA 1431
1	145858322	145860170	1849	*	.	1000	13.5865	4693.49	4689.02	781	Promoter (<=1kb)	446	145848522	145859045	10524	2	ENSG00000131788	ENST00000369298	0	10401	PIAS3	protein inhibitor of activated STAT 3
19	54007774	54009227	1454	*	.	1000	13.3636	4691.31	4686.84	722	Intron (ENST00000252729/ENSG00000130433, intron 3 of 3)	464	53992878	54012189	19312	1	ENSG00000130433	ENST00000346968	14896	59285	CACNG6	calcium voltage-gated channel auxiliary subunit gamma 6
17	1515527	1517361	1835	*	.	1000	13.4141	4690.25	4685.78	1305	Promoter (<=1kb)	462	1494577	1516612	22036	2	ENSG00000132376	ENST00000421807	0	51763	INPP5K	inositol polyphosphate-5-phosphatase K
5	55711537	55712811	1275	*	.	1000	23.4964	4687.67	4683.21	882	Promoter (<=1kb)	450	55625848	55712324	86477	2	ENSG00000177058	ENST00000396865	0	153129	SLC38A9	solute carrier family 38 member 9
16	31093956	31095149	1194	*	.	1000	16.9578	4686.27	4681.81	924	Promoter (<=1kb)	461	31090842	31094760	3919	2	ENSG00000167397	ENST00000300851	0	79001	VKORC1	vitamin K epoxide reductase complex subunit 1
10	102132352	102134140	1789	*	.	1000	14.1113	4685.69	4681.23	590	Promoter (<=1kb)	455	102132994	102150331	17338	1	ENSG00000148840	ENST00000413464	0	23082	PPRC1	PPARG related coactivator 1
2	218269522	218270797	1276	*	.	1000	11.7406	4685.41	4680.95	908	Promoter (<=1kb)	447	218264129	218270137	6009	2	ENSG00000127837	ENST00000248450	0	14	AAMP	angio associated migratory cell protein
9	98056229	98057722	1494	*	.	1000	16.0543	4684.73	4680.26	285	Promoter (<=1kb)	454	98056732	98083077	26346	1	ENSG00000095380	ENST00000210444	0	54187	NANS	N-acetylneuraminate synthase
12	79934221	79935640	1420	*	.	1000	13.7623	4684.07	4679.61	894	Promoter (<=1kb)	457	79773563	79935455	161893	2	ENSG00000058272	ENST00000261207	0	4659	PPP1R12A	protein phosphatase 1 regulatory subunit 12A
10	60777955	60779224	1270	*	.	1000	18.7988	4678.48	4674.02	442	Promoter (<=1kb)	455	60778331	60791969	13639	1	ENSG00000170312	ENST00000519078	0	983	CDK1	cyclin dependent kinase 1
16	2214756	2216061	1306	*	.	1000	12.9995	4676.49	4672.03	406	Promoter (<=1kb)	461	2211593	2214840	3248	2	ENSG00000184207	ENST00000333503	0	283871	PGP	phosphoglycolate phosphatase
8	61713780	61715078	1299	*	.	1000	10.7494	4674.87	4670.41	978	Promoter (<=1kb)	453	61500556	61714592	214037	2	ENSG00000198363	ENST00000379454	0	444	ASPH	aspartate beta-hydroxylase
11	31509141	31510456	1316	*	.	1000	24.3198	4674.81	4670.36	587	Promoter (<=1kb)	456	31509755	31707405	197651	1	ENSG00000109911	ENST00000639878	0	26610	ELP4	elongator acetyltransferase complex subunit 4
5	132293205	132295620	2416	*	.	1000	10.3172	4674.64	4670.18	1113	Promoter (<=1kb)	450	132210381	132295271	84891	2	ENSG00000072682	ENST00000431054	0	8974	P4HA2	prolyl 4-hydroxylase subunit alpha 2
14	51093384	51095920	2537	*	.	1000	11.5978	4674.23	4669.77	1797	Promoter (<=1kb)	459	50975266	51095105	119840	2	ENSG00000100505	ENST00000684578	0	114088	TRIM9	tripartite motif containing 9
17	17027758	17028990	1233	*	.	1000	12.4167	4674.16	4669.7	592	Promoter (<=1kb)	462	17028360	17035057	6698	1	ENSG00000287114	ENST00000659709	0	NA	NA	NA
12	94459293	94460754	1462	*	.	1000	17.7182	4674.01	4669.55	650	Promoter (<=1kb)	457	94307698	94459867	152170	2	ENSG00000173588	ENST00000397809	0	51134	CEP83	centrosomal protein 83
20	23420389	23421904	1516	*	.	1000	21.5771	4673.79	4669.33	1153	Promoter (<=1kb)	465	23374519	23421519	47001	2	ENSG00000125814	ENST00000398425	0	63908	NAPB	NSF attachment protein beta
19	58380089	58381474	1386	*	.	1000	12.1076	4672.88	4668.42	1004	Promoter (<=1kb)	464	58367618	58381022	13405	2	ENSG00000152475	ENST00000427624	0	116412	ZNF837	zinc finger protein 837
17	28356936	28357979	1044	*	.	1000	21.8795	4672.6	4668.14	609	Promoter (<=1kb)	462	28346633	28357527	10895	2	ENSG00000004142	ENST00000540200	0	26073	POLDIP2	DNA polymerase delta interacting protein 2
1	202341380	202342599	1220	*	.	1000	19.5477	4671.74	4667.29	657	Promoter (<=1kb)	446	202331657	202341936	10280	2	ENSG00000077152	ENST00000646651	0	29089	UBE2T	ubiquitin conjugating enzyme E2 T
10	1048296	1049946	1651	*	.	1000	12.3237	4668.47	4664.01	1048	Promoter (<=1kb)	455	1049538	1132297	82760	1	ENSG00000047056	ENST00000358220	0	22884	WDR37	WD repeat domain 37
10	103395800	103397175	1376	*	.	1000	22.5684	4668.2	4663.75	818	Promoter (<=1kb)	455	103396626	103446281	49656	1	ENSG00000148843	ENST00000649849	0	22984	PDCD11	programmed cell death 11
9	20683440	20684934	1495	*	.	1000	17.7442	4668.13	4663.68	778	Promoter (<=1kb)	454	20684259	20995950	311692	1	ENSG00000188352	ENST00000338382	0	54914	FOCAD	focadhesin
2	210476201	210477104	904	*	.	1000	25.0165	4666.95	4662.49	558	Promoter (<=1kb)	447	210431249	210476739	45491	2	ENSG00000115365	ENST00000443314	0	10314	LANCL1	LanC like 1
3	38164700	38166384	1685	*	.	1000	13.4822	4666.29	4661.83	446	Promoter (<=1kb)	448	38165089	38183047	17959	1	ENSG00000172939	ENST00000492714	0	9943	OXSR1	oxidative stress responsive kinase 1
3	98593049	98594265	1217	*	.	1000	19.8722	4666.25	4661.79	677	Promoter (<=1kb)	448	98579446	98593611	14166	2	ENSG00000080819	ENST00000647941	0	1371	CPOX	coproporphyrinogen oxidase
7	134432293	134433358	1066	*	.	1000	13.9298	4666.22	4661.77	559	Promoter (<=1kb)	452	134368737	134432460	63724	2	ENSG00000273297	ENST00000687475	0	105375519	LOC105375519	uncharacterized LOC105375519
5	41903745	41904668	924	*	.	1000	20.1256	4665.32	4660.86	411	Promoter (<=1kb)	450	41904188	41911179	6992	1	ENSG00000205765	ENST00000505931	0	285636	C5orf51	chromosome 5 open reading frame 51
12	102119623	102120932	1310	*	.	1000	18.7747	4665.26	4660.81	518	Promoter (<=1kb)	457	102073103	102120114	47012	2	ENSG00000075188	ENST00000552283	0	79023	NUP37	nucleoporin 37
19	57279709	57281267	1559	*	.	1000	16.415	4665.25	4660.8	661	Promoter (<=1kb)	464	57280051	57292534	12484	1	ENSG00000197714	ENST00000537645	0	10794	ZNF460	zinc finger protein 460
14	60164465	60165783	1319	*	.	1000	19.8072	4661.76	4657.31	962	Promoter (<=1kb)	459	60144119	60165398	21280	2	ENSG00000100612	ENST00000557185	0	51635	DHRS7	dehydrogenase/reductase 7
15	65610462	65611790	1329	*	.	1000	19.6218	4660.67	4656.22	798	Promoter (<=1kb)	460	65611366	65652929	41564	1	ENSG00000074621	ENST00000434116	0	9187	SLC24A1	solute carrier family 24 member 1
3	172710103	172711760	1658	*	.	1000	16.5025	4659.98	4655.53	1076	Promoter (<=1kb)	448	172630249	172711067	80819	2	ENSG00000144959	ENST00000475381	0	57552	NCEH1	neutral cholesterol ester hydrolase 1
1	170074039	170075035	997	*	.	1000	20.1558	4659.65	4655.2	627	Promoter (<=1kb)	446	169921326	170074588	153263	2	ENSG00000075945	ENST00000367767	0	22920	KIFAP3	kinesin associated protein 3
5	173056047	173057855	1809	*	.	1000	12.1139	4658.54	4654.09	1189	Promoter (<=1kb)	450	173056352	173092330	35979	1	ENSG00000164463	ENST00000522692	0	153222	CREBRF	CREB3 regulatory factor
9	35814394	35815664	1271	*	.	1000	11.5172	4658.19	4653.74	701	Promoter (<=1kb)	454	35814451	35847234	32784	1	ENSG00000137103	ENST00000377996	0	51754	TMEM8B	transmembrane protein 8B
16	66879824	66881295	1472	*	.	1000	20.7915	4658.06	4653.61	695	Promoter (<=1kb)	461	66880515	66884749	4235	1	ENSG00000172840	ENST00000568869	0	57546	PDP2	pyruvate dehyrogenase phosphatase catalytic subunit 2
12	119667426	119668594	1169	*	.	1000	18.1047	4657.29	4652.84	414	Promoter (<=1kb)	457	119667864	119681624	13761	1	ENSG00000111725	ENST00000541640	0	5564	PRKAB1	protein kinase AMP-activated non-catalytic subunit beta 1
17	45424994	45426270	1277	*	.	1000	12.5891	4656.63	4652.18	895	Promoter (<=1kb)	462	45393909	45425631	31723	2	ENSG00000159314	ENST00000376922	0	201176	ARHGAP27	Rho GTPase activating protein 27
12	71685488	71686586	1099	*	.	1000	18.2152	4654.88	4650.43	893	Promoter (<=1kb)	457	71686082	71705047	18966	1	ENSG00000139291	ENST00000266673	0	55266	TMEM19	transmembrane protein 19
15	90157947	90158875	929	*	.	1000	13.3618	4654.02	4649.57	413	Promoter (1-2kb)	460	90160604	90217786	57183	1	ENSG00000185033	ENST00000559322	-1729	10509	SEMA4B	semaphorin 4B
14	24146308	24147758	1451	*	.	1000	12.6962	4653.15	4648.7	1027	Promoter (<=1kb)	459	24146683	24147867	1185	1	ENSG00000092098	ENST00000560875	0	55072	RNF31	ring finger protein 31
3	141737841	141739371	1531	*	.	1000	17.2445	4648.5	4644.06	405	Promoter (<=1kb)	448	141738249	141743027	4779	1	ENSG00000114125	ENST00000498828	0	9616	RNF7	ring finger protein 7
1	43649487	43650782	1296	*	.	1000	16.1113	4647.62	4643.18	532	Promoter (<=1kb)	446	43650149	43705518	55370	1	ENSG00000066135	ENST00000372396	0	9682	KDM4A	lysine demethylase 4A
15	69159986	69162058	2073	*	.	1000	14.3165	4646.39	4641.95	520	Promoter (<=1kb)	460	69160584	69197458	36875	1	ENSG00000138604	ENST00000559798	0	26035	GLCE	glucuronic acid epimerase
20	49045724	49047278	1555	*	.	1000	15.6873	4645.23	4640.78	1057	Promoter (<=1kb)	465	49046246	49096960	50715	1	ENSG00000124207	ENST00000396192	0	1434	CSE1L	chromosome segregation 1 like
1	31714260	31716129	1870	*	.	1000	14.4042	4639.77	4635.33	1040	Distal Intergenic	446	31679230	31704319	25090	2	ENSG00000084636	ENST00000373668	-9941	1307	COL16A1	collagen type XVI alpha 1 chain
14	77320235	77321998	1764	*	.	1000	11.1274	4639.46	4635.01	1156	Promoter (<=1kb)	459	77274956	77320883	45928	2	ENSG00000009830	ENST00000261534	0	29954	POMT2	protein O-mannosyltransferase 2
9	36257646	36259081	1436	*	.	1000	14.6625	4639.09	4634.65	392	Promoter (<=1kb)	454	36214441	36258448	44008	2	ENSG00000159921	ENST00000642385	0	10020	GNE	glucosamine (UDP-N-acetyl)-2-epimerase/N-acetylmannosamine kinase
2	47905622	47907190	1569	*	.	1000	12.0645	4638.59	4634.15	1082	Promoter (<=1kb)	447	47806920	47906498	99579	2	ENSG00000138081	ENST00000403359	0	80204	FBXO11	F-box protein 11
3	9648956	9650310	1355	*	.	1000	25.257	4635.73	4631.29	423	Promoter (<=1kb)	448	9649433	9702393	52961	1	ENSG00000163719	ENST00000353332	0	64419	MTMR14	myotubularin related protein 14
12	49069037	49070451	1415	*	.	1000	19.1562	4635.22	4630.78	985	Promoter (<=1kb)	457	49064676	49069979	5304	2	ENSG00000167550	ENST00000301068	0	121268	RHEBL1	RHEB like 1
10	14837641	14839179	1539	*	.	1000	17.0727	4634.53	4630.09	606	Promoter (<=1kb)	455	14819245	14838037	18793	2	ENSG00000185267	ENST00000465530	0	441549	CDNF	cerebral dopamine neurotrophic factor
1	161468738	161470438	1701	*	.	1000	7.64107	4634.35	4629.91	559	Promoter (<=1kb)	446	161403409	161470523	67115	2	ENSG00000283360	ENST00000637155	85	NA	NA	NA
10	113073413	113074764	1352	*	.	1000	14.6164	4633.59	4629.16	581	Intron (ENST00000627217/ENSG00000148737, intron 5 of 13)	455	113125536	113146096	20561	1	ENSG00000148737	ENST00000349937	-50772	6934	TCF7L2	transcription factor 7 like 2
2	36597086	36598335	1250	*	.	1000	20.0839	4633.23	4628.79	714	Promoter (<=1kb)	447	36552258	36598168	45911	2	ENSG00000171055	ENST00000405912	0	9637	FEZ2	fasciculation and elongation protein zeta 2
1	236280941	236282621	1681	*	.	1000	17.3722	4633.09	4628.65	1157	Promoter (<=1kb)	446	236215101	236281958	66858	2	ENSG00000086619	ENST00000354619	0	56605	ERO1B	endoplasmic reticulum oxidoreductase 1 beta
15	80989164	80990328	1165	*	.	1000	18.9304	4631.72	4627.28	680	Promoter (<=1kb)	460	80946289	80989828	43540	2	ENSG00000117899	ENST00000619987	0	23184	MESD	mesoderm development LRP chaperone
8	144754457	144756090	1634	*	.	1000	15.7889	4631.42	4626.98	1124	Promoter (<=1kb)	453	144720907	144755486	34580	2	ENSG00000198169	ENST00000524394	0	90987	ZNF251	zinc finger protein 251
19	50657841	50659482	1642	*	.	1000	12.8647	4629.94	4625.5	453	Promoter (<=1kb)	464	50658496	50659310	815	1	ENSG00000235034	ENST00000490451	0	342918	C19orf81	chromosome 19 open reading frame 81
17	44344801	44346233	1433	*	.	1000	17.748	4629.17	4624.73	427	Promoter (<=1kb)	462	44345246	44349894	4649	1	ENSG00000030582	ENST00000588170	0	2896	GRN	granulin precursor
9	34988897	34990304	1408	*	.	1000	13.9002	4625.29	4620.85	684	Promoter (<=1kb)	454	34989641	34998431	8791	1	ENSG00000137094	ENST00000453597	0	25822	DNAJB5	DnaJ heat shock protein family (Hsp40) member B5
2	64523968	64525378	1411	*	.	1000	16.4572	4625.23	4620.8	323	Promoter (<=1kb)	447	64524305	64592997	68693	1	ENSG00000119844	ENST00000238855	0	54812	AFTPH	aftiphilin
2	43636727	43638246	1520	*	.	1000	16.6676	4624.82	4620.38	488	Promoter (<=1kb)	447	43637260	43767987	130728	1	ENSG00000152527	ENST00000282406	0	130271	PLEKHH2	pleckstrin homology, MyTH4 and FERM domain containing H2
17	45050801	45051785	985	*	.	1000	18.1107	4624.14	4619.7	761	Promoter (<=1kb)	462	45051610	45109016	57407	1	ENSG00000136448	ENST00000592782	0	4836	NMT1	N-myristoyltransferase 1
7	149239018	149240340	1323	*	.	1000	23.7209	4623.69	4619.25	564	Promoter (<=1kb)	452	149239651	149255606	15956	1	ENSG00000170260	ENST00000335870	0	7988	ZNF212	zinc finger protein 212
2	70257251	70258862	1612	*	.	1000	16.9781	4623.38	4618.95	798	Promoter (<=1kb)	447	70257386	70275084	17699	1	ENSG00000116005	ENST00000422380	0	51449	PCYOX1	prenylcysteine oxidase 1
12	4320461	4321899	1439	*	.	1000	18.9832	4623.12	4618.69	649	Promoter (<=1kb)	457	4321213	4360028	38816	1	ENSG00000078237	ENST00000179259	0	57103	TIGAR	TP53 induced glycolysis regulatory phosphatase
2	43595366	43596691	1326	*	.	1000	17.697	4620.99	4616.55	694	Promoter (<=1kb)	447	43230851	43596038	365188	2	ENSG00000115970	ENST00000405975	0	63892	THADA	THADA armadillo repeat containing
1	147928013	147929209	1197	*	.	1000	22.1973	4616.21	4611.77	372	Promoter (<=1kb)	446	147928393	147993339	64947	1	ENSG00000188092	ENST00000488165	0	51463	GPR89B	G protein-coupled receptor 89B
15	70891797	70893238	1442	*	.	1000	18.9144	4615.14	4610.71	715	Promoter (<=1kb)	460	70881342	70892433	11092	2	ENSG00000129028	ENST00000249861	0	56906	THAP10	THAP domain containing 10
7	32494973	32496406	1434	*	.	1000	15.4126	4614.65	4610.22	478	Promoter (<=1kb)	452	32495426	32552250	56825	1	ENSG00000105778	ENST00000485228	0	23080	AVL9	AVL9 cell migration associated
13	97432715	97434223	1509	*	.	1000	14.5955	4611.84	4607.41	470	Promoter (<=1kb)	458	97434169	97469128	34960	1	ENSG00000125249	ENST00000245304	0	5911	RAP2A	RAP2A, member of RAS oncogene family
10	97445445	97446647	1203	*	.	1000	17.7232	4611.75	4607.31	669	Promoter (<=1kb)	455	97446170	97457366	11197	1	ENSG00000171307	ENST00000370854	0	84287	ZDHHC16	zinc finger DHHC-type palmitoyltransferase 16
7	76317527	76319167	1641	*	.	1000	10.7463	4611.58	4607.15	681	Promoter (<=1kb)	452	76318253	76319790	1538	1	ENSG00000289059	ENST00000685158	0	NA	NA	NA
14	99480695	99482065	1371	*	.	1000	13.3142	4610.84	4606.41	569	Promoter (<=1kb)	459	99481169	99502376	21208	1	ENSG00000090061	ENST00000557165	0	8812	CCNK	cyclin K
17	7213856	7215465	1610	*	.	1000	9.91573	4607.44	4603.01	1263	Promoter (<=1kb)	462	7190675	7213912	23238	2	ENSG00000132535	ENST00000648896	0	1742	DLG4	discs large MAGUK scaffold protein 4
7	158704352	158705826	1475	*	.	1000	17.8183	4607	4602.57	650	Promoter (<=1kb)	452	158631169	158704804	73636	2	ENSG00000146918	ENST00000356309	0	54892	NCAPG2	non-SMC condensin II complex subunit G2
2	27049898	27052282	2385	*	.	1000	8.74877	4606.69	4602.26	1030	Promoter (<=1kb)	447	27051008	27053980	2973	1	ENSG00000084693	ENST00000453161	0	60509	AGBL5	AGBL carboxypeptidase 5
17	48106995	48108388	1394	*	.	1000	17.7433	4605.92	4601.49	506	Promoter (<=1kb)	462	48107549	48119008	11460	1	ENSG00000002919	ENST00000578861	0	29916	SNX11	sorting nexin 11
3	105366053	105367007	955	*	.	1000	9.2967	4603.12	4598.69	639	Promoter (<=1kb)	448	105366909	105576900	209992	1	ENSG00000170017	ENST00000306107	0	214	ALCAM	activated leukocyte cell adhesion molecule
12	48716107	48717473	1367	*	.	1000	17.0282	4603.02	4598.59	684	Promoter (<=1kb)	457	48688458	48716707	28250	2	ENSG00000129315	ENST00000261900	0	904	CCNT1	cyclin T1
2	61016693	61018650	1958	*	.	1000	16.3777	4599.4	4594.98	1020	Promoter (<=1kb)	447	60940222	61018259	78038	2	ENSG00000162927	ENST00000602599	0	150962	PUS10	pseudouridine synthase 10
11	74492721	74494440	1720	*	.	1000	17.3895	4598.81	4594.38	530	Promoter (<=1kb)	456	74493851	74618594	124744	1	ENSG00000077514	ENST00000528481	0	10714	POLD3	DNA polymerase delta 3, accessory subunit
4	6269149	6270285	1137	*	.	1000	22.1852	4598.32	4593.9	557	Promoter (<=1kb)	449	6269849	6302883	33035	1	ENSG00000109501	ENST00000503569	0	7466	WFS1	wolframin ER transmembrane glycoprotein
14	73457460	73458967	1508	*	.	1000	12.9512	4596.95	4592.52	1182	Promoter (<=1kb)	459	73275107	73458617	183511	2	ENSG00000133961	ENST00000554546	0	8650	NUMB	NUMB endocytic adaptor protein
19	29664868	29665918	1051	*	.	1000	15.2863	4595.68	4591.26	504	Promoter (<=1kb)	464	29665459	29674843	9385	1	ENSG00000166289	ENST00000592810	0	79156	PLEKHF1	pleckstrin homology and FYVE domain containing 1
14	81169745	81171074	1330	*	.	1000	22.513	4592.8	4588.38	710	Promoter (<=1kb)	459	81012099	81170429	158331	2	ENSG00000284959	ENST00000646052	0	NA	NA	NA
3	136250168	136251424	1257	*	.	1000	23.9778	4589.45	4585.03	455	Promoter (<=1kb)	448	136250340	136330169	79830	1	ENSG00000114054	ENST00000251654	0	5096	PCCB	propionyl-CoA carboxylase subunit beta
2	222860642	222861711	1070	*	.	1000	15.2532	4588.93	4584.51	326	Promoter (<=1kb)	447	222860942	222942222	81281	1	ENSG00000123983	ENST00000392066	0	2181	ACSL3	acyl-CoA synthetase long chain family member 3
2	153871035	153872516	1482	*	.	1000	13.3108	4586.33	4581.91	718	Promoter (<=1kb)	447	153871922	154453979	582058	1	ENSG00000144278	ENST00000392825	0	114805	GALNT13	polypeptide N-acetylgalactosaminyltransferase 13
2	65227116	65228646	1531	*	.	1000	15.8927	4585.87	4581.45	577	Promoter (<=1kb)	447	65227788	65246737	18950	1	ENSG00000138071	ENST00000476840	0	10097	ACTR2	actin related protein 2
19	35006107	35007196	1090	*	.	1000	11.122	4584.07	4579.65	478	Promoter (2-3kb)	464	35009673	35010478	806	1	ENSG00000089351	ENST00000599476	-2477	57655	GRAMD1A	GRAM domain containing 1A
1	169893215	169894778	1564	*	.	1000	16.7521	4583.54	4579.12	763	Promoter (<=1kb)	446	169849631	169893896	44266	2	ENSG00000000457	ENST00000367771	0	57147	SCYL3	SCY1 like pseudokinase 3
17	61862832	61864156	1325	*	.	1000	20.5618	4582.18	4577.76	742	Promoter (<=1kb)	462	61679139	61863528	184390	2	ENSG00000136492	ENST00000259008	0	83990	BRIP1	BRCA1 interacting helicase 1
14	35045939	35047161	1223	*	.	1000	15.0906	4581.03	4576.62	396	Promoter (<=1kb)	459	35046272	35083378	37107	1	ENSG00000151327	ENST00000280987	0	283635	FAM177A1	family with sequence similarity 177 member A1
2	197498777	197500723	1947	*	.	1000	12.1725	4578.24	4573.82	1113	Promoter (<=1kb)	447	197500140	197503296	3157	1	ENSG00000115541	ENST00000409729	0	3336	HSPE1	heat shock protein family E (Hsp10) member 1
7	100100426	100102403	1978	*	.	1000	10.8991	4577.27	4572.85	1076	Promoter (<=1kb)	452	100092728	100101370	8643	2	ENSG00000166508	ENST00000489841	0	4176	MCM7	minichromosome maintenance complex component 7
16	30429544	30430738	1195	*	.	1000	19.0791	4575.97	4571.55	633	Promoter (<=1kb)	461	30423615	30430030	6416	2	ENSG00000179958	ENST00000319285	0	79077	DCTPP1	dCTP pyrophosphatase 1
19	33373013	33374363	1351	*	.	1000	15.5059	4575.02	4570.6	596	Promoter (<=1kb)	464	33373685	33382670	8986	1	ENSG00000153879	ENST00000652630	0	1054	CEBPG	CCAAT enhancer binding protein gamma
17	28710499	28711994	1496	*	.	1000	12.856	4575.01	4570.6	881	Promoter (<=1kb)	462	28703197	28711854	8658	2	ENSG00000167525	ENST00000301039	0	147011	PROCA1	protein interacting with cyclin A1
1	88992324	88993386	1063	*	.	1000	17.9831	4574.49	4570.08	680	Promoter (<=1kb)	446	88935773	88992776	57004	2	ENSG00000137944	ENST00000370491	0	56267	KYAT3	kynurenine aminotransferase 3
5	90408875	90410381	1507	*	.	1000	16.2138	4574.39	4569.97	920	Promoter (<=1kb)	450	90392257	90409756	17500	2	ENSG00000153140	ENST00000283122	0	1070	CETN3	centrin 3
1	244047525	244048780	1256	*	.	1000	16.5319	4574.23	4569.81	870	Promoter (<=1kb)	446	244047519	244048244	726	2	ENSG00000289055	ENST00000691433	0	NA	NA	NA
9	125706540	125707780	1241	*	.	1000	25.1266	4572.45	4568.04	707	Promoter (<=1kb)	454	125437393	125707231	269839	2	ENSG00000119487	ENST00000373511	0	79109	MAPKAP1	MAPK associated protein 1
2	32356428	32358422	1995	*	.	1000	13.1832	4571.83	4567.42	733	Promoter (<=1kb)	447	32357023	32618878	261856	1	ENSG00000115760	ENST00000421745	0	57448	BIRC6	baculoviral IAP repeat containing 6
8	63038427	63039713	1287	*	.	1000	17.1673	4570.47	4566.06	465	Promoter (<=1kb)	453	63014881	63038545	23665	2	ENSG00000137563	ENST00000518466	0	8836	GGH	gamma-glutamyl hydrolase
2	55692802	55694087	1286	*	.	1000	24.7565	4569	4564.58	1065	Promoter (<=1kb)	447	55634061	55693844	59784	2	ENSG00000138035	ENST00000447944	0	87178	PNPT1	polyribonucleotide nucleotidyltransferase 1
9	35657225	35659148	1924	*	.	1000	13.2064	4566.97	4562.55	730	Promoter (<=1kb)	454	35658290	35661499	3210	1	ENSG00000159884	ENST00000378409	0	203260	CCDC107	coiled-coil domain containing 107
17	75854943	75856605	1663	*	.	1000	13.4086	4566.56	4562.15	618	Promoter (<=1kb)	462	75845699	75855335	9637	2	ENSG00000132471	ENST00000254806	0	23558	WBP2	WW domain binding protein 2
10	119892236	119893438	1203	*	.	1000	19.8434	4565.72	4561.31	428	Promoter (<=1kb)	455	119892730	119944657	51928	1	ENSG00000107651	ENST00000369075	0	11196	SEC23IP	SEC23 interacting protein
3	170221898	170223540	1643	*	.	1000	15.9387	4565.63	4561.22	507	Promoter (<=1kb)	448	170222424	170305977	83554	1	ENSG00000163558	ENST00000295797	0	5584	PRKCI	protein kinase C iota
10	124791083	124792881	1799	*	.	1000	18.8102	4565.02	4560.61	817	Promoter (<=1kb)	455	124756254	124791887	35634	2	ENSG00000203791	ENST00000652548	0	399818	EEF1AKMT2	EEF1A lysine methyltransferase 2
2	10935588	10936809	1222	*	.	1000	17.8695	4564.61	4560.2	837	Distal Intergenic	447	10911934	10914225	2292	1	ENSG00000162975	ENST00000295082	23654	3754	KCNF1	potassium voltage-gated channel modifier subfamily F member 1
19	45770222	45771066	845	*	.	1000	7.52912	4564.36	4559.95	452	Promoter (<=1kb)	464	45770982	45772504	1523	1	ENSG00000267395	ENST00000586251	0	109729182	DM1-AS	DM1 locus antisense RNA
16	48365087	48366797	1711	*	.	1000	19.6158	4564.03	4559.62	878	Promoter (<=1kb)	461	48360531	48365901	5371	2	ENSG00000196470	ENST00000356721	0	6477	SIAH1	siah E3 ubiquitin protein ligase 1
9	35603823	35605343	1521	*	.	1000	13.1205	4563.95	4559.54	455	Promoter (<=1kb)	454	35605262	35610033	4772	1	ENSG00000107140	ENST00000336395	0	7016	TESK1	testis associated actin remodelling kinase 1
15	73632875	73633997	1123	*	.	1000	13.08	4563.2	4558.79	536	Promoter (<=1kb)	460	73560014	73633389	73376	2	ENSG00000156642	ENST00000345330	0	27020	NPTN	neuroplastin
19	39444794	39446213	1420	*	.	1000	15.4911	4562.56	4558.15	726	Promoter (<=1kb)	464	39445546	39476666	31121	1	ENSG00000196235	ENST00000402194	0	6829	SUPT5H	SPT5 homolog, DSIF elongation factor subunit
2	200962906	200964263	1358	*	.	1000	16.2264	4562.55	4558.14	828	Promoter (<=1kb)	447	200908977	200963660	54684	2	ENSG00000115942	ENST00000234296	0	4999	ORC2	origin recognition complex subunit 2
15	58748726	58750348	1623	*	.	1000	15.4494	4562.44	4558.03	1282	Promoter (<=1kb)	460	58588809	58749707	160899	2	ENSG00000137845	ENST00000260408	0	102	ADAM10	ADAM metallopeptidase domain 10
12	21656910	21658318	1409	*	.	1000	16.9746	4562.13	4557.73	1006	Promoter (<=1kb)	457	21635342	21657794	22453	2	ENSG00000111716	ENST00000396076	0	3945	LDHB	lactate dehydrogenase B
2	224585143	224586162	1020	*	.	1000	17.862	4558.63	4554.23	637	Promoter (<=1kb)	447	224470150	224585363	115214	2	ENSG00000036257	ENST00000264414	0	8452	CUL3	cullin 3
1	117121317	117122487	1171	*	.	1000	19.4852	4558.52	4554.11	480	Promoter (<=1kb)	446	117111060	117121749	10690	2	ENSG00000134253	ENST00000256649	0	80263	TRIM45	tripartite motif containing 45
X	16786044	16787328	1285	*	.	1000	19.3544	4558.07	4553.67	223	Promoter (<=1kb)	468	16786432	16844517	58086	1	ENSG00000086712	ENST00000398155	0	55787	TXLNG	taxilin gamma
17	72682672	72684873	2202	*	.	1000	12.9844	4555.84	4551.44	1466	Intron (ENST00000255559/ENSG00000133195, intron 7 of 9)	462	72663823	72664152	330	2	ENSG00000200783	ENST00000363913	-18520	NA	NA	NA
X	48801570	48802857	1288	*	.	1000	12.0704	4555.16	4550.75	469	Promoter (<=1kb)	468	48801700	48806706	5007	1	ENSG00000094631	ENST00000376643	0	10013	HDAC6	histone deacetylase 6
17	76071983	76073101	1119	*	.	1000	16.4233	4554.99	4550.58	574	Promoter (<=1kb)	462	76038785	76072517	33733	2	ENSG00000167881	ENST00000307877	0	6730	SRP68	signal recognition particle 68
12	2890204	2891648	1445	*	.	1000	14.8604	4552.53	4548.13	606	Promoter (<=1kb)	457	2890887	2939345	48459	1	ENSG00000078246	ENST00000544943	0	7289	TULP3	TUB like protein 3
2	213284113	213285116	1004	*	.	1000	20.1808	4551.69	4547.29	257	Promoter (<=1kb)	447	213284389	214410501	1126113	1	ENSG00000144451	ENST00000406979	0	79582	SPAG16	sperm associated antigen 16
15	75023277	75024420	1144	*	.	1000	20.422	4551.65	4547.24	268	Promoter (<=1kb)	460	75023586	75045168	21583	1	ENSG00000138621	ENST00000568207	0	60490	PPCDC	phosphopantothenoylcysteine decarboxylase
7	149194972	149196127	1156	*	.	1000	18.1142	4550.81	4546.41	511	Promoter (<=1kb)	452	149195546	149226238	30693	1	ENSG00000170265	ENST00000610704	0	8427	ZNF282	zinc finger protein 282
3	115146582	115148331	1750	*	.	1000	11.3408	4550.11	4545.7	1146	Promoter (<=1kb)	448	114314500	115147288	832789	2	ENSG00000181722	ENST00000675478	0	26137	ZBTB20	zinc finger and BTB domain containing 20
2	71129681	71131118	1438	*	.	1000	18.2066	4549.29	4544.89	902	Promoter (<=1kb)	447	71109687	71130229	20543	2	ENSG00000124370	ENST00000244217	0	84693	MCEE	methylmalonyl-CoA epimerase
5	138542514	138544018	1505	*	.	1000	11.353	4544.49	4540.08	907	Promoter (<=1kb)	450	138506095	138543229	37135	2	ENSG00000120705	ENST00000499810	0	2107	ETF1	eukaryotic translation termination factor 1
8	102528414	102529597	1184	*	.	1000	18.8665	4542.14	4537.74	388	Promoter (<=1kb)	453	102528740	102538668	9929	1	ENSG00000253633	ENST00000519630	0	107986898	LOC107986898	uncharacterized LOC107986898
10	100372908	100374406	1499	*	.	1000	11.4796	4540.96	4536.55	544	Promoter (<=1kb)	455	100373099	100383372	10274	1	ENSG00000235823	ENST00000668904	0	90271	OLMALINC	oligodendrocyte maturation-associated long intergenic non-coding RNA
8	143246330	143247716	1387	*	.	1000	16.7105	4539.54	4535.14	569	Promoter (<=1kb)	453	143246821	143253591	6771	1	ENSG00000181638	ENST00000520584	0	286128	ZFP41	ZFP41 zinc finger protein
14	24140556	24142164	1609	*	.	1000	12.1487	4538.73	4534.34	1072	Promoter (<=1kb)	459	24138965	24141570	2606	2	ENSG00000100908	ENST00000560403	0	51016	EMC9	ER membrane protein complex subunit 9
15	63156757	63158379	1623	*	.	1000	16.9008	4538.3	4533.9	742	Promoter (<=1kb)	460	63148249	63157477	9229	2	ENSG00000185088	ENST00000330964	0	51065	RPS27L	ribosomal protein S27 like
8	106269624	106271579	1956	*	.	1000	16.9929	4538.3	4533.9	607	Promoter (<=1kb)	453	106270144	106272899	2756	1	ENSG00000164830	ENST00000521369	0	55074	OXR1	oxidation resistance 1
3	123201426	123202826	1401	*	.	1000	23.6712	4538.01	4533.61	409	Promoter (<=1kb)	448	123201927	123243950	42024	1	ENSG00000121542	ENST00000477063	0	26984	SEC22A	SEC22 homolog A, vesicle trafficking protein
20	6122188	6123825	1638	*	.	1000	17.5946	4535.14	4530.75	882	Promoter (<=1kb)	465	6074845	6123030	48186	2	ENSG00000101311	ENST00000217289	0	55612	FERMT1	FERM domain containing kindlin 1
3	32684583	32685939	1357	*	.	1000	18.6643	4534.31	4529.91	614	Promoter (<=1kb)	448	32685145	32773714	88570	1	ENSG00000182973	ENST00000331889	0	25904	CNOT10	CCR4-NOT transcription complex subunit 10
5	149357445	149358679	1235	*	.	1000	21.8312	4531.11	4526.71	505	Promoter (<=1kb)	450	149358037	149365971	7935	1	ENSG00000145882	ENST00000510990	0	78991	PCYOX1L	prenylcysteine oxidase 1 like
15	64825041	64826320	1280	*	.	1000	19.5467	4528.35	4523.95	744	Promoter (<=1kb)	460	64815632	64825647	10016	2	ENSG00000140451	ENST00000559239	0	80119	PIF1	PIF1 5'-to-3' DNA helicase
3	31531794	31533187	1394	*	.	1000	11.5649	4527.74	4523.34	744	Promoter (<=1kb)	448	31532638	31620274	87637	1	ENSG00000163527	ENST00000453168	0	201595	STT3B	STT3 oligosaccharyltransferase complex catalytic subunit B
16	70288075	70289984	1910	*	.	1000	18.1806	4525.76	4521.37	1459	Promoter (<=1kb)	461	70251983	70289317	37335	2	ENSG00000090861	ENST00000675643	0	16	AARS1	alanyl-tRNA synthetase 1
12	57546197	57547572	1376	*	.	1000	17.1277	4523.99	4519.6	1054	Promoter (<=1kb)	457	57530051	57547192	17142	2	ENSG00000175203	ENST00000548249	0	10540	DCTN2	dynactin subunit 2
11	30322760	30323966	1207	*	.	1000	22.3633	4522.2	4517.8	317	Promoter (<=1kb)	456	30323104	30338223	15120	1	ENSG00000152219	ENST00000282032	0	120534	ARL14EP	ADP ribosylation factor like GTPase 14 effector protein
17	8138398	8139858	1461	*	.	1000	13.0776	4519.09	4514.7	674	Promoter (2-3kb)	462	8141216	8142191	976	2	ENSG00000179094	ENST00000583677	2333	5187	PER1	period circadian regulator 1
2	85353581	85355389	1809	*	.	1000	18.5981	4518.02	4513.62	984	Promoter (<=1kb)	447	85341955	85354528	12574	2	ENSG00000042445	ENST00000295802	0	54884	RETSAT	retinol saturase
17	28854269	28855372	1104	*	.	1000	22.3324	4513.81	4509.42	714	Promoter (<=1kb)	462	28855010	28858775	3766	1	ENSG00000132591	ENST00000412138	0	26284	ERAL1	Era like 12S mitochondrial rRNA chaperone 1
11	134252842	134254183	1342	*	.	1000	24.0476	4513.22	4508.83	641	Promoter (<=1kb)	456	134253548	134262958	9411	1	ENSG00000151498	ENST00000526026	0	27034	ACAD8	acyl-CoA dehydrogenase family member 8
16	15887945	15889103	1159	*	.	1000	20.9953	4512.61	4508.22	811	Promoter (<=1kb)	461	15865719	15888603	22885	2	ENSG00000133393	ENST00000255759	0	123811	CEP20	centrosomal protein 20
20	17568997	17571008	2012	*	.	1000	9.54695	4511.66	4507.27	911	Promoter (<=1kb)	465	17511992	17569220	57229	2	ENSG00000125864	ENST00000473415	0	631	BFSP1	beaded filament structural protein 1
11	66311657	66313317	1661	*	.	1000	11.8172	4511.06	4506.67	1301	Promoter (<=1kb)	456	66312853	66319237	6385	1	ENSG00000254458	ENST00000534065	0	NA	NA	NA
1	67684861	67686931	2071	*	.	1000	13.3313	4509.99	4505.61	314	Promoter (<=1kb)	446	67685201	67687986	2786	1	ENSG00000116717	ENST00000370985	0	1647	GADD45A	growth arrest and DNA damage inducible alpha
1	23343621	23345146	1526	*	.	1000	16.7176	4508.73	4504.34	871	Promoter (<=1kb)	446	23304688	23344284	39597	2	ENSG00000125944	ENST00000302271	0	10236	HNRNPR	heterogeneous nuclear ribonucleoprotein R
10	102244924	102245875	952	*	.	1000	12.8523	4507.67	4503.29	417	Promoter (<=1kb)	455	102245371	102382882	137512	1	ENSG00000107862	ENST00000676513	0	8729	GBF1	golgi brefeldin A resistant guanine nucleotide exchange factor 1
1	165768461	165769534	1074	*	.	1000	21.6618	4506.97	4502.58	476	Promoter (<=1kb)	446	165724293	165768922	44630	2	ENSG00000143183	ENST00000612311	0	54499	TMCO1	transmembrane and coiled-coil domains 1
12	68745483	68747230	1748	*	.	1000	18.0524	4506.04	4501.65	674	Promoter (<=1kb)	457	68746125	68767158	21034	1	ENSG00000175782	ENST00000674096	0	55508	SLC35E3	solute carrier family 35 member E3
7	141014192	141015568	1377	*	.	1000	21.1341	4504.3	4499.92	820	Promoter (<=1kb)	452	141002610	141014952	12343	2	ENSG00000090263	ENST00000324787	0	51650	MRPS33	mitochondrial ribosomal protein S33
2	37924808	37925880	1073	*	.	1000	18.1784	4503.42	4499.04	705	Promoter (<=1kb)	447	37925287	38017744	92458	1	ENSG00000115841	ENST00000354545	0	151393	RMDN2	regulator of microtubule dynamics 2
10	133393897	133395137	1241	*	.	1000	21.123	4502.32	4497.93	275	Promoter (<=1kb)	455	133394094	133420464	26371	1	ENSG00000148824	ENST00000477902	0	92170	MTG1	mitochondrial ribosome associated GTPase 1
7	149064793	149066282	1490	*	.	1000	16.7775	4498.86	4494.47	1145	Distal Intergenic	452	149053961	149054173	213	1	ENSG00000234565	ENST00000415962	10832	NA	NA	NA
1	44673852	44675005	1154	*	.	1000	15.6487	4498.28	4493.9	697	Promoter (<=1kb)	446	44635238	44674459	39222	2	ENSG00000126106	ENST00000372242	0	79639	TMEM53	transmembrane protein 53
14	23320645	23322449	1805	*	.	1000	14.6695	4497.82	4493.44	493	Promoter (<=1kb)	459	23321457	23326163	4707	1	ENSG00000100836	ENST00000216727	0	8106	PABPN1	poly(A) binding protein nuclear 1
10	73997422	73998497	1076	*	.	1000	13.5335	4497.43	4493.05	636	Promoter (<=1kb)	455	73998114	74118048	119935	1	ENSG00000035403	ENST00000624354	0	7414	VCL	vinculin
12	27523378	27524755	1378	*	.	1000	15.9104	4496.31	4491.93	770	Promoter (<=1kb)	457	27523431	27650052	126622	1	ENSG00000110841	ENST00000538433	0	8496	PPFIBP1	PPFIA binding protein 1
12	67268389	67270263	1875	*	.	1000	12.0477	4496.23	4491.85	450	Promoter (<=1kb)	457	67269358	67319953	50596	1	ENSG00000111530	ENST00000545606	0	55832	CAND1	cullin associated and neddylation dissociated 1
5	151757877	151759337	1461	*	.	1000	19.8308	4490.9	4486.52	782	Promoter (<=1kb)	450	151742822	151758631	15810	2	ENSG00000177556	ENST00000313115	0	475	ATOX1	antioxidant 1 copper chaperone
11	83285480	83286825	1346	*	.	1000	14.728	4487.48	4483.11	577	Promoter (<=1kb)	456	83259081	83286367	27287	2	ENSG00000137500	ENST00000529689	0	60492	CCDC90B	coiled-coil domain containing 90B
9	34328703	34329926	1224	*	.	1000	15.5672	4486.16	4481.78	819	Promoter (<=1kb)	454	34329506	34343711	14206	1	ENSG00000164978	ENST00000346365	0	318	NUDT2	nudix hydrolase 2
16	29943755	29945100	1346	*	.	1000	16.4471	4483.16	4478.78	389	Promoter (2-3kb)	461	29940885	29973050	32166	1	ENSG00000149932	ENST00000414689	2870	124446	TMEM219	transmembrane protein 219
X	47144295	47145903	1609	*	.	1000	18.0949	4481.52	4477.15	885	Promoter (<=1kb)	468	47142071	47145466	3396	2	ENSG00000147123	ENST00000687244	0	54539	NDUFB11	NADH:ubiquinone oxidoreductase subunit B11
15	90165324	90166584	1261	*	.	1000	16.4681	4479.58	4475.2	574	Promoter (<=1kb)	460	90166233	90166526	294	1	ENSG00000240470	ENST00000491561	0	106479350	RN7SL346P	RNA, 7SL, cytoplasmic 346, pseudogene
2	208265265	208266795	1531	*	.	1000	16.7796	4477.91	4473.54	756	Promoter (<=1kb)	447	208266255	208358746	92492	1	ENSG00000115020	ENST00000264380	0	200576	PIKFYVE	phosphoinositide kinase, FYVE-type zinc finger containing
17	68101043	68102675	1633	*	.	1000	20.1375	4474.96	4470.59	626	Promoter (<=1kb)	462	68101874	68161227	59354	1	ENSG00000237854	ENST00000690974	0	NA	NA	NA
12	89351532	89353146	1615	*	.	1000	9.13019	4473.06	4468.69	988	Promoter (<=1kb)	457	89347235	89352501	5267	2	ENSG00000139318	ENST00000279488	0	1848	DUSP6	dual specificity phosphatase 6
5	123511385	123512590	1206	*	.	1000	17.1468	4469.55	4465.18	644	Promoter (<=1kb)	450	123512099	123617040	104942	1	ENSG00000151292	ENST00000345990	0	1456	CSNK1G3	casein kinase 1 gamma 3
1	155227332	155228112	781	*	.	1000	15.2523	4468.27	4463.9	267	Promoter (<=1kb)	446	155213821	155227462	13642	2	ENSG00000160766	ENST00000693149	0	2630	GBAP1	glucosylceramidase beta pseudogene 1
1	182029198	182030383	1186	*	.	1000	17.1753	4466.64	4462.27	514	Distal Intergenic	446	182056304	182058010	1707	2	ENSG00000179930	ENST00000673963	27627	127665	ZNF648	zinc finger protein 648
17	63826441	63827942	1502	*	.	1000	12.2756	4466.07	4461.7	983	Promoter (<=1kb)	462	63827152	63830917	3766	1	ENSG00000087191	ENST00000579708	0	5705	PSMC5	proteasome 26S subunit, ATPase 5
17	78186371	78187656	1286	*	.	1000	12.6969	4464.71	4460.34	835	Promoter (<=1kb)	462	78174091	78187052	12962	2	ENSG00000167900	ENST00000301634	0	7083	TK1	thymidine kinase 1
19	38683112	38684773	1662	*	.	1000	7.27997	4462.66	4458.29	1459	Exon (ENST00000585999/ENSG00000267375, exon 2 of 2)	464	38683873	38693606	9734	2	ENSG00000267375	ENST00000585999	8833	NA	NA	NA
17	2511228	2512633	1406	*	.	1000	20.5602	4462.33	4457.96	700	Promoter (<=1kb)	462	2416049	2511888	95840	2	ENSG00000127804	ENST00000263092	0	79066	METTL16	methyltransferase like 16
2	85327498	85328577	1080	*	.	1000	18.6204	4456.17	4451.81	520	Promoter (<=1kb)	447	85318027	85327989	9963	2	ENSG00000152291	ENST00000377386	0	10618	TGOLN2	trans-golgi network protein 2
9	94165776	94167343	1568	*	.	1000	14.7279	4452.35	4447.99	304	Promoter (<=1kb)	454	94166258	94179563	13306	1	ENSG00000269929	ENST00000652769	0	112903833	MIRLET7A1HG	miRlet-7a-1/let-7f-1/let-7d cluster host gene
X	23742305	23743735	1431	*	.	1000	17.036	4451.08	4446.71	1047	Promoter (<=1kb)	468	23701055	23743276	42222	2	ENSG00000123130	ENST00000379303	0	23597	ACOT9	acyl-CoA thioesterase 9
3	50235581	50236458	878	*	.	1000	16.9057	4448	4443.64	371	Promoter (<=1kb)	448	50236204	50259354	23151	1	ENSG00000114353	ENST00000441156	0	2771	GNAI2	G protein subunit alpha i2
17	47323381	47325073	1693	*	.	1000	15.5338	4447.41	4443.05	480	Promoter (<=1kb)	462	47323528	47335276	11749	1	ENSG00000178852	ENST00000523285	0	124989	EFCAB13	EF-hand calcium binding domain 13
1	150696958	150697722	765	*	.	1000	24.9017	4446.25	4441.89	332	Promoter (<=1kb)	446	150646230	150697154	50925	2	ENSG00000143457	ENST00000271732	0	55204	GOLPH3L	golgi phosphoprotein 3 like
12	105107141	105108336	1196	*	.	1000	14.6824	4444.29	4439.93	581	Promoter (<=1kb)	457	105019806	105107643	87838	2	ENSG00000136010	ENST00000652515	0	160428	ALDH1L2	aldehyde dehydrogenase 1 family member L2
8	144136751	144138382	1632	*	.	1000	15.6505	4443.39	4439.03	929	Promoter (<=1kb)	453	144137774	144140851	3078	1	ENSG00000235173	ENST00000347708	0	51236	HGH1	HGH1 homolog
15	59371959	59373302	1344	*	.	1000	13.8807	4442.06	4437.7	977	Promoter (<=1kb)	460	59372693	59492302	119610	1	ENSG00000157470	ENST00000558348	0	145773	FAM81A	family with sequence similarity 81 member A
15	66801842	66804066	2225	*	.	1000	19.6039	4440.37	4436.02	1490	Distal Intergenic	460	66808404	66810560	2157	1	ENSG00000270490	ENST00000604293	-4338	390597	LETM1P1	leucine zipper and EF-hand containing transmembrane protein 1 pseudogene 1
11	86301675	86302812	1138	*	.	1000	23.8201	4439.89	4435.54	508	Promoter (<=1kb)	456	86302211	86345638	43428	1	ENSG00000149196	ENST00000533986	0	51501	HIKESHI	heat shock protein nuclear import factor hikeshi
8	65633764	65634708	945	*	.	1000	19.0785	4437.72	4433.36	490	Promoter (<=1kb)	453	65602458	65634177	31720	2	ENSG00000104442	ENST00000276569	0	55156	ARMC1	armadillo repeat containing 1
19	48992266	48994117	1852	*	.	1000	12.6181	4434.88	4430.53	1214	Promoter (<=1kb)	464	48968130	48993309	25180	2	ENSG00000104812	ENST00000323798	0	2997	GYS1	glycogen synthase 1
20	25696123	25697198	1076	*	.	1000	17.5733	4434.72	4430.36	822	Promoter (<=1kb)	465	25673195	25696853	23659	2	ENSG00000130684	ENST00000252979	0	26152	ZNF337	zinc finger protein 337
1	180631621	180632892	1272	*	.	1000	16.6593	4434.11	4429.76	279	Promoter (<=1kb)	446	180632022	180890279	258258	1	ENSG00000143324	ENST00000367590	0	9213	XPR1	xenotropic and polytropic retrovirus receptor 1
2	67397089	67398631	1543	*	.	1000	18.0593	4434.08	4429.72	176	Promoter (<=1kb)	447	67397322	67412089	14768	1	ENSG00000143971	ENST00000645739	0	54465	ETAA1	ETAA1 activator of ATR kinase
15	52287778	52289102	1325	*	.	1000	15.8409	4433.89	4429.53	732	Intron (ENST00000261839/ENSG00000128833, intron 1 of 40)	460	52192659	52295656	102998	2	ENSG00000128833	ENST00000560809	6554	55930	MYO5C	myosin VC
19	44164476	44165433	958	*	.	1000	19.8948	4433.84	4429.49	510	Promoter (<=1kb)	464	44165073	44175643	10571	1	ENSG00000167380	ENST00000590578	0	7769	ZNF226	zinc finger protein 226
21	33541951	33543636	1686	*	.	1000	16.5247	4433.06	4428.71	973	Promoter (<=1kb)	466	33503931	33542842	38912	2	ENSG00000159131	ENST00000381831	0	2618	GART	phosphoribosylglycinamide formyltransferase, phosphoribosylglycinamide synthetase, phosphoribosylaminoimidazole synthetase
2	55518926	55520694	1769	*	.	1000	15.6403	4430.86	4426.51	678	Promoter (<=1kb)	447	55519604	55545079	25476	1	ENSG00000163001	ENST00000339012	0	112942	CFAP36	cilia and flagella associated protein 36
2	130797337	130798508	1172	*	.	1000	15.2479	4429.5	4425.15	301	Distal Intergenic	447	130776646	130776957	312	1	ENSG00000232503	ENST00000455007	20691	NA	NA	NA
2	158967551	158970307	2757	*	.	1000	13.6908	4427.79	4423.44	1041	Promoter (<=1kb)	447	158968640	159232659	264020	1	ENSG00000115183	ENST00000263635	0	85461	TANC1	tetratricopeptide repeat, ankyrin repeat and coiled-coil containing 1
5	148383476	148384747	1272	*	.	1000	22.3759	4427.04	4422.68	437	Promoter (<=1kb)	450	148383935	148442827	58893	1	ENSG00000145868	ENST00000296701	0	81545	FBXO38	F-box protein 38
5	176360921	176362358	1438	*	.	1000	19.8365	4425.13	4420.78	890	Promoter (<=1kb)	450	176346062	176361739	15678	2	ENSG00000122203	ENST00000393728	0	57179	KIAA1191	KIAA1191
7	135170127	135171138	1012	*	.	1000	13.8539	4424.09	4419.74	640	Promoter (<=1kb)	452	135092363	135170695	78333	2	ENSG00000122783	ENST00000459937	0	78996	CYREN	cell cycle regulator of NHEJ
1	109425816	109426983	1168	*	.	1000	20.3953	4423.38	4419.03	694	Promoter (<=1kb)	446	109399042	109426448	27407	2	ENSG00000143106	ENST00000271308	0	5686	PSMA5	proteasome 20S subunit alpha 5
17	43900056	43901327	1272	*	.	1000	19.3147	4422.55	4418.2	636	Promoter (<=1kb)	462	43875357	43900598	25242	2	ENSG00000108852	ENST00000377184	0	4355	MPP2	membrane palmitoylated protein 2
8	125429122	125431046	1925	*	.	1000	7.95868	4421.78	4417.43	1203	Promoter (<=1kb)	453	125430358	125438403	8046	1	ENSG00000173334	ENST00000311922	0	10221	TRIB1	tribbles pseudokinase 1
3	158671963	158673092	1130	*	.	1000	22.4001	4421.68	4417.33	743	Promoter (<=1kb)	448	158666414	158672648	6235	2	ENSG00000079257	ENST00000264265	0	56925	LXN	latexin
2	61065263	61066737	1475	*	.	1000	16.8673	4419.21	4414.86	549	Promoter (<=1kb)	447	61065871	61089670	23800	1	ENSG00000162929	ENST00000482513	0	84542	SANBR	SANT and BTB domain regulator of CSR
8	66612384	66614236	1853	*	.	1000	13.4834	4419.09	4414.74	1093	Promoter (<=1kb)	453	66562175	66613218	51044	2	ENSG00000185697	ENST00000522677	0	4603	MYBL1	MYB proto-oncogene like 1
5	126776450	126777224	775	*	.	1000	10.8981	4418.21	4413.86	415	Promoter (<=1kb)	450	126776623	126837014	60392	1	ENSG00000113368	ENST00000460265	0	4001	LMNB1	lamin B1
2	70899838	70902315	2478	*	.	1000	12.7015	4417.78	4413.43	714	Promoter (<=1kb)	447	70900576	70933446	32871	1	ENSG00000116035	ENST00000234392	0	25806	VAX2	ventral anterior homeobox 2
2	36965736	36967321	1586	*	.	1000	15.0534	4417.57	4413.23	962	Promoter (<=1kb)	447	36837698	36966536	128839	2	ENSG00000115808	ENST00000263918	0	6801	STRN	striatin
9	128723485	128725277	1793	*	.	1000	14.2923	4417.55	4413.2	730	Promoter (<=1kb)	454	128720870	128724123	3254	2	ENSG00000160446	ENST00000372667	0	84885	ZDHHC12	zinc finger DHHC-type palmitoyltransferase 12
17	81682770	81684553	1784	*	.	1000	14.8382	4417.11	4412.77	1081	Promoter (<=1kb)	462	81683326	81702116	18791	1	ENSG00000185359	ENST00000677161	0	9146	HGS	hepatocyte growth factor-regulated tyrosine kinase substrate
15	59688443	59689671	1229	*	.	1000	13.7825	4416.04	4411.69	1069	Promoter (<=1kb)	460	59659146	59689320	30175	2	ENSG00000140299	ENST00000607373	0	663	BNIP2	BCL2 interacting protein 2
20	5949682	5951251	1570	*	.	1000	20.7818	4414.7	4410.36	870	Promoter (<=1kb)	465	5937228	5950533	13306	2	ENSG00000089195	ENST00000203001	0	51605	TRMT6	tRNA methyltransferase 6
1	170531544	170532724	1181	*	.	1000	20.8894	4413.37	4409.03	555	Promoter (<=1kb)	446	170531819	170542523	10705	1	ENSG00000120370	ENST00000685976	0	92344	GORAB	golgin, RAB6 interacting
11	10857300	10858944	1645	*	.	1000	14.4672	4411.69	4407.35	866	Promoter (<=1kb)	456	10849897	10858073	8177	2	ENSG00000236287	ENST00000533925	0	58486	ZBED5	zinc finger BED-type containing 5
2	232549899	232551409	1511	*	.	1000	17.5982	4408.54	4404.2	726	Promoter (<=1kb)	447	232550659	232583616	32958	1	ENSG00000135930	ENST00000687222	0	9470	EIF4E2	eukaryotic translation initiation factor 4E family member 2
12	128823103	128824979	1877	*	.	1000	19.0046	4405.26	4400.92	945	Promoter (<=1kb)	457	128793194	128823958	30765	2	ENSG00000139370	ENST00000266771	0	121260	SLC15A4	solute carrier family 15 member 4
2	55616539	55618047	1509	*	.	1000	11.505	4403.43	4399.09	1146	Promoter (<=1kb)	447	55617909	55618373	465	1	ENSG00000272606	ENST00000608113	0	NA	NA	NA
10	68900579	68901963	1385	*	.	1000	16.5117	4402.96	4398.62	606	Promoter (<=1kb)	455	68901286	68913506	12221	1	ENSG00000107625	ENST00000483593	0	79009	DDX50	DExD-box helicase 50
19	44356020	44357252	1233	*	.	1000	28.6043	4402.09	4397.75	705	Promoter (<=1kb)	464	44326555	44356680	30126	2	ENSG00000062370	ENST00000354340	0	7771	ZNF112	zinc finger protein 112
2	73385348	73386786	1439	*	.	1000	13.0075	4402.04	4397.7	915	Promoter (<=1kb)	447	73385758	73609715	223958	1	ENSG00000116127	ENST00000484298	0	7840	ALMS1	ALMS1 centrosome and basal body associated protein
19	41859326	41860509	1184	*	.	1000	11.5776	4396.64	4392.3	313	Promoter (<=1kb)	464	41860255	41861606	1352	1	ENSG00000105372	ENST00000598466	0	6223	RPS19	ribosomal protein S19
17	80454257	80455519	1263	*	.	1000	13.6859	4396.1	4391.76	536	Promoter (<=1kb)	462	80453735	80454729	995	2	ENSG00000260369	ENST00000562672	0	NA	NA	NA
15	92881778	92882948	1171	*	.	1000	13.5725	4395.74	4391.41	685	Promoter (<=1kb)	460	92882707	92899701	16995	1	ENSG00000272888	ENST00000557682	0	NA	NA	NA
1	162560710	162562558	1849	*	.	1000	16.3923	4391.69	4387.35	690	Promoter (<=1kb)	446	162561506	162599842	38337	1	ENSG00000117143	ENST00000271469	0	6675	UAP1	UDP-N-acetylglucosamine pyrophosphorylase 1
19	40433321	40434562	1242	*	.	1000	13.3072	4390.57	4386.24	712	Distal Intergenic	464	40440847	40441385	539	2	ENSG00000167565	ENST00000601217	6823	29946	SERTAD3	SERTA domain containing 3
19	24033232	24034399	1168	*	.	1000	18.8486	4386.29	4381.95	180	Promoter (<=1kb)	464	24033405	24129961	96557	1	ENSG00000213096	ENST00000613065	0	9534	ZNF254	zinc finger protein 254
15	40806761	40807982	1222	*	.	1000	18.5102	4386.11	4381.78	788	Promoter (<=1kb)	460	40765161	40807473	42313	2	ENSG00000104129	ENST00000220496	0	55192	DNAJC17	DnaJ heat shock protein family (Hsp40) member C17
3	160564910	160566414	1505	*	.	1000	13.9022	4385.87	4381.53	733	Promoter (<=1kb)	448	160495007	160565571	70565	2	ENSG00000186432	ENST00000334256	0	3840	KPNA4	karyopherin subunit alpha 4
11	57740840	57742134	1295	*	.	1000	16.6576	4385.09	4380.76	553	Promoter (<=1kb)	456	57741491	57743550	2060	1	ENSG00000211450	ENST00000534355	0	280636	SELENOH	selenoprotein H
16	89490454	89491305	852	*	.	1000	14.7691	4380.98	4376.65	331	Promoter (<=1kb)	461	89267630	89490561	222932	2	ENSG00000167522	ENST00000301030	0	29123	ANKRD11	ankyrin repeat domain 11
11	63974149	63975164	1016	*	.	1000	16.6507	4380.92	4376.58	260	Promoter (<=1kb)	456	63974620	63976543	1924	1	ENSG00000176340	ENST00000314133	0	1351	COX8A	cytochrome c oxidase subunit 8A
X	3814362	3816381	2020	*	.	1000	13.6282	4380.79	4376.45	698	Distal Intergenic	468	3819924	3823898	3975	1	ENSG00000286431	ENST00000660920	-3543	NA	NA	NA
7	107890614	107891898	1285	*	.	1000	18.1626	4380.14	4375.81	509	Promoter (<=1kb)	452	107891162	107893554	2393	1	ENSG00000091140	ENST00000485066	0	1738	DLD	dihydrolipoamide dehydrogenase
9	133030000	133031263	1264	*	.	1000	17.8021	4379.67	4375.34	583	Promoter (<=1kb)	454	133030675	133058501	27827	1	ENSG00000148308	ENST00000372099	0	9328	GTF3C5	general transcription factor IIIC subunit 5
5	137753745	137755351	1607	*	.	1000	12.9415	4379.49	4375.16	1023	Promoter (<=1kb)	450	137745651	137754363	8713	2	ENSG00000177733	ENST00000314940	0	10949	HNRNPA0	heterogeneous nuclear ribonucleoprotein A0
16	84504015	84505350	1336	*	.	1000	12.5654	4378.11	4373.78	762	Promoter (<=1kb)	461	84476355	84504659	28305	2	ENSG00000140950	ENST00000343629	0	57707	MEAK7	MTOR associated protein, eak-7 homolog
15	59657024	59658091	1068	*	.	1000	21.0112	4376.93	4372.6	560	Promoter (<=1kb)	460	59638062	59657515	19454	2	ENSG00000140307	ENST00000396060	0	2958	GTF2A2	general transcription factor IIA subunit 2
6	159761760	159762947	1188	*	.	1000	17.0644	4374.08	4369.75	623	Promoter (<=1kb)	451	159679119	159762529	83411	2	ENSG00000112096	ENST00000546087	0	6648	SOD2	superoxide dismutase 2
7	48035121	48036508	1388	*	.	1000	20.5488	4373.02	4368.69	304	Promoter (<=1kb)	452	48035511	48061253	25743	1	ENSG00000164746	ENST00000420324	0	136288	C7orf57	chromosome 7 open reading frame 57
8	144798345	144799571	1227	*	.	1000	17.4044	4369.64	4365.31	552	Promoter (<=1kb)	453	144798876	144810076	11201	1	ENSG00000197363	ENST00000533965	0	340385	ZNF517	zinc finger protein 517
7	75738204	75739940	1737	*	.	1000	12.2516	4367.96	4363.64	983	Promoter (<=1kb)	452	75533298	75738941	205644	2	ENSG00000127946	ENST00000336926	0	3092	HIP1	huntingtin interacting protein 1
8	94553019	94554534	1516	*	.	1000	22.1032	4367.56	4363.23	524	Promoter (<=1kb)	453	94487689	94553469	65781	2	ENSG00000164944	ENST00000297591	0	25962	VIRMA	vir like m6A methyltransferase associated
14	73886290	73887483	1194	*	.	1000	18.8773	4366.98	4362.65	439	Promoter (<=1kb)	459	73886617	73931597	44981	1	ENSG00000119725	ENST00000540593	0	57862	ZNF410	zinc finger protein 410
11	8963900	8965348	1449	*	.	1000	11.9574	4364.34	4360.01	595	Promoter (<=1kb)	456	8947202	8964442	17241	2	ENSG00000175348	ENST00000534025	0	56674	TMEM9B	TMEM9 domain family member B
11	64778227	64779283	1057	*	.	1000	14.0348	4363.93	4359.61	555	Promoter (<=1kb)	456	64764606	64778469	13864	2	ENSG00000168066	ENST00000377387	0	7536	SF1	splicing factor 1
X	54639241	54640153	913	*	.	1000	20.3668	4363.19	4358.86	669	Distal Intergenic	468	54671985	54672638	654	1	ENSG00000215197	ENST00000426407	-31832	NA	NA	NA
20	20016821	20018170	1350	*	.	1000	18.7924	4360.2	4355.87	425	Promoter (<=1kb)	465	20017310	20033629	16320	1	ENSG00000173418	ENST00000310450	0	51126	NAA20	N-alpha-acetyltransferase 20, NatB catalytic subunit
1	47313427	47314597	1171	*	.	1000	17.8068	4360.06	4355.74	829	Promoter (<=1kb)	446	47250139	47314147	64009	2	ENSG00000123473	ENST00000360380	0	6491	STIL	STIL centriolar assembly protein
5	176447191	176449045	1855	*	.	1000	15.713	4359.36	4355.04	922	Promoter (<=1kb)	450	176447628	176486427	38800	1	ENSG00000113194	ENST00000510730	0	23197	FAF2	Fas associated factor family member 2
19	24086897	24087964	1068	*	.	1000	22.5589	4356.75	4352.43	229	Promoter (<=1kb)	464	24087160	24129961	42802	1	ENSG00000213096	ENST00000611359	0	9534	ZNF254	zinc finger protein 254
12	21437453	21438489	1037	*	.	1000	19.0681	4356.64	4352.32	349	Promoter (<=1kb)	457	21437615	21462746	25132	1	ENSG00000121350	ENST00000543476	0	79912	PYROXD1	pyridine nucleotide-disulphide oxidoreductase domain 1
20	542956	544400	1445	*	.	1000	20.2486	4355.04	4350.71	811	Promoter (<=1kb)	465	472498	543790	71293	2	ENSG00000101266	ENST00000217244	0	1457	CSNK2A1	casein kinase 2 alpha 1
12	110047824	110049158	1335	*	.	1000	20.2788	4354.46	4350.14	733	Promoter (<=1kb)	457	110027028	110048555	21528	2	ENSG00000174456	ENST00000546651	0	400073	C12orf76	chromosome 12 open reading frame 76
12	123383390	123384998	1609	*	.	1000	11.5281	4354.16	4349.84	702	Promoter (<=1kb)	457	123384132	123409353	25222	1	ENSG00000183955	ENST00000402868	0	387893	KMT5A	lysine methyltransferase 5A
19	38315346	38316617	1272	*	.	1000	12.0106	4353.89	4349.56	813	Promoter (<=1kb)	464	38303558	38315947	12390	2	ENSG00000167645	ENST00000339413	0	90522	YIF1B	Yip1 interacting factor homolog B, membrane trafficking protein
5	103119631	103121156	1526	*	.	1000	17.0347	4352.2	4347.88	628	Promoter (<=1kb)	450	103086000	103120108	34109	2	ENSG00000145723	ENST00000512248	0	54826	GIN1	gypsy retrotransposon integrase 1
5	143594868	143596670	1803	*	.	1000	13.1441	4350.43	4346.11	534	Intron (ENST00000661617/ENSG00000251205, intron 4 of 4)	450	143605628	143828772	223145	1	ENSG00000249881	ENST00000503323	-8958	NA	NA	NA
15	75903341	75904691	1351	*	.	1000	17.3171	4349.67	4345.36	529	Promoter (<=1kb)	460	75903876	75930847	26972	1	ENSG00000167196	ENST00000569749	0	26263	FBXO22	F-box protein 22
9	125240638	125242193	1556	*	.	1000	13.4205	4348.88	4344.56	756	Promoter (<=1kb)	454	125234853	125241343	6491	2	ENSG00000044574	ENST00000324460	0	3309	HSPA5	heat shock protein family A (Hsp70) member 5
17	40317768	40318449	682	*	.	1000	9.04937	4348.74	4344.42	402	Promoter (<=1kb)	462	40318281	40356331	38051	1	ENSG00000131759	ENST00000394089	0	5914	RARA	retinoic acid receptor alpha
7	47786278	47787541	1264	*	.	1000	15.3247	4346.82	4342.5	511	Exon (ENST00000690269/ENSG00000158683, exon 57 of 58)	452	47795291	47819830	24540	1	ENSG00000136275	ENST00000623971	-7750	80099	PKD1L1-AS1	PKD1L1 antisense RNA 1
5	134411423	134412672	1250	*	.	1000	20.4322	4345.42	4341.11	532	Promoter (<=1kb)	450	134402065	134411881	9817	2	ENSG00000237190	ENST00000458198	0	91368	CDKN2AIPNL	CDKN2A interacting protein N-terminal like
1	181021948	181023501	1554	*	.	1000	17.2229	4345.4	4341.08	957	Promoter (<=1kb)	446	180972712	181023121	50410	2	ENSG00000135823	ENST00000542060	0	10228	STX6	syntaxin 6
1	54052334	54054085	1752	*	.	1000	16.9665	4344.33	4340.01	1100	Promoter (<=1kb)	446	54053584	54112504	58921	1	ENSG00000116205	ENST00000648983	0	127428	TCEANC2	transcription elongation factor A N-terminal and central domain containing 2
3	53269584	53270853	1270	*	.	1000	15.404	4343.68	4339.36	553	Distal Intergenic	448	53241895	53256052	14158	2	ENSG00000163931	ENST00000483706	-13532	7086	TKT	transketolase
10	100346364	100347673	1310	*	.	1000	12.195	4341.82	4337.5	699	Promoter (<=1kb)	455	100347233	100364826	17594	1	ENSG00000099194	ENST00000370355	0	6319	SCD	stearoyl-CoA desaturase
15	85794008	85795409	1402	*	.	1000	17.1813	4341.02	4336.71	966	Promoter (<=1kb)	460	85759326	85794925	35600	2	ENSG00000183655	ENST00000337975	0	64410	KLHL25	kelch like family member 25
11	67507725	67508882	1158	*	.	1000	8.72697	4340.04	4335.73	513	Promoter (<=1kb)	456	67506497	67508162	1666	2	ENSG00000167797	ENST00000301488	0	10263	CDK2AP2	cyclin dependent kinase 2 associated protein 2
2	25877408	25879005	1598	*	.	1000	12.2584	4339.72	4335.4	1075	Promoter (<=1kb)	447	25733753	25878487	144735	2	ENSG00000143970	ENST00000435504	0	55252	ASXL2	ASXL transcriptional regulator 2
17	42016966	42018180	1215	*	.	1000	13.4008	4338.81	4334.49	525	Promoter (<=1kb)	462	42017020	42025644	8625	1	ENSG00000168256	ENST00000307641	0	28511	NKIRAS2	NFKB inhibitor interacting Ras like 2
11	66545641	66546748	1108	*	.	1000	16.3475	4338.06	4333.74	479	Promoter (<=1kb)	456	66520637	66546036	25400	2	ENSG00000174165	ENST00000534073	0	254359	ZDHHC24	zinc finger DHHC-type containing 24
17	1829155	1830816	1662	*	.	1000	21.8551	4337.2	4332.88	749	Promoter (<=1kb)	462	1829702	1872483	42782	1	ENSG00000132383	ENST00000571058	0	6117	RPA1	replication protein A1
11	44564644	44565928	1285	*	.	1000	15.5405	4336.13	4331.82	707	Promoter (<=1kb)	456	44565601	44619126	53526	1	ENSG00000085117	ENST00000342935	0	3732	CD82	CD82 molecule
10	56360751	56362086	1336	*	.	1000	22.7927	4334.26	4329.94	577	Promoter (<=1kb)	455	56357227	56361259	4033	2	ENSG00000122952	ENST00000373944	0	11130	ZWINT	ZW10 interacting kinetochore protein
17	45489975	45491578	1604	*	.	1000	14.7324	4333.97	4329.65	839	Promoter (<=1kb)	462	45435900	45490721	54822	2	ENSG00000225190	ENST00000430334	0	9842	PLEKHM1	pleckstrin homology and RUN domain containing M1
5	10441039	10442478	1440	*	.	1000	15.6921	4333.48	4329.16	800	Promoter (<=1kb)	450	10441524	10465024	23501	1	ENSG00000145491	ENST00000503804	0	83853	ROPN1L	rhophilin associated tail protein 1 like
5	175967583	175968844	1262	*	.	1000	24.1889	4332.16	4327.85	695	Promoter (<=1kb)	450	175959531	175968315	8785	2	ENSG00000051596	ENST00000265097	0	84321	THOC3	THO complex 3
20	20712321	20713562	1242	*	.	1000	21.1614	4331.89	4327.58	608	Promoter (<=1kb)	465	20389530	20712644	323115	2	ENSG00000188559	ENST00000202677	0	57186	RALGAPA2	Ral GTPase activating protein catalytic subunit alpha 2
6	79536458	79537974	1517	*	.	1000	19.9992	4330.94	4326.63	1017	Promoter (<=1kb)	451	79484991	79537430	52440	2	ENSG00000135338	ENST00000369846	0	167691	LCA5	lebercilin LCA5
5	140718310	140719489	1180	*	.	1000	17.197	4325.64	4321.33	722	Promoter (<=1kb)	450	140718925	140719013	89	1	ENSG00000202111	ENST00000365241	0	56663	VTRNA1-2	vault RNA 1-2
9	6680750	6682270	1521	*	.	1000	14.1954	4325.02	4320.71	583	Intron (ENST00000687289/ENSG00000236924, intron 2 of 2)	454	6675284	6675614	331	1	ENSG00000232946	ENST00000427308	5466	NA	NA	NA
10	79444525	79446418	1894	*	.	1000	14.3352	4323.83	4319.53	1376	Promoter (<=1kb)	455	79382325	79445624	63300	2	ENSG00000165424	ENST00000372336	0	219654	ZCCHC24	zinc finger CCHC-type containing 24
1	23367760	23368628	869	*	.	1000	14.0618	4323.81	4319.51	686	Promoter (<=1kb)	446	23359975	23368386	8412	2	ENSG00000125945	ENST00000374608	0	80818	ZNF436	zinc finger protein 436
19	48618859	48619864	1006	*	.	1000	9.76155	4323.44	4319.13	503	Promoter (<=1kb)	464	48619291	48630406	11116	1	ENSG00000063176	ENST00000340932	0	56848	SPHK2	sphingosine kinase 2
3	101778823	101779986	1164	*	.	1000	15.9219	4319.89	4315.58	629	Promoter (<=1kb)	448	101779202	101785606	6405	1	ENSG00000144815	ENST00000495842	0	91775	NXPE3	neurexophilin and PC-esterase domain family member 3
5	179731904	179733650	1747	*	.	1000	15.5178	4317.94	4313.64	836	Promoter (<=1kb)	450	179732822	179777283	44462	1	ENSG00000161021	ENST00000292599	0	9794	MAML1	mastermind like transcriptional coactivator 1
16	23557018	23558184	1167	*	.	1000	17.1281	4312.9	4308.6	640	Promoter (<=1kb)	461	23557721	23574387	16667	1	ENSG00000103353	ENST00000567212	0	56061	UBFD1	ubiquitin family domain containing 1
1	207320848	207322485	1638	*	.	1000	15.5209	4312.1	4307.8	653	Promoter (<=1kb)	446	207321532	207340766	19235	1	ENSG00000196352	ENST00000367063	0	1604	CD55	CD55 molecule (Cromer blood group)
5	173887235	173888607	1373	*	.	1000	16.1397	4309.96	4305.66	940	Promoter (<=1kb)	450	173888349	173961980	73632	1	ENSG00000113742	ENST00000265085	0	80315	CPEB4	cytoplasmic polyadenylation element binding protein 4
2	231514042	231515261	1220	*	.	1000	21.2588	4309.87	4305.57	377	Promoter (<=1kb)	447	231508420	231514385	5966	2	ENSG00000181798	ENST00000668648	0	151477	LINC00471	long intergenic non-protein coding RNA 471
19	40403295	40404720	1426	*	.	1000	12.678	4309.77	4305.47	1024	Promoter (<=1kb)	464	40393766	40404288	10523	2	ENSG00000105227	ENST00000673881	0	57716	PRX	periaxin
X	15334928	15335935	1008	*	.	1000	18.5588	4309.29	4304.99	655	Promoter (<=1kb)	468	15319455	15335429	15975	2	ENSG00000165195	ENST00000542278	0	5277	PIGA	phosphatidylinositol glycan anchor biosynthesis class A
2	33598502	33600031	1530	*	.	1000	14.7605	4308.55	4304.25	984	Promoter (<=1kb)	447	33552522	33599347	46826	2	ENSG00000119812	ENST00000437680	0	25940	FAM98A	family with sequence similarity 98 member A
16	69338883	69340209	1327	*	.	1000	19.559	4308.11	4303.81	812	Promoter (<=1kb)	461	69339568	69340887	1320	1	ENSG00000132603	ENST00000569637	0	51388	NIP7	nucleolar pre-rRNA processing protein NIP7
3	16264219	16265529	1311	*	.	1000	18.9147	4307.05	4302.75	916	Promoter (<=1kb)	448	16257061	16264943	7883	2	ENSG00000154813	ENST00000488423	0	285381	DPH3	diphthamide biosynthesis 3
11	57666821	57668712	1892	*	.	1000	12.6166	4306.28	4301.98	1095	Promoter (<=1kb)	456	57667747	57700363	32617	1	ENSG00000156599	ENST00000527985	0	25921	ZDHHC5	zinc finger DHHC-type palmitoyltransferase 5
5	140690633	140691958	1326	*	.	1000	18.4529	4302.6	4298.3	801	Promoter (<=1kb)	450	140691430	140698772	7343	1	ENSG00000112855	ENST00000520095	0	23438	HARS2	histidyl-tRNA synthetase 2, mitochondrial
20	13994978	13996523	1546	*	.	1000	18.7468	4301.71	4297.41	465	Promoter (<=1kb)	465	13849403	13995333	145931	2	ENSG00000101251	ENST00000486903	0	80343	SEL1L2	SEL1L2 adaptor subunit of ERAD E3 ligase
2	48440144	48441693	1550	*	.	1000	16.2796	4300.78	4296.48	532	Promoter (<=1kb)	447	48440598	48511468	70871	1	ENSG00000162869	ENST00000431614	0	129285	PPP1R21	protein phosphatase 1 regulatory subunit 21
1	165597915	165598772	858	*	.	1000	20.1048	4299.69	4295.4	369	Promoter (<=1kb)	446	165598356	165623679	25324	1	ENSG00000236206	ENST00000669787	0	NA	NA	NA
12	54324460	54325489	1030	*	.	1000	16.0663	4297.56	4293.26	575	Promoter (<=1kb)	457	54325109	54342630	17522	1	ENSG00000111481	ENST00000553009	0	22818	COPZ1	COPI coat complex subunit zeta 1
2	127064132	127065518	1387	*	.	1000	14.2062	4296.1	4291.8	745	Promoter (<=1kb)	447	127050382	127064928	14547	2	ENSG00000136717	ENST00000466111	0	274	BIN1	bridging integrator 1
8	129939081	129940544	1464	*	.	1000	14.3767	4292.88	4288.59	727	Promoter (<=1kb)	453	129839593	129939832	100240	2	ENSG00000153310	ENST00000519824	0	51571	CYRIB	CYFIP related Rac1 interactor B
2	55048963	55051025	2063	*	.	1000	8.69428	4291.61	4287.32	1647	Promoter (<=1kb)	447	54972189	55049198	77010	2	ENSG00000115310	ENST00000357376	0	57142	RTN4	reticulon 4
2	169693890	169694909	1020	*	.	1000	20.0831	4291.31	4287.02	606	Promoter (<=1kb)	447	169694454	169701706	7253	1	ENSG00000144362	ENST00000616481	0	493911	PHOSPHO2	phosphatase, orphan 2
11	106076824	106078397	1574	*	.	1000	16.4763	4290.6	4286.3	556	Promoter (<=1kb)	456	106077658	106097298	19641	1	ENSG00000149313	ENST00000525660	0	60496	AASDHPPT	aminoadipate-semialdehyde dehydrogenase-phosphopantetheinyl transferase
3	126703297	126704853	1557	*	.	1000	24.176	4289.58	4285.28	783	Promoter (<=1kb)	448	126704240	126957833	253594	1	ENSG00000159685	ENST00000503119	0	84303	CHCHD6	coiled-coil-helix-coiled-coil-helix domain containing 6
19	44400992	44401808	817	*	.	1000	23.8627	4289.47	4285.17	524	Promoter (<=1kb)	464	44329695	44401608	71914	2	ENSG00000267173	ENST00000588212	0	NA	NA	NA
16	27549272	27550511	1240	*	.	1000	20.116	4289.23	4284.93	840	Promoter (<=1kb)	461	27550133	27574295	24163	1	ENSG00000047578	ENST00000566023	0	23247	KATNIP	katanin interacting protein
17	50559802	50561006	1205	*	.	1000	10.2917	4287.63	4283.34	746	Promoter (<=1kb)	462	50560715	50627474	66760	1	ENSG00000006283	ENST00000359106	0	8913	CACNA1G	calcium voltage-gated channel subunit alpha1 G
12	1795699	1797043	1345	*	.	1000	16.7123	4287.2	4282.91	581	Promoter (<=1kb)	457	1795114	1795949	836	2	ENSG00000151062	ENST00000588896	0	93589	CACNA2D4	calcium voltage-gated channel auxiliary subunit alpha2delta 4
16	57185378	57187532	2155	*	.	1000	14.9909	4284.62	4280.33	745	Promoter (<=1kb)	461	57186137	57209109	22973	1	ENSG00000159579	ENST00000562439	0	89970	RSPRY1	ring finger and SPRY domain containing 1
1	220045621	220046863	1243	*	.	1000	18.6603	4284.46	4280.17	958	Promoter (<=1kb)	446	219968600	220046505	77906	2	ENSG00000136628	ENST00000366923	0	2058	EPRS1	glutamyl-prolyl-tRNA synthetase 1
10	32345982	32347643	1662	*	.	1000	14.1558	4284.14	4279.84	393	Promoter (<=1kb)	455	32267751	32347158	79408	2	ENSG00000120616	ENST00000319778	0	80314	EPC1	enhancer of polycomb homolog 1
12	76083737	76085409	1673	*	.	1000	11.2936	4283.78	4279.48	1026	Promoter (<=1kb)	457	76036585	76084685	48101	2	ENSG00000187109	ENST00000618691	0	4673	NAP1L1	nucleosome assembly protein 1 like 1
16	58733595	58734708	1114	*	.	1000	19.2943	4283.17	4278.88	761	Promoter (<=1kb)	461	58707131	58734316	27186	2	ENSG00000125166	ENST00000245206	0	2806	GOT2	glutamic-oxaloacetic transaminase 2
16	57734848	57737067	2220	*	.	1000	13.1944	4277.76	4273.47	761	Promoter (<=1kb)	461	57735739	57752055	16317	1	ENSG00000140854	ENST00000562592	0	10300	KATNB1	katanin regulatory subunit B1
20	30585181	30586251	1071	*	.	1000	24.4451	4277.05	4272.76	262	Distal Intergenic	465	30545601	30551470	5870	1	ENSG00000283443	ENST00000636528	39580	NA	NA	NA
15	78872523	78874176	1654	*	.	1000	12.5323	4276.53	4272.24	367	Promoter (<=1kb)	460	78872814	78898133	25320	1	ENSG00000185787	ENST00000331268	0	10933	MORF4L1	mortality factor 4 like 1
12	76878104	76879869	1766	*	.	1000	13.4193	4273.9	4269.61	1035	Promoter (<=1kb)	457	76858709	76879019	20311	2	ENSG00000175183	ENST00000311083	0	1466	CSRP2	cysteine and glycine rich protein 2
16	1342552	1343600	1049	*	.	1000	12.4806	4273.39	4269.1	736	Promoter (<=1kb)	461	1343318	1345073	1756	1	ENSG00000007516	ENST00000568198	0	8938	BAIAP3	BAI1 associated protein 3
9	21802000	21803599	1600	*	.	1000	16.9441	4272.55	4268.26	632	Promoter (<=1kb)	454	21802636	21867081	64446	1	ENSG00000099810	ENST00000644715	0	4507	MTAP	methylthioadenosine phosphorylase
19	56314102	56315622	1521	*	.	1000	15.7271	4272.11	4267.82	1110	Promoter (<=1kb)	464	56221303	56314839	93537	2	ENSG00000131848	ENST00000683990	0	79149	ZSCAN5A	zinc finger and SCAN domain containing 5A
9	131372914	131374348	1435	*	.	1000	17.0572	4271.92	4267.63	617	Promoter (<=1kb)	454	131373636	131430259	56624	1	ENSG00000288701	ENST00000682525	0	NA	NA	NA
19	58498842	58500058	1217	*	.	1000	20.1698	4269.57	4265.29	647	Promoter (<=1kb)	464	58479512	58499263	19752	2	ENSG00000083807	ENST00000595851	0	10998	SLC27A5	solute carrier family 27 member 5
3	66997905	66999074	1170	*	.	1000	19.9979	4269.51	4265.23	307	Promoter (<=1kb)	448	66998307	67003697	5391	1	ENSG00000163376	ENST00000484414	0	84541	KBTBD8	kelch repeat and BTB domain containing 8
17	714177	716044	1868	*	.	1000	17.4076	4269.42	4265.13	714	Promoter (<=1kb)	462	508668	714839	206172	2	ENSG00000141252	ENST00000437048	0	55275	VPS53	VPS53 subunit of GARP complex
17	50094124	50095637	1514	*	.	1000	12.4512	4268.99	4264.71	1156	Promoter (<=1kb)	462	50094737	50111058	16322	1	ENSG00000005882	ENST00000007708	0	5164	PDK2	pyruvate dehydrogenase kinase 2
14	21269124	21270237	1114	*	.	1000	15.699	4268.17	4263.88	631	Promoter (<=1kb)	459	21209136	21269494	60359	2	ENSG00000092199	ENST00000336053	0	3183	HNRNPC	heterogeneous nuclear ribonucleoprotein C
17	69326411	69327915	1505	*	.	1000	15.3966	4267.57	4263.28	876	Promoter (<=1kb)	462	69244311	69327133	82823	2	ENSG00000154265	ENST00000392676	0	23461	ABCA5	ATP binding cassette subfamily A member 5
14	24113697	24115465	1769	*	.	1000	12.4847	4267.21	4262.93	959	Promoter (<=1kb)	459	24114195	24117306	3112	1	ENSG00000100897	ENST00000559017	0	80344	DCAF11	DDB1 and CUL4 associated factor 11
2	237085112	237086390	1279	*	.	1000	22.0242	4266.8	4262.52	680	Promoter (<=1kb)	447	237085882	237098618	12737	1	ENSG00000198612	ENST00000392008	0	10920	COPS8	COP9 signalosome subunit 8
1	121183833	121185750	1918	*	.	1000	9.73451	4266.55	4262.27	605	Promoter (<=1kb)	446	121184811	121187305	2495	1	ENSG00000171943	ENST00000617209	0	653464	SRGAP2C	SLIT-ROBO Rho GTPase activating protein 2C
12	76347886	76349022	1137	*	.	1000	19.5337	4265.95	4261.66	600	Promoter (<=1kb)	457	76344474	76348415	3942	2	ENSG00000179941	ENST00000650064	0	79738	BBS10	Bardet-Biedl syndrome 10
12	15910795	15911723	929	*	.	1000	19.679	4264.93	4260.64	515	Promoter (<=1kb)	457	15911302	16036292	124991	1	ENSG00000023697	ENST00000526521	0	51071	DERA	deoxyribose-phosphate aldolase
9	35071684	35073152	1469	*	.	1000	12.3908	4264.71	4260.42	1004	Promoter (<=1kb)	454	35053928	35072623	18696	2	ENSG00000165280	ENST00000679902	0	7415	VCP	valosin containing protein
16	1782129	1783132	1004	*	.	1000	11.9539	4264.39	4260.1	754	Promoter (<=1kb)	461	1782932	1787024	4093	1	ENSG00000095906	ENST00000566447	0	10101	NUBP2	nucleotide binding protein 2
17	82698442	82699481	1040	*	.	1000	15.6255	4264.13	4259.85	355	Promoter (<=1kb)	462	82654973	82698698	43726	2	ENSG00000141542	ENST00000571995	0	10966	RAB40B	RAB40B, member RAS oncogene family
10	124801372	124802625	1254	*	.	1000	24.0211	4263.21	4258.93	383	Promoter (<=1kb)	455	124801819	124836667	34849	1	ENSG00000165660	ENST00000298492	0	23172	ABRAXAS2	abraxas 2, BRISC complex subunit
2	130371716	130373598	1883	*	.	1000	15.3879	4260.84	4256.56	961	Promoter (<=1kb)	447	130371998	130373989	1992	1	ENSG00000072135	ENST00000481492	0	26469	PTPN18	protein tyrosine phosphatase non-receptor type 18
17	45246832	45248466	1635	*	.	1000	10.9605	4260.13	4255.85	1059	Promoter (<=1kb)	462	45245186	45248339	3154	2	ENSG00000233483	ENST00000420431	0	NA	NA	NA
19	47272920	47274906	1987	*	.	1000	9.94494	4259.86	4255.58	714	Promoter (<=1kb)	464	47274885	47275723	839	1	ENSG00000257704	ENST00000552360	0	255783	INAFM1	InaF motif containing 1
3	88058227	88060083	1857	*	.	1000	13.7112	4257.34	4253.06	1006	Promoter (<=1kb)	448	88051944	88059048	7105	2	ENSG00000163320	ENST00000309534	0	8545	CGGBP1	CGG triplet repeat binding protein 1
12	51082580	51084023	1444	*	.	1000	19.5568	4254.24	4249.96	1065	Promoter (<=1kb)	457	51061205	51083596	22392	2	ENSG00000110925	ENST00000228515	0	81566	CSRNP2	cysteine and serine rich nuclear protein 2
7	105012368	105014359	1992	*	.	1000	9.87979	4253.33	4249.05	773	Promoter (<=1kb)	452	105014164	105112658	98495	1	ENSG00000005483	ENST00000257745	0	55904	KMT2E	lysine methyltransferase 2E (inactive)
14	74301927	74303568	1642	*	.	1000	20.2058	4252.57	4248.29	1069	Promoter (<=1kb)	459	74285269	74302934	17666	2	ENSG00000119688	ENST00000356924	0	5826	ABCD4	ATP binding cassette subfamily D member 4
11	66288509	66290016	1508	*	.	1000	13.0676	4252.54	4248.26	739	Promoter (<=1kb)	456	66284580	66289128	4549	2	ENSG00000174851	ENST00000471387	0	10897	YIF1A	Yip1 interacting factor homolog A, membrane trafficking protein
6	5003335	5004634	1300	*	.	1000	19.3484	4252.09	4247.82	370	Promoter (<=1kb)	451	4994717	5004037	9321	2	ENSG00000124787	ENST00000380051	0	10799	RPP40	ribonuclease P/MRP subunit p40
11	16737912	16739181	1270	*	.	1000	18.6875	4247.87	4243.59	591	Promoter (<=1kb)	456	16264449	16738643	474195	2	ENSG00000110693	ENST00000530378	0	55553	SOX6	SRY-box transcription factor 6
19	40425335	40426639	1305	*	.	1000	8.43079	4247.57	4243.29	586	Promoter (<=1kb)	464	40421589	40425992	4404	2	ENSG00000197019	ENST00000357949	0	29950	SERTAD1	SERTA domain containing 1
17	14300618	14301908	1291	*	.	1000	11.3878	4247.12	4242.84	395	Promoter (<=1kb)	462	14301081	14349404	48324	1	ENSG00000125430	ENST00000360954	0	9953	HS3ST3B1	heparan sulfate-glucosamine 3-sulfotransferase 3B1
16	30370334	30371424	1091	*	.	1000	12.5319	4245.72	4241.44	499	Promoter (<=1kb)	461	30357102	30370494	13393	2	ENSG00000169221	ENST00000409939	0	26000	TBC1D10B	TBC1 domain family member 10B
9	114586945	114588263	1319	*	.	1000	19.7836	4245.46	4241.19	637	Promoter (<=1kb)	454	114587706	114598384	10679	1	ENSG00000136888	ENST00000677115	0	9550	ATP6V1G1	ATPase H+ transporting V1 subunit G1
17	63773234	63774752	1519	*	.	1000	12.3645	4244.94	4240.66	537	Promoter (<=1kb)	462	63745255	63773597	28343	2	ENSG00000108588	ENST00000225726	0	57003	CCDC47	coiled-coil domain containing 47
2	37230667	37232554	1888	*	.	1000	18.1303	4244.07	4239.79	972	Promoter (<=1kb)	447	37231631	37247576	15946	1	ENSG00000003509	ENST00000455230	0	55471	NDUFAF7	NADH:ubiquinone oxidoreductase complex assembly factor 7
3	28348327	28349873	1547	*	.	1000	13.9435	4243.96	4239.69	799	Promoter (<=1kb)	448	28321047	28348824	27778	2	ENSG00000163512	ENST00000479665	0	64343	AZI2	5-azacytidine induced 2
2	119759353	119760489	1137	*	.	1000	15.1478	4243.82	4239.54	312	Promoter (<=1kb)	447	119759922	119984899	224978	1	ENSG00000088179	ENST00000263708	0	5775	PTPN4	protein tyrosine phosphatase non-receptor type 4
X	14872779	14873900	1122	*	.	1000	19.7305	4243.66	4239.38	549	Promoter (<=1kb)	468	14873421	14922327	48907	1	ENSG00000130150	ENST00000380492	0	158747	MOSPD2	motile sperm domain containing 2
12	118372413	118373349	937	*	.	1000	12.4265	4242.57	4238.29	553	Promoter (<=1kb)	457	118149801	118372907	223107	2	ENSG00000135090	ENST00000392533	0	51347	TAOK3	TAO kinase 3
15	56464454	56465729	1276	*	.	1000	23.7237	4242.15	4237.87	740	Promoter (<=1kb)	460	56428724	56465137	36414	2	ENSG00000138587	ENST00000260453	0	55329	MNS1	meiosis specific nuclear structural 1
20	33719632	33720917	1286	*	.	1000	19.9144	4240.81	4236.53	739	Promoter (<=1kb)	465	33702758	33720310	17553	2	ENSG00000101417	ENST00000409299	0	11264	PXMP4	peroxisomal membrane protein 4
X	108090944	108092313	1370	*	.	1000	17.2021	4240.3	4236.03	754	Promoter (<=1kb)	468	108084207	108091542	7336	2	ENSG00000101843	ENST00000217958	0	5716	PSMD10	proteasome 26S subunit, non-ATPase 10
14	67240489	67242074	1586	*	.	1000	12.9387	4240.28	4236.01	683	Promoter (<=1kb)	459	67240713	67335798	95086	1	ENSG00000072415	ENST00000677382	0	64398	PALS1	protein associated with LIN7 1, MAGUK family member
16	68448144	68449047	904	*	.	1000	18.5051	4239.07	4234.8	589	Promoter (<=1kb)	461	68358327	68448508	90182	2	ENSG00000103056	ENST00000219334	0	55512	SMPD3	sphingomyelin phosphodiesterase 3
10	5888845	5890359	1515	*	.	1000	15.1031	4238.8	4234.53	1065	Promoter (<=1kb)	455	5890203	5937594	47392	1	ENSG00000134452	ENST00000397269	0	84893	FBH1	F-box DNA helicase 1
12	21500945	21502437	1493	*	.	1000	16.9499	4236.35	4232.08	723	Promoter (<=1kb)	457	21468910	21501635	32726	2	ENSG00000004700	ENST00000444129	0	5965	RECQL	RecQ like helicase
4	127964475	127966104	1630	*	.	1000	15.7379	4235.68	4231.41	880	Promoter (<=1kb)	449	127917799	127965949	48151	2	ENSG00000164073	ENST00000296468	0	256471	MFSD8	major facilitator superfamily domain containing 8
17	76725911	76727519	1609	*	.	1000	10.8961	4233.84	4229.57	779	Promoter (<=1kb)	462	76712832	76726679	13848	2	ENSG00000070495	ENST00000445478	0	23210	JMJD6	jumonji domain containing 6, arginine demethylase and lysine hydroxylase
7	133252753	133253891	1139	*	.	1000	25.4624	4232.46	4228.19	261	Promoter (<=1kb)	452	133253073	133484197	231125	1	ENSG00000131558	ENST00000393161	0	60412	EXOC4	exocyst complex component 4
17	17041045	17042515	1471	*	.	1000	13.5876	4228.15	4223.88	1231	Promoter (<=1kb)	462	17042457	17192643	150187	1	ENSG00000133030	ENST00000651222	0	23164	MPRIP	myosin phosphatase Rho interacting protein
16	56931489	56933231	1743	*	.	1000	15.3897	4227.51	4223.24	552	Promoter (<=1kb)	461	56932142	56935554	3413	1	ENSG00000051108	ENST00000562914	0	9709	HERPUD1	homocysteine inducible ER protein with ubiquitin like domain 1
7	99471737	99473597	1861	*	.	1000	16.6718	4225.02	4220.75	1076	Promoter (<=1kb)	452	99472890	99482326	9437	1	ENSG00000198556	ENST00000483089	0	285989	ZNF789	zinc finger protein 789
17	19752253	19753421	1169	*	.	1000	10.2846	4223.14	4218.87	975	Promoter (1-2kb)	462	19755244	19756207	964	1	ENSG00000230607	ENST00000431878	-1823	NA	NA	NA
14	35341220	35342655	1436	*	.	1000	13.3275	4222.22	4217.95	541	Distal Intergenic	459	35362232	35363628	1397	2	ENSG00000258860	ENST00000555024	20973	NA	NA	NA
2	173963664	173966052	2389	*	.	1000	11.0967	4220.83	4216.57	1781	Promoter (<=1kb)	447	173900775	173965373	64599	2	ENSG00000172845	ENST00000310015	0	6670	SP3	Sp3 transcription factor
8	123041526	123042908	1383	*	.	1000	14.7721	4217.83	4213.56	884	Promoter (<=1kb)	453	123013170	123042302	29133	2	ENSG00000136986	ENST00000259512	0	79139	DERL1	derlin 1
12	8949276	8950414	1139	*	.	1000	13.9434	4217.26	4213	442	Promoter (<=1kb)	457	8940361	8949645	9285	2	ENSG00000003056	ENST00000000412	0	4074	M6PR	mannose-6-phosphate receptor, cation dependent
5	176388061	176389632	1572	*	.	1000	12.4344	4217.01	4212.75	987	Promoter (<=1kb)	450	176383946	176388598	4653	2	ENSG00000048162	ENST00000614830	0	51491	NOP16	NOP16 nucleolar protein
7	75527528	75528549	1022	*	.	1000	20.6684	4216.92	4212.65	664	Promoter (<=1kb)	452	75507747	75528051	20305	2	ENSG00000127957	ENST00000394921	0	5387	PMS2P3	PMS1 homolog 2, mismatch repair system component pseudogene 3
14	52551692	52553439	1748	*	.	1000	14.9063	4216.55	4212.28	966	Promoter (<=1kb)	459	52430596	52552505	121910	2	ENSG00000087301	ENST00000281741	0	57544	TXNDC16	thioredoxin domain containing 16
4	2262010	2263025	1016	*	.	1000	14.6029	4216.4	4212.13	278	Promoter (<=1kb)	449	2247432	2262109	14678	2	ENSG00000123933	ENST00000337190	0	10608	MXD4	MAX dimerization protein 4
12	98644064	98645948	1885	*	.	1000	10.5498	4216.23	4211.97	1116	Promoter (<=1kb)	457	98645290	98735433	90144	1	ENSG00000120868	ENST00000551964	0	317	APAF1	apoptotic peptidase activating factor 1
19	39833243	39834735	1493	*	.	1000	13.5473	4214.67	4210.4	458	Promoter (<=1kb)	464	39825350	39833634	8285	2	ENSG00000105204	ENST00000593685	0	9149	DYRK1B	dual specificity tyrosine phosphorylation regulated kinase 1B
1	100249148	100250300	1153	*	.	1000	28.1617	4214.48	4210.22	760	Promoter (<=1kb)	446	100186919	100249834	62916	2	ENSG00000137992	ENST00000370132	0	1629	DBT	dihydrolipoamide branched chain transacylase E2
19	34733391	34734772	1382	*	.	1000	14.7735	4209.63	4205.37	804	Promoter (<=1kb)	464	34734155	34739620	5466	1	ENSG00000197841	ENST00000599244	0	339318	ZNF181	zinc finger protein 181
1	70410366	70411685	1320	*	.	1000	20.3861	4209.12	4204.86	773	Promoter (<=1kb)	446	70411218	70439851	28634	1	ENSG00000116761	ENST00000411986	0	1491	CTH	cystathionine gamma-lyase
14	19345174	19346983	1810	*	.	1000	14.9948	4208.14	4203.88	1001	Intron (ENST00000620186/ENSG00000274827, intron 2 of 2)	459	19331866	19337730	5865	2	ENSG00000244306	ENST00000610531	-7444	503639	DUXAP10	double homeobox A pseudogene 10
2	109613407	109614701	1295	*	.	1000	13.2756	4208	4203.74	701	Promoter (<=1kb)	447	109542799	109613966	71168	2	ENSG00000186522	ENST00000397712	0	151011	SEPTIN10	septin 10
17	50865851	50868102	2252	*	.	1000	8.53809	4207.65	4203.39	774	Promoter (<=1kb)	462	50862223	50866354	4132	2	ENSG00000141232	ENST00000499247	0	10140	TOB1	transducer of ERBB2, 1
6	10722395	10723709	1315	*	.	1000	20.5271	4205.44	4201.18	637	Promoter (<=1kb)	451	10722915	10731119	8205	1	ENSG00000111843	ENST00000541412	0	51522	TMEM14C	transmembrane protein 14C
8	143290458	143291814	1357	*	.	1000	15.6102	4205.32	4201.06	918	Promoter (<=1kb)	453	143290910	143296287	5378	1	ENSG00000185730	ENST00000518575	0	79943	ZNF696	zinc finger protein 696
8	78665453	78666850	1398	*	.	1000	16.9896	4205.15	4200.89	612	Promoter (<=1kb)	453	78666089	78679390	13302	1	ENSG00000104427	ENST00000521873	0	51101	ZC2HC1A	zinc finger C2HC-type containing 1A
9	131124644	131126373	1730	*	.	1000	22.2624	4203.4	4199.14	822	Promoter (<=1kb)	454	131125586	131234663	109078	1	ENSG00000126883	ENST00000359428	0	8021	NUP214	nucleoporin 214
2	176001329	176002973	1645	*	.	1000	18.8133	4201.94	4197.68	951	Promoter (<=1kb)	447	175923882	176002267	78386	2	ENSG00000144320	ENST00000272748	0	80856	LNPK	lunapark, ER junction formation factor
20	29444923	29445914	992	*	.	1000	23.9841	4198.68	4194.43	639	Distal Intergenic	465	29448517	29449306	790	2	ENSG00000282911	ENST00000635630	3392	NA	NA	NA
15	55196302	55197802	1501	*	.	1000	20.1035	4198.03	4193.78	747	Promoter (<=1kb)	460	55180806	55196941	16136	2	ENSG00000137876	ENST00000260443	0	51187	RSL24D1	ribosomal L24 domain containing 1
14	105490494	105491981	1488	*	.	1000	6.22752	4197.31	4193.06	645	Promoter (<=1kb)	459	105491065	105497875	6811	1	ENSG00000185347	ENST00000421892	0	283643	TEDC1	tubulin epsilon and delta complex 1
4	52711918	52713071	1154	*	.	1000	20.5211	4195.88	4191.62	395	Promoter (<=1kb)	449	52712325	52714141	1817	1	ENSG00000226950	ENST00000411630	0	57291	DANCR	differentiation antagonizing non-protein coding RNA
2	9843022	9844357	1336	*	.	1000	14.7344	4195.32	4191.06	694	Promoter (<=1kb)	447	9843443	9846113	2671	1	ENSG00000115750	ENST00000625239	0	9014	TAF1B	TATA-box binding protein associated factor, RNA polymerase I subunit B
12	7017816	7019133	1318	*	.	1000	13.4907	4194.01	4189.75	772	Promoter (<=1kb)	457	6976185	7018476	42292	2	ENSG00000111684	ENST00000261407	0	10162	LPCAT3	lysophosphatidylcholine acyltransferase 3
3	4985450	4987491	2042	*	.	1000	7.48898	4193.8	4189.55	1452	Downstream (<=300bp)	448	4896969	4980414	83446	2	ENSG00000235831	ENST00000668962	-5036	100507582	BHLHE40-AS1	BHLHE40 antisense RNA 1
17	73797443	73798751	1309	*	.	1000	15.0526	4193.51	4189.25	850	Intron (ENST00000657440/ENSG00000234721, intron 3 of 4)	462	73789246	73800963	11718	1	ENSG00000234721	ENST00000656457	8197	400620	LINC02092	long intergenic non-protein coding RNA 2092
X	63754288	63755594	1307	*	.	1000	20.3147	4193.35	4189.1	942	Promoter (<=1kb)	468	63634967	63755113	120147	2	ENSG00000131089	ENST00000253401	0	23229	ARHGEF9	Cdc42 guanine nucleotide exchange factor 9
3	114056130	114057269	1140	*	.	1000	19.2505	4193.05	4188.8	444	Promoter (<=1kb)	448	114056735	114088349	31615	1	ENSG00000151576	ENST00000485050	0	79691	QTRT2	queuine tRNA-ribosyltransferase accessory subunit 2
14	21510576	21511687	1112	*	.	1000	18.857	4191.9	4187.65	870	Promoter (<=1kb)	459	21498138	21511340	13203	2	ENSG00000165819	ENST00000298717	0	56339	METTL3	methyltransferase like 3
2	189440755	189441970	1216	*	.	1000	18.8642	4191.79	4187.54	672	Promoter (<=1kb)	447	189441446	189475546	34101	1	ENSG00000115368	ENST00000436347	0	84128	WDR75	WD repeat domain 75
17	75123964	75125206	1243	*	.	1000	12.1405	4191.33	4187.08	558	Intron (ENST00000581078/ENSG00000125449, intron 2 of 2)	462	75130883	75133043	2161	1	ENSG00000279035	ENST00000625094	-5677	NA	NA	NA
13	95676102	95678015	1914	*	.	1000	15.5415	4191.01	4186.76	960	Promoter (<=1kb)	458	95677139	95794988	117850	1	ENSG00000102580	ENST00000602402	0	5611	DNAJC3	DnaJ heat shock protein family (Hsp40) member C3
11	44065793	44067163	1371	*	.	1000	17.7867	4190.45	4186.2	369	Promoter (<=1kb)	456	44065925	44077699	11775	1	ENSG00000110455	ENST00000533208	0	84680	ACCS	1-aminocyclopropane-1-carboxylate synthase homolog (inactive)
19	48332637	48334411	1775	*	.	1000	11.8848	4189.62	4185.37	1443	3' UTR	464	48329270	48330483	1214	1	ENSG00000142227	ENST00000597057	3367	2014	EMP3	epithelial membrane protein 3
15	75738053	75739338	1286	*	.	1000	16.9089	4189.45	4185.2	672	Promoter (<=1kb)	460	75727670	75738623	10954	2	ENSG00000246877	ENST00000501931	0	NA	NA	NA
10	38355937	38357043	1107	*	.	1000	24.1405	4189.24	4184.99	371	Promoter (<=1kb)	455	38356380	38378505	22126	1	ENSG00000099251	ENST00000494540	0	158160	HSD17B7P2	hydroxysteroid 17-beta dehydrogenase 7 pseudogene 2
15	90994047	90995161	1115	*	.	1000	15.3133	4188.51	4184.26	732	Promoter (<=1kb)	460	90966040	90994535	28496	2	ENSG00000198901	ENST00000394249	0	9055	PRC1	protein regulator of cytokinesis 1
19	37217514	37218996	1483	*	.	1000	17.3603	4188.13	4183.88	656	Promoter (<=1kb)	464	37217926	37224879	6954	1	ENSG00000188283	ENST00000585441	0	163087	ZNF383	zinc finger protein 383
10	72272718	72274470	1753	*	.	1000	8.39368	4187.81	4183.56	1154	Promoter (<=1kb)	455	72273919	72275998	2080	1	ENSG00000168209	ENST00000491934	0	54541	DDIT4	DNA damage inducible transcript 4
3	119497889	119499216	1328	*	.	1000	19.8966	4187.62	4183.37	554	Promoter (<=1kb)	448	119498547	119523823	25277	1	ENSG00000113845	ENST00000493694	0	51300	TIMMDC1	translocase of inner mitochondrial membrane domain containing 1
16	78099191	78100417	1227	*	.	1000	15.2093	4184.51	4180.26	281	Promoter (<=1kb)	461	78099400	78574858	475459	1	ENSG00000186153	ENST00000627394	0	51741	WWOX	WW domain containing oxidoreductase
3	4492174	4494148	1975	*	.	1000	14.72	4183.98	4179.73	1091	Promoter (<=1kb)	448	4493345	4521164	27820	1	ENSG00000150995	ENST00000649669	0	3708	ITPR1	inositol 1,4,5-trisphosphate receptor type 1
5	43120712	43122459	1748	*	.	1000	13.46	4183.65	4179.4	823	Promoter (<=1kb)	450	43120883	43161773	40891	1	ENSG00000172262	ENST00000515326	0	7690	ZNF131	zinc finger protein 131
7	104207211	104208620	1410	*	.	1000	25.042	4181.04	4176.79	852	Promoter (<=1kb)	452	104126341	104208013	81673	2	ENSG00000164815	ENST00000297431	0	5001	ORC5	origin recognition complex subunit 5
16	23149361	23149998	638	*	.	1000	21.2189	4179.3	4175.05	242	Promoter (<=1kb)	461	23061406	23149452	88047	2	ENSG00000103404	ENST00000219689	0	57478	USP31	ubiquitin specific peptidase 31
7	5569195	5570914	1720	*	.	1000	13.6725	4178.13	4173.88	1044	Distal Intergenic	452	5527152	5563902	36751	2	ENSG00000075624	ENST00000675515	-5293	60	ACTB	actin beta
15	90265120	90266482	1363	*	.	1000	14.8995	4177.89	4173.64	534	Promoter (<=1kb)	460	90265659	90273231	7573	1	ENSG00000182768	ENST00000331497	0	51335	NGRN	neugrin, neurite outgrowth associated
10	70169853	70171326	1474	*	.	1000	19.8403	4177.67	4173.42	801	Promoter (<=1kb)	455	70147289	70170514	23226	2	ENSG00000079332	ENST00000373241	0	56681	SAR1A	secretion associated Ras related GTPase 1A
1	53325735	53327884	2150	*	.	1000	12.4027	4177.5	4173.25	616	Promoter (<=1kb)	446	53245547	53327883	82337	2	ENSG00000157193	ENST00000668071	0	7804	LRP8	LDL receptor related protein 8
17	45371023	45372738	1716	*	.	1000	13.6308	4176.97	4172.73	831	Promoter (<=1kb)	462	45371402	45372057	656	2	ENSG00000267446	ENST00000589730	0	NA	NA	NA
7	138459599	138461335	1737	*	.	1000	13.2261	4174.77	4170.52	683	Promoter (<=1kb)	452	138460259	138589996	129738	1	ENSG00000122779	ENST00000343526	0	8805	TRIM24	tripartite motif containing 24
17	14068744	14070185	1442	*	.	1000	22.2244	4170.38	4166.13	718	Promoter (<=1kb)	462	14069490	14217916	148427	1	ENSG00000006695	ENST00000670279	0	1352	COX10	cytochrome c oxidase assembly factor heme A:farnesyltransferase COX10
15	92803701	92804638	938	*	.	1000	8.24927	4168.6	4164.36	349	Intron (ENST00000557398/ENSG00000185442, intron 1 of 3)	460	92808451	92809057	607	1	ENSG00000274215	ENST00000614509	-3813	NA	NA	NA
7	12686357	12687903	1547	*	.	1000	10.2583	4168.6	4164.36	1153	Promoter (<=1kb)	452	12686856	12689179	2324	1	ENSG00000122644	ENST00000396662	0	10124	ARL4A	ADP ribosylation factor like GTPase 4A
11	73779011	73779971	961	*	.	1000	19.647	4168.27	4164.02	558	Distal Intergenic	456	73787872	73865133	77262	1	ENSG00000175581	ENST00000508278	-7901	51642	MRPL48	mitochondrial ribosomal protein L48
15	101201280	101202162	883	*	.	1000	21.3306	4168.22	4163.98	282	Intron (ENST00000254190/ENSG00000131873, intron 2 of 2)	460	101187541	101189567	2027	2	ENSG00000131873	ENST00000561143	-11713	22856	CHSY1	chondroitin sulfate synthase 1
5	133967756	133968985	1230	*	.	1000	14.4509	4167.21	4162.97	894	Promoter (<=1kb)	450	133955510	133968625	13116	2	ENSG00000113583	ENST00000231512	0	56951	C5orf15	chromosome 5 open reading frame 15
19	48720369	48721390	1022	*	.	1000	13.7239	4166.9	4162.66	466	Promoter (<=1kb)	464	48712725	48719725	7001	2	ENSG00000176909	ENST00000318083	-644	284358	MAMSTR	MEF2 activating motif and SAP domain containing transcriptional regulator
11	65040623	65041824	1202	*	.	1000	15.3864	4166.12	4161.88	489	Promoter (<=1kb)	456	65040901	65044799	3899	1	ENSG00000168061	ENST00000531072	0	29901	SAC3D1	SAC3 domain containing 1
16	11797150	11798249	1100	*	.	1000	18.2109	4164.8	4160.56	299	Promoter (<=1kb)	461	11750597	11797258	46662	2	ENSG00000122299	ENST00000355758	0	29066	ZC3H7A	zinc finger CCCH-type containing 7A
17	19088578	19089765	1188	*	.	1000	10.9471	4164.76	4160.52	683	Promoter (2-3kb)	462	19091069	19091825	757	2	ENSG00000263394	ENST00000583141	2060	NA	NA	NA
2	218658604	218660339	1736	*	.	1000	14.1418	4163.81	4159.57	1048	Promoter (<=1kb)	447	218658764	218661217	2454	1	ENSG00000074582	ENST00000428880	0	617	BCS1L	BCS1 homolog, ubiquinol-cytochrome c reductase complex chaperone
17	16535440	16536420	981	*	.	1000	18.7144	4163.81	4159.57	402	Distal Intergenic	462	16525832	16529290	3459	1	ENSG00000286743	ENST00000655442	9608	NA	NA	NA
2	676044	677864	1821	*	.	1000	9.60259	4162.82	4158.58	784	Promoter (<=1kb)	447	663877	677406	13530	2	ENSG00000151353	ENST00000281017	0	129787	TMEM18	transmembrane protein 18
8	51898326	51900159	1834	*	.	1000	13.5893	4161.93	4157.69	937	Promoter (<=1kb)	453	51817575	51899186	81612	2	ENSG00000168300	ENST00000544451	0	115294	PCMTD1	protein-L-isoaspartate (D-aspartate) O-methyltransferase domain containing 1
20	17968195	17969644	1450	*	.	1000	12.6328	4161.39	4157.15	768	Promoter (<=1kb)	465	17941597	17968800	27204	2	ENSG00000089006	ENST00000490175	0	27131	SNX5	sorting nexin 5
7	66075406	66076703	1298	*	.	1000	19.4544	4160.44	4156.2	393	Promoter (<=1kb)	452	66075800	66092930	17131	1	ENSG00000126522	ENST00000672586	0	435	ASL	argininosuccinate lyase
4	112231262	112232602	1341	*	.	1000	14.7553	4160.26	4156.02	501	Promoter (<=1kb)	449	112231740	112265319	33580	1	ENSG00000138660	ENST00000510527	0	55435	AP1AR	adaptor related protein complex 1 associated regulatory protein
12	132887044	132888428	1385	*	.	1000	22.2947	4158.51	4154.28	670	Promoter (<=1kb)	457	132832356	132887605	55250	2	ENSG00000072609	ENST00000450056	0	55743	CHFR	checkpoint with forkhead and ring finger domains
7	120950403	120951513	1111	*	.	1000	17.9047	4158.47	4154.23	232	Promoter (<=1kb)	452	120950763	120956980	6218	1	ENSG00000071243	ENST00000339121	0	54556	ING3	inhibitor of growth family member 3
12	6723659	6724862	1204	*	.	1000	17.6444	4156.44	4152.2	447	Promoter (<=1kb)	457	6724014	6731873	7860	1	ENSG00000111652	ENST00000626119	0	50813	COPS7A	COP9 signalosome subunit 7A
20	41618075	41619166	1092	*	.	1000	22.0254	4156.43	4152.2	420	Promoter (<=1kb)	465	41402083	41618377	216295	2	ENSG00000124177	ENST00000373233	0	84181	CHD6	chromodomain helicase DNA binding protein 6
7	100611729	100612858	1130	*	.	1000	15.5174	4154.7	4150.46	726	Promoter (<=1kb)	452	100612102	100615326	3225	1	ENSG00000106330	ENST00000223054	0	64598	MOSPD3	motile sperm domain containing 3
17	59892216	59893937	1722	*	.	1000	15.8097	4153.72	4149.49	882	Promoter (<=1kb)	462	59859479	59892943	33465	2	ENSG00000108423	ENST00000325752	0	51174	TUBD1	tubulin delta 1
16	52890	54208	1319	*	.	1000	17.3579	4149.66	4145.42	800	Promoter (<=1kb)	461	46407	53608	7202	2	ENSG00000161980	ENST00000293860	0	51728	POLR3K	RNA polymerase III subunit K
2	238863884	238865107	1224	*	.	1000	15.1983	4148.78	4144.55	542	Intron (ENST00000448943/ENSG00000233608, intron 1 of 1)	447	238848085	238910534	62450	1	ENSG00000233608	ENST00000612363	15799	117581	TWIST2	twist family bHLH transcription factor 2
14	19053039	19055291	2253	*	.	1000	17.1607	4148.55	4144.31	815	Promoter (<=1kb)	459	19054341	19055551	1211	1	ENSG00000258314	ENST00000548416	0	NA	NA	NA
20	5112399	5113810	1412	*	.	1000	15.099	4147.7	4143.46	612	Promoter (<=1kb)	465	5068232	5112790	44559	2	ENSG00000089063	ENST00000615008	0	29058	TMEM230	transmembrane protein 230
17	16285755	16287473	1719	*	.	1000	11.3731	4147.48	4143.25	383	Intron (ENST00000607144/ENSG00000108474, intron 2 of 2)	462	16282014	16282088	75	1	ENSG00000221355	ENST00000408428	3741	100302124	MIR1288	microRNA 1288
9	6006874	6008721	1848	*	.	1000	14.4957	4146.86	4142.63	198	Promoter (<=1kb)	454	5919022	6007787	88766	2	ENSG00000183354	ENST00000381461	0	158358	KIAA2026	KIAA2026
2	3377327	3378605	1279	*	.	1000	11.1378	4145.63	4141.4	631	Promoter (<=1kb)	447	3188925	3377830	188906	2	ENSG00000032389	ENST00000398659	0	7260	EIPR1	EARP complex and GARP complex interacting protein 1
6	154733021	154734471	1451	*	.	1000	15.1694	4145.42	4141.19	1188	Promoter (<=1kb)	451	154733378	154792946	59569	1	ENSG00000213079	ENST00000461219	0	22828	SCAF8	SR-related CTD associated factor 8
17	64974820	64976383	1564	*	.	1000	14.2968	4144.8	4140.57	678	Promoter (<=1kb)	462	64966550	64975573	9024	2	ENSG00000214174	ENST00000430983	0	201283	AMZ2P1	AMZ2 pseudogene 1
2	28893955	28895479	1525	*	.	1000	16.3165	4141.51	4137.27	603	Promoter (<=1kb)	447	28894667	28948219	53553	1	ENSG00000163811	ENST00000407426	0	23160	WDR43	WD repeat domain 43
2	152716925	152719219	2295	*	.	1000	9.07791	4140.82	4136.59	1624	Promoter (<=1kb)	447	152717647	152760890	43244	1	ENSG00000177917	ENST00000690727	0	151188	ARL6IP6	ADP ribosylation factor like GTPase 6 interacting protein 6
15	70762489	70764038	1550	*	.	1000	13.5312	4140.44	4136.21	1044	Promoter (<=1kb)	460	70654554	70763558	109005	2	ENSG00000137831	ENST00000322954	0	55075	UACA	uveal autoantigen with coiled-coil domains and ankyrin repeats
2	27356068	27357594	1527	*	.	1000	12.1921	4139.8	4135.57	1013	Promoter (<=1kb)	447	27325849	27356492	30644	2	ENSG00000115207	ENST00000359541	0	2976	GTF3C2	general transcription factor IIIC subunit 2
19	36378400	36379598	1199	*	.	1000	18.9593	4137.73	4133.5	797	Promoter (<=1kb)	464	36334453	36379201	44749	2	ENSG00000142065	ENST00000270001	0	57677	ZFP14	ZFP14 zinc finger protein
2	203238530	203240058	1529	*	.	1000	13.7372	4136.03	4131.8	729	Promoter (<=1kb)	447	203238977	203297242	58266	1	ENSG00000119004	ENST00000449301	0	57404	CYP20A1	cytochrome P450 family 20 subfamily A member 1
19	48713089	48714693	1605	*	.	1000	11.3544	4135.48	4131.25	1141	Promoter (2-3kb)	464	48715344	48716843	1500	2	ENSG00000176909	ENST00000595591	2150	284358	MAMSTR	MEF2 activating motif and SAP domain containing transcriptional regulator
3	9946127	9947746	1620	*	.	1000	11.0442	4135.42	4131.19	494	Promoter (<=1kb)	448	9947404	9954787	7384	1	ENSG00000230082	ENST00000431558	0	100874032	PRRT3-AS1	PRRT3 antisense RNA 1
16	81006199	81007780	1582	*	.	1000	13.8775	4134.67	4130.44	996	Promoter (<=1kb)	461	80966448	81006885	40438	2	ENSG00000103121	ENST00000219400	0	56942	CMC2	C-X9-C motif containing 2
19	48794984	48796142	1159	*	.	1000	17.9001	4132.66	4128.43	577	Promoter (1-2kb)	464	48796247	48797543	1297	2	ENSG00000105552	ENST00000599510	1401	587	BCAT2	branched chain amino acid transaminase 2
17	3845345	3846598	1254	*	.	1000	16.7206	4132.62	4128.39	939	Promoter (<=1kb)	462	3802158	3846246	44089	2	ENSG00000074356	ENST00000389005	0	55421	NCBP3	nuclear cap binding subunit 3
X	52995160	52996233	1074	*	.	1000	19.5433	4132.44	4128.22	394	Promoter (<=1kb)	468	52947254	52995372	48119	2	ENSG00000268350	ENST00000610625	0	29057	FAM156A	family with sequence similarity 156 member A
1	161453961	161455637	1677	*	.	1000	6.49382	4131.07	4126.84	544	Intron (ENST00000637155/ENSG00000283360, intron 1 of 4)	446	161433444	161440996	7553	2	ENSG00000283317	ENST00000636824	-12965	NA	NA	NA
3	42803374	42804951	1578	*	.	1000	21.4639	4129.52	4125.29	1188	Promoter (<=1kb)	448	42804752	42835773	31022	1	ENSG00000144648	ENST00000565749	0	1238	ACKR2	atypical chemokine receptor 2
10	110871415	110873005	1591	*	.	1000	13.0986	4129.3	4125.08	453	Promoter (<=1kb)	455	110871795	110900005	28211	1	ENSG00000150593	ENST00000393104	0	27250	PDCD4	programmed cell death 4
12	106986483	106987514	1032	*	.	1000	17.4459	4129.22	4124.99	674	Promoter (<=1kb)	457	106977277	106987146	9870	2	ENSG00000120832	ENST00000240050	0	80298	MTERF2	mitochondrial transcription termination factor 2
16	4801830	4803172	1343	*	.	1000	15.8309	4128.85	4124.62	1152	Promoter (<=1kb)	461	4796968	4802633	5666	2	ENSG00000067836	ENST00000322048	0	79641	ROGDI	rogdi atypical leucine zipper
2	27032242	27033782	1541	*	.	1000	19.5532	4127.28	4123.05	652	Promoter (<=1kb)	447	27032910	27035481	2572	1	ENSG00000119777	ENST00000495312	0	54867	TMEM214	transmembrane protein 214
17	41929927	41930938	1012	*	.	1000	19.3487	4127.02	4122.8	594	Promoter (<=1kb)	462	41910239	41930542	20304	2	ENSG00000131473	ENST00000592970	0	47	ACLY	ATP citrate lyase
3	37175417	37177104	1688	*	.	1000	14.4023	4126.51	4122.28	935	Promoter (<=1kb)	448	37052656	37176360	123705	2	ENSG00000093167	ENST00000354379	0	9209	LRRFIP2	LRR binding FLII interacting protein 2
20	34676296	34677600	1305	*	.	1000	16.0973	4125.9	4121.67	866	Promoter (<=1kb)	465	34560542	34677092	116551	2	ENSG00000101464	ENST00000217446	0	128869	PIGU	phosphatidylinositol glycan anchor biosynthesis class U
9	137200620	137201463	844	*	.	1000	14.6902	4123.82	4119.6	317	Promoter (<=1kb)	454	137191619	137200741	9123	2	ENSG00000176058	ENST00000409012	0	286262	TPRN	taperin
7	56051140	56052114	975	*	.	1000	13.0586	4123.65	4119.43	503	Promoter (<=1kb)	452	56051685	56063989	12305	1	ENSG00000146731	ENST00000335503	0	908	CCT6A	chaperonin containing TCP1 subunit 6A
8	38175866	38177685	1820	*	.	1000	15.8303	4121.63	4117.4	940	Promoter (<=1kb)	453	38176533	38207741	31209	1	ENSG00000156735	ENST00000521282	0	9530	BAG4	BAG cochaperone 4
7	151057635	151058551	917	*	.	1000	7.38278	4119.54	4115.32	395	Promoter (<=1kb)	452	151053815	151057897	4083	2	ENSG00000164885	ENST00000485972	0	1020	CDK5	cyclin dependent kinase 5
17	44587018	44587994	977	*	.	1000	21.3729	4118.84	4114.62	504	Distal Intergenic	462	44596346	44597344	999	1	ENSG00000271222	ENST00000604227	-8352	NA	NA	NA
X	49268856	49270112	1257	*	.	1000	13.9895	4118.66	4114.44	453	Promoter (<=1kb)	468	49269793	49288090	18298	1	ENSG00000049769	ENST00000055335	0	89801	PPP1R3F	protein phosphatase 1 regulatory subunit 3F
3	27483149	27485339	2191	*	.	1000	15.3707	4118.62	4114.4	1444	Promoter (<=1kb)	448	27372721	27484420	111700	2	ENSG00000033867	ENST00000425128	0	9497	SLC4A7	solute carrier family 4 member 7
11	85854502	85855786	1285	*	.	1000	20.9271	4118.54	4114.31	607	Promoter (<=1kb)	456	85855101	85920021	64921	1	ENSG00000150676	ENST00000280245	0	220047	CCDC83	coiled-coil domain containing 83
19	42279625	42281652	2028	*	.	1000	7.94483	4118.45	4114.23	846	Promoter (<=1kb)	464	42279992	42286893	6902	1	ENSG00000079432	ENST00000575839	0	23152	CIC	capicua transcriptional repressor
19	35748193	35748975	783	*	.	1000	8.47679	4118.3	4114.07	294	Promoter (<=1kb)	464	35747057	35748288	1232	2	ENSG00000267439	ENST00000585365	0	NA	NA	NA
1	46131865	46133661	1797	*	.	1000	16.8091	4116.59	4112.37	1201	Promoter (<=1kb)	446	46040140	46132629	92490	2	ENSG00000117461	ENST00000262741	0	8503	PIK3R3	phosphoinositide-3-kinase regulatory subunit 3
1	205121542	205123099	1558	*	.	1000	22.4847	4114.27	4110.05	804	Promoter (<=1kb)	446	205086142	205121978	35837	2	ENSG00000117222	ENST00000264515	0	5929	RBBP5	RB binding protein 5, histone lysine methyltransferase complex subunit
1	156212591	156213744	1154	*	.	1000	17.1331	4109.77	4105.55	350	Promoter (<=1kb)	446	156212993	156240040	27048	1	ENSG00000160783	ENST00000368279	0	11243	PMF1	polyamine modulated factor 1
12	6752227	6754238	2012	*	.	1000	12.2298	4109.33	4105.11	1445	Promoter (<=1kb)	457	6747996	6753141	5146	2	ENSG00000089693	ENST00000203630	0	8079	MLF2	myeloid leukemia factor 2
19	57915875	57917127	1253	*	.	1000	22.0265	4109.17	4104.96	783	Promoter (<=1kb)	464	57905774	57916592	10819	2	ENSG00000173480	ENST00000312026	0	147687	ZNF417	zinc finger protein 417
5	144170124	144171175	1052	*	.	1000	21.4526	4108.35	4104.13	664	Promoter (<=1kb)	450	144158162	144170659	12498	2	ENSG00000145817	ENST00000274496	0	81555	YIPF5	Yip1 domain family member 5
12	6662629	6663686	1058	*	.	1000	18.9116	4107.67	4103.46	666	Promoter (<=1kb)	457	6650301	6663119	12819	2	ENSG00000111653	ENST00000341550	0	51147	ING4	inhibitor of growth family member 4
11	62831128	62832840	1713	*	.	1000	12.9682	4107.57	4103.35	656	Promoter (<=1kb)	456	62806860	62832051	25192	2	ENSG00000162236	ENST00000294179	0	6811	STX5	syntaxin 5
11	62123623	62125038	1416	*	.	1000	18.8347	4107.48	4103.26	211	Promoter (<=1kb)	456	62123998	62130028	6031	1	ENSG00000149503	ENST00000533896	0	3619	INCENP	inner centromere protein
11	64916068	64917669	1602	*	.	1000	15.2678	4106.56	4102.34	1312	Promoter (<=1kb)	456	64917553	64924460	6908	1	ENSG00000068971	ENST00000413292	0	5526	PPP2R5B	protein phosphatase 2 regulatory subunit B'beta
7	76548926	76550146	1221	*	.	1000	26.4417	4105.28	4101.06	357	Promoter (<=1kb)	452	76549360	76627982	78623	1	ENSG00000205485	ENST00000418663	0	100133091	LOC100133091	uncharacterized LOC100133091
17	44947008	44948300	1293	*	.	1000	17.2731	4104.02	4099.8	796	Promoter (<=1kb)	462	44924709	44947637	22929	2	ENSG00000186185	ENST00000587309	0	146909	KIF18B	kinesin family member 18B
15	97960176	97961111	936	*	.	1000	19.1969	4103.85	4099.63	295	Promoter (<=1kb)	460	97960703	97973833	13131	1	ENSG00000140450	ENST00000268042	0	91947	ARRDC4	arrestin domain containing 4
17	18260190	18261528	1339	*	.	1000	9.42299	4103.13	4098.91	343	Promoter (<=1kb)	462	18260597	18263546	2950	1	ENSG00000177427	ENST00000578174	0	125170	MIEF2	mitochondrial elongation factor 2
1	161225394	161226379	986	*	.	1000	16.4852	4101.62	4097.4	426	Promoter (<=1kb)	446	161225939	161230744	4806	1	ENSG00000158882	ENST00000545897	0	84134	TOMM40L	translocase of outer mitochondrial membrane 40 like
11	13462396	13464017	1622	*	.	1000	17.4233	4099.98	4095.76	867	Promoter (<=1kb)	456	13388008	13463222	75215	2	ENSG00000148925	ENST00000278174	0	84280	BTBD10	BTB domain containing 10
7	4744423	4745815	1393	*	.	1000	13.25	4099.69	4095.47	832	Intron (ENST00000328914/ENSG00000164916, intron 2 of 8)	452	4740859	4755051	14193	1	ENSG00000164916	ENST00000460979	3564	221937	FOXK1	forkhead box K1
5	69217559	69218552	994	*	.	1000	15.2778	4099.39	4095.18	675	Promoter (<=1kb)	450	69217760	69230158	12399	1	ENSG00000134056	ENST00000256441	0	92259	MRPS36	mitochondrial ribosomal protein S36
17	996433	997598	1166	*	.	1000	16.4515	4099	4094.78	339	Promoter (<=1kb)	462	997129	1003671	6543	1	ENSG00000177370	ENST00000327158	0	29928	TIMM22	translocase of inner mitochondrial membrane 22
17	7251425	7252938	1514	*	.	1000	15.0706	4098.78	4094.56	619	Promoter (<=1kb)	462	7251739	7259931	8193	1	ENSG00000170291	ENST00000356683	0	23587	ELP5	elongator acetyltransferase complex subunit 5
20	56391552	56392976	1425	*	.	1000	18.4905	4098.76	4094.54	813	Promoter (<=1kb)	465	56369389	56392295	22907	2	ENSG00000087586	ENST00000395914	0	6790	AURKA	aurora kinase A
1	20661035	20662350	1316	*	.	1000	17.7932	4098.75	4094.54	561	Promoter (<=1kb)	446	20651767	20661544	9778	2	ENSG00000244038	ENST00000415136	0	1650	DDOST	dolichyl-diphosphooligosaccharide--protein glycosyltransferase non-catalytic subunit
10	45672155	45673238	1084	*	.	1000	18.2387	4098.13	4093.91	576	Promoter (<=1kb)	455	45615500	45672772	57273	2	ENSG00000172671	ENST00000344646	0	93550	ZFAND4	zinc finger AN1-type containing 4
9	26955884	26957064	1181	*	.	1000	25.1858	4097.75	4093.54	489	Promoter (<=1kb)	454	26956350	27062884	106535	1	ENSG00000096872	ENST00000648373	0	80173	IFT74	intraflagellar transport 74
17	68247225	68248721	1497	*	.	1000	16.9493	4096.8	4092.58	690	Promoter (<=1kb)	462	68247930	68251178	3249	1	ENSG00000196704	ENST00000580548	0	51321	AMZ2	archaelysin family metallopeptidase 2
X	150982691	150983459	769	*	.	1000	21.2875	4096.74	4092.53	576	Promoter (<=1kb)	468	150983335	150990771	7437	1	ENSG00000029993	ENST00000325307	0	3149	HMGB3	high mobility group box 3
19	48835729	48837830	2102	*	.	1000	13.3972	4096.67	4092.46	1527	Promoter (<=1kb)	464	48813018	48836491	23474	2	ENSG00000087076	ENST00000263278	0	51171	HSD17B14	hydroxysteroid 17-beta dehydrogenase 14
5	138212855	138214253	1399	*	.	1000	17.268	4095.14	4090.93	767	Promoter (<=1kb)	450	138187650	138213323	25674	2	ENSG00000094880	ENST00000394886	0	8697	CDC23	cell division cycle 23
4	86593716	86595388	1673	*	.	1000	16.4218	4092.82	4088.61	572	Promoter (<=1kb)	449	86013874	86594625	580752	2	ENSG00000109339	ENST00000641051	0	5602	MAPK10	mitogen-activated protein kinase 10
8	98116562	98117968	1407	*	.	1000	18.4216	4092.26	4088.05	619	Promoter (<=1kb)	453	98117293	98159835	42543	1	ENSG00000104356	ENST00000401707	0	10940	POP1	POP1 homolog, ribonuclease P/MRP subunit
7	102589812	102590505	694	*	.	1000	9.09862	4091.11	4086.9	221	Promoter (1-2kb)	452	102587447	102592323	4877	2	ENSG00000105808	ENST00000521822	1818	10156	RASA4	RAS p21 protein activator 4
17	38296417	38297867	1451	*	.	1000	19.0064	4090.56	4086.35	722	Promoter (<=1kb)	462	38297023	38323217	26195	1	ENSG00000278845	ENST00000619548	0	84311	MRPL45	mitochondrial ribosomal protein L45
1	167553049	167554321	1273	*	.	1000	20.7001	4088.99	4084.78	774	Promoter (<=1kb)	446	167529117	167553805	24689	2	ENSG00000143162	ENST00000466652	0	8804	CREG1	cellular repressor of E1A stimulated genes 1
10	86520886	86522413	1528	*	.	1000	15.6978	4086.47	4082.26	944	Promoter (<=1kb)	455	86435256	86521792	86537	2	ENSG00000062650	ENST00000298767	0	23063	WAPL	WAPL cohesin release factor
11	47176378	47178024	1647	*	.	1000	13.9497	4086.33	4082.12	579	Promoter (<=1kb)	456	47164299	47177125	12827	2	ENSG00000149182	ENST00000426335	0	84364	ARFGAP2	ADP ribosylation factor GTPase activating protein 2
19	48568179	48569048	870	*	.	1000	13.1371	4085.88	4081.67	414	Intron (ENST00000201586/ENSG00000088002, intron 1 of 6)	464	48575540	48599425	23886	1	ENSG00000088002	ENST00000323090	-6492	6820	SULT2B1	sulfotransferase family 2B member 1
9	125745801	125746912	1112	*	.	1000	16.384	4084.02	4079.81	402	Promoter (<=1kb)	454	125744347	125746552	2206	2	ENSG00000229582	ENST00000606827	0	NA	NA	NA
5	96661842	96663504	1663	*	.	1000	10.2614	4083.96	4079.75	305	Promoter (<=1kb)	450	96662055	96755143	93089	1	ENSG00000153113	ENST00000675107	0	831	CAST	calpastatin
17	67717344	67718701	1358	*	.	1000	18.4453	4081.11	4076.9	362	Promoter (<=1kb)	462	67717931	67722628	4698	1	ENSG00000130935	ENST00000581106	0	25926	NOL11	nucleolar protein 11
19	4968533	4969224	692	*	.	1000	15.0983	4080.3	4076.1	236	Promoter (<=1kb)	464	4969113	5153595	184483	1	ENSG00000127663	ENST00000611640	0	23030	KDM4B	lysine demethylase 4B
7	94300832	94301891	1060	*	.	1000	22.6145	4078.77	4074.56	353	Intron (ENST00000642601/ENSG00000285090, intron 7 of 8)	452	94311138	94347063	35926	1	ENSG00000285964	ENST00000649265	-9247	NA	NA	NA
11	18526291	18527735	1445	*	.	1000	16.4955	4078.63	4074.42	648	Promoter (<=1kb)	456	18468336	18526951	58616	2	ENSG00000074319	ENST00000536719	0	7251	TSG101	tumor susceptibility 101
14	65101683	65103687	2005	*	.	1000	13.9489	4078.04	4073.84	904	Promoter (<=1kb)	459	65006174	65102387	96214	2	ENSG00000125952	ENST00000341653	0	4149	MAX	MYC associated factor X
11	74948590	74949608	1019	*	.	1000	20.5767	4076.88	4072.67	577	Promoter (<=1kb)	456	74949261	74977156	27896	1	ENSG00000118363	ENST00000530257	0	9789	SPCS2	signal peptidase complex subunit 2
19	45455425	45456574	1150	*	.	1000	10.8132	4076.43	4072.22	410	Intron (ENST00000423698/ENSG00000012061, intron 1 of 8)	464	45413963	45450725	36763	2	ENSG00000012061	ENST00000592083	-4700	2067	ERCC1	ERCC excision repair 1, endonuclease non-catalytic subunit
7	75156263	75157842	1580	*	.	1000	14.6138	4075.92	4071.71	725	Exon (ENST00000438382/ENSG00000165178, exon 10 of 11)	452	75156639	75172044	15406	2	ENSG00000165178	ENST00000438382	14202	654817	NCF1C	neutrophil cytosolic factor 1C pseudogene
17	45341395	45342369	975	*	.	1000	18.2684	4075.81	4071.61	504	Distal Intergenic	462	45327366	45327497	132	2	ENSG00000199953	ENST00000363083	-13898	106481745	RNA5SP443	RNA, 5S ribosomal pseudogene 443
5	35617328	35618557	1230	*	.	1000	19.6728	4075.61	4071.41	501	Promoter (<=1kb)	450	35617844	35671575	53732	1	ENSG00000152582	ENST00000282469	0	79925	SPEF2	sperm flagellar 2
17	75456123	75457592	1470	*	.	1000	17.4399	4074.43	4070.23	412	Promoter (<=1kb)	462	75456635	75500452	43818	1	ENSG00000177728	ENST00000314256	0	9772	TMEM94	transmembrane protein 94
9	15306153	15307896	1744	*	.	1000	17.1775	4073.75	4069.54	1128	Promoter (<=1kb)	454	15163622	15307360	143739	2	ENSG00000155158	ENST00000512701	0	158219	TTC39B	tetratricopeptide repeat domain 39B
17	73091881	73093103	1223	*	.	1000	18.9396	4073.32	4069.12	875	Promoter (<=1kb)	462	72645949	73092688	446740	2	ENSG00000133195	ENST00000255559	0	201266	SLC39A11	solute carrier family 39 member 11
2	135530451	135532168	1718	*	.	1000	10.9185	4072.47	4068.27	439	Promoter (<=1kb)	447	135531455	135602670	71216	1	ENSG00000048991	ENST00000483021	0	23518	R3HDM1	R3H domain containing 1
12	71754170	71755830	1661	*	.	1000	19.6471	4072.24	4068.04	594	Promoter (<=1kb)	457	71754863	71800286	45424	1	ENSG00000080371	ENST00000261263	0	23011	RAB21	RAB21, member RAS oncogene family
17	15998526	16000462	1937	*	.	1000	14.9043	4071.05	4066.85	1243	Promoter (<=1kb)	462	15999784	16004251	4468	1	ENSG00000011295	ENST00000466729	0	54902	TTC19	tetratricopeptide repeat domain 19
14	20468846	20470754	1909	*	.	1000	16.4782	4070.8	4066.6	537	Promoter (<=1kb)	459	20468954	20474571	5618	1	ENSG00000198805	ENST00000553418	0	4860	PNP	purine nucleoside phosphorylase
7	135976679	135978189	1511	*	.	1000	19.6373	4069.53	4065.32	774	Promoter (<=1kb)	452	135926760	135977359	50600	2	ENSG00000105887	ENST00000393085	0	136319	MTPN	myotrophin
8	144852227	144853661	1435	*	.	1000	16.5767	4069.25	4065.05	854	Promoter (<=1kb)	453	144850166	144853067	2902	2	ENSG00000170619	ENST00000402718	0	28991	COMMD5	COMM domain containing 5
12	9283377	9285003	1627	*	.	1000	19.4078	4067.25	4063.05	611	Promoter (1-2kb)	457	9286673	9286822	150	2	ENSG00000212440	ENST00000391138	1819	NA	NA	NA
12	56635871	56637294	1424	*	.	1000	8.98291	4067.12	4062.92	531	Promoter (<=1kb)	457	56595596	56636366	40771	2	ENSG00000076108	ENST00000379441	0	11176	BAZ2A	bromodomain adjacent to zinc finger domain 2A
2	61470450	61471886	1437	*	.	1000	10.9079	4066.82	4062.62	723	Promoter (<=1kb)	447	61187463	61471087	283625	2	ENSG00000115464	ENST00000398571	0	9736	USP34	ubiquitin specific peptidase 34
14	23006623	23007449	827	*	.	1000	16.201	4066.43	4062.23	582	Promoter (<=1kb)	459	22999121	23007123	8003	2	ENSG00000100802	ENST00000556896	0	60686	C14orf93	chromosome 14 open reading frame 93
3	49939689	49940770	1082	*	.	1000	18.1133	4064.96	4060.76	340	Promoter (<=1kb)	448	49940007	50077249	137243	1	ENSG00000004534	ENST00000442092	0	10180	RBM6	RNA binding motif protein 6
11	125591766	125593469	1704	*	.	1000	17.1788	4063.98	4059.79	898	Promoter (<=1kb)	456	125592819	125609898	17080	1	ENSG00000134910	ENST00000534472	0	3703	STT3A	STT3 oligosaccharyltransferase complex catalytic subunit A
1	9910053	9911311	1259	*	.	1000	18.8268	4063.48	4059.28	547	Promoter (<=1kb)	446	9848276	9910269	61994	2	ENSG00000178585	ENST00000377263	0	56998	CTNNBIP1	catenin beta interacting protein 1
8	69994046	69995154	1109	*	.	1000	24.5883	4062.76	4058.56	705	Distal Intergenic	453	69987415	69987697	283	2	ENSG00000253721	ENST00000520803	-6349	NA	NA	NA
2	241686310	241687835	1526	*	.	1000	16.8645	4061.18	4056.98	533	Promoter (<=1kb)	447	241675747	241686815	11069	2	ENSG00000168393	ENST00000305784	0	1841	DTYMK	deoxythymidylate kinase
1	117059398	117060987	1590	*	.	1000	16.8265	4060.69	4056.49	774	Promoter (<=1kb)	446	117060326	117107453	47128	1	ENSG00000116830	ENST00000369466	0	8458	TTF2	transcription termination factor 2
1	155261446	155262790	1345	*	.	1000	17.0919	4060.36	4056.17	911	Promoter (<=1kb)	446	155255981	155262360	6380	2	ENSG00000116521	ENST00000302631	0	10067	SCAMP3	secretory carrier membrane protein 3
19	40714817	40715428	612	*	.	1000	7.40484	4060.25	4056.05	314	Promoter (<=1kb)	464	40691514	40714938	23425	2	ENSG00000123815	ENST00000594490	0	79934	COQ8B	coenzyme Q8B
5	65562654	65563693	1040	*	.	1000	23.4423	4059.82	4055.62	531	Promoter (<=1kb)	450	65563236	65568079	4844	1	ENSG00000113593	ENST00000508982	0	23398	PPWD1	peptidylprolyl isomerase domain and WD repeat containing 1
2	42360869	42361982	1114	*	.	1000	15.5168	4059.68	4055.49	661	Promoter (<=1kb)	447	42333546	42361149	27604	2	ENSG00000115944	ENST00000468711	0	9167	COX7A2L	cytochrome c oxidase subunit 7A2 like
12	74537265	74538454	1190	*	.	1000	18.0951	4059.59	4055.39	552	Promoter (<=1kb)	457	74537835	74545430	7596	1	ENSG00000253719	ENST00000519948	0	552889	ATXN7L3B	ataxin 7 like 3B
15	88638093	88639665	1573	*	.	1000	11.3749	4058.79	4054.59	779	Promoter (<=1kb)	460	88638953	88655531	16579	1	ENSG00000172183	ENST00000559876	0	3669	ISG20	interferon stimulated exonuclease gene 20
10	90871278	90872644	1367	*	.	1000	21.549	4058.77	4054.57	654	Promoter (<=1kb)	455	90871952	90903262	31311	1	ENSG00000148688	ENST00000413330	0	10556	RPP30	ribonuclease P/MRP subunit p30
10	124418191	124419560	1370	*	.	1000	15.802	4056.07	4051.88	859	Promoter (<=1kb)	455	124397303	124418923	21621	2	ENSG00000065154	ENST00000368845	0	4942	OAT	ornithine aminotransferase
1	162790280	162791383	1104	*	.	1000	21.7639	4054.79	4050.6	324	Promoter (<=1kb)	446	162790702	162812817	22116	1	ENSG00000132196	ENST00000485405	0	51478	HSD17B7	hydroxysteroid 17-beta dehydrogenase 7
19	58451018	58452319	1302	*	.	1000	16.9096	4050.2	4046.01	546	Promoter (<=1kb)	464	58451611	58457132	5522	1	ENSG00000249471	ENST00000545523	0	388569	ZNF324B	zinc finger protein 324B
17	7856597	7858747	2151	*	.	1000	9.51021	4048.59	4044.4	1009	Promoter (<=1kb)	462	7857746	7860474	2729	1	ENSG00000182224	ENST00000571846	0	124637	CYB5D1	cytochrome b5 domain containing 1
1	151346692	151347839	1148	*	.	1000	17.8781	4047.63	4043.44	634	Promoter (<=1kb)	446	151340640	151347251	6612	2	ENSG00000143390	ENST00000290524	0	5993	RFX5	regulatory factor X5
12	401143	402067	925	*	.	1000	20.5115	4047.55	4043.36	399	Promoter (<=1kb)	457	401637	442642	41006	1	ENSG00000120647	ENST00000412006	0	84318	CCDC77	coiled-coil domain containing 77
11	59106301	59107744	1444	*	.	1000	16.4803	4045.99	4041.79	791	Promoter (<=1kb)	456	59107185	59127410	20226	1	ENSG00000189057	ENST00000411426	0	374393	FAM111B	FAM111 trypsin like peptidase B
2	27211295	27213084	1790	*	.	1000	11.867	4045.86	4041.67	1014	Promoter (<=1kb)	447	27199587	27212268	12682	2	ENSG00000138074	ENST00000310574	0	8884	SLC5A6	solute carrier family 5 member 6
1	186679977	186681373	1397	*	.	1000	18.6562	4045.83	4041.64	378	Promoter (<=1kb)	446	186671791	186680423	8633	2	ENSG00000073756	ENST00000367468	0	5743	PTGS2	prostaglandin-endoperoxide synthase 2
7	134127005	134128032	1028	*	.	1000	25.2022	4045.72	4041.53	338	Promoter (<=1kb)	452	134127299	134210256	82958	1	ENSG00000155530	ENST00000645682	0	136332	LRGUK	leucine rich repeats and guanylate kinase domain containing
17	59330426	59331886	1461	*	.	1000	15.1531	4045.44	4041.25	1172	Promoter (<=1kb)	462	59331655	59401729	70075	1	ENSG00000175155	ENST00000312655	0	388403	YPEL2	yippee like 2
17	49707340	49708649	1310	*	.	1000	17.8267	4043.63	4039.44	906	Promoter (<=1kb)	462	49700934	49707951	7018	2	ENSG00000121073	ENST00000649906	0	10237	SLC35B1	solute carrier family 35 member B1
11	10735457	10736674	1218	*	.	1000	20.5126	4043.15	4038.96	453	Distal Intergenic	456	10725903	10726004	102	1	ENSG00000206858	ENST00000384131	9554	NA	NA	NA
X	48521000	48522601	1602	*	.	1000	21.1379	4041.71	4037.52	766	Promoter (<=1kb)	468	48521799	48528710	6912	1	ENSG00000147155	ENST00000276096	0	10682	EBP	EBP cholestenol delta-isomerase
3	50291679	50293079	1401	*	.	1000	16.2626	4041.33	4037.14	829	Promoter (<=1kb)	448	50287732	50292429	4698	2	ENSG00000214706	ENST00000417626	0	7866	IFRD2	interferon related developmental regulator 2
19	47112097	47114045	1949	*	.	1000	11.4257	4041.21	4037.02	1213	Promoter (<=1kb)	464	47064187	47113776	49590	2	ENSG00000130749	ENST00000253048	0	23211	ZC3H4	zinc finger CCCH-type containing 4
17	17010025	17011796	1772	*	.	1000	11.057	4039.09	4034.9	729	Distal Intergenic	462	17011914	17014990	3077	2	ENSG00000260328	ENST00000562897	3194	NA	NA	NA
17	38798807	38800387	1581	*	.	1000	14.0314	4039.08	4034.89	1220	Promoter (<=1kb)	462	38765691	38799556	33866	2	ENSG00000276293	ENST00000619039	0	8396	PIP4K2B	phosphatidylinositol-5-phosphate 4-kinase type 2 beta
16	18800763	18802227	1465	*	.	1000	13.8428	4037.47	4033.29	891	Promoter (<=1kb)	461	18791669	18801549	9881	2	ENSG00000170540	ENST00000304414	0	23204	ARL6IP1	ADP ribosylation factor like GTPase 6 interacting protein 1
3	43769293	43771109	1817	*	.	1000	19.2537	4036.27	4032.08	435	Distal Intergenic	448	43778961	43779982	1022	2	ENSG00000235886	ENST00000432423	8873	NA	NA	NA
22	41285431	41286967	1537	*	.	1000	15.6677	4035.91	4031.72	921	Promoter (<=1kb)	467	41244779	41286187	41409	2	ENSG00000100401	ENST00000356244	0	5905	RANGAP1	Ran GTPase activating protein 1
1	247210152	247211143	992	*	.	1000	21.736	4035.84	4031.66	753	Promoter (<=1kb)	446	247199399	247210856	11458	2	ENSG00000227671	ENST00000606173	0	NA	NA	NA
11	65381716	65383256	1541	*	.	1000	10.051	4034.73	4030.54	693	Promoter (<=1kb)	456	65375192	65382007	6816	2	ENSG00000162241	ENST00000527174	0	283130	SLC25A45	solute carrier family 25 member 45
2	189673782	189675188	1407	*	.	1000	18.3301	4033.85	4029.67	752	Promoter (<=1kb)	447	189674290	189761193	86904	1	ENSG00000151687	ENST00000441800	0	150709	ANKAR	ankyrin and armadillo repeat containing
14	70808202	70810246	2045	*	.	1000	13.3797	4033.57	4029.38	1609	Promoter (<=1kb)	459	70722526	70809513	86988	2	ENSG00000006432	ENST00000554752	0	4293	MAP3K9	mitogen-activated protein kinase kinase kinase 9
5	31531452	31533290	1839	*	.	1000	17.6561	4033.04	4028.85	751	Promoter (<=1kb)	450	31532287	31554808	22522	1	ENSG00000082213	ENST00000510659	0	55322	C5orf22	chromosome 5 open reading frame 22
17	75152983	75155376	2394	*	.	1000	12.9806	4032.83	4028.65	1663	Promoter (<=1kb)	462	75135248	75154243	18996	2	ENSG00000189159	ENST00000476258	0	51155	JPT1	Jupiter microtubule associated homolog 1
8	38104595	38106230	1636	*	.	1000	14.6111	4031.42	4027.23	1234	Promoter (<=1kb)	453	38105493	38140080	34588	1	ENSG00000129691	ENST00000545394	0	9070	ASH2L	ASH2 like, histone lysine methyltransferase complex subunit
7	91940109	91941740	1632	*	.	1000	17.9793	4030.9	4026.71	689	Promoter (<=1kb)	452	91940840	92110673	169834	1	ENSG00000127914	ENST00000680072	0	10142	AKAP9	A-kinase anchoring protein 9
1	193121476	193122738	1263	*	.	1000	14.5356	4030.15	4025.97	561	Promoter (<=1kb)	446	193121983	193237693	115711	1	ENSG00000134371	ENST00000649895	0	79577	CDC73	cell division cycle 73
20	34362461	34363960	1500	*	.	1000	21.0931	4028.7	4024.52	782	Promoter (<=1kb)	465	34363241	34413879	50639	1	ENSG00000078747	ENST00000486883	0	83737	ITCH	itchy E3 ubiquitin protein ligase
9	36764905	36766507	1603	*	.	1000	17.7608	4027.93	4023.75	1206	Promoter (<=1kb)	454	36765509	36777347	11839	1	ENSG00000288571	ENST00000656722	0	NA	NA	NA
20	2651755	2653296	1542	*	.	1000	13.5426	4023.46	4019.28	713	Promoter (<=1kb)	465	2652593	2658039	5447	1	ENSG00000101361	ENST00000651302	0	10528	NOP56	NOP56 ribonucleoprotein
19	19385155	19386012	858	*	.	1000	18.2018	4022.73	4018.55	552	Promoter (<=1kb)	464	19385826	19465577	79752	1	ENSG00000167491	ENST00000494516	0	54815	GATAD2A	GATA zinc finger domain containing 2A
11	77191330	77192510	1181	*	.	1000	15.9877	4021.5	4017.31	814	Exon (ENST00000409709/ENSG00000137474, exon 31 of 49)	456	77184686	77191187	6502	1	ENSG00000137474	ENST00000467137	6644	4647	MYO7A	myosin VIIA
3	19946512	19948147	1636	*	.	1000	13.7089	4019.72	4015.54	602	Promoter (<=1kb)	448	19947097	19985175	38079	1	ENSG00000144566	ENST00000273047	0	5868	RAB5A	RAB5A, member RAS oncogene family
11	12109679	12111733	2055	*	.	1000	15.9096	4019.37	4015.19	776	Promoter (<=1kb)	456	12110590	12263785	153196	1	ENSG00000133816	ENST00000683283	0	9645	MICAL2	microtubule associated monooxygenase, calponin and LIM domain containing 2
X	78103635	78105159	1525	*	.	1000	16.823	4018.57	4014.39	504	Promoter (<=1kb)	468	78104248	78129295	25048	1	ENSG00000102144	ENST00000373316	0	5230	PGK1	phosphoglycerate kinase 1
14	36661457	36663061	1605	*	.	1000	16.9364	4018.13	4013.95	356	Promoter (<=1kb)	459	36661860	36679362	17503	1	ENSG00000198807	ENST00000361487	0	5083	PAX9	paired box 9
1	183635101	183636496	1396	*	.	1000	13.8395	4017.76	4013.57	690	Promoter (<=1kb)	446	183636085	183928531	292447	1	ENSG00000143344	ENST00000304685	0	23179	RGL1	ral guanine nucleotide dissociation stimulator like 1
7	76379659	76380655	997	*	.	1000	13.4495	4016.87	4012.69	391	Distal Intergenic	452	76389334	76393490	4157	2	ENSG00000146700	ENST00000492979	12835	136853	SSC4D	scavenger receptor cysteine rich family member with 4 domains
17	60390949	60392926	1978	*	.	1000	12.6083	4015.9	4011.72	1334	Promoter (<=1kb)	462	60392429	60425871	33443	1	ENSG00000141371	ENST00000461535	0	124773	C17orf64	chromosome 17 open reading frame 64
4	39527103	39528381	1279	*	.	1000	12.4727	4012.03	4007.85	492	Promoter (<=1kb)	449	39498755	39527439	28685	2	ENSG00000109814	ENST00000316423	0	7358	UGDH	UDP-glucose 6-dehydrogenase
11	27471046	27473458	2413	*	.	1000	13.2119	4011.81	4007.63	1839	Promoter (<=1kb)	456	27365961	27472775	106815	2	ENSG00000205213	ENST00000389858	0	55366	LGR4	leucine rich repeat containing G protein-coupled receptor 4
1	161749397	161750510	1114	*	.	1000	17.012	4011.45	4007.27	351	Promoter (<=1kb)	446	161749758	161757238	7481	1	ENSG00000081721	ENST00000484291	0	11266	DUSP12	dual specificity phosphatase 12
10	102917172	102918676	1505	*	.	1000	11.8344	4010.93	4006.75	1021	Promoter (<=1kb)	455	102918294	103090222	171929	1	ENSG00000148842	ENST00000369878	0	54805	CNNM2	cyclin and CBS domain divalent metal cation transport mediator 2
15	56886542	56887967	1426	*	.	1000	15.6599	4010.42	4006.25	671	Promoter (<=1kb)	460	56887107	56888219	1113	1	ENSG00000276524	ENST00000621974	0	NA	NA	NA
17	58218537	58219682	1146	*	.	1000	21.3542	4010.08	4005.9	833	Promoter (<=1kb)	462	58205441	58219245	13805	2	ENSG00000011143	ENST00000678568	0	54903	MKS1	MKS transition zone complex subunit 1
19	55598819	55600364	1546	*	.	1000	10.8982	4009.33	4005.15	864	Promoter (<=1kb)	464	55600022	55602503	2482	1	ENSG00000171443	ENST00000589521	0	147807	ZNF524	zinc finger protein 524
8	74349950	74351051	1102	*	.	1000	25.013	4009.22	4005.04	469	Promoter (<=1kb)	453	74350108	74366852	16745	1	ENSG00000104381	ENST00000674806	0	54332	GDAP1	ganglioside induced differentiation associated protein 1
17	48100491	48101988	1498	*	.	1000	15.1742	4008.84	4004.67	1014	Promoter (<=1kb)	462	48070052	48101198	31147	2	ENSG00000108468	ENST00000393408	0	10951	CBX1	chromobox 1
9	6757012	6759289	2278	*	.	1000	12.2405	4008.76	4004.58	631	Promoter (<=1kb)	454	6757641	7014337	256697	1	ENSG00000107077	ENST00000438023	0	23081	KDM4C	lysine demethylase 4C
10	89251183	89252253	1071	*	.	1000	18.8702	4006.55	4002.38	824	Promoter (<=1kb)	455	89213572	89251775	38204	2	ENSG00000107798	ENST00000336233	0	3988	LIPA	lipase A, lysosomal acid type
9	79570342	79572067	1726	*	.	1000	11.1287	4005.53	4001.35	1429	Promoter (<=1kb)	454	79571773	79726882	155110	1	ENSG00000106829	ENST00000376544	0	7091	TLE4	TLE family member 4, transcriptional corepressor
6	52994621	52996348	1728	*	.	1000	19.4124	4004.62	4000.44	692	Promoter (<=1kb)	451	52977953	52995284	17332	2	ENSG00000170899	ENST00000370963	0	2941	GSTA4	glutathione S-transferase alpha 4
19	39397350	39398868	1519	*	.	1000	8.01037	4002.82	3998.65	485	3' UTR	464	39402842	39404200	1359	1	ENSG00000288919	ENST00000687686	-3974	NA	NA	NA
11	73787237	73788803	1567	*	.	1000	19.8013	4002.26	3998.09	892	Promoter (<=1kb)	456	73787872	73865133	77262	1	ENSG00000175581	ENST00000508278	0	51642	MRPL48	mitochondrial ribosomal protein L48
15	72685639	72686826	1188	*	.	1000	16.9678	4002.15	3997.98	539	Promoter (<=1kb)	460	72686179	72738475	52297	1	ENSG00000140463	ENST00000395205	0	585	BBS4	Bardet-Biedl syndrome 4
11	3056521	3057999	1479	*	.	1000	17.9782	4002.06	3997.89	990	Promoter (<=1kb)	456	3000922	3057437	56516	2	ENSG00000110619	ENST00000531387	0	833	CARS1	cysteinyl-tRNA synthetase 1
16	69726288	69727496	1209	*	.	1000	10.5853	4001.53	3997.35	278	Promoter (<=1kb)	461	69706996	69726506	19511	2	ENSG00000181019	ENST00000561500	0	1728	NQO1	NAD(P)H quinone dehydrogenase 1
9	2014640	2015691	1052	*	.	1000	10.7699	4001.27	3997.09	539	Promoter (<=1kb)	454	2015186	2193620	178435	1	ENSG00000080503	ENST00000357248	0	6595	SMARCA2	SWI/SNF related, matrix associated, actin dependent regulator of chromatin, subfamily a, member 2
12	110613519	110614624	1106	*	.	1000	18.8297	4000.73	3996.55	530	Promoter (<=1kb)	457	110614027	110630287	16261	1	ENSG00000204852	ENST00000550703	0	79600	TCTN1	tectonic family member 1
17	42608803	42610711	1909	*	.	1000	12.5778	4000.56	3996.39	813	Promoter (<=1kb)	462	42609641	42615224	5584	1	ENSG00000131462	ENST00000681490	0	7283	TUBG1	tubulin gamma 1
7	66627943	66629348	1406	*	.	1000	14.2306	4000.28	3996.11	914	Promoter (<=1kb)	452	66628881	66643047	14167	1	ENSG00000243335	ENST00000639828	0	154881	KCTD7	potassium channel tetramerization domain containing 7
19	39480236	39481805	1570	*	.	1000	14.8911	4000.04	3995.87	574	Promoter (<=1kb)	464	39480412	39490888	10477	1	ENSG00000105197	ENST00000544017	0	92609	TIMM50	translocase of inner mitochondrial membrane 50
17	78839758	78841737	1980	*	.	1000	12.2165	3999.38	3995.21	1080	Promoter (<=1kb)	462	78787467	78840780	53314	2	ENSG00000055483	ENST00000589225	0	57602	USP36	ubiquitin specific peptidase 36
18	11980340	11982211	1872	*	.	1000	13.4224	3998.58	3994.41	761	Promoter (<=1kb)	463	11981025	12028118	47094	1	ENSG00000141401	ENST00000588752	0	3613	IMPA2	inositol monophosphatase 2
20	45856717	45858003	1287	*	.	1000	20.9965	3998.47	3994.3	754	Promoter (<=1kb)	465	45841721	45857392	15672	2	ENSG00000101473	ENST00000217455	0	10005	ACOT8	acyl-CoA thioesterase 8
1	211674998	211676297	1300	*	.	1000	17.6538	3996.78	3992.61	686	Promoter (<=1kb)	446	211658657	211675630	16974	2	ENSG00000117650	ENST00000540251	0	4751	NEK2	NIMA related kinase 2
5	148825784	148827134	1351	*	.	1000	16.5801	3996.64	3992.47	681	Promoter (<=1kb)	450	148826611	148828623	2013	1	ENSG00000169252	ENST00000305988	0	154	ADRB2	adrenoceptor beta 2
2	130355193	130356629	1437	*	.	1000	14.9318	3996.58	3992.41	786	Promoter (<=1kb)	447	130356045	130374571	18527	1	ENSG00000072135	ENST00000347849	0	26469	PTPN18	protein tyrosine phosphatase non-receptor type 18
12	32754965	32756138	1174	*	.	1000	16.3683	3996.57	3992.4	976	Promoter (<=1kb)	457	32746544	32755897	9354	2	ENSG00000139131	ENST00000324868	0	51067	YARS2	tyrosyl-tRNA synthetase 2
9	78235434	78236897	1464	*	.	1000	17.9718	3996.3	3992.13	652	Promoter (<=1kb)	454	78236062	78279690	43629	1	ENSG00000148019	ENST00000424347	0	84131	CEP78	centrosomal protein 78
X	46836603	46837719	1117	*	.	1000	18.7951	3995.49	3991.32	250	Promoter (<=1kb)	468	46837043	46882358	45316	1	ENSG00000102218	ENST00000218340	0	6102	RP2	RP2 activator of ARL3 GTPase
2	219497721	219499131	1411	*	.	1000	10.3298	3994.81	3990.64	839	Promoter (<=1kb)	447	219498865	219502441	3577	1	ENSG00000144591	ENST00000684669	0	29926	GMPPA	GDP-mannose pyrophosphorylase A
2	113755662	113757430	1769	*	.	1000	17.7771	3994.46	3990.29	950	Promoter (<=1kb)	447	113706709	113756642	49934	2	ENSG00000115084	ENST00000245680	0	80255	SLC35F5	solute carrier family 35 member F5
19	42423119	42424149	1031	*	.	1000	14.7794	3993.32	3989.15	520	Promoter (<=1kb)	464	42407400	42423222	15823	2	ENSG00000079435	ENST00000602000	0	3991	LIPE	lipase E, hormone sensitive type
1	204515658	204517069	1412	*	.	1000	20.1859	3992.75	3988.58	670	Promoter (<=1kb)	446	204516379	204558119	41741	1	ENSG00000198625	ENST00000367183	0	4194	MDM4	MDM4 regulator of p53
11	125886887	125888588	1702	*	.	1000	14.7575	3991.7	3987.54	685	Promoter (<=1kb)	456	125887668	125900646	12979	1	ENSG00000198331	ENST00000425380	0	219844	HYLS1	HYLS1 centriolar and ciliogenesis associated
15	83010774	83012344	1571	*	.	1000	14.3465	3990.7	3986.53	911	Promoter (<=1kb)	460	82988963	83011607	22645	2	ENSG00000169609	ENST00000538348	0	123207	C15orf40	chromosome 15 open reading frame 40
14	64337810	64339322	1513	*	.	1000	13.0289	3989.86	3985.69	1090	Promoter (<=1kb)	459	64226707	64338096	111390	2	ENSG00000140009	ENST00000554572	0	2100	ESR2	estrogen receptor 2
5	95646374	95647560	1187	*	.	1000	16.5265	3989.31	3985.15	486	Promoter (<=1kb)	450	95646754	95656190	9437	1	ENSG00000175449	ENST00000511684	0	317671	RFESD	Rieske Fe-S domain containing
17	56698710	56699936	1227	*	.	1000	19.4599	3989.05	3984.88	967	Distal Intergenic	462	56791913	56795292	3380	2	ENSG00000214226	ENST00000570754	95356	339210	C17orf67	chromosome 17 open reading frame 67
20	59031811	59033080	1270	*	.	1000	20.1413	3986.87	3982.71	673	Promoter (<=1kb)	465	59025475	59032335	6861	2	ENSG00000124172	ENST00000243997	0	514	ATP5F1E	ATP synthase F1 subunit epsilon
2	177212099	177213496	1398	*	.	1000	12.516	3986.51	3982.35	440	Promoter (<=1kb)	447	177212563	177220085	7523	1	ENSG00000170144	ENST00000392524	0	220988	HNRNPA3	heterogeneous nuclear ribonucleoprotein A3
10	46377524	46378679	1156	*	.	1000	12.3722	3986.46	3982.3	716	Promoter (1-2kb)	455	46375776	46391778	16003	1	ENSG00000264230	ENST00000619162	1748	728113	ANXA8L1	annexin A8 like 1
8	30081942	30083584	1643	*	.	1000	16.1306	3986.19	3982.03	1130	Promoter (<=1kb)	453	30063003	30083064	20062	2	ENSG00000133872	ENST00000256255	0	51669	SARAF	store-operated calcium entry associated regulatory factor
6	7389251	7390459	1209	*	.	1000	20.5581	3985.19	3981.02	492	Promoter (<=1kb)	451	7389793	7402848	13056	1	ENSG00000124784	ENST00000475351	0	83732	RIOK1	RIO kinase 1
17	44070326	44071415	1090	*	.	1000	11.2525	3984.58	3980.41	405	Promoter (<=1kb)	462	44070735	44076344	5610	1	ENSG00000141349	ENST00000269097	0	92579	G6PC3	glucose-6-phosphatase catalytic subunit 3
8	134712131	134713753	1623	*	.	1000	15.865	3984.22	3980.05	951	Promoter (<=1kb)	453	134477788	134713031	235244	2	ENSG00000066827	ENST00000377838	0	57623	ZFAT	zinc finger and AT-hook domain containing
15	76310797	76312051	1255	*	.	1000	12.04	3983.41	3979.24	682	Promoter (<=1kb)	460	76188555	76311475	122921	2	ENSG00000140374	ENST00000690610	0	2108	ETFA	electron transfer flavoprotein subunit alpha
1	11262108	11263000	893	*	.	1000	20.6748	3982.94	3978.78	521	Promoter (<=1kb)	446	11106535	11262551	156017	2	ENSG00000198793	ENST00000361445	0	2475	MTOR	mechanistic target of rapamycin kinase
20	3846106	3847702	1597	*	.	1000	16.5772	3982.5	3978.33	681	Promoter (<=1kb)	465	3846799	3876123	29325	1	ENSG00000088888	ENST00000416600	0	57506	MAVS	mitochondrial antiviral signaling protein
12	948748	950289	1542	*	.	1000	15.0613	3982.35	3978.18	919	Promoter (<=1kb)	457	911736	949694	37959	2	ENSG00000002016	ENST00000358495	0	5893	RAD52	RAD52 homolog, DNA repair protein
8	145002323	145003682	1360	*	.	1000	20.0327	3982.21	3978.04	647	Promoter (<=1kb)	453	144973589	145002894	29306	2	ENSG00000196922	ENST00000426361	0	286101	ZNF252P	zinc finger protein 252, pseudogene
10	74176110	74177398	1289	*	.	1000	16.7834	3981.98	3977.82	604	Promoter (<=1kb)	455	74176551	74709963	533413	1	ENSG00000156110	ENST00000673310	0	132	ADK	adenosine kinase
22	17036654	17038107	1454	*	.	1000	20.8979	3981.73	3977.56	539	Promoter (<=1kb)	467	17037212	17056558	19347	1	ENSG00000237438	ENST00000414401	0	NA	NA	NA
11	66958049	66958983	935	*	.	1000	13.9521	3981.42	3977.25	585	Promoter (<=1kb)	456	66848417	66958383	109967	2	ENSG00000173599	ENST00000529047	0	5091	PC	pyruvate carboxylase
3	43621133	43622814	1682	*	.	1000	17.9186	3981.27	3977.1	1175	Promoter (<=1kb)	448	43365848	43622011	256164	2	ENSG00000160746	ENST00000292246	0	55129	ANO10	anoctamin 10
19	53520408	53521850	1443	*	.	1000	19.0617	3980.67	3976.51	568	Promoter (<=1kb)	464	53520948	53580202	59255	1	ENSG00000130844	ENST00000648236	0	55422	ZNF331	zinc finger protein 331
10	43436112	43437636	1525	*	.	1000	15.2662	3980.3	3976.14	683	Promoter (<=1kb)	455	43436841	43481678	44838	1	ENSG00000243660	ENST00000315429	0	642819	ZNF487	zinc finger protein 487
1	230641888	230643045	1158	*	.	1000	20.1603	3979.7	3975.54	560	Promoter (<=1kb)	446	230642481	230693982	51502	1	ENSG00000135775	ENST00000366669	0	22796	COG2	component of oligomeric golgi complex 2
22	15775657	15776710	1054	*	.	1000	17.8796	3977.88	3973.72	819	Intron (ENST00000453395/ENSG00000225255, intron 2 of 2)	467	15784959	15827434	42476	1	ENSG00000206195	ENST00000413768	-8249	503637	DUXAP8	double homeobox A pseudogene 8
2	55281666	55282995	1330	*	.	1000	17.5045	3977.64	3973.48	574	Promoter (<=1kb)	447	55282319	55284472	2154	1	ENSG00000162997	ENST00000563365	0	344405	PRORSD1P	prolyl-tRNA synthetase associated domain containing 1, pseudogene
19	50510796	50511957	1162	*	.	1000	12.5716	3976.34	3972.18	497	Promoter (<=1kb)	464	50505998	50511162	5165	2	ENSG00000161677	ENST00000601423	0	126119	JOSD2	Josephin domain containing 2
2	128090761	128091766	1006	*	.	1000	18.9804	3975.2	3971.04	341	Promoter (<=1kb)	447	128091200	128108054	16855	1	ENSG00000136731	ENST00000430075	0	56886	UGGT1	UDP-glucose glycoprotein glucosyltransferase 1
2	10122160	10123243	1084	*	.	1000	9.33652	3973.82	3969.66	494	Promoter (<=1kb)	447	10122328	10131418	9091	1	ENSG00000171848	ENST00000360566	0	6241	RRM2	ribonucleotide reductase regulatory subunit M2
12	113184468	113186211	1744	*	.	1000	12.7335	3973.72	3969.56	556	Promoter (<=1kb)	457	113157173	113185478	28306	2	ENSG00000123064	ENST00000306014	0	79039	DDX54	DEAD-box helicase 54
5	177402366	177404769	2404	*	.	1000	10.8824	3973.64	3969.48	1513	Promoter (<=1kb)	450	177402160	177404472	2313	2	ENSG00000131187	ENST00000502854	0	2161	F12	coagulation factor XII
20	25389708	25391298	1591	*	.	1000	16.4811	3973.26	3969.1	1320	Promoter (<=1kb)	465	25294743	25390835	96093	2	ENSG00000100997	ENST00000376542	0	26090	ABHD12	abhydrolase domain containing 12, lysophospholipase
1	235327197	235329440	2244	*	.	1000	12.016	3971.95	3967.79	1149	Promoter (<=1kb)	446	235166895	235327487	160593	2	ENSG00000054267	ENST00000366603	0	51742	ARID4B	AT-rich interaction domain 4B
2	26503016	26504272	1257	*	.	1000	18.0914	3971.93	3967.77	615	Exon (ENST00000272371/ENSG00000115155, exon 6 of 47)	447	26457203	26478124	20922	2	ENSG00000115155	ENST00000339598	-24892	9381	OTOF	otoferlin
11	57711602	57712902	1301	*	.	1000	13.1241	3971.07	3966.91	876	Promoter (<=1kb)	456	57703710	57712215	8506	2	ENSG00000156603	ENST00000431606	0	219541	MED19	mediator complex subunit 19
2	47402468	47404176	1709	*	.	1000	15.2493	3970.23	3966.07	583	Promoter (<=1kb)	447	47403067	47483221	80155	1	ENSG00000095002	ENST00000543555	0	4436	MSH2	mutS homolog 2
14	92039222	92041025	1804	*	.	1000	19.3912	3968.41	3964.25	910	Promoter (<=1kb)	459	91965991	92040059	74069	2	ENSG00000100815	ENST00000267622	0	9321	TRIP11	thyroid hormone receptor interactor 11
12	38316191	38317397	1207	*	.	1000	27.9075	3966.78	3962.62	532	Promoter (<=1kb)	457	38316762	38323982	7221	1	ENSG00000175548	ENST00000551464	0	144245	ALG10B	ALG10 alpha-1,2-glucosyltransferase B
1	244461136	244461964	829	*	.	1000	19.9969	3966.45	3962.29	306	Promoter (<=1kb)	446	244461273	244640504	179232	1	ENSG00000179397	ENST00000366534	0	257044	CATSPERE	catsper channel auxiliary subunit epsilon
11	64268608	64270945	2338	*	.	1000	10.6906	3965.86	3961.7	1492	Promoter (<=1kb)	456	64270062	64288090	18029	1	ENSG00000173264	ENST00000546139	0	56834	GPR137	G protein-coupled receptor 137
7	100851894	100853331	1438	*	.	1000	20.1	3965.27	3961.11	752	Promoter (<=1kb)	452	100852713	100867010	14298	1	ENSG00000146828	ENST00000354161	0	56996	SLC12A9	solute carrier family 12 member 9
11	6480887	6482205	1319	*	.	1000	19.2643	3964.86	3960.7	542	Promoter (<=1kb)	456	6474683	6481479	6797	2	ENSG00000132254	ENST00000614314	0	23647	ARFIP2	ADP ribosylation factor interacting protein 2
17	7035150	7036849	1700	*	.	1000	15.6606	3964.81	3960.65	772	Promoter (<=1kb)	462	7036015	7040117	4103	1	ENSG00000174327	ENST00000308027	0	201232	SLC16A13	solute carrier family 16 member 13
15	69413756	69415175	1420	*	.	1000	14.1637	3963.97	3959.81	521	Promoter (<=1kb)	460	69414246	69448427	34182	1	ENSG00000137807	ENST00000260363	0	9493	KIF23	kinesin family member 23
16	50024692	50025997	1306	*	.	1000	20.4379	3960.08	3955.93	462	Promoter (<=1kb)	461	50025225	50037081	11857	1	ENSG00000205423	ENST00000427478	0	255919	CNEP1R1	CTD nuclear envelope phosphatase 1 regulatory subunit 1
14	103384583	103386425	1843	*	.	1000	16.5263	3959.31	3955.16	717	Promoter (<=1kb)	459	103385377	103503820	118444	1	ENSG00000075413	ENST00000678179	0	4140	MARK3	microtubule affinity regulating kinase 3
2	108533235	108534988	1754	*	.	1000	16.3234	3958.81	3954.66	708	Promoter (<=1kb)	447	108534355	108687238	152884	1	ENSG00000169756	ENST00000544547	0	3987	LIMS1	LIM zinc finger domain containing 1
11	62621379	62622537	1159	*	.	1000	16.0197	3956.23	3952.07	699	Promoter (<=1kb)	456	62615296	62621986	6691	2	ENSG00000149541	ENST00000265471	0	26229	B3GAT3	beta-1,3-glucuronyltransferase 3
2	55268505	55269511	1007	*	.	1000	20.0552	3953.15	3948.99	835	Promoter (<=1kb)	447	55236595	55269231	32637	2	ENSG00000085760	ENST00000263629	0	4528	MTIF2	mitochondrial translational initiation factor 2
14	65411648	65413689	2042	*	.	1000	10.751	3952.3	3948.15	923	Promoter (<=1kb)	459	65411863	65561652	149790	1	ENSG00000033170	ENST00000556518	0	2530	FUT8	fucosyltransferase 8
7	39948973	39950888	1916	*	.	1000	10.6914	3952.06	3947.91	760	Promoter (<=1kb)	452	39950121	40095555	145435	1	ENSG00000065883	ENST00000340829	0	8621	CDK13	cyclin dependent kinase 13
3	184248478	184250591	2114	*	.	1000	15.6172	3952.04	3947.89	1227	Promoter (<=1kb)	448	184242301	184248962	6662	2	ENSG00000214160	ENST00000397676	0	10195	ALG3	ALG3 alpha-1,3- mannosyltransferase
1	213014793	213016223	1431	*	.	1000	15.8529	3951.73	3947.57	1032	Promoter (<=1kb)	446	212992182	213015826	23645	2	ENSG00000174606	ENST00000360506	0	90806	ANGEL2	angel homolog 2
19	7943349	7944675	1327	*	.	1000	19.4175	3950.78	3946.63	488	Promoter (<=1kb)	464	7926718	7943666	16949	2	ENSG00000104980	ENST00000270538	0	10469	TIMM44	translocase of inner mitochondrial membrane 44
20	30579166	30580541	1376	*	.	1000	20.1307	3949.36	3945.21	1004	Distal Intergenic	465	30545601	30551470	5870	1	ENSG00000283443	ENST00000636528	33565	NA	NA	NA
11	36509314	36510812	1499	*	.	1000	17.8608	3948.9	3944.75	994	Promoter (<=1kb)	456	36510709	36536012	25304	1	ENSG00000166349	ENST00000529126	0	5896	RAG1	recombination activating 1
4	39182026	39183374	1349	*	.	1000	20.3106	3948.67	3944.52	284	Promoter (<=1kb)	449	39182504	39215919	33416	1	ENSG00000157796	ENST00000503697	0	57728	WDR19	WD repeat domain 19
3	17741917	17743377	1461	*	.	1000	11.4114	3948.27	3944.11	901	Promoter (<=1kb)	448	17160372	17742498	582127	2	ENSG00000131374	ENST00000429383	0	9779	TBC1D5	TBC1 domain family member 5
17	45160651	45162356	1706	*	.	1000	14.5023	3947.99	3943.84	1157	Promoter (<=1kb)	462	45160700	45170040	9341	1	ENSG00000168517	ENST00000307275	0	124790	HEXIM2	HEXIM P-TEFb complex subunit 2
16	46688412	46690323	1912	*	.	1000	11.802	3947.81	3943.66	1209	Promoter (<=1kb)	461	46656132	46689178	33047	2	ENSG00000069329	ENST00000299138	0	55737	VPS35	VPS35 retromer complex component
1	156456446	156457930	1485	*	.	1000	10.2544	3947.24	3943.09	879	Promoter (<=1kb)	446	156404253	156456613	52361	2	ENSG00000125462	ENST00000673141	0	10485	MIR9-1HG	MIR9-1 host gene
12	7439557	7440485	929	*	.	1000	19.7863	3946.91	3942.76	582	Promoter (<=1kb)	457	7438780	7439990	1211	2	ENSG00000255836	ENST00000538078	0	100419928	LOC100419928	M-phase phosphoprotein 8 pseudogene
3	23916466	23917801	1336	*	.	1000	13.4176	3944.81	3940.66	591	Promoter (<=1kb)	448	23916591	23919286	2696	1	ENSG00000174748	ENST00000422218	0	6138	RPL15	ribosomal protein L15
15	99250755	99251934	1180	*	.	1000	14.0497	3944.42	3940.27	527	Promoter (<=1kb)	460	99137553	99251223	113671	2	ENSG00000103852	ENST00000558663	0	64927	TTC23	tetratricopeptide repeat domain 23
8	108442842	108444190	1349	*	.	1000	18.0314	3944.37	3940.22	651	Promoter (<=1kb)	453	108201208	108443475	242268	2	ENSG00000104408	ENST00000677409	0	3646	EIF3E	eukaryotic translation initiation factor 3 subunit E
X	48890948	48892224	1277	*	.	1000	15.92	3943.6	3939.45	813	Promoter (<=1kb)	468	48890197	48903105	12909	1	ENSG00000102103	ENST00000651767	751	10084	PQBP1	polyglutamine binding protein 1
X	57120720	57122043	1324	*	.	1000	25.4718	3943.38	3939.24	864	Promoter (<=1kb)	468	57119682	57121315	1634	2	ENSG00000186787	ENST00000374910	0	474343	SPIN2B	spindlin family member 2B
1	5991654	5993525	1872	*	.	1000	15.4888	3942.23	3938.08	870	Promoter (<=1kb)	446	5992262	6101193	108932	1	ENSG00000069424	ENST00000378097	0	8514	KCNAB2	potassium voltage-gated channel subfamily A regulatory beta subunit 2
11	66479371	66480979	1609	*	.	1000	13.6371	3942.23	3938.08	920	Promoter (<=1kb)	456	66480013	66509657	29645	1	ENSG00000254986	ENST00000532677	0	10072	DPP3	dipeptidyl peptidase 3
16	72664284	72665450	1167	*	.	1000	23.8015	3941.75	3937.61	772	Promoter (<=1kb)	461	72665123	72822781	157659	1	ENSG00000259768	ENST00000668995	0	NA	NA	NA
9	115944070	115945414	1345	*	.	1000	14.3923	3941.73	3937.58	656	Distal Intergenic	454	115888169	115925207	37039	2	ENSG00000204148	ENST00000374014	-18863	58483	LINC00474	long intergenic non-protein coding RNA 474
16	67561593	67563551	1959	*	.	1000	14.7444	3941.71	3937.56	550	Promoter (<=1kb)	461	67562467	67639176	76710	1	ENSG00000102974	ENST00000646076	0	10664	CTCF	CCCTC-binding factor
10	95561181	95561729	549	*	.	1000	20.8811	3941.29	3937.14	299	Promoter (<=1kb)	455	95311771	95561378	249608	2	ENSG00000095637	ENST00000371227	0	10580	SORBS1	sorbin and SH3 domain containing 1
19	51393853	51395063	1211	*	.	1000	17.1806	3939.47	3935.32	593	Promoter (<=1kb)	464	51394488	51403650	9163	1	ENSG00000268889	ENST00000600765	0	NA	NA	NA
2	96815328	96816984	1657	*	.	1000	15.3092	3939.42	3935.27	868	Promoter (<=1kb)	447	96816245	96833911	17667	1	ENSG00000168763	ENST00000377060	0	26505	CNNM3	cyclin and CBS domain divalent metal cation transport mediator 3
2	113240068	113241620	1553	*	.	1000	14.4062	3939.24	3935.09	1041	Promoter (<=1kb)	447	113218528	113241683	23156	2	ENSG00000125618	ENST00000468980	63	7849	PAX8	paired box 8
3	10248006	10249685	1680	*	.	1000	18.0935	3937.41	3933.26	391	Promoter (<=1kb)	448	10248023	10281216	33194	1	ENSG00000157014	ENST00000287652	0	9797	TATDN2	TatD DNase domain containing 2
16	30813927	30815101	1175	*	.	1000	20.9148	3936.03	3931.89	590	Promoter (<=1kb)	461	30816030	30816302	273	1	ENSG00000274848	ENST00000612622	-929	NA	NA	NA
3	48088140	48089491	1352	*	.	1000	13.8189	3934.82	3930.67	862	Promoter (<=1kb)	448	47850696	48088839	238144	2	ENSG00000047849	ENST00000395734	0	4134	MAP4	microtubule associated protein 4
15	98852141	98852966	826	*	.	1000	8.59374	3934.5	3930.35	342	Intron (ENST00000649865/ENSG00000140443, intron 2 of 20)	460	98831666	98840189	8524	2	ENSG00000287191	ENST00000689645	-11952	NA	NA	NA
17	40139500	40141123	1624	*	.	1000	15.2366	3934.31	3930.16	685	Promoter (<=1kb)	462	40140318	40167080	26763	1	ENSG00000108349	ENST00000418132	0	22794	CASC3	CASC3 exon junction complex subunit
19	40464353	40466689	2337	*	.	1000	9.23016	3934.28	3930.14	1675	Promoter (<=1kb)	464	40447765	40465764	18000	2	ENSG00000090013	ENST00000643519	0	645	BLVRB	biliverdin reductase B
10	73413048	73414845	1798	*	.	1000	16.7225	3933.99	3929.84	1061	Promoter (<=1kb)	455	73375101	73414058	38958	2	ENSG00000138279	ENST00000372921	0	310	ANXA7	annexin A7
7	44999110	45000764	1655	*	.	1000	15.6004	3932.53	3928.39	843	Promoter (<=1kb)	452	44999475	45076352	76878	1	ENSG00000136280	ENST00000461377	0	83605	CCM2	CCM2 scaffold protein
17	18314465	18315727	1263	*	.	1000	14.3439	3931.59	3927.45	596	Promoter (<=1kb)	462	18315293	18328056	12764	1	ENSG00000176994	ENST00000406438	0	140775	SMCR8	SMCR8-C9orf72 complex subunit
19	44112870	44114288	1419	*	.	1000	18.7859	3931.58	3927.43	363	Promoter (<=1kb)	464	44103007	44113183	10177	2	ENSG00000186019	ENST00000661725	0	100379224	LOC100379224	uncharacterized LOC100379224
12	103929302	103931271	1970	*	.	1000	11.1869	3931.33	3927.19	928	Promoter (<=1kb)	457	103930107	103932929	2823	1	ENSG00000166598	ENST00000549334	0	7184	HSP90B1	heat shock protein 90 beta family member 1
9	113409967	113410945	979	*	.	1000	15.7333	3930.04	3925.9	428	Promoter (<=1kb)	454	113407235	113410343	3109	2	ENSG00000148229	ENST00000479871	0	54107	POLE3	DNA polymerase epsilon 3, accessory subunit
15	64387293	64388227	935	*	.	1000	21.8179	3929.89	3925.75	433	Promoter (<=1kb)	460	64387748	64397760	10013	1	ENSG00000103671	ENST00000559833	0	9325	TRIP4	thyroid hormone receptor interactor 4
17	45619694	45620932	1239	*	.	1000	24.0407	3928.98	3924.84	589	Promoter (<=1kb)	462	45620328	45636394	16067	1	ENSG00000204650	ENST00000585118	0	147081	LINC02210	long intergenic non-protein coding RNA 2210
2	219159931	219161222	1292	*	.	1000	14.2464	3926.19	3922.04	955	Promoter (<=1kb)	447	219069357	219160815	91459	2	ENSG00000187736	ENST00000356853	0	79840	NHEJ1	non-homologous end joining factor 1
19	33063545	33065640	2096	*	.	1000	11.0612	3925.19	3921.05	1422	Promoter (<=1kb)	464	32978592	33064888	86297	2	ENSG00000131941	ENST00000254260	0	85415	RHPN2	rhophilin Rho GTPase binding protein 2
8	80240431	80241468	1038	*	.	1000	25.6234	3924.54	3920.4	359	Promoter (<=1kb)	453	80241389	80241473	85	1	ENSG00000265588	ENST00000579723	0	100847056	MIR5708	microRNA 5708
5	151080488	151081617	1130	*	.	1000	10.5441	3923.76	3919.62	603	Promoter (<=1kb)	450	151029945	151081016	51072	2	ENSG00000145901	ENST00000520931	0	10318	TNIP1	TNFAIP3 interacting protein 1
3	11136742	11137885	1144	*	.	1000	15.2603	3923.51	3919.37	814	Promoter (<=1kb)	448	11137093	11260775	123683	1	ENSG00000196639	ENST00000438284	0	3269	HRH1	histamine receptor H1
19	35544895	35546331	1437	*	.	1000	13.2554	3922.56	3918.42	691	Promoter (<=1kb)	464	35545600	35547523	1924	1	ENSG00000105677	ENST00000593027	0	10430	TMEM147	transmembrane protein 147
9	5437276	5438560	1285	*	.	1000	18.1368	3921.61	3917.47	634	Promoter (<=1kb)	454	5357971	5437925	79955	2	ENSG00000107020	ENST00000223864	0	55848	PLGRKT	plasminogen receptor with a C-terminal lysine
9	122940501	122941915	1415	*	.	1000	20.5661	3921.1	3916.96	367	Promoter (<=1kb)	454	122940833	123103268	162436	1	ENSG00000011454	ENST00000456584	0	23637	RABGAP1	RAB GTPase activating protein 1
18	79678749	79680290	1542	*	.	1000	18.4443	3921.09	3916.95	710	Promoter (<=1kb)	463	79679803	79754503	74701	1	ENSG00000060069	ENST00000613122	0	9150	CTDP1	CTD phosphatase subunit 1
12	120495295	120497232	1938	*	.	1000	15.4651	3921.08	3916.94	788	Promoter (<=1kb)	457	120496082	120496896	815	1	ENSG00000088986	ENST00000548214	0	8655	DYNLL1	dynein light chain LC8-type 1
14	77376375	77377896	1522	*	.	1000	19.2356	3920.19	3916.05	709	Promoter (<=1kb)	459	77335029	77377094	42066	2	ENSG00000100580	ENST00000216468	0	283578	TMED8	transmembrane p24 trafficking protein family member 8
8	10839344	10840376	1033	*	.	1000	19.0735	3920.14	3916	687	Promoter (<=1kb)	453	10839964	10847594	7631	1	ENSG00000253695	ENST00000655622	0	NA	NA	NA
8	70668803	70669545	743	*	.	1000	15.1786	3919.48	3915.34	374	Promoter (<=1kb)	453	70635318	70669174	33857	2	ENSG00000147592	ENST00000522447	0	51110	LACTB2	lactamase beta 2
19	40798072	40799830	1759	*	.	1000	11.1824	3919.27	3915.14	751	Promoter (<=1kb)	464	40798996	40800875	1880	1	ENSG00000269858	ENST00000598654	0	112398	EGLN2	egl-9 family hypoxia inducible factor 2
1	68496014	68497748	1735	*	.	1000	19.7993	3918.95	3914.81	1189	Promoter (<=1kb)	446	68474152	68497082	22931	2	ENSG00000024526	ENST00000456315	0	55635	DEPDC1	DEP domain containing 1
4	82900081	82901449	1369	*	.	1000	16.3265	3918.93	3914.8	549	Promoter (<=1kb)	449	82819011	82900538	81528	2	ENSG00000138674	ENST00000355196	0	22872	SEC31A	SEC31 homolog A, COPII coat complex component
17	31901038	31902236	1199	*	.	1000	18.3382	3918.73	3914.59	734	Promoter (<=1kb)	462	31860904	31901708	40805	2	ENSG00000108651	ENST00000261708	0	55813	UTP6	UTP6 small subunit processome component
1	150515074	150516630	1557	*	.	1000	15.5963	3918.62	3914.48	597	Promoter (<=1kb)	446	150515757	150518032	2276	1	ENSG00000228126	ENST00000416894	0	100874054	FALEC	focally amplified long non-coding RNA in epithelial cancer
X	13652898	13653743	846	*	.	1000	18.6603	3918.13	3913.99	184	Promoter (<=1kb)	468	13653189	13664828	11640	1	ENSG00000176896	ENST00000490617	0	170082	TCEANC	transcription elongation factor A N-terminal and central domain containing
17	36534108	36535859	1752	*	.	1000	11.8301	3917.54	3913.4	818	Promoter (<=1kb)	462	36534987	36539303	4317	1	ENSG00000277161	ENST00000614443	0	284098	PIGW	phosphatidylinositol glycan anchor biosynthesis class W
17	43483209	43484669	1461	*	.	1000	17.8719	3916.4	3912.27	634	Promoter (<=1kb)	462	43483865	43492292	8428	1	ENSG00000067596	ENST00000592258	0	1659	DHX8	DEAH-box helicase 8
6	30066550	30067728	1179	*	.	1000	19.1566	3916.04	3911.91	436	Promoter (<=1kb)	451	30066709	30070333	3625	1	ENSG00000204619	ENST00000376773	0	6992	PPP1R11	protein phosphatase 1 regulatory inhibitor subunit 11
17	51259481	51261415	1935	*	.	1000	13.3384	3915.97	3911.83	639	Promoter (<=1kb)	462	51177425	51260049	82625	2	ENSG00000011258	ENST00000586178	0	54799	MBTD1	mbt domain containing 1
8	98825135	98826668	1534	*	.	1000	20.7025	3915.88	3911.75	962	Promoter (<=1kb)	453	98454631	98825671	371041	2	ENSG00000104375	ENST00000617590	0	6788	STK3	serine/threonine kinase 3
10	68720618	68721933	1316	*	.	1000	21.4325	3915.86	3911.72	469	Promoter (<=1kb)	455	68721012	68742408	21397	1	ENSG00000060339	ENST00000536391	0	55749	CCAR1	cell division cycle and apoptosis regulator 1
X	154428233	154429183	951	*	.	1000	20.2234	3915.8	3911.67	322	Promoter (<=1kb)	468	154428633	154436516	7884	1	ENSG00000071553	ENST00000677342	0	537	ATP6AP1	ATPase H+ transporting accessory protein 1
5	134737764	134739540	1777	*	.	1000	14.8721	3915.25	3911.11	715	Promoter (<=1kb)	450	134738495	134751963	13469	1	ENSG00000164615	ENST00000678771	0	819	CAMLG	calcium modulating ligand
8	133570969	133572793	1825	*	.	1000	8.39192	3914.89	3910.75	1076	Promoter (<=1kb)	453	133454848	133571887	117040	2	ENSG00000008513	ENST00000522652	0	6482	ST3GAL1	ST3 beta-galactoside alpha-2,3-sialyltransferase 1
17	29148355	29149564	1210	*	.	1000	13.5611	3914.06	3909.92	534	Intron (ENST00000582196/ENSG00000263709, intron 1 of 1)	462	29140483	29155489	15007	1	ENSG00000263709	ENST00000582196	7872	NA	NA	NA
7	139034915	139036610	1696	*	.	1000	15.27	3913.91	3909.77	1161	Promoter (<=1kb)	452	139025706	139036042	10337	2	ENSG00000146858	ENST00000275766	0	92092	ZC3HAV1L	zinc finger CCCH-type containing, antiviral 1 like
2	121736379	121737359	981	*	.	1000	16.1899	3913.47	3909.33	568	Promoter (<=1kb)	447	121726945	121736875	9931	2	ENSG00000155438	ENST00000285814	0	84365	NIFK	nucleolar protein interacting with the FHA domain of MKI67
3	100400424	100402075	1652	*	.	1000	14.6084	3913.22	3909.08	710	Promoter (<=1kb)	448	100363431	100401089	37659	2	ENSG00000154174	ENST00000284320	0	9868	TOMM70	translocase of outer mitochondrial membrane 70
10	122373620	122375726	2107	*	.	1000	14.7413	3912.25	3908.12	1004	Promoter (<=1kb)	455	122374696	122416006	41311	1	ENSG00000107679	ENST00000494222	0	59338	PLEKHA1	pleckstrin homology domain containing A1
17	39952529	39953879	1351	*	.	1000	15.3089	3912.11	3907.97	811	Promoter (<=1kb)	462	39953263	39977218	23956	1	ENSG00000167914	ENST00000635792	0	284110	GSDMA	gasdermin A
17	39979852	39981472	1621	*	.	1000	13.0474	3911.59	3907.45	710	Promoter (<=1kb)	462	39980807	39997959	17153	1	ENSG00000108344	ENST00000264639	0	5709	PSMD3	proteasome 26S subunit, non-ATPase 3
1	248825505	248827017	1513	*	.	1000	14.2019	3911.33	3907.19	491	Promoter (<=1kb)	446	248810446	248825915	15470	2	ENSG00000175137	ENST00000366472	0	80851	SH3BP5L	SH3 binding domain protein 5 like
7	139358678	139360868	2191	*	.	1000	10.9341	3911.11	3906.98	1115	Promoter (<=1kb)	452	139359512	139398624	39113	1	ENSG00000146963	ENST00000608368	0	51631	LUC7L2	LUC7 like 2, pre-mRNA splicing factor
20	54172591	54174614	2024	*	.	1000	9.18841	3910.81	3906.67	1402	Promoter (<=1kb)	465	54153446	54173986	20541	2	ENSG00000019186	ENST00000216862	0	1591	CYP24A1	cytochrome P450 family 24 subfamily A member 1
8	134831351	134833197	1847	*	.	1000	13.7868	3910.67	3906.53	1196	Promoter (<=1kb)	453	134832747	134834482	1736	1	ENSG00000254028	ENST00000521444	0	NA	NA	NA
1	143728200	143730079	1880	*	.	1000	16.0248	3909.81	3905.67	1052	Promoter (<=1kb)	446	143729407	143729570	164	2	ENSG00000206737	ENST00000384010	0	26863	RNVU1-18	RNA, variant U1 small nuclear 18
6	122399142	122400324	1183	*	.	1000	23.892	3909.76	3905.63	364	Promoter (<=1kb)	451	122399551	122433119	33569	1	ENSG00000025156	ENST00000452194	0	3298	HSF2	heat shock transcription factor 2
13	96052682	96054247	1566	*	.	1000	20.0858	3909.65	3905.52	817	Promoter (<=1kb)	458	95801580	96053401	251822	2	ENSG00000102595	ENST00000376747	0	55757	UGGT2	UDP-glucose glycoprotein glucosyltransferase 2
17	51165285	51167378	2094	*	.	1000	12.1579	3909.31	3905.17	1031	Promoter (<=1kb)	462	51165435	51171744	6310	1	ENSG00000243678	ENST00000514264	0	4831	NME2	NME/NM23 nucleoside diphosphate kinase 2
17	7688052	7688770	719	*	.	1000	10.9046	3909.13	3904.99	256	Promoter (<=1kb)	462	7688477	7703502	15026	1	ENSG00000141499	ENST00000396463	0	55135	WRAP53	WD repeat containing antisense to TP53
3	184017104	184018450	1347	*	.	1000	20.0577	3908.89	3904.76	903	Promoter (<=1kb)	448	183919934	184017884	97951	2	ENSG00000114770	ENST00000334444	0	10057	ABCC5	ATP binding cassette subfamily C member 5
2	20650383	20651846	1464	*	.	1000	15.2437	3908.84	3904.7	821	Promoter (<=1kb)	447	20560448	20651082	90635	2	ENSG00000118960	ENST00000446825	0	64342	HS1BP3	HCLS1 binding protein 3
15	77632834	77634085	1252	*	.	1000	12.8544	3908.63	3904.5	773	Promoter (<=1kb)	460	77613027	77632912	19886	2	ENSG00000169783	ENST00000355300	0	84894	LINGO1	leucine rich repeat and Ig domain containing 1
13	52651957	52653285	1329	*	.	1000	17.5166	3908.1	3903.97	771	Promoter (<=1kb)	458	52652709	52665649	12941	1	ENSG00000165416	ENST00000483074	0	10910	SUGT1	SGT1 homolog, MIS12 kinetochore complex assembly cochaperone
12	52032522	52033426	905	*	.	1000	13.0606	3908.09	3903.95	545	Intron (ENST00000548977/ENSG00000123358, intron 1 of 2)	457	52037177	52055197	18021	1	ENSG00000123358	ENST00000546842	-3751	3164	NR4A1	nuclear receptor subfamily 4 group A member 1
X	48737081	48738029	949	*	.	1000	23.3723	3906.8	3902.66	224	Promoter (<=1kb)	468	48698963	48737163	38201	2	ENSG00000232828	ENST00000416061	0	NA	NA	NA
3	11600403	11601435	1033	*	.	1000	17.9237	3906.75	3902.62	282	Intron (ENST00000430365/ENSG00000144560, intron 2 of 4)	448	11558069	11604581	46513	2	ENSG00000144560	ENST00000413604	3146	9686	VGLL4	vestigial like family member 4
11	9460307	9461636	1330	*	.	1000	12.2127	3905.76	3901.62	508	Promoter (<=1kb)	456	9460319	9478424	18106	1	ENSG00000166478	ENST00000531943	0	7702	ZNF143	zinc finger protein 143
2	174247851	174249103	1253	*	.	1000	16.0465	3905.34	3901.21	793	Promoter (<=1kb)	447	174072447	174248532	176086	2	ENSG00000138430	ENST00000284719	0	29789	OLA1	Obg like ATPase 1
19	48636815	48637935	1121	*	.	1000	9.18844	3904.48	3900.35	803	Promoter (<=1kb)	464	48630030	48637379	7350	2	ENSG00000105516	ENST00000222122	0	1628	DBP	D-box binding PAR bZIP transcription factor
10	14953258	14954562	1305	*	.	1000	18.2496	3904.47	3900.34	880	Promoter (<=1kb)	455	14897359	14954432	57074	2	ENSG00000152457	ENST00000378289	0	64421	DCLRE1C	DNA cross-link repair 1C
16	57244634	57245889	1256	*	.	1000	16.3977	3904.18	3900.05	531	Promoter (<=1kb)	461	57245259	57246141	883	1	ENSG00000102931	ENST00000565794	0	23568	ARL2BP	ADP ribosylation factor like GTPase 2 binding protein
7	73521543	73522995	1453	*	.	1000	15.1977	3901.89	3897.76	816	Promoter (<=1kb)	452	73440406	73522293	81888	2	ENSG00000009954	ENST00000339594	0	9031	BAZ1B	bromodomain adjacent to zinc finger domain 1B
14	72893033	72894421	1389	*	.	1000	19.1244	3901.61	3897.48	1173	Promoter (<=1kb)	459	72609034	72894101	285068	2	ENSG00000205683	ENST00000556509	0	8110	DPF3	double PHD fingers 3
12	49187879	49189404	1526	*	.	1000	13.7225	3901.39	3897.26	1233	Promoter (<=1kb)	457	49184686	49189078	4393	2	ENSG00000167552	ENST00000679733	0	7846	TUBA1A	tubulin alpha 1a
7	104944803	104945613	811	*	.	1000	21.4955	3900.85	3896.72	393	Intron (ENST00000653259/ENSG00000005483, intron 1 of 1)	452	104941662	105000643	58982	1	ENSG00000005483	ENST00000659776	3141	55904	KMT2E	lysine methyltransferase 2E (inactive)
5	154857181	154858959	1779	*	.	1000	10.9575	3900.76	3896.63	1384	Promoter (<=1kb)	450	154857553	154863220	5668	1	ENSG00000155508	ENST00000521174	0	9337	CNOT8	CCR4-NOT transcription complex subunit 8
7	97871691	97873030	1340	*	.	1000	19.3923	3900.2	3896.07	829	Promoter (<=1kb)	452	97851677	97872408	20732	2	ENSG00000070669	ENST00000394308	0	440	ASNS	asparagine synthetase (glutamine-hydrolyzing)
1	173823924	173825361	1438	*	.	1000	14.7969	3900.17	3896.04	620	Promoter (<=1kb)	446	173824653	173858389	33737	1	ENSG00000117593	ENST00000648960	0	55157	DARS2	aspartyl-tRNA synthetase 2, mitochondrial
8	23528128	23529881	1754	*	.	1000	14.4216	3899.98	3895.85	715	Promoter (<=1kb)	453	23528956	23571463	42508	1	ENSG00000147454	ENST00000417331	0	51312	SLC25A37	solute carrier family 25 member 37
12	40692014	40693869	1856	*	.	1000	15.0854	3899.89	3895.76	361	Promoter (<=1kb)	457	40692439	41072415	379977	1	ENSG00000018236	ENST00000551295	0	1272	CNTN1	contactin 1
1	197145922	197147126	1205	*	.	1000	18.6768	3899.14	3895.01	808	Promoter (<=1kb)	446	197084127	197146669	62543	2	ENSG00000066279	ENST00000367409	0	259266	ASPM	assembly factor for spindle microtubules
X	120629549	120630615	1067	*	.	1000	19.3471	3898.54	3894.41	685	Promoter (<=1kb)	468	120625674	120630054	4381	2	ENSG00000171155	ENST00000304661	0	29071	C1GALT1C1	C1GALT1 specific chaperone 1
12	27243863	27244976	1114	*	.	1000	20.8557	3898.34	3894.21	372	Promoter (<=1kb)	457	27243968	27309197	65230	1	ENSG00000211455	ENST00000541191	0	23012	STK38L	serine/threonine kinase 38 like
10	97632781	97634290	1510	*	.	1000	17.8945	3897.75	3893.62	754	Promoter (<=1kb)	455	97614553	97633500	18948	2	ENSG00000171160	ENST00000478953	0	118812	MORN4	MORN repeat containing 4
5	58582083	58583866	1784	*	.	1000	24.2382	3897.39	3893.26	927	Promoter (<=1kb)	450	58582221	58617871	35651	1	ENSG00000152932	ENST00000513316	0	115827	RAB3C	RAB3C, member RAS oncogene family
12	122225469	122226759	1291	*	.	1000	11.9249	3897.28	3893.15	701	Promoter (<=1kb)	457	122207663	122226568	18906	2	ENSG00000184047	ENST00000443649	0	56616	DIABLO	diablo IAP-binding mitochondrial protein
16	30922148	30923695	1548	*	.	1000	10.5942	3896.85	3892.72	561	Promoter (<=1kb)	461	30923055	30925931	2877	1	ENSG00000099364	ENST00000562798	0	54620	FBXL19	F-box and leucine rich repeat protein 19
11	11620311	11622616	2306	*	.	1000	12.9961	3896.52	3892.39	1776	Promoter (<=1kb)	456	11270877	11622005	351129	2	ENSG00000110328	ENST00000227756	0	374378	GALNT18	polypeptide N-acetylgalactosaminyltransferase 18
7	91263780	91265541	1762	*	.	1000	13.9741	3896.51	3892.38	581	Promoter (<=1kb)	452	91264433	91271326	6894	1	ENSG00000157240	ENST00000287934	0	8321	FZD1	frizzled class receptor 1
5	72319535	72320920	1386	*	.	1000	19.879	3895.29	3891.16	761	Promoter (<=1kb)	450	72320367	72359352	38986	1	ENSG00000049883	ENST00000536805	0	79810	PTCD2	pentatricopeptide repeat domain 2
19	29844290	29845971	1682	*	.	1000	9.41055	3895.2	3891.07	863	Promoter (2-3kb)	464	29838532	29841818	3287	2	ENSG00000286538	ENST00000657512	-2472	NA	NA	NA
2	128027156	128028712	1557	*	.	1000	12.1708	3894.55	3890.42	286	Promoter (<=1kb)	447	127941217	128027295	86079	2	ENSG00000136715	ENST00000357702	0	79595	SAP130	Sin3A associated protein 130
9	83920689	83922044	1356	*	.	1000	15.4466	3892.04	3887.91	705	Promoter (<=1kb)	454	83834099	83921432	87334	2	ENSG00000165115	ENST00000297814	0	55582	KIF27	kinesin family member 27
7	129224399	129225786	1388	*	.	1000	14.7759	3891.88	3887.75	414	Promoter (<=1kb)	452	129225030	129430211	205182	1	ENSG00000158467	ENST00000325006	0	23382	AHCYL2	adenosylhomocysteinase like 2
13	94601358	94602505	1148	*	.	1000	21.9759	3890.7	3886.57	432	Promoter (<=1kb)	458	94601857	94634661	32805	1	ENSG00000152749	ENST00000376958	0	160897	GPR180	G protein-coupled receptor 180
14	31025296	31027230	1935	*	.	1000	14.162	3889.7	3885.57	1266	Promoter (<=1kb)	459	31025638	31130996	105359	1	ENSG00000100478	ENST00000673317	0	11154	AP4S1	adaptor related protein complex 4 subunit sigma 1
16	89816038	89817326	1289	*	.	1000	19.8	3888.94	3884.82	661	Promoter (<=1kb)	461	89737549	89816647	79099	2	ENSG00000187741	ENST00000389301	0	2175	FANCA	FA complementation group A
5	90473343	90475237	1895	*	.	1000	12.463	3888.39	3884.26	1120	Promoter (<=1kb)	450	90474059	90495707	21649	1	ENSG00000113356	ENST00000505345	0	10622	POLR3G	RNA polymerase III subunit G
1	174998865	175000721	1857	*	.	1000	11.4408	3887.48	3883.35	822	Promoter (<=1kb)	446	174999163	175011715	12553	1	ENSG00000116161	ENST00000613570	0	27101	CACYBP	calcyclin binding protein
7	101856476	101857499	1024	*	.	1000	16.4174	3887.17	3883.04	529	Intron (ENST00000437600/ENSG00000257923, intron 1 of 22)	452	101822247	101824729	2483	2	ENSG00000259294	ENST00000560499	-31747	NA	NA	NA
2	15591432	15592477	1046	*	.	1000	13.7815	3886.28	3882.16	401	Promoter (<=1kb)	447	15591532	15631101	39570	1	ENSG00000079785	ENST00000434671	0	1653	DDX1	DEAD-box helicase 1
1	168178446	168180198	1753	*	.	1000	16.7117	3886.27	3882.15	486	Promoter (<=1kb)	446	168178962	168202109	23148	1	ENSG00000143155	ENST00000367833	0	261726	TIPRL	TOR signaling pathway regulator
1	179293099	179294225	1127	*	.	1000	14.3598	3885.74	3881.61	650	Promoter (<=1kb)	446	179293714	179358677	64964	1	ENSG00000057252	ENST00000539888	0	6646	SOAT1	sterol O-acyltransferase 1
19	48321142	48322275	1134	*	.	1000	8.77781	3884.9	3880.78	218	Promoter (<=1kb)	464	48296462	48321873	25412	2	ENSG00000105479	ENST00000474199	0	93233	ODAD1	outer dynein arm docking complex subunit 1
1	224356501	224357670	1170	*	.	1000	17.8748	3883.02	3878.9	348	Promoter (<=1kb)	446	224356858	224379452	22595	1	ENSG00000143771	ENST00000366858	0	29097	CNIH4	cornichon family AMPA receptor auxiliary protein 4
7	95434511	95435773	1263	*	.	1000	13.0855	3882.21	3878.08	562	Promoter (<=1kb)	452	95404862	95435028	30167	2	ENSG00000105854	ENST00000222572	0	5445	PON2	paraoxonase 2
8	93754621	93755613	993	*	.	1000	23.2942	3881.09	3876.97	237	Promoter (<=1kb)	453	93754844	93817637	62794	1	ENSG00000164953	ENST00000684064	0	91147	TMEM67	transmembrane protein 67
20	10034705	10035646	942	*	.	1000	20.0249	3879.24	3875.12	294	Promoter (<=1kb)	465	10034987	10058303	23317	1	ENSG00000132623	ENST00000378392	0	63926	ANKEF1	ankyrin repeat and EF-hand domain containing 1
2	69828971	69830795	1825	*	.	1000	13.6933	3879.23	3875.1	570	Promoter (<=1kb)	447	69829660	69881384	51725	1	ENSG00000087338	ENST00000282570	0	64395	GMCL1	germ cell-less 1, spermatogenesis associated
12	75511062	75512112	1051	*	.	1000	20.9782	3878.82	3874.69	681	Promoter (<=1kb)	457	75490863	75511609	20747	2	ENSG00000111615	ENST00000229214	0	11103	KRR1	KRR1 small subunit processome component homolog
17	17751857	17753334	1478	*	.	1000	13.7167	3878.46	3874.33	388	Intron (ENST00000353383/ENSG00000108557, intron 2 of 5)	462	17759154	17770821	11668	2	ENSG00000237328	ENST00000443696	17487	100861516	RAI1-AS1	RAI1 antisense RNA 1
19	49452627	49454053	1427	*	.	1000	11.2477	3876.73	3872.61	911	Promoter (<=1kb)	464	49446369	49453494	7126	2	ENSG00000104872	ENST00000596049	0	55011	PIH1D1	PIH1 domain containing 1
17	28598509	28600147	1639	*	.	1000	14.1289	3875.07	3870.95	540	Promoter (<=1kb)	462	28577574	28599025	21452	2	ENSG00000076382	ENST00000321765	0	10615	SPAG5	sperm associated antigen 5
2	9422333	9424275	1943	*	.	1000	13.4528	3874.96	3870.84	1275	Promoter (<=1kb)	447	9403475	9423229	19755	2	ENSG00000119185	ENST00000360635	0	9270	ITGB1BP1	integrin subunit beta 1 binding protein 1
14	73058007	73059641	1635	*	.	1000	17.0255	3874.88	3870.76	463	Promoter (<=1kb)	459	73058532	73120391	61860	1	ENSG00000119707	ENST00000527432	0	58517	RBM25	RNA binding motif protein 25
12	6492971	6494402	1432	*	.	1000	12.9238	3872.92	3868.8	995	Promoter (<=1kb)	457	6493356	6511192	17837	1	ENSG00000010292	ENST00000541399	0	9918	NCAPD2	non-SMC condensin I complex subunit D2
17	76352943	76354545	1603	*	.	1000	14.9122	3872.41	3868.29	966	Promoter (<=1kb)	462	76309478	76353916	44439	2	ENSG00000161542	ENST00000446526	0	5635	PRPSAP1	phosphoribosyl pyrophosphate synthetase associated protein 1
8	27310364	27311918	1555	*	.	1000	14.6726	3871.32	3867.2	1164	Promoter (<=1kb)	453	27284886	27311272	26387	2	ENSG00000104228	ENST00000305364	0	23087	TRIM35	tripartite motif containing 35
10	103367548	103368918	1371	*	.	1000	17.8037	3870.44	3866.32	1136	Promoter (<=1kb)	455	103367966	103389045	21080	1	ENSG00000148835	ENST00000690052	0	6877	TAF5	TATA-box binding protein associated factor 5
4	173334029	173335665	1637	*	.	1000	11.9315	3869.36	3865.24	572	Promoter (<=1kb)	449	173331376	173334358	2983	2	ENSG00000164104	ENST00000296503	0	3148	HMGB2	high mobility group box 2
12	53005840	53007419	1580	*	.	1000	13.1944	3869.35	3865.23	330	Promoter (<=1kb)	457	53006282	53021758	15477	1	ENSG00000063046	ENST00000551527	0	1975	EIF4B	eukaryotic translation initiation factor 4B
11	694946	696385	1440	*	.	1000	9.95912	3868.85	3864.73	325	Promoter (<=1kb)	456	644233	695222	50990	2	ENSG00000177030	ENST00000382409	0	10522	DEAF1	DEAF1 transcription factor
2	231411797	231413045	1249	*	.	1000	18.9285	3868.72	3864.6	687	Distal Intergenic	447	231397176	231398257	1082	1	ENSG00000156966	ENST00000479618	14621	93010	B3GNT7	UDP-GlcNAc:betaGal beta-1,3-N-acetylglucosaminyltransferase 7
14	100375885	100377226	1342	*	.	1000	15.7857	3868.7	3864.59	578	Promoter (<=1kb)	459	100333802	100376335	42534	2	ENSG00000140105	ENST00000358655	0	7453	WARS1	tryptophanyl-tRNA synthetase 1
X	120250464	120251868	1405	*	.	1000	19.6824	3868.42	3864.3	267	Promoter (<=1kb)	468	120250752	120258398	7647	1	ENSG00000177485	ENST00000326624	0	10009	ZBTB33	zinc finger and BTB domain containing 33
1	147171949	147173428	1480	*	.	1000	14.581	3866.78	3862.67	703	Promoter (<=1kb)	446	147155106	147172470	17365	2	ENSG00000131791	ENST00000254101	0	5565	PRKAB2	protein kinase AMP-activated non-catalytic subunit beta 2
4	473257	474588	1332	*	.	1000	21.617	3865.69	3861.57	978	Promoter (<=1kb)	449	425815	474051	48237	2	ENSG00000182903	ENST00000515578	0	170960	ZNF721	zinc finger protein 721
5	37378813	37379790	978	*	.	1000	23.3121	3862.41	3858.29	408	Promoter (<=1kb)	450	37379285	37697907	318623	1	ENSG00000082068	ENST00000504564	0	55100	WDR70	WD repeat domain 70
12	10211925	10213907	1983	*	.	1000	12.7705	3860.27	3856.16	545	Promoter (<=1kb)	457	10212458	10214123	1666	1	ENSG00000139112	ENST00000539408	0	23710	GABARAPL1	GABA type A receptor associated protein like 1
15	89750184	89751513	1330	*	.	1000	16.6284	3859.45	3855.34	666	Promoter (<=1kb)	460	89749875	89751249	1375	2	ENSG00000166823	ENST00000300057	0	55897	MESP1	mesoderm posterior bHLH transcription factor 1
2	127857424	127858809	1386	*	.	1000	18.7904	3857.83	3853.72	856	Promoter (<=1kb)	447	127843553	127858155	14603	2	ENSG00000144231	ENST00000272645	0	5433	POLR2D	RNA polymerase II subunit D
9	129035923	129037416	1494	*	.	1000	17.1013	3854.6	3850.49	563	Promoter (<=1kb)	454	129036621	129042400	5780	1	ENSG00000148343	ENST00000477088	0	84895	MIGA2	mitoguardin 2
14	39102320	39103886	1567	*	.	1000	15.5751	3854.55	3850.44	933	Promoter (<=1kb)	459	39031919	39103235	71317	2	ENSG00000100934	ENST00000307712	0	10484	SEC23A	SEC23 homolog A, COPII coat complex component
15	58933025	58934461	1437	*	.	1000	16.0615	3853.69	3849.58	637	Promoter (<=1kb)	460	58879050	58933679	54630	2	ENSG00000137776	ENST00000380516	0	79811	SLTM	SAFB like transcription modulator
17	15260471	15263600	3130	*	.	1000	8.94171	3853.58	3849.46	2148	Promoter (<=1kb)	462	15229773	15263190	33418	2	ENSG00000109099	ENST00000674673	0	5376	PMP22	peripheral myelin protein 22
14	60648092	60650293	2202	*	.	1000	14.4435	3851.78	3847.66	1462	Promoter (<=1kb)	459	60643421	60649477	6057	2	ENSG00000126778	ENST00000645694	0	6495	SIX1	SIX homeobox 1
1	146376334	146378388	2055	*	.	1000	16.3432	3851.67	3847.56	781	Promoter (<=1kb)	446	146376807	146376970	164	1	ENSG00000273768	ENST00000615842	0	NA	NA	NA
19	36666292	36667756	1465	*	.	1000	20.0218	3851.41	3847.3	548	Promoter (<=1kb)	464	36636618	36666837	30220	2	ENSG00000197808	ENST00000588268	0	92283	ZNF461	zinc finger protein 461
16	3003600	3004311	712	*	.	1000	16.9577	3850.77	3846.66	442	Promoter (<=1kb)	461	3004132	3004859	728	1	ENSG00000289281	ENST00000692767	0	NA	NA	NA
17	21098819	21100125	1307	*	.	1000	19.914	3849.72	3845.61	601	Distal Intergenic	462	21084484	21090516	6033	1	ENSG00000236819	ENST00000664341	14335	101060544	LINC01563	long intergenic non-protein coding RNA 1563
14	68978673	68980121	1449	*	.	1000	10.9505	3849.56	3845.45	762	Promoter (<=1kb)	459	68874128	68979302	105175	2	ENSG00000072110	ENST00000394419	0	87	ACTN1	actinin alpha 1
7	101882013	101883545	1533	*	.	1000	12.9686	3849.14	3845.03	985	Intron (ENST00000437600/ENSG00000257923, intron 1 of 22)	452	101913104	102283957	370854	1	ENSG00000257923	ENST00000560541	-29559	1523	CUX1	cut like homeobox 1
14	94080494	94081877	1384	*	.	1000	24.3964	3848.14	3844.03	758	Promoter (<=1kb)	459	94048287	94081202	32916	2	ENSG00000089737	ENST00000621632	0	57062	DDX24	DEAD-box helicase 24
11	3378527	3379455	929	*	.	1000	23.0721	3847.75	3843.64	682	Promoter (<=1kb)	456	3339261	3379133	39873	2	ENSG00000005801	ENST00000528796	0	7748	ZNF195	zinc finger protein 195
11	57530448	57531570	1123	*	.	1000	17.8741	3847.58	3843.47	475	Promoter (<=1kb)	456	57528464	57530754	2291	2	ENSG00000134809	ENST00000257245	0	26519	TIMM10	translocase of inner mitochondrial membrane 10
1	36223713	36225092	1380	*	.	1000	15.0584	3847.56	3843.45	662	Promoter (<=1kb)	446	36224432	36304148	79717	1	ENSG00000054118	ENST00000469141	0	9967	THRAP3	thyroid hormone receptor associated protein 3
9	105244131	105245832	1702	*	.	1000	16.9071	3845.85	3841.74	346	Promoter (<=1kb)	454	105244622	105397346	152725	1	ENSG00000070214	ENST00000374723	0	23446	SLC44A1	solute carrier family 44 member 1
12	57725779	57727169	1391	*	.	1000	13.6672	3845.83	3841.72	410	Promoter (<=1kb)	457	57726271	57728356	2086	1	ENSG00000255737	ENST00000542466	0	100130776	AGAP2-AS1	AGAP2 antisense RNA 1
13	52011125	52012697	1573	*	.	1000	19.3327	3845.57	3841.46	1136	Promoter (<=1kb)	458	51932669	52011450	78782	2	ENSG00000123191	ENST00000242839	0	540	ATP7B	ATPase copper transporting beta
9	87725402	87726858	1457	*	.	1000	14.0231	3845.2	3841.09	634	Promoter (<=1kb)	454	87725551	87731466	5916	1	ENSG00000135047	ENST00000679149	0	1514	CTSL	cathepsin L
9	26946625	26947689	1065	*	.	1000	17.8457	3844.6	3840.49	595	Promoter (<=1kb)	454	26947039	26988728	41690	1	ENSG00000096872	ENST00000519968	0	80173	IFT74	intraflagellar transport 74
17	2336141	2337695	1555	*	.	1000	14.9591	3844.19	3840.08	355	Promoter (<=1kb)	462	2337498	2362157	24660	1	ENSG00000141258	ENST00000572875	0	9905	SGSM2	small G protein signaling modulator 2
5	149344703	149346144	1442	*	.	1000	18.646	3842.76	3838.65	693	Promoter (<=1kb)	450	149345430	149349858	4429	1	ENSG00000164284	ENST00000513661	0	134266	GRPEL2	GrpE like 2, mitochondrial
11	62761021	62762311	1291	*	.	1000	21.6065	3839.98	3835.88	505	Promoter (<=1kb)	456	62761565	62765356	3792	1	ENSG00000168002	ENST00000533442	0	5436	POLR2G	RNA polymerase II subunit G
12	50400246	50401693	1448	*	.	1000	16.0475	3839.2	3835.1	629	Promoter (<=1kb)	457	50400809	50479996	79188	1	ENSG00000161813	ENST00000293618	0	113251	LARP4	La ribonucleoprotein 4
5	163459562	163461118	1557	*	.	1000	11.8284	3838.86	3834.75	983	Promoter (<=1kb)	450	163460203	163471463	11261	1	ENSG00000072571	ENST00000520345	0	3161	HMMR	hyaluronan mediated motility receptor
3	39383179	39384673	1495	*	.	1000	13.1435	3838.74	3834.63	1141	Promoter (<=1kb)	448	39383370	39397351	13982	1	ENSG00000144659	ENST00000650617	0	54977	SLC25A38	solute carrier family 25 member 38
9	2843236	2844557	1322	*	.	1000	18.5533	3837.02	3832.91	871	Promoter (<=1kb)	454	2804152	2844095	39944	2	ENSG00000080608	ENST00000397885	0	9933	PUM3	pumilio RNA binding family member 3
16	87316815	87318009	1195	*	.	1000	17.0321	3836.15	3832.04	611	Promoter (<=1kb)	461	87302801	87317420	14620	2	ENSG00000260456	ENST00000618367	0	100506581	C16orf95	chromosome 16 open reading frame 95
11	8688046	8689313	1268	*	.	1000	11.2316	3836.04	3831.94	1039	Promoter (<=1kb)	456	8689130	8714759	25630	1	ENSG00000166441	ENST00000531102	0	6157	RPL27A	ribosomal protein L27a
12	53451712	53453107	1396	*	.	1000	14.3016	3833.67	3829.57	270	Promoter (<=1kb)	457	53452102	53479826	27725	1	ENSG00000197111	ENST00000359282	0	5094	PCBP2	poly(rC) binding protein 2
X	13734080	13735392	1313	*	.	1000	22.8785	3833.49	3829.39	660	Promoter (<=1kb)	468	13734743	13736542	1800	1	ENSG00000046651	ENST00000485052	0	8481	OFD1	OFD1 centriole and centriolar satellite protein
1	193104395	193105813	1419	*	.	1000	14.3719	3833.23	3829.13	1051	Promoter (<=1kb)	446	193090866	193105433	14568	2	ENSG00000023572	ENST00000608166	0	51022	GLRX2	glutaredoxin 2
12	45989709	45992229	2521	*	.	1000	10.6984	3830.98	3826.88	958	Promoter (<=1kb)	457	45919131	45990574	71444	2	ENSG00000139218	ENST00000369367	0	9169	SCAF11	SR-related CTD associated factor 11
4	169009395	169010953	1559	*	.	1000	19.0766	3830.06	3825.96	1002	Promoter (<=1kb)	449	168863770	169010258	146489	2	ENSG00000145439	ENST00000510042	0	84869	CBR4	carbonyl reductase 4
7	74993354	74994582	1229	*	.	1000	13.5487	3829.63	3825.53	725	Intron (ENST00000616305/ENSG00000274070, intron 1 of 8)	452	75007888	75021943	14056	1	ENSG00000274070	ENST00000622472	-13306	729438	CASTOR2	cytosolic arginine sensor for mTORC1 subunit 2
5	98773015	98774686	1672	*	.	1000	9.6919	3828.14	3824.04	518	Promoter (<=1kb)	450	98773663	98796494	22832	1	ENSG00000174136	ENST00000513185	0	285704	RGMB	repulsive guidance molecule BMP co-receptor b
5	126600376	126601501	1126	*	.	1000	19.9315	3827.34	3823.24	517	Promoter (<=1kb)	450	126600925	126604064	3140	1	ENSG00000164902	ENST00000514725	0	51808	PHAX	phosphorylated adaptor for RNA export
6	32195446	32196694	1249	*	.	1000	13.0958	3826.64	3822.54	189	Promoter (<=1kb)	451	32190766	32195523	4758	2	ENSG00000213654	ENST00000375043	0	63940	GPSM3	G protein signaling modulator 3
16	14974400	14976234	1835	*	.	1000	13.1371	3826.22	3822.12	628	Promoter (<=1kb)	461	14974591	15036678	62088	1	ENSG00000179889	ENST00000563679	0	23042	PDXDC1	pyridoxal dependent decarboxylase domain containing 1
7	151232110	151233485	1376	*	.	1000	17.7096	3826.05	3821.95	342	Promoter (<=1kb)	452	151232483	151238822	6340	1	ENSG00000033100	ENST00000035307	0	54480	CHPF2	chondroitin polymerizing factor 2
8	85219870	85220954	1085	*	.	1000	16.1672	3825.75	3821.65	607	Promoter (<=1kb)	453	85214048	85220374	6327	2	ENSG00000176731	ENST00000619594	0	401466	RBIS	ribosomal biogenesis factor
17	67824528	67825827	1300	*	.	1000	16.6946	3825.64	3821.54	863	Promoter (<=1kb)	462	67825503	67984378	158876	1	ENSG00000171634	ENST00000306378	0	2186	BPTF	bromodomain PHD finger transcription factor
2	85935763	85937321	1559	*	.	1000	11.7653	3825.43	3821.33	847	Promoter (<=1kb)	447	85934535	85937548	3014	2	ENSG00000287628	ENST00000657518	227	NA	NA	NA
17	19214753	19215924	1172	*	.	1000	9.48152	3825.17	3821.07	679	Promoter (<=1kb)	462	19215615	19283217	67603	1	ENSG00000072134	ENST00000582015	0	22905	EPN2	epsin 2
5	96807209	96808705	1497	*	.	1000	14.9429	3825.07	3820.97	1205	Promoter (<=1kb)	450	96760810	96808100	47291	2	ENSG00000164307	ENST00000296754	0	51752	ERAP1	endoplasmic reticulum aminopeptidase 1
9	5303533	5304798	1266	*	.	1000	27.7589	3824.89	3820.79	766	Promoter (<=1kb)	454	5299864	5304716	4853	2	ENSG00000107014	ENST00000381627	0	6019	RLN2	relaxin 2
X	152830404	152831508	1105	*	.	1000	17.8572	3823.91	3819.81	407	Promoter (<=1kb)	468	152830967	152869363	38397	1	ENSG00000147383	ENST00000440023	0	50814	NSDHL	NAD(P) dependent steroid dehydrogenase-like
9	135499286	135501461	2176	*	.	1000	13.2237	3823.02	3818.92	1349	Promoter (<=1kb)	454	135499984	135504673	4690	1	ENSG00000122140	ENST00000371785	0	51116	MRPS2	mitochondrial ribosomal protein S2
5	115169096	115170883	1788	*	.	1000	13.4208	3821.94	3817.85	899	Promoter (<=1kb)	450	115124772	115169908	45137	2	ENSG00000152503	ENST00000513154	0	55521	TRIM36	tripartite motif containing 36
7	87875690	87877191	1502	*	.	1000	13.9508	3821.79	3817.7	604	Promoter (<=1kb)	452	87876216	87908376	32161	1	ENSG00000006634	ENST00000413643	0	10926	DBF4	DBF4 zinc finger
7	76358229	76360033	1805	*	.	1000	12.2547	3821.14	3817.05	1093	Promoter (<=1kb)	452	76326799	76358991	32193	2	ENSG00000170027	ENST00000307630	0	7532	YWHAG	tyrosine 3-monooxygenase/tryptophan 5-monooxygenase activation protein gamma
17	19162323	19163502	1180	*	.	1000	9.39725	3819.59	3815.5	494	Promoter (1-2kb)	462	19160789	19162274	1486	1	ENSG00000262292	ENST00000572818	1534	NA	NA	NA
2	19901000	19902655	1656	*	.	1000	15.315	3819.41	3815.31	719	Promoter (<=1kb)	447	19896631	19901983	5353	2	ENSG00000183891	ENST00000333610	0	130502	TTC32	tetratricopeptide repeat domain 32
20	4134512	4137061	2550	*	.	1000	10.0861	3818.94	3814.84	1284	Intron (ENST00000493223/ENSG00000088826, intron 1 of 1)	465	4148779	4187746	38968	1	ENSG00000088826	ENST00000621355	-11718	54498	SMOX	spermine oxidase
3	66500135	66501786	1652	*	.	1000	19.6521	3818.92	3814.83	1015	Promoter (<=1kb)	448	66378797	66501011	122215	2	ENSG00000144749	ENST00000383703	0	26018	LRIG1	leucine rich repeats and immunoglobulin like domains 1
14	34539067	34540620	1554	*	.	1000	20.7728	3818.9	3814.8	651	Promoter (<=1kb)	459	34515938	34539701	23764	2	ENSG00000129518	ENST00000250454	0	55837	EAPP	E2F associated phosphoprotein
7	64794013	64795112	1100	*	.	1000	25.3945	3818.81	3814.72	337	Promoter (<=1kb)	452	64794388	64833681	39294	1	ENSG00000197008	ENST00000359735	0	7697	ZNF138	zinc finger protein 138
11	8682148	8683328	1181	*	.	1000	15.6934	3818.36	3814.27	521	Promoter (<=1kb)	456	8612040	8682665	70626	2	ENSG00000166436	ENST00000646038	0	9866	TRIM66	tripartite motif containing 66
1	42765952	42767788	1837	*	.	1000	16.4036	3817.72	3813.62	1294	Promoter (<=1kb)	446	42746335	42767084	20750	2	ENSG00000117385	ENST00000397054	0	64175	P3H1	prolyl 3-hydroxylase 1
12	103956296	103957883	1588	*	.	1000	14.473	3815.9	3811.81	883	Promoter (<=1kb)	457	103950194	103957215	7022	2	ENSG00000204954	ENST00000378090	0	728568	C12orf73	chromosome 12 open reading frame 73
19	55062213	55063437	1225	*	.	1000	17.7656	3815.16	3811.06	971	Promoter (<=1kb)	464	55039111	55063076	23966	2	ENSG00000160439	ENST00000591960	0	112724	RDH13	retinol dehydrogenase 13
2	73736610	73737852	1243	*	.	1000	19.7461	3815.09	3811	796	Promoter (<=1kb)	447	73729104	73737335	8232	2	ENSG00000144034	ENST00000489476	0	51002	TPRKB	TP53RK binding protein
2	27408742	27410276	1535	*	.	1000	15.0658	3813.79	3809.7	878	Promoter (<=1kb)	447	27381195	27409555	28361	2	ENSG00000115241	ENST00000472077	0	5496	PPM1G	protein phosphatase, Mg2+/Mn2+ dependent 1G
15	74889374	74890861	1488	*	.	1000	18.8516	3812.83	3808.74	652	Promoter (<=1kb)	460	74890005	74897092	7088	1	ENSG00000178802	ENST00000569931	0	4351	MPI	mannose phosphate isomerase
13	110714513	110715949	1437	*	.	1000	8.5563	3812.77	3808.67	1137	Promoter (<=1kb)	458	110714982	110721071	6090	1	ENSG00000153487	ENST00000375774	0	3621	ING1	inhibitor of growth family member 1
3	195441854	195443498	1645	*	.	1000	14.1843	3812.2	3808.11	1357	Promoter (<=1kb)	448	195274745	195443020	168276	2	ENSG00000114331	ENST00000326793	0	23527	ACAP2	ArfGAP with coiled-coil, ankyrin repeat and PH domains 2
12	76030053	76032902	2850	*	.	1000	8.04386	3811.7	3807.6	1573	Promoter (<=1kb)	457	76025447	76031604	6158	2	ENSG00000139289	ENST00000602540	0	22822	PHLDA1	pleckstrin homology like domain family A member 1
3	128123273	128124353	1081	*	.	1000	22.5363	3809.89	3805.8	616	Promoter (<=1kb)	448	128080810	128123812	43003	2	ENSG00000175792	ENST00000322623	0	8607	RUVBL1	RuvB like AAA ATPase 1
10	37976088	37977033	946	*	.	1000	16.2679	3809.71	3805.62	434	Promoter (<=1kb)	455	37949573	37976647	27075	2	ENSG00000175395	ENST00000302609	0	219749	ZNF25	zinc finger protein 25
13	73058454	73059750	1297	*	.	1000	13.4201	3809.49	3805.39	411	Promoter (<=1kb)	458	73059005	73077538	18534	1	ENSG00000102554	ENST00000377687	0	688	KLF5	Kruppel like factor 5
12	96034633	96036367	1735	*	.	1000	12.6534	3809.19	3805.1	1097	Promoter (<=1kb)	457	96000753	96035587	34835	2	ENSG00000111144	ENST00000228740	0	4048	LTA4H	leukotriene A4 hydrolase
4	169619907	169621174	1268	*	.	1000	18.1531	3808.76	3804.66	516	Promoter (<=1kb)	449	169620526	169720545	100020	1	ENSG00000109572	ENST00000347613	0	1182	CLCN3	chloride voltage-gated channel 3
17	7843568	7845272	1705	*	.	1000	7.41119	3807.39	3803.3	1358	Promoter (<=1kb)	462	7844207	7844972	766	1	ENSG00000132510	ENST00000575521	0	23135	KDM6B	lysine demethylase 6B
19	55117556	55118375	820	*	.	1000	13.5548	3807.23	3803.14	271	Promoter (<=1kb)	464	55090918	55117637	26720	2	ENSG00000125503	ENST00000263433	0	54776	PPP1R12C	protein phosphatase 1 regulatory subunit 12C
17	40417239	40418521	1283	*	.	1000	14.8664	3807.05	3802.96	763	Promoter (<=1kb)	462	40388525	40417896	29372	2	ENSG00000131747	ENST00000423485	0	7153	TOP2A	DNA topoisomerase II alpha
8	1755193	1756467	1275	*	.	1000	19.2024	3806.27	3802.18	518	Promoter (<=1kb)	453	1755778	1771461	15684	1	ENSG00000182372	ENST00000524258	0	2055	CLN8	CLN8 transmembrane ER and ERGIC protein
12	89524361	89526384	2024	*	.	1000	12.0312	3805.71	3801.62	499	Promoter (<=1kb)	457	89419718	89525615	105898	2	ENSG00000139323	ENST00000393179	0	282809	POC1B	POC1 centriolar protein B
11	87037090	87038493	1404	*	.	1000	15.0399	3805.71	3801.62	815	Promoter (<=1kb)	456	87037844	87323758	285915	1	ENSG00000166575	ENST00000340353	0	65084	TMEM135	transmembrane protein 135
1	204493563	204495315	1753	*	.	1000	15.5726	3805.5	3801.41	1167	Promoter (<=1kb)	446	204422633	204494805	72173	2	ENSG00000133056	ENST00000684373	0	5287	PIK3C2B	phosphatidylinositol-4-phosphate 3-kinase catalytic subunit type 2 beta
6	151451815	151452977	1163	*	.	1000	19.5508	3805.27	3801.18	473	Promoter (<=1kb)	451	151452258	151470097	17840	1	ENSG00000146476	ENST00000545879	0	79624	ARMT1	acidic residue methyltransferase 1
11	71447755	71449163	1409	*	.	1000	13.1535	3805.2	3801.11	748	Promoter (<=1kb)	456	71434411	71448393	13983	2	ENSG00000172893	ENST00000355527	0	1717	DHCR7	7-dehydrocholesterol reductase
1	213050818	213051832	1015	*	.	1000	20.3339	3804.83	3800.74	434	Promoter (<=1kb)	446	213051233	213273464	222232	1	ENSG00000136643	ENST00000543354	0	26750	RPS6KC1	ribosomal protein S6 kinase C1
11	18633866	18635125	1260	*	.	1000	17.351	3804.36	3800.27	561	Promoter (<=1kb)	456	18606403	18634342	27940	2	ENSG00000179119	ENST00000336349	0	144108	SPTY2D1	SPT2 chromatin protein domain containing 1
20	25623098	25624795	1698	*	.	1000	12.8307	3804.03	3799.94	1007	Promoter (<=1kb)	465	25612935	25624014	11080	2	ENSG00000170191	ENST00000304788	0	140838	NANP	N-acetylneuraminic acid phosphatase
6	33454100	33455064	965	*	.	1000	22.7444	3803.77	3799.68	394	Promoter (<=1kb)	451	33454543	33455515	973	1	ENSG00000213588	ENST00000621915	0	221504	ZBTB9	zinc finger and BTB domain containing 9
8	124371853	124373411	1559	*	.	1000	13.1666	3803.73	3799.64	748	Promoter (<=1kb)	453	124306189	124372701	66513	2	ENSG00000164983	ENST00000297632	0	157378	TMEM65	transmembrane protein 65
2	24122505	24124260	1756	*	.	1000	16.7308	3803.71	3799.62	920	Promoter (<=1kb)	447	24114809	24123334	8526	2	ENSG00000176732	ENST00000313213	0	375189	PFN4	profilin family member 4
11	66637726	66639551	1826	*	.	1000	13.8613	3803.24	3799.15	858	Promoter (<=1kb)	456	66638667	66668374	29708	1	ENSG00000173933	ENST00000396053	0	5936	RBM4	RNA binding motif protein 4
X	1391499	1393144	1646	*	.	1000	12.4091	3803.01	3798.92	763	Promoter (<=1kb)	468	1386152	1392113	5962	2	ENSG00000169100	ENST00000381401	0	293	SLC25A6	solute carrier family 25 member 6
12	51238221	51239485	1265	*	.	1000	15.5712	3802.96	3798.87	995	Promoter (<=1kb)	457	51238724	51243931	5208	1	ENSG00000183283	ENST00000449723	0	9802	DAZAP2	DAZ associated protein 2
7	64665809	64666756	948	*	.	1000	24.4987	3802.54	3798.45	233	Promoter (<=1kb)	452	64666099	64710602	44504	1	ENSG00000196247	ENST00000395391	0	51427	ZNF107	zinc finger protein 107
14	35121589	35123046	1458	*	.	1000	12.912	3802.01	3797.92	405	Promoter (<=1kb)	459	35085467	35122261	36795	2	ENSG00000092020	ENST00000553273	0	55012	PPP2R3C	protein phosphatase 2 regulatory subunit B''gamma
14	61761724	61763596	1873	*	.	1000	14.524	3801.87	3797.78	655	Promoter (<=1kb)	459	61762420	61796428	34009	1	ENSG00000023608	ENST00000216294	0	6617	SNAPC1	small nuclear RNA activating complex polypeptide 1
2	219597197	219598504	1308	*	.	1000	14.7261	3801.72	3797.63	964	Promoter (<=1kb)	447	219597857	219616451	18595	1	ENSG00000144589	ENST00000456909	0	114790	STK11IP	serine/threonine kinase 11 interacting protein
10	102064867	102066338	1472	*	.	1000	16.334	3801.44	3797.35	424	Promoter (<=1kb)	455	102065349	102068036	2688	1	ENSG00000166189	ENST00000299238	0	79803	HPS6	HPS6 biogenesis of lysosomal organelles complex 2 subunit 3
19	56119655	56121991	2337	*	.	1000	10.6808	3801.03	3796.94	1812	Promoter (<=1kb)	464	56087366	56121295	33930	2	ENSG00000142409	ENST00000610935	0	126208	ZNF787	zinc finger protein 787
19	44051175	44052479	1305	*	.	1000	23.1246	3798.47	3794.38	772	Promoter (<=1kb)	464	44051367	44060788	9422	1	ENSG00000178386	ENST00000588518	0	7766	ZNF223	zinc finger protein 223
14	94025776	94026934	1159	*	.	1000	19.7939	3798.19	3794.11	548	Promoter (<=1kb)	459	94026340	94048930	22591	1	ENSG00000089723	ENST00000203664	0	78990	OTUB2	OTU deubiquitinase, ubiquitin aldehyde binding 2
11	62645766	62647424	1659	*	.	1000	18.0241	3797.3	3793.21	919	Promoter (<=1kb)	456	62624826	62646602	21777	2	ENSG00000089597	ENST00000532402	0	23193	GANAB	glucosidase II alpha subunit
19	57849288	57850870	1583	*	.	1000	20.2749	3795.25	3791.16	510	Promoter (<=1kb)	464	57849859	57865117	15259	1	ENSG00000198466	ENST00000339656	0	84914	ZNF587	zinc finger protein 587
8	124538364	124539548	1185	*	.	1000	21.0553	3795.24	3791.16	751	Promoter (<=1kb)	453	124539101	124580648	41548	1	ENSG00000147684	ENST00000606244	0	4715	NDUFB9	NADH:ubiquinone oxidoreductase subunit B9
1	66924413	66925810	1398	*	.	1000	14.1623	3794.05	3789.97	528	Promoter (<=1kb)	446	66812885	66924856	111972	2	ENSG00000152763	ENST00000371026	0	79819	DNAI4	dynein axonemal intermediate chain 4
11	73982333	73983797	1465	*	.	1000	12.7416	3792.56	3788.47	1011	Promoter (<=1kb)	456	73974672	73982843	8172	2	ENSG00000175567	ENST00000663595	0	7351	UCP2	uncoupling protein 2
9	5338643	5339998	1356	*	.	1000	27.6373	3792.43	3788.34	823	Promoter (<=1kb)	454	5334930	5339876	4947	2	ENSG00000107018	ENST00000223862	0	6013	RLN1	relaxin 1
8	81685740	81686695	956	*	.	1000	21.8157	3791.97	3787.88	616	Promoter (<=1kb)	453	81656914	81686325	29412	2	ENSG00000133731	ENST00000256108	0	3612	IMPA1	inositol monophosphatase 1
14	101072557	101073938	1382	*	.	1000	16.5842	3791.8	3787.71	850	Promoter (<=1kb)	459	101074027	101074583	557	2	ENSG00000230805	ENST00000672599	645	NA	NA	NA
15	30173042	30173858	817	*	.	1000	18.5888	3791.61	3787.52	481	Intron (ENST00000563502/ENSG00000259906, intron 1 of 2)	460	30170563	30179129	8567	2	ENSG00000259906	ENST00000563502	5271	NA	NA	NA
17	18182581	18184029	1449	*	.	1000	12.0134	3791.51	3787.43	865	Promoter (<=1kb)	462	18183078	18209398	26321	1	ENSG00000091542	ENST00000541285	0	54890	ALKBH5	alkB homolog 5, RNA demethylase
17	20008520	20010617	2098	*	.	1000	12.4102	3791.41	3787.32	839	Promoter (<=1kb)	462	20008865	20239409	230545	1	ENSG00000128487	ENST00000676570	0	92521	SPECC1	sperm antigen with calponin homology and coiled-coil domains 1
1	247077899	247079176	1278	*	.	1000	22.0673	3791.08	3787	924	Promoter (<=1kb)	446	246945547	247078736	133190	2	ENSG00000135747	ENST00000465049	0	100533111	ZNF670-ZNF695	ZNF670-ZNF695 readthrough (NMD candidate)
15	32535992	32537363	1372	*	.	1000	19.8517	3790.97	3786.89	692	Promoter (<=1kb)	460	32523026	32536926	13901	2	ENSG00000223509	ENST00000454486	0	NA	NA	NA
19	4342293	4343688	1396	*	.	1000	15.0601	3790.62	3786.54	505	Promoter (<=1kb)	464	4343527	4360086	16560	1	ENSG00000008382	ENST00000262966	0	84954	MPND	MPN domain containing
8	133296946	133298148	1203	*	.	1000	8.79127	3790.03	3785.94	428	Promoter (<=1kb)	453	133237175	133297252	60078	2	ENSG00000104419	ENST00000323851	0	10397	NDRG1	N-myc downstream regulated 1
8	94894552	94896387	1836	*	.	1000	13.0915	3787.27	3783.19	1206	Promoter (<=1kb)	453	94895767	95047090	151324	1	ENSG00000156170	ENST00000523378	0	137682	NDUFAF6	NADH:ubiquinone oxidoreductase complex assembly factor 6
2	156435313	156437136	1824	*	.	1000	13.2651	3785.7	3781.62	983	Promoter (<=1kb)	447	156435441	156586403	150963	1	ENSG00000115159	ENST00000310454	0	2820	GPD2	glycerol-3-phosphate dehydrogenase 2
17	43124430	43125936	1507	*	.	1000	15.489	3785.49	3781.4	1070	Promoter (<=1kb)	462	43044295	43125364	81070	2	ENSG00000012048	ENST00000357654	0	672	BRCA1	BRCA1 DNA repair associated
16	57535106	57536848	1743	*	.	1000	17.0815	3784.85	3780.76	996	Promoter (<=1kb)	461	57512181	57536571	24391	2	ENSG00000135736	ENST00000258214	0	92922	CCDC102A	coiled-coil domain containing 102A
9	126914187	126915198	1012	*	.	1000	20.8881	3784.17	3780.09	553	Promoter (<=1kb)	454	126914774	127217445	302672	1	ENSG00000136828	ENST00000424082	0	9649	RALGPS1	Ral GEF with PH domain and SH3 binding motif 1
20	18287667	18289236	1570	*	.	1000	17.349	3783.39	3779.3	830	Promoter (<=1kb)	465	18288283	18316994	28712	1	ENSG00000125846	ENST00000396026	0	7692	ZNF133	zinc finger protein 133
12	30753917	30755503	1587	*	.	1000	14.4573	3782.7	3778.62	1138	Promoter (<=1kb)	457	30709553	30754514	44962	2	ENSG00000110888	ENST00000298892	0	65981	CAPRIN2	caprin family member 2
3	41961290	41962705	1416	*	.	1000	14.4301	3781.9	3777.82	900	Promoter (<=1kb)	448	41246599	41962103	715505	2	ENSG00000168038	ENST00000301831	0	54986	ULK4	unc-51 like kinase 4
16	28845841	28847300	1460	*	.	1000	13.975	3781.61	3777.53	604	Promoter (<=1kb)	461	28846600	28866284	19685	1	ENSG00000178188	ENST00000563591	0	25970	SH2B1	SH2B adaptor protein 1
17	28644053	28645856	1804	*	.	1000	15.2528	3780.2	3776.12	1203	Promoter (<=1kb)	462	28614446	28645158	30713	2	ENSG00000007202	ENST00000528896	0	9703	KIAA0100	KIAA0100
12	110501089	110502602	1514	*	.	1000	17.8761	3779.56	3775.48	1031	Promoter (<=1kb)	457	110491083	110502111	11029	2	ENSG00000111237	ENST00000549578	0	51699	VPS29	VPS29 retromer complex component
11	72433843	72434982	1140	*	.	1000	19.4615	3779.55	3775.47	733	Promoter (<=1kb)	456	72285495	72434531	149037	2	ENSG00000162129	ENST00000294053	0	81570	CLPB	caseinolytic mitochondrial matrix peptidase chaperone subunit B
13	28718206	28719404	1199	*	.	1000	20.0916	3779.29	3775.21	839	Promoter (<=1kb)	458	28700080	28718970	18891	2	ENSG00000139508	ENST00000266943	0	283537	SLC46A3	solute carrier family 46 member 3
19	14136325	14137741	1417	*	.	1000	12.9785	3778.84	3774.76	464	Promoter (<=1kb)	464	14119512	14136589	17078	2	ENSG00000105011	ENST00000263382	0	55723	ASF1B	anti-silencing function 1B histone chaperone
20	44885170	44886229	1060	*	.	1000	17.2294	3778.73	3774.65	430	Promoter (<=1kb)	465	44885702	44906520	20819	1	ENSG00000166913	ENST00000479421	0	7529	YWHAB	tyrosine 3-monooxygenase/tryptophan 5-monooxygenase activation protein beta
17	1715971	1717897	1927	*	.	1000	6.22812	3777.72	3773.65	1207	Promoter (<=1kb)	462	1716523	1731227	14705	1	ENSG00000167716	ENST00000455636	0	124997	WDR81	WD repeat domain 81
3	113695947	113697083	1137	*	.	1000	14.3516	3777.64	3773.56	929	Promoter (<=1kb)	448	113648385	113696642	48258	2	ENSG00000176542	ENST00000316407	0	205717	USF3	upstream transcription factor family member 3
7	76047363	76048910	1548	*	.	1000	17.5442	3777.59	3773.51	700	Promoter (<=1kb)	452	75996338	76048003	51666	2	ENSG00000127952	ENST00000248600	0	51657	STYXL1	serine/threonine/tyrosine interacting like 1
19	5679643	5681236	1594	*	.	1000	15.6486	3777.27	3773.19	968	Promoter (<=1kb)	464	5681027	5690327	9301	1	ENSG00000130255	ENST00000582380	0	25873	RPL36	ribosomal protein L36
9	111630636	111631932	1297	*	.	1000	17.3717	3776.69	3772.61	670	Promoter (<=1kb)	454	111631334	111654345	23012	1	ENSG00000059769	ENST00000313525	0	548645	DNAJC25	DnaJ heat shock protein family (Hsp40) member C25
7	121395622	121396804	1183	*	.	1000	17.8961	3776.56	3772.48	786	Promoter (<=1kb)	452	121348878	121396308	47431	2	ENSG00000196937	ENST00000359943	0	10447	FAM3C	FAM3 metabolism regulating signaling molecule C
3	160754409	160756463	2055	*	.	1000	12.881	3775.57	3771.5	1155	Promoter (<=1kb)	448	160755602	161022462	266861	1	ENSG00000163590	ENST00000497343	0	151742	PPM1L	protein phosphatase, Mg2+/Mn2+ dependent 1L
8	41528656	41530038	1383	*	.	1000	18.8211	3774.49	3770.41	457	Promoter (<=1kb)	453	41529218	41542239	13022	1	ENSG00000147536	ENST00000520354	0	84296	GINS4	GINS complex subunit 4
5	132490200	132491482	1283	*	.	1000	12.375	3774.12	3770.04	716	Promoter (<=1kb)	450	132440440	132490773	50334	2	ENSG00000125347	ENST00000679921	0	3659	IRF1	interferon regulatory factor 1
14	35808540	35809526	987	*	.	1000	18.2902	3774.09	3770.02	703	Promoter (<=1kb)	459	35538352	35809226	270875	2	ENSG00000174373	ENST00000389698	0	253959	RALGAPA1	Ral GTPase activating protein catalytic subunit alpha 1
11	9313880	9315356	1477	*	.	1000	15.5656	3773.18	3769.1	795	Promoter (<=1kb)	456	9280654	9314567	33914	2	ENSG00000166471	ENST00000299596	0	440026	TMEM41B	transmembrane protein 41B
17	62064758	62066430	1673	*	.	1000	17.4032	3772.58	3768.51	1251	Promoter (<=1kb)	462	61942605	62065278	122674	2	ENSG00000108510	ENST00000397786	0	9969	MED13	mediator complex subunit 13
9	109118572	109120340	1769	*	.	1000	15.1469	3771.87	3767.79	1476	Promoter (<=1kb)	454	109015135	109119947	104813	2	ENSG00000106771	ENST00000374586	0	23731	TMEM245	transmembrane protein 245
16	22205900	22207396	1497	*	.	1000	14.8493	3771	3766.93	209	Promoter (<=1kb)	461	22206278	22288738	82461	1	ENSG00000103319	ENST00000263026	0	29904	EEF2K	eukaryotic elongation factor 2 kinase
6	42928818	42930279	1462	*	.	1000	15.3797	3770.8	3766.73	507	Promoter (<=1kb)	451	42929480	42939294	9815	1	ENSG00000137161	ENST00000372836	0	10695	CNPY3	canopy FGF signaling regulator 3
19	54189223	54191659	2437	*	.	1000	7.02638	3768.99	3764.92	1637	Promoter (<=1kb)	464	54173412	54189443	16032	2	ENSG00000125505	ENST00000437868	0	79143	MBOAT7	membrane bound O-acyltransferase domain containing 7
17	14737740	14738906	1167	*	.	1000	17.7391	3768.74	3764.66	658	Distal Intergenic	462	14725729	14729686	3958	1	ENSG00000226130	ENST00000455092	12011	NA	NA	NA
3	52536227	52537491	1265	*	.	1000	13.1517	3767.6	3763.52	309	Promoter (<=1kb)	448	52536602	52540525	3924	1	ENSG00000168273	ENST00000307106	0	440957	SMIM4	small integral membrane protein 4
15	50764955	50766151	1197	*	.	1000	15.5567	3767.35	3763.27	470	Promoter (<=1kb)	460	50702266	50765706	63441	2	ENSG00000138600	ENST00000261854	0	84888	SPPL2A	signal peptide peptidase like 2A
7	17939228	17941110	1883	*	.	1000	15.9437	3766.02	3761.94	1316	Promoter (<=1kb)	452	17790761	17940494	149734	2	ENSG00000071189	ENST00000428135	0	23161	SNX13	sorting nexin 13
15	89243276	89245026	1751	*	.	1000	16.4641	3765.79	3761.71	644	Promoter (<=1kb)	460	89243945	89316471	72527	1	ENSG00000140525	ENST00000674831	0	55215	FANCI	FA complementation group I
3	142578280	142579400	1121	*	.	1000	16.6579	3765.29	3761.22	558	Promoter (<=1kb)	448	142449235	142578733	129499	2	ENSG00000175054	ENST00000350721	0	545	ATR	ATR serine/threonine kinase
1	161201684	161202835	1152	*	.	1000	17.177	3764.77	3760.7	626	Promoter (<=1kb)	446	161201858	161214289	12432	1	ENSG00000158864	ENST00000467295	0	4720	NDUFS2	NADH:ubiquinone oxidoreductase core subunit S2
5	40834755	40836182	1428	*	.	1000	17.9749	3764.38	3760.31	557	Promoter (<=1kb)	450	40825262	40835222	9961	2	ENSG00000145592	ENST00000274242	0	6167	RPL37	ribosomal protein L37
6	152982452	152984405	1954	*	.	1000	12.8083	3763.51	3759.43	718	Promoter (<=1kb)	451	152970529	152983579	13051	2	ENSG00000112029	ENST00000367241	0	26271	FBXO5	F-box protein 5
12	51172201	51173556	1356	*	.	1000	15.448	3763.07	3759	1003	Promoter (<=1kb)	457	51093656	51173135	79480	2	ENSG00000135457	ENST00000257915	0	7024	TFCP2	transcription factor CP2
17	43169420	43171679	2260	*	.	1000	10.882	3762.85	3758.78	917	Promoter (<=1kb)	462	43093013	43170245	77233	2	ENSG00000012048	ENST00000634433	0	672	BRCA1	BRCA1 DNA repair associated
6	116615821	116617315	1495	*	.	1000	22.1806	3762.52	3758.45	529	Promoter (<=1kb)	451	116616479	116632985	16507	1	ENSG00000111834	ENST00000229554	0	345895	RSPH4A	radial spoke head component 4A
12	48956373	48958010	1638	*	.	1000	12.7252	3762.3	3758.23	1141	Promoter (<=1kb)	457	48935723	48957487	21765	2	ENSG00000134287	ENST00000256682	0	377	ARF3	ADP ribosylation factor 3
2	71276180	71277203	1024	*	.	1000	17.1745	3761.2	3757.13	373	Promoter (<=1kb)	447	71276561	71365705	89145	1	ENSG00000075292	ENST00000494621	0	27332	ZNF638	zinc finger protein 638
8	66123650	66125064	1415	*	.	1000	13.4852	3760.02	3755.95	416	Promoter (1-2kb)	453	66126896	66175485	48590	1	ENSG00000147573	ENST00000353317	-1832	84675	TRIM55	tripartite motif containing 55
10	102393926	102396047	2122	*	.	1000	10.218	3759.86	3755.79	438	Promoter (<=1kb)	455	102394110	102396298	2189	1	ENSG00000077150	ENST00000601386	0	4791	NFKB2	nuclear factor kappa B subunit 2
5	10627317	10628206	890	*	.	1000	17.8473	3757.23	3753.16	589	Promoter (<=1kb)	450	10627260	10628225	966	2	ENSG00000250106	ENST00000506304	19	NA	NA	NA
8	22178566	22179699	1134	*	.	1000	14.1264	3756	3751.93	550	Promoter (<=1kb)	453	22179697	22192334	12638	1	ENSG00000168487	ENST00000523457	0	649	BMP1	bone morphogenetic protein 1
12	7188381	7190528	2148	*	.	1000	15.9377	3754.95	3750.88	1200	Promoter (<=1kb)	457	7188685	7201795	13111	1	ENSG00000139197	ENST00000536883	0	5830	PEX5	peroxisomal biogenesis factor 5
5	150409604	150410878	1275	*	.	1000	16.3967	3754.77	3750.7	343	Promoter (1-2kb)	450	150404486	150412746	8261	2	ENSG00000019582	ENST00000517752	1868	972	CD74	CD74 molecule
4	139453043	139454600	1558	*	.	1000	13.4462	3754	3749.93	708	Promoter (<=1kb)	449	139453232	139454285	1054	1	ENSG00000172007	ENST00000507271	0	83452	RAB33B	RAB33B, member RAS oncogene family
8	95024345	95025427	1083	*	.	1000	18.5942	3753.51	3749.44	633	Promoter (<=1kb)	453	95024989	95058710	33722	1	ENSG00000156170	ENST00000396124	0	137682	NDUFAF6	NADH:ubiquinone oxidoreductase complex assembly factor 6
3	197554443	197556139	1697	*	.	1000	18.5831	3753.29	3749.22	494	Promoter (<=1kb)	448	197509783	197555968	46186	2	ENSG00000161267	ENST00000392379	0	622	BDH1	3-hydroxybutyrate dehydrogenase 1
1	248905685	248907037	1353	*	.	1000	15.9027	3753.1	3749.03	499	Promoter (<=1kb)	446	248906196	248919946	13751	1	ENSG00000185220	ENST00000355360	0	267002	PGBD2	piggyBac transposable element derived 2
10	14959026	14960268	1243	*	.	1000	14.8522	3752.99	3748.92	603	Promoter (<=1kb)	455	14959388	14972857	13470	1	ENSG00000197889	ENST00000407572	0	644890	MEIG1	meiosis/spermiogenesis associated 1
X	15492623	15494005	1383	*	.	1000	20.3678	3752.2	3748.13	727	Promoter (<=1kb)	468	15384799	15493333	108535	2	ENSG00000087842	ENST00000380420	0	8544	PIR	pirin
15	100349563	100351185	1623	*	.	1000	15.5342	3751.97	3747.9	693	Promoter (<=1kb)	460	100344047	100349822	5776	2	ENSG00000189419	ENST00000647665	0	388182	SPATA41	spermatogenesis associated 41
18	74147494	74148814	1321	*	.	1000	17.3255	3751.82	3747.75	897	Promoter (<=1kb)	463	74148523	74158012	9490	1	ENSG00000075336	ENST00000580087	0	29090	TIMM21	translocase of inner mitochondrial membrane 21
7	105521145	105522860	1716	*	.	1000	15.4173	3751.36	3747.29	825	Promoter (<=1kb)	452	105439661	105522267	82607	2	ENSG00000091127	ENST00000481939	0	54517	PUS7	pseudouridine synthase 7
2	241314732	241316659	1928	*	.	1000	11.8262	3750.66	3746.59	507	Promoter (<=1kb)	447	241227291	241315672	88382	2	ENSG00000115677	ENST00000310931	0	3069	HDLBP	high density lipoprotein binding protein
12	22543514	22545040	1527	*	.	1000	15.744	3750.41	3746.34	1174	Promoter (<=1kb)	457	22448583	22544542	95960	2	ENSG00000111731	ENST00000446597	0	9847	C2CD5	C2 calcium dependent domain containing 5
6	37257352	37258560	1209	*	.	1000	22.924	3749.92	3745.85	371	Promoter (<=1kb)	451	37257772	37332970	75199	1	ENSG00000065491	ENST00000373491	0	55633	TBC1D22B	TBC1 domain family member 22B
1	171484887	171486743	1857	*	.	1000	16.8841	3749.88	3745.81	559	Promoter (<=1kb)	446	171485530	171593511	107982	1	ENSG00000117523	ENST00000647382	0	23215	PRRC2C	proline rich coiled-coil 2C
11	19712107	19713695	1589	*	.	1000	15.3985	3748.19	3744.12	676	Promoter (<=1kb)	456	19712837	20121601	408765	1	ENSG00000166833	ENST00000349880	0	89797	NAV2	neuron navigator 2
3	39406316	39407195	880	*	.	1000	15.0562	3747.64	3743.57	263	Promoter (<=1kb)	448	39406716	39408986	2271	1	ENSG00000168028	ENST00000477325	0	3921	RPSA	ribosomal protein SA
4	165112155	165113468	1314	*	.	1000	16.5017	3747.46	3743.39	798	Promoter (<=1kb)	449	165070608	165112860	42253	2	ENSG00000170088	ENST00000306480	0	201931	TMEM192	transmembrane protein 192
7	23105203	23106774	1572	*	.	1000	18.0312	3746.42	3742.36	562	Promoter (<=1kb)	452	23105758	23143901	38144	1	ENSG00000122550	ENST00000479288	0	55975	KLHL7	kelch like family member 7
1	152036216	152037397	1182	*	.	1000	13.988	3746.41	3742.34	805	Promoter (<=1kb)	446	152032506	152037004	4499	2	ENSG00000163191	ENST00000271638	0	6282	S100A11	S100 calcium binding protein A11
3	51384220	51385572	1353	*	.	1000	15.7323	3745.81	3741.74	893	Promoter (<=1kb)	448	51385291	51389397	4107	1	ENSG00000145050	ENST00000528157	0	7873	MANF	mesencephalic astrocyte derived neurotrophic factor
9	94258767	94259886	1120	*	.	1000	27.5283	3744.4	3740.33	505	Promoter (<=1kb)	454	94259298	94301829	42532	1	ENSG00000175787	ENST00000395395	0	169841	ZNF169	zinc finger protein 169
2	127024628	127026073	1446	*	.	1000	16.3976	3742.76	3738.7	1110	Promoter (<=1kb)	447	127025211	127029686	4476	1	ENSG00000260163	ENST00000564121	0	NA	NA	NA
2	121754947	121756099	1153	*	.	1000	21.0273	3742.03	3737.96	541	Promoter (<=1kb)	447	121755545	121767853	12309	1	ENSG00000211460	ENST00000536142	0	7247	TSN	translin
12	25249953	25251722	1770	*	.	1000	15.9438	3740.58	3736.51	1246	Promoter (<=1kb)	457	25205246	25250929	45684	2	ENSG00000133703	ENST00000256078	0	3845	KRAS	KRAS proto-oncogene, GTPase
20	31738657	31739814	1158	*	.	1000	20.0752	3740.48	3736.41	513	Promoter (<=1kb)	465	31739271	31801805	62535	1	ENSG00000088325	ENST00000340513	0	22974	TPX2	TPX2 microtubule nucleation factor
12	106773803	106775249	1447	*	.	1000	12.9025	3740.08	3736.01	471	Promoter (<=1kb)	457	106774621	106814870	40250	1	ENSG00000111785	ENST00000550215	0	55188	RIC8B	RIC8 guanine nucleotide exchange factor B
10	87504381	87505780	1400	*	.	1000	17.4329	3739.98	3735.92	483	Promoter (<=1kb)	455	87504875	87553388	48514	1	ENSG00000107789	ENST00000371994	0	9562	MINPP1	multiple inositol-polyphosphate phosphatase 1
15	83066586	83067843	1258	*	.	1000	15.5324	3739.97	3735.9	768	Promoter (<=1kb)	460	83016423	83067252	50830	2	ENSG00000064726	ENST00000261721	0	53339	BTBD1	BTB domain containing 1
5	138463832	138465676	1845	*	.	1000	5.87949	3737.78	3733.72	1259	Promoter (<=1kb)	450	138465479	138469303	3825	1	ENSG00000120738	ENST00000239938	0	1958	EGR1	early growth response 1
7	83161920	83163266	1347	*	.	1000	16.8172	3737.53	3733.47	1008	Promoter (<=1kb)	452	82754012	83162884	408873	2	ENSG00000186472	ENST00000333891	0	27445	PCLO	piccolo presynaptic cytomatrix protein
16	10385739	10386492	754	*	.	1000	21.8697	3736.03	3731.97	278	Promoter (<=1kb)	461	10386055	10430672	44618	1	ENSG00000166669	ENST00000562527	0	80063	ATF7IP2	activating transcription factor 7 interacting protein 2
2	38777649	38779153	1505	*	.	1000	22.7209	3733.32	3729.26	501	Promoter (<=1kb)	447	38778210	38781947	3738	1	ENSG00000152147	ENST00000409566	0	79833	GEMIN6	gem nuclear organelle associated protein 6
X	2690677	2692092	1416	*	.	1000	15.6391	3732.76	3728.69	487	Promoter (<=1kb)	468	2691187	2741300	50114	1	ENSG00000002586	ENST00000611428	0	4267	CD99	CD99 molecule (Xg blood group)
1	86395268	86396750	1483	*	.	1000	24.8537	3732.11	3728.05	1104	Promoter (<=1kb)	446	86346824	86396262	49439	2	ENSG00000122417	ENST00000359242	0	57489	ODF2L	outer dense fiber of sperm tails 2 like
11	64722952	64723939	988	*	.	1000	16.9481	3731.53	3727.47	303	Promoter (<=1kb)	456	64606174	64723188	117015	2	ENSG00000110076	ENST00000377559	0	9379	NRXN2	neurexin 2
22	37657751	37658869	1119	*	.	1000	19.7478	3731.34	3727.28	766	Promoter (<=1kb)	467	37641832	37658377	16546	2	ENSG00000233360	ENST00000456099	0	101927051	PDXP-DT	PDXP divergent transcript
1	153957776	153958931	1156	*	.	1000	10.5159	3731.05	3726.99	924	Promoter (<=1kb)	446	153947669	153958615	10947	2	ENSG00000160741	ENST00000303569	0	200186	CRTC2	CREB regulated transcription coactivator 2
10	133373052	133373843	792	*	.	1000	20.0662	3730.8	3726.74	352	Promoter (<=1kb)	455	133362485	133373354	10870	2	ENSG00000127884	ENST00000368547	0	1892	ECHS1	enoyl-CoA hydratase, short chain 1
2	151409454	151410798	1345	*	.	1000	16.9157	3729.61	3725.55	413	Promoter (<=1kb)	447	151409883	151475622	65740	1	ENSG00000080345	ENST00000453091	0	55183	RIF1	replication timing regulatory factor 1
17	2302893	2304442	1550	*	.	1000	15.5066	3728.9	3724.84	696	Promoter (<=1kb)	462	2059843	2303785	243943	2	ENSG00000070366	ENST00000263073	0	23293	SMG6	SMG6 nonsense mediated mRNA decay factor
15	30625198	30626962	1765	*	.	1000	15.0418	3728.77	3724.71	891	Promoter (<=1kb)	460	30616998	30625773	8776	2	ENSG00000247728	ENST00000501830	0	NA	NA	NA
7	124929343	124930314	972	*	.	1000	21.6418	3727.67	3723.61	614	Promoter (<=1kb)	452	124822386	124929825	107440	2	ENSG00000128513	ENST00000357628	0	25913	POT1	protection of telomeres 1
19	38506705	38507784	1080	*	.	1000	11.5803	3727.63	3723.57	768	Exon (ENST00000359596/ENSG00000196218, exon 57 of 106)	464	38496215	38565228	69014	1	ENSG00000196218	ENST00000594335	10490	6261	RYR1	ryanodine receptor 1
2	96857129	96859006	1878	*	.	1000	12.3445	3726.51	3722.45	937	Promoter (<=1kb)	447	96840059	96857934	17876	2	ENSG00000163126	ENST00000462692	0	200539	ANKRD23	ankyrin repeat domain 23
17	45197127	45198254	1128	*	.	1000	17.2176	3726.18	3722.12	883	Intron (ENST00000586376/ENSG00000267121, intron 2 of 2)	462	45219735	45220332	598	2	ENSG00000267121	ENST00000590522	22078	339192	FMNL1-DT	FMNL1 divergent transcript
15	63188829	63190507	1679	*	.	1000	16.2508	3725.73	3721.67	559	Promoter (<=1kb)	460	63189560	63256594	67035	1	ENSG00000166128	ENST00000558990	0	51762	RAB8B	RAB8B, member RAS oncogene family
19	12550903	12551996	1094	*	.	1000	19.9904	3725.13	3721.07	697	Promoter (<=1kb)	464	12461559	12551474	89916	2	ENSG00000196826	ENST00000428311	0	NA	NA	NA
5	132963032	132964168	1137	*	.	1000	14.7634	3723.51	3719.45	567	Promoter (<=1kb)	450	132875395	132963634	88240	2	ENSG00000072364	ENST00000265343	0	27125	AFF4	AF4/FMR2 family member 4
2	33411424	33413210	1787	*	.	1000	17.9203	3723.39	3719.33	494	Distal Intergenic	447	33418516	33418564	49	1	ENSG00000283591	ENST00000636982	-5306	100616136	MIR4430	microRNA 4430
9	121743406	121744950	1545	*	.	1000	17.068	3723.25	3719.2	191	Promoter (<=1kb)	454	121743561	121757166	13606	1	ENSG00000136848	ENST00000648693	0	153090	DAB2IP	DAB2 interacting protein
12	100573167	100574618	1452	*	.	1000	16.1165	3721.23	3717.18	485	Promoter (<=1kb)	457	100573683	100624890	51208	1	ENSG00000139354	ENST00000266754	0	283431	GAS2L3	growth arrest specific 2 like 3
15	82749548	82751182	1635	*	.	1000	18.3319	3720.27	3716.22	960	Promoter (<=1kb)	460	82750564	82754937	4374	1	ENSG00000250988	ENST00000544685	0	100505616	SNHG21	small nucleolar RNA host gene 21
7	134986145	134987319	1175	*	.	1000	17.7226	3720.05	3715.99	344	Promoter (<=1kb)	452	134986508	135135778	149271	1	ENSG00000146856	ENST00000436302	0	340351	AGBL3	AGBL carboxypeptidase 3
16	84116349	84117810	1462	*	.	1000	16.9365	3719.6	3715.54	545	Promoter (<=1kb)	461	84053763	84116942	63180	2	ENSG00000140943	ENST00000343411	0	8720	MBTPS1	membrane bound transcription factor peptidase, site 1
11	62880312	62882008	1697	*	.	1000	12.5412	3718.6	3714.54	539	Promoter (<=1kb)	456	62880342	62888880	8539	1	ENSG00000168003	ENST00000544377	0	6520	SLC3A2	solute carrier family 3 member 2
2	201450964	201452364	1401	*	.	1000	15.7559	3717.86	3713.8	641	Promoter (<=1kb)	447	201451734	201458823	7090	1	ENSG00000082146	ENST00000488196	0	55437	STRADB	STE20 related adaptor beta
X	54999569	55000655	1087	*	.	1000	17.7202	3717.28	3713.23	344	Promoter (<=1kb)	468	55000363	55009057	8695	1	ENSG00000169188	ENST00000374987	0	27301	APEX2	apurinic/apyrimidinic endodeoxyribonuclease 2
15	74956191	74957761	1571	*	.	1000	11.7306	3717.27	3713.22	627	Promoter (<=1kb)	460	74954418	74956772	2355	2	ENSG00000178718	ENST00000322177	0	54913	RPP25	ribonuclease P and MRP subunit p25
13	110705794	110706728	935	*	.	1000	17.273	3715.55	3711.49	584	Promoter (<=1kb)	458	110641417	110706116	64700	2	ENSG00000134905	ENST00000257347	0	79587	CARS2	cysteinyl-tRNA synthetase 2, mitochondrial
15	23038823	23040210	1388	*	.	1000	16.045	3715.19	3711.14	882	Promoter (<=1kb)	460	22983192	23039569	56378	2	ENSG00000275835	ENST00000614508	0	114791	TUBGCP5	tubulin gamma complex associated protein 5
16	29789980	29791374	1395	*	.	1000	17.6515	3712.74	3708.68	698	Promoter (<=1kb)	461	29790727	29805384	14658	1	ENSG00000079616	ENST00000691169	0	3835	KIF22	kinesin family member 22
12	122974062	122975711	1650	*	.	1000	11.313	3712.7	3708.65	1146	Promoter (<=1kb)	457	122974580	122980042	5463	1	ENSG00000111325	ENST00000397389	0	79676	OGFOD2	2-oxoglutarate and iron dependent oxygenase domain containing 2
16	81076428	81077821	1394	*	.	1000	15.5582	3712.55	3708.5	811	Promoter (<=1kb)	461	81053497	81077213	23717	2	ENSG00000166455	ENST00000378611	0	123775	C16orf46	chromosome 16 open reading frame 46
19	6424704	6425696	993	*	.	1000	13.8172	3711.8	3707.75	288	Promoter (<=1kb)	464	6413102	6424811	11710	2	ENSG00000088247	ENST00000600480	0	8570	KHSRP	KH-type splicing regulatory protein
15	78298903	78300109	1207	*	.	1000	17.1676	3711.73	3707.67	816	Promoter (<=1kb)	460	78283235	78299605	16371	2	ENSG00000140395	ENST00000558311	0	80349	WDR61	WD repeat domain 61
5	88140717	88141879	1163	*	.	1000	17.3064	3711.64	3707.58	827	Promoter (<=1kb)	450	88140403	88141322	920	2	ENSG00000289462	ENST00000689020	0	NA	NA	NA
16	54928534	54931419	2886	*	.	1000	10.1594	3710.46	3706.41	790	Promoter (<=1kb)	461	54930865	54934485	3621	1	ENSG00000176842	ENST00000394636	0	10265	IRX5	iroquois homeobox 5
3	48634685	48636093	1409	*	.	1000	15.3181	3709.94	3705.89	838	Promoter (<=1kb)	448	48625723	48635461	9739	2	ENSG00000225697	ENST00000395550	0	65010	SLC26A6	solute carrier family 26 member 6
4	48779208	48780890	1683	*	.	1000	14.8867	3709.23	3705.18	1208	Promoter (<=1kb)	449	48497357	48780279	282923	2	ENSG00000075539	ENST00000358350	0	285527	FRYL	FRY like transcription coactivator
17	36948046	36949800	1755	*	.	1000	16.1023	3708.36	3704.31	910	Promoter (<=1kb)	462	36948925	36996972	48048	1	ENSG00000275700	ENST00000679508	0	26574	AATF	apoptosis antagonizing transcription factor
1	179881858	179883406	1549	*	.	1000	9.8967	3707.38	3703.33	412	Promoter (<=1kb)	446	179882042	179919708	37667	1	ENSG00000143337	ENST00000528443	0	26092	TOR1AIP1	torsin 1A interacting protein 1
11	13008918	13010579	1662	*	.	1000	17.0355	3707.38	3703.33	326	Promoter (<=1kb)	456	13009316	13012119	2804	1	ENSG00000189431	ENST00000529419	0	644943	RASSF10	Ras association domain family member 10
9	94030086	94031168	1083	*	.	1000	22.8775	3706.91	3702.86	694	Promoter (<=1kb)	454	94030794	94109856	79063	1	ENSG00000158079	ENST00000375360	0	138639	PTPDC1	protein tyrosine phosphatase domain containing 1
9	99221308	99222771	1464	*	.	1000	17.4278	3706.17	3702.12	645	Promoter (<=1kb)	454	99222064	99230615	8552	1	ENSG00000106803	ENST00000498603	0	10952	SEC61B	SEC61 translocon subunit beta
2	226835370	226836750	1381	*	.	1000	14.5234	3705.56	3701.51	601	Promoter (<=1kb)	447	226835581	226865097	29517	1	ENSG00000144468	ENST00000424132	0	84236	RHBDD1	rhomboid domain containing 1
X	154378141	154379635	1495	*	.	1000	10.1779	3705.51	3701.46	731	Promoter (<=1kb)	468	154379273	154381291	2019	1	ENSG00000102119	ENST00000369835	0	2010	EMD	emerin
1	179081514	179083234	1721	*	.	1000	11.1361	3704.85	3700.8	512	Promoter (<=1kb)	446	179082070	179085855	3786	1	ENSG00000186283	ENST00000367625	0	64222	TOR3A	torsin family 3 member A
6	159789216	159790952	1737	*	.	1000	13.0818	3704.84	3700.79	1172	Promoter (<=1kb)	451	159789812	159798313	8502	1	ENSG00000112110	ENST00000476826	0	29074	MRPL18	mitochondrial ribosomal protein L18
20	833115	834572	1458	*	.	1000	17.3121	3703.12	3699.07	486	Promoter (<=1kb)	465	833715	846277	12563	1	ENSG00000125898	ENST00000381941	0	83541	FAM110A	family with sequence similarity 110 member A
19	57434693	57436128	1436	*	.	1000	18.4	3703.01	3698.96	592	Promoter (<=1kb)	464	57435325	57447101	11777	1	ENSG00000186230	ENST00000334181	0	388567	ZNF749	zinc finger protein 749
3	195634427	195635681	1255	*	.	1000	18.2476	3702.63	3698.58	634	Promoter (<=1kb)	448	195635188	195636301	1114	1	ENSG00000282206	ENST00000633223	0	NA	NA	NA
19	47514405	47515926	1522	*	.	1000	14.3758	3701.92	3697.87	897	Promoter (<=1kb)	464	47487637	47515063	27427	2	ENSG00000105402	ENST00000263354	0	8775	NAPA	NSF attachment protein alpha
14	21103415	21104787	1373	*	.	1000	11.0778	3701.49	3697.44	659	Promoter (<=1kb)	459	21090082	21104722	14641	2	ENSG00000165804	ENST00000451119	0	51222	ZNF219	zinc finger protein 219
[truncated: 75,406 more rows]

## Sheet: ca9 hela and a549 atac
A549_ENCFF674RFR
seqnames	start	end	annotation	geneStart	geneEnd	geneLength	geneStrand	geneId	transcriptId	distanceToTSS	ENTREZID	SYMBOL	GENENAME
9	35673277	35674143	Promoter (<=1kb)	35673928	35681159	7232	1	ENSG00000107159	ENST00000378357	0	768	CA9	carbonic anhydrase 9
HeLa_control
seqnames	start	end	annotation	geneStart	geneEnd	geneLength	geneStrand	geneId	transcriptId	distanceToTSS	ENTREZID	SYMBOL	GENENAME
9	35673408	35674221	Promoter (<=1kb)	35673928	35681159	7232	1	ENSG00000107159	ENST00000378357	0	768	CA9	carbonic anhydrase 9
HeLa_24h Hpx_up_DOR
seqnames	start	end	annotation	geneStart	geneEnd	geneLength	geneStrand	geneId	transcriptId	distanceToTSS	ENTREZID	SYMBOL	GENENAME
9	35673354	35674525	Promoter (<=1kb)	35673918	35681155	7238	1	ENSG00000107159	ENST00000617161	0	768	CA9	carbonic anhydrase 9

## Sheet: fgf11 hela and a549 atac
A549_ENCFF674RFR
no FGF11 open region
HeLa control
no FGF11 open region
HeLa_24h Hpx_up_DOR
seqnames	start	end	annotation	geneStart	geneEnd	geneLength	geneStrand	geneId	transcriptId	distanceToTSS	ENTREZID	SYMBOL	GENENAME
17	7440023	7441135	Promoter (<=1kb)	7440742	7443556	2815	1	ENSG00000161958	ENST00000575398	0	2256	FGF11	fibroblast growth factor 11
